# Supplementary material for: ScanFold 2.0: a rapid approach for identifying potential structured RNA targets in genomes and transcriptomes
Source: PeerJ. 2022 Nov 8;10:e14361. doi: 10.7717/peerj.14361 (PMC9651051; doi:10.7717/peerj.14361)
Supplement: Supplemental Information 1 — The results from all CT files comparisons for HIV-1, ZIKA, and SARS-CoV-2. These comparisons include SF1 to SF2, SF1 to SF1, and SF2 to SF2 using both shuffling methods and 100, 1,000, and 10,000 randomizations. Additionally, the results are summarized for each genome in a separate tab of the file, which includes all the raw comparisons, tables, and calculated differences in percent of paired nucleotides for all conditions, and SF1 and SF2 run time tables and bar charts. [file peerj-10-14361-s001.xlsx]

## Sheet: HIV Mono CT Comparison
Reference File= HIV-1_SF1_100_mono_-2.ct						Reference File= HIV-1_SF1_100_mono_-1.ct						Reference File= HIV-1_SF1_100_mono_NoFilter.ct						Reference File= HIV-1_SF1_1000_mono_-2.ct						Reference File= HIV-1_SF1_1000_mono_-1.ct						Reference File= HIV-1_SF1_1000_mono_NoFilter.ct						Reference File= HIV-1_SF1_10000_mono_-2.ct						Reference File= HIV-1_SF1_10000_mono_-1.ct						Reference File= HIV-1_SF1_10000_mono_NoFilter.ct
Number of nucleotides paired: 566						Number of nucleotides paired: 1430						Number of nucleotides paired: 3176						Number of nucleotides paired: 582						Number of nucleotides paired: 1422						Number of nucleotides paired: 3186						Number of nucleotides paired: 582						Number of nucleotides paired: 1420						Number of nucleotides paired: 3192
Number of nucleotides unpaired: 8607						Number of nucleotides unpaired: 7743						Number of nucleotides unpaired: 5997						Number of nucleotides unpaired: 8591						Number of nucleotides unpaired: 7751						Number of nucleotides unpaired: 5987						Number of nucleotides unpaired: 8591						Number of nucleotides unpaired: 7753						Number of nucleotides unpaired: 5981
Percent of nucleotides paired: 6.1702823503761035%						Percent of nucleotides paired: 15.58922925978415%						Percent of nucleotides paired: 34.62335113921291%						Percent of nucleotides paired: 6.344707293142919%						Percent of nucleotides paired: 15.502016788400741%						Percent of nucleotides paired: 34.732366728442166%						Percent of nucleotides paired: 6.344707293142919%						Percent of nucleotides paired: 15.480213670554889%						Percent of nucleotides paired: 34.79777608197972%
Target File= HIV-1_SF2_-2.ct						Target File= HIV-1_SF2_-1.ct						Target File= HIV-1_SF2_NoFilter.ct						Target File= HIV-1_SF2_-2.ct						Target File= HIV-1_SF2_-1.ct						Target File= HIV-1_SF2_NoFilter.ct						Target File= HIV-1_SF2_-2.ct						Target File= HIV-1_SF2_-1.ct						Target File= HIV-1_SF2_NoFilter.ct
Number of nucleotides paired: 676						Number of nucleotides paired: 1706						Number of nucleotides paired: 3172						Number of nucleotides paired: 676						Number of nucleotides paired: 1706						Number of nucleotides paired: 3172						Number of nucleotides paired: 676						Number of nucleotides paired: 1706						Number of nucleotides paired: 3172
Number of nucleotides unpaired: 8497						Number of nucleotides unpaired: 7467						Number of nucleotides unpaired: 6001						Number of nucleotides unpaired: 8497						Number of nucleotides unpaired: 7467						Number of nucleotides unpaired: 6001						Number of nucleotides unpaired: 8497						Number of nucleotides unpaired: 7467						Number of nucleotides unpaired: 6001
Percent of nucleotides paired: 7.369453831897961%						Percent of nucleotides paired: 18.59805952251172%						Percent of nucleotides paired: 34.5797449035212%						Percent of nucleotides paired: 7.369453831897961%						Percent of nucleotides paired: 18.59805952251172%						Percent of nucleotides paired: 34.5797449035212%						Percent of nucleotides paired: 7.369453831897961%						Percent of nucleotides paired: 18.59805952251172%						Percent of nucleotides paired: 34.5797449035212%
Comparison of reference file to target file:						Comparison of reference file to target file:						Comparison of reference file to target file:						Comparison of reference file to target file:						Comparison of reference file to target file:						Comparison of reference file to target file:						Comparison of reference file to target file:						Comparison of reference file to target file:						Comparison of reference file to target file:
Reference File= HIV-1_SF1_100_mono_-2.ct						Reference File= HIV-1_SF1_100_mono_-1.ct						Reference File= HIV-1_SF1_100_mono_NoFilter.ct						Reference File= HIV-1_SF1_1000_mono_-2.ct						Reference File= HIV-1_SF1_1000_mono_-1.ct						Reference File= HIV-1_SF1_1000_mono_NoFilter.ct						Reference File= HIV-1_SF1_10000_mono_-2.ct						Reference File= HIV-1_SF1_10000_mono_-1.ct						Reference File= HIV-1_SF1_10000_mono_NoFilter.ct
Target File= HIV-1_SF2_-2.ct						Target File= HIV-1_SF2_-1.ct						Target File= HIV-1_SF2_NoFilter.ct						Target File= HIV-1_SF2_-2.ct						Target File= HIV-1_SF2_-1.ct						Target File= HIV-1_SF2_NoFilter.ct						Target File= HIV-1_SF2_-2.ct						Target File= HIV-1_SF2_-1.ct						Target File= HIV-1_SF2_NoFilter.ct
Number of consistent nts/pairings: 9043						Number of consistent nts/pairings: 8755						Number of consistent nts/pairings: 8613						Number of consistent nts/pairings: 9051						Number of consistent nts/pairings: 8742						Number of consistent nts/pairings: 8601						Number of consistent nts/pairings: 9051						Number of consistent nts/pairings: 8744						Number of consistent nts/pairings: 8616
Number of conflicting nts/pairings: 130						Number of conflicting nts/pairings: 418						Number of conflicting nts/pairings: 560						Number of conflicting nts/pairings: 122						Number of conflicting nts/pairings: 431						Number of conflicting nts/pairings: 572						Number of conflicting nts/pairings: 122						Number of conflicting nts/pairings: 429						Number of conflicting nts/pairings: 557
Percent consistency between files: 98.58%						Percent consistency between files: 95.44%						Percent consistency between files: 93.90%						Percent consistency between files: 98.67%						Percent consistency between files: 95.30%						Percent consistency between files: 93.76%						Percent consistency between files: 98.67%						Percent consistency between files: 95.32%						Percent consistency between files: 93.93%
Conflicting BPs between the Reference and Target file						Conflicting BPs between the Reference and Target file						Conflicting BPs between the Reference and Target file						Conflicting BPs between the Reference and Target file						Conflicting BPs between the Reference and Target file						Conflicting BPs between the Reference and Target file						Conflicting BPs between the Reference and Target file						Conflicting BPs between the Reference and Target file						Conflicting BPs between the Reference and Target file
Position	reference(i)	reference(j)	target(i)	target(j)		Position	reference(i)	reference(j)	target(i)	target(j)		Position	reference(i)	reference(j)	target(i)	target(j)		Position	reference(i)	reference(j)	target(i)	target(j)		Position	reference(i)	reference(j)	target(i)	target(j)		Position	reference(i)	reference(j)	target(i)	target(j)		Position	reference(i)	reference(j)	target(i)	target(j)		Position	reference(i)	reference(j)	target(i)	target(j)		Position	reference(i)
67	67	0	67	94		112	112	0	112	125		245	245	0	245	275		67	67	0	67	94		112	112	0	112	125		245	245	0	245	275		67	67	0	67	94		112	112	0	112	125		245	245
68	68	0	68	93		113	113	0	113	124		248	248	0	248	270		68	68	0	68	93		113	113	0	113	124		248	248	0	248	270		68	68	0	68	93		113	113	0	113	124		248	248
69	69	0	69	92		114	114	0	114	123		270	270	0	270	248		69	69	0	69	92		114	114	0	114	123		270	270	0	270	248		69	69	0	69	92		114	114	0	114	123		270	270
70	70	0	70	90		123	123	0	123	114		275	275	0	275	245		70	70	0	70	90		123	123	0	123	114		275	275	0	275	245		70	70	0	70	90		123	123	0	123	114		275	275
71	71	0	71	89		124	124	0	124	113		281	281	353	281	0		71	71	0	71	89		124	124	0	124	113		281	281	353	281	0		71	71	0	71	89		124	124	0	124	113		281	281
72	72	0	72	88		125	125	0	125	112		353	353	281	353	403		72	72	0	72	88		125	125	0	125	112		353	353	281	353	403		72	72	0	72	88		125	125	0	125	112		353	353
73	73	0	73	87		126	126	0	126	138		403	403	0	403	353		73	73	0	73	87		126	126	0	126	138		403	403	0	403	353		73	73	0	73	87		126	126	0	126	138		403	403
74	74	0	74	86		127	127	0	127	137		406	406	477	406	0		74	74	0	74	86		127	127	0	127	137		406	406	477	406	0		74	74	0	74	86		127	127	0	127	137		406	406
86	86	0	86	74		128	128	0	128	136		413	413	467	413	0		86	86	0	86	74		128	128	0	128	136		413	413	467	413	0		86	86	0	86	74		128	128	0	128	136		413	413
87	87	0	87	73		129	129	0	129	135		414	414	466	414	0		87	87	0	87	73		129	129	0	129	135		414	414	466	414	0		87	87	0	87	73		129	129	0	129	135		414	414
88	88	0	88	72		130	130	0	130	134		415	415	465	415	0		88	88	0	88	72		130	130	0	130	134		415	415	465	415	0		88	88	0	88	72		130	130	0	130	134		415	415
89	89	0	89	71		134	134	0	134	130		417	417	463	417	0		89	89	0	89	71		134	134	0	134	130		417	417	463	417	0		89	89	0	89	71		134	134	0	134	130		417	417
90	90	0	90	70		135	135	0	135	129		425	425	0	425	439		90	90	0	90	70		135	135	0	135	129		425	425	0	425	439		90	90	0	90	70		135	135	0	135	129		425	425
92	92	0	92	69		136	136	0	136	128		426	426	0	426	438		92	92	0	92	69		136	136	0	136	128		426	426	0	426	438		92	92	0	92	69		136	136	0	136	128		426	426
93	93	0	93	68		137	137	0	137	127		427	427	0	427	437		93	93	0	93	68		137	137	0	137	127		427	427	0	427	437		93	93	0	93	68		137	137	0	137	127		427	427
94	94	0	94	67		138	138	0	138	126		428	428	0	428	436		94	94	0	94	67		138	138	0	138	126		437	437	0	437	427		94	94	0	94	67		138	138	0	138	126		437	437
586	586	0	586	652		281	281	353	281	0		436	436	0	436	428		586	586	0	586	652		281	281	353	281	0		438	438	0	438	426		586	586	0	586	652		281	281	353	281	0		438	438
587	587	0	587	651		353	353	281	353	0		437	437	0	437	427		587	587	0	587	651		353	353	281	353	0		439	439	0	439	425		587	587	0	587	651		353	353	281	353	0		439	439
588	588	0	588	650		358	358	0	358	398		438	438	0	438	426		588	588	0	588	650		358	358	0	358	398		442	442	0	442	462		588	588	0	588	650		358	358	0	358	398		442	442
589	589	0	589	649		359	359	0	359	397		439	439	0	439	425		589	589	0	589	649		359	359	0	359	397		462	462	0	462	442		589	589	0	589	649		359	359	0	359	397		462	462
590	590	0	590	648		360	360	0	360	396		442	442	0	442	462		590	590	0	590	648		360	360	0	360	396		463	463	417	463	0		590	590	0	590	648		360	360	0	360	396		463	463
591	591	0	591	647		362	362	0	362	394		447	447	0	447	457		591	591	0	591	647		362	362	0	362	394		465	465	415	465	0		591	591	0	591	647		362	362	0	362	394		465	465
592	592	0	592	646		363	363	0	363	393		448	448	0	448	456		592	592	0	592	646		363	363	0	363	393		466	466	414	466	0		592	592	0	592	646		363	363	0	363	393		466	466
593	593	0	593	645		364	364	0	364	392		456	456	0	456	448		593	593	0	593	645		364	364	0	364	392		467	467	413	467	0		593	593	0	593	645		364	364	0	364	392		467	467
594	594	0	594	644		365	365	0	365	391		457	457	0	457	447		594	594	0	594	644		365	365	0	365	391		477	477	406	477	0		594	594	0	594	644		365	365	0	365	391		477	477
595	595	0	595	625		372	372	0	372	383		462	462	0	462	442		595	595	0	595	625		372	372	0	372	383		505	505	0	505	516		595	595	0	595	625		372	372	0	372	383		506	506
596	596	0	596	624		373	373	0	373	382		463	463	417	463	0		596	596	0	596	624		373	373	0	373	382		506	506	0	506	515		596	596	0	596	624		373	373	0	373	382		515	515
597	597	0	597	623		374	374	0	374	381		465	465	415	465	0		597	597	0	597	623		374	374	0	374	381		515	515	0	515	506		597	597	0	597	623		374	374	0	374	381		520	520
598	598	0	598	622		381	381	0	381	374		466	466	414	466	0		598	598	0	598	622		381	381	0	381	374		516	516	0	516	505		598	598	0	598	622		381	381	0	381	374		535	535
622	622	0	622	598		382	382	0	382	373		467	467	413	467	0		622	622	0	622	598		382	382	0	382	373		520	520	0	520	535		622	622	0	622	598		382	382	0	382	373		810	810
623	623	0	623	597		383	383	0	383	372		477	477	406	477	0		623	623	0	623	597		383	383	0	383	372		535	535	0	535	520		623	623	0	623	597		383	383	0	383	372		843	843
624	624	0	624	596		391	391	0	391	365		505	505	0	505	516		624	624	0	624	596		391	391	0	391	365		810	810	843	810	0		624	624	0	624	596		391	391	0	391	365		853	853
625	625	0	625	595		392	392	0	392	364		506	506	0	506	515		625	625	0	625	595		392	392	0	392	364		843	843	810	843	0		625	625	0	625	595		392	392	0	392	364		854	854
627	627	0	627	637		393	393	0	393	363		515	515	0	515	506		627	627	0	627	637		393	393	0	393	363		853	853	963	853	0		627	627	0	627	637		393	393	0	393	363		855	855
628	628	0	628	636		394	394	0	394	362		516	516	0	516	505		628	628	0	628	636		394	394	0	394	362		854	854	962	854	0		628	628	0	628	636		394	394	0	394	362		858	858
629	629	0	629	635		396	396	0	396	360		520	520	0	520	535		629	629	0	629	635		396	396	0	396	360		855	855	961	855	0		629	629	0	629	635		396	396	0	396	360		859	859
630	630	0	630	634		397	397	0	397	359		535	535	0	535	520		630	630	0	630	634		397	397	0	397	359		858	858	958	858	0		630	630	0	630	634		397	397	0	397	359		861	861
634	634	0	634	630		398	398	0	398	358		853	853	963	853	0		634	634	0	634	630		398	398	0	398	358		859	859	957	859	0		634	634	0	634	630		398	398	0	398	358		862	862
635	635	0	635	629		748	748	0	748	785		854	854	962	854	0		635	635	0	635	629		748	748	0	748	785		861	861	955	861	0		635	635	0	635	629		748	748	0	748	785		863	863
636	636	0	636	628		749	749	0	749	784		855	855	961	855	0		636	636	0	636	628		749	749	0	749	784		862	862	954	862	0		636	636	0	636	628		749	749	0	749	784		864	864
637	637	0	637	627		751	751	0	751	782		857	857	934	857	0		637	637	0	637	627		751	751	0	751	782		863	863	953	863	0		637	637	0	637	627		751	751	0	751	782		865	865
644	644	0	644	594		752	752	0	752	781		858	858	958	858	0		644	644	0	644	594		752	752	0	752	781		864	864	950	864	0		644	644	0	644	594		752	752	0	752	781		867	867
645	645	0	645	593		753	753	0	753	780		859	859	957	859	0		645	645	0	645	593		753	753	0	753	780		865	865	949	865	0		645	645	0	645	593		753	753	0	753	780		868	868
646	646	0	646	592		754	754	0	754	778		860	860	974	860	0		646	646	0	646	592		754	754	0	754	778		867	867	947	867	0		646	646	0	646	592		754	754	0	754	778		946	946
647	647	0	647	591		755	755	0	755	777		861	861	955	861	0		647	647	0	647	591		755	755	0	755	777		868	868	946	868	0		647	647	0	647	591		755	755	0	755	777		947	947
648	648	0	648	590		777	777	0	777	755		862	862	954	862	0		648	648	0	648	590		777	777	0	777	755		946	946	868	946	971		648	648	0	648	590		777	777	0	777	755		948	948
649	649	0	649	589		778	778	0	778	754		863	863	953	863	0		649	649	0	649	589		778	778	0	778	754		947	947	867	947	970		649	649	0	649	589		778	778	0	778	754		949	949
650	650	0	650	588		780	780	0	780	753		864	864	950	864	0		650	650	0	650	588		780	780	0	780	753		948	948	969	948	0		650	650	0	650	588		780	780	0	780	753		950	950
651	651	0	651	587		781	781	0	781	752		865	865	949	865	0		651	651	0	651	587		781	781	0	781	752		949	949	865	949	968		651	651	0	651	587		781	781	0	781	752		953	953
652	652	0	652	586		782	782	0	782	751		867	867	947	867	0		652	652	0	652	586		782	782	0	782	751		950	950	864	950	0		652	652	0	652	586		782	782	0	782	751		954	954
1060	1060	0	1060	1068		784	784	0	784	749		868	868	946	868	0		1197	1197	1305	1197	0		784	784	0	784	749		953	953	863	953	965		1197	1197	1305	1197	0		784	784	0	784	749		955	955
1061	1061	0	1061	1067		785	785	0	785	748		914	914	0	914	936		1198	1198	1304	1198	0		785	785	0	785	748		954	954	862	954	964		1198	1198	1304	1198	0		785	785	0	785	748		957	957
1067	1067	0	1067	1061		1197	1197	1305	1197	0		915	915	0	915	935		1201	1201	1301	1201	0		1197	1197	1305	1197	0		955	955	861	955	962		1201	1201	1301	1201	0		1197	1197	1305	1197	0		958	958
1068	1068	0	1068	1060		1198	1198	1304	1198	0		916	916	0	916	934		1205	1205	1295	1205	0		1198	1198	1304	1198	0		957	957	859	957	0		1205	1205	1295	1205	0		1198	1198	1304	1198	0		961	961
1197	1197	1305	1197	0		1205	1205	1295	1205	0		917	917	0	917	933		1206	1206	1294	1206	0		1201	1201	1301	1201	0		958	958	858	958	0		1206	1206	1294	1206	0		1201	1201	1301	1201	0		962	962
1198	1198	1304	1198	0		1214	1214	0	1214	1247		933	933	0	933	917		1294	1294	1206	1294	0		1205	1205	1295	1205	0		961	961	855	961	0		1294	1294	1206	1294	0		1205	1205	1295	1205	0		963	963
1205	1205	1295	1205	0		1215	1215	0	1215	1246		934	934	857	934	916		1295	1295	1205	1295	0		1206	1206	1294	1206	0		962	962	854	962	955		1295	1295	1205	1295	0		1206	1206	1294	1206	0		964	964
1295	1295	1205	1295	0		1246	1246	0	1246	1215		935	935	0	935	915		1301	1301	1201	1301	0		1214	1214	0	1214	1247		963	963	853	963	0		1301	1301	1201	1301	0		1214	1214	0	1214	1247		965	965
1304	1304	1198	1304	0		1247	1247	0	1247	1214		936	936	0	936	914		1304	1304	1198	1304	0		1215	1215	0	1215	1246		964	964	0	964	954		1304	1304	1198	1304	0		1215	1215	0	1215	1246		968	968
1305	1305	1197	1305	0		1295	1295	1205	1295	0		946	946	868	946	971		1305	1305	1197	1305	0		1246	1246	0	1246	1215		965	965	0	965	953		1305	1305	1197	1305	0		1246	1246	0	1246	1215		969	969
1477	1477	0	1477	1550		1304	1304	1198	1304	0		947	947	867	947	970		1477	1477	0	1477	1550		1247	1247	0	1247	1214		968	968	0	968	949		1477	1477	0	1477	1550		1247	1247	0	1247	1214		970	970
1479	1479	0	1479	1548		1305	1305	1197	1305	0		948	948	969	948	0		1479	1479	0	1479	1548		1294	1294	1206	1294	0		969	969	948	969	0		1479	1479	0	1479	1548		1294	1294	1206	1294	0		971	971
1480	1480	0	1480	1547		2145	2145	0	2145	2171		949	949	865	949	968		1480	1480	0	1480	1547		1295	1295	1205	1295	0		970	970	0	970	947		1480	1480	0	1480	1547		1295	1295	1205	1295	0		997	997
1486	1486	0	1486	1541		2146	2146	0	2146	2170		950	950	864	950	0		1486	1486	0	1486	1541		1301	1301	1201	1301	0		971	971	0	971	946		1486	1486	0	1486	1541		1301	1301	1201	1301	0		998	998
1487	1487	0	1487	1540		2147	2147	0	2147	2169		953	953	863	953	965		1487	1487	0	1487	1540		1304	1304	1198	1304	0		997	997	0	997	1014		1487	1487	0	1487	1540		1304	1304	1198	1304	0		999	999
1518	1518	0	1518	1536		2148	2148	0	2148	2168		954	954	862	954	964		1518	1518	0	1518	1536		1305	1305	1197	1305	0		998	998	0	998	1013		1518	1518	0	1518	1536		1305	1305	1197	1305	0		1000	1000
1519	1519	0	1519	1535		2149	2149	0	2149	2167		955	955	861	955	962		1519	1519	0	1519	1535		2145	2145	0	2145	2171		999	999	0	999	1012		1519	1519	0	1519	1535		2145	2145	0	2145	2171		1001	1001
1520	1520	0	1520	1534		2150	2150	0	2150	2166		957	957	859	957	0		1520	1520	0	1520	1534		2146	2146	0	2146	2170		1000	1000	0	1000	1011		1520	1520	0	1520	1534		2146	2146	0	2146	2170		1010	1010
1521	1521	0	1521	1533		2166	2166	0	2166	2150		958	958	858	958	0		1521	1521	0	1521	1533		2147	2147	0	2147	2169		1001	1001	0	1001	1010		1521	1521	0	1521	1533		2147	2147	0	2147	2169		1011	1011
1523	1523	0	1523	1531		2167	2167	0	2167	2149		961	961	855	961	0		1523	1523	0	1523	1531		2148	2148	0	2148	2168		1010	1010	0	1010	1001		1523	1523	0	1523	1531		2148	2148	0	2148	2168		1012	1012
1531	1531	0	1531	1523		2168	2168	0	2168	2148		962	962	854	962	955		1531	1531	0	1531	1523		2149	2149	0	2149	2167		1011	1011	0	1011	1000		1531	1531	0	1531	1523		2149	2149	0	2149	2167		1013	1013
1533	1533	0	1533	1521		2169	2169	0	2169	2147		963	963	853	963	0		1533	1533	0	1533	1521		2150	2150	0	2150	2166		1012	1012	0	1012	999		1533	1533	0	1533	1521		2150	2150	0	2150	2166		1014	1014
1534	1534	0	1534	1520		2170	2170	0	2170	2146		964	964	0	964	954		1534	1534	0	1534	1520		2166	2166	0	2166	2150		1013	1013	0	1013	998		1534	1534	0	1534	1520		2166	2166	0	2166	2150		1197	1197
1535	1535	0	1535	1519		2171	2171	0	2171	2145		965	965	0	965	953		1535	1535	0	1535	1519		2167	2167	0	2167	2149		1014	1014	0	1014	997		1535	1535	0	1535	1519		2167	2167	0	2167	2149		1198	1198
1536	1536	0	1536	1518		2227	2227	2236	2227	0		968	968	0	968	949		1536	1536	0	1536	1518		2168	2168	0	2168	2148		1197	1197	1305	1197	0		1536	1536	0	1536	1518		2168	2168	0	2168	2148		1201	1201
1540	1540	0	1540	1487		2228	2228	2235	2228	0		969	969	948	969	0		1540	1540	0	1540	1487		2169	2169	0	2169	2147		1198	1198	1304	1198	0		1540	1540	0	1540	1487		2169	2169	0	2169	2147		1205	1205
1541	1541	0	1541	1486		2235	2235	2228	2235	0		970	970	0	970	947		1541	1541	0	1541	1486		2170	2170	0	2170	2146		1201	1201	1301	1201	0		1541	1541	0	1541	1486		2170	2170	0	2170	2146		1206	1206
1547	1547	0	1547	1480		2236	2236	2227	2236	0		971	971	0	971	946		1547	1547	0	1547	1480		2171	2171	0	2171	2145		1205	1205	1295	1205	0		1547	1547	0	1547	1480		2171	2171	0	2171	2145		1294	1294
1548	1548	0	1548	1479		2268	2268	0	2268	2310		974	974	860	974	0		1548	1548	0	1548	1479		2227	2227	2236	2227	0		1206	1206	1294	1206	0		1548	1548	0	1548	1479		2227	2227	2236	2227	0		1295	1295
1550	1550	0	1550	1477		2269	2269	0	2269	2309		997	997	0	997	1014		1550	1550	0	1550	1477		2228	2228	2235	2228	0		1294	1294	1206	1294	0		1550	1550	0	1550	1477		2228	2228	2235	2228	0		1300	1300
1551	1551	0	1551	1574		2270	2270	0	2270	2308		998	998	0	998	1013		1551	1551	0	1551	1574		2235	2235	2228	2235	0		1295	1295	1205	1295	0		1551	1551	0	1551	1574		2235	2235	2228	2235	0		1301	1301
1554	1554	0	1554	1571		2271	2271	0	2271	2307		999	999	0	999	1012		1574	1574	0	1574	1551		2236	2236	2227	2236	0		1300	1300	0	1300	1352		1574	1574	0	1574	1551		2236	2236	2227	2236	0		1302	1302
1555	1555	0	1555	1570		2272	2272	0	2272	2306		1000	1000	0	1000	1011		1709	1709	0	1709	1728		2268	2268	0	2268	2310		1301	1301	1201	1301	1351		1709	1709	0	1709	1728		2268	2268	0	2268	2310		1303	1303
1556	1556	0	1556	1569		2278	2278	0	2278	2300		1001	1001	0	1001	1010		1710	1710	0	1710	1727		2269	2269	0	2269	2309		1302	1302	0	1302	1350		1710	1710	0	1710	1727		2269	2269	0	2269	2309		1304	1304
1557	1557	0	1557	1568		2279	2279	0	2279	2299		1010	1010	0	1010	1001		1711	1711	0	1711	1726		2270	2270	0	2270	2308		1303	1303	0	1303	1349		1711	1711	0	1711	1726		2270	2270	0	2270	2308		1305	1305
1568	1568	0	1568	1557		2280	2280	0	2280	2298		1011	1011	0	1011	1000		1713	1713	0	1713	1724		2271	2271	0	2271	2307		1304	1304	1198	1304	1348		1713	1713	0	1713	1724		2271	2271	0	2271	2307		1308	1308
1569	1569	0	1569	1556		2298	2298	0	2298	2280		1012	1012	0	1012	999		1714	1714	0	1714	1723		2272	2272	0	2272	2306		1305	1305	1197	1305	1347		1714	1714	0	1714	1723		2272	2272	0	2272	2306		1309	1309
1570	1570	0	1570	1555		2299	2299	0	2299	2279		1013	1013	0	1013	998		1715	1715	0	1715	1722		2278	2278	0	2278	2300		1308	1308	0	1308	1345		1715	1715	0	1715	1722		2278	2278	0	2278	2300		1344	1344
1571	1571	0	1571	1554		2300	2300	0	2300	2278		1014	1014	0	1014	997		1716	1716	0	1716	1721		2279	2279	0	2279	2299		1309	1309	0	1309	1344		1716	1716	0	1716	1721		2279	2279	0	2279	2299		1345	1345
1574	1574	0	1574	1551		2306	2306	0	2306	2272		1197	1197	1305	1197	0		1721	1721	0	1721	1716		2280	2280	0	2280	2298		1344	1344	0	1344	1309		1721	1721	0	1721	1716		2280	2280	0	2280	2298		1347	1347
1709	1709	0	1709	1728		2307	2307	0	2307	2271		1198	1198	1304	1198	0		1722	1722	0	1722	1715		2298	2298	0	2298	2280		1345	1345	0	1345	1308		1722	1722	0	1722	1715		2298	2298	0	2298	2280		1348	1348
1710	1710	0	1710	1727		2308	2308	0	2308	2270		1205	1205	1295	1205	0		1723	1723	0	1723	1714		2299	2299	0	2299	2279		1347	1347	0	1347	1305		1723	1723	0	1723	1714		2299	2299	0	2299	2279		1349	1349
1711	1711	0	1711	1726		2309	2309	0	2309	2269		1295	1295	1205	1295	0		1724	1724	0	1724	1713		2300	2300	0	2300	2278		1348	1348	0	1348	1304		1724	1724	0	1724	1713		2300	2300	0	2300	2278		1350	1350
1713	1713	0	1713	1724		2310	2310	0	2310	2268		1300	1300	0	1300	1352		1726	1726	0	1726	1711		2306	2306	0	2306	2272		1349	1349	0	1349	1303		1726	1726	0	1726	1711		2306	2306	0	2306	2272		1351	1351
1714	1714	0	1714	1723		2330	2330	0	2330	2366		1301	1301	0	1301	1351		1727	1727	0	1727	1710		2307	2307	0	2307	2271		1350	1350	0	1350	1302		1727	1727	0	1727	1710		2307	2307	0	2307	2271		1352	1352
1715	1715	0	1715	1722		2331	2331	0	2331	2365		1302	1302	0	1302	1350		1728	1728	0	1728	1709		2308	2308	0	2308	2270		1351	1351	0	1351	1301		1728	1728	0	1728	1709		2308	2308	0	2308	2270		1422	1422
1716	1716	0	1716	1721		2332	2332	0	2332	2364		1303	1303	0	1303	1349		2778	2778	2805	2778	0		2309	2309	0	2309	2269		1352	1352	0	1352	1300		2778	2778	2805	2778	0		2309	2309	0	2309	2269		1423	1423
1721	1721	0	1721	1716		2333	2333	0	2333	2363		1304	1304	1198	1304	1348		2779	2779	2804	2779	0		2310	2310	0	2310	2268		1422	1422	0	1422	1442		2779	2779	2804	2779	0		2310	2310	0	2310	2268		1441	1441
1722	1722	0	1722	1715		2334	2334	0	2334	2362		1305	1305	1197	1305	1347		2804	2804	2779	2804	0		2332	2332	0	2332	2364		1423	1423	0	1423	1441		2804	2804	2779	2804	0		2332	2332	0	2332	2364		1442	1442
1723	1723	0	1723	1714		2335	2335	0	2335	2361		1308	1308	0	1308	1345		2805	2805	2778	2805	0		2333	2333	0	2333	2363		1441	1441	0	1441	1423		2805	2805	2778	2805	0		2333	2333	0	2333	2363		1922	1922
1724	1724	0	1724	1713		2340	2340	0	2340	2357		1309	1309	0	1309	1344		8669	8669	0	8669	8679		2334	2334	0	2334	2362		1442	1442	0	1442	1422		8669	8669	0	8669	8679		2334	2334	0	2334	2362		1923	1923
1726	1726	0	1726	1711		2341	2341	0	2341	2356		1344	1344	0	1344	1309		8670	8670	0	8670	8678		2335	2335	0	2335	2361		1922	1922	0	1922	1930		8670	8670	0	8670	8678		2335	2335	0	2335	2361		1924	1924
1727	1727	0	1727	1710		2342	2342	0	2342	2355		1345	1345	0	1345	1308		8671	8671	0	8671	8677		2340	2340	0	2340	2357		1923	1923	0	1923	1929		8671	8671	0	8671	8677		2340	2340	0	2340	2357		1925	1925
1728	1728	0	1728	1709		2343	2343	0	2343	2354		1347	1347	0	1347	1305		8677	8677	0	8677	8671		2341	2341	0	2341	2356		1924	1924	0	1924	1928		8677	8677	0	8677	8671		2341	2341	0	2341	2356		1926	1926
2778	2778	2805	2778	0		2344	2344	0	2344	2353		1348	1348	0	1348	1304		8678	8678	0	8678	8670		2342	2342	0	2342	2355		1925	1925	1956	1925	0		8678	8678	0	8678	8670		2342	2342	0	2342	2355		1927	1927
2779	2779	2804	2779	0		2353	2353	0	2353	2344		1349	1349	0	1349	1303		8679	8679	0	8679	8669		2343	2343	0	2343	2354		1926	1926	1955	1926	0		8679	8679	0	8679	8669		2343	2343	0	2343	2354		1928	1928
2804	2804	2779	2804	0		2354	2354	0	2354	2343		1350	1350	0	1350	1302		9018	9018	0	9018	9039		2344	2344	0	2344	2353		1927	1927	1954	1927	0		9018	9018	0	9018	9039		2344	2344	0	2344	2353		1929	1929
2805	2805	2778	2805	0		2355	2355	0	2355	2342		1351	1351	0	1351	1301		9019	9019	0	9019	9038		2353	2353	0	2353	2344		1928	1928	0	1928	1924		9019	9019	0	9019	9038		2353	2353	0	2353	2344		1930	1930
8669	8669	0	8669	8679		2356	2356	0	2356	2341		1352	1352	0	1352	1300		9020	9020	0	9020	9037		2354	2354	0	2354	2343		1929	1929	0	1929	1923		9020	9020	0	9020	9037		2354	2354	0	2354	2343		1933	1933
8670	8670	0	8670	8678		2357	2357	0	2357	2340		1422	1422	0	1422	1442		9021	9021	0	9021	9036		2355	2355	0	2355	2342		1930	1930	0	1930	1922		9021	9021	0	9021	9036		2355	2355	0	2355	2342		1934	1934
8671	8671	0	8671	8677		2361	2361	0	2361	2335		1423	1423	0	1423	1441		9022	9022	0	9022	9035		2356	2356	0	2356	2341		1933	1933	1948	1933	0		9022	9022	0	9022	9035		2356	2356	0	2356	2341		1947	1947
8677	8677	0	8677	8671		2362	2362	0	2362	2334		1441	1441	0	1441	1423		9023	9023	0	9023	9034		2357	2357	0	2357	2340		1934	1934	1947	1934	0		9023	9023	0	9023	9034		2357	2357	0	2357	2340		1948	1948
8678	8678	0	8678	8670		2363	2363	0	2363	2333		1442	1442	0	1442	1422		9025	9025	0	9025	9033		2361	2361	0	2361	2335		1947	1947	1934	1947	0		9025	9025	0	9025	9033		2361	2361	0	2361	2335		1954	1954
8679	8679	0	8679	8669		2364	2364	0	2364	2332		1922	1922	0	1922	1930		9026	9026	0	9026	9032		2362	2362	0	2362	2334		1948	1948	1933	1948	0		9026	9026	0	9026	9032		2362	2362	0	2362	2334		1955	1955
9018	9018	0	9018	9039		2365	2365	0	2365	2331		1923	1923	0	1923	1929		9032	9032	0	9032	9026		2363	2363	0	2363	2333		1954	1954	1927	1954	0		9032	9032	0	9032	9026		2363	2363	0	2363	2333		1956	1956
9019	9019	0	9019	9038		2366	2366	0	2366	2330		1924	1924	0	1924	1928		9033	9033	0	9033	9025		2364	2364	0	2364	2332		1955	1955	1926	1955	0		9033	9033	0	9033	9025		2364	2364	0	2364	2332		2217	2217
9020	9020	0	9020	9037		2417	2417	2499	2417	0		1925	1925	1956	1925	0		9034	9034	0	9034	9023		2417	2417	2499	2417	0		1956	1956	1925	1956	0		9034	9034	0	9034	9023		2417	2417	2499	2417	0		2219	2219
9021	9021	0	9021	9036		2418	2418	2498	2418	0		1926	1926	1955	1926	0		9035	9035	0	9035	9022		2418	2418	2498	2418	0		2217	2217	0	2217	2260		9035	9035	0	9035	9022		2418	2418	2498	2418	0		2227	2227
9022	9022	0	9022	9035		2425	2425	2491	2425	0		1927	1927	1954	1927	0		9036	9036	0	9036	9021		2425	2425	2491	2425	0		2219	2219	0	2219	2258		9036	9036	0	9036	9021		2425	2425	2491	2425	0		2228	2228
9023	9023	0	9023	9034		2426	2426	2490	2426	0		1928	1928	0	1928	1924		9037	9037	0	9037	9020		2426	2426	2490	2426	0		2227	2227	2236	2227	2251		9037	9037	0	9037	9020		2426	2426	2490	2426	0		2235	2235
9025	9025	0	9025	9033		2427	2427	2489	2427	0		1929	1929	0	1929	1923		9038	9038	0	9038	9019		2427	2427	2489	2427	0		2228	2228	2235	2228	2250		9038	9038	0	9038	9019		2427	2427	2489	2427	0		2236	2236
9026	9026	0	9026	9032		2428	2428	2488	2428	0		1930	1930	0	1930	1922		9039	9039	0	9039	9018		2428	2428	2488	2428	0		2235	2235	2228	2235	0		9039	9039	0	9039	9018		2428	2428	2488	2428	0		2250	2250
9032	9032	0	9032	9026		2429	2429	2487	2429	0		1933	1933	1948	1933	0								2429	2429	2487	2429	0		2236	2236	2227	2236	0								2429	2429	2487	2429	0		2251	2251
9033	9033	0	9033	9025		2487	2487	2429	2487	0		1934	1934	1947	1934	0								2487	2487	2429	2487	0		2250	2250	0	2250	2228								2487	2487	2429	2487	0		2258	2258
9034	9034	0	9034	9023		2488	2488	2428	2488	0		1947	1947	1934	1947	0								2488	2488	2428	2488	0		2251	2251	0	2251	2227								2488	2488	2428	2488	0		2260	2260
9035	9035	0	9035	9022		2489	2489	2427	2489	0		1948	1948	1933	1948	0								2489	2489	2427	2489	0		2258	2258	0	2258	2219								2489	2489	2427	2489	0		2378	2378
9036	9036	0	9036	9021		2490	2490	2426	2490	0		1954	1954	1927	1954	0								2490	2490	2426	2490	0		2260	2260	0	2260	2217								2490	2490	2426	2490	0		2379	2379
9037	9037	0	9037	9020		2491	2491	2425	2491	0		1955	1955	1926	1955	0								2491	2491	2425	2491	0		2378	2378	0	2378	2429								2491	2491	2425	2491	0		2380	2380
9038	9038	0	9038	9019		2498	2498	2418	2498	0		1956	1956	1925	1956	0								2498	2498	2418	2498	0		2379	2379	0	2379	2428								2498	2498	2418	2498	0		2381	2381
9039	9039	0	9039	9018		2499	2499	2417	2499	0		2217	2217	0	2217	2260								2499	2499	2417	2499	0		2380	2380	0	2380	2427								2499	2499	2417	2499	0		2382	2382
						2572	2572	0	2572	2579		2219	2219	0	2219	2258								2572	2572	0	2572	2579		2381	2381	0	2381	2426								2572	2572	0	2572	2579		2394	2394
						2573	2573	0	2573	2578		2227	2227	2236	2227	2251								2573	2573	0	2573	2578		2382	2382	0	2382	2425								2573	2573	0	2573	2578		2413	2413
						2578	2578	0	2578	2573		2228	2228	2235	2228	2250								2578	2578	0	2578	2573		2394	2394	0	2394	2413								2578	2578	0	2578	2573		2417	2417
						2579	2579	0	2579	2572		2235	2235	2228	2235	0								2579	2579	0	2579	2572		2413	2413	0	2413	2394								2579	2579	0	2579	2572		2418	2418
						2778	2778	2805	2778	0		2236	2236	2227	2236	0								2778	2778	2805	2778	0		2417	2417	2499	2417	0								2778	2778	2805	2778	0		2425	2425
						2779	2779	2804	2779	0		2250	2250	0	2250	2228								2779	2779	2804	2779	0		2418	2418	2498	2418	0								2779	2779	2804	2779	0		2426	2426
						2804	2804	2779	2804	0		2251	2251	0	2251	2227								2804	2804	2779	2804	0		2425	2425	2491	2425	2382								2804	2804	2779	2804	0		2427	2427
						2805	2805	2778	2805	0		2258	2258	0	2258	2219								2805	2805	2778	2805	0		2426	2426	2490	2426	2381								2805	2805	2778	2805	0		2428	2428
						3244	3244	0	3244	3256		2260	2260	0	2260	2217								3244	3244	0	3244	3256		2427	2427	2489	2427	2380								3244	3244	0	3244	3256		2429	2429
						3245	3245	0	3245	3255		2378	2378	0	2378	2429								3245	3245	0	3245	3255		2428	2428	2488	2428	2379								3245	3245	0	3245	3255		2487	2487
						3246	3246	0	3246	3254		2379	2379	0	2379	2428								3246	3246	0	3246	3254		2429	2429	2487	2429	2378								3246	3246	0	3246	3254		2488	2488
						3247	3247	0	3247	3253		2380	2380	0	2380	2427								3247	3247	0	3247	3253		2487	2487	2429	2487	0								3247	3247	0	3247	3253		2489	2489
						3253	3253	0	3253	3247		2381	2381	0	2381	2426								3253	3253	0	3253	3247		2488	2488	2428	2488	0								3253	3253	0	3253	3247		2490	2490
						3254	3254	0	3254	3246		2382	2382	0	2382	2425								3254	3254	0	3254	3246		2489	2489	2427	2489	0								3254	3254	0	3254	3246		2491	2491
						3255	3255	0	3255	3245		2394	2394	0	2394	2413								3255	3255	0	3255	3245		2490	2490	2426	2490	0								3255	3255	0	3255	3245		2498	2498
						3256	3256	0	3256	3244		2395	2395	2412	2395	0								3256	3256	0	3256	3244		2491	2491	2425	2491	0								3256	3256	0	3256	3244		2499	2499
						3288	3288	0	3288	3294		2412	2412	2395	2412	0								3288	3288	0	3288	3294		2498	2498	2418	2498	0								3288	3288	0	3288	3294		2559	2559
						3294	3294	0	3294	3288		2413	2413	0	2413	2394								3294	3294	0	3294	3288		2499	2499	2417	2499	0								3294	3294	0	3294	3288		2564	2564
						3915	3915	0	3915	3922		2417	2417	2499	2417	0								3915	3915	0	3915	3922		2559	2559	0	2559	2564								3915	3915	0	3915	3922		2572	2572
						3916	3916	0	3916	3921		2418	2418	2498	2418	0								3916	3916	0	3916	3921		2564	2564	0	2564	2559								3916	3916	0	3916	3921		2579	2579
						3921	3921	0	3921	3916		2425	2425	2491	2425	2382								3921	3921	0	3921	3916		2572	2572	0	2572	2579								3921	3921	0	3921	3916		2778	2778
						3922	3922	0	3922	3915		2426	2426	2490	2426	2381								3922	3922	0	3922	3915		2579	2579	0	2579	2572								3922	3922	0	3922	3915		2779	2779
						4554	4554	0	4554	4603		2427	2427	2489	2427	2380								4554	4554	0	4554	4603		2778	2778	2805	2778	0								4554	4554	0	4554	4603		2804	2804
						4555	4555	0	4555	4602		2428	2428	2488	2428	2379								4555	4555	0	4555	4602		2779	2779	2804	2779	0								4555	4555	0	4555	4602		2805	2805
						4556	4556	0	4556	4601		2429	2429	2487	2429	2378								4556	4556	0	4556	4601		2804	2804	2779	2804	0								4556	4556	0	4556	4601		2849	2849
						4557	4557	0	4557	4600		2487	2487	2429	2487	0								4557	4557	0	4557	4600		2805	2805	2778	2805	0								4557	4557	0	4557	4600		2851	2851
						4558	4558	0	4558	4599		2488	2488	2428	2488	0								4558	4558	0	4558	4599		2849	2849	0	2849	2893								4558	4558	0	4558	4599		2856	2856
						4569	4569	0	4569	4589		2489	2489	2427	2489	0								4569	4569	0	4569	4589		2851	2851	0	2851	2891								4569	4569	0	4569	4589		2888	2888
						4570	4570	0	4570	4588		2490	2490	2426	2490	0								4570	4570	0	4570	4588		2856	2856	0	2856	2888								4570	4570	0	4570	4588		2891	2891
						4573	4573	0	4573	4586		2491	2491	2425	2491	0								4573	4573	0	4573	4586		2867	2867	0	2867	2876								4573	4573	0	4573	4586		2893	2893
						4574	4574	0	4574	4585		2498	2498	2418	2498	0								4574	4574	0	4574	4585		2876	2876	0	2876	2867								4574	4574	0	4574	4585		2935	2935
						4575	4575	0	4575	4584		2499	2499	2417	2499	0								4575	4575	0	4575	4584		2888	2888	0	2888	2856								4575	4575	0	4575	4584		2936	2936
						4576	4576	0	4576	4583		2559	2559	0	2559	2564								4576	4576	0	4576	4583		2891	2891	0	2891	2851								4576	4576	0	4576	4583		2946	2946
						4583	4583	0	4583	4576		2564	2564	0	2564	2559								4583	4583	0	4583	4576		2893	2893	0	2893	2849								4583	4583	0	4583	4576		2947	2947
						4584	4584	0	4584	4575		2778	2778	2805	2778	0								4584	4584	0	4584	4575		2935	2935	2974	2935	0								4584	4584	0	4584	4575		2948	2948
						4585	4585	0	4585	4574		2779	2779	2804	2779	0								4585	4585	0	4585	4574		2936	2936	2973	2936	0								4585	4585	0	4585	4574		2949	2949
						4586	4586	0	4586	4573		2804	2804	2779	2804	0								4586	4586	0	4586	4573		2946	2946	0	2946	3057								4586	4586	0	4586	4573		2972	2972
						4588	4588	0	4588	4570		2805	2805	2778	2805	0								4588	4588	0	4588	4570		2947	2947	3057	2947	3056								4588	4588	0	4588	4570		2973	2973
						4589	4589	0	4589	4569		2849	2849	0	2849	2893								4589	4589	0	4589	4569		2948	2948	3056	2948	3055								4589	4589	0	4589	4569		2974	2974
						4599	4599	0	4599	4558		2851	2851	0	2851	2891								4599	4599	0	4599	4558		2949	2949	3055	2949	0								4599	4599	0	4599	4558		2975	2975
						4600	4600	0	4600	4557		2856	2856	0	2856	2888								4600	4600	0	4600	4557		2972	2972	0	2972	3038								4600	4600	0	4600	4557		2976	2976
						4601	4601	0	4601	4556		2888	2888	0	2888	2856								4601	4601	0	4601	4556		2973	2973	2936	2973	3037								4601	4601	0	4601	4556		2978	2978
						4602	4602	0	4602	4555		2891	2891	0	2891	2851								4602	4602	0	4602	4555		2974	2974	2935	2974	3036								4602	4602	0	4602	4555		2979	2979
						4603	4603	0	4603	4554		2893	2893	0	2893	2849								4603	4603	0	4603	4554		2975	2975	3092	2975	3035								4603	4603	0	4603	4554		2982	2982
						4694	4694	0	4694	4732		2935	2935	2974	2935	0								4694	4694	0	4694	4732		2976	2976	3091	2976	3034								4694	4694	0	4694	4732		2983	2983
						4695	4695	0	4695	4731		2936	2936	2973	2936	0								4695	4695	0	4695	4731		2978	2978	0	2978	3008								4695	4695	0	4695	4731		2984	2984
						4696	4696	0	4696	4730		2946	2946	0	2946	3057								4696	4696	0	4696	4730		2979	2979	0	2979	3007								4696	4696	0	4696	4730		2990	2990
						4698	4698	0	4698	4728		2947	2947	3057	2947	3056								4698	4698	0	4698	4728		2982	2982	0	2982	3004								4698	4698	0	4698	4728		2991	2991
						4699	4699	0	4699	4727		2948	2948	3056	2948	3055								4699	4699	0	4699	4727		2983	2983	0	2983	3003								4699	4699	0	4699	4727		3002	3002
						4700	4700	0	4700	4726		2949	2949	3055	2949	0								4700	4700	0	4700	4726		2984	2984	0	2984	3002								4700	4700	0	4700	4726		3003	3003
						4701	4701	0	4701	4725		2973	2973	2936	2973	3037								4701	4701	0	4701	4725		2990	2990	3100	2990	0								4701	4701	0	4701	4725		3004	3004
						4725	4725	0	4725	4701		2974	2974	2935	2974	3036								4725	4725	0	4725	4701		2991	2991	3099	2991	0								4725	4725	0	4725	4701		3007	3007
						4726	4726	0	4726	4700		2975	2975	3092	2975	3035								4726	4726	0	4726	4700		3002	3002	0	3002	2984								4726	4726	0	4726	4700		3008	3008
						4727	4727	0	4727	4699		2976	2976	3091	2976	3034								4727	4727	0	4727	4699		3003	3003	3102	3003	2983								4727	4727	0	4727	4699		3012	3012
						4728	4728	0	4728	4698		2978	2978	0	2978	3008								4728	4728	0	4728	4698		3004	3004	0	3004	2982								4728	4728	0	4728	4698		3013	3013
						4730	4730	0	4730	4696		2979	2979	0	2979	3007								4730	4730	0	4730	4696		3007	3007	0	3007	2979								4730	4730	0	4730	4696		3034	3034
						4731	4731	0	4731	4695		2982	2982	0	2982	3004								4731	4731	0	4731	4695		3008	3008	0	3008	2978								4731	4731	0	4731	4695		3035	3035
						4732	4732	0	4732	4694		2983	2983	0	2983	3003								4732	4732	0	4732	4694		3012	3012	3036	3012	0								4732	4732	0	4732	4694		3036	3036
						5041	5041	5075	5041	0		2984	2984	0	2984	3002								5041	5041	5075	5041	0		3013	3013	3035	3013	0								5041	5041	5075	5041	0		3037	3037
						5075	5075	5041	5075	0		2990	2990	3100	2990	0								5042	5042	5074	5042	0		3034	3034	0	3034	2976								5075	5075	5041	5075	0		3038	3038
						5146	5146	0	5146	5216		2991	2991	3099	2991	0								5074	5074	5042	5074	0		3035	3035	3013	3035	2975								5146	5146	0	5146	5216		3055	3055
						5155	5155	0	5155	5203		3002	3002	0	3002	2984								5075	5075	5041	5075	0		3036	3036	3012	3036	2974								5147	5147	0	5147	5215		3056	3056
						5156	5156	0	5156	5202		3003	3003	3102	3003	2983								5146	5146	0	5146	5216		3037	3037	0	3037	2973								5155	5155	0	5155	5203		3057	3057
						5157	5157	0	5157	5201		3004	3004	0	3004	2982								5147	5147	0	5147	5215		3038	3038	0	3038	2972								5156	5156	0	5156	5202		3091	3091
						5158	5158	0	5158	5197		3007	3007	0	3007	2979								5155	5155	0	5155	5203		3055	3055	2949	3055	2948								5157	5157	0	5157	5201		3092	3092
						5159	5159	0	5159	5196		3008	3008	0	3008	2978								5156	5156	0	5156	5202		3056	3056	2948	3056	2947								5158	5158	0	5158	5197		3099	3099
						5160	5160	0	5160	5195		3012	3012	3036	3012	0								5157	5157	0	5157	5201		3057	3057	2947	3057	2946								5159	5159	0	5159	5196		3100	3100
						5161	5161	0	5161	5194		3013	3013	3035	3013	0								5158	5158	0	5158	5197		3091	3091	2976	3091	0								5160	5160	0	5160	5195		3101	3101
						5162	5162	0	5162	5192		3034	3034	0	3034	2976								5159	5159	0	5159	5196		3092	3092	2975	3092	0								5161	5161	0	5161	5194		3102	3102
						5163	5163	0	5163	5191		3035	3035	3013	3035	2975								5160	5160	0	5160	5195		3099	3099	2991	3099	0								5162	5162	0	5162	5192		3288	3288
						5191	5191	0	5191	5163		3036	3036	3012	3036	2974								5161	5161	0	5161	5194		3100	3100	2990	3100	0								5163	5163	0	5163	5191		3294	3294
						5192	5192	0	5192	5162		3037	3037	0	3037	2973								5162	5162	0	5162	5192		3102	3102	3003	3102	0								5191	5191	0	5191	5163		3315	3315
						5194	5194	0	5194	5161		3055	3055	2949	3055	2948								5163	5163	0	5163	5191		3288	3288	0	3288	3294								5192	5192	0	5192	5162		3316	3316
						5195	5195	0	5195	5160		3056	3056	2948	3056	2947								5191	5191	0	5191	5163		3294	3294	0	3294	3288								5194	5194	0	5194	5161		3317	3317
						5196	5196	0	5196	5159		3057	3057	2947	3057	2946								5192	5192	0	5192	5162		3315	3315	0	3315	3343								5195	5195	0	5195	5160		3341	3341
						5197	5197	0	5197	5158		3091	3091	2976	3091	0								5194	5194	0	5194	5161		3316	3316	0	3316	3342								5196	5196	0	5196	5159		3342	3342
						5201	5201	0	5201	5157		3092	3092	2975	3092	0								5195	5195	0	5195	5160		3317	3317	0	3317	3341								5197	5197	0	5197	5158		3343	3343
						5202	5202	0	5202	5156		3099	3099	2991	3099	0								5196	5196	0	5196	5159		3341	3341	0	3341	3317								5201	5201	0	5201	5157		3395	3395
						5203	5203	0	5203	5155		3100	3100	2990	3100	0								5197	5197	0	5197	5158		3342	3342	0	3342	3316								5202	5202	0	5202	5156		3396	3396
						5216	5216	0	5216	5146		3102	3102	3003	3102	0								5201	5201	0	5201	5157		3343	3343	0	3343	3315								5203	5203	0	5203	5155		3398	3398
						5314	5314	0	5314	5379		3288	3288	0	3288	3294								5202	5202	0	5202	5156		3395	3395	0	3395	3424								5215	5215	0	5215	5147		3399	3399
						5315	5315	0	5315	5378		3294	3294	0	3294	3288								5203	5203	0	5203	5155		3396	3396	0	3396	3423								5216	5216	0	5216	5146		3417	3417
						5316	5316	0	5316	5377		3315	3315	0	3315	3343								5215	5215	0	5215	5147		3398	3398	0	3398	3418								5314	5314	0	5314	5379		3418	3418
						5319	5319	0	5319	5374		3316	3316	0	3316	3342								5216	5216	0	5216	5146		3399	3399	0	3399	3417								5315	5315	0	5315	5378		3423	3423
						5325	5325	0	5325	5366		3317	3317	0	3317	3341								5314	5314	0	5314	5379		3417	3417	0	3417	3399								5316	5316	0	5316	5377		3424	3424
						5326	5326	0	5326	5365		3341	3341	0	3341	3317								5315	5315	0	5315	5378		3418	3418	0	3418	3398								5319	5319	0	5319	5374		3433	3433
						5365	5365	0	5365	5326		3342	3342	0	3342	3316								5316	5316	0	5316	5377		3423	3423	0	3423	3396								5325	5325	0	5325	5366		3447	3447
						5366	5366	0	5366	5325		3343	3343	0	3343	3315								5319	5319	0	5319	5374		3424	3424	0	3424	3395								5326	5326	0	5326	5365		3448	3448
						5374	5374	0	5374	5319		3373	3373	3393	3373	0								5325	5325	0	5325	5366		3433	3433	3505	3433	0								5365	5365	0	5365	5326		3455	3455
						5377	5377	5445	5377	5316		3393	3393	3373	3393	0								5326	5326	0	5326	5365		3447	3447	3560	3447	0								5366	5366	0	5366	5325		3456	3456
						5378	5378	5444	5378	5315		3395	3395	0	3395	3424								5365	5365	0	5365	5326		3448	3448	3559	3448	0								5374	5374	0	5374	5319		3457	3457
						5379	5379	5443	5379	5314		3396	3396	0	3396	3423								5366	5366	0	5366	5325		3455	3455	3552	3455	0								5377	5377	5445	5377	5316		3459	3459
						5384	5384	0	5384	5438		3398	3398	0	3398	3418								5374	5374	0	5374	5319		3456	3456	3551	3456	0								5378	5378	5444	5378	5315		3460	3460
						5385	5385	0	5385	5437		3399	3399	0	3399	3417								5377	5377	5445	5377	5316		3457	3457	3550	3457	0								5379	5379	5443	5379	5314		3463	3463
						5386	5386	0	5386	5436		3401	3401	0	3401	3415								5378	5378	5444	5378	5315		3459	3459	0	3459	3473								5384	5384	0	5384	5438		3472	3472
						5387	5387	0	5387	5435		3415	3415	0	3415	3401								5379	5379	5443	5379	5314		3460	3460	0	3460	3472								5385	5385	0	5385	5437		3473	3473
						5388	5388	0	5388	5434		3417	3417	0	3417	3399								5384	5384	0	5384	5438		3463	3463	3544	3463	0								5386	5386	0	5386	5436		3485	3485
						5395	5395	0	5395	5428		3418	3418	0	3418	3398								5385	5385	0	5385	5437		3464	3464	3543	3464	0								5387	5387	0	5387	5435		3494	3494
						5397	5397	0	5397	5426		3423	3423	0	3423	3396								5386	5386	0	5386	5436		3472	3472	0	3472	3460								5388	5388	0	5388	5434		3505	3505
						5398	5398	0	5398	5425		3424	3424	0	3424	3395								5387	5387	0	5387	5435		3473	3473	0	3473	3459								5395	5395	0	5395	5428		3529	3529
						5404	5404	0	5404	5419		3433	3433	3505	3433	0								5388	5388	0	5388	5434		3485	3485	3494	3485	0								5397	5397	0	5397	5426		3530	3530
						5405	5405	0	5405	5418		3447	3447	3560	3447	0								5395	5395	0	5395	5428		3494	3494	3485	3494	0								5398	5398	0	5398	5425		3531	3531
						5406	5406	0	5406	5417		3448	3448	3559	3448	0								5397	5397	0	5397	5426		3505	3505	3433	3505	0								5404	5404	0	5404	5419		3538	3538
						5407	5407	0	5407	5416		3455	3455	3552	3455	0								5398	5398	0	5398	5425		3543	3543	3464	3543	0								5405	5405	0	5405	5418		3539	3539
						5408	5408	0	5408	5415		3456	3456	3551	3456	0								5404	5404	0	5404	5419		3544	3544	3463	3544	0								5406	5406	0	5406	5417		3540	3540
						5409	5409	0	5409	5414		3457	3457	3550	3457	0								5405	5405	0	5405	5418		3550	3550	3457	3550	0								5407	5407	0	5407	5416		3544	3544
						5414	5414	0	5414	5409		3458	3458	3468	3458	0								5406	5406	0	5406	5417		3551	3551	3456	3551	0								5408	5408	0	5408	5415		3550	3550
						5415	5415	0	5415	5408		3459	3459	0	3459	3473								5407	5407	0	5407	5416		3552	3552	3455	3552	0								5409	5409	0	5409	5414		3551	3551
						5416	5416	0	5416	5407		3460	3460	0	3460	3472								5408	5408	0	5408	5415		3559	3559	3448	3559	0								5414	5414	0	5414	5409		3552	3552
						5417	5417	0	5417	5406		3463	3463	3544	3463	0								5409	5409	0	5409	5414		3560	3560	3447	3560	0								5415	5415	0	5415	5408		3559	3559
						5418	5418	0	5418	5405		3468	3468	3458	3468	0								5414	5414	0	5414	5409		3566	3566	3608	3566	0								5416	5416	0	5416	5407		3560	3560
						5419	5419	0	5419	5404		3472	3472	0	3472	3460								5415	5415	0	5415	5408		3567	3567	3607	3567	0								5417	5417	0	5417	5406		3566	3566
						5425	5425	0	5425	5398		3473	3473	0	3473	3459								5416	5416	0	5416	5407		3607	3607	3567	3607	0								5418	5418	0	5418	5405		3567	3567
						5426	5426	0	5426	5397		3485	3485	3494	3485	0								5417	5417	0	5417	5406		3608	3608	3566	3608	0								5419	5419	0	5419	5404		3607	3607
						5428	5428	0	5428	5395		3494	3494	3485	3494	0								5418	5418	0	5418	5405		3951	3951	3994	3951	0								5425	5425	0	5425	5398		3608	3608
						5434	5434	0	5434	5388		3505	3505	3433	3505	0								5419	5419	0	5419	5404		3954	3954	4040	3954	0								5426	5426	0	5426	5397		3951	3951
						5435	5435	0	5435	5387		3544	3544	3463	3544	0								5425	5425	0	5425	5398		3991	3991	0	3991	4000								5428	5428	0	5428	5395		3954	3954
						5436	5436	0	5436	5386		3550	3550	3457	3550	0								5426	5426	0	5426	5397		3994	3994	3951	3994	0								5434	5434	0	5434	5388		3991	3991
						5437	5437	0	5437	5385		3551	3551	3456	3551	0								5428	5428	0	5428	5395		4000	4000	0	4000	3991								5435	5435	0	5435	5387		3994	3994
						5438	5438	0	5438	5384		3552	3552	3455	3552	0								5434	5434	0	5434	5388		4040	4040	3954	4040	0								5436	5436	0	5436	5386		4000	4000
						5443	5443	5379	5443	0		3559	3559	3448	3559	0								5435	5435	0	5435	5387		4321	4321	4367	4321	4344								5437	5437	0	5437	5385		4040	4040
						5444	5444	5378	5444	0		3560	3560	3447	3560	0								5436	5436	0	5436	5386		4322	4322	4366	4322	4343								5438	5438	0	5438	5384		4348	4348
						5445	5445	5377	5445	0		3566	3566	3608	3566	0								5437	5437	0	5437	5385		4343	4343	0	4343	4322								5443	5443	5379	5443	0		4401	4401
						5447	5447	0	5447	5458		3567	3567	3607	3567	0								5438	5438	0	5438	5384		4344	4344	0	4344	4321								5444	5444	5378	5444	0		4457	4457
						5448	5448	0	5448	5457		3607	3607	3567	3607	0								5443	5443	5379	5443	0		4348	4348	4401	4348	0								5445	5445	5377	5445	0		4463	4463
						5449	5449	0	5449	5456		3608	3608	3566	3608	0								5444	5444	5378	5444	0		4366	4366	4322	4366	0								5447	5447	0	5447	5458		4464	4464
						5450	5450	0	5450	5455		3951	3951	3994	3951	0								5445	5445	5377	5445	0		4367	4367	4321	4367	0								5448	5448	0	5448	5457		4471	4471
						5455	5455	0	5455	5450		3954	3954	4040	3954	0								5447	5447	0	5447	5458		4401	4401	4348	4401	0								5449	5449	0	5449	5456		4478	4478
						5456	5456	0	5456	5449		3991	3991	0	3991	4000								5448	5448	0	5448	5457		4457	4457	4478	4457	0								5450	5450	0	5450	5455		4486	4486
						5457	5457	0	5457	5448		3994	3994	3951	3994	0								5449	5449	0	5449	5456		4463	4463	4502	4463	0								5455	5455	0	5455	5450		4491	4491
						5458	5458	0	5458	5447		4000	4000	0	4000	3991								5450	5450	0	5450	5455		4464	4464	0	4464	4491								5456	5456	0	5456	5449		4498	4498
						5751	5751	0	5751	5855		4004	4004	4058	4004	0								5455	5455	0	5455	5450		4471	4471	0	4471	4486								5457	5457	0	5457	5448		4502	4502
						5752	5752	0	5752	5854		4005	4005	4057	4005	0								5456	5456	0	5456	5449		4478	4478	4457	4478	0								5458	5458	0	5458	5447		4509	4509
						5854	5854	0	5854	5752		4040	4040	3954	4040	0								5457	5457	0	5457	5448		4486	4486	0	4486	4471								5751	5751	0	5751	5855		5041	5041
						5855	5855	0	5855	5751		4057	4057	4005	4057	0								5458	5458	0	5458	5447		4491	4491	0	4491	4464								5752	5752	0	5752	5854		5075	5075
						6198	6198	0	6198	6257		4058	4058	4004	4058	0								5751	5751	0	5751	5855		4498	4498	4509	4498	0								5854	5854	0	5854	5752		5146	5146
						6201	6201	0	6201	6254		4321	4321	4343	4321	4344								5752	5752	0	5752	5854		4502	4502	4463	4502	0								5855	5855	0	5855	5751		5147	5147
						6254	6254	6304	6254	6201		4322	4322	4342	4322	4343								5854	5854	0	5854	5752		4509	4509	4498	4509	0								6198	6198	0	6198	6257		5215	5215
						6257	6257	6301	6257	6198		4342	4342	4322	4342	0								5855	5855	0	5855	5751		5041	5041	5075	5041	0								6201	6201	0	6201	6254		5216	5216
						6301	6301	6257	6301	0		4343	4343	4321	4343	4322								6198	6198	0	6198	6257		5042	5042	5074	5042	0								6254	6254	6304	6254	6201		5281	5281
						6304	6304	6254	6304	0		4344	4344	0	4344	4321								6201	6201	0	6201	6254		5074	5074	5042	5074	0								6257	6257	6301	6257	6198		5289	5289
						6306	6306	6334	6306	0		4348	4348	4401	4348	0								6254	6254	6304	6254	6201		5075	5075	5041	5075	0								6301	6301	6257	6301	0		5314	5314
						6307	6307	6333	6307	0		4401	4401	4348	4401	0								6257	6257	6301	6257	6198		5146	5146	0	5146	5216								6304	6304	6254	6304	0		5315	5315
						6333	6333	6307	6333	0		4457	4457	4478	4457	0								6301	6301	6257	6301	0		5147	5147	0	5147	5215								6307	6307	6333	6307	0		5316	5316
						6334	6334	6306	6334	0		4463	4463	4502	4463	0								6304	6304	6254	6304	0		5215	5215	0	5215	5147								6333	6333	6307	6333	0		5319	5319
						6409	6409	6495	6409	0		4464	4464	0	4464	4491								6307	6307	6333	6307	0		5216	5216	0	5216	5146								6409	6409	6495	6409	0		5374	5374
						6410	6410	6494	6410	0		4471	4471	0	4471	4486								6333	6333	6307	6333	0		5281	5281	5289	5281	0								6410	6410	6494	6410	0		5377	5377
						6411	6411	6493	6411	0		4478	4478	4457	4478	0								6409	6409	6495	6409	0		5289	5289	5281	5289	0								6411	6411	6493	6411	0		5378	5378
						6493	6493	6411	6493	0		4486	4486	0	4486	4471								6410	6410	6494	6410	0		5314	5314	0	5314	5379								6493	6493	6411	6493	0		5379	5379
						6494	6494	6410	6494	0		4491	4491	0	4491	4464								6411	6411	6493	6411	0		5315	5315	0	5315	5378								6494	6494	6410	6494	0		5443	5443
						6495	6495	6409	6495	0		4498	4498	4509	4498	0								6493	6493	6411	6493	0		5316	5316	0	5316	5377								6495	6495	6409	6495	0		5444	5444
						6983	6983	7079	6983	0		4502	4502	4463	4502	0								6494	6494	6410	6494	0		5319	5319	0	5319	5374								6984	6984	7078	6984	0		5445	5445
						6984	6984	7078	6984	0		4509	4509	4498	4509	0								6495	6495	6409	6495	0		5374	5374	0	5374	5319								6985	6985	7077	6985	0		5553	5553
						6985	6985	7077	6985	0		5041	5041	5075	5041	0								6984	6984	7078	6984	0		5377	5377	5445	5377	5316								6989	6989	7073	6989	0		5565	5565
						6989	6989	7073	6989	0		5075	5075	5041	5075	0								6985	6985	7077	6985	0		5378	5378	5444	5378	5315								7050	7050	7071	7050	0		5567	5567
						7050	7050	7071	7050	0		5146	5146	0	5146	5216								6989	6989	7073	6989	0		5379	5379	5443	5379	5314								7051	7051	7070	7051	0		5570	5570
						7051	7051	7070	7051	0		5216	5216	0	5216	5146								7050	7050	7071	7050	0		5443	5443	5379	5443	0								7052	7052	7069	7052	0		5579	5579
						7052	7052	7069	7052	0		5281	5281	5289	5281	0								7051	7051	7070	7051	0		5444	5444	5378	5444	0								7069	7069	7052	7069	7175		5594	5594
						7069	7069	7052	7069	7175		5289	5289	5281	5289	0								7052	7052	7069	7052	0		5445	5445	5377	5445	0								7070	7070	7051	7070	7174		5621	5621
						7070	7070	7051	7070	7174		5314	5314	0	5314	5379								7069	7069	7052	7069	7175		5553	5553	5669	5553	0								7071	7071	7050	7071	7173		5638	5638
						7071	7071	7050	7071	7173		5315	5315	0	5315	5378								7070	7070	7051	7070	7174		5565	5565	5570	5565	0								7073	7073	6989	7073	7171		5669	5669
						7073	7073	6989	7073	7171		5316	5316	0	5316	5377								7071	7071	7050	7071	7173		5567	5567	5594	5567	0								7077	7077	6985	7077	0		5696	5696
						7077	7077	6985	7077	0		5319	5319	0	5319	5374								7073	7073	6989	7073	7171		5570	5570	5565	5570	0								7078	7078	6984	7078	0		5753	5753
						7078	7078	6984	7078	0		5374	5374	0	5374	5319								7077	7077	6985	7077	0		5579	5579	5696	5579	0								7171	7171	0	7171	7073		5853	5853
						7079	7079	6983	7079	0		5377	5377	5445	5377	5316								7078	7078	6984	7078	0		5594	5594	5567	5594	0								7173	7173	0	7173	7071		6048	6048
						7171	7171	0	7171	7073		5378	5378	5444	5378	5315								7171	7171	0	7171	7073		5621	5621	0	5621	5638								7174	7174	0	7174	7070		6049	6049
						7173	7173	0	7173	7071		5379	5379	5443	5379	5314								7173	7173	0	7173	7071		5638	5638	0	5638	5621								7175	7175	0	7175	7069		6050	6050
						7174	7174	0	7174	7070		5443	5443	5379	5443	0								7174	7174	0	7174	7070		5669	5669	5553	5669	0								7290	7290	0	7290	7328		6051	6051
						7175	7175	0	7175	7069		5444	5444	5378	5444	0								7175	7175	0	7175	7069		5696	5696	5579	5696	0								7291	7291	0	7291	7327		6052	6052
						7290	7290	0	7290	7328		5445	5445	5377	5445	0								7290	7290	0	7290	7328		5753	5753	5853	5753	0								7292	7292	0	7292	7326		6062	6062
						7291	7291	0	7291	7327		5553	5553	5669	5553	0								7291	7291	0	7291	7327		5853	5853	5753	5853	0								7293	7293	0	7293	7325		6063	6063
						7292	7292	0	7292	7326		5565	5565	5570	5565	0								7292	7292	0	7292	7326		6048	6048	0	6048	6066								7294	7294	0	7294	7324		6064	6064
						7293	7293	0	7293	7325		5567	5567	5594	5567	0								7293	7293	0	7293	7325		6049	6049	0	6049	6065								7295	7295	0	7295	7323		6065	6065
						7294	7294	0	7294	7324		5570	5570	5565	5570	0								7294	7294	0	7294	7324		6050	6050	0	6050	6064								7299	7299	0	7299	7319		6066	6066
						7295	7295	0	7295	7323		5579	5579	5696	5579	0								7295	7295	0	7295	7323		6051	6051	0	6051	6063								7300	7300	0	7300	7318		6083	6083
						7299	7299	0	7299	7319		5594	5594	5567	5594	0								7299	7299	0	7299	7319		6052	6052	0	6052	6062								7301	7301	0	7301	7317		6089	6089
						7300	7300	0	7300	7318		5621	5621	0	5621	5638								7300	7300	0	7300	7318		6062	6062	0	6062	6052								7302	7302	0	7302	7316		6090	6090
						7301	7301	0	7301	7317		5638	5638	0	5638	5621								7301	7301	0	7301	7317		6063	6063	0	6063	6051								7303	7303	0	7303	7315		6091	6091
						7302	7302	0	7302	7316		5669	5669	5553	5669	0								7302	7302	0	7302	7316		6064	6064	0	6064	6050								7304	7304	0	7304	7314		6092	6092
						7303	7303	0	7303	7315		5696	5696	5579	5696	0								7303	7303	0	7303	7315		6065	6065	0	6065	6049								7305	7305	0	7305	7313		6097	6097
						7304	7304	0	7304	7314		5753	5753	5853	5753	0								7304	7304	0	7304	7314		6066	6066	0	6066	6048								7306	7306	0	7306	7312		6098	6098
						7305	7305	0	7305	7313		5853	5853	5753	5853	0								7305	7305	0	7305	7313		6083	6083	6105	6083	6092								7312	7312	0	7312	7306		6099	6099
						7306	7306	0	7306	7312		5918	5918	0	5918	5927								7306	7306	0	7306	7312		6089	6089	0	6089	6099								7313	7313	0	7313	7305		6105	6105
						7312	7312	0	7312	7306		5927	5927	0	5927	5918								7312	7312	0	7312	7306		6090	6090	0	6090	6098								7314	7314	0	7314	7304		6198	6198
						7313	7313	0	7313	7305		6048	6048	0	6048	6066								7313	7313	0	7313	7305		6091	6091	0	6091	6097								7315	7315	0	7315	7303		6201	6201
						7314	7314	0	7314	7304		6049	6049	0	6049	6065								7314	7314	0	7314	7304		6092	6092	0	6092	6083								7316	7316	0	7316	7302		6254	6254
						7315	7315	0	7315	7303		6050	6050	0	6050	6064								7315	7315	0	7315	7303		6097	6097	0	6097	6091								7317	7317	0	7317	7301		6257	6257
						7316	7316	0	7316	7302		6051	6051	0	6051	6063								7316	7316	0	7316	7302		6098	6098	0	6098	6090								7318	7318	0	7318	7300		6301	6301
						7317	7317	0	7317	7301		6052	6052	0	6052	6062								7317	7317	0	7317	7301		6099	6099	0	6099	6089								7319	7319	0	7319	7299		6304	6304
						7318	7318	0	7318	7300		6062	6062	0	6062	6052								7318	7318	0	7318	7300		6105	6105	6083	6105	0								7323	7323	0	7323	7295		6307	6307
						7319	7319	0	7319	7299		6063	6063	0	6063	6051								7319	7319	0	7319	7299		6198	6198	0	6198	6257								7324	7324	0	7324	7294		6333	6333
						7323	7323	0	7323	7295		6064	6064	0	6064	6050								7323	7323	0	7323	7295		6201	6201	0	6201	6254								7325	7325	0	7325	7293		6409	6409
						7324	7324	0	7324	7294		6065	6065	0	6065	6049								7324	7324	0	7324	7294		6254	6254	6304	6254	6201								7326	7326	0	7326	7292		6410	6410
						7325	7325	0	7325	7293		6066	6066	0	6066	6048								7325	7325	0	7325	7293		6257	6257	6301	6257	6198								7327	7327	0	7327	7291		6411	6411
						7326	7326	0	7326	7292		6083	6083	6105	6083	6092								7326	7326	0	7326	7292		6301	6301	6257	6301	0								7328	7328	0	7328	7290		6426	6426
						7327	7327	0	7327	7291		6089	6089	0	6089	6099								7327	7327	0	7327	7291		6304	6304	6254	6304	0								7514	7514	0	7514	7528		6471	6471
						7328	7328	0	7328	7290		6090	6090	0	6090	6098								7328	7328	0	7328	7290		6307	6307	6333	6307	0								7528	7528	0	7528	7514		6493	6493
						7779	7779	7885	7779	0		6091	6091	0	6091	6097								7514	7514	0	7514	7528		6333	6333	6307	6333	0								7779	7779	7885	7779	0		6494	6494
						7780	7780	7884	7780	0		6092	6092	0	6092	6083								7528	7528	0	7528	7514		6409	6409	6495	6409	0								7780	7780	7884	7780	0		6495	6495
						7799	7799	0	7799	7865		6097	6097	0	6097	6091								7779	7779	7885	7779	0		6410	6410	6494	6410	0								7799	7799	0	7799	7865		6601	6601
						7800	7800	0	7800	7864		6098	6098	0	6098	6090								7780	7780	7884	7780	0		6411	6411	6493	6411	0								7800	7800	0	7800	7864		6602	6602
						7801	7801	0	7801	7863		6099	6099	0	6099	6089								7799	7799	0	7799	7865		6426	6426	6471	6426	0								7801	7801	0	7801	7863		6616	6616
						7802	7802	0	7802	7862		6105	6105	6083	6105	0								7800	7800	0	7800	7864		6471	6471	6426	6471	0								7802	7802	0	7802	7862		6617	6617
						7803	7803	0	7803	7861		6198	6198	0	6198	6257								7801	7801	0	7801	7863		6493	6493	6411	6493	0								7803	7803	0	7803	7861		6656	6656
						7804	7804	0	7804	7860		6201	6201	0	6201	6254								7802	7802	0	7802	7862		6494	6494	6410	6494	0								7804	7804	0	7804	7860		6666	6666
						7806	7806	0	7806	7856		6254	6254	6304	6254	6201								7803	7803	0	7803	7861		6495	6495	6409	6495	0								7806	7806	0	7806	7856		6679	6679
						7807	7807	0	7807	7855		6257	6257	6301	6257	6198								7804	7804	0	7804	7860		6601	6601	0	6601	6617								7807	7807	0	7807	7855		6680	6680
						7808	7808	0	7808	7854		6301	6301	6257	6301	0								7806	7806	0	7806	7856		6602	6602	0	6602	6616								7808	7808	0	7808	7854		6705	6705
						7809	7809	0	7809	7853		6304	6304	6254	6304	0								7807	7807	0	7807	7855		6616	6616	0	6616	6602								7809	7809	0	7809	7853		6707	6707
						7810	7810	0	7810	7852		6306	6306	6334	6306	0								7808	7808	0	7808	7854		6617	6617	0	6617	6601								7810	7810	0	7810	7852		6708	6708
						7811	7811	0	7811	7851		6307	6307	6333	6307	0								7809	7809	0	7809	7853		6656	6656	6774	6656	0								7811	7811	0	7811	7851		6709	6709
						7812	7812	0	7812	7850		6333	6333	6307	6333	0								7810	7810	0	7810	7852		6666	6666	6763	6666	0								7812	7812	0	7812	7850		6711	6711
						7813	7813	0	7813	7849		6334	6334	6306	6334	0								7811	7811	0	7811	7851		6679	6679	6794	6679	0								7813	7813	0	7813	7849		6721	6721
						7814	7814	0	7814	7848		6409	6409	6495	6409	0								7812	7812	0	7812	7850		6680	6680	6793	6680	0								7814	7814	0	7814	7848		6736	6736
						7815	7815	0	7815	7847		6410	6410	6494	6410	0								7813	7813	0	7813	7849		6705	6705	0	6705	6798								7815	7815	0	7815	7847		6737	6737
						7817	7817	0	7817	7845		6411	6411	6493	6411	0								7814	7814	0	7814	7848		6707	6707	6764	6707	0								7817	7817	0	7817	7845		6738	6738
						7818	7818	0	7818	7844		6426	6426	6471	6426	0								7815	7815	0	7815	7847		6708	6708	0	6708	6794								7818	7818	0	7818	7844		6748	6748
						7819	7819	0	7819	7843		6471	6471	6426	6471	0								7817	7817	0	7817	7845		6709	6709	0	6709	6793								7819	7819	0	7819	7843		6756	6756
						7823	7823	0	7823	7839		6493	6493	6411	6493	0								7818	7818	0	7818	7844		6711	6711	0	6711	6791								7823	7823	0	7823	7839		6757	6757
						7824	7824	0	7824	7838		6494	6494	6410	6494	0								7819	7819	0	7819	7843		6721	6721	0	6721	6748								7824	7824	0	7824	7838		6758	6758
						7826	7826	0	7826	7836		6495	6495	6409	6495	0								7823	7823	0	7823	7839		6736	6736	0	6736	6758								7826	7826	0	7826	7836		6763	6763
						7827	7827	0	7827	7835		6601	6601	0	6601	6617								7824	7824	0	7824	7838		6737	6737	6855	6737	6757								7827	7827	0	7827	7835		6764	6764
						7828	7828	0	7828	7834		6602	6602	0	6602	6616								7826	7826	0	7826	7836		6738	6738	0	6738	6756								7828	7828	0	7828	7834		6765	6765
						7829	7829	0	7829	7833		6616	6616	0	6616	6602								7827	7827	0	7827	7835		6748	6748	0	6748	6721								7829	7829	0	7829	7833		6774	6774
						7833	7833	0	7833	7829		6617	6617	0	6617	6601								7828	7828	0	7828	7834		6756	6756	0	6756	6738								7833	7833	0	7833	7829		6779	6779
						7834	7834	0	7834	7828		6656	6656	6774	6656	0								7829	7829	0	7829	7833		6757	6757	0	6757	6737								7834	7834	0	7834	7828		6785	6785
						7835	7835	0	7835	7827		6666	6666	6763	6666	0								7833	7833	0	7833	7829		6758	6758	6808	6758	6736								7835	7835	0	7835	7827		6787	6787
						7836	7836	0	7836	7826		6679	6679	6794	6679	0								7834	7834	0	7834	7828		6763	6763	6666	6763	0								7836	7836	0	7836	7826		6788	6788
						7838	7838	0	7838	7824		6680	6680	6793	6680	0								7835	7835	0	7835	7827		6764	6764	6707	6764	0								7838	7838	0	7838	7824		6789	6789
						7839	7839	0	7839	7823		6691	6691	0	6691	6783								7836	7836	0	7836	7826		6765	6765	6798	6765	0								7839	7839	0	7839	7823		6790	6790
						7843	7843	0	7843	7819		6704	6704	0	6704	6767								7838	7838	0	7838	7824		6774	6774	6656	6774	0								7843	7843	0	7843	7819		6791	6791
						7844	7844	0	7844	7818		6705	6705	0	6705	6798								7839	7839	0	7839	7823		6779	6779	6896	6779	0								7844	7844	0	7844	7818		6792	6792
						7845	7845	0	7845	7817		6707	6707	6764	6707	0								7843	7843	0	7843	7819		6785	6785	6889	6785	0								7845	7845	0	7845	7817		6793	6793
						7847	7847	0	7847	7815		6708	6708	0	6708	6794								7844	7844	0	7844	7818		6786	6786	6888	6786	0								7847	7847	0	7847	7815		6794	6794
						7848	7848	0	7848	7814		6709	6709	0	6709	6793								7845	7845	0	7845	7817		6787	6787	6887	6787	0								7848	7848	0	7848	7814		6796	6796
						7849	7849	0	7849	7813		6711	6711	0	6711	6791								7847	7847	0	7847	7815		6788	6788	6886	6788	0								7849	7849	0	7849	7813		6797	6797
						7850	7850	0	7850	7812		6721	6721	0	6721	6748								7848	7848	0	7848	7814		6789	6789	6885	6789	0								7850	7850	0	7850	7812		6798	6798
						7851	7851	0	7851	7811		6736	6736	0	6736	6758								7849	7849	0	7849	7813		6790	6790	6884	6790	0								7851	7851	0	7851	7811		6808	6808
						7852	7852	0	7852	7810		6737	6737	6855	6737	6757								7850	7850	0	7850	7812		6791	6791	0	6791	6711								7852	7852	0	7852	7810		6832	6832
						7853	7853	0	7853	7809		6738	6738	0	6738	6756								7851	7851	0	7851	7811		6792	6792	6882	6792	0								7853	7853	0	7853	7809		6836	6836
						7854	7854	0	7854	7808		6748	6748	0	6748	6721								7852	7852	0	7852	7810		6793	6793	6680	6793	6709								7854	7854	0	7854	7808		6841	6841
						7855	7855	0	7855	7807		6756	6756	0	6756	6738								7853	7853	0	7853	7809		6794	6794	6679	6794	6708								7855	7855	0	7855	7807		6855	6855
						7856	7856	0	7856	7806		6757	6757	0	6757	6737								7854	7854	0	7854	7808		6796	6796	6880	6796	0								7856	7856	0	7856	7806		6867	6867
						7860	7860	0	7860	7804		6758	6758	6808	6758	6736								7855	7855	0	7855	7807		6797	6797	6879	6797	0								7860	7860	0	7860	7804		6869	6869
						7861	7861	0	7861	7803		6760	6760	6806	6760	0								7856	7856	0	7856	7806		6798	6798	6765	6798	6705								7861	7861	0	7861	7803		6870	6870
						7862	7862	0	7862	7802		6763	6763	6666	6763	0								7860	7860	0	7860	7804		6808	6808	6758	6808	0								7862	7862	0	7862	7802		6871	6871
						7863	7863	0	7863	7801		6764	6764	6707	6764	0								7861	7861	0	7861	7803		6832	6832	6875	6832	0								7863	7863	0	7863	7801		6872	6872
						7864	7864	0	7864	7800		6765	6765	6798	6765	0								7862	7862	0	7862	7802		6836	6836	6871	6836	0								7864	7864	0	7864	7800		6873	6873
						7865	7865	0	7865	7799		6767	6767	0	6767	6704								7863	7863	0	7863	7801		6840	6840	6868	6840	0								7865	7865	0	7865	7799		6874	6874
						7884	7884	7780	7884	0		6770	6770	6783	6770	0								7864	7864	0	7864	7800		6841	6841	6867	6841	0								7884	7884	7780	7884	0		6875	6875
						7885	7885	7779	7885	0		6774	6774	6656	6774	0								7865	7865	0	7865	7799		6853	6853	0	6853	6858								7885	7885	7779	7885	0		6879	6879
						8525	8525	0	8525	8549		6783	6783	6770	6783	6691								7884	7884	7780	7884	0		6855	6855	6737	6855	0								8456	8456	0	8456	8504		6880	6880
						8526	8526	0	8526	8548		6791	6791	0	6791	6711								7885	7885	7779	7885	0		6858	6858	0	6858	6853								8504	8504	0	8504	8456		6881	6881
						8527	8527	0	8527	8547		6793	6793	6680	6793	6709								8456	8456	0	8456	8504		6867	6867	6841	6867	0								8525	8525	0	8525	8549		6882	6882
						8528	8528	0	8528	8546		6794	6794	6679	6794	6708								8504	8504	0	8504	8456		6868	6868	6840	6868	6888								8526	8526	0	8526	8548		6883	6883
						8546	8546	0	8546	8528		6796	6796	6880	6796	0								8525	8525	0	8525	8549		6869	6869	0	6869	6887								8527	8527	0	8527	8547		6884	6884
						8547	8547	0	8547	8527		6797	6797	6879	6797	0								8526	8526	0	8526	8548		6870	6870	0	6870	6886								8528	8528	0	8528	8546		6885	6885
						8548	8548	0	8548	8526		6798	6798	6765	6798	6705								8527	8527	0	8527	8547		6871	6871	6836	6871	6885								8546	8546	0	8546	8528		6886	6886
						8549	8549	8585	8549	8525		6806	6806	6760	6806	0								8528	8528	0	8528	8546		6872	6872	0	6872	6884								8547	8547	0	8547	8527		6887	6887
						8550	8550	8584	8550	0		6808	6808	6758	6808	0								8546	8546	0	8546	8528		6873	6873	0	6873	6883								8548	8548	0	8548	8526		6889	6889
						8551	8551	8583	8551	0		6841	6841	6867	6841	0								8547	8547	0	8547	8527		6874	6874	0	6874	6882								8549	8549	0	8549	8525		6893	6893
						8555	8555	0	8555	8579		6853	6853	0	6853	6858								8548	8548	0	8548	8526		6875	6875	6832	6875	6881								8553	8553	0	8553	8581		6894	6894
						8556	8556	0	8556	8578		6855	6855	6737	6855	0								8549	8549	0	8549	8525		6879	6879	6797	6879	0								8555	8555	0	8555	8579		6895	6895
						8557	8557	0	8557	8577		6858	6858	0	6858	6853								8553	8553	0	8553	8581		6880	6880	6796	6880	0								8556	8556	0	8556	8578		6896	6896
						8558	8558	0	8558	8576		6867	6867	6841	6867	0								8555	8555	0	8555	8579		6881	6881	0	6881	6875								8557	8557	0	8557	8577		6897	6897
						8559	8559	0	8559	8574		6879	6879	6797	6879	0								8556	8556	0	8556	8578		6882	6882	6792	6882	6874								8558	8558	0	8558	8576		6898	6898
						8560	8560	0	8560	8573		6880	6880	6796	6880	0								8557	8557	0	8557	8577		6883	6883	0	6883	6873								8559	8559	0	8559	8574		6899	6899
						8561	8561	0	8561	8572		6893	6893	0	6893	6912								8558	8558	0	8558	8576		6884	6884	6790	6884	6872								8560	8560	0	8560	8573		6900	6900
						8562	8562	0	8562	8571		6894	6894	0	6894	6911								8559	8559	0	8559	8574		6885	6885	6789	6885	6871								8561	8561	0	8561	8572		6905	6905
						8571	8571	0	8571	8562		6895	6895	0	6895	6910								8560	8560	0	8560	8573		6886	6886	6788	6886	6870								8562	8562	0	8562	8571		6906	6906
						8572	8572	0	8572	8561		6896	6896	0	6896	6909								8561	8561	0	8561	8572		6887	6887	6787	6887	6869								8571	8571	0	8571	8562		6907	6907
						8573	8573	0	8573	8560		6897	6897	0	6897	6908								8562	8562	0	8562	8571		6888	6888	6786	6888	6868								8572	8572	0	8572	8561		6908	6908
						8574	8574	0	8574	8559		6898	6898	0	6898	6907								8571	8571	0	8571	8562		6889	6889	6785	6889	0								8573	8573	0	8573	8560		6909	6909
						8576	8576	0	8576	8558		6899	6899	0	6899	6906								8572	8572	0	8572	8561		6893	6893	0	6893	6912								8574	8574	0	8574	8559		6910	6910
						8577	8577	0	8577	8557		6900	6900	0	6900	6905								8573	8573	0	8573	8560		6894	6894	0	6894	6911								8576	8576	0	8576	8558		6911	6911
						8578	8578	0	8578	8556		6905	6905	0	6905	6900								8574	8574	0	8574	8559		6895	6895	0	6895	6910								8577	8577	0	8577	8557		6912	6912
						8579	8579	0	8579	8555		6906	6906	0	6906	6899								8576	8576	0	8576	8558		6896	6896	6779	6896	6909								8578	8578	0	8578	8556		6984	6984
						8583	8583	8551	8583	0		6907	6907	0	6907	6898								8577	8577	0	8577	8557		6897	6897	0	6897	6908								8579	8579	0	8579	8555		6985	6985
						8584	8584	8550	8584	0		6908	6908	0	6908	6897								8578	8578	0	8578	8556		6898	6898	0	6898	6907								8581	8581	0	8581	8553		6989	6989
						8585	8585	8549	8585	0		6909	6909	0	6909	6896								8579	8579	0	8579	8555		6899	6899	0	6899	6906								8652	8652	8694	8652	8662		7050	7050
						8799	8799	0	8799	8808		6910	6910	0	6910	6895								8581	8581	0	8581	8553		6900	6900	0	6900	6905								8653	8653	8693	8653	8661		7051	7051
						8800	8800	0	8800	8807		6911	6911	0	6911	6894								8652	8652	8694	8652	8662		6905	6905	0	6905	6900								8654	8654	8692	8654	8660		7052	7052
						8807	8807	0	8807	8800		6912	6912	0	6912	6893								8653	8653	8693	8653	8661		6906	6906	0	6906	6899								8660	8660	8687	8660	8654		7069	7069
						8808	8808	0	8808	8799		6983	6983	7079	6983	0								8654	8654	8692	8654	8660		6907	6907	0	6907	6898								8661	8661	0	8661	8653		7070	7070
						8858	8858	0	8858	8972		6984	6984	7078	6984	0								8660	8660	8687	8660	8654		6908	6908	0	6908	6897								8662	8662	0	8662	8652		7071	7071
						8860	8860	0	8860	8970		6985	6985	7077	6985	0								8661	8661	0	8661	8653		6909	6909	0	6909	6896								8687	8687	8660	8687	0		7073	7073
						8970	8970	0	8970	8860		6989	6989	7073	6989	0								8662	8662	0	8662	8652		6910	6910	0	6910	6895								8692	8692	8654	8692	0		7077	7077
						8972	8972	0	8972	8858		7050	7050	7071	7050	0								8687	8687	8660	8687	0		6911	6911	0	6911	6894								8693	8693	8653	8693	0		7078	7078
												7051	7051	7070	7051	0								8692	8692	8654	8692	0		6912	6912	0	6912	6893								8694	8694	8652	8694	0		7171	7171
												7052	7052	7069	7052	0								8693	8693	8653	8693	0		6984	6984	7078	6984	0								8799	8799	0	8799	8808		7173	7173
												7069	7069	7052	7069	7175								8694	8694	8652	8694	0		6985	6985	7077	6985	0								8800	8800	0	8800	8807		7174	7174
												7070	7070	7051	7070	7174								8799	8799	0	8799	8808		6989	6989	7073	6989	0								8807	8807	0	8807	8800		7175	7175
												7071	7071	7050	7071	7173								8800	8800	0	8800	8807		7050	7050	7071	7050	0								8808	8808	0	8808	8799		7514	7514
												7073	7073	6989	7073	7171								8807	8807	0	8807	8800		7051	7051	7070	7051	0								8857	8857	0	8857	8973		7528	7528
												7077	7077	6985	7077	0								8808	8808	0	8808	8799		7052	7052	7069	7052	0								8858	8858	0	8858	8972		7615	7615
												7078	7078	6984	7078	0								8857	8857	0	8857	8973		7069	7069	7052	7069	7175								8860	8860	0	8860	8970		7616	7616
												7079	7079	6983	7079	7099								8858	8858	0	8858	8972		7070	7070	7051	7070	7174								8970	8970	0	8970	8860		7668	7668
												7099	7099	0	7099	7079								8860	8860	0	8860	8970		7071	7071	7050	7071	7173								8972	8972	0	8972	8858		7670	7670
												7171	7171	0	7171	7073								8970	8970	0	8970	8860		7073	7073	6989	7073	7171								8973	8973	0	8973	8857		7671	7671
												7173	7173	0	7173	7071								8972	8972	0	8972	8858		7077	7077	6985	7077	0														7705	7705
												7174	7174	0	7174	7070								8973	8973	0	8973	8857		7078	7078	6984	7078	0														7713	7713
												7175	7175	0	7175	7069														7171	7171	0	7171	7073														7715	7715
												7253	7253	0	7253	7275														7173	7173	0	7173	7071														7716	7716
												7275	7275	0	7275	7253														7174	7174	0	7174	7070														7717	7717
												7615	7615	0	7615	7716														7175	7175	0	7175	7069														7759	7759
												7616	7616	0	7616	7715														7514	7514	0	7514	7528														7763	7763
												7670	7670	7773	7670	0														7528	7528	0	7528	7514														7768	7768
												7671	7671	7772	7671	0														7615	7615	0	7615	7716														7770	7770
												7705	7705	7770	7705	0														7616	7616	0	7616	7715														7772	7772
												7713	7713	7763	7713	0														7668	7668	7775	7668	0														7773	7773
												7715	7715	0	7715	7616														7670	7670	7773	7670	0														7775	7775
												7716	7716	0	7716	7615														7671	7671	7772	7671	0														7779	7779
												7717	7717	7759	7717	0														7705	7705	7770	7705	0														7780	7780
												7759	7759	7717	7759	0														7713	7713	7763	7713	0														7783	7783
												7763	7763	7713	7763	0														7715	7715	0	7715	7616														7790	7790
												7766	7766	7785	7766	0														7716	7716	0	7716	7615														7791	7791
												7767	7767	7784	7767	0														7717	7717	7759	7717	0														7792	7792
												7768	7768	7783	7768	0														7759	7759	7717	7759	0														7794	7794
												7770	7770	7705	7770	0														7763	7763	7713	7763	0														7797	7797
												7772	7772	7671	7772	0														7768	7768	7783	7768	0														7798	7798
												7773	7773	7670	7773	0														7770	7770	7705	7770	0														7870	7870
												7779	7779	7885	7779	0														7772	7772	7671	7772	0														7871	7871
												7780	7780	7884	7780	0														7773	7773	7670	7773	0														7874	7874
												7783	7783	7768	7783	0														7775	7775	7668	7775	0														7876	7876
												7784	7784	7767	7784	0														7779	7779	7885	7779	0														7877	7877
												7785	7785	7766	7785	0														7780	7780	7884	7780	0														7878	7878
												7790	7790	7878	7790	0														7783	7783	7768	7783	0														7884	7884
												7791	7791	7877	7791	0														7790	7790	7878	7790	0														7885	7885
												7792	7792	7876	7792	0														7791	7791	7877	7791	0														7925	7925
												7797	7797	7871	7797	0														7792	7792	7876	7792	0														7974	7974
												7798	7798	7870	7798	0														7794	7794	7874	7794	0														7976	7976
												7870	7870	7798	7870	7878														7797	7797	7871	7797	0														7977	7977
												7871	7871	7797	7871	7877														7798	7798	7870	7798	0														7978	7978
												7876	7876	7792	7876	0														7870	7870	7798	7870	7878														7981	7981
												7877	7877	7791	7877	7871														7871	7871	7797	7871	7877														8016	8016
												7878	7878	7790	7878	7870														7874	7874	7794	7874	0														8017	8017
												7884	7884	7780	7884	0														7876	7876	7792	7876	0														8030	8030
												7885	7885	7779	7885	0														7877	7877	7791	7877	7871														8053	8053
												7925	7925	8030	7925	0														7878	7878	7790	7878	7870														8056	8056
												7974	7974	8062	7974	0														7884	7884	7780	7884	0														8062	8062
												7976	7976	8017	7976	0														7885	7885	7779	7885	0														8106	8106
												7977	7977	8016	7977	0														7925	7925	8030	7925	0														8125	8125
												7978	7978	8056	7978	0														7974	7974	8062	7974	0														8130	8130
												8016	8016	7977	8016	0														7976	7976	8017	7976	0														8131	8131
												8017	8017	7976	8017	0														7977	7977	8016	7977	0														8135	8135
												8030	8030	7925	8030	0														7978	7978	8056	7978	0														8136	8136
												8056	8056	7978	8056	0														7981	7981	8053	7981	0														8192	8192
												8062	8062	7974	8062	0														8016	8016	7977	8016	0														8193	8193
												8106	8106	8211	8106	0														8017	8017	7976	8017	0														8194	8194
												8125	8125	0	8125	8205														8030	8030	7925	8030	0														8195	8195
												8130	8130	8136	8130	0														8053	8053	7981	8053	0														8205	8205
												8131	8131	8135	8131	0														8056	8056	7978	8056	0														8211	8211
												8135	8135	8131	8135	0														8062	8062	7974	8062	0														8236	8236
												8136	8136	8130	8136	0														8106	8106	8211	8106	0														8237	8237
												8192	8192	8239	8192	0														8125	8125	0	8125	8205														8238	8238
												8193	8193	8238	8193	0														8130	8130	8136	8130	0														8239	8239
												8194	8194	8237	8194	0														8131	8131	8135	8131	0														8311	8311
												8195	8195	8236	8195	0														8135	8135	8131	8135	0														8354	8354
												8205	8205	0	8205	8125														8136	8136	8130	8136	0														8456	8456
												8211	8211	8106	8211	0														8192	8192	8239	8192	0														8504	8504
												8236	8236	8195	8236	0														8193	8193	8238	8193	0														8652	8652
												8237	8237	8194	8237	0														8194	8194	8237	8194	0														8653	8653
												8238	8238	8193	8238	0														8195	8195	8236	8195	0														8654	8654
												8239	8239	8192	8239	0														8205	8205	0	8205	8125														8660	8660
												8311	8311	8354	8311	0														8211	8211	8106	8211	0														8661	8661
												8354	8354	8311	8354	0														8236	8236	8195	8236	0														8662	8662
												8525	8525	0	8525	8549														8237	8237	8194	8237	0														8687	8687
												8549	8549	8585	8549	8525														8238	8238	8193	8238	0														8692	8692
												8550	8550	8584	8550	0														8239	8239	8192	8239	0														8693	8693
												8551	8551	8583	8551	0														8311	8311	8354	8311	0														8694	8694
												8583	8583	8551	8583	0														8354	8354	8311	8354	0														8799	8799
												8584	8584	8550	8584	0														8456	8456	0	8456	8504														8800	8800
												8585	8585	8549	8585	0														8504	8504	0	8504	8456														8807	8807
												8799	8799	0	8799	8808														8551	8551	8583	8551	0														8808	8808
												8800	8800	0	8800	8807														8583	8583	8551	8583	0														8840	8840
												8807	8807	0	8807	8800														8652	8652	8694	8652	8662														8845	8845
												8808	8808	0	8808	8799														8653	8653	8693	8653	8661														8846	8846
												8840	8840	0	8840	8846														8654	8654	8692	8654	8660														8859	8859
												8845	8845	8912	8845	0														8660	8660	8687	8660	8654														8863	8863
												8846	8846	8911	8846	8840														8661	8661	0	8661	8653														8865	8865
												8859	8859	8971	8859	0														8662	8662	0	8662	8652														8866	8866
												8863	8863	8977	8863	0														8687	8687	8660	8687	0														8867	8867
												8865	8865	0	8865	8909														8692	8692	8654	8692	0														8868	8868
												8866	8866	0	8866	8908														8693	8693	8653	8693	0														8870	8870
												8867	8867	0	8867	8906														8694	8694	8652	8694	0														8871	8871
												8868	8868	0	8868	8905														8799	8799	0	8799	8808														8872	8872
												8870	8870	0	8870	8903														8800	8800	0	8800	8807														8873	8873
												8871	8871	0	8871	8902														8807	8807	0	8807	8800														8874	8874
												8872	8872	0	8872	8901														8808	8808	0	8808	8799														8875	8875
												8873	8873	0	8873	8900														8840	8840	0	8840	8846														8876	8876
												8874	8874	0	8874	8899														8845	8845	8912	8845	0														8878	8878
												8875	8875	0	8875	8898														8846	8846	8911	8846	8840														8879	8879
												8876	8876	0	8876	8897														8859	8859	8971	8859	0														8880	8880
												8878	8878	0	8878	8896														8863	8863	8977	8863	0														8881	8881
												8879	8879	0	8879	8895														8865	8865	0	8865	8909														8884	8884
												8880	8880	0	8880	8894														8866	8866	0	8866	8908														8885	8885
												8881	8881	0	8881	8893														8867	8867	0	8867	8906														8886	8886
												8884	8884	0	8884	8890														8868	8868	0	8868	8905														8889	8889
												8885	8885	0	8885	8889														8870	8870	0	8870	8903														8890	8890
												8886	8886	8891	8886	0														8871	8871	0	8871	8902														8891	8891
												8889	8889	0	8889	8885														8872	8872	0	8872	8901														8892	8892
												8890	8890	0	8890	8884														8873	8873	0	8873	8900														8893	8893
												8891	8891	8886	8891	0														8874	8874	0	8874	8899														8894	8894
												8892	8892	8901	8892	0														8875	8875	0	8875	8898														8895	8895
												8893	8893	8900	8893	8881														8876	8876	0	8876	8897														8896	8896
												8894	8894	0	8894	8880														8878	8878	0	8878	8896														8897	8897
												8895	8895	0	8895	8879														8879	8879	0	8879	8895														8898	8898
												8896	8896	0	8896	8878														8880	8880	0	8880	8894														8899	8899
												8897	8897	0	8897	8876														8881	8881	0	8881	8893														8900	8900
												8898	8898	0	8898	8875														8884	8884	0	8884	8890														8901	8901
												8899	8899	0	8899	8874														8885	8885	0	8885	8889														8902	8902
												8900	8900	8893	8900	8873														8886	8886	8891	8886	0														8903	8903
												8901	8901	8892	8901	8872														8889	8889	0	8889	8885														8905	8905
												8902	8902	0	8902	8871														8890	8890	0	8890	8884														8906	8906
												8903	8903	0	8903	8870														8891	8891	8886	8891	0														8908	8908
												8905	8905	8988	8905	8868														8892	8892	8901	8892	0														8909	8909
												8906	8906	0	8906	8867														8893	8893	8900	8893	8881														8911	8911
												8908	8908	0	8908	8866														8894	8894	0	8894	8880														8912	8912
												8909	8909	0	8909	8865														8895	8895	0	8895	8879														8921	8921
												8911	8911	8846	8911	0														8896	8896	0	8896	8878														8922	8922
												8912	8912	8845	8912	0														8897	8897	0	8897	8876														8924	8924
												8921	8921	8963	8921	0														8898	8898	0	8898	8875														8960	8960
												8922	8922	8962	8922	0														8899	8899	0	8899	8874														8962	8962
												8924	8924	8960	8924	0														8900	8900	8893	8900	8873														8963	8963
												8960	8960	8924	8960	0														8901	8901	8892	8901	8872														8971	8971
												8962	8962	8922	8962	0														8902	8902	0	8902	8871														8977	8977
												8963	8963	8921	8963	0														8903	8903	0	8903	8870														8988	8988
												8971	8971	8859	8971	0														8905	8905	8988	8905	8868
												8977	8977	8863	8977	0														8906	8906	0	8906	8867
												8988	8988	8905	8988	0														8908	8908	0	8908	8866
																														8909	8909	0	8909	8865
																														8911	8911	8846	8911	0
																														8912	8912	8845	8912	0
																														8921	8921	8963	8921	0
																														8922	8922	8962	8922	0
																														8924	8924	8960	8924	0
																														8960	8960	8924	8960	0
																														8962	8962	8922	8962	0
																														8963	8963	8921	8963	0
																														8971	8971	8859	8971	0
																														8977	8977	8863	8977	0
																														8988	8988	8905	8988	0
[truncated: 3 more columns]

## Sheet: HIV Di CT Comparison
Reference File= HIV-1_SF1_100_di_-2.ct						Reference File= HIV-1_SF1_100_di_-1.ct						Reference File= HIV-1_SF1_100_di_NoFilter.ct						Reference File= HIV-1_SF1_1000_di_-2.ct						Reference File= HIV-1_SF1_1000_di_-1.ct						Reference File= HIV-1_SF1_1000_di_NoFilter.ct						Reference File= HIV-1_SF1_10000_di_-2.ct						Reference File= HIV-1_SF1_10000_di_-1.ct						Reference File= HIV-1_SF1_10000_di_NoFilter.ct
Number of nucleotides paired: 408						Number of nucleotides paired: 1058						Number of nucleotides paired: 3136						Number of nucleotides paired: 410						Number of nucleotides paired: 1050						Number of nucleotides paired: 3106						Number of nucleotides paired: 416						Number of nucleotides paired: 1060						Number of nucleotides paired: 3120
Number of nucleotides unpaired: 8765						Number of nucleotides unpaired: 8115						Number of nucleotides unpaired: 6037						Number of nucleotides unpaired: 8763						Number of nucleotides unpaired: 8123						Number of nucleotides unpaired: 6067						Number of nucleotides unpaired: 8757						Number of nucleotides unpaired: 8113						Number of nucleotides unpaired: 6053
Percent of nucleotides paired: 4.447836040553799%						Percent of nucleotides paired: 11.533849340455685%						Percent of nucleotides paired: 34.187288782295866%						Percent of nucleotides paired: 4.4696391583996515%						Percent of nucleotides paired: 11.446636869072277%						Percent of nucleotides paired: 33.86024201460809%						Percent of nucleotides paired: 4.535048511937207%						Percent of nucleotides paired: 11.555652458301537%						Percent of nucleotides paired: 34.012863839529054%
Target File= HIV-1_SF2_-2.ct						Target File= HIV-1_SF2_-1.ct						Target File= HIV-1_SF2_NoFilter.ct						Target File= HIV-1_SF2_-2.ct						Target File= HIV-1_SF2_-1.ct						Target File= HIV-1_SF2_NoFilter.ct						Target File= HIV-1_SF2_-2.ct						Target File= HIV-1_SF2_-1.ct						Target File= HIV-1_SF2_NoFilter.ct
Number of nucleotides paired: 676						Number of nucleotides paired: 1706						Number of nucleotides paired: 3172						Number of nucleotides paired: 676						Number of nucleotides paired: 1706						Number of nucleotides paired: 3172						Number of nucleotides paired: 676						Number of nucleotides paired: 1706						Number of nucleotides paired: 3172
Number of nucleotides unpaired: 8497						Number of nucleotides unpaired: 7467						Number of nucleotides unpaired: 6001						Number of nucleotides unpaired: 8497						Number of nucleotides unpaired: 7467						Number of nucleotides unpaired: 6001						Number of nucleotides unpaired: 8497						Number of nucleotides unpaired: 7467						Number of nucleotides unpaired: 6001
Percent of nucleotides paired: 7.369453831897961%						Percent of nucleotides paired: 18.59805952251172%						Percent of nucleotides paired: 34.5797449035212%						Percent of nucleotides paired: 7.369453831897961%						Percent of nucleotides paired: 18.59805952251172%						Percent of nucleotides paired: 34.5797449035212%						Percent of nucleotides paired: 7.369453831897961%						Percent of nucleotides paired: 18.59805952251172%						Percent of nucleotides paired: 34.5797449035212%
Comparison of reference file to target file:						Comparison of reference file to target file:						Comparison of reference file to target file:						Comparison of reference file to target file:						Comparison of reference file to target file:						Comparison of reference file to target file:						Comparison of reference file to target file:						Comparison of reference file to target file:						Comparison of reference file to target file:
Reference File= HIV-1_SF1_100_di_-2.ct						Reference File= HIV-1_SF1_100_di_-1.ct						Reference File= HIV-1_SF1_100_di_NoFilter.ct						Reference File= HIV-1_SF1_1000_di_-2.ct						Reference File= HIV-1_SF1_1000_di_-1.ct						Reference File= HIV-1_SF1_1000_di_NoFilter.ct						Reference File= HIV-1_SF1_10000_di_-2.ct						Reference File= HIV-1_SF1_10000_di_-1.ct						Reference File= HIV-1_SF1_10000_di_NoFilter.ct
Target File= HIV-1_SF2_-2.ct						Target File= HIV-1_SF2_-1.ct						Target File= HIV-1_SF2_NoFilter.ct						Target File= HIV-1_SF2_-2.ct						Target File= HIV-1_SF2_-1.ct						Target File= HIV-1_SF2_NoFilter.ct						Target File= HIV-1_SF2_-2.ct						Target File= HIV-1_SF2_-1.ct						Target File= HIV-1_SF2_NoFilter.ct
Number of consistent nts/pairings: 8865						Number of consistent nts/pairings: 8358						Number of consistent nts/pairings: 7407						Number of consistent nts/pairings: 8871						Number of consistent nts/pairings: 8342						Number of consistent nts/pairings: 7392						Number of consistent nts/pairings: 8869						Number of consistent nts/pairings: 8350						Number of consistent nts/pairings: 7385
Number of conflicting nts/pairings: 308						Number of conflicting nts/pairings: 815						Number of conflicting nts/pairings: 1766						Number of conflicting nts/pairings: 302						Number of conflicting nts/pairings: 831						Number of conflicting nts/pairings: 1781						Number of conflicting nts/pairings: 304						Number of conflicting nts/pairings: 823						Number of conflicting nts/pairings: 1788
Percent consistency between files: 96.64%						Percent consistency between files: 91.12%						Percent consistency between files: 80.75%						Percent consistency between files: 96.71%						Percent consistency between files: 90.94%						Percent consistency between files: 80.58%						Percent consistency between files: 96.69%						Percent consistency between files: 91.03%						Percent consistency between files: 80.51%
Conflicting BPs between the Reference and Target file						Conflicting BPs between the Reference and Target file						Conflicting BPs between the Reference and Target file						Conflicting BPs between the Reference and Target file						Conflicting BPs between the Reference and Target file						Conflicting BPs between the Reference and Target file						Conflicting BPs between the Reference and Target file						Conflicting BPs between the Reference and Target file						Conflicting BPs between the Reference and Target file
Position	reference(i)	reference(j)	target(i)	target(j)		Position	reference(i)	reference(j)	target(i)	target(j)		Position	reference(i)	reference(j)	target(i)	target(j)		Position	reference(i)	reference(j)	target(i)	target(j)		Position	reference(i)	reference(j)	target(i)	target(j)		Position	reference(i)	reference(j)	target(i)	target(j)		Position	reference(i)	reference(j)	target(i)	target(j)		Position	reference(i)	reference(j)	target(i)	target(j)		Position	reference(i)
582	582	0	582	657		357	357	399	357	0		187	187	0	187	197		582	582	0	582	657		357	357	399	357	0		187	187	0	187	197		582	582	0	582	657		357	357	399	357	0		187	187
583	583	0	583	656		399	399	357	399	0		188	188	197	188	196		583	583	0	583	656		399	399	357	399	0		188	188	197	188	196		583	583	0	583	656		399	399	357	399	0		188	188
586	586	0	586	652		683	683	0	683	691		189	189	196	189	195		586	586	0	586	652		683	683	0	683	691		189	189	196	189	195		586	586	0	586	652		683	683	0	683	691		189	189
587	587	0	587	651		684	684	0	684	690		195	195	0	195	189		587	587	0	587	651		684	684	0	684	690		195	195	0	195	189		587	587	0	587	651		684	684	0	684	690		195	195
588	588	0	588	650		690	690	0	690	684		196	196	189	196	188		588	588	0	588	650		690	690	0	690	684		196	196	189	196	188		588	588	0	588	650		690	690	0	690	684		196	196
589	589	0	589	649		691	691	0	691	683		197	197	188	197	187		589	589	0	589	649		691	691	0	691	683		197	197	188	197	187		589	589	0	589	649		691	691	0	691	683		197	197
590	590	0	590	648		693	693	0	693	722		198	198	0	198	213		590	590	0	590	648		693	693	0	693	722		198	198	0	198	213		590	590	0	590	648		693	693	0	693	722		198	198
591	591	0	591	647		694	694	0	694	721		199	199	0	199	212		591	591	0	591	647		694	694	0	694	721		199	199	0	199	212		591	591	0	591	647		694	694	0	694	721		199	199
592	592	0	592	646		695	695	0	695	720		200	200	0	200	211		592	592	0	592	646		695	695	0	695	720		200	200	0	200	211		592	592	0	592	646		695	695	0	695	720		200	200
593	593	0	593	645		696	696	0	696	719		201	201	0	201	210		593	593	0	593	645		696	696	0	696	719		201	201	0	201	210		593	593	0	593	645		696	696	0	696	719		201	201
594	594	0	594	644		697	697	0	697	718		210	210	0	210	201		594	594	0	594	644		697	697	0	697	718		210	210	0	210	201		594	594	0	594	644		697	697	0	697	718		210	210
595	595	0	595	625		698	698	0	698	717		211	211	0	211	200		595	595	0	595	625		698	698	0	698	717		211	211	0	211	200		595	595	0	595	625		698	698	0	698	717		211	211
596	596	0	596	624		700	700	0	700	716		212	212	0	212	199		596	596	0	596	624		700	700	0	700	716		212	212	0	212	199		596	596	0	596	624		700	700	0	700	716		212	212
597	597	0	597	623		702	702	0	702	714		213	213	0	213	198		597	597	0	597	623		702	702	0	702	714		213	213	0	213	198		597	597	0	597	623		702	702	0	702	714		213	213
598	598	0	598	622		703	703	0	703	713		245	245	0	245	275		598	598	0	598	622		703	703	0	703	713		245	245	0	245	275		598	598	0	598	622		703	703	0	703	713		245	245
622	622	0	622	598		713	713	0	713	703		246	246	0	246	274		622	622	0	622	598		713	713	0	713	703		246	246	0	246	274		622	622	0	622	598		713	713	0	713	703		246	246
623	623	0	623	597		714	714	0	714	702		248	248	0	248	270		623	623	0	623	597		714	714	0	714	702		248	248	0	248	270		623	623	0	623	597		714	714	0	714	702		248	248
624	624	0	624	596		716	716	0	716	700		249	249	0	249	269		624	624	0	624	596		716	716	0	716	700		249	249	0	249	269		624	624	0	624	596		716	716	0	716	700		249	249
625	625	0	625	595		717	717	0	717	698		250	250	0	250	268		625	625	0	625	595		717	717	0	717	698		250	250	0	250	268		625	625	0	625	595		717	717	0	717	698		250	250
627	627	0	627	637		718	718	0	718	697		251	251	0	251	267		627	627	0	627	637		718	718	0	718	697		251	251	0	251	267		627	627	0	627	637		718	718	0	718	697		251	251
628	628	0	628	636		719	719	0	719	696		252	252	0	252	266		628	628	0	628	636		719	719	0	719	696		252	252	0	252	266		628	628	0	628	636		719	719	0	719	696		252	252
629	629	0	629	635		720	720	0	720	695		253	253	0	253	265		629	629	0	629	635		720	720	0	720	695		253	253	0	253	265		629	629	0	629	635		720	720	0	720	695		253	253
630	630	0	630	634		721	721	0	721	694		254	254	0	254	264		630	630	0	630	634		721	721	0	721	694		254	254	0	254	264		630	630	0	630	634		721	721	0	721	694		254	254
634	634	0	634	630		722	722	0	722	693		264	264	0	264	254		634	634	0	634	630		722	722	0	722	693		264	264	0	264	254		634	634	0	634	630		722	722	0	722	693		264	264
635	635	0	635	629		738	738	0	738	798		265	265	0	265	253		635	635	0	635	629		738	738	0	738	798		265	265	0	265	253		635	635	0	635	629		738	738	0	738	798		265	265
636	636	0	636	628		739	739	0	739	797		266	266	0	266	252		636	636	0	636	628		739	739	0	739	797		266	266	0	266	252		636	636	0	636	628		739	739	0	739	797		266	266
637	637	0	637	627		740	740	0	740	796		267	267	0	267	251		637	637	0	637	627		740	740	0	740	796		267	267	0	267	251		637	637	0	637	627		740	740	0	740	796		267	267
644	644	0	644	594		741	741	0	741	795		268	268	0	268	250		644	644	0	644	594		741	741	0	741	795		268	268	0	268	250		644	644	0	644	594		741	741	0	741	795		268	268
645	645	0	645	593		748	748	0	748	785		269	269	0	269	249		645	645	0	645	593		748	748	0	748	785		269	269	0	269	249		645	645	0	645	593		748	748	0	748	785		269	269
646	646	0	646	592		749	749	0	749	784		270	270	0	270	248		646	646	0	646	592		749	749	0	749	784		270	270	0	270	248		646	646	0	646	592		749	749	0	749	784		270	270
647	647	0	647	591		751	751	0	751	782		274	274	0	274	246		647	647	0	647	591		751	751	0	751	782		274	274	0	274	246		647	647	0	647	591		751	751	0	751	782		274	274
648	648	0	648	590		752	752	0	752	781		275	275	0	275	245		648	648	0	648	590		752	752	0	752	781		275	275	0	275	245		648	648	0	648	590		752	752	0	752	781		275	275
649	649	0	649	589		753	753	0	753	780		354	354	402	354	0		649	649	0	649	589		753	753	0	753	780		354	354	402	354	0		649	649	0	649	589		753	753	0	753	780		354	354
650	650	0	650	588		754	754	0	754	778		357	357	399	357	0		650	650	0	650	588		754	754	0	754	778		357	357	399	357	0		650	650	0	650	588		754	754	0	754	778		357	357
651	651	0	651	587		755	755	0	755	777		399	399	357	399	0		651	651	0	651	587		755	755	0	755	777		399	399	357	399	0		651	651	0	651	587		755	755	0	755	777		399	399
652	652	0	652	586		777	777	0	777	755		402	402	354	402	0		652	652	0	652	586		777	777	0	777	755		402	402	354	402	0		652	652	0	652	586		777	777	0	777	755		402	402
656	656	0	656	583		778	778	0	778	754		405	405	0	405	478		656	656	0	656	583		778	778	0	778	754		405	405	0	405	478		656	656	0	656	583		778	778	0	778	754		405	405
657	657	0	657	582		780	780	0	780	753		478	478	0	478	405		657	657	0	657	582		780	780	0	780	753		478	478	0	478	405		657	657	0	657	582		780	780	0	780	753		478	478
1060	1060	0	1060	1068		781	781	0	781	752		507	507	514	507	0		1060	1060	0	1060	1068		781	781	0	781	752		507	507	514	507	0		1060	1060	0	1060	1068		781	781	0	781	752		507	507
1061	1061	0	1061	1067		782	782	0	782	751		514	514	507	514	0		1061	1061	0	1061	1067		782	782	0	782	751		514	514	507	514	0		1061	1061	0	1061	1067		782	782	0	782	751		514	514
1067	1067	0	1067	1061		784	784	0	784	749		518	518	0	518	537		1067	1067	0	1067	1061		784	784	0	784	749		518	518	0	518	537		1067	1067	0	1067	1061		784	784	0	784	749		518	518
1068	1068	0	1068	1060		785	785	0	785	748		520	520	0	520	535		1068	1068	0	1068	1060		785	785	0	785	748		520	520	0	520	535		1068	1068	0	1068	1060		785	785	0	785	748		520	520
1074	1074	0	1074	1102		795	795	0	795	741		521	521	0	521	534		1074	1074	0	1074	1102		795	795	0	795	741		521	521	0	521	534		1074	1074	0	1074	1102		795	795	0	795	741		521	521
1075	1075	0	1075	1101		796	796	0	796	740		534	534	0	534	521		1075	1075	0	1075	1101		796	796	0	796	740		534	534	0	534	521		1075	1075	0	1075	1101		796	796	0	796	740		534	534
1076	1076	0	1076	1100		797	797	0	797	739		535	535	0	535	520		1076	1076	0	1076	1100		797	797	0	797	739		535	535	0	535	520		1076	1076	0	1076	1100		797	797	0	797	739		535	535
1077	1077	0	1077	1099		798	798	0	798	738		537	537	0	537	518		1077	1077	0	1077	1099		798	798	0	798	738		537	537	0	537	518		1077	1077	0	1077	1099		798	798	0	798	738		537	537
1078	1078	0	1078	1098		1060	1060	0	1060	1068		683	683	0	683	691		1078	1078	0	1078	1098		1060	1060	0	1060	1068		683	683	0	683	691		1078	1078	0	1078	1098		1057	1057	1071	1057	0		683	683
1080	1080	0	1080	1097		1061	1061	0	1061	1067		684	684	0	684	690		1080	1080	0	1080	1097		1061	1061	0	1061	1067		684	684	0	684	690		1080	1080	0	1080	1097		1058	1058	1070	1058	0		684	684
1081	1081	0	1081	1096		1067	1067	0	1067	1061		690	690	0	690	684		1081	1081	0	1081	1096		1067	1067	0	1067	1061		690	690	0	690	684		1081	1081	0	1081	1096		1070	1070	1058	1070	0		690	690
1082	1082	0	1082	1095		1068	1068	0	1068	1060		691	691	0	691	683		1082	1082	0	1082	1095		1068	1068	0	1068	1060		691	691	0	691	683		1082	1082	0	1082	1095		1071	1071	1057	1071	0		691	691
1083	1083	0	1083	1094		1155	1155	0	1155	1187		730	730	802	730	0		1083	1083	0	1083	1094		1155	1155	0	1155	1187		730	730	802	730	0		1083	1083	0	1083	1094		1155	1155	0	1155	1187		730	730
1084	1084	0	1084	1093		1156	1156	0	1156	1186		742	742	794	742	0		1084	1084	0	1084	1093		1156	1156	0	1156	1186		742	742	794	742	0		1084	1084	0	1084	1093		1156	1156	0	1156	1186		742	742
1093	1093	0	1093	1084		1158	1158	0	1158	1183		743	743	790	743	0		1093	1093	0	1093	1084		1158	1158	0	1158	1183		743	743	790	743	0		1093	1093	0	1093	1084		1158	1158	0	1158	1183		743	743
1094	1094	0	1094	1083		1159	1159	0	1159	1182		744	744	789	744	0		1094	1094	0	1094	1083		1159	1159	0	1159	1182		744	744	789	744	0		1094	1094	0	1094	1083		1159	1159	0	1159	1182		744	744
1095	1095	0	1095	1082		1160	1160	0	1160	1181		745	745	788	745	0		1095	1095	0	1095	1082		1160	1160	0	1160	1181		745	745	788	745	0		1095	1095	0	1095	1082		1160	1160	0	1160	1181		745	745
1096	1096	0	1096	1081		1161	1161	0	1161	1180		746	746	753	746	0		1096	1096	0	1096	1081		1161	1161	0	1161	1180		760	760	873	760	774		1096	1096	0	1096	1081		1161	1161	0	1161	1180		760	760
1097	1097	0	1097	1080		1162	1162	0	1162	1179		747	747	752	747	0		1097	1097	0	1097	1080		1162	1162	0	1162	1179		761	761	0	761	773		1097	1097	0	1097	1080		1162	1162	0	1162	1179		761	761
1098	1098	0	1098	1078		1163	1163	0	1163	1178		752	752	747	752	781		1098	1098	0	1098	1078		1163	1163	0	1163	1178		762	762	0	762	772		1098	1098	0	1098	1078		1163	1163	0	1163	1178		762	762
1099	1099	0	1099	1077		1164	1164	0	1164	1177		753	753	746	753	780		1099	1099	0	1099	1077		1164	1164	0	1164	1177		763	763	0	763	771		1099	1099	0	1099	1077		1164	1164	0	1164	1177		763	763
1100	1100	0	1100	1076		1177	1177	0	1177	1164		760	760	873	760	774		1100	1100	0	1100	1076		1177	1177	0	1177	1164		771	771	0	771	763		1100	1100	0	1100	1076		1177	1177	0	1177	1164		771	771
1101	1101	0	1101	1075		1178	1178	0	1178	1163		761	761	0	761	773		1101	1101	0	1101	1075		1178	1178	0	1178	1163		772	772	0	772	762		1101	1101	0	1101	1075		1178	1178	0	1178	1163		772	772
1102	1102	0	1102	1074		1179	1179	0	1179	1162		762	762	0	762	772		1102	1102	0	1102	1074		1179	1179	0	1179	1162		773	773	0	773	761		1102	1102	0	1102	1074		1179	1179	0	1179	1162		773	773
1103	1103	0	1103	1141		1180	1180	0	1180	1161		763	763	0	763	771		1103	1103	0	1103	1141		1180	1180	0	1180	1161		774	774	0	774	760		1103	1103	0	1103	1141		1180	1180	0	1180	1161		774	774
1104	1104	0	1104	1140		1181	1181	0	1181	1160		771	771	0	771	763		1104	1104	0	1104	1140		1181	1181	0	1181	1160		788	788	745	788	0		1104	1104	0	1104	1140		1181	1181	0	1181	1160		788	788
1105	1105	0	1105	1139		1182	1182	0	1182	1159		772	772	0	772	762		1105	1105	0	1105	1139		1182	1182	0	1182	1159		789	789	744	789	0		1105	1105	0	1105	1139		1182	1182	0	1182	1159		789	789
1106	1106	0	1106	1138		1183	1183	0	1183	1158		773	773	0	773	761		1106	1106	0	1106	1138		1183	1183	0	1183	1158		790	790	743	790	0		1106	1106	0	1106	1138		1183	1183	0	1183	1158		790	790
1110	1110	0	1110	1137		1186	1186	0	1186	1156		774	774	0	774	760		1110	1110	0	1110	1137		1186	1186	0	1186	1156		791	791	886	791	0		1110	1110	0	1110	1137		1186	1186	0	1186	1156		791	791
1111	1111	0	1111	1136		1187	1187	0	1187	1155		780	780	0	780	753		1111	1111	0	1111	1136		1187	1187	0	1187	1155		792	792	885	792	0		1111	1111	0	1111	1136		1187	1187	0	1187	1155		792	792
1112	1112	0	1112	1135		1197	1197	1305	1197	0		781	781	0	781	752		1112	1112	0	1112	1135		1197	1197	1305	1197	0		793	793	884	793	0		1112	1112	0	1112	1135		1197	1197	1305	1197	0		793	793
1116	1116	0	1116	1132		1198	1198	1304	1198	0		788	788	745	788	0		1116	1116	0	1116	1132		1198	1198	1304	1198	0		794	794	742	794	0		1116	1116	0	1116	1132		1198	1198	1304	1198	0		794	794
1117	1117	0	1117	1131		1200	1200	1302	1200	0		789	789	744	789	0		1117	1117	0	1117	1131		1200	1200	1302	1200	0		802	802	730	802	0		1117	1117	0	1117	1131		1200	1200	1302	1200	0		802	802
1118	1118	0	1118	1130		1201	1201	1301	1201	0		790	790	743	790	0		1118	1118	0	1118	1130		1201	1201	1301	1201	0		805	805	825	805	0		1118	1118	0	1118	1130		1201	1201	1301	1201	0		805	805
1119	1119	0	1119	1129		1301	1301	1201	1301	0		791	791	886	791	0		1119	1119	0	1119	1129		1301	1301	1201	1301	0		806	806	824	806	0		1119	1119	0	1119	1129		1301	1301	1201	1301	0		806	806
1120	1120	0	1120	1128		1302	1302	1200	1302	0		792	792	885	792	0		1120	1120	0	1120	1128		1302	1302	1200	1302	0		807	807	823	807	0		1120	1120	0	1120	1128		1302	1302	1200	1302	0		807	807
1121	1121	0	1121	1127		1304	1304	1198	1304	0		793	793	884	793	0		1121	1121	0	1121	1127		1304	1304	1198	1304	0		808	808	822	808	0		1121	1121	0	1121	1127		1304	1304	1198	1304	0		808	808
1127	1127	0	1127	1121		1305	1305	1197	1305	0		794	794	742	794	0		1127	1127	0	1127	1121		1305	1305	1197	1305	0		812	812	841	812	0		1127	1127	0	1127	1121		1305	1305	1197	1305	0		812	812
1128	1128	0	1128	1120		1477	1477	0	1477	1550		802	802	730	802	0		1128	1128	0	1128	1120		1477	1477	0	1477	1550		822	822	808	822	0		1128	1128	0	1128	1120		1477	1477	0	1477	1550		822	822
1129	1129	0	1129	1119		1479	1479	0	1479	1548		805	805	825	805	0		1129	1129	0	1129	1119		1479	1479	0	1479	1548		823	823	807	823	0		1129	1129	0	1129	1119		1479	1479	0	1479	1548		823	823
1130	1130	0	1130	1118		1480	1480	0	1480	1547		806	806	824	806	0		1130	1130	0	1130	1118		1480	1480	0	1480	1547		824	824	806	824	0		1130	1130	0	1130	1118		1480	1480	0	1480	1547		824	824
1131	1131	0	1131	1117		1486	1486	0	1486	1541		807	807	823	807	0		1131	1131	0	1131	1117		1486	1486	0	1486	1541		825	825	805	825	0		1131	1131	0	1131	1117		1486	1486	0	1486	1541		825	825
1132	1132	0	1132	1116		1487	1487	0	1487	1540		808	808	822	808	0		1132	1132	0	1132	1116		1487	1487	0	1487	1540		841	841	812	841	0		1132	1132	0	1132	1116		1487	1487	0	1487	1540		841	841
1135	1135	0	1135	1112		1495	1495	0	1495	1514		812	812	841	812	0		1135	1135	0	1135	1112		1495	1495	0	1495	1514		847	847	948	847	0		1135	1135	0	1135	1112		1495	1495	0	1495	1514		847	847
1136	1136	0	1136	1111		1496	1496	0	1496	1513		822	822	808	822	0		1136	1136	0	1136	1111		1496	1496	0	1496	1513		850	850	967	850	0		1136	1136	0	1136	1111		1496	1496	0	1496	1513		850	850
1137	1137	0	1137	1110		1497	1497	0	1497	1512		823	823	807	823	0		1137	1137	0	1137	1110		1497	1497	0	1497	1512		851	851	966	851	0		1137	1137	0	1137	1110		1497	1497	0	1497	1512		851	851
1138	1138	0	1138	1106		1498	1498	0	1498	1511		824	824	806	824	0		1138	1138	0	1138	1106		1498	1498	0	1498	1511		852	852	965	852	0		1138	1138	0	1138	1106		1498	1498	0	1498	1511		852	852
1139	1139	0	1139	1105		1500	1500	0	1500	1509		825	825	805	825	0		1139	1139	0	1139	1105		1500	1500	0	1500	1509		853	853	963	853	0		1139	1139	0	1139	1105		1500	1500	0	1500	1509		853	853
1140	1140	0	1140	1104		1501	1501	0	1501	1508		841	841	812	841	0		1140	1140	0	1140	1104		1501	1501	0	1501	1508		854	854	962	854	0		1140	1140	0	1140	1104		1501	1501	0	1501	1508		854	854
1141	1141	0	1141	1103		1502	1502	0	1502	1507		847	847	948	847	0		1141	1141	0	1141	1103		1502	1502	0	1502	1507		855	855	961	855	0		1141	1141	0	1141	1103		1502	1502	0	1502	1507		855	855
1197	1197	1305	1197	0		1507	1507	0	1507	1502		850	850	967	850	0		1197	1197	1305	1197	0		1507	1507	0	1507	1502		858	858	958	858	0		1197	1197	1305	1197	0		1507	1507	0	1507	1502		858	858
1198	1198	1304	1198	0		1508	1508	0	1508	1501		851	851	966	851	0		1198	1198	1304	1198	0		1508	1508	0	1508	1501		859	859	957	859	0		1198	1198	1304	1198	0		1508	1508	0	1508	1501		859	859
1200	1200	1302	1200	0		1509	1509	0	1509	1500		852	852	965	852	0		1200	1200	1302	1200	0		1509	1509	0	1509	1500		860	860	974	860	0		1200	1200	1302	1200	0		1509	1509	0	1509	1500		860	860
1201	1201	1301	1201	0		1511	1511	0	1511	1498		853	853	963	853	0		1201	1201	1301	1201	0		1511	1511	0	1511	1498		861	861	955	861	0		1201	1201	1301	1201	0		1511	1511	0	1511	1498		861	861
1301	1301	1201	1301	0		1512	1512	0	1512	1497		854	854	962	854	0		1301	1301	1201	1301	0		1512	1512	0	1512	1497		862	862	954	862	0		1301	1301	1201	1301	0		1512	1512	0	1512	1497		862	862
1302	1302	1200	1302	0		1513	1513	0	1513	1496		855	855	961	855	0		1302	1302	1200	1302	0		1513	1513	0	1513	1496		863	863	953	863	0		1302	1302	1200	1302	0		1513	1513	0	1513	1496		863	863
1304	1304	1198	1304	0		1514	1514	0	1514	1495		858	858	958	858	0		1304	1304	1198	1304	0		1514	1514	0	1514	1495		864	864	950	864	0		1304	1304	1198	1304	0		1514	1514	0	1514	1495		864	864
1305	1305	1197	1305	0		1518	1518	0	1518	1536		859	859	957	859	0		1305	1305	1197	1305	0		1518	1518	0	1518	1536		865	865	949	865	0		1305	1305	1197	1305	0		1518	1518	0	1518	1536		865	865
1477	1477	0	1477	1550		1519	1519	0	1519	1535		860	860	974	860	0		1477	1477	0	1477	1550		1519	1519	0	1519	1535		867	867	947	867	0		1477	1477	0	1477	1550		1519	1519	0	1519	1535		867	867
1479	1479	0	1479	1548		1520	1520	0	1520	1534		861	861	955	861	0		1479	1479	0	1479	1548		1520	1520	0	1520	1534		868	868	946	868	0		1479	1479	0	1479	1548		1520	1520	0	1520	1534		868	868
1480	1480	0	1480	1547		1521	1521	0	1521	1533		862	862	954	862	0		1480	1480	0	1480	1547		1521	1521	0	1521	1533		869	869	917	869	0		1480	1480	0	1480	1547		1521	1521	0	1521	1533		869	869
1486	1486	0	1486	1541		1523	1523	0	1523	1531		863	863	953	863	0		1486	1486	0	1486	1541		1523	1523	0	1523	1531		870	870	981	870	0		1486	1486	0	1486	1541		1523	1523	0	1523	1531		870	870
1487	1487	0	1487	1540		1531	1531	0	1531	1523		864	864	950	864	0		1487	1487	0	1487	1540		1531	1531	0	1531	1523		871	871	980	871	913		1487	1487	0	1487	1540		1531	1531	0	1531	1523		871	871
1518	1518	0	1518	1536		1533	1533	0	1533	1521		865	865	949	865	0		1518	1518	0	1518	1536		1533	1533	0	1533	1521		872	872	0	872	912		1518	1518	0	1518	1536		1533	1533	0	1533	1521		872	872
1519	1519	0	1519	1535		1534	1534	0	1534	1520		867	867	947	867	0		1519	1519	0	1519	1535		1534	1534	0	1534	1520		873	873	760	873	0		1519	1519	0	1519	1535		1534	1534	0	1534	1520		873	873
1520	1520	0	1520	1534		1535	1535	0	1535	1519		868	868	946	868	0		1520	1520	0	1520	1534		1535	1535	0	1535	1519		874	874	0	874	911		1520	1520	0	1520	1534		1535	1535	0	1535	1519		874	874
1521	1521	0	1521	1533		1536	1536	0	1536	1518		869	869	917	869	0		1521	1521	0	1521	1533		1536	1536	0	1536	1518		875	875	0	875	910		1521	1521	0	1521	1533		1536	1536	0	1536	1518		875	875
1523	1523	0	1523	1531		1540	1540	0	1540	1487		870	870	981	870	0		1523	1523	0	1523	1531		1540	1540	0	1540	1487		876	876	0	876	909		1523	1523	0	1523	1531		1540	1540	0	1540	1487		876	876
1531	1531	0	1531	1523		1541	1541	0	1541	1486		871	871	980	871	913		1531	1531	0	1531	1523		1541	1541	0	1541	1486		877	877	0	877	908		1531	1531	0	1531	1523		1541	1541	0	1541	1486		877	877
1533	1533	0	1533	1521		1547	1547	0	1547	1480		872	872	0	872	912		1533	1533	0	1533	1521		1547	1547	0	1547	1480		878	878	0	878	907		1533	1533	0	1533	1521		1547	1547	0	1547	1480		878	878
1534	1534	0	1534	1520		1548	1548	0	1548	1479		873	873	760	873	0		1534	1534	0	1534	1520		1548	1548	0	1548	1479		879	879	0	879	906		1534	1534	0	1534	1520		1548	1548	0	1548	1479		879	879
1535	1535	0	1535	1519		1550	1550	0	1550	1477		874	874	0	874	911		1535	1535	0	1535	1519		1550	1550	0	1550	1477		884	884	793	884	901		1535	1535	0	1535	1519		1550	1550	0	1550	1477		884	884
1536	1536	0	1536	1518		1551	1551	0	1551	1574		875	875	0	875	910		1536	1536	0	1536	1518		1551	1551	0	1551	1574		885	885	792	885	900		1536	1536	0	1536	1518		1551	1551	0	1551	1574		885	885
1540	1540	0	1540	1487		1553	1553	0	1553	1572		876	876	0	876	909		1540	1540	0	1540	1487		1553	1553	0	1553	1572		886	886	791	886	899		1540	1540	0	1540	1487		1553	1553	0	1553	1572		886	886
1541	1541	0	1541	1486		1554	1554	0	1554	1571		877	877	0	877	908		1541	1541	0	1541	1486		1554	1554	0	1554	1571		887	887	0	887	898		1541	1541	0	1541	1486		1554	1554	0	1554	1571		887	887
1547	1547	0	1547	1480		1555	1555	0	1555	1570		878	878	0	878	907		1547	1547	0	1547	1480		1555	1555	0	1555	1570		897	897	1012	897	0		1547	1547	0	1547	1480		1555	1555	0	1555	1570		897	897
1548	1548	0	1548	1479		1556	1556	0	1556	1569		879	879	0	879	906		1548	1548	0	1548	1479		1556	1556	0	1556	1569		898	898	1011	898	887		1548	1548	0	1548	1479		1556	1556	0	1556	1569		898	898
1550	1550	0	1550	1477		1557	1557	0	1557	1568		884	884	793	884	901		1550	1550	0	1550	1477		1557	1557	0	1557	1568		899	899	0	899	886		1550	1550	0	1550	1477		1557	1557	0	1557	1568		899	899
1551	1551	0	1551	1574		1568	1568	0	1568	1557		885	885	792	885	900		1551	1551	0	1551	1574		1568	1568	0	1568	1557		900	900	0	900	885		1551	1551	0	1551	1574		1568	1568	0	1568	1557		900	900
1553	1553	0	1553	1572		1569	1569	0	1569	1556		886	886	791	886	899		1553	1553	0	1553	1572		1569	1569	0	1569	1556		901	901	0	901	884		1553	1553	0	1553	1572		1569	1569	0	1569	1556		901	901
1554	1554	0	1554	1571		1570	1570	0	1570	1555		887	887	0	887	898		1554	1554	0	1554	1571		1570	1570	0	1570	1555		906	906	0	906	879		1554	1554	0	1554	1571		1570	1570	0	1570	1555		906	906
1555	1555	0	1555	1570		1571	1571	0	1571	1554		897	897	1012	897	0		1555	1555	0	1555	1570		1571	1571	0	1571	1554		907	907	0	907	878		1555	1555	0	1555	1570		1571	1571	0	1571	1554		907	907
1556	1556	0	1556	1569		1572	1572	0	1572	1553		898	898	1011	898	887		1556	1556	0	1556	1569		1572	1572	0	1572	1553		908	908	0	908	877		1556	1556	0	1556	1569		1572	1572	0	1572	1553		908	908
1557	1557	0	1557	1568		1574	1574	0	1574	1551		899	899	0	899	886		1557	1557	0	1557	1568		1574	1574	0	1574	1551		909	909	0	909	876		1557	1557	0	1557	1568		1574	1574	0	1574	1551		909	909
1568	1568	0	1568	1557		1642	1642	1681	1642	0		900	900	0	900	885		1568	1568	0	1568	1557		1642	1642	1681	1642	0		910	910	0	910	875		1568	1568	0	1568	1557		1642	1642	1681	1642	0		910	910
1569	1569	0	1569	1556		1681	1681	1642	1681	0		901	901	0	901	884		1569	1569	0	1569	1556		1681	1681	1642	1681	0		911	911	0	911	874		1569	1569	0	1569	1556		1681	1681	1642	1681	0		911	911
1570	1570	0	1570	1555		1738	1738	1748	1738	0		906	906	0	906	879		1570	1570	0	1570	1555		1738	1738	1748	1738	0		912	912	0	912	872		1570	1570	0	1570	1555		1738	1738	1748	1738	0		912	912
1571	1571	0	1571	1554		1739	1739	1747	1739	0		907	907	0	907	878		1571	1571	0	1571	1554		1739	1739	1747	1739	0		913	913	0	913	871		1571	1571	0	1571	1554		1739	1739	1747	1739	0		913	913
1572	1572	0	1572	1553		1747	1747	1739	1747	0		908	908	0	908	877		1572	1572	0	1572	1553		1747	1747	1739	1747	0		914	914	0	914	936		1572	1572	0	1572	1553		1747	1747	1739	1747	0		914	914
1574	1574	0	1574	1551		1748	1748	1738	1748	0		909	909	0	909	876		1574	1574	0	1574	1551		1748	1748	1738	1748	0		915	915	0	915	935		1574	1574	0	1574	1551		1748	1748	1738	1748	0		915	915
1615	1615	0	1615	1625		1801	1801	0	1801	1816		910	910	0	910	875		1642	1642	1681	1642	0		1801	1801	0	1801	1816		916	916	969	916	934		1642	1642	1681	1642	0		1801	1801	0	1801	1816		916	916
1616	1616	0	1616	1624		1802	1802	0	1802	1815		911	911	0	911	874		1681	1681	1642	1681	0		1802	1802	0	1802	1815		917	917	869	917	933		1681	1681	1642	1681	0		1802	1802	0	1802	1815		917	917
1617	1617	0	1617	1623		1803	1803	0	1803	1814		912	912	0	912	872		1709	1709	0	1709	1728		1803	1803	0	1803	1814		921	921	990	921	930		1709	1709	0	1709	1728		1803	1803	0	1803	1814		921	921
1623	1623	0	1623	1617		1804	1804	0	1804	1813		913	913	0	913	871		1710	1710	0	1710	1727		1804	1804	0	1804	1813		922	922	989	922	929		1710	1710	0	1710	1727		1804	1804	0	1804	1813		922	922
1624	1624	0	1624	1616		1805	1805	0	1805	1812		914	914	0	914	936		1711	1711	0	1711	1726		1805	1805	0	1805	1812		923	923	988	923	928		1711	1711	0	1711	1726		1805	1805	0	1805	1812		923	923
1625	1625	0	1625	1615		1812	1812	0	1812	1805		915	915	0	915	935		1713	1713	0	1713	1724		1812	1812	0	1812	1805		928	928	982	928	923		1713	1713	0	1713	1724		1812	1812	0	1812	1805		928	928
1642	1642	1681	1642	0		1813	1813	0	1813	1804		916	916	969	916	934		1714	1714	0	1714	1723		1813	1813	0	1813	1804		929	929	0	929	922		1714	1714	0	1714	1723		1813	1813	0	1813	1804		929	929
1681	1681	1642	1681	0		1814	1814	1915	1814	1803		917	917	869	917	933		1715	1715	0	1715	1722		1814	1814	1915	1814	1803		930	930	0	930	921		1715	1715	0	1715	1722		1814	1814	1915	1814	1803		930	930
1709	1709	0	1709	1728		1815	1815	1914	1815	1802		921	921	990	921	930		1716	1716	0	1716	1721		1815	1815	1914	1815	1802		931	931	979	931	0		1716	1716	0	1716	1721		1815	1815	1914	1815	1802		931	931
1710	1710	0	1710	1727		1816	1816	1913	1816	1801		922	922	989	922	929		1721	1721	0	1721	1716		1816	1816	1913	1816	1801		932	932	978	932	0		1721	1721	0	1721	1716		1816	1816	1913	1816	1801		932	932
1711	1711	0	1711	1726		1819	1819	0	1819	1850		923	923	988	923	928		1722	1722	0	1722	1715		1819	1819	0	1819	1850		933	933	0	933	917		1722	1722	0	1722	1715		1819	1819	0	1819	1850		933	933
1713	1713	0	1713	1724		1820	1820	0	1820	1849		928	928	982	928	923		1723	1723	0	1723	1714		1820	1820	0	1820	1849		934	934	0	934	916		1723	1723	0	1723	1714		1820	1820	0	1820	1849		934	934
1714	1714	0	1714	1723		1823	1823	0	1823	1847		929	929	0	929	922		1724	1724	0	1724	1713		1823	1823	0	1823	1847		935	935	0	935	915		1724	1724	0	1724	1713		1823	1823	0	1823	1847		935	935
1715	1715	0	1715	1722		1824	1824	0	1824	1846		930	930	0	930	921		1726	1726	0	1726	1711		1824	1824	0	1824	1846		936	936	0	936	914		1726	1726	0	1726	1711		1824	1824	0	1824	1846		936	936
1716	1716	0	1716	1721		1825	1825	0	1825	1845		931	931	979	931	0		1727	1727	0	1727	1710		1825	1825	0	1825	1845		946	946	868	946	971		1727	1727	0	1727	1710		1825	1825	0	1825	1845		946	946
1721	1721	0	1721	1716		1826	1826	0	1826	1844		932	932	978	932	0		1728	1728	0	1728	1709		1826	1826	0	1826	1844		947	947	867	947	970		1728	1728	0	1728	1709		1826	1826	0	1826	1844		947	947
1722	1722	0	1722	1715		1827	1827	0	1827	1843		933	933	0	933	917		2015	2015	2121	2015	0		1827	1827	0	1827	1843		948	948	847	948	0		2015	2015	2121	2015	0		1827	1827	0	1827	1843		948	948
1723	1723	0	1723	1714		1829	1829	0	1829	1842		934	934	0	934	916		2024	2024	0	2024	2112		1829	1829	0	1829	1842		949	949	865	949	968		2024	2024	0	2024	2112		1829	1829	0	1829	1842		949	949
1724	1724	0	1724	1713		1830	1830	0	1830	1841		935	935	0	935	915		2025	2025	0	2025	2111		1830	1830	0	1830	1841		950	950	864	950	0		2025	2025	0	2025	2111		1830	1830	0	1830	1841		950	950
1726	1726	0	1726	1711		1831	1831	0	1831	1840		936	936	0	936	914		2026	2026	0	2026	2110		1831	1831	0	1831	1840		953	953	863	953	965		2026	2026	0	2026	2110		1831	1831	0	1831	1840		953	953
1727	1727	0	1727	1710		1840	1840	0	1840	1831		946	946	868	946	971		2027	2027	0	2027	2109		1840	1840	0	1840	1831		954	954	862	954	964		2027	2027	0	2027	2109		1840	1840	0	1840	1831		954	954
1728	1728	0	1728	1709		1841	1841	0	1841	1830		947	947	867	947	970		2028	2028	0	2028	2108		1841	1841	0	1841	1830		955	955	861	955	962		2028	2028	0	2028	2108		1841	1841	0	1841	1830		955	955
2015	2015	2121	2015	0		1842	1842	0	1842	1829		948	948	847	948	0		2029	2029	0	2029	2107		1842	1842	0	1842	1829		957	957	859	957	0		2029	2029	0	2029	2107		1842	1842	0	1842	1829		957	957
2024	2024	0	2024	2112		1843	1843	0	1843	1827		949	949	865	949	968		2030	2030	0	2030	2106		1843	1843	0	1843	1827		958	958	858	958	0		2030	2030	0	2030	2106		1843	1843	0	1843	1827		958	958
2025	2025	0	2025	2111		1844	1844	0	1844	1826		950	950	864	950	0		2031	2031	0	2031	2105		1844	1844	0	1844	1826		961	961	855	961	0		2031	2031	0	2031	2105		1844	1844	0	1844	1826		961	961
2026	2026	0	2026	2110		1845	1845	0	1845	1825		953	953	863	953	965		2032	2032	0	2032	2104		1845	1845	0	1845	1825		962	962	854	962	955		2032	2032	0	2032	2104		1845	1845	0	1845	1825		962	962
2027	2027	0	2027	2109		1846	1846	0	1846	1824		954	954	862	954	964		2033	2033	0	2033	2103		1846	1846	0	1846	1824		963	963	853	963	0		2033	2033	0	2033	2103		1846	1846	0	1846	1824		963	963
2028	2028	0	2028	2108		1847	1847	0	1847	1823		955	955	861	955	962		2103	2103	0	2103	2033		1847	1847	0	1847	1823		964	964	0	964	954		2103	2103	0	2103	2033		1847	1847	0	1847	1823		964	964
2029	2029	0	2029	2107		1849	1849	0	1849	1820		957	957	859	957	0		2104	2104	0	2104	2032		1849	1849	0	1849	1820		965	965	852	965	953		2104	2104	0	2104	2032		1849	1849	0	1849	1820		965	965
2030	2030	0	2030	2106		1850	1850	0	1850	1819		958	958	858	958	0		2105	2105	0	2105	2031		1850	1850	0	1850	1819		966	966	851	966	0		2105	2105	0	2105	2031		1850	1850	0	1850	1819		966	966
2031	2031	0	2031	2105		1913	1913	1816	1913	0		961	961	855	961	0		2106	2106	0	2106	2030		1913	1913	1816	1913	0		967	967	850	967	0		2106	2106	0	2106	2030		1913	1913	1816	1913	0		967	967
2032	2032	0	2032	2104		1914	1914	1815	1914	0		962	962	854	962	955		2107	2107	0	2107	2029		1914	1914	1815	1914	0		968	968	0	968	949		2107	2107	0	2107	2029		1914	1914	1815	1914	0		968	968
2033	2033	0	2033	2103		1915	1915	1814	1915	0		963	963	853	963	0		2108	2108	0	2108	2028		1915	1915	1814	1915	0		969	969	916	969	0		2108	2108	0	2108	2028		1915	1915	1814	1915	0		969	969
2103	2103	0	2103	2033		2015	2015	2121	2015	0		964	964	0	964	954		2109	2109	0	2109	2027		2015	2015	2121	2015	0		970	970	0	970	947		2109	2109	0	2109	2027		2015	2015	2121	2015	0		970	970
2104	2104	0	2104	2032		2060	2060	0	2060	2077		965	965	852	965	953		2110	2110	0	2110	2026		2060	2060	0	2060	2077		971	971	0	971	946		2110	2110	0	2110	2026		2060	2060	0	2060	2077		971	971
2105	2105	0	2105	2031		2061	2061	0	2061	2076		966	966	851	966	0		2111	2111	0	2111	2025		2061	2061	0	2061	2076		974	974	860	974	0		2111	2111	0	2111	2025		2061	2061	0	2061	2076		974	974
2106	2106	0	2106	2030		2062	2062	0	2062	2075		967	967	850	967	0		2112	2112	0	2112	2024		2062	2062	0	2062	2075		978	978	932	978	0		2112	2112	0	2112	2024		2062	2062	0	2062	2075		978	978
2107	2107	0	2107	2029		2063	2063	0	2063	2074		968	968	0	968	949		2121	2121	2015	2121	0		2063	2063	0	2063	2074		979	979	931	979	0		2121	2121	2015	2121	0		2063	2063	0	2063	2074		979	979
2108	2108	0	2108	2028		2064	2064	0	2064	2073		969	969	916	969	0		2727	2727	0	2727	2745		2064	2064	0	2064	2073		980	980	871	980	0		2727	2727	0	2727	2745		2064	2064	0	2064	2073		980	980
2109	2109	0	2109	2027		2065	2065	0	2065	2072		970	970	0	970	947		2728	2728	0	2728	2744		2065	2065	0	2065	2072		981	981	870	981	0		2728	2728	0	2728	2744		2065	2065	0	2065	2072		981	981
2110	2110	0	2110	2026		2072	2072	0	2072	2065		971	971	0	971	946		2729	2729	0	2729	2743		2072	2072	0	2072	2065		982	982	928	982	0		2729	2729	0	2729	2743		2072	2072	0	2072	2065		982	982
2111	2111	0	2111	2025		2073	2073	0	2073	2064		974	974	860	974	0		2730	2730	0	2730	2742		2073	2073	0	2073	2064		988	988	923	988	0		2730	2730	0	2730	2742		2073	2073	0	2073	2064		988	988
2112	2112	0	2112	2024		2074	2074	0	2074	2063		978	978	932	978	0		2731	2731	0	2731	2740		2074	2074	0	2074	2063		989	989	922	989	0		2731	2731	0	2731	2740		2074	2074	0	2074	2063		989	989
2121	2121	2015	2121	0		2075	2075	0	2075	2062		979	979	931	979	0		2732	2732	0	2732	2739		2075	2075	0	2075	2062		990	990	921	990	0		2732	2732	0	2732	2739		2075	2075	0	2075	2062		990	990
2727	2727	0	2727	2745		2076	2076	0	2076	2061		980	980	871	980	0		2739	2739	0	2739	2732		2076	2076	0	2076	2061		997	997	0	997	1014		2739	2739	0	2739	2732		2076	2076	0	2076	2061		997	997
2728	2728	0	2728	2744		2077	2077	0	2077	2060		981	981	870	981	0		2740	2740	0	2740	2731		2077	2077	0	2077	2060		998	998	0	998	1013		2740	2740	0	2740	2731		2077	2077	0	2077	2060		998	998
2729	2729	0	2729	2743		2121	2121	2015	2121	0		982	982	928	982	0		2742	2742	0	2742	2730		2121	2121	2015	2121	0		999	999	0	999	1012		2742	2742	0	2742	2730		2121	2121	2015	2121	0		999	999
2730	2730	0	2730	2742		2144	2144	0	2144	2172		988	988	923	988	0		2743	2743	0	2743	2729		2144	2144	0	2144	2172		1000	1000	0	1000	1011		2743	2743	0	2743	2729		2144	2144	0	2144	2172		1000	1000
2731	2731	0	2731	2740		2145	2145	0	2145	2171		989	989	922	989	0		2744	2744	0	2744	2728		2145	2145	0	2145	2171		1001	1001	0	1001	1010		2744	2744	0	2744	2728		2145	2145	0	2145	2171		1001	1001
2732	2732	0	2732	2739		2146	2146	0	2146	2170		990	990	921	990	0		2745	2745	0	2745	2727		2146	2146	0	2146	2170		1010	1010	0	1010	1001		2745	2745	0	2745	2727		2146	2146	0	2146	2170		1010	1010
2739	2739	0	2739	2732		2147	2147	0	2147	2169		997	997	0	997	1014		2778	2778	2805	2778	0		2147	2147	0	2147	2169		1011	1011	898	1011	1000		2778	2778	2805	2778	0		2147	2147	0	2147	2169		1011	1011
2740	2740	0	2740	2731		2148	2148	0	2148	2168		998	998	0	998	1013		2779	2779	2804	2779	0		2148	2148	0	2148	2168		1012	1012	897	1012	999		2779	2779	2804	2779	0		2148	2148	0	2148	2168		1012	1012
2742	2742	0	2742	2730		2149	2149	0	2149	2167		999	999	0	999	1012		2781	2781	0	2781	2802		2149	2149	0	2149	2167		1013	1013	0	1013	998		2781	2781	0	2781	2802		2149	2149	0	2149	2167		1013	1013
2743	2743	0	2743	2729		2150	2150	0	2150	2166		1000	1000	0	1000	1011		2782	2782	0	2782	2801		2150	2150	0	2150	2166		1014	1014	0	1014	997		2782	2782	0	2782	2801		2150	2150	0	2150	2166		1014	1014
2744	2744	0	2744	2728		2166	2166	0	2166	2150		1001	1001	0	1001	1010		2783	2783	0	2783	2800		2166	2166	0	2166	2150		1057	1057	1071	1057	0		2783	2783	0	2783	2800		2166	2166	0	2166	2150		1057	1057
2745	2745	0	2745	2727		2167	2167	0	2167	2149		1010	1010	0	1010	1001		2784	2784	0	2784	2799		2167	2167	0	2167	2149		1058	1058	1070	1058	0		2784	2784	0	2784	2799		2167	2167	0	2167	2149		1058	1058
2778	2778	2805	2778	0		2168	2168	0	2168	2148		1011	1011	898	1011	1000		2785	2785	0	2785	2798		2168	2168	0	2168	2148		1070	1070	1058	1070	0		2785	2785	0	2785	2798		2168	2168	0	2168	2148		1070	1070
2781	2781	0	2781	2802		2169	2169	0	2169	2147		1012	1012	897	1012	999		2786	2786	0	2786	2797		2169	2169	0	2169	2147		1071	1071	1057	1071	0		2786	2786	0	2786	2797		2169	2169	0	2169	2147		1071	1071
2782	2782	0	2782	2801		2170	2170	0	2170	2146		1013	1013	0	1013	998		2787	2787	0	2787	2795		2170	2170	0	2170	2146		1197	1197	1305	1197	0		2787	2787	0	2787	2795		2170	2170	0	2170	2146		1197	1197
2783	2783	0	2783	2800		2171	2171	0	2171	2145		1014	1014	0	1014	997		2788	2788	0	2788	2794		2171	2171	0	2171	2145		1198	1198	1304	1198	0		2788	2788	0	2788	2794		2171	2171	0	2171	2145		1198	1198
2784	2784	0	2784	2799		2172	2172	0	2172	2144		1057	1057	1071	1057	0		2789	2789	0	2789	2793		2172	2172	0	2172	2144		1200	1200	1302	1200	0		2789	2789	0	2789	2793		2172	2172	0	2172	2144		1200	1200
2785	2785	0	2785	2798		2268	2268	0	2268	2310		1058	1058	1070	1058	0		2793	2793	0	2793	2789		2268	2268	0	2268	2310		1201	1201	1301	1201	0		2793	2793	0	2793	2789		2268	2268	0	2268	2310		1201	1201
2786	2786	0	2786	2797		2269	2269	0	2269	2309		1070	1070	1058	1070	0		2794	2794	0	2794	2788		2269	2269	0	2269	2309		1300	1300	0	1300	1352		2794	2794	0	2794	2788		2269	2269	0	2269	2309		1300	1300
2787	2787	0	2787	2795		2270	2270	0	2270	2308		1071	1071	1057	1071	0		2795	2795	0	2795	2787		2270	2270	0	2270	2308		1301	1301	1201	1301	1351		2795	2795	0	2795	2787		2270	2270	0	2270	2308		1301	1301
2788	2788	0	2788	2794		2271	2271	0	2271	2307		1197	1197	1305	1197	0		2797	2797	0	2797	2786		2271	2271	0	2271	2307		1302	1302	1200	1302	1350		2797	2797	0	2797	2786		2271	2271	0	2271	2307		1302	1302
2789	2789	0	2789	2793		2272	2272	0	2272	2306		1198	1198	1304	1198	0		2798	2798	0	2798	2785		2272	2272	0	2272	2306		1303	1303	0	1303	1349		2798	2798	0	2798	2785		2272	2272	0	2272	2306		1303	1303
2793	2793	0	2793	2789		2278	2278	0	2278	2300		1200	1200	1302	1200	0		2799	2799	0	2799	2784		2278	2278	0	2278	2300		1304	1304	1198	1304	1348		2799	2799	0	2799	2784		2278	2278	0	2278	2300		1304	1304
2794	2794	0	2794	2788		2279	2279	0	2279	2299		1201	1201	1301	1201	0		2800	2800	0	2800	2783		2279	2279	0	2279	2299		1305	1305	1197	1305	1347		2800	2800	0	2800	2783		2279	2279	0	2279	2299		1305	1305
2795	2795	0	2795	2787		2280	2280	0	2280	2298		1300	1300	0	1300	1352		2801	2801	0	2801	2782		2280	2280	0	2280	2298		1308	1308	0	1308	1345		2801	2801	0	2801	2782		2280	2280	0	2280	2298		1308	1308
2797	2797	0	2797	2786		2298	2298	0	2298	2280		1301	1301	1201	1301	1351		2802	2802	0	2802	2781		2298	2298	0	2298	2280		1309	1309	0	1309	1344		2802	2802	0	2802	2781		2298	2298	0	2298	2280		1309	1309
2798	2798	0	2798	2785		2299	2299	0	2299	2279		1302	1302	1200	1302	1350		2804	2804	2779	2804	0		2299	2299	0	2299	2279		1344	1344	0	1344	1309		2804	2804	2779	2804	0		2299	2299	0	2299	2279		1344	1344
2799	2799	0	2799	2784		2300	2300	0	2300	2278		1303	1303	0	1303	1349		2805	2805	2778	2805	0		2300	2300	0	2300	2278		1345	1345	0	1345	1308		2805	2805	2778	2805	0		2300	2300	0	2300	2278		1345	1345
2800	2800	0	2800	2783		2306	2306	0	2306	2272		1304	1304	1198	1304	1348		2814	2814	0	2814	2833		2306	2306	0	2306	2272		1347	1347	0	1347	1305		2814	2814	0	2814	2833		2306	2306	0	2306	2272		1347	1347
2801	2801	0	2801	2782		2307	2307	0	2307	2271		1305	1305	1197	1305	1347		2815	2815	0	2815	2832		2307	2307	0	2307	2271		1348	1348	0	1348	1304		2815	2815	0	2815	2832		2307	2307	0	2307	2271		1348	1348
2802	2802	0	2802	2781		2308	2308	0	2308	2270		1308	1308	0	1308	1345		2816	2816	0	2816	2831		2308	2308	0	2308	2270		1349	1349	0	1349	1303		2816	2816	0	2816	2831		2308	2308	0	2308	2270		1349	1349
2805	2805	2778	2805	0		2309	2309	0	2309	2269		1309	1309	0	1309	1344		2817	2817	0	2817	2830		2309	2309	0	2309	2269		1350	1350	0	1350	1302		2817	2817	0	2817	2830		2309	2309	0	2309	2269		1350	1350
2814	2814	0	2814	2833		2310	2310	0	2310	2268		1344	1344	0	1344	1309		2818	2818	0	2818	2829		2310	2310	0	2310	2268		1351	1351	0	1351	1301		2818	2818	0	2818	2829		2310	2310	0	2310	2268		1351	1351
2815	2815	0	2815	2832		2330	2330	0	2330	2366		1345	1345	0	1345	1308		2819	2819	0	2819	2828		2330	2330	0	2330	2366		1352	1352	0	1352	1300		2819	2819	0	2819	2828		2330	2330	0	2330	2366		1352	1352
2816	2816	0	2816	2831		2331	2331	0	2331	2365		1347	1347	0	1347	1305		2828	2828	0	2828	2819		2331	2331	0	2331	2365		1421	1421	1443	1421	0		2828	2828	0	2828	2819		2331	2331	0	2331	2365		1421	1421
2817	2817	0	2817	2830		2332	2332	0	2332	2364		1348	1348	0	1348	1304		2829	2829	0	2829	2818		2332	2332	0	2332	2364		1422	1422	0	1422	1442		2829	2829	0	2829	2818		2332	2332	0	2332	2364		1422	1422
2818	2818	0	2818	2829		2333	2333	0	2333	2363		1349	1349	0	1349	1303		2830	2830	0	2830	2817		2333	2333	0	2333	2363		1423	1423	0	1423	1441		2830	2830	0	2830	2817		2333	2333	0	2333	2363		1423	1423
2819	2819	0	2819	2828		2334	2334	0	2334	2362		1350	1350	0	1350	1302		2831	2831	0	2831	2816		2334	2334	0	2334	2362		1424	1424	0	1424	1440		2831	2831	0	2831	2816		2334	2334	0	2334	2362		1424	1424
2828	2828	0	2828	2819		2335	2335	0	2335	2361		1351	1351	0	1351	1301		2832	2832	0	2832	2815		2335	2335	0	2335	2361		1425	1425	0	1425	1439		2832	2832	0	2832	2815		2335	2335	0	2335	2361		1425	1425
2829	2829	0	2829	2818		2340	2340	0	2340	2357		1352	1352	0	1352	1300		2833	2833	0	2833	2814		2340	2340	0	2340	2357		1426	1426	0	1426	1438		2833	2833	0	2833	2814		2340	2340	0	2340	2357		1426	1426
2830	2830	0	2830	2817		2341	2341	0	2341	2356		1421	1421	1443	1421	0		3811	3811	0	3811	3906		2341	2341	0	2341	2356		1427	1427	0	1427	1437		3812	3812	0	3812	3905		2341	2341	0	2341	2356		1427	1427
2831	2831	0	2831	2816		2342	2342	0	2342	2355		1422	1422	0	1422	1442		3812	3812	0	3812	3905		2342	2342	0	2342	2355		1429	1429	0	1429	1435		3813	3813	0	3813	3904		2342	2342	0	2342	2355		1429	1429
2832	2832	0	2832	2815		2343	2343	0	2343	2354		1423	1423	0	1423	1441		3813	3813	0	3813	3904		2343	2343	0	2343	2354		1435	1435	0	1435	1429		3815	3815	0	3815	3902		2343	2343	0	2343	2354		1435	1435
2833	2833	0	2833	2814		2344	2344	0	2344	2353		1424	1424	0	1424	1440		3815	3815	0	3815	3902		2344	2344	0	2344	2353		1437	1437	0	1437	1427		3818	3818	0	3818	3899		2344	2344	0	2344	2353		1437	1437
3812	3812	0	3812	3905		2353	2353	0	2353	2344		1425	1425	0	1425	1439		3818	3818	0	3818	3899		2353	2353	0	2353	2344		1438	1438	0	1438	1426		3819	3819	0	3819	3898		2353	2353	0	2353	2344		1438	1438
3813	3813	0	3813	3904		2354	2354	0	2354	2343		1426	1426	0	1426	1438		3819	3819	0	3819	3898		2354	2354	0	2354	2343		1439	1439	1455	1439	1425		3820	3820	0	3820	3897		2354	2354	0	2354	2343		1439	1439
3815	3815	0	3815	3902		2355	2355	0	2355	2342		1427	1427	1454	1427	1437		3820	3820	0	3820	3897		2355	2355	0	2355	2342		1440	1440	0	1440	1424		3821	3821	0	3821	3896		2355	2355	0	2355	2342		1440	1440
3818	3818	0	3818	3899		2356	2356	0	2356	2341		1429	1429	0	1429	1435		3821	3821	0	3821	3896		2356	2356	0	2356	2341		1441	1441	0	1441	1423		3822	3822	0	3822	3895		2356	2356	0	2356	2341		1441	1441
3819	3819	0	3819	3898		2357	2357	0	2357	2340		1435	1435	0	1435	1429		3822	3822	0	3822	3895		2357	2357	0	2357	2340		1442	1442	0	1442	1422		3823	3823	0	3823	3894		2357	2357	0	2357	2340		1442	1442
3820	3820	0	3820	3897		2361	2361	0	2361	2335		1437	1437	0	1437	1427		3823	3823	0	3823	3894		2361	2361	0	2361	2335		1443	1443	1421	1443	0		3824	3824	0	3824	3893		2361	2361	0	2361	2335		1443	1443
3821	3821	0	3821	3896		2362	2362	0	2362	2334		1438	1438	0	1438	1426		3824	3824	0	3824	3893		2362	2362	0	2362	2334		1445	1445	1468	1445	0		3825	3825	0	3825	3892		2362	2362	0	2362	2334		1445	1445
3822	3822	0	3822	3895		2363	2363	0	2363	2333		1439	1439	1455	1439	1425		3825	3825	0	3825	3892		2363	2363	0	2363	2333		1455	1455	1439	1455	0		3826	3826	0	3826	3891		2363	2363	0	2363	2333		1454	1454
3823	3823	0	3823	3894		2364	2364	0	2364	2332		1440	1440	0	1440	1424		3826	3826	0	3826	3891		2364	2364	0	2364	2332		1468	1468	1445	1468	0		3891	3891	0	3891	3826		2364	2364	0	2364	2332		1455	1455
3824	3824	0	3824	3893		2365	2365	0	2365	2331		1441	1441	0	1441	1423		3891	3891	0	3891	3826		2365	2365	0	2365	2331		1551	1551	0	1551	1574		3892	3892	0	3892	3825		2365	2365	0	2365	2331		1468	1468
3825	3825	0	3825	3892		2366	2366	0	2366	2330		1442	1442	0	1442	1422		3892	3892	0	3892	3825		2366	2366	0	2366	2330		1553	1553	0	1553	1572		3893	3893	0	3893	3824		2366	2366	0	2366	2330		1551	1551
3826	3826	0	3826	3891		2417	2417	2499	2417	0		1443	1443	1421	1443	0		3893	3893	0	3893	3824		2417	2417	2499	2417	0		1554	1554	0	1554	1571		3894	3894	0	3894	3823		2417	2417	2499	2417	0		1553	1553
3891	3891	0	3891	3826		2418	2418	2498	2418	0		1445	1445	1468	1445	0		3894	3894	0	3894	3823		2418	2418	2498	2418	0		1555	1555	0	1555	1570		3895	3895	0	3895	3822		2418	2418	2498	2418	0		1554	1554
3892	3892	0	3892	3825		2425	2425	2491	2425	0		1454	1454	1427	1454	0		3895	3895	0	3895	3822		2425	2425	2491	2425	0		1556	1556	0	1556	1569		3896	3896	0	3896	3821		2425	2425	2491	2425	0		1555	1555
3893	3893	0	3893	3824		2491	2491	2425	2491	0		1455	1455	1439	1455	0		3896	3896	0	3896	3821		2491	2491	2425	2491	0		1557	1557	0	1557	1568		3897	3897	0	3897	3820		2491	2491	2425	2491	0		1556	1556
3894	3894	0	3894	3823		2498	2498	2418	2498	0		1468	1468	1445	1468	0		3897	3897	0	3897	3820		2498	2498	2418	2498	0		1568	1568	0	1568	1557		3898	3898	0	3898	3819		2498	2498	2418	2498	0		1557	1557
3895	3895	0	3895	3822		2499	2499	2417	2499	0		1551	1551	0	1551	1574		3898	3898	0	3898	3819		2499	2499	2417	2499	0		1569	1569	0	1569	1556		3899	3899	0	3899	3818		2499	2499	2417	2499	0		1568	1568
3896	3896	0	3896	3821		2572	2572	0	2572	2579		1553	1553	0	1553	1572		3899	3899	0	3899	3818		2572	2572	0	2572	2579		1570	1570	0	1570	1555		3902	3902	0	3902	3815		2572	2572	0	2572	2579		1569	1569
3897	3897	0	3897	3820		2573	2573	0	2573	2578		1554	1554	0	1554	1571		3902	3902	0	3902	3815		2573	2573	0	2573	2578		1571	1571	0	1571	1554		3904	3904	0	3904	3813		2573	2573	0	2573	2578		1570	1570
3898	3898	0	3898	3819		2578	2578	0	2578	2573		1555	1555	0	1555	1570		3904	3904	0	3904	3813		2578	2578	0	2578	2573		1572	1572	0	1572	1553		3905	3905	0	3905	3812		2578	2578	0	2578	2573		1571	1571
3899	3899	0	3899	3818		2579	2579	0	2579	2572		1556	1556	0	1556	1569		3905	3905	0	3905	3812		2579	2579	0	2579	2572		1574	1574	0	1574	1551		4893	4893	0	4893	4914		2579	2579	0	2579	2572		1572	1572
3902	3902	0	3902	3815		2778	2778	2805	2778	0		1557	1557	0	1557	1568		3906	3906	0	3906	3811		2778	2778	2805	2778	0		1642	1642	1681	1642	0		4894	4894	0	4894	4913		2778	2778	2805	2778	0		1574	1574
3904	3904	0	3904	3813		2805	2805	2778	2805	0		1568	1568	0	1568	1557		4893	4893	0	4893	4914		2779	2779	2804	2779	0		1681	1681	1642	1681	0		4895	4895	0	4895	4912		2779	2779	2804	2779	0		1642	1642
3905	3905	0	3905	3812		3205	3205	3314	3205	0		1569	1569	0	1569	1556		4894	4894	0	4894	4913		2804	2804	2779	2804	0		1738	1738	1748	1738	0		4896	4896	0	4896	4911		2804	2804	2779	2804	0		1681	1681
4893	4893	0	4893	4914		3232	3232	0	3232	3243		1570	1570	0	1570	1555		4895	4895	0	4895	4912		2805	2805	2778	2805	0		1739	1739	1747	1739	0		4897	4897	0	4897	4910		2805	2805	2778	2805	0		1738	1738
4894	4894	0	4894	4913		3233	3233	0	3233	3242		1571	1571	0	1571	1554		4896	4896	0	4896	4911		3205	3205	3314	3205	0		1747	1747	1739	1747	0		4910	4910	0	4910	4897		3205	3205	3314	3205	0		1739	1739
4895	4895	0	4895	4912		3234	3234	0	3234	3241		1572	1572	0	1572	1553		4897	4897	0	4897	4910		3232	3232	0	3232	3243		1748	1748	1738	1748	0		4911	4911	0	4911	4896		3232	3232	0	3232	3243		1747	1747
4896	4896	0	4896	4911		3235	3235	0	3235	3240		1574	1574	0	1574	1551		4910	4910	0	4910	4897		3233	3233	0	3233	3242		1801	1801	0	1801	1816		4912	4912	0	4912	4895		3233	3233	0	3233	3242		1748	1748
4897	4897	0	4897	4910		3240	3240	0	3240	3235		1642	1642	1681	1642	0		4911	4911	0	4911	4896		3234	3234	0	3234	3241		1802	1802	0	1802	1815		4913	4913	0	4913	4894		3234	3234	0	3234	3241		1801	1801
4910	4910	0	4910	4897		3241	3241	0	3241	3234		1681	1681	1642	1681	0		4912	4912	0	4912	4895		3235	3235	0	3235	3240		1803	1803	0	1803	1814		4914	4914	0	4914	4893		3235	3235	0	3235	3240		1802	1802
4911	4911	0	4911	4896		3242	3242	0	3242	3233		1738	1738	1748	1738	0		4913	4913	0	4913	4894		3240	3240	0	3240	3235		1814	1814	1915	1814	1803		5066	5066	5144	5066	0		3240	3240	0	3240	3235		1803	1803
4912	4912	0	4912	4895		3243	3243	0	3243	3232		1739	1739	1747	1739	0		4914	4914	0	4914	4893		3241	3241	0	3241	3234		1815	1815	1914	1815	1802		5067	5067	5143	5067	0		3241	3241	0	3241	3234		1814	1814
4913	4913	0	4913	4894		3244	3244	0	3244	3256		1747	1747	1739	1747	0		7351	7351	0	7351	7382		3242	3242	0	3242	3233		1816	1816	1913	1816	1801		5143	5143	5067	5143	0		3242	3242	0	3242	3233		1815	1815
4914	4914	0	4914	4893		3245	3245	0	3245	3255		1748	1748	1738	1748	0		7353	7353	0	7353	7380		3243	3243	0	3243	3232		1913	1913	1816	1913	0		5144	5144	5066	5144	0		3243	3243	0	3243	3232		1816	1816
5066	5066	5144	5066	0		3246	3246	0	3246	3254		1801	1801	0	1801	1816		7354	7354	0	7354	7379		3244	3244	0	3244	3256		1914	1914	1815	1914	0		7351	7351	0	7351	7382		3244	3244	0	3244	3256		1913	1913
5067	5067	5143	5067	0		3247	3247	0	3247	3253		1802	1802	0	1802	1815		7355	7355	0	7355	7378		3245	3245	0	3245	3255		1915	1915	1814	1915	0		7353	7353	0	7353	7380		3245	3245	0	3245	3255		1914	1914
5143	5143	5067	5143	0		3253	3253	0	3253	3247		1803	1803	0	1803	1814		7358	7358	0	7358	7374		3246	3246	0	3246	3254		1922	1922	0	1922	1930		7354	7354	0	7354	7379		3246	3246	0	3246	3254		1915	1915
5144	5144	5066	5144	0		3254	3254	0	3254	3246		1814	1814	1915	1814	1803		7359	7359	0	7359	7373		3247	3247	0	3247	3253		1923	1923	0	1923	1929		7355	7355	0	7355	7378		3247	3247	0	3247	3253		1922	1922
7351	7351	0	7351	7382		3255	3255	0	3255	3245		1815	1815	1914	1815	1802		7360	7360	0	7360	7372		3253	3253	0	3253	3247		1924	1924	0	1924	1928		7358	7358	0	7358	7374		3253	3253	0	3253	3247		1923	1923
7353	7353	0	7353	7380		3256	3256	0	3256	3244		1816	1816	1913	1816	1801		7361	7361	0	7361	7371		3254	3254	0	3254	3246		1925	1925	1956	1925	0		7359	7359	0	7359	7373		3254	3254	0	3254	3246		1924	1924
7354	7354	0	7354	7379		3270	3270	0	3270	3281		1913	1913	1816	1913	0		7362	7362	0	7362	7370		3255	3255	0	3255	3245		1926	1926	1955	1926	0		7360	7360	0	7360	7372		3255	3255	0	3255	3245		1925	1925
7355	7355	0	7355	7378		3271	3271	0	3271	3280		1914	1914	1815	1914	0		7370	7370	0	7370	7362		3256	3256	0	3256	3244		1927	1927	1954	1927	0		7361	7361	0	7361	7371		3256	3256	0	3256	3244		1926	1926
7358	7358	0	7358	7374		3280	3280	0	3280	3271		1915	1915	1814	1915	0		7371	7371	0	7371	7361		3270	3270	0	3270	3281		1928	1928	0	1928	1924		7362	7362	0	7362	7370		3270	3270	0	3270	3281		1927	1927
7359	7359	0	7359	7373		3281	3281	0	3281	3270		1922	1922	0	1922	1930		7372	7372	0	7372	7360		3271	3271	0	3271	3280		1929	1929	0	1929	1923		7370	7370	0	7370	7362		3271	3271	0	3271	3280		1928	1928
7360	7360	0	7360	7372		3288	3288	0	3288	3294		1923	1923	0	1923	1929		7373	7373	0	7373	7359		3280	3280	0	3280	3271		1930	1930	0	1930	1922		7371	7371	0	7371	7361		3280	3280	0	3280	3271		1929	1929
7361	7361	0	7361	7371		3294	3294	0	3294	3288		1924	1924	0	1924	1928		7374	7374	0	7374	7358		3281	3281	0	3281	3270		1933	1933	1948	1933	0		7372	7372	0	7372	7360		3281	3281	0	3281	3270		1930	1930
7362	7362	0	7362	7370		3314	3314	3205	3314	0		1925	1925	1956	1925	0		7378	7378	0	7378	7355		3288	3288	0	3288	3294		1934	1934	1947	1934	0		7373	7373	0	7373	7359		3288	3288	0	3288	3294		1933	1933
7370	7370	0	7370	7362		3828	3828	0	3828	3840		1926	1926	1955	1926	0		7379	7379	0	7379	7354		3294	3294	0	3294	3288		1947	1947	1934	1947	0		7374	7374	0	7374	7358		3294	3294	0	3294	3288		1934	1934
7371	7371	0	7371	7361		3829	3829	0	3829	3839		1927	1927	1954	1927	0		7380	7380	0	7380	7353		3314	3314	3205	3314	0		1948	1948	1933	1948	0		7378	7378	0	7378	7355		3314	3314	3205	3314	0		1947	1947
7372	7372	0	7372	7360		3830	3830	0	3830	3838		1928	1928	0	1928	1924		7382	7382	0	7382	7351		3828	3828	0	3828	3840		1954	1954	1927	1954	0		7379	7379	0	7379	7354		3828	3828	0	3828	3840		1948	1948
7373	7373	0	7373	7359		3831	3831	0	3831	3837		1929	1929	1952	1929	1923		8669	8669	0	8669	8679		3829	3829	0	3829	3839		1955	1955	1926	1955	0		7380	7380	0	7380	7353		3829	3829	0	3829	3839		1954	1954
7374	7374	0	7374	7358		3837	3837	0	3837	3831		1930	1930	0	1930	1922		8670	8670	0	8670	8678		3830	3830	0	3830	3838		1956	1956	1925	1956	0		7382	7382	0	7382	7351		3830	3830	0	3830	3838		1955	1955
7378	7378	0	7378	7355		3838	3838	0	3838	3830		1933	1933	1948	1933	0		8671	8671	0	8671	8677		3831	3831	0	3831	3837		2015	2015	2121	2015	0		8669	8669	0	8669	8679		3831	3831	0	3831	3837		1956	1956
7379	7379	0	7379	7354		3839	3839	0	3839	3829		1934	1934	1947	1934	0		8677	8677	0	8677	8671		3837	3837	0	3837	3831		2121	2121	2015	2121	0		8670	8670	0	8670	8678		3837	3837	0	3837	3831		2015	2015
7380	7380	0	7380	7353		3840	3840	0	3840	3828		1947	1947	1934	1947	0		8678	8678	0	8678	8670		3838	3838	0	3838	3830		2132	2132	2195	2132	0		8671	8671	0	8671	8677		3838	3838	0	3838	3830		2121	2121
7382	7382	0	7382	7351		3841	3841	0	3841	3889		1948	1948	1933	1948	0		8679	8679	0	8679	8669		3839	3839	0	3839	3829		2134	2134	2193	2134	0		8677	8677	0	8677	8671		3839	3839	0	3839	3829		2132	2132
8669	8669	0	8669	8679		3842	3842	0	3842	3888		1952	1952	1929	1952	0		8687	8687	8692	8687	0		3840	3840	0	3840	3828		2135	2135	2192	2135	0		8678	8678	0	8678	8670		3840	3840	0	3840	3828		2134	2134
8670	8670	0	8670	8678		3843	3843	0	3843	3887		1954	1954	1927	1954	0		8692	8692	8687	8692	0		3841	3841	0	3841	3889		2192	2192	2135	2192	0		8679	8679	0	8679	8669		3841	3841	0	3841	3889		2135	2135
8671	8671	0	8671	8677		3844	3844	0	3844	3886		1955	1955	1926	1955	0		9018	9018	0	9018	9039		3842	3842	0	3842	3888		2193	2193	2134	2193	0		8687	8687	8692	8687	0		3842	3842	0	3842	3888		2192	2192
8677	8677	0	8677	8671		3845	3845	0	3845	3885		1956	1956	1925	1956	0		9019	9019	0	9019	9038		3843	3843	0	3843	3887		2195	2195	2132	2195	0		8692	8692	8687	8692	0		3843	3843	0	3843	3887		2193	2193
8678	8678	0	8678	8670		3847	3847	0	3847	3883		1989	1989	1998	1989	0		9020	9020	0	9020	9037		3844	3844	0	3844	3886		2217	2217	0	2217	2260		9018	9018	0	9018	9039		3844	3844	0	3844	3886		2195	2195
8679	8679	0	8679	8669		3848	3848	0	3848	3882		1990	1990	1997	1990	0		9021	9021	0	9021	9036		3845	3845	0	3845	3885		2218	2218	0	2218	2259		9019	9019	0	9019	9038		3845	3845	0	3845	3885		2217	2217
8687	8687	8692	8687	0		3850	3850	0	3850	3880		1991	1991	1996	1991	0		9022	9022	0	9022	9035		3847	3847	0	3847	3883		2219	2219	0	2219	2258		9020	9020	0	9020	9037		3847	3847	0	3847	3883		2218	2218
8692	8692	8687	8692	0		3851	3851	0	3851	3879		1996	1996	1991	1996	0		9023	9023	0	9023	9034		3848	3848	0	3848	3882		2225	2225	2238	2225	0		9021	9021	0	9021	9036		3848	3848	0	3848	3882		2219	2219
9018	9018	0	9018	9039		3852	3852	0	3852	3878		1997	1997	1990	1997	0		9025	9025	0	9025	9033		3850	3850	0	3850	3880		2226	2226	2237	2226	0		9022	9022	0	9022	9035		3850	3850	0	3850	3880		2225	2225
9019	9019	0	9019	9038		3853	3853	0	3853	3877		1998	1998	1989	1998	0		9026	9026	0	9026	9032		3851	3851	0	3851	3879		2227	2227	0	2227	2251		9023	9023	0	9023	9034		3851	3851	0	3851	3879		2226	2226
9020	9020	0	9020	9037		3857	3857	0	3857	3872		2015	2015	2121	2015	0		9032	9032	0	9032	9026		3852	3852	0	3852	3878		2228	2228	0	2228	2250		9025	9025	0	9025	9033		3852	3852	0	3852	3878		2227	2227
9021	9021	0	9021	9036		3858	3858	0	3858	3871		2121	2121	2015	2121	0		9033	9033	0	9033	9025		3853	3853	0	3853	3877		2237	2237	2226	2237	0		9026	9026	0	9026	9032		3853	3853	0	3853	3877		2228	2228
9022	9022	0	9022	9035		3859	3859	0	3859	3870		2131	2131	2196	2131	0		9034	9034	0	9034	9023		3857	3857	0	3857	3872		2238	2238	2225	2238	0		9032	9032	0	9032	9026		3857	3857	0	3857	3872		2237	2237
9023	9023	0	9023	9034		3860	3860	0	3860	3869		2132	2132	2195	2132	0		9035	9035	0	9035	9022		3858	3858	0	3858	3871		2250	2250	0	2250	2228		9033	9033	0	9033	9025		3858	3858	0	3858	3871		2238	2238
9025	9025	0	9025	9033		3869	3869	0	3869	3860		2134	2134	2193	2134	0		9036	9036	0	9036	9021		3859	3859	0	3859	3870		2251	2251	0	2251	2227		9034	9034	0	9034	9023		3859	3859	0	3859	3870		2250	2250
9026	9026	0	9026	9032		3870	3870	0	3870	3859		2135	2135	2192	2135	0		9037	9037	0	9037	9020		3860	3860	0	3860	3869		2258	2258	0	2258	2219		9035	9035	0	9035	9022		3860	3860	0	3860	3869		2251	2251
9032	9032	0	9032	9026		3871	3871	0	3871	3858		2192	2192	2135	2192	0		9038	9038	0	9038	9019		3869	3869	0	3869	3860		2259	2259	0	2259	2218		9036	9036	0	9036	9021		3869	3869	0	3869	3860		2258	2258
9033	9033	0	9033	9025		3872	3872	0	3872	3857		2193	2193	2134	2193	0		9039	9039	0	9039	9018		3870	3870	0	3870	3859		2260	2260	0	2260	2217		9037	9037	0	9037	9020		3870	3870	0	3870	3859		2259	2259
9034	9034	0	9034	9023		3877	3877	0	3877	3853		2195	2195	2132	2195	0		9042	9042	0	9042	9057		3871	3871	0	3871	3858		2266	2266	2314	2266	0		9038	9038	0	9038	9019		3871	3871	0	3871	3858		2260	2260
9035	9035	0	9035	9022		3878	3878	0	3878	3852		2196	2196	2131	2196	0		9043	9043	0	9043	9056		3872	3872	0	3872	3857		2314	2314	2266	2314	0		9039	9039	0	9039	9018		3872	3872	0	3872	3857		2322	2322
9036	9036	0	9036	9021		3879	3879	0	3879	3851		2217	2217	0	2217	2260		9044	9044	0	9044	9055		3877	3877	0	3877	3853		2322	2322	2376	2322	0		9042	9042	0	9042	9057		3877	3877	0	3877	3853		2323	2323
9037	9037	0	9037	9020		3880	3880	0	3880	3850		2218	2218	0	2218	2259		9045	9045	0	9045	9054		3878	3878	0	3878	3852		2323	2323	2375	2323	0		9043	9043	0	9043	9056		3878	3878	0	3878	3852		2324	2324
9038	9038	0	9038	9019		3882	3882	0	3882	3848		2219	2219	0	2219	2258		9046	9046	0	9046	9053		3879	3879	0	3879	3851		2324	2324	2374	2324	0		9044	9044	0	9044	9055		3879	3879	0	3879	3851		2325	2325
9039	9039	0	9039	9018		3883	3883	0	3883	3847		2225	2225	2238	2225	0		9053	9053	0	9053	9046		3880	3880	0	3880	3850		2325	2325	2373	2325	0		9045	9045	0	9045	9054		3880	3880	0	3880	3850		2326	2326
9042	9042	0	9042	9057		3885	3885	0	3885	3845		2226	2226	2237	2226	0		9054	9054	0	9054	9045		3882	3882	0	3882	3848		2326	2326	2372	2326	0		9046	9046	0	9046	9053		3882	3882	0	3882	3848		2372	2372
9043	9043	0	9043	9056		3886	3886	0	3886	3844		2227	2227	0	2227	2251		9055	9055	0	9055	9044		3883	3883	0	3883	3847		2372	2372	2326	2372	0		9053	9053	0	9053	9046		3883	3883	0	3883	3847		2373	2373
9044	9044	0	9044	9055		3887	3887	0	3887	3843		2228	2228	0	2228	2250		9056	9056	0	9056	9043		3885	3885	0	3885	3845		2373	2373	2325	2373	0		9054	9054	0	9054	9045		3885	3885	0	3885	3845		2374	2374
9045	9045	0	9045	9054		3888	3888	0	3888	3842		2237	2237	2226	2237	0		9057	9057	0	9057	9042		3886	3886	0	3886	3844		2374	2374	2324	2374	0		9055	9055	0	9055	9044		3886	3886	0	3886	3844		2375	2375
9046	9046	0	9046	9053		3889	3889	0	3889	3841		2238	2238	2225	2238	0		9145	9145	0	9145	9165		3887	3887	0	3887	3843		2375	2375	2323	2375	0		9056	9056	0	9056	9043		3887	3887	0	3887	3843		2376	2376
9053	9053	0	9053	9046		3915	3915	0	3915	3922		2250	2250	0	2250	2228		9165	9165	0	9165	9145		3888	3888	0	3888	3842		2376	2376	2322	2376	0		9057	9057	0	9057	9042		3888	3888	0	3888	3842		2378	2378
9054	9054	0	9054	9045		3916	3916	0	3916	3921		2251	2251	0	2251	2227								3889	3889	0	3889	3841		2378	2378	0	2378	2429		9145	9145	0	9145	9165		3889	3889	0	3889	3841		2379	2379
9055	9055	0	9055	9044		3921	3921	0	3921	3916		2258	2258	0	2258	2219								3915	3915	0	3915	3922		2379	2379	0	2379	2428		9165	9165	0	9165	9145		3915	3915	0	3915	3922		2380	2380
9056	9056	0	9056	9043		3922	3922	0	3922	3915		2259	2259	0	2259	2218								3916	3916	0	3916	3921		2380	2380	0	2380	2427								3916	3916	0	3916	3921		2381	2381
9057	9057	0	9057	9042		4051	4051	4166	4051	0		2260	2260	0	2260	2217								3921	3921	0	3921	3916		2381	2381	0	2381	2426								3921	3921	0	3921	3916		2382	2382
9145	9145	0	9145	9165		4052	4052	4165	4052	0		2322	2322	2376	2322	0								3922	3922	0	3922	3915		2382	2382	0	2382	2425								3922	3922	0	3922	3915		2394	2394
9165	9165	0	9165	9145		4053	4053	4164	4053	0		2323	2323	2375	2323	0								4051	4051	4166	4051	0		2394	2394	0	2394	2413								4051	4051	4166	4051	0		2413	2413
						4054	4054	4163	4054	0		2324	2324	2374	2324	0								4052	4052	4165	4052	0		2413	2413	0	2413	2394								4052	4052	4165	4052	0		2417	2417
						4055	4055	4162	4055	0		2325	2325	2373	2325	0								4053	4053	4164	4053	0		2417	2417	2499	2417	0								4053	4053	4164	4053	0		2418	2418
						4056	4056	4161	4056	0		2326	2326	2372	2326	0								4054	4054	4163	4054	0		2418	2418	2498	2418	0								4054	4054	4163	4054	0		2425	2425
						4161	4161	4056	4161	0		2372	2372	2326	2372	0								4055	4055	4162	4055	0		2425	2425	2491	2425	2382								4055	4055	4162	4055	0		2426	2426
						4162	4162	4055	4162	0		2373	2373	2325	2373	0								4056	4056	4161	4056	0		2426	2426	2490	2426	2381								4056	4056	4161	4056	0		2427	2427
						4163	4163	4054	4163	0		2374	2374	2324	2374	0								4161	4161	4056	4161	0		2427	2427	2489	2427	2380								4161	4161	4056	4161	0		2428	2428
						4164	4164	4053	4164	0		2375	2375	2323	2375	0								4162	4162	4055	4162	0		2428	2428	2488	2428	2379								4162	4162	4055	4162	0		2429	2429
						4165	4165	4052	4165	0		2376	2376	2322	2376	0								4163	4163	4054	4163	0		2429	2429	2487	2429	2378								4163	4163	4054	4163	0		2487	2487
						4166	4166	4051	4166	0		2378	2378	0	2378	2429								4164	4164	4053	4164	0		2487	2487	2429	2487	0								4164	4164	4053	4164	0		2488	2488
						4554	4554	0	4554	4603		2379	2379	0	2379	2428								4165	4165	4052	4165	0		2488	2488	2428	2488	0								4165	4165	4052	4165	0		2489	2489
						4555	4555	0	4555	4602		2380	2380	0	2380	2427								4166	4166	4051	4166	0		2489	2489	2427	2489	0								4166	4166	4051	4166	0		2490	2490
						4556	4556	0	4556	4601		2381	2381	0	2381	2426								4554	4554	0	4554	4603		2490	2490	2426	2490	0								4554	4554	0	4554	4603		2491	2491
						4557	4557	0	4557	4600		2382	2382	0	2382	2425								4555	4555	0	4555	4602		2491	2491	2425	2491	0								4555	4555	0	4555	4602		2498	2498
						4558	4558	0	4558	4599		2394	2394	0	2394	2413								4556	4556	0	4556	4601		2498	2498	2418	2498	0								4556	4556	0	4556	4601		2499	2499
						4569	4569	0	4569	4589		2413	2413	0	2413	2394								4557	4557	0	4557	4600		2499	2499	2417	2499	0								4557	4557	0	4557	4600		2518	2518
						4570	4570	0	4570	4588		2417	2417	2499	2417	0								4558	4558	0	4558	4599		2518	2518	2528	2518	0								4558	4558	0	4558	4599		2519	2519
						4573	4573	0	4573	4586		2418	2418	2498	2418	0								4569	4569	0	4569	4589		2519	2519	2527	2519	0								4569	4569	0	4569	4589		2520	2520
						4574	4574	0	4574	4585		2425	2425	2491	2425	2382								4570	4570	0	4570	4588		2520	2520	2526	2520	0								4570	4570	0	4570	4588		2526	2526
						4575	4575	0	4575	4584		2426	2426	2490	2426	2381								4573	4573	0	4573	4586		2526	2526	2520	2526	0								4573	4573	0	4573	4586		2527	2527
						4576	4576	0	4576	4583		2427	2427	2489	2427	2380								4574	4574	0	4574	4585		2527	2527	2519	2527	0								4574	4574	0	4574	4585		2528	2528
						4583	4583	0	4583	4576		2428	2428	2488	2428	2379								4575	4575	0	4575	4584		2528	2528	2518	2528	0								4575	4575	0	4575	4584		2558	2558
						4584	4584	0	4584	4575		2429	2429	2487	2429	2378								4576	4576	0	4576	4583		2558	2558	0	2558	2565								4576	4576	0	4576	4583		2559	2559
						4585	4585	0	4585	4574		2487	2487	2429	2487	0								4583	4583	0	4583	4576		2559	2559	0	2559	2564								4583	4583	0	4583	4576		2564	2564
						4586	4586	0	4586	4573		2488	2488	2428	2488	0								4584	4584	0	4584	4575		2564	2564	0	2564	2559								4584	4584	0	4584	4575		2565	2565
						4588	4588	0	4588	4570		2489	2489	2427	2489	0								4585	4585	0	4585	4574		2565	2565	0	2565	2558								4585	4585	0	4585	4574		2570	2570
						4589	4589	0	4589	4569		2490	2490	2426	2490	0								4586	4586	0	4586	4573		2570	2570	2581	2570	0								4586	4586	0	4586	4573		2571	2571
						4599	4599	0	4599	4558		2491	2491	2425	2491	0								4588	4588	0	4588	4570		2572	2572	0	2572	2579								4588	4588	0	4588	4570		2572	2572
						4600	4600	0	4600	4557		2498	2498	2418	2498	0								4589	4589	0	4589	4569		2573	2573	0	2573	2578								4589	4589	0	4589	4569		2573	2573
						4601	4601	0	4601	4556		2499	2499	2417	2499	0								4599	4599	0	4599	4558		2578	2578	0	2578	2573								4599	4599	0	4599	4558		2578	2578
						4602	4602	0	4602	4555		2518	2518	2528	2518	0								4600	4600	0	4600	4557		2579	2579	0	2579	2572								4600	4600	0	4600	4557		2579	2579
						4603	4603	0	4603	4554		2519	2519	2527	2519	0								4601	4601	0	4601	4556		2581	2581	2570	2581	0								4601	4601	0	4601	4556		2580	2580
						4676	4676	0	4676	4751		2520	2520	2526	2520	0								4602	4602	0	4602	4555		2778	2778	2805	2778	0								4602	4602	0	4602	4555		2581	2581
						4686	4686	0	4686	4742		2526	2526	2520	2526	0								4603	4603	0	4603	4554		2779	2779	2804	2779	0								4603	4603	0	4603	4554		2778	2778
						4694	4694	0	4694	4732		2527	2527	2519	2527	0								4676	4676	0	4676	4751		2804	2804	2779	2804	0								4676	4676	0	4676	4751		2779	2779
						4695	4695	0	4695	4731		2528	2528	2518	2528	0								4686	4686	0	4686	4742		2805	2805	2778	2805	0								4686	4686	0	4686	4742		2804	2804
						4696	4696	0	4696	4730		2558	2558	0	2558	2565								4694	4694	0	4694	4732		2849	2849	0	2849	2893								4694	4694	0	4694	4732		2805	2805
						4698	4698	0	4698	4728		2559	2559	0	2559	2564								4695	4695	0	4695	4731		2851	2851	0	2851	2891								4695	4695	0	4695	4731		2849	2849
						4699	4699	0	4699	4727		2564	2564	0	2564	2559								4696	4696	0	4696	4730		2856	2856	0	2856	2888								4696	4696	0	4696	4730		2851	2851
						4700	4700	0	4700	4726		2565	2565	0	2565	2558								4698	4698	0	4698	4728		2857	2857	0	2857	2887								4698	4698	0	4698	4728		2856	2856
						4701	4701	0	4701	4725		2570	2570	2581	2570	0								4699	4699	0	4699	4727		2867	2867	0	2867	2876								4699	4699	0	4699	4727		2857	2857
						4725	4725	0	4725	4701		2572	2572	0	2572	2579								4700	4700	0	4700	4726		2876	2876	0	2876	2867								4700	4700	0	4700	4726		2867	2867
						4726	4726	0	4726	4700		2573	2573	0	2573	2578								4701	4701	0	4701	4725		2887	2887	0	2887	2857								4701	4701	0	4701	4725		2876	2876
						4727	4727	0	4727	4699		2578	2578	0	2578	2573								4725	4725	0	4725	4701		2888	2888	0	2888	2856								4725	4725	0	4725	4701		2887	2887
						4728	4728	0	4728	4698		2579	2579	0	2579	2572								4726	4726	0	4726	4700		2891	2891	0	2891	2851								4726	4726	0	4726	4700		2888	2888
						4730	4730	0	4730	4696		2581	2581	2570	2581	0								4727	4727	0	4727	4699		2893	2893	0	2893	2849								4727	4727	0	4727	4699		2891	2891
						4731	4731	0	4731	4695		2778	2778	2805	2778	0								4728	4728	0	4728	4698		2909	2909	2927	2909	0								4728	4728	0	4728	4698		2893	2893
						4732	4732	0	4732	4694		2805	2805	2778	2805	0								4730	4730	0	4730	4696		2927	2927	2909	2927	0								4730	4730	0	4730	4696		2909	2909
						4742	4742	0	4742	4686		2849	2849	0	2849	2893								4731	4731	0	4731	4695		2935	2935	2974	2935	0								4731	4731	0	4731	4695		2927	2927
						4751	4751	0	4751	4676		2851	2851	0	2851	2891								4732	4732	0	4732	4694		2936	2936	2973	2936	0								4732	4732	0	4732	4694		2935	2935
						4754	4754	0	4754	4770		2856	2856	0	2856	2888								4742	4742	0	4742	4686		2946	2946	0	2946	3057								4742	4742	0	4742	4686		2936	2936
						4755	4755	0	4755	4769		2857	2857	0	2857	2887								4751	4751	0	4751	4676		2947	2947	3057	2947	3056								4751	4751	0	4751	4676		2946	2946
						4756	4756	0	4756	4768		2867	2867	0	2867	2876								4754	4754	0	4754	4770		2948	2948	3056	2948	3055								4754	4754	0	4754	4770		2947	2947
						4757	4757	0	4757	4767		2876	2876	0	2876	2867								4755	4755	0	4755	4769		2949	2949	3055	2949	0								4755	4755	0	4755	4769		2948	2948
						4758	4758	0	4758	4766		2887	2887	0	2887	2857								4756	4756	0	4756	4768		2957	2957	3075	2957	3047								4756	4756	0	4756	4768		2949	2949
						4759	4759	0	4759	4765		2888	2888	0	2888	2856								4757	4757	0	4757	4767		2958	2958	3074	2958	3046								4757	4757	0	4757	4767		2957	2957
						4765	4765	0	4765	4759		2891	2891	0	2891	2851								4758	4758	0	4758	4766		2972	2972	0	2972	3038								4758	4758	0	4758	4766		2958	2958
						4766	4766	0	4766	4758		2893	2893	0	2893	2849								4759	4759	0	4759	4765		2973	2973	2936	2973	3037								4759	4759	0	4759	4765		2972	2972
						4767	4767	0	4767	4757		2909	2909	2927	2909	0								4765	4765	0	4765	4759		2974	2974	2935	2974	3036								4765	4765	0	4765	4759		2973	2973
						4768	4768	0	4768	4756		2915	2915	2940	2915	0								4766	4766	0	4766	4758		2975	2975	3092	2975	3035								4766	4766	0	4766	4758		2974	2974
						4769	4769	0	4769	4755		2927	2927	2909	2927	0								4767	4767	0	4767	4757		2976	2976	3091	2976	3034								4767	4767	0	4767	4757		2975	2975
						4770	4770	0	4770	4754		2935	2935	2974	2935	0								4768	4768	0	4768	4756		2978	2978	0	2978	3008								4768	4768	0	4768	4756		2976	2976
						5066	5066	5144	5066	0		2936	2936	2973	2936	0								4769	4769	0	4769	4755		2979	2979	0	2979	3007								4769	4769	0	4769	4755		2978	2978
						5067	5067	5143	5067	0		2940	2940	2915	2940	0								4770	4770	0	4770	4754		2982	2982	0	2982	3004								4770	4770	0	4770	4754		2979	2979
						5070	5070	5140	5070	0		2946	2946	0	2946	3057								4960	4960	0	4960	4980		2983	2983	0	2983	3003								4961	4961	0	4961	4979		2982	2982
						5071	5071	5139	5071	0		2947	2947	3057	2947	3056								4961	4961	0	4961	4979		2984	2984	0	2984	3002								4962	4962	0	4962	4978		2983	2983
						5139	5139	5071	5139	0		2948	2948	3056	2948	3055								4962	4962	0	4962	4978		2990	2990	3100	2990	0								4963	4963	0	4963	4977		2984	2984
						5140	5140	5070	5140	0		2949	2949	3055	2949	0								4963	4963	0	4963	4977		2991	2991	3099	2991	0								4964	4964	0	4964	4976		2990	2990
						5143	5143	5067	5143	0		2957	2957	3075	2957	3047								4964	4964	0	4964	4976		3002	3002	0	3002	2984								4965	4965	0	4965	4975		2991	2991
						5144	5144	5066	5144	0		2958	2958	3074	2958	3046								4965	4965	0	4965	4975		3003	3003	3102	3003	2983								4975	4975	0	4975	4965		3002	3002
						5146	5146	0	5146	5216		2972	2972	0	2972	3038								4975	4975	0	4975	4965		3004	3004	3101	3004	2982								4976	4976	0	4976	4964		3003	3003
						5147	5147	0	5147	5215		2973	2973	2936	2973	3037								4976	4976	0	4976	4964		3007	3007	0	3007	2979								4977	4977	0	4977	4963		3004	3004
						5159	5159	0	5159	5196		2974	2974	2935	2974	3036								4977	4977	0	4977	4963		3008	3008	0	3008	2978								4978	4978	0	4978	4962		3007	3007
						5160	5160	0	5160	5195		2975	2975	3092	2975	3035								4978	4978	0	4978	4962		3012	3012	3036	3012	0								4979	4979	0	4979	4961		3008	3008
						5161	5161	0	5161	5194		2976	2976	3091	2976	3034								4979	4979	0	4979	4961		3013	3013	3035	3013	0								5066	5066	5144	5066	0		3012	3012
						5167	5167	5188	5167	0		2978	2978	0	2978	3008								4980	4980	0	4980	4960		3034	3034	0	3034	2976								5067	5067	5143	5067	0		3013	3013
						5168	5168	5187	5168	0		2979	2979	0	2979	3007								5066	5066	5144	5066	0		3035	3035	3013	3035	2975								5070	5070	5140	5070	0		3034	3034
						5169	5169	5186	5169	0		2982	2982	0	2982	3004								5067	5067	5143	5067	0		3036	3036	3012	3036	2974								5071	5071	5139	5071	0		3035	3035
						5170	5170	5185	5170	0		2983	2983	0	2983	3003								5070	5070	5140	5070	0		3037	3037	0	3037	2973								5139	5139	5071	5139	0		3036	3036
						5171	5171	5184	5171	0		2984	2984	0	2984	3002								5071	5071	5139	5071	0		3038	3038	0	3038	2972								5140	5140	5070	5140	0		3037	3037
						5172	5172	5183	5172	0		2990	2990	3100	2990	0								5139	5139	5071	5139	0		3046	3046	0	3046	2958								5143	5143	5067	5143	0		3038	3038
						5173	5173	5182	5173	0		2991	2991	3099	2991	0								5140	5140	5070	5140	0		3047	3047	0	3047	2957								5144	5144	5066	5144	0		3046	3046
						5174	5174	5181	5174	0		3002	3002	0	3002	2984								5143	5143	5067	5143	0		3055	3055	2949	3055	2948								5146	5146	0	5146	5216		3047	3047
						5181	5181	5174	5181	0		3003	3003	3102	3003	2983								5144	5144	5066	5144	0		3056	3056	2948	3056	2947								5147	5147	0	5147	5215		3055	3055
						5182	5182	5173	5182	0		3004	3004	3101	3004	2982								5146	5146	0	5146	5216		3057	3057	2947	3057	2946								5159	5159	0	5159	5196		3056	3056
						5183	5183	5172	5183	0		3007	3007	0	3007	2979								5147	5147	0	5147	5215		3074	3074	2958	3074	0								5160	5160	0	5160	5195		3057	3057
						5184	5184	5171	5184	0		3008	3008	0	3008	2978								5159	5159	0	5159	5196		3075	3075	2957	3075	0								5161	5161	0	5161	5194		3074	3074
						5185	5185	5170	5185	0		3012	3012	3036	3012	0								5160	5160	0	5160	5195		3087	3087	3181	3087	0								5167	5167	5188	5167	0		3075	3075
						5186	5186	5169	5186	0		3013	3013	3035	3013	0								5161	5161	0	5161	5194		3091	3091	2976	3091	0								5168	5168	5187	5168	0		3087	3087
						5187	5187	5168	5187	0		3034	3034	0	3034	2976								5167	5167	5188	5167	0		3092	3092	2975	3092	0								5169	5169	5186	5169	0		3091	3091
						5188	5188	5167	5188	0		3035	3035	3013	3035	2975								5168	5168	5187	5168	0		3099	3099	2991	3099	0								5170	5170	5185	5170	0		3092	3092
						5194	5194	0	5194	5161		3036	3036	3012	3036	2974								5169	5169	5186	5169	0		3100	3100	2990	3100	0								5171	5171	5184	5171	0		3099	3099
						5195	5195	0	5195	5160		3037	3037	0	3037	2973								5170	5170	5185	5170	0		3101	3101	3004	3101	0								5172	5172	5183	5172	0		3100	3100
						5196	5196	0	5196	5159		3038	3038	0	3038	2972								5171	5171	5184	5171	0		3102	3102	3003	3102	0								5173	5173	5182	5173	0		3101	3101
						5215	5215	0	5215	5147		3046	3046	0	3046	2958								5172	5172	5183	5172	0		3108	3108	3158	3108	0								5174	5174	5181	5174	0		3102	3102
						5216	5216	0	5216	5146		3047	3047	0	3047	2957								5173	5173	5182	5173	0		3109	3109	3157	3109	0								5181	5181	5174	5181	0		3108	3108
						5314	5314	0	5314	5379		3055	3055	2949	3055	2948								5174	5174	5181	5174	0		3110	3110	3156	3110	0								5182	5182	5173	5182	0		3109	3109
						5315	5315	0	5315	5378		3056	3056	2948	3056	2947								5181	5181	5174	5181	0		3111	3111	3155	3111	0								5183	5183	5172	5183	0		3110	3110
						5316	5316	0	5316	5377		3057	3057	2947	3057	2946								5182	5182	5173	5182	0		3139	3139	3150	3139	0								5184	5184	5171	5184	0		3111	3111
						5319	5319	0	5319	5374		3074	3074	2958	3074	0								5183	5183	5172	5183	0		3150	3150	3139	3150	0								5185	5185	5170	5185	0		3139	3139
						5325	5325	0	5325	5366		3075	3075	2957	3075	0								5184	5184	5171	5184	0		3155	3155	3111	3155	0								5186	5186	5169	5186	0		3150	3150
						5326	5326	0	5326	5365		3087	3087	3181	3087	0								5185	5185	5170	5185	0		3156	3156	3110	3156	0								5187	5187	5168	5187	0		3155	3155
						5365	5365	0	5365	5326		3091	3091	2976	3091	0								5186	5186	5169	5186	0		3157	3157	3109	3157	0								5188	5188	5167	5188	0		3156	3156
						5366	5366	0	5366	5325		3092	3092	2975	3092	0								5187	5187	5168	5187	0		3158	3158	3108	3158	0								5194	5194	0	5194	5161		3157	3157
						5374	5374	0	5374	5319		3099	3099	2991	3099	0								5188	5188	5167	5188	0		3176	3176	0	3176	3190								5195	5195	0	5195	5160		3158	3158
						5377	5377	0	5377	5316		3100	3100	2990	3100	0								5194	5194	0	5194	5161		3177	3177	0	3177	3189								5196	5196	0	5196	5159		3176	3176
						5378	5378	0	5378	5315		3101	3101	3004	3101	0								5195	5195	0	5195	5160		3178	3178	0	3178	3188								5215	5215	0	5215	5147		3177	3177
						5379	5379	0	5379	5314		3102	3102	3003	3102	0								5196	5196	0	5196	5159		3179	3179	0	3179	3187								5216	5216	0	5216	5146		3178	3178
						5384	5384	0	5384	5438		3108	3108	3158	3108	0								5215	5215	0	5215	5147		3181	3181	3087	3181	0								5314	5314	0	5314	5379		3179	3179
						5385	5385	0	5385	5437		3109	3109	3157	3109	0								5216	5216	0	5216	5146		3187	3187	0	3187	3179								5315	5315	0	5315	5378		3181	3181
						5386	5386	0	5386	5436		3110	3110	3156	3110	0								5314	5314	0	5314	5379		3188	3188	0	3188	3178								5316	5316	0	5316	5377		3187	3187
						5387	5387	0	5387	5435		3111	3111	3155	3111	0								5315	5315	0	5315	5378		3189	3189	0	3189	3177								5319	5319	0	5319	5374		3188	3188
						5388	5388	0	5388	5434		3139	3139	3150	3139	0								5316	5316	0	5316	5377		3190	3190	0	3190	3176								5325	5325	0	5325	5366		3189	3189
						5395	5395	0	5395	5428		3150	3150	3139	3150	0								5319	5319	0	5319	5374		3205	3205	3314	3205	3223								5326	5326	0	5326	5365		3190	3190
						5397	5397	0	5397	5426		3155	3155	3111	3155	0								5325	5325	0	5325	5366		3206	3206	0	3206	3222								5365	5365	0	5365	5326		3205	3205
						5398	5398	0	5398	5425		3156	3156	3110	3156	0								5326	5326	0	5326	5365		3207	3207	3312	3207	3221								5366	5366	0	5366	5325		3206	3206
						5404	5404	0	5404	5419		3157	3157	3109	3157	0								5365	5365	0	5365	5326		3208	3208	3311	3208	0								5374	5374	0	5374	5319		3207	3207
						5405	5405	0	5405	5418		3158	3158	3108	3158	0								5366	5366	0	5366	5325		3209	3209	3310	3209	0								5377	5377	0	5377	5316		3208	3208
						5406	5406	0	5406	5417		3176	3176	0	3176	3190								5374	5374	0	5374	5319		3210	3210	3309	3210	0								5378	5378	0	5378	5315		3209	3209
						5407	5407	0	5407	5416		3177	3177	0	3177	3189								5377	5377	0	5377	5316		3211	3211	3308	3211	0								5379	5379	0	5379	5314		3210	3210
						5408	5408	0	5408	5415		3178	3178	0	3178	3188								5378	5378	0	5378	5315		3212	3212	3307	3212	0								5384	5384	0	5384	5438		3211	3211
						5409	5409	0	5409	5414		3179	3179	0	3179	3187								5379	5379	0	5379	5314		3221	3221	0	3221	3207								5385	5385	0	5385	5437		3212	3212
						5414	5414	0	5414	5409		3181	3181	3087	3181	0								5384	5384	0	5384	5438		3222	3222	3301	3222	3206								5386	5386	0	5386	5436		3221	3221
						5415	5415	0	5415	5408		3187	3187	0	3187	3179								5385	5385	0	5385	5437		3223	3223	3300	3223	3205								5387	5387	0	5387	5435		3222	3222
						5416	5416	0	5416	5407		3188	3188	0	3188	3178								5386	5386	0	5386	5436		3224	3224	3299	3224	0								5388	5388	0	5388	5434		3223	3223
						5417	5417	0	5417	5406		3189	3189	0	3189	3177								5387	5387	0	5387	5435		3225	3225	3298	3225	0								5395	5395	0	5395	5428		3224	3224
						5418	5418	0	5418	5405		3190	3190	0	3190	3176								5388	5388	0	5388	5434		3285	3285	3297	3285	0								5397	5397	0	5397	5426		3225	3225
						5419	5419	0	5419	5404		3205	3205	3314	3205	3223								5395	5395	0	5395	5428		3286	3286	3296	3286	0								5398	5398	0	5398	5425		3285	3285
						5425	5425	0	5425	5398		3206	3206	0	3206	3222								5397	5397	0	5397	5426		3287	3287	3295	3287	0								5404	5404	0	5404	5419		3286	3286
						5426	5426	0	5426	5397		3207	3207	3312	3207	3221								5398	5398	0	5398	5425		3295	3295	3287	3295	0								5405	5405	0	5405	5418		3287	3287
						5428	5428	0	5428	5395		3208	3208	3311	3208	0								5404	5404	0	5404	5419		3296	3296	3286	3296	0								5406	5406	0	5406	5417		3295	3295
						5434	5434	0	5434	5388		3209	3209	3310	3209	0								5405	5405	0	5405	5418		3297	3297	3285	3297	0								5407	5407	0	5407	5416		3296	3296
						5435	5435	0	5435	5387		3210	3210	3309	3210	0								5406	5406	0	5406	5417		3298	3298	3225	3298	0								5408	5408	0	5408	5415		3297	3297
						5436	5436	0	5436	5386		3211	3211	3308	3211	0								5407	5407	0	5407	5416		3299	3299	3224	3299	0								5409	5409	0	5409	5414		3298	3298
						5437	5437	0	5437	5385		3212	3212	3307	3212	0								5408	5408	0	5408	5415		3300	3300	3223	3300	3357								5414	5414	0	5414	5409		3299	3299
						5438	5438	0	5438	5384		3221	3221	0	3221	3207								5409	5409	0	5409	5414		3301	3301	3222	3301	3356								5415	5415	0	5415	5408		3300	3300
						5447	5447	0	5447	5458		3222	3222	3301	3222	3206								5414	5414	0	5414	5409		3307	3307	3212	3307	3351								5416	5416	0	5416	5407		3301	3301
						5448	5448	0	5448	5457		3223	3223	3300	3223	3205								5415	5415	0	5415	5408		3308	3308	3211	3308	3350								5417	5417	0	5417	5406		3307	3307
						5449	5449	0	5449	5456		3224	3224	3299	3224	0								5416	5416	0	5416	5407		3309	3309	3210	3309	3349								5418	5418	0	5418	5405		3308	3308
						5450	5450	0	5450	5455		3225	3225	3298	3225	0								5417	5417	0	5417	5406		3310	3310	3209	3310	3348								5419	5419	0	5419	5404		3309	3309
						5455	5455	0	5455	5450		3285	3285	3297	3285	0								5418	5418	0	5418	5405		3311	3311	3208	3311	3347								5425	5425	0	5425	5398		3310	3310
						5456	5456	0	5456	5449		3286	3286	3296	3286	0								5419	5419	0	5419	5404		3312	3312	3207	3312	3346								5426	5426	0	5426	5397		3311	3311
						5457	5457	0	5457	5448		3287	3287	3295	3287	0								5425	5425	0	5425	5398		3313	3313	0	3313	3345								5428	5428	0	5428	5395		3312	3312
						5458	5458	0	5458	5447		3295	3295	3287	3295	0								5426	5426	0	5426	5397		3314	3314	3205	3314	3344								5434	5434	0	5434	5388		3313	3313
						5750	5750	0	5750	5856		3296	3296	3286	3296	0								5428	5428	0	5428	5395		3315	3315	0	3315	3343								5435	5435	0	5435	5387		3314	3314
						5751	5751	0	5751	5855		3297	3297	3285	3297	0								5434	5434	0	5434	5388		3316	3316	0	3316	3342								5436	5436	0	5436	5386		3315	3315
						5752	5752	0	5752	5854		3298	3298	3225	3298	0								5435	5435	0	5435	5387		3317	3317	0	3317	3341								5437	5437	0	5437	5385		3316	3316
						5854	5854	0	5854	5752		3299	3299	3224	3299	0								5436	5436	0	5436	5386		3318	3318	0	3318	3340								5438	5438	0	5438	5384		3317	3317
						5855	5855	0	5855	5751		3300	3300	3223	3300	3357								5437	5437	0	5437	5385		3321	3321	0	3321	3337								5447	5447	0	5447	5458		3318	3318
						5856	5856	0	5856	5750		3301	3301	3222	3301	3356								5438	5438	0	5438	5384		3322	3322	0	3322	3336								5448	5448	0	5448	5457		3321	3321
						5889	5889	6001	5889	0		3307	3307	3212	3307	3351								5447	5447	0	5447	5458		3336	3336	0	3336	3322								5449	5449	0	5449	5456		3322	3322
						5904	5904	0	5904	5913		3308	3308	3211	3308	3350								5448	5448	0	5448	5457		3337	3337	0	3337	3321								5450	5450	0	5450	5455		3336	3336
						5905	5905	0	5905	5912		3309	3309	3210	3309	3349								5449	5449	0	5449	5456		3340	3340	0	3340	3318								5455	5455	0	5455	5450		3337	3337
						5911	5911	6026	5911	0		3310	3310	3209	3310	3348								5450	5450	0	5450	5455		3341	3341	0	3341	3317								5456	5456	0	5456	5449		3340	3340
						5912	5912	6025	5912	5905		3311	3311	3208	3311	3347								5455	5455	0	5455	5450		3342	3342	0	3342	3316								5457	5457	0	5457	5448		3341	3341
						5913	5913	6024	5913	5904		3312	3312	3207	3312	3346								5456	5456	0	5456	5449		3343	3343	0	3343	3315								5458	5458	0	5458	5447		3342	3342
						5914	5914	6023	5914	0		3313	3313	0	3313	3345								5457	5457	0	5457	5448		3344	3344	0	3344	3314								5750	5750	0	5750	5856		3343	3343
						5931	5931	0	5931	5952		3314	3314	3205	3314	3344								5458	5458	0	5458	5447		3345	3345	0	3345	3313								5751	5751	0	5751	5855		3344	3344
						5932	5932	0	5932	5951		3315	3315	0	3315	3343								5750	5750	0	5750	5856		3346	3346	0	3346	3312								5752	5752	0	5752	5854		3345	3345
						5933	5933	0	5933	5950		3316	3316	0	3316	3342								5751	5751	0	5751	5855		3347	3347	0	3347	3311								5854	5854	0	5854	5752		3346	3346
						5934	5934	0	5934	5949		3317	3317	0	3317	3341								5752	5752	0	5752	5854		3348	3348	0	3348	3310								5855	5855	0	5855	5751		3347	3347
						5936	5936	0	5936	5947		3318	3318	0	3318	3340								5854	5854	0	5854	5752		3349	3349	0	3349	3309								5856	5856	0	5856	5750		3348	3348
						5937	5937	0	5937	5946		3321	3321	0	3321	3337								5855	5855	0	5855	5751		3350	3350	0	3350	3308								5889	5889	6001	5889	0		3349	3349
						5938	5938	0	5938	5945		3322	3322	0	3322	3336								5856	5856	0	5856	5750		3351	3351	0	3351	3307								5904	5904	0	5904	5913		3350	3350
						5939	5939	0	5939	5944		3336	3336	0	3336	3322								5889	5889	6001	5889	0		3356	3356	0	3356	3301								5905	5905	0	5905	5912		3351	3351
						5944	5944	0	5944	5939		3337	3337	0	3337	3321								5904	5904	0	5904	5913		3357	3357	0	3357	3300								5911	5911	6026	5911	0		3356	3356
						5945	5945	0	5945	5938		3340	3340	0	3340	3318								5905	5905	0	5905	5912		3380	3380	3474	3380	0								5912	5912	0	5912	5905		3357	3357
						5946	5946	0	5946	5937		3341	3341	0	3341	3317								5911	5911	6026	5911	0		3389	3389	3411	3389	0								5913	5913	0	5913	5904		3380	3380
						5947	5947	0	5947	5936		3342	3342	0	3342	3316								5912	5912	6025	5912	5905		3395	3395	0	3395	3424								5914	5914	6023	5914	0		3389	3389
						5949	5949	0	5949	5934		3343	3343	0	3343	3315								5913	5913	6024	5913	5904		3396	3396	0	3396	3423								5931	5931	0	5931	5952		3395	3395
						5950	5950	0	5950	5933		3344	3344	0	3344	3314								5914	5914	6023	5914	0		3398	3398	0	3398	3418								5932	5932	0	5932	5951		3396	3396
						5951	5951	0	5951	5932		3345	3345	0	3345	3313								5931	5931	0	5931	5952		3399	3399	0	3399	3417								5933	5933	0	5933	5950		3398	3398
						5952	5952	0	5952	5931		3346	3346	0	3346	3312								5932	5932	0	5932	5951		3400	3400	0	3400	3416								5934	5934	0	5934	5949		3399	3399
						5958	5958	0	5958	5993		3347	3347	0	3347	3311								5933	5933	0	5933	5950		3401	3401	0	3401	3415								5936	5936	0	5936	5947		3400	3400
						5959	5959	0	5959	5992		3348	3348	0	3348	3310								5934	5934	0	5934	5949		3402	3402	0	3402	3414								5937	5937	0	5937	5946		3401	3401
						5960	5960	0	5960	5991		3349	3349	0	3349	3309								5936	5936	0	5936	5947		3403	3403	0	3403	3413								5938	5938	0	5938	5945		3402	3402
						5961	5961	0	5961	5990		3350	3350	0	3350	3308								5937	5937	0	5937	5946		3404	3404	0	3404	3412								5939	5939	0	5939	5944		3403	3403
						5962	5962	0	5962	5989		3351	3351	0	3351	3307								5938	5938	0	5938	5945		3411	3411	3389	3411	0								5944	5944	0	5944	5939		3404	3404
						5963	5963	0	5963	5988		3356	3356	0	3356	3301								5939	5939	0	5939	5944		3412	3412	0	3412	3404								5945	5945	0	5945	5938		3411	3411
						5972	5972	0	5972	5986		3357	3357	0	3357	3300								5944	5944	0	5944	5939		3413	3413	0	3413	3403								5946	5946	0	5946	5937		3412	3412
						5973	5973	0	5973	5985		3370	3370	3396	3370	0								5945	5945	0	5945	5938		3414	3414	0	3414	3402								5947	5947	0	5947	5936		3413	3413
						5985	5985	0	5985	5973		3371	3371	3395	3371	0								5946	5946	0	5946	5937		3415	3415	0	3415	3401								5949	5949	0	5949	5934		3414	3414
						5986	5986	0	5986	5972		3372	3372	3394	3372	0								5947	5947	0	5947	5936		3416	3416	0	3416	3400								5950	5950	0	5950	5933		3415	3415
						5988	5988	0	5988	5963		3373	3373	3393	3373	0								5949	5949	0	5949	5934		3417	3417	0	3417	3399								5951	5951	0	5951	5932		3416	3416
						5989	5989	0	5989	5962		3389	3389	3411	3389	0								5950	5950	0	5950	5933		3418	3418	0	3418	3398								5952	5952	0	5952	5931		3417	3417
						5990	5990	0	5990	5961		3393	3393	3373	3393	0								5951	5951	0	5951	5932		3423	3423	0	3423	3396								5958	5958	0	5958	5993		3418	3418
						5991	5991	0	5991	5960		3394	3394	3372	3394	0								5952	5952	0	5952	5931		3424	3424	0	3424	3395								5959	5959	0	5959	5992		3423	3423
						5992	5992	0	5992	5959		3395	3395	3371	3395	3424								5958	5958	0	5958	5993		3447	3447	3560	3447	0								5960	5960	0	5960	5991		3424	3424
						5993	5993	0	5993	5958		3396	3396	3370	3396	3423								5959	5959	0	5959	5992		3448	3448	3559	3448	0								5961	5961	0	5961	5990		3447	3447
						6001	6001	5889	6001	0		3398	3398	0	3398	3418								5960	5960	0	5960	5991		3449	3449	3558	3449	0								5962	5962	0	5962	5989		3448	3448
						6023	6023	5914	6023	0		3399	3399	0	3399	3417								5961	5961	0	5961	5990		3455	3455	3552	3455	0								5963	5963	0	5963	5988		3449	3449
						6024	6024	5913	6024	0		3400	3400	0	3400	3416								5962	5962	0	5962	5989		3456	3456	3551	3456	0								5972	5972	0	5972	5986		3455	3455
						6025	6025	5912	6025	0		3401	3401	0	3401	3415								5963	5963	0	5963	5988		3457	3457	3550	3457	0								5973	5973	0	5973	5985		3456	3456
						6026	6026	5911	6026	0		3402	3402	0	3402	3414								5972	5972	0	5972	5986		3458	3458	3549	3458	0								5985	5985	0	5985	5973		3457	3457
						6197	6197	6258	6197	0		3403	3403	0	3403	3413								5973	5973	0	5973	5985		3459	3459	3548	3459	3473								5986	5986	0	5986	5972		3458	3458
						6198	6198	0	6198	6257		3404	3404	0	3404	3412								5985	5985	0	5985	5973		3460	3460	0	3460	3472								5988	5988	0	5988	5963		3459	3459
						6201	6201	0	6201	6254		3411	3411	3389	3411	0								5986	5986	0	5986	5972		3461	3461	3546	3461	0								5989	5989	0	5989	5962		3460	3460
						6206	6206	0	6206	6250		3412	3412	0	3412	3404								5988	5988	0	5988	5963		3462	3462	3518	3462	0								5990	5990	0	5990	5961		3461	3461
						6207	6207	0	6207	6249		3413	3413	0	3413	3403								5989	5989	0	5989	5962		3463	3463	3517	3463	0								5991	5991	0	5991	5960		3462	3462
						6208	6208	0	6208	6248		3414	3414	0	3414	3402								5990	5990	0	5990	5961		3464	3464	3516	3464	0								5992	5992	0	5992	5959		3463	3463
						6209	6209	0	6209	6247		3415	3415	0	3415	3401								5991	5991	0	5991	5960		3466	3466	3514	3466	0								5993	5993	0	5993	5958		3464	3464
						6210	6210	0	6210	6246		3416	3416	0	3416	3400								5992	5992	0	5992	5959		3471	3471	3506	3471	0								6001	6001	5889	6001	0		3466	3466
						6212	6212	0	6212	6244		3417	3417	0	3417	3399								5993	5993	0	5993	5958		3472	3472	3505	3472	3460								6023	6023	5914	6023	0		3471	3471
						6213	6213	0	6213	6243		3418	3418	0	3418	3398								6001	6001	5889	6001	0		3473	3473	3504	3473	3459								6026	6026	5911	6026	0		3472	3472
						6214	6214	0	6214	6242		3423	3423	0	3423	3396								6023	6023	5914	6023	0		3474	3474	3380	3474	0								6197	6197	6258	6197	0		3473	3473
						6215	6215	0	6215	6241		3424	3424	0	3424	3395								6024	6024	5913	6024	0		3475	3475	3553	3475	0								6206	6206	0	6206	6250		3474	3474
						6220	6220	0	6220	6240		3447	3447	3560	3447	0								6025	6025	5912	6025	0		3485	3485	3494	3485	0								6207	6207	0	6207	6249		3475	3475
						6221	6221	0	6221	6239		3448	3448	3559	3448	0								6026	6026	5911	6026	0		3486	3486	3493	3486	0								6208	6208	0	6208	6248		3485	3485
						6222	6222	0	6222	6238		3449	3449	3558	3449	0								6197	6197	6258	6197	0		3487	3487	3492	3487	0								6209	6209	0	6209	6247		3486	3486
						6223	6223	0	6223	6237		3455	3455	3552	3455	0								6198	6198	0	6198	6257		3492	3492	3487	3492	0								6210	6210	0	6210	6246		3487	3487
						6224	6224	0	6224	6235		3456	3456	3551	3456	0								6201	6201	0	6201	6254		3493	3493	3486	3493	0								6212	6212	0	6212	6244		3492	3492
						6225	6225	0	6225	6234		3457	3457	3550	3457	0								6206	6206	0	6206	6250		3494	3494	3485	3494	0								6213	6213	0	6213	6243		3493	3493
						6234	6234	0	6234	6225		3458	3458	3549	3458	0								6207	6207	0	6207	6249		3504	3504	3473	3504	0								6214	6214	0	6214	6242		3494	3494
						6235	6235	0	6235	6224		3459	3459	3548	3459	3473								6208	6208	0	6208	6248		3505	3505	3472	3505	0								6215	6215	0	6215	6241		3504	3504
						6237	6237	0	6237	6223		3460	3460	0	3460	3472								6209	6209	0	6209	6247		3506	3506	3471	3506	0								6220	6220	0	6220	6240		3505	3505
						6238	6238	0	6238	6222		3461	3461	3546	3461	0								6210	6210	0	6210	6246		3514	3514	3466	3514	0								6221	6221	0	6221	6239		3506	3506
						6239	6239	0	6239	6221		3462	3462	3518	3462	0								6212	6212	0	6212	6244		3516	3516	3464	3516	0								6222	6222	0	6222	6238		3514	3514
						6240	6240	0	6240	6220		3463	3463	3517	3463	0								6213	6213	0	6213	6243		3517	3517	3463	3517	0								6223	6223	0	6223	6237		3516	3516
						6241	6241	0	6241	6215		3464	3464	3516	3464	0								6214	6214	0	6214	6242		3518	3518	3462	3518	3527								6224	6224	0	6224	6235		3517	3517
						6242	6242	0	6242	6214		3466	3466	3514	3466	0								6215	6215	0	6215	6241		3519	3519	0	3519	3526								6225	6225	0	6225	6234		3518	3518
						6243	6243	0	6243	6213		3469	3469	3531	3469	0								6220	6220	0	6220	6240		3521	3521	3567	3521	0								6234	6234	0	6234	6225		3519	3519
						6244	6244	0	6244	6212		3470	3470	3530	3470	0								6221	6221	0	6221	6239		3522	3522	3566	3522	0								6235	6235	0	6235	6224		3521	3521
						6246	6246	0	6246	6210		3471	3471	3506	3471	0								6222	6222	0	6222	6238		3526	3526	3543	3526	3519								6237	6237	0	6237	6223		3522	3522
						6247	6247	0	6247	6209		3472	3472	3505	3472	3460								6223	6223	0	6223	6237		3527	3527	3542	3527	3518								6238	6238	0	6238	6222		3526	3526
						6248	6248	0	6248	6208		3473	3473	3504	3473	3459								6224	6224	0	6224	6235		3528	3528	3541	3528	0								6239	6239	0	6239	6221		3527	3527
						6249	6249	0	6249	6207		3475	3475	3553	3475	0								6225	6225	0	6225	6234		3529	3529	3540	3529	0								6240	6240	0	6240	6220		3528	3528
						6250	6250	0	6250	6206		3485	3485	3494	3485	0								6234	6234	0	6234	6225		3530	3530	3539	3530	0								6241	6241	0	6241	6215		3529	3529
						6254	6254	0	6254	6201		3486	3486	3493	3486	0								6235	6235	0	6235	6224		3531	3531	3538	3531	0								6242	6242	0	6242	6214		3530	3530
						6257	6257	0	6257	6198		3487	3487	3492	3487	0								6237	6237	0	6237	6223		3538	3538	3531	3538	0								6243	6243	0	6243	6213		3531	3531
						6258	6258	6197	6258	0		3492	3492	3487	3492	0								6238	6238	0	6238	6222		3539	3539	3530	3539	0								6244	6244	0	6244	6212		3538	3538
						6308	6308	0	6308	6332		3493	3493	3486	3493	0								6239	6239	0	6239	6221		3540	3540	3529	3540	0								6246	6246	0	6246	6210		3539	3539
						6309	6309	0	6309	6331		3494	3494	3485	3494	0								6240	6240	0	6240	6220		3541	3541	3528	3541	0								6247	6247	0	6247	6209		3540	3540
						6310	6310	0	6310	6330		3504	3504	3473	3504	0								6241	6241	0	6241	6215		3542	3542	3527	3542	0								6248	6248	0	6248	6208		3541	3541
						6311	6311	0	6311	6329		3505	3505	3472	3505	0								6242	6242	0	6242	6214		3543	3543	3526	3543	0								6249	6249	0	6249	6207		3542	3542
						6329	6329	0	6329	6311		3506	3506	3471	3506	0								6243	6243	0	6243	6213		3546	3546	3461	3546	0								6250	6250	0	6250	6206		3543	3543
						6330	6330	0	6330	6310		3514	3514	3466	3514	0								6244	6244	0	6244	6212		3548	3548	3459	3548	0								6258	6258	6197	6258	0		3546	3546
						6331	6331	0	6331	6309		3516	3516	3464	3516	0								6246	6246	0	6246	6210		3549	3549	3458	3549	0								6308	6308	0	6308	6332		3548	3548
						6332	6332	0	6332	6308		3517	3517	3463	3517	0								6247	6247	0	6247	6209		3550	3550	3457	3550	0								6309	6309	0	6309	6331		3549	3549
						6420	6420	0	6420	6486		3518	3518	3462	3518	3527								6248	6248	0	6248	6208		3551	3551	3456	3551	0								6310	6310	0	6310	6330		3550	3550
						6421	6421	0	6421	6485		3521	3521	3567	3521	0								6249	6249	0	6249	6207		3552	3552	3455	3552	0								6311	6311	0	6311	6329		3551	3551
						6422	6422	0	6422	6484		3527	3527	0	3527	3518								6250	6250	0	6250	6206		3553	3553	3475	3553	0								6329	6329	0	6329	6311		3552	3552
						6484	6484	0	6484	6422		3530	3530	3470	3530	0								6254	6254	0	6254	6201		3558	3558	3449	3558	0								6330	6330	0	6330	6310		3553	3553
						6485	6485	0	6485	6421		3531	3531	3469	3531	0								6257	6257	0	6257	6198		3559	3559	3448	3559	0								6331	6331	0	6331	6309		3558	3558
						6486	6486	0	6486	6420		3546	3546	3461	3546	0								6258	6258	6197	6258	0		3560	3560	3447	3560	0								6332	6332	0	6332	6308		3559	3559
						6521	6521	0	6521	6537		3548	3548	3459	3548	0								6308	6308	0	6308	6332		3566	3566	3522	3566	0								6420	6420	0	6420	6486		3560	3560
						6522	6522	0	6522	6536		3549	3549	3458	3549	0								6309	6309	0	6309	6331		3567	3567	3521	3567	0								6421	6421	0	6421	6485		3566	3566
						6523	6523	0	6523	6535		3550	3550	3457	3550	0								6310	6310	0	6310	6330		3571	3571	0	3571	3603								6422	6422	0	6422	6484		3567	3567
						6524	6524	0	6524	6534		3551	3551	3456	3551	0								6311	6311	0	6311	6329		3572	3572	0	3572	3602								6484	6484	0	6484	6422		3571	3571
						6534	6534	0	6534	6524		3552	3552	3455	3552	0								6329	6329	0	6329	6311		3573	3573	0	3573	3601								6485	6485	0	6485	6421		3572	3572
						6535	6535	0	6535	6523		3553	3553	3475	3553	0								6330	6330	0	6330	6310		3579	3579	0	3579	3597								6486	6486	0	6486	6420		3573	3573
						6536	6536	0	6536	6522		3558	3558	3449	3558	0								6331	6331	0	6331	6309		3580	3580	3652	3580	3590								6521	6521	0	6521	6537		3579	3579
						6537	6537	0	6537	6521		3559	3559	3448	3559	0								6332	6332	0	6332	6308		3581	3581	0	3581	3589								6522	6522	0	6522	6536		3580	3580
						6538	6538	0	6538	6595		3560	3560	3447	3560	0								6420	6420	0	6420	6486		3587	3587	3645	3587	3653								6523	6523	0	6523	6535		3581	3581
						6539	6539	0	6539	6594		3567	3567	3521	3567	0								6421	6421	0	6421	6485		3589	3589	0	3589	3581								6524	6524	0	6524	6534		3587	3587
						6540	6540	0	6540	6593		3571	3571	0	3571	3603								6422	6422	0	6422	6484		3590	3590	0	3590	3580								6534	6534	0	6534	6524		3589	3589
						6541	6541	0	6541	6592		3572	3572	0	3572	3602								6484	6484	0	6484	6422		3597	3597	0	3597	3579								6535	6535	0	6535	6523		3590	3590
						6543	6543	0	6543	6590		3579	3579	0	3579	3597								6485	6485	0	6485	6421		3601	3601	0	3601	3573								6536	6536	0	6536	6522		3597	3597
						6544	6544	0	6544	6589		3580	3580	3652	3580	3590								6486	6486	0	6486	6420		3602	3602	0	3602	3572								6537	6537	0	6537	6521		3601	3601
						6545	6545	0	6545	6588		3581	3581	0	3581	3589								6521	6521	0	6521	6537		3603	3603	0	3603	3571								6538	6538	0	6538	6595		3602	3602
						6546	6546	0	6546	6587		3587	3587	0	3587	3653								6522	6522	0	6522	6536		3613	3613	0	3613	3727								6539	6539	0	6539	6594		3603	3603
						6547	6547	0	6547	6585		3589	3589	0	3589	3581								6523	6523	0	6523	6535		3614	3614	0	3614	3726								6540	6540	0	6540	6593		3613	3613
						6548	6548	0	6548	6584		3590	3590	0	3590	3580								6524	6524	0	6524	6534		3618	3618	3722	3618	0								6541	6541	0	6541	6592		3614	3614
						6549	6549	0	6549	6583		3597	3597	0	3597	3579								6534	6534	0	6534	6524		3619	3619	3721	3619	0								6543	6543	0	6543	6590		3618	3618
						6550	6550	0	6550	6582		3602	3602	0	3602	3572								6535	6535	0	6535	6523		3624	3624	3716	3624	0								6544	6544	0	6544	6589		3619	3619
						6551	6551	0	6551	6581		3603	3603	0	3603	3571								6536	6536	0	6536	6522		3645	3645	3587	3645	0								6545	6545	0	6545	6588		3624	3624
						6552	6552	0	6552	6579		3618	3618	3722	3618	0								6537	6537	0	6537	6521		3648	3648	3695	3648	0								6546	6546	0	6546	6587		3645	3645
						6553	6553	0	6553	6578		3619	3619	3721	3619	0								6538	6538	0	6538	6595		3649	3649	3694	3649	0								6547	6547	0	6547	6585		3648	3648
						6554	6554	0	6554	6577		3624	3624	3716	3624	0								6539	6539	0	6539	6594		3652	3652	3580	3652	0								6548	6548	0	6548	6584		3649	3649
						6555	6555	0	6555	6576		3648	3648	3695	3648	0								6540	6540	0	6540	6593		3653	3653	0	3653	3587								6549	6549	0	6549	6583		3652	3652
						6556	6556	0	6556	6569		3649	3649	3694	3649	0								6541	6541	0	6541	6592		3686	3686	0	3686	3696								6550	6550	0	6550	6582		3653	3653
						6557	6557	0	6557	6568		3652	3652	3580	3652	0								6543	6543	0	6543	6590		3687	3687	0	3687	3695								6551	6551	0	6551	6581		3686	3686
						6558	6558	0	6558	6567		3653	3653	0	3653	3587								6544	6544	0	6544	6589		3688	3688	0	3688	3694								6552	6552	0	6552	6579		3687	3687
						6567	6567	0	6567	6558		3686	3686	0	3686	3696								6545	6545	0	6545	6588		3694	3694	3649	3694	3688								6553	6553	0	6553	6578		3688	3688
						6568	6568	0	6568	6557		3687	3687	0	3687	3695								6546	6546	0	6546	6587		3695	3695	3648	3695	3687								6554	6554	0	6554	6577		3694	3694
						6569	6569	0	6569	6556		3688	3688	0	3688	3694								6547	6547	0	6547	6585		3696	3696	0	3696	3686								6555	6555	0	6555	6576		3695	3695
						6576	6576	0	6576	6555		3694	3694	3649	3694	3688								6548	6548	0	6548	6584		3704	3704	0	3704	3759								6556	6556	0	6556	6569		3696	3696
						6577	6577	0	6577	6554		3695	3695	3648	3695	3687								6549	6549	0	6549	6583		3705	3705	0	3705	3758								6557	6557	0	6557	6568		3704	3704
						6578	6578	0	6578	6553		3696	3696	0	3696	3686								6550	6550	0	6550	6582		3706	3706	0	3706	3757								6558	6558	0	6558	6567		3705	3705
						6579	6579	0	6579	6552		3704	3704	0	3704	3759								6551	6551	0	6551	6581		3707	3707	0	3707	3756								6567	6567	0	6567	6558		3706	3706
						6581	6581	0	6581	6551		3705	3705	0	3705	3758								6552	6552	0	6552	6579		3708	3708	0	3708	3755								6568	6568	0	6568	6557		3707	3707
						6582	6582	0	6582	6550		3706	3706	0	3706	3757								6553	6553	0	6553	6578		3709	3709	0	3709	3754								6569	6569	0	6569	6556		3708	3708
						6583	6583	0	6583	6549		3707	3707	0	3707	3756								6554	6554	0	6554	6577		3710	3710	0	3710	3753								6576	6576	0	6576	6555		3709	3709
						6584	6584	0	6584	6548		3708	3708	0	3708	3755								6555	6555	0	6555	6576		3712	3712	0	3712	3722								6577	6577	0	6577	6554		3710	3710
						6585	6585	0	6585	6547		3709	3709	0	3709	3754								6556	6556	0	6556	6569		3713	3713	0	3713	3721								6578	6578	0	6578	6553		3712	3712
						6587	6587	0	6587	6546		3710	3710	0	3710	3753								6557	6557	0	6557	6568		3716	3716	3624	3716	0								6579	6579	0	6579	6552		3713	3713
						6588	6588	0	6588	6545		3712	3712	0	3712	3722								6558	6558	0	6558	6567		3721	3721	3619	3721	3713								6581	6581	0	6581	6551		3716	3716
						6589	6589	0	6589	6544		3713	3713	0	3713	3721								6567	6567	0	6567	6558		3722	3722	3618	3722	3712								6582	6582	0	6582	6550		3721	3721
						6590	6590	0	6590	6543		3716	3716	3624	3716	0								6568	6568	0	6568	6557		3726	3726	0	3726	3614								6583	6583	0	6583	6549		3722	3722
						6592	6592	0	6592	6541		3721	3721	3619	3721	3713								6569	6569	0	6569	6556		3727	3727	0	3727	3613								6584	6584	0	6584	6548		3726	3726
						6593	6593	0	6593	6540		3722	3722	3618	3722	3712								6576	6576	0	6576	6555		3730	3730	0	3730	3752								6585	6585	0	6585	6547		3727	3727
						6594	6594	0	6594	6539		3730	3730	0	3730	3752								6577	6577	0	6577	6554		3731	3731	0	3731	3751								6587	6587	0	6587	6546		3730	3730
						6595	6595	0	6595	6538		3731	3731	0	3731	3751								6578	6578	0	6578	6553		3732	3732	0	3732	3750								6588	6588	0	6588	6545		3731	3731
						6862	6862	6974	6862	0		3732	3732	0	3732	3750								6579	6579	0	6579	6552		3734	3734	0	3734	3748								6589	6589	0	6589	6544		3732	3732
						6974	6974	6862	6974	0		3734	3734	0	3734	3748								6581	6581	0	6581	6551		3735	3735	0	3735	3747								6590	6590	0	6590	6543		3734	3734
						7069	7069	0	7069	7175		3735	3735	0	3735	3747								6582	6582	0	6582	6550		3736	3736	0	3736	3746								6592	6592	0	6592	6541		3735	3735
						7070	7070	0	7070	7174		3736	3736	0	3736	3746								6583	6583	0	6583	6549		3738	3738	0	3738	3744								6593	6593	0	6593	6540		3736	3736
						7071	7071	0	7071	7173		3738	3738	0	3738	3744								6584	6584	0	6584	6548		3744	3744	0	3744	3738								6594	6594	0	6594	6539		3738	3738
						7072	7072	0	7072	7172		3744	3744	0	3744	3738								6585	6585	0	6585	6547		3746	3746	0	3746	3736								6595	6595	0	6595	6538		3744	3744
						7073	7073	0	7073	7171		3746	3746	0	3746	3736								6587	6587	0	6587	6546		3747	3747	0	3747	3735								6862	6862	6974	6862	0		3746	3746
						7171	7171	0	7171	7073		3747	3747	0	3747	3735								6588	6588	0	6588	6545		3748	3748	0	3748	3734								6863	6863	6973	6863	0		3747	3747
						7172	7172	0	7172	7072		3748	3748	0	3748	3734								6589	6589	0	6589	6544		3750	3750	0	3750	3732								6973	6973	6863	6973	0		3748	3748
						7173	7173	0	7173	7071		3750	3750	0	3750	3732								6590	6590	0	6590	6543		3751	3751	0	3751	3731								6974	6974	6862	6974	0		3750	3750
						7174	7174	0	7174	7070		3751	3751	0	3751	3731								6592	6592	0	6592	6541		3752	3752	0	3752	3730								7069	7069	0	7069	7175		3751	3751
						7175	7175	0	7175	7069		3752	3752	0	3752	3730								6593	6593	0	6593	6540		3753	3753	0	3753	3710								7070	7070	0	7070	7174		3752	3752
						7290	7290	0	7290	7328		3753	3753	0	3753	3710								6594	6594	0	6594	6539		3754	3754	0	3754	3709								7071	7071	0	7071	7173		3753	3753
						7291	7291	0	7291	7327		3754	3754	0	3754	3709								6595	6595	0	6595	6538		3755	3755	0	3755	3708								7072	7072	0	7072	7172		3754	3754
						7292	7292	0	7292	7326		3755	3755	0	3755	3708								6862	6862	6974	6862	0		3756	3756	0	3756	3707								7073	7073	0	7073	7171		3755	3755
						7293	7293	0	7293	7325		3756	3756	0	3756	3707								6863	6863	6973	6863	0		3757	3757	0	3757	3706								7171	7171	0	7171	7073		3756	3756
						7294	7294	0	7294	7324		3757	3757	0	3757	3706								6973	6973	6863	6973	0		3758	3758	0	3758	3705								7172	7172	0	7172	7072		3757	3757
						7295	7295	0	7295	7323		3758	3758	0	3758	3705								6974	6974	6862	6974	0		3759	3759	0	3759	3704								7173	7173	0	7173	7071		3758	3758
						7299	7299	0	7299	7319		3759	3759	0	3759	3704								7069	7069	0	7069	7175		3778	3778	0	3778	3786								7174	7174	0	7174	7070		3759	3759
						7300	7300	0	7300	7318		3778	3778	0	3778	3786								7070	7070	0	7070	7174		3779	3779	0	3779	3785								7175	7175	0	7175	7069		3778	3778
						7301	7301	0	7301	7317		3779	3779	0	3779	3785								7071	7071	0	7071	7173		3785	3785	0	3785	3779								7290	7290	0	7290	7328		3779	3779
						7302	7302	0	7302	7316		3785	3785	0	3785	3779								7072	7072	0	7072	7172		3786	3786	0	3786	3778								7291	7291	0	7291	7327		3785	3785
						7303	7303	0	7303	7315		3786	3786	0	3786	3778								7073	7073	0	7073	7171		3901	3901	3928	3901	0								7292	7292	0	7292	7326		3786	3786
						7304	7304	0	7304	7314		3901	3901	3928	3901	0								7171	7171	0	7171	7073		3915	3915	0	3915	3922								7293	7293	0	7293	7325		3901	3901
						7305	7305	0	7305	7313		3915	3915	0	3915	3922								7172	7172	0	7172	7072		3916	3916	0	3916	3921								7294	7294	0	7294	7324		3915	3915
						7306	7306	0	7306	7312		3916	3916	0	3916	3921								7173	7173	0	7173	7071		3921	3921	0	3921	3916								7295	7295	0	7295	7323		3916	3916
						7312	7312	0	7312	7306		3921	3921	0	3921	3916								7174	7174	0	7174	7070		3922	3922	0	3922	3915								7299	7299	0	7299	7319		3921	3921
						7313	7313	0	7313	7305		3922	3922	0	3922	3915								7175	7175	0	7175	7069		3928	3928	3901	3928	0								7300	7300	0	7300	7318		3922	3922
						7314	7314	0	7314	7304		3928	3928	3901	3928	0								7290	7290	0	7290	7328		3934	3934	3967	3934	0								7301	7301	0	7301	7317		3928	3928
						7315	7315	0	7315	7303		3934	3934	3967	3934	0								7291	7291	0	7291	7327		3936	3936	3964	3936	0								7302	7302	0	7302	7316		3934	3934
						7316	7316	0	7316	7302		3936	3936	3964	3936	0								7292	7292	0	7292	7326		3937	3937	3963	3937	0								7303	7303	0	7303	7315		3936	3936
						7317	7317	0	7317	7301		3937	3937	3963	3937	0								7293	7293	0	7293	7325		3940	3940	3961	3940	0								7304	7304	0	7304	7314		3937	3937
						7318	7318	0	7318	7300		3940	3940	3961	3940	0								7294	7294	0	7294	7324		3941	3941	3960	3941	0								7305	7305	0	7305	7313		3940	3940
						7319	7319	0	7319	7299		3941	3941	3960	3941	0								7295	7295	0	7295	7323		3954	3954	4040	3954	0								7306	7306	0	7306	7312		3941	3941
						7323	7323	0	7323	7295		3954	3954	4040	3954	0								7299	7299	0	7299	7319		3960	3960	3941	3960	0								7312	7312	0	7312	7306		3954	3954
						7324	7324	0	7324	7294		3960	3960	3941	3960	0								7300	7300	0	7300	7318		3961	3961	3940	3961	0								7313	7313	0	7313	7305		3960	3960
						7325	7325	0	7325	7293		3961	3961	3940	3961	0								7301	7301	0	7301	7317		3963	3963	3937	3963	0								7314	7314	0	7314	7304		3961	3961
						7326	7326	0	7326	7292		3963	3963	3937	3963	0								7302	7302	0	7302	7316		3964	3964	3936	3964	0								7315	7315	0	7315	7303		3963	3963
						7327	7327	0	7327	7291		3964	3964	3936	3964	0								7303	7303	0	7303	7315		3967	3967	3934	3967	0								7316	7316	0	7316	7302		3964	3964
						7328	7328	0	7328	7290		3967	3967	3934	3967	0								7304	7304	0	7304	7314		3976	3976	4017	3976	0								7317	7317	0	7317	7301		3967	3967
						7507	7507	0	7507	7531		3976	3976	4017	3976	0								7305	7305	0	7305	7313		3977	3977	4016	3977	0								7318	7318	0	7318	7300		3976	3976
						7508	7508	0	7508	7530		3977	3977	4016	3977	0								7306	7306	0	7306	7312		3991	3991	0	3991	4000								7319	7319	0	7319	7299		3977	3977
						7514	7514	0	7514	7528		3991	3991	0	3991	4000								7312	7312	0	7312	7306		4000	4000	0	4000	3991								7323	7323	0	7323	7295		3991	3991
						7515	7515	0	7515	7527		4000	4000	0	4000	3991								7313	7313	0	7313	7305		4004	4004	4058	4004	0								7324	7324	0	7324	7294		4000	4000
						7516	7516	0	7516	7526		4004	4004	4058	4004	0								7314	7314	0	7314	7304		4005	4005	4057	4005	0								7325	7325	0	7325	7293		4004	4004
						7518	7518	0	7518	7525		4005	4005	4057	4005	0								7315	7315	0	7315	7303		4016	4016	3977	4016	0								7326	7326	0	7326	7292		4005	4005
						7519	7519	0	7519	7524		4016	4016	3977	4016	0								7316	7316	0	7316	7302		4017	4017	3976	4017	0								7327	7327	0	7327	7291		4016	4016
						7524	7524	0	7524	7519		4017	4017	3976	4017	0								7317	7317	0	7317	7301		4040	4040	3954	4040	0								7328	7328	0	7328	7290		4017	4017
						7525	7525	0	7525	7518		4040	4040	3954	4040	0								7318	7318	0	7318	7300		4051	4051	4166	4051	0								7507	7507	0	7507	7531		4040	4040
						7526	7526	0	7526	7516		4051	4051	4166	4051	0								7319	7319	0	7319	7299		4052	4052	4165	4052	0								7508	7508	0	7508	7530		4051	4051
						7527	7527	0	7527	7515		4052	4052	4165	4052	0								7323	7323	0	7323	7295		4053	4053	4164	4053	0								7514	7514	0	7514	7528		4052	4052
						7528	7528	0	7528	7514		4053	4053	4164	4053	0								7324	7324	0	7324	7294		4054	4054	4163	4054	0								7515	7515	0	7515	7527		4053	4053
						7530	7530	0	7530	7508		4054	4054	4163	4054	0								7325	7325	0	7325	7293		4055	4055	4162	4055	0								7516	7516	0	7516	7526		4054	4054
						7531	7531	0	7531	7507		4055	4055	4162	4055	0								7326	7326	0	7326	7292		4056	4056	4161	4056	0								7518	7518	0	7518	7525		4055	4055
						7799	7799	0	7799	7865		4056	4056	4161	4056	0								7327	7327	0	7327	7291		4057	4057	4005	4057	0								7519	7519	0	7519	7524		4056	4056
						7800	7800	0	7800	7864		4057	4057	4005	4057	0								7328	7328	0	7328	7290		4058	4058	4004	4058	0								7524	7524	0	7524	7519		4057	4057
						7801	7801	0	7801	7863		4058	4058	4004	4058	0								7507	7507	0	7507	7531		4068	4068	4098	4068	0								7525	7525	0	7525	7518		4058	4058
						7802	7802	0	7802	7862		4068	4068	4098	4068	0								7508	7508	0	7508	7530		4069	4069	4097	4069	0								7526	7526	0	7526	7516		4068	4068
						7803	7803	0	7803	7861		4069	4069	4097	4069	0								7514	7514	0	7514	7528		4070	4070	4096	4070	0								7527	7527	0	7527	7515		4069	4069
						7804	7804	0	7804	7860		4070	4070	4096	4070	0								7515	7515	0	7515	7527		4096	4096	4070	4096	0								7528	7528	0	7528	7514		4070	4070
						7806	7806	0	7806	7856		4096	4096	4070	4096	0								7516	7516	0	7516	7526		4097	4097	4069	4097	0								7530	7530	0	7530	7508		4096	4096
						7807	7807	0	7807	7855		4097	4097	4069	4097	0								7518	7518	0	7518	7525		4098	4098	4068	4098	0								7531	7531	0	7531	7507		4097	4097
						7808	7808	0	7808	7854		4098	4098	4068	4098	0								7519	7519	0	7519	7524		4099	4099	4158	4099	0								7799	7799	0	7799	7865		4098	4098
						7809	7809	0	7809	7853		4099	4099	4158	4099	0								7524	7524	0	7524	7519		4100	4100	4157	4100	0								7800	7800	0	7800	7864		4099	4099
						7810	7810	0	7810	7852		4100	4100	4157	4100	0								7525	7525	0	7525	7518		4101	4101	4156	4101	0								7801	7801	0	7801	7863		4100	4100
						7811	7811	0	7811	7851		4101	4101	4156	4101	0								7526	7526	0	7526	7516		4111	4111	0	4111	4147								7802	7802	0	7802	7862		4101	4101
						7812	7812	0	7812	7850		4111	4111	0	4111	4147								7527	7527	0	7527	7515		4112	4112	0	4112	4146								7803	7803	0	7803	7861		4111	4111
						7813	7813	0	7813	7849		4112	4112	0	4112	4146								7528	7528	0	7528	7514		4113	4113	0	4113	4145								7804	7804	0	7804	7860		4112	4112
						7814	7814	0	7814	7848		4113	4113	0	4113	4145								7530	7530	0	7530	7508		4114	4114	0	4114	4144								7806	7806	0	7806	7856		4113	4113
						7815	7815	0	7815	7847		4114	4114	0	4114	4144								7531	7531	0	7531	7507		4144	4144	0	4144	4114								7807	7807	0	7807	7855		4114	4114
						7817	7817	0	7817	7845		4115	4115	0	4115	4143								7799	7799	0	7799	7865		4145	4145	0	4145	4113								7808	7808	0	7808	7854		4115	4115
						7818	7818	0	7818	7844		4143	4143	0	4143	4115								7800	7800	0	7800	7864		4146	4146	0	4146	4112								7809	7809	0	7809	7853		4143	4143
						7819	7819	0	7819	7843		4144	4144	0	4144	4114								7801	7801	0	7801	7863		4147	4147	0	4147	4111								7810	7810	0	7810	7852		4144	4144
						7823	7823	0	7823	7839		4145	4145	0	4145	4113								7802	7802	0	7802	7862		4156	4156	4101	4156	4173								7811	7811	0	7811	7851		4145	4145
						7824	7824	0	7824	7838		4146	4146	0	4146	4112								7803	7803	0	7803	7861		4157	4157	4100	4157	0								7812	7812	0	7812	7850		4146	4146
						7826	7826	0	7826	7836		4147	4147	0	4147	4111								7804	7804	0	7804	7860		4158	4158	4099	4158	4171								7813	7813	0	7813	7849		4147	4147
						7827	7827	0	7827	7835		4156	4156	4101	4156	4173								7806	7806	0	7806	7856		4159	4159	0	4159	4170								7814	7814	0	7814	7848		4156	4156
						7828	7828	0	7828	7834		4157	4157	4100	4157	0								7807	7807	0	7807	7855		4160	4160	0	4160	4169								7815	7815	0	7815	7847		4157	4157
						7829	7829	0	7829	7833		4158	4158	4099	4158	4171								7808	7808	0	7808	7854		4161	4161	4056	4161	4168								7817	7817	0	7817	7845		4158	4158
						7833	7833	0	7833	7829		4159	4159	0	4159	4170								7809	7809	0	7809	7853		4162	4162	4055	4162	4167								7818	7818	0	7818	7844		4159	4159
						7834	7834	0	7834	7828		4160	4160	0	4160	4169								7810	7810	0	7810	7852		4163	4163	4054	4163	0								7819	7819	0	7819	7843		4160	4160
						7835	7835	0	7835	7827		4161	4161	4056	4161	4168								7811	7811	0	7811	7851		4164	4164	4053	4164	0								7823	7823	0	7823	7839		4161	4161
						7836	7836	0	7836	7826		4162	4162	4055	4162	4167								7812	7812	0	7812	7850		4165	4165	4052	4165	0								7824	7824	0	7824	7838		4162	4162
						7838	7838	0	7838	7824		4163	4163	4054	4163	0								7813	7813	0	7813	7849		4166	4166	4051	4166	0								7826	7826	0	7826	7836		4163	4163
						7839	7839	0	7839	7823		4164	4164	4053	4164	0								7814	7814	0	7814	7848		4167	4167	0	4167	4162								7827	7827	0	7827	7835		4164	4164
						7843	7843	0	7843	7819		4165	4165	4052	4165	0								7815	7815	0	7815	7847		4168	4168	0	4168	4161								7828	7828	0	7828	7834		4165	4165
						7844	7844	0	7844	7818		4166	4166	4051	4166	0								7817	7817	0	7817	7845		4169	4169	0	4169	4160								7829	7829	0	7829	7833		4166	4166
						7845	7845	0	7845	7817		4167	4167	0	4167	4162								7818	7818	0	7818	7844		4170	4170	0	4170	4159								7833	7833	0	7833	7829		4167	4167
						7847	7847	0	7847	7815		4168	4168	0	4168	4161								7819	7819	0	7819	7843		4171	4171	0	4171	4158								7834	7834	0	7834	7828		4168	4168
						7848	7848	0	7848	7814		4169	4169	0	4169	4160								7823	7823	0	7823	7839		4173	4173	0	4173	4156								7835	7835	0	7835	7827		4169	4169
						7849	7849	0	7849	7813		4170	4170	0	4170	4159								7824	7824	0	7824	7838		4174	4174	0	4174	4211								7836	7836	0	7836	7826		4170	4170
						7850	7850	0	7850	7812		4171	4171	0	4171	4158								7826	7826	0	7826	7836		4175	4175	0	4175	4210								7838	7838	0	7838	7824		4171	4171
						7851	7851	0	7851	7811		4173	4173	0	4173	4156								7827	7827	0	7827	7835		4176	4176	0	4176	4209								7839	7839	0	7839	7823		4173	4173
						7852	7852	0	7852	7810		4174	4174	0	4174	4211								7828	7828	0	7828	7834		4177	4177	0	4177	4208								7843	7843	0	7843	7819		4174	4174
						7853	7853	0	7853	7809		4175	4175	0	4175	4210								7829	7829	0	7829	7833		4178	4178	0	4178	4207								7844	7844	0	7844	7818		4175	4175
						7854	7854	0	7854	7808		4176	4176	0	4176	4209								7833	7833	0	7833	7829		4179	4179	0	4179	4206								7845	7845	0	7845	7817		4176	4176
						7855	7855	0	7855	7807		4177	4177	0	4177	4208								7834	7834	0	7834	7828		4186	4186	0	4186	4200								7847	7847	0	7847	7815		4177	4177
						7856	7856	0	7856	7806		4178	4178	0	4178	4207								7835	7835	0	7835	7827		4187	4187	0	4187	4199								7848	7848	0	7848	7814		4178	4178
						7860	7860	0	7860	7804		4179	4179	0	4179	4206								7836	7836	0	7836	7826		4188	4188	0	4188	4198								7849	7849	0	7849	7813		4179	4179
						7861	7861	0	7861	7803		4186	4186	0	4186	4200								7838	7838	0	7838	7824		4189	4189	0	4189	4197								7850	7850	0	7850	7812		4186	4186
						7862	7862	0	7862	7802		4187	4187	0	4187	4199								7839	7839	0	7839	7823		4190	4190	0	4190	4196								7851	7851	0	7851	7811		4187	4187
						7863	7863	0	7863	7801		4188	4188	0	4188	4198								7843	7843	0	7843	7819		4193	4193	4211	4193	0								7852	7852	0	7852	7810		4188	4188
						7864	7864	0	7864	7800		4189	4189	0	4189	4197								7844	7844	0	7844	7818		4196	4196	0	4196	4190								7853	7853	0	7853	7809		4189	4189
						7865	7865	0	7865	7799		4190	4190	0	4190	4196								7845	7845	0	7845	7817		4197	4197	0	4197	4189								7854	7854	0	7854	7808		4190	4190
						8455	8455	0	8455	8505		4193	4193	4211	4193	0								7847	7847	0	7847	7815		4198	4198	0	4198	4188								7855	7855	0	7855	7807		4193	4193
						8456	8456	0	8456	8504		4196	4196	0	4196	4190								7848	7848	0	7848	7814		4199	4199	0	4199	4187								7856	7856	0	7856	7806		4196	4196
						8457	8457	0	8457	8503		4197	4197	0	4197	4189								7849	7849	0	7849	7813		4200	4200	0	4200	4186								7860	7860	0	7860	7804		4197	4197
						8461	8461	0	8461	8498		4198	4198	0	4198	4188								7850	7850	0	7850	7812		4206	4206	0	4206	4179								7861	7861	0	7861	7803		4198	4198
						8462	8462	0	8462	8497		4199	4199	0	4199	4187								7851	7851	0	7851	7811		4207	4207	0	4207	4178								7862	7862	0	7862	7802		4199	4199
						8463	8463	0	8463	8496		4200	4200	0	4200	4186								7852	7852	0	7852	7810		4208	4208	0	4208	4177								7863	7863	0	7863	7801		4200	4200
						8464	8464	0	8464	8495		4206	4206	0	4206	4179								7853	7853	0	7853	7809		4209	4209	0	4209	4176								7864	7864	0	7864	7800		4206	4206
						8465	8465	0	8465	8494		4207	4207	0	4207	4178								7854	7854	0	7854	7808		4210	4210	0	4210	4175								7865	7865	0	7865	7799		4207	4207
						8466	8466	0	8466	8493		4208	4208	0	4208	4177								7855	7855	0	7855	7807		4211	4211	4193	4211	4174								8455	8455	0	8455	8505		4208	4208
						8467	8467	0	8467	8492		4209	4209	0	4209	4176								7856	7856	0	7856	7806		4216	4216	0	4216	4238								8456	8456	0	8456	8504		4209	4209
						8468	8468	0	8468	8491		4210	4210	0	4210	4175								7860	7860	0	7860	7804		4217	4217	0	4217	4237								8457	8457	0	8457	8503		4210	4210
						8469	8469	0	8469	8490		4211	4211	4193	4211	4174								7861	7861	0	7861	7803		4218	4218	0	4218	4236								8461	8461	0	8461	8498		4211	4211
						8470	8470	0	8470	8489		4216	4216	0	4216	4238								7862	7862	0	7862	7802		4220	4220	0	4220	4234								8462	8462	0	8462	8497		4216	4216
						8471	8471	0	8471	8488		4217	4217	0	4217	4237								7863	7863	0	7863	7801		4221	4221	0	4221	4233								8463	8463	0	8463	8496		4217	4217
						8488	8488	0	8488	8471		4218	4218	0	4218	4236								7864	7864	0	7864	7800		4222	4222	0	4222	4232								8464	8464	0	8464	8495		4218	4218
						8489	8489	0	8489	8470		4220	4220	0	4220	4234								7865	7865	0	7865	7799		4232	4232	0	4232	4222								8465	8465	0	8465	8494		4220	4220
						8490	8490	0	8490	8469		4221	4221	0	4221	4233								8455	8455	0	8455	8505		4233	4233	0	4233	4221								8466	8466	0	8466	8493		4221	4221
						8491	8491	0	8491	8468		4233	4233	0	4233	4221								8456	8456	0	8456	8504		4234	4234	0	4234	4220								8467	8467	0	8467	8492		4222	4222
						8492	8492	0	8492	8467		4234	4234	0	4234	4220								8457	8457	0	8457	8503		4236	4236	4319	4236	4218								8468	8468	0	8468	8491		4232	4232
						8493	8493	0	8493	8466		4236	4236	4319	4236	4218								8461	8461	0	8461	8498		4237	4237	0	4237	4217								8469	8469	0	8469	8490		4233	4233
						8494	8494	0	8494	8465		4237	4237	0	4237	4217								8462	8462	0	8462	8497		4238	4238	0	4238	4216								8470	8470	0	8470	8489		4234	4234
						8495	8495	0	8495	8464		4238	4238	0	4238	4216								8463	8463	0	8463	8496		4239	4239	0	4239	4316								8471	8471	0	8471	8488		4236	4236
						8496	8496	0	8496	8463		4239	4239	0	4239	4316								8464	8464	0	8464	8495		4240	4240	0	4240	4315								8488	8488	0	8488	8471		4237	4237
						8497	8497	0	8497	8462		4240	4240	0	4240	4315								8465	8465	0	8465	8494		4241	4241	0	4241	4314								8489	8489	0	8489	8470		4238	4238
						8498	8498	0	8498	8461		4241	4241	0	4241	4314								8466	8466	0	8466	8493		4281	4281	4379	4281	0								8490	8490	0	8490	8469		4239	4239
						8503	8503	0	8503	8457		4281	4281	4379	4281	0								8467	8467	0	8467	8492		4282	4282	4378	4282	0								8491	8491	0	8491	8468		4240	4240
						8504	8504	0	8504	8456		4283	4283	4377	4283	0								8468	8468	0	8468	8491		4283	4283	4377	4283	0								8492	8492	0	8492	8467		4241	4241
						8505	8505	0	8505	8455		4298	4298	0	4298	4362								8469	8469	0	8469	8490		4298	4298	0	4298	4362								8493	8493	0	8493	8466		4281	4281
						8525	8525	0	8525	8549		4299	4299	0	4299	4361								8470	8470	0	8470	8489		4299	4299	0	4299	4361								8494	8494	0	8494	8465		4282	4282
						8526	8526	0	8526	8548		4310	4310	4362	4310	4360								8471	8471	0	8471	8488		4310	4310	4362	4310	4360								8495	8495	0	8495	8464		4283	4283
						8527	8527	0	8527	8547		4311	4311	4361	4311	4359								8488	8488	0	8488	8471		4311	4311	4361	4311	4359								8496	8496	0	8496	8463		4298	4298
						8528	8528	0	8528	8546		4312	4312	4360	4312	0								8489	8489	0	8489	8470		4312	4312	4360	4312	0								8497	8497	0	8497	8462		4299	4299
						8546	8546	0	8546	8528		4313	4313	4357	4313	0								8490	8490	0	8490	8469		4313	4313	4357	4313	0								8498	8498	0	8498	8461		4310	4310
						8547	8547	0	8547	8527		4314	4314	4356	4314	4241								8491	8491	0	8491	8468		4314	4314	4356	4314	4241								8503	8503	0	8503	8457		4311	4311
						8548	8548	0	8548	8526		4315	4315	4355	4315	4240								8492	8492	0	8492	8467		4315	4315	4355	4315	4240								8504	8504	0	8504	8456		4312	4312
						8549	8549	0	8549	8525		4316	4316	4354	4316	4239								8493	8493	0	8493	8466		4316	4316	4354	4316	4239								8505	8505	0	8505	8455		4313	4313
						8553	8553	0	8553	8581		4317	4317	4353	4317	0								8494	8494	0	8494	8465		4317	4317	4353	4317	0								8525	8525	0	8525	8549		4314	4314
						8555	8555	0	8555	8579		4318	4318	4352	4318	0								8495	8495	0	8495	8464		4318	4318	4352	4318	0								8526	8526	0	8526	8548		4315	4315
						8556	8556	0	8556	8578		4319	4319	4236	4319	0								8496	8496	0	8496	8463		4319	4319	4236	4319	0								8527	8527	0	8527	8547		4316	4316
						8557	8557	0	8557	8577		4320	4320	4368	4320	0								8497	8497	0	8497	8462		4320	4320	4368	4320	0								8528	8528	0	8528	8546		4317	4317
						8558	8558	0	8558	8576		4321	4321	4351	4321	4344								8498	8498	0	8498	8461		4321	4321	4351	4321	4344								8546	8546	0	8546	8528		4318	4318
						8559	8559	0	8559	8574		4322	4322	4350	4322	4343								8503	8503	0	8503	8457		4322	4322	4350	4322	4343								8547	8547	0	8547	8527		4319	4319
						8560	8560	0	8560	8573		4324	4324	4349	4324	4341								8504	8504	0	8504	8456		4324	4324	4349	4324	4341								8548	8548	0	8548	8526		4320	4320
						8561	8561	0	8561	8572		4325	4325	4348	4325	0								8505	8505	0	8505	8455		4325	4325	4348	4325	0								8549	8549	0	8549	8525		4321	4321
						8562	8562	0	8562	8571		4326	4326	4347	4326	0								8525	8525	0	8525	8549		4326	4326	4347	4326	0								8553	8553	0	8553	8581		4322	4322
						8571	8571	0	8571	8562		4327	4327	4346	4327	4338								8526	8526	0	8526	8548		4327	4327	4346	4327	4338								8555	8555	0	8555	8579		4324	4324
						8572	8572	0	8572	8561		4328	4328	4345	4328	4337								8527	8527	0	8527	8547		4328	4328	4345	4328	4337								8556	8556	0	8556	8578		4325	4325
						8573	8573	0	8573	8560		4329	4329	4344	4329	4336								8528	8528	0	8528	8546		4329	4329	4344	4329	4336								8557	8557	0	8557	8577		4326	4326
						8574	8574	0	8574	8559		4330	4330	4343	4330	4335								8546	8546	0	8546	8528		4330	4330	4343	4330	4335								8558	8558	0	8558	8576		4327	4327
						8576	8576	0	8576	8558		4335	4335	0	4335	4330								8547	8547	0	8547	8527		4335	4335	0	4335	4330								8559	8559	0	8559	8574		4328	4328
						8577	8577	0	8577	8557		4336	4336	0	4336	4329								8548	8548	0	8548	8526		4336	4336	0	4336	4329								8560	8560	0	8560	8573		4329	4329
						8578	8578	0	8578	8556		4337	4337	0	4337	4328								8549	8549	0	8549	8525		4337	4337	0	4337	4328								8561	8561	0	8561	8572		4330	4330
						8579	8579	0	8579	8555		4338	4338	0	4338	4327								8553	8553	0	8553	8581		4338	4338	0	4338	4327								8562	8562	0	8562	8571		4335	4335
						8581	8581	0	8581	8553		4341	4341	0	4341	4324								8555	8555	0	8555	8579		4341	4341	0	4341	4324								8571	8571	0	8571	8562		4336	4336
						8596	8596	0	8596	8616		4343	4343	4330	4343	4322								8556	8556	0	8556	8578		4343	4343	4330	4343	4322								8572	8572	0	8572	8561		4337	4337
						8597	8597	0	8597	8615		4344	4344	4329	4344	4321								8557	8557	0	8557	8577		4344	4344	4329	4344	4321								8573	8573	0	8573	8560		4338	4338
						8599	8599	0	8599	8614		4345	4345	4328	4345	0								8558	8558	0	8558	8576		4345	4345	4328	4345	0								8574	8574	0	8574	8559		4341	4341
						8600	8600	0	8600	8613		4346	4346	4327	4346	0								8559	8559	0	8559	8574		4346	4346	4327	4346	0								8576	8576	0	8576	8558		4343	4343
						8601	8601	0	8601	8612		4347	4347	4326	4347	0								8560	8560	0	8560	8573		4347	4347	4326	4347	0								8577	8577	0	8577	8557		4344	4344
						8602	8602	0	8602	8611		4348	4348	4325	4348	0								8561	8561	0	8561	8572		4348	4348	4325	4348	0								8578	8578	0	8578	8556		4345	4345
						8603	8603	0	8603	8610		4349	4349	4324	4349	4400								8562	8562	0	8562	8571		4349	4349	4324	4349	4400								8579	8579	0	8579	8555		4346	4346
						8604	8604	0	8604	8609		4350	4350	4322	4350	0								8571	8571	0	8571	8562		4350	4350	4322	4350	0								8581	8581	0	8581	8553		4347	4347
						8609	8609	0	8609	8604		4351	4351	4321	4351	0								8572	8572	0	8572	8561		4351	4351	4321	4351	0								8596	8596	0	8596	8616		4348	4348
						8610	8610	0	8610	8603		4352	4352	4318	4352	0								8573	8573	0	8573	8560		4352	4352	4318	4352	0								8597	8597	0	8597	8615		4349	4349
						8611	8611	0	8611	8602		4353	4353	4317	4353	0								8574	8574	0	8574	8559		4353	4353	4317	4353	0								8599	8599	0	8599	8614		4350	4350
						8612	8612	0	8612	8601		4354	4354	4316	4354	0								8576	8576	0	8576	8558		4354	4354	4316	4354	0								8600	8600	0	8600	8613		4351	4351
						8613	8613	0	8613	8600		4355	4355	4315	4355	0								8577	8577	0	8577	8557		4355	4355	4315	4355	0								8601	8601	0	8601	8612		4352	4352
						8614	8614	0	8614	8599		4356	4356	4314	4356	4386								8578	8578	0	8578	8556		4356	4356	4314	4356	4386								8602	8602	0	8602	8611		4353	4353
						8615	8615	0	8615	8597		4357	4357	4313	4357	0								8579	8579	0	8579	8555		4357	4357	4313	4357	0								8603	8603	0	8603	8610		4354	4354
						8616	8616	0	8616	8596		4359	4359	0	4359	4311								8581	8581	0	8581	8553		4359	4359	0	4359	4311								8604	8604	0	8604	8609		4355	4355
						8617	8617	0	8617	8642		4360	4360	4312	4360	4310								8596	8596	0	8596	8616		4360	4360	4312	4360	4310								8609	8609	0	8609	8604		4356	4356
						8618	8618	0	8618	8641		4361	4361	4311	4361	4299								8597	8597	0	8597	8615		4361	4361	4311	4361	4299								8610	8610	0	8610	8603		4357	4357
						8619	8619	0	8619	8640		4362	4362	4310	4362	4298								8599	8599	0	8599	8614		4362	4362	4310	4362	4298								8611	8611	0	8611	8602		4359	4359
						8620	8620	0	8620	8639		4368	4368	4320	4368	0								8600	8600	0	8600	8613		4368	4368	4320	4368	0								8612	8612	0	8612	8601		4360	4360
						8622	8622	0	8622	8637		4377	4377	4283	4377	0								8601	8601	0	8601	8612		4377	4377	4283	4377	0								8613	8613	0	8613	8600		4361	4361
						8623	8623	0	8623	8636		4379	4379	4281	4379	0								8602	8602	0	8602	8611		4378	4378	4282	4378	0								8614	8614	0	8614	8599		4362	4362
						8624	8624	0	8624	8635		4386	4386	0	4386	4356								8603	8603	0	8603	8610		4379	4379	4281	4379	0								8615	8615	0	8615	8597		4368	4368
						8625	8625	0	8625	8634		4388	4388	4491	4388	0								8604	8604	0	8604	8609		4386	4386	0	4386	4356								8616	8616	0	8616	8596		4377	4377
						8634	8634	0	8634	8625		4389	4389	4490	4389	0								8609	8609	0	8609	8604		4388	4388	4491	4388	0								8617	8617	0	8617	8642		4378	4378
						8635	8635	0	8635	8624		4400	4400	0	4400	4349								8610	8610	0	8610	8603		4389	4389	4490	4389	0								8618	8618	0	8618	8641		4379	4379
						8636	8636	0	8636	8623		4436	4436	4541	4436	0								8611	8611	0	8611	8602		4400	4400	0	4400	4349								8619	8619	0	8619	8640		4386	4386
						8637	8637	0	8637	8622		4440	4440	4537	4440	0								8612	8612	0	8612	8601		4436	4436	4541	4436	0								8620	8620	0	8620	8639		4388	4388
						8639	8639	0	8639	8620		4441	4441	4536	4441	0								8613	8613	0	8613	8600		4450	4450	4526	4450	0								8622	8622	0	8622	8637		4389	4389
						8640	8640	0	8640	8619		4442	4442	4535	4442	0								8614	8614	0	8614	8599		4451	4451	4525	4451	0								8623	8623	0	8623	8636		4400	4400
						8641	8641	0	8641	8618		4444	4444	4533	4444	0								8615	8615	0	8615	8597		4453	4453	4523	4453	0								8624	8624	0	8624	8635		4436	4436
						8642	8642	0	8642	8617		4445	4445	4532	4445	0								8616	8616	0	8616	8596		4456	4456	4520	4456	0								8625	8625	0	8625	8634		4442	4442
						8652	8652	0	8652	8662		4450	4450	4526	4450	0								8617	8617	0	8617	8642		4457	4457	4478	4457	0								8634	8634	0	8634	8625		4450	4450
						8653	8653	0	8653	8661		4451	4451	4525	4451	0								8618	8618	0	8618	8641		4464	4464	0	4464	4491								8635	8635	0	8635	8624		4451	4451
						8654	8654	0	8654	8660		4452	4452	4524	4452	0								8619	8619	0	8619	8640		4465	4465	0	4465	4490								8636	8636	0	8636	8623		4452	4452
						8660	8660	0	8660	8654		4453	4453	4523	4453	0								8620	8620	0	8620	8639		4471	4471	0	4471	4486								8637	8637	0	8637	8622		4453	4453
						8661	8661	0	8661	8653		4456	4456	4520	4456	0								8622	8622	0	8622	8637		4478	4478	4457	4478	0								8639	8639	0	8639	8620		4456	4456
						8662	8662	0	8662	8652		4457	4457	4478	4457	0								8623	8623	0	8623	8636		4486	4486	0	4486	4471								8640	8640	0	8640	8619		4457	4457
						8669	8669	0	8669	8679		4464	4464	0	4464	4491								8624	8624	0	8624	8635		4490	4490	4389	4490	4465								8641	8641	0	8641	8618		4464	4464
						8670	8670	0	8670	8678		4465	4465	0	4465	4490								8625	8625	0	8625	8634		4491	4491	4388	4491	4464								8642	8642	0	8642	8617		4465	4465
						8671	8671	0	8671	8677		4471	4471	0	4471	4486								8634	8634	0	8634	8625		4498	4498	4509	4498	0								8652	8652	0	8652	8662		4471	4471
						8677	8677	0	8677	8671		4478	4478	4457	4478	0								8635	8635	0	8635	8624		4509	4509	4498	4509	0								8653	8653	0	8653	8661		4478	4478
						8678	8678	0	8678	8670		4486	4486	0	4486	4471								8636	8636	0	8636	8623		4520	4520	4456	4520	4529								8654	8654	0	8654	8660		4486	4486
						8679	8679	0	8679	8669		4490	4490	4389	4490	4465								8637	8637	0	8637	8622		4521	4521	0	4521	4528								8660	8660	0	8660	8654		4490	4490
						8687	8687	8692	8687	0		4491	4491	4388	4491	4464								8639	8639	0	8639	8620		4522	4522	0	4522	4527								8661	8661	0	8661	8653		4491	4491
						8692	8692	8687	8692	0		4498	4498	4509	4498	0								8640	8640	0	8640	8619		4523	4523	4453	4523	0								8662	8662	0	8662	8652		4498	4498
						8799	8799	0	8799	8808		4509	4509	4498	4509	0								8641	8641	0	8641	8618		4525	4525	4451	4525	0								8669	8669	0	8669	8679		4509	4509
						8800	8800	0	8800	8807		4520	4520	4456	4520	4529								8642	8642	0	8642	8617		4526	4526	4450	4526	0								8670	8670	0	8670	8678		4520	4520
						8807	8807	0	8807	8800		4521	4521	0	4521	4528								8652	8652	0	8652	8662		4527	4527	0	4527	4522								8671	8671	0	8671	8677		4521	4521
						8808	8808	0	8808	8799		4522	4522	0	4522	4527								8653	8653	0	8653	8661		4528	4528	0	4528	4521								8677	8677	0	8677	8671		4522	4522
						8857	8857	0	8857	8973		4523	4523	4453	4523	0								8654	8654	0	8654	8660		4529	4529	0	4529	4520								8678	8678	0	8678	8670		4523	4523
						8858	8858	0	8858	8972		4524	4524	4452	4524	0								8660	8660	0	8660	8654		4541	4541	4436	4541	0								8679	8679	0	8679	8669		4524	4524
						8860	8860	0	8860	8970		4525	4525	4451	4525	0								8661	8661	0	8661	8653		5011	5011	0	5011	5021								8687	8687	8692	8687	0		4525	4525
						8970	8970	0	8970	8860		4526	4526	4450	4526	0								8662	8662	0	8662	8652		5021	5021	0	5021	5011								8692	8692	8687	8692	0		4526	4526
						8972	8972	0	8972	8858		4527	4527	0	4527	4522								8669	8669	0	8669	8679		5066	5066	5144	5066	0								8799	8799	0	8799	8808		4527	4527
						8973	8973	0	8973	8857		4528	4528	0	4528	4521								8670	8670	0	8670	8678		5067	5067	5143	5067	0								8800	8800	0	8800	8807		4528	4528
						9145	9145	0	9145	9165		4529	4529	0	4529	4520								8671	8671	0	8671	8677		5070	5070	5140	5070	0								8807	8807	0	8807	8800		4529	4529
						9165	9165	0	9165	9145		4532	4532	4445	4532	0								8677	8677	0	8677	8671		5071	5071	5139	5071	0								8808	8808	0	8808	8799		4535	4535
												4533	4533	4444	4533	0								8678	8678	0	8678	8670		5139	5139	5071	5139	0								8857	8857	0	8857	8973		4541	4541
												4535	4535	4442	4535	0								8679	8679	0	8679	8669		5140	5140	5070	5140	0								8858	8858	0	8858	8972		5011	5011
												4536	4536	4441	4536	0								8687	8687	8692	8687	0		5143	5143	5067	5143	0								8860	8860	0	8860	8970		5021	5021
												4537	4537	4440	4537	0								8692	8692	8687	8692	0		5144	5144	5066	5144	0								8970	8970	0	8970	8860		5066	5066
												4541	4541	4436	4541	0								8799	8799	0	8799	8808		5146	5146	0	5146	5216								8972	8972	0	8972	8858		5067	5067
												5011	5011	0	5011	5021								8800	8800	0	8800	8807		5147	5147	0	5147	5215								8973	8973	0	8973	8857		5070	5070
												5021	5021	0	5021	5011								8807	8807	0	8807	8800		5159	5159	0	5159	5196								9145	9145	0	9145	9165		5071	5071
												5066	5066	5144	5066	0								8808	8808	0	8808	8799		5160	5160	0	5160	5195								9165	9165	0	9165	9145		5139	5139
												5067	5067	5143	5067	0								8857	8857	0	8857	8973		5161	5161	0	5161	5194														5140	5140
												5070	5070	5140	5070	0								8858	8858	0	8858	8972		5194	5194	0	5194	5161														5143	5143
												5071	5071	5139	5071	0								8860	8860	0	8860	8970		5195	5195	0	5195	5160														5144	5144
												5139	5139	5071	5139	0								8970	8970	0	8970	8860		5196	5196	0	5196	5159														5146	5146
												5140	5140	5070	5140	0								8972	8972	0	8972	8858		5215	5215	0	5215	5147														5147	5147
												5143	5143	5067	5143	0								8973	8973	0	8973	8857		5216	5216	0	5216	5146														5159	5159
												5144	5144	5066	5144	0								9145	9145	0	9145	9165		5281	5281	5289	5281	0														5160	5160
												5146	5146	0	5146	5216								9165	9165	0	9165	9145		5289	5289	5281	5289	0														5161	5161
												5147	5147	0	5147	5215														5304	5304	5387	5304	0														5194	5194
												5159	5159	0	5159	5196														5305	5305	5386	5305	0														5195	5195
												5160	5160	0	5160	5195														5306	5306	5385	5306	0														5196	5196
												5161	5161	0	5161	5194														5307	5307	5384	5307	0														5215	5215
												5194	5194	0	5194	5161														5313	5313	5380	5313	0														5216	5216
												5195	5195	0	5195	5160														5380	5380	5313	5380	0														5281	5281
												5196	5196	0	5196	5159														5384	5384	5307	5384	5438														5289	5289
												5215	5215	0	5215	5147														5385	5385	5306	5385	5437														5304	5304
												5216	5216	0	5216	5146														5386	5386	5305	5386	5436														5305	5305
												5281	5281	5289	5281	0														5387	5387	5304	5387	5435														5306	5306
												5289	5289	5281	5289	0														5388	5388	0	5388	5434														5307	5307
												5304	5304	5387	5304	0														5395	5395	5424	5395	5428														5313	5313
												5305	5305	5386	5305	0														5397	5397	5422	5397	5426														5380	5380
												5306	5306	5385	5306	0														5398	5398	0	5398	5425														5384	5384
												5307	5307	5384	5307	0														5422	5422	5397	5422	0														5385	5385
												5313	5313	5380	5313	0														5424	5424	5395	5424	0														5386	5386
												5380	5380	5313	5380	0														5425	5425	0	5425	5398														5387	5387
												5384	5384	5307	5384	5438														5426	5426	0	5426	5397														5388	5388
												5385	5385	5306	5385	5437														5428	5428	0	5428	5395														5395	5395
												5386	5386	5305	5386	5436														5434	5434	0	5434	5388														5397	5397
												5387	5387	5304	5387	5435														5435	5435	0	5435	5387														5398	5398
												5388	5388	0	5388	5434														5436	5436	0	5436	5386														5422	5422
												5434	5434	0	5434	5388														5437	5437	0	5437	5385														5424	5424
												5435	5435	0	5435	5387														5438	5438	0	5438	5384														5425	5425
												5436	5436	0	5436	5386														5477	5477	5518	5477	0														5426	5426
												5437	5437	0	5437	5385														5482	5482	0	5482	5497														5428	5428
												5438	5438	0	5438	5384														5483	5483	0	5483	5496														5434	5434
												5482	5482	0	5482	5497														5484	5484	0	5484	5495														5435	5435
												5483	5483	0	5483	5496														5485	5485	0	5485	5494														5436	5436
												5484	5484	0	5484	5495														5486	5486	0	5486	5493														5437	5437
												5485	5485	0	5485	5494														5487	5487	0	5487	5492														5438	5438
												5486	5486	0	5486	5493														5490	5490	5603	5490	0														5477	5477
												5487	5487	0	5487	5492														5492	5492	0	5492	5487														5482	5482
												5490	5490	5603	5490	0														5493	5493	0	5493	5486														5483	5483
												5492	5492	0	5492	5487														5494	5494	0	5494	5485														5484	5484
												5493	5493	0	5493	5486														5495	5495	0	5495	5484														5485	5485
												5494	5494	0	5494	5485														5496	5496	0	5496	5483														5486	5486
												5495	5495	0	5495	5484														5497	5497	0	5497	5482														5487	5487
												5496	5496	0	5496	5483														5499	5499	5507	5499	5519														5490	5490
												5497	5497	0	5497	5482														5500	5500	5506	5500	5518														5492	5492
												5499	5499	0	5499	5519														5501	5501	5505	5501	5517														5493	5493
												5500	5500	0	5500	5518														5503	5503	0	5503	5515														5494	5494
												5501	5501	0	5501	5517														5504	5504	0	5504	5514														5495	5495
												5503	5503	0	5503	5515														5505	5505	5501	5505	5513														5496	5496
												5504	5504	0	5504	5514														5506	5506	5500	5506	5512														5497	5497
												5505	5505	0	5505	5513														5507	5507	5499	5507	0														5499	5499
												5506	5506	0	5506	5512														5509	5509	5534	5509	0														5500	5500
												5509	5509	5534	5509	0														5512	5512	0	5512	5506														5501	5501
												5512	5512	0	5512	5506														5513	5513	0	5513	5505														5503	5503
												5513	5513	0	5513	5505														5514	5514	0	5514	5504														5504	5504
												5514	5514	0	5514	5504														5515	5515	5629	5515	5503														5505	5505
												5515	5515	5629	5515	5503														5517	5517	0	5517	5501														5506	5506
												5517	5517	0	5517	5501														5518	5518	5477	5518	5500														5507	5507
												5518	5518	0	5518	5500														5519	5519	0	5519	5499														5509	5509
												5519	5519	0	5519	5499														5534	5534	5509	5534	0														5512	5512
												5534	5534	5509	5534	0														5536	5536	5549	5536	0														5513	5513
												5536	5536	5549	5536	0														5537	5537	5548	5537	0														5514	5514
												5537	5537	5548	5537	0														5538	5538	5547	5538	0														5515	5515
												5538	5538	5547	5538	0														5547	5547	5538	5547	0														5517	5517
												5547	5547	5538	5547	0														5548	5548	5537	5548	0														5518	5518
												5548	5548	5537	5548	0														5549	5549	5536	5549	0														5519	5519
												5549	5549	5536	5549	0														5553	5553	5669	5553	0														5534	5534
												5553	5553	5669	5553	0														5565	5565	5570	5565	0														5536	5536
												5565	5565	5570	5565	0														5567	5567	5594	5567	0														5537	5537
												5567	5567	5594	5567	0														5570	5570	5565	5570	0														5538	5538
												5570	5570	5565	5570	0														5582	5582	0	5582	5693														5547	5547
												5579	5579	5696	5579	0														5594	5594	5567	5594	0														5548	5548
												5582	5582	0	5582	5693														5603	5603	5490	5603	0														5549	5549
												5594	5594	5567	5594	0														5608	5608	5648	5608	0														5553	5553
												5603	5603	5490	5603	0														5613	5613	5696	5613	0														5565	5565
												5608	5608	5648	5608	0														5615	5615	5645	5615	0														5567	5567
												5615	5615	5645	5615	0														5621	5621	0	5621	5638														5570	5570
												5621	5621	0	5621	5638														5627	5627	5666	5627	0														5582	5582
												5623	5623	5636	5623	0														5629	5629	5515	5629	0														5594	5594
												5627	5627	5666	5627	0														5638	5638	0	5638	5621														5603	5603
												5629	5629	5515	5629	0														5645	5645	5615	5645	0														5608	5608
												5636	5636	5623	5636	0														5648	5648	5608	5648	0														5615	5615
												5638	5638	0	5638	5621														5666	5666	5627	5666	0														5621	5621
												5645	5645	5615	5645	0														5669	5669	5553	5669	0														5627	5627
												5648	5648	5608	5648	0														5670	5670	5741	5670	0														5629	5629
												5666	5666	5627	5666	0														5671	5671	5740	5671	0														5638	5638
												5669	5669	5553	5669	0														5676	5676	5735	5676	0														5645	5645
												5670	5670	5741	5670	0														5677	5677	5734	5677	0														5648	5648
												5671	5671	5740	5671	0														5685	5685	5732	5685	0														5666	5666
												5674	5674	0	5674	5737														5693	5693	0	5693	5582														5669	5669
												5680	5680	0	5680	5729														5696	5696	5613	5696	0														5670	5670
												5683	5683	5755	5683	5726														5732	5732	5685	5732	0														5671	5671
												5684	5684	5754	5684	5725														5734	5734	5677	5734	0														5676	5676
												5685	5685	5732	5685	0														5735	5735	5676	5735	0														5677	5677
												5693	5693	0	5693	5582														5740	5740	5671	5740	0														5685	5685
												5696	5696	5579	5696	0														5741	5741	5670	5741	0														5693	5693
												5725	5725	0	5725	5684														5753	5753	5853	5753	0														5732	5732
												5726	5726	0	5726	5683														5762	5762	5857	5762	0														5734	5734
												5729	5729	0	5729	5680														5765	5765	0	5765	5841														5735	5735
												5732	5732	5685	5732	0														5766	5766	0	5766	5840														5740	5740
												5737	5737	0	5737	5674														5767	5767	0	5767	5839														5741	5741
												5740	5740	5671	5740	0														5768	5768	0	5768	5838														5753	5753
												5741	5741	5670	5741	0														5769	5769	0	5769	5837														5762	5762
												5753	5753	5853	5753	0														5772	5772	5846	5772	0														5765	5765
												5754	5754	5684	5754	0														5774	5774	0	5774	5834														5766	5766
												5755	5755	5683	5755	0														5776	5776	0	5776	5832														5767	5767
												5762	5762	5865	5762	0														5777	5777	0	5777	5831														5768	5768
												5765	5765	0	5765	5841														5778	5778	0	5778	5830														5769	5769
												5766	5766	0	5766	5840														5779	5779	0	5779	5829														5772	5772
												5772	5772	5846	5772	0														5780	5780	0	5780	5828														5774	5774
												5774	5774	0	5774	5834														5781	5781	0	5781	5827														5776	5776
												5776	5776	0	5776	5832														5785	5785	5792	5785	0														5777	5777
												5777	5777	0	5777	5831														5787	5787	5861	5787	0														5778	5778
												5778	5778	0	5778	5830														5788	5788	5860	5788	0														5779	5779
												5779	5779	0	5779	5829														5791	5791	0	5791	5810														5780	5780
												5780	5780	0	5780	5828														5792	5792	5785	5792	5809														5781	5781
												5781	5781	0	5781	5827														5793	5793	0	5793	5808														5785	5785
												5785	5785	5792	5785	0														5794	5794	0	5794	5807														5787	5787
												5787	5787	5861	5787	0														5795	5795	0	5795	5806														5788	5788
												5788	5788	5860	5788	0														5797	5797	0	5797	5804														5791	5791
												5791	5791	0	5791	5810														5798	5798	0	5798	5803														5792	5792
												5792	5792	5785	5792	5809														5803	5803	0	5803	5798														5793	5793
												5793	5793	0	5793	5808														5804	5804	0	5804	5797														5794	5794
												5794	5794	0	5794	5807														5806	5806	0	5806	5795														5795	5795
												5795	5795	0	5795	5806														5807	5807	0	5807	5794														5797	5797
												5797	5797	0	5797	5804														5808	5808	0	5808	5793														5798	5798
												5798	5798	0	5798	5803														5809	5809	0	5809	5792														5803	5803
												5803	5803	0	5803	5798														5810	5810	0	5810	5791														5804	5804
												5804	5804	0	5804	5797														5814	5814	0	5814	5825														5806	5806
												5806	5806	0	5806	5795														5815	5815	0	5815	5824														5807	5807
												5807	5807	0	5807	5794														5816	5816	0	5816	5823														5808	5808
												5808	5808	0	5808	5793														5817	5817	0	5817	5822														5809	5809
												5809	5809	0	5809	5792														5822	5822	0	5822	5817														5810	5810
												5810	5810	0	5810	5791														5823	5823	0	5823	5816														5814	5814
												5814	5814	0	5814	5825														5824	5824	0	5824	5815														5815	5815
												5815	5815	0	5815	5824														5825	5825	0	5825	5814														5816	5816
												5816	5816	0	5816	5823														5827	5827	0	5827	5781														5817	5817
												5817	5817	0	5817	5822														5828	5828	0	5828	5780														5822	5822
												5822	5822	0	5822	5817														5829	5829	0	5829	5779														5823	5823
												5823	5823	0	5823	5816														5830	5830	0	5830	5778														5824	5824
												5824	5824	0	5824	5815														5831	5831	0	5831	5777														5825	5825
												5825	5825	0	5825	5814														5832	5832	0	5832	5776														5827	5827
												5827	5827	0	5827	5781														5834	5834	0	5834	5774														5828	5828
												5828	5828	0	5828	5780														5837	5837	5845	5837	5769														5829	5829
												5829	5829	0	5829	5779														5838	5838	0	5838	5768														5830	5830
												5830	5830	0	5830	5778														5839	5839	0	5839	5767														5831	5831
												5831	5831	0	5831	5777														5840	5840	0	5840	5766														5832	5832
												5832	5832	0	5832	5776														5841	5841	0	5841	5765														5834	5834
												5834	5834	0	5834	5774														5845	5845	5837	5845	0														5837	5837
												5840	5840	0	5840	5766														5846	5846	5772	5846	0														5838	5838
												5841	5841	0	5841	5765														5853	5853	5753	5853	0														5839	5839
												5846	5846	5772	5846	0														5857	5857	5762	5857	0														5840	5840
												5853	5853	5753	5853	0														5860	5860	5788	5860	0														5841	5841
												5860	5860	5788	5860	0														5861	5861	5787	5861	0														5845	5845
												5861	5861	5787	5861	0														5889	5889	6001	5889	0														5846	5846
												5865	5865	5762	5865	0														5904	5904	0	5904	5913														5853	5853
												5889	5889	6001	5889	0														5905	5905	0	5905	5912														5857	5857
												5904	5904	0	5904	5913														5911	5911	6026	5911	0														5860	5860
												5905	5905	0	5905	5912														5912	5912	6025	5912	5905														5861	5861
												5911	5911	6026	5911	0														5913	5913	6024	5913	5904														5889	5889
												5912	5912	6025	5912	5905														5914	5914	6023	5914	0														5911	5911
												5913	5913	6024	5913	5904														5916	5916	0	5916	5929														5914	5914
												5914	5914	6023	5914	0														5917	5917	6020	5917	5928														5916	5916
												5916	5916	0	5916	5929														5918	5918	6019	5918	5927														5917	5917
												5917	5917	6020	5917	5928														5919	5919	6018	5919	0														5918	5918
												5918	5918	6019	5918	5927														5920	5920	6016	5920	0														5919	5919
												5919	5919	6018	5919	0														5921	5921	6015	5921	0														5920	5920
												5920	5920	6016	5920	0														5923	5923	6014	5923	0														5921	5921
												5921	5921	6015	5921	0														5926	5926	5955	5926	0														5923	5923
												5923	5923	6014	5923	0														5927	5927	5954	5927	5918														5926	5926
												5926	5926	5955	5926	0														5928	5928	0	5928	5917														5927	5927
												5927	5927	5954	5927	5918														5929	5929	0	5929	5916														5928	5928
												5928	5928	0	5928	5917														5954	5954	5927	5954	0														5929	5929
												5929	5929	6008	5929	5916														5955	5955	5926	5955	0														5954	5954
												5954	5954	5927	5954	0														5964	5964	5987	5964	0														5955	5955
												5955	5955	5926	5955	0														5974	5974	5984	5974	0														5964	5964
												5964	5964	5987	5964	0														5975	5975	5983	5975	0														5974	5974
												5974	5974	5984	5974	0														5983	5983	5975	5983	0														5975	5975
												5975	5975	5983	5975	0														5984	5984	5974	5984	0														5983	5983
												5983	5983	5975	5983	0														5987	5987	5964	5987	0														5984	5984
												5984	5984	5974	5984	0														5994	5994	0	5994	6033														5987	5987
												5987	5987	5964	5987	0														5995	5995	0	5995	6032														5994	5994
												5994	5994	0	5994	6033														5996	5996	0	5996	6031														5995	5995
												5995	5995	0	5995	6032														5997	5997	0	5997	6030														5996	5996
												5996	5996	0	5996	6031														6001	6001	5889	6001	0														5997	5997
												5997	5997	0	5997	6030														6002	6002	0	6002	6025														6001	6001
												6001	6001	5889	6001	0														6003	6003	0	6003	6024														6002	6002
												6002	6002	0	6002	6025														6004	6004	0	6004	6023														6003	6003
												6003	6003	0	6003	6024														6005	6005	0	6005	6022														6004	6004
												6004	6004	0	6004	6023														6008	6008	0	6008	6019														6005	6005
												6005	6005	0	6005	6022														6009	6009	0	6009	6017														6008	6008
												6008	6008	5929	6008	6019														6010	6010	0	6010	6016														6009	6009
												6009	6009	0	6009	6017														6014	6014	5923	6014	0														6010	6010
												6010	6010	0	6010	6016														6015	6015	5921	6015	0														6014	6014
												6014	6014	5923	6014	0														6016	6016	5920	6016	6010														6015	6015
												6015	6015	5921	6015	0														6017	6017	0	6017	6009														6016	6016
												6016	6016	5920	6016	6010														6018	6018	5919	6018	0														6017	6017
												6017	6017	0	6017	6009														6019	6019	5918	6019	6008														6018	6018
												6018	6018	5919	6018	0														6020	6020	5917	6020	0														6019	6019
												6019	6019	5918	6019	6008														6021	6021	6087	6021	0														6020	6020
												6020	6020	5917	6020	0														6022	6022	6086	6022	6005														6021	6021
												6021	6021	6087	6021	0														6023	6023	5914	6023	6004														6022	6022
												6022	6022	6086	6022	6005														6024	6024	5913	6024	6003														6023	6023
												6023	6023	5914	6023	6004														6025	6025	5912	6025	6002														6024	6024
												6024	6024	5913	6024	6003														6026	6026	5911	6026	0														6025	6025
												6025	6025	5912	6025	6002														6030	6030	0	6030	5997														6026	6026
												6026	6026	5911	6026	0														6031	6031	0	6031	5996														6030	6030
												6030	6030	0	6030	5997														6032	6032	0	6032	5995														6031	6031
												6031	6031	0	6031	5996														6033	6033	0	6033	5994														6032	6032
												6032	6032	0	6032	5995														6045	6045	6148	6045	0														6033	6033
												6033	6033	0	6033	5994														6046	6046	6147	6046	0														6046	6046
												6046	6046	6147	6046	0														6047	6047	6125	6047	0														6047	6047
												6047	6047	6125	6047	0														6048	6048	0	6048	6066														6048	6048
												6048	6048	0	6048	6066														6049	6049	0	6049	6065														6049	6049
												6049	6049	0	6049	6065														6050	6050	0	6050	6064														6050	6050
												6050	6050	0	6050	6064														6051	6051	0	6051	6063														6051	6051
												6051	6051	0	6051	6063														6052	6052	0	6052	6062														6052	6052
												6052	6052	0	6052	6062														6062	6062	0	6062	6052														6062	6062
												6062	6062	0	6062	6052														6063	6063	0	6063	6051														6063	6063
												6063	6063	0	6063	6051														6064	6064	0	6064	6050														6064	6064
												6064	6064	0	6064	6050														6065	6065	0	6065	6049														6065	6065
												6065	6065	0	6065	6049														6066	6066	0	6066	6048														6066	6066
												6066	6066	0	6066	6048														6079	6079	6110	6079	0														6079	6079
												6079	6079	6110	6079	0														6081	6081	6107	6081	0														6081	6081
												6081	6081	6107	6081	0														6082	6082	6106	6082	0														6082	6082
												6082	6082	6106	6082	0														6083	6083	6105	6083	6092														6083	6083
												6083	6083	6105	6083	6092														6086	6086	6022	6086	0														6086	6086
												6086	6086	6022	6086	0														6087	6087	6021	6087	0														6087	6087
												6087	6087	6021	6087	0														6089	6089	0	6089	6099														6089	6089
												6089	6089	0	6089	6099														6090	6090	0	6090	6098														6090	6090
												6090	6090	0	6090	6098														6091	6091	0	6091	6097														6091	6091
												6091	6091	0	6091	6097														6092	6092	6176	6092	6083														6092	6092
												6092	6092	6176	6092	6083														6093	6093	6175	6093	0														6093	6093
												6093	6093	6175	6093	0														6094	6094	6174	6094	0														6094	6094
												6094	6094	6174	6094	0														6097	6097	0	6097	6091														6097	6097
												6097	6097	0	6097	6091														6098	6098	0	6098	6090														6098	6098
												6098	6098	0	6098	6090														6099	6099	0	6099	6089														6099	6099
												6099	6099	0	6099	6089														6105	6105	6083	6105	0														6105	6105
												6105	6105	6083	6105	0														6106	6106	6082	6106	0														6106	6106
												6106	6106	6082	6106	0														6107	6107	6081	6107	0														6107	6107
												6107	6107	6081	6107	0														6110	6110	6079	6110	0														6110	6110
												6110	6110	6079	6110	0														6119	6119	6163	6119	0														6119	6119
												6119	6119	6163	6119	0														6125	6125	6047	6125	0														6125	6125
												6125	6125	6047	6125	0														6147	6147	6046	6147	0														6147	6147
												6147	6147	6046	6147	0														6148	6148	6045	6148	0														6163	6163
												6163	6163	6119	6163	0														6163	6163	6119	6163	0														6174	6174
												6174	6174	6094	6174	0														6174	6174	6094	6174	0														6175	6175
												6175	6175	6093	6175	0														6175	6175	6093	6175	0														6176	6176
												6176	6176	6092	6176	0														6176	6176	6092	6176	0														6197	6197
												6197	6197	6258	6197	0														6197	6197	6258	6197	0														6258	6258
												6198	6198	0	6198	6257														6198	6198	0	6198	6257														6347	6347
												6201	6201	0	6201	6254														6201	6201	0	6201	6254														6348	6348
												6254	6254	6304	6254	6201														6254	6254	6304	6254	6201														6350	6350
												6257	6257	6301	6257	6198														6257	6257	6301	6257	6198														6359	6359
												6258	6258	6197	6258	0														6258	6258	6197	6258	0														6361	6361
												6301	6301	6257	6301	0														6301	6301	6257	6301	0														6362	6362
												6304	6304	6254	6304	0														6304	6304	6254	6304	0														6385	6385
												6347	6347	6362	6347	0														6350	6350	6359	6350	0														6392	6392
												6348	6348	6361	6348	0														6359	6359	6350	6359	0														6404	6404
												6350	6350	6359	6350	0														6385	6385	6392	6385	0														6405	6405
												6359	6359	6350	6359	0														6392	6392	6385	6392	0														6406	6406
												6361	6361	6348	6361	0														6404	6404	6502	6404	0														6407	6407
												6362	6362	6347	6362	0														6405	6405	6501	6405	0														6408	6408
												6385	6385	6392	6385	0														6406	6406	6500	6406	0														6409	6409
												6392	6392	6385	6392	0														6407	6407	6499	6407	0														6410	6410
												6404	6404	6502	6404	0														6408	6408	6498	6408	0														6411	6411
												6405	6405	6501	6405	0														6409	6409	6495	6409	0														6412	6412
												6406	6406	6500	6406	0														6410	6410	6494	6410	0														6413	6413
												6407	6407	6499	6407	0														6411	6411	6493	6411	0														6414	6414
												6408	6408	6498	6408	0														6412	6412	6492	6412	0														6415	6415
												6409	6409	6495	6409	0														6413	6413	6491	6413	0														6416	6416
												6410	6410	6494	6410	0														6414	6414	6490	6414	0														6426	6426
												6411	6411	6493	6411	0														6415	6415	6489	6415	0														6471	6471
												6412	6412	6492	6412	0														6416	6416	6488	6416	0														6488	6488
												6413	6413	6491	6413	0														6426	6426	6471	6426	0														6489	6489
												6414	6414	6490	6414	0														6471	6471	6426	6471	0														6490	6490
												6415	6415	6489	6415	0														6488	6488	6416	6488	0														6491	6491
												6416	6416	6488	6416	0														6489	6489	6415	6489	0														6492	6492
												6426	6426	6471	6426	0														6490	6490	6414	6490	0														6493	6493
												6471	6471	6426	6471	0														6491	6491	6413	6491	0														6494	6494
												6488	6488	6416	6488	0														6492	6492	6412	6492	0														6495	6495
												6489	6489	6415	6489	0														6493	6493	6411	6493	0														6498	6498
												6490	6490	6414	6490	0														6494	6494	6410	6494	0														6499	6499
												6491	6491	6413	6491	0														6495	6495	6409	6495	0														6500	6500
												6492	6492	6412	6492	0														6498	6498	6408	6498	0														6501	6501
												6493	6493	6411	6493	0														6499	6499	6407	6499	0														6502	6502
												6494	6494	6410	6494	0														6500	6500	6406	6500	0														6521	6521
												6495	6495	6409	6495	0														6501	6501	6405	6501	0														6522	6522
												6498	6498	6408	6498	0														6502	6502	6404	6502	0														6523	6523
												6499	6499	6407	6499	0														6521	6521	0	6521	6537														6524	6524
												6500	6500	6406	6500	0														6522	6522	0	6522	6536														6534	6534
												6501	6501	6405	6501	0														6523	6523	0	6523	6535														6535	6535
												6502	6502	6404	6502	0														6524	6524	0	6524	6534														6536	6536
												6521	6521	0	6521	6537														6534	6534	0	6534	6524														6537	6537
												6522	6522	0	6522	6536														6535	6535	0	6535	6523														6597	6597
												6523	6523	0	6523	6535														6536	6536	0	6536	6522														6600	6600
												6524	6524	0	6524	6534														6537	6537	6597	6537	6521														6603	6603
												6534	6534	0	6534	6524														6597	6597	6537	6597	0														6615	6615
												6535	6535	0	6535	6523														6603	6603	6615	6603	0														6618	6618
												6536	6536	0	6536	6522														6615	6615	6603	6615	0														6656	6656
												6537	6537	6597	6537	6521														6656	6656	6774	6656	0														6702	6702
												6597	6597	6537	6597	0														6702	6702	6801	6702	0														6704	6704
												6600	6600	6618	6600	0														6704	6704	0	6704	6767														6706	6706
												6603	6603	6615	6603	0														6706	6706	6797	6706	0														6707	6707
												6604	6604	6614	6604	0														6707	6707	6796	6707	0														6710	6710
												6614	6614	6604	6614	0														6710	6710	6792	6710	0														6711	6711
												6615	6615	6603	6615	0														6711	6711	6757	6711	6791														6712	6712
												6618	6618	6600	6618	0														6712	6712	6756	6712	0														6713	6713
												6656	6656	6774	6656	0														6713	6713	6755	6713	0														6714	6714
												6702	6702	6801	6702	0														6714	6714	6754	6714	0														6715	6715
												6704	6704	0	6704	6767														6715	6715	6753	6715	0														6716	6716
												6706	6706	6797	6706	0														6716	6716	6752	6716	0														6717	6717
												6707	6707	6796	6707	0														6717	6717	6751	6717	0														6718	6718
												6710	6710	6792	6710	0														6718	6718	6750	6718	0														6719	6719
												6711	6711	6757	6711	6791														6719	6719	6749	6719	0														6737	6737
												6712	6712	6756	6712	0														6737	6737	0	6737	6757														6738	6738
												6713	6713	6755	6713	0														6738	6738	0	6738	6756														6749	6749
												6714	6714	6754	6714	0														6749	6749	6719	6749	6817														6750	6750
												6715	6715	6753	6715	0														6750	6750	6718	6750	6816														6751	6751
												6716	6716	6752	6716	0														6751	6751	6717	6751	6815														6752	6752
												6717	6717	6751	6717	0														6752	6752	6716	6752	6814														6753	6753
												6718	6718	6750	6718	0														6753	6753	6715	6753	6813														6754	6754
												6719	6719	6749	6719	0														6754	6754	6714	6754	0														6755	6755
												6737	6737	0	6737	6757														6755	6755	6713	6755	0														6756	6756
												6738	6738	0	6738	6756														6756	6756	6712	6756	6738														6757	6757
												6749	6749	6719	6749	6817														6757	6757	6711	6757	6737														6767	6767
												6750	6750	6718	6750	6816														6767	6767	0	6767	6704														6774	6774
												6751	6751	6717	6751	6815														6774	6774	6656	6774	0														6779	6779
												6752	6752	6716	6752	6814														6779	6779	6896	6779	0														6780	6780
												6753	6753	6715	6753	6813														6780	6780	6895	6780	0														6781	6781
												6754	6754	6714	6754	0														6781	6781	6894	6781	0														6782	6782
												6755	6755	6713	6755	0														6782	6782	6893	6782	0														6784	6784
												6756	6756	6712	6756	6738														6784	6784	6890	6784	0														6785	6785
												6757	6757	6711	6757	6737														6785	6785	6889	6785	0														6786	6786
												6767	6767	0	6767	6704														6786	6786	6888	6786	0														6787	6787
												6774	6774	6656	6774	0														6787	6787	6887	6787	0														6791	6791
												6779	6779	6896	6779	0														6791	6791	0	6791	6711														6792	6792
												6780	6780	6895	6780	0														6792	6792	6710	6792	0														6796	6796
												6781	6781	6894	6781	0														6796	6796	6707	6796	0														6797	6797
												6782	6782	6893	6782	0														6797	6797	6706	6797	0														6800	6800
												6784	6784	6890	6784	0														6800	6800	6915	6800	0														6801	6801
												6785	6785	6889	6785	0														6801	6801	6702	6801	0														6813	6813
												6786	6786	6888	6786	0														6813	6813	0	6813	6753														6814	6814
												6787	6787	6887	6787	0														6814	6814	0	6814	6752														6815	6815
												6791	6791	0	6791	6711														6815	6815	0	6815	6751														6816	6816
												6792	6792	6710	6792	0														6816	6816	0	6816	6750														6817	6817
												6796	6796	6707	6796	0														6817	6817	0	6817	6749														6830	6830
												6797	6797	6706	6797	0														6830	6830	6948	6830	0														6831	6831
												6800	6800	6915	6800	0														6831	6831	6947	6831	0														6832	6832
												6801	6801	6702	6801	0														6832	6832	6875	6832	0														6833	6833
												6813	6813	0	6813	6753														6833	6833	6874	6833	0														6834	6834
												6814	6814	0	6814	6752														6834	6834	6873	6834	0														6835	6835
												6815	6815	0	6815	6751														6835	6835	6872	6835	0														6836	6836
												6816	6816	0	6816	6750														6836	6836	6871	6836	0														6838	6838
												6817	6817	0	6817	6749														6838	6838	6939	6838	0														6839	6839
												6830	6830	6948	6830	0														6839	6839	6869	6839	0														6840	6840
												6831	6831	6947	6831	0														6840	6840	6868	6840	0														6841	6841
												6832	6832	6875	6832	0														6841	6841	6867	6841	0														6842	6842
												6833	6833	6874	6833	0														6842	6842	6935	6842	0														6843	6843
												6834	6834	6873	6834	0														6843	6843	6934	6843	0														6844	6844
												6835	6835	6872	6835	0														6844	6844	6933	6844	0														6845	6845
												6836	6836	6871	6836	0														6845	6845	6932	6845	0														6846	6846
												6838	6838	6939	6838	0														6846	6846	6931	6846	0														6847	6847
												6839	6839	6869	6839	0														6847	6847	6930	6847	0														6848	6848
												6840	6840	6868	6840	0														6848	6848	6929	6848	0														6853	6853
												6841	6841	6867	6841	0														6853	6853	0	6853	6858														6858	6858
												6842	6842	6935	6842	0														6858	6858	0	6858	6853														6862	6862
												6843	6843	6934	6843	0														6862	6862	6974	6862	0														6863	6863
												6844	6844	6933	6844	0														6863	6863	6973	6863	0														6864	6864
												6845	6845	6932	6845	0														6864	6864	6972	6864	0														6865	6865
												6846	6846	6931	6846	0														6865	6865	6971	6865	0														6866	6866
												6847	6847	6930	6847	0														6866	6866	6970	6866	0														6867	6867
												6848	6848	6929	6848	0														6867	6867	6841	6867	0														6868	6868
												6862	6862	6974	6862	0														6868	6868	6840	6868	6888														6869	6869
												6863	6863	6973	6863	0														6869	6869	6839	6869	6887														6870	6870
												6864	6864	6972	6864	0														6870	6870	0	6870	6886														6871	6871
												6865	6865	6971	6865	0														6871	6871	6836	6871	6885														6872	6872
												6866	6866	6970	6866	0														6872	6872	6835	6872	6884														6873	6873
												6867	6867	6841	6867	0														6873	6873	6834	6873	6883														6874	6874
												6868	6868	6840	6868	6888														6874	6874	6833	6874	6882														6875	6875
												6869	6869	6839	6869	6887														6875	6875	6832	6875	6881														6881	6881
												6870	6870	6905	6870	6886														6881	6881	0	6881	6875														6882	6882
												6871	6871	6836	6871	6885														6882	6882	0	6882	6874														6883	6883
												6872	6872	6835	6872	6884														6883	6883	0	6883	6873														6884	6884
												6873	6873	6834	6873	6883														6884	6884	0	6884	6872														6885	6885
												6874	6874	6833	6874	6882														6885	6885	0	6885	6871														6886	6886
												6875	6875	6832	6875	6881														6886	6886	0	6886	6870														6887	6887
												6881	6881	0	6881	6875														6887	6887	6787	6887	6869														6888	6888
												6882	6882	0	6882	6874														6888	6888	6786	6888	6868														6889	6889
												6883	6883	0	6883	6873														6889	6889	6785	6889	0														6890	6890
												6884	6884	0	6884	6872														6890	6890	6784	6890	0														6893	6893
												6885	6885	0	6885	6871														6891	6891	7000	6891	0														6894	6894
												6886	6886	0	6886	6870														6892	6892	6999	6892	0														6895	6895
												6887	6887	6787	6887	6869														6893	6893	6782	6893	6912														6896	6896
												6888	6888	6786	6888	6868														6894	6894	6781	6894	6911														6897	6897
												6889	6889	6785	6889	0														6895	6895	6780	6895	6910														6898	6898
												6890	6890	6784	6890	0														6896	6896	6779	6896	6909														6899	6899
												6893	6893	6782	6893	6912														6897	6897	0	6897	6908														6900	6900
												6894	6894	6781	6894	6911														6898	6898	0	6898	6907														6901	6901
												6895	6895	6780	6895	6910														6899	6899	0	6899	6906														6902	6902
												6896	6896	6779	6896	6909														6900	6900	6910	6900	6905														6903	6903
												6897	6897	0	6897	6908														6901	6901	6909	6901	0														6905	6905
												6898	6898	0	6898	6907														6902	6902	6908	6902	0														6906	6906
												6899	6899	0	6899	6906														6903	6903	6907	6903	0														6907	6907
												6900	6900	6910	6900	6905														6905	6905	0	6905	6900														6908	6908
												6901	6901	6909	6901	0														6906	6906	0	6906	6899														6909	6909
												6902	6902	6908	6902	0														6907	6907	6903	6907	6898														6910	6910
												6903	6903	6907	6903	0														6908	6908	6902	6908	6897														6911	6911
												6905	6905	6870	6905	6900														6909	6909	6901	6909	6896														6912	6912
												6906	6906	0	6906	6899														6910	6910	6900	6910	6895														6915	6915
												6907	6907	6903	6907	6898														6911	6911	0	6911	6894														6916	6916
												6908	6908	6902	6908	6897														6912	6912	0	6912	6893														6918	6918
												6909	6909	6901	6909	6896														6915	6915	6800	6915	0														6919	6919
												6910	6910	6900	6910	6895														6916	6916	7012	6916	0														6921	6921
												6911	6911	0	6911	6894														6918	6918	0	6918	6935														6922	6922
												6912	6912	0	6912	6893														6919	6919	0	6919	6934														6923	6923
												6915	6915	6800	6915	0														6921	6921	0	6921	6932														6924	6924
												6916	6916	7012	6916	0														6922	6922	0	6922	6931														6925	6925
												6918	6918	0	6918	6935														6923	6923	0	6923	6930														6926	6926
												6919	6919	0	6919	6934														6924	6924	0	6924	6929														6928	6928
												6921	6921	0	6921	6932														6925	6925	7038	6925	0														6929	6929
												6922	6922	0	6922	6931														6926	6926	7037	6926	0														6930	6930
												6923	6923	7040	6923	6930														6928	6928	7044	6928	0														6931	6931
												6924	6924	7039	6924	6929														6929	6929	6848	6929	6924														6932	6932
												6925	6925	7038	6925	0														6930	6930	6847	6930	6923														6933	6933
												6926	6926	7037	6926	0														6931	6931	6846	6931	6922														6934	6934
												6928	6928	7044	6928	0														6932	6932	6845	6932	6921														6935	6935
												6929	6929	6848	6929	6924														6933	6933	6844	6933	0														6937	6937
												6930	6930	6847	6930	6923														6934	6934	6843	6934	6919														6938	6938
												6931	6931	6846	6931	6922														6935	6935	6842	6935	6918														6939	6939
												6932	6932	6845	6932	6921														6937	6937	0	6937	6957														6940	6940
												6933	6933	6844	6933	0														6938	6938	0	6938	6956														6941	6941
												6934	6934	6843	6934	6919														6939	6939	6838	6939	6955														6942	6942
												6935	6935	6842	6935	6918														6940	6940	0	6940	6954														6947	6947
												6937	6937	0	6937	6957														6941	6941	0	6941	6953														6948	6948
												6938	6938	0	6938	6956														6942	6942	0	6942	6952														6952	6952
												6939	6939	6838	6939	6955														6947	6947	6831	6947	0														6953	6953
												6940	6940	0	6940	6954														6948	6948	6830	6948	0														6954	6954
												6941	6941	0	6941	6953														6952	6952	0	6952	6942														6955	6955
												6942	6942	0	6942	6952														6953	6953	0	6953	6941														6956	6956
												6947	6947	6831	6947	0														6954	6954	0	6954	6940														6957	6957
												6948	6948	6830	6948	0														6955	6955	0	6955	6939														6970	6970
												6952	6952	0	6952	6942														6956	6956	0	6956	6938														6971	6971
												6953	6953	0	6953	6941														6957	6957	0	6957	6937														6972	6972
												6954	6954	0	6954	6940														6970	6970	6866	6970	0														6973	6973
												6955	6955	7049	6955	6939														6971	6971	6865	6971	0														6974	6974
												6956	6956	0	6956	6938														6972	6972	6864	6972	0														6981	6981
												6957	6957	0	6957	6937														6973	6973	6863	6973	0														6982	6982
												6970	6970	6866	6970	0														6974	6974	6862	6974	0														6983	6983
												6971	6971	6865	6971	0														6981	6981	7081	6981	0														6984	6984
												6972	6972	6864	6972	0														6982	6982	7080	6982	0														6985	6985
												6973	6973	6863	6973	0														6983	6983	7079	6983	0														6986	6986
												6974	6974	6862	6974	0														6984	6984	7078	6984	0														6988	6988
												6981	6981	7081	6981	0														6985	6985	7077	6985	0														6993	6993
												6982	6982	7080	6982	0														6986	6986	7076	6986	0														6994	6994
												6983	6983	7079	6983	0														6988	6988	7074	6988	0														6995	6995
												6984	6984	7078	6984	0														6993	6993	0	6993	7003														7001	7001
												6985	6985	7077	6985	0														6994	6994	0	6994	7002														7002	7002
												6986	6986	7076	6986	0														6995	6995	0	6995	7001														7003	7003
												6988	6988	7074	6988	0														6999	6999	6892	6999	0														7006	7006
												6993	6993	0	6993	7003														7000	7000	6891	7000	0														7007	7007
												6994	6994	0	6994	7002														7001	7001	0	7001	6995														7008	7008
												6995	6995	0	6995	7001														7002	7002	0	7002	6994														7009	7009
												7001	7001	0	7001	6995														7003	7003	0	7003	6993														7010	7010
												7002	7002	0	7002	6994														7006	7006	0	7006	7044														7011	7011
												7003	7003	0	7003	6993														7007	7007	0	7007	7043														7012	7012
												7006	7006	0	7006	7044														7008	7008	0	7008	7041														7013	7013
												7007	7007	0	7007	7043														7009	7009	0	7009	7040														7018	7018
												7008	7008	0	7008	7041														7010	7010	0	7010	7038														7019	7019
												7009	7009	0	7009	7040														7011	7011	0	7011	7037														7020	7020
												7010	7010	0	7010	7038														7012	7012	6916	7012	7036														7021	7021
												7011	7011	0	7011	7037														7013	7013	0	7013	7035														7022	7022
												7012	7012	6916	7012	7036														7018	7018	0	7018	7031														7027	7027
												7013	7013	0	7013	7035														7019	7019	0	7019	7030														7028	7028
												7018	7018	0	7018	7031														7020	7020	0	7020	7029														7029	7029
												7019	7019	0	7019	7030														7021	7021	0	7021	7028														7030	7030
												7020	7020	0	7020	7029														7022	7022	0	7022	7027														7031	7031
												7021	7021	0	7021	7028														7027	7027	0	7027	7022														7035	7035
												7022	7022	0	7022	7027														7028	7028	0	7028	7021														7036	7036
												7027	7027	0	7027	7022														7029	7029	0	7029	7020														7037	7037
												7028	7028	0	7028	7021														7030	7030	0	7030	7019														7038	7038
												7029	7029	0	7029	7020														7031	7031	0	7031	7018														7040	7040
												7030	7030	0	7030	7019														7035	7035	0	7035	7013														7041	7041
												7031	7031	0	7031	7018														7036	7036	0	7036	7012														7043	7043
												7035	7035	0	7035	7013														7037	7037	6926	7037	7011														7044	7044
												7036	7036	0	7036	7012														7038	7038	6925	7038	7010														7049	7049
												7037	7037	6926	7037	7011														7040	7040	0	7040	7009														7057	7057
												7038	7038	6925	7038	7010														7041	7041	0	7041	7008														7058	7058
												7039	7039	6924	7039	0														7043	7043	0	7043	7007														7059	7059
												7040	7040	6923	7040	7009														7044	7044	6928	7044	7006														7062	7062
												7041	7041	0	7041	7008														7057	7057	0	7057	7067														7064	7064
												7043	7043	0	7043	7007														7058	7058	0	7058	7066														7065	7065
												7044	7044	6928	7044	7006														7059	7059	0	7059	7065														7066	7066
												7049	7049	6955	7049	0														7062	7062	7117	7062	0														7067	7067
												7057	7057	0	7057	7067														7064	7064	7115	7064	0														7069	7069
												7058	7058	0	7058	7066														7065	7065	0	7065	7059														7070	7070
												7059	7059	0	7059	7065														7066	7066	0	7066	7058														7072	7072
												7062	7062	7117	7062	0														7067	7067	0	7067	7057														7073	7073
												7065	7065	0	7065	7059														7069	7069	0	7069	7175														7074	7074
												7066	7066	0	7066	7058														7070	7070	0	7070	7174														7076	7076
												7067	7067	0	7067	7057														7072	7072	0	7072	7172														7077	7077
												7069	7069	0	7069	7175														7073	7073	0	7073	7171														7078	7078
												7070	7070	0	7070	7174														7074	7074	6988	7074	0														7079	7079
												7072	7072	0	7072	7172														7076	7076	6986	7076	0														7080	7080
												7073	7073	0	7073	7171														7077	7077	6985	7077	0														7081	7081
												7074	7074	6988	7074	0														7078	7078	6984	7078	0														7082	7082
												7076	7076	6986	7076	0														7079	7079	6983	7079	7099														7083	7083
												7077	7077	6985	7077	0														7080	7080	6982	7080	7098														7084	7084
												7078	7078	6984	7078	0														7081	7081	6981	7081	7097														7085	7085
												7079	7079	6983	7079	7099														7082	7082	0	7082	7096														7093	7093
												7080	7080	6982	7080	7098														7083	7083	0	7083	7095														7094	7094
												7081	7081	6981	7081	7097														7084	7084	0	7084	7094														7095	7095
												7082	7082	0	7082	7096														7085	7085	0	7085	7093														7096	7096
												7083	7083	0	7083	7095														7093	7093	0	7093	7085														7097	7097
												7084	7084	0	7084	7094														7094	7094	0	7094	7084														7098	7098
												7085	7085	0	7085	7093														7095	7095	0	7095	7083														7099	7099
												7093	7093	0	7093	7085														7096	7096	0	7096	7082														7113	7113
												7094	7094	0	7094	7084														7097	7097	0	7097	7081														7114	7114
												7095	7095	0	7095	7083														7098	7098	0	7098	7080														7115	7115
												7096	7096	0	7096	7082														7099	7099	0	7099	7079														7116	7116
												7097	7097	0	7097	7081														7113	7113	0	7113	7137														7117	7117
												7098	7098	0	7098	7080														7114	7114	0	7114	7136														7118	7118
												7099	7099	0	7099	7079														7115	7115	7064	7115	7135														7119	7119
												7113	7113	0	7113	7137														7116	7116	0	7116	7134														7120	7120
												7114	7114	0	7114	7136														7117	7117	7062	7117	7133														7121	7121
												7115	7115	0	7115	7135														7118	7118	7141	7118	7132														7129	7129
												7116	7116	0	7116	7134														7119	7119	7140	7119	7131														7130	7130
												7117	7117	7062	7117	7133														7120	7120	7139	7120	7130														7131	7131
												7118	7118	7141	7118	7132														7121	7121	0	7121	7129														7132	7132
												7119	7119	7140	7119	7131														7129	7129	0	7129	7121														7133	7133
												7120	7120	7139	7120	7130														7130	7130	0	7130	7120														7134	7134
												7121	7121	0	7121	7129														7131	7131	0	7131	7119														7135	7135
												7129	7129	0	7129	7121														7132	7132	0	7132	7118														7136	7136
												7130	7130	0	7130	7120														7133	7133	0	7133	7117														7137	7137
												7131	7131	0	7131	7119														7134	7134	0	7134	7116														7139	7139
												7132	7132	0	7132	7118														7135	7135	0	7135	7115														7140	7140
												7133	7133	0	7133	7117														7136	7136	0	7136	7114														7141	7141
												7134	7134	0	7134	7116														7137	7137	7248	7137	7113														7150	7150
												7135	7135	0	7135	7115														7139	7139	7120	7139	0														7151	7151
												7136	7136	0	7136	7114														7140	7140	7119	7140	0														7152	7152
												7137	7137	7248	7137	7113														7141	7141	7118	7141	0														7160	7160
												7139	7139	7120	7139	0														7150	7150	0	7150	7170														7162	7162
												7140	7140	7119	7140	0														7151	7151	0	7151	7169														7168	7168
												7141	7141	7118	7141	0														7152	7152	0	7152	7168														7169	7169
												7151	7151	0	7151	7169														7160	7160	7272	7160	0														7170	7170
												7152	7152	0	7152	7168														7162	7162	7270	7162	0														7171	7171
												7168	7168	7261	7168	7152														7168	7168	7261	7168	7152														7172	7172
												7169	7169	7260	7169	7151														7169	7169	7260	7169	7151														7174	7174
												7171	7171	7257	7171	7073														7170	7170	7259	7170	7150														7175	7175
												7172	7172	7256	7172	7072														7171	7171	7257	7171	7073														7178	7178
												7174	7174	7254	7174	7070														7172	7172	7256	7172	7072														7179	7179
												7175	7175	7253	7175	7069														7174	7174	7254	7174	7070														7248	7248
												7178	7178	7250	7178	0														7175	7175	7253	7175	7069														7249	7249
												7179	7179	7249	7179	0														7178	7178	7250	7178	0														7250	7250
												7248	7248	7137	7248	0														7179	7179	7249	7179	0														7253	7253
												7249	7249	7179	7249	0														7248	7248	7137	7248	0														7254	7254
												7250	7250	7178	7250	0														7249	7249	7179	7249	0														7255	7255
												7253	7253	7175	7253	7275														7250	7250	7178	7250	0														7256	7256
												7254	7254	7174	7254	0														7253	7253	7175	7253	7275														7257	7257
												7255	7255	0	7255	7274														7254	7254	7174	7254	0														7259	7259
												7256	7256	7172	7256	7273														7255	7255	0	7255	7274														7260	7260
												7257	7257	7171	7257	0														7256	7256	7172	7256	7273														7261	7261
												7260	7260	7169	7260	0														7257	7257	7171	7257	0														7270	7270
												7261	7261	7168	7261	0														7259	7259	7170	7259	0														7272	7272
												7273	7273	0	7273	7256														7260	7260	7169	7260	0														7273	7273
												7274	7274	0	7274	7255														7261	7261	7168	7261	0														7274	7274
												7275	7275	0	7275	7253														7270	7270	7162	7270	0														7275	7275
												7290	7290	0	7290	7328														7272	7272	7160	7272	0														7290	7290
												7291	7291	0	7291	7327														7273	7273	0	7273	7256														7291	7291
												7292	7292	0	7292	7326														7274	7274	0	7274	7255														7292	7292
												7293	7293	0	7293	7325														7275	7275	0	7275	7253														7293	7293
												7294	7294	0	7294	7324														7290	7290	0	7290	7328														7294	7294
												7295	7295	0	7295	7323														7291	7291	0	7291	7327														7295	7295
												7299	7299	0	7299	7319														7292	7292	0	7292	7326														7299	7299
												7300	7300	0	7300	7318														7293	7293	0	7293	7325														7300	7300
												7301	7301	0	7301	7317														7294	7294	0	7294	7324														7301	7301
												7302	7302	0	7302	7316														7295	7295	0	7295	7323														7302	7302
												7303	7303	0	7303	7315														7299	7299	0	7299	7319														7303	7303
												7304	7304	0	7304	7314														7300	7300	0	7300	7318														7304	7304
												7305	7305	0	7305	7313														7301	7301	0	7301	7317														7305	7305
												7313	7313	0	7313	7305														7302	7302	0	7302	7316														7313	7313
												7314	7314	0	7314	7304														7303	7303	0	7303	7315														7314	7314
												7315	7315	0	7315	7303														7304	7304	0	7304	7314														7315	7315
												7316	7316	0	7316	7302														7305	7305	0	7305	7313														7316	7316
												7317	7317	0	7317	7301														7313	7313	0	7313	7305														7317	7317
												7318	7318	0	7318	7300														7314	7314	0	7314	7304														7318	7318
												7319	7319	0	7319	7299														7315	7315	0	7315	7303														7319	7319
												7323	7323	0	7323	7295														7316	7316	0	7316	7302														7323	7323
												7324	7324	0	7324	7294														7317	7317	0	7317	7301														7324	7324
												7325	7325	0	7325	7293														7318	7318	0	7318	7300														7325	7325
												7326	7326	0	7326	7292														7319	7319	0	7319	7299														7326	7326
												7327	7327	0	7327	7291														7323	7323	0	7323	7295														7327	7327
												7328	7328	0	7328	7290														7324	7324	0	7324	7294														7328	7328
												7514	7514	0	7514	7528														7325	7325	0	7325	7293														7507	7507
												7515	7515	0	7515	7527														7326	7326	0	7326	7292														7514	7514
												7527	7527	0	7527	7515														7327	7327	0	7327	7291														7515	7515
												7528	7528	0	7528	7514														7328	7328	0	7328	7290														7519	7519
												7590	7590	7613	7590	0														7507	7507	0	7507	7531														7524	7524
												7591	7591	7612	7591	0														7514	7514	0	7514	7528														7527	7527
												7593	7593	7675	7593	0														7515	7515	0	7515	7527														7528	7528
												7594	7594	7674	7594	0														7519	7519	0	7519	7524														7531	7531
												7595	7595	7604	7595	0														7524	7524	0	7524	7519														7590	7590
												7596	7596	7673	7596	0														7527	7527	0	7527	7515														7591	7591
												7604	7604	7595	7604	0														7528	7528	0	7528	7514														7593	7593
												7612	7612	7591	7612	0														7531	7531	0	7531	7507														7594	7594
												7613	7613	7590	7613	0														7590	7590	7613	7590	0														7596	7596
												7668	7668	7775	7668	0														7591	7591	7612	7591	0														7612	7612
												7670	7670	7773	7670	0														7593	7593	7675	7593	0														7613	7613
												7671	7671	7772	7671	0														7594	7594	7674	7594	0														7615	7615
												7673	7673	7596	7673	0														7596	7596	7673	7596	0														7616	7616
												7674	7674	7594	7674	0														7607	7607	0	7607	7664														7668	7668
												7675	7675	7593	7675	0														7612	7612	7591	7612	0														7670	7670
												7705	7705	7770	7705	0														7613	7613	7590	7613	0														7671	7671
												7713	7713	7763	7713	0														7615	7615	0	7615	7716														7673	7673
												7763	7763	7713	7763	0														7616	7616	0	7616	7715														7674	7674
												7768	7768	7783	7768	0														7664	7664	0	7664	7607														7675	7675
												7770	7770	7705	7770	0														7668	7668	7775	7668	0														7705	7705
												7772	7772	7671	7772	0														7670	7670	7773	7670	0														7713	7713
												7773	7773	7670	7773	0														7671	7671	7772	7671	0														7715	7715
												7775	7775	7668	7775	0														7673	7673	7596	7673	0														7716	7716
												7783	7783	7768	7783	0														7674	7674	7594	7674	0														7763	7763
												7790	7790	7878	7790	0														7675	7675	7593	7675	0														7765	7765
												7791	7791	7877	7791	0														7705	7705	7770	7705	0														7766	7766
												7792	7792	7876	7792	0														7713	7713	7763	7713	0														7767	7767
												7797	7797	7871	7797	0														7715	7715	0	7715	7616														7768	7768
												7798	7798	7870	7798	0														7716	7716	0	7716	7615														7770	7770
												7870	7870	7798	7870	7878														7763	7763	7713	7763	0														7772	7772
												7871	7871	7797	7871	7877														7765	7765	7786	7765	0														7773	7773
												7876	7876	7792	7876	0														7766	7766	7785	7766	0														7775	7775
												7877	7877	7791	7877	7871														7767	7767	7784	7767	0														7783	7783
												7878	7878	7790	7878	7870														7768	7768	7783	7768	0														7784	7784
												7908	7908	7983	7908	0														7770	7770	7705	7770	0														7785	7785
												7909	7909	7982	7909	0														7772	7772	7671	7772	0														7786	7786
												7910	7910	7981	7910	0														7773	7773	7670	7773	0														7790	7790
												7911	7911	7980	7911	0														7775	7775	7668	7775	0														7791	7791
												7912	7912	7979	7912	0														7783	7783	7768	7783	0														7792	7792
												7916	7916	7975	7916	0														7784	7784	7767	7784	0														7797	7797
												7917	7917	7973	7917	7937														7785	7785	7766	7785	0														7798	7798
												7918	7918	7972	7918	7936														7786	7786	7765	7786	0														7870	7870
												7919	7919	7971	7919	0														7790	7790	7878	7790	0														7871	7871
												7920	7920	7970	7920	7935														7791	7791	7877	7791	0														7876	7876
												7921	7921	7969	7921	7934														7792	7792	7876	7792	0														7877	7877
												7922	7922	7968	7922	7933														7797	7797	7871	7797	0														7878	7878
												7923	7923	7966	7923	7932														7798	7798	7870	7798	0														7908	7908
												7928	7928	7961	7928	0														7870	7870	7798	7870	7878														7909	7909
												7929	7929	7960	7929	0														7871	7871	7797	7871	7877														7910	7910
												7932	7932	0	7932	7923														7876	7876	7792	7876	0														7911	7911
												7933	7933	0	7933	7922														7877	7877	7791	7877	7871														7912	7912
												7934	7934	0	7934	7921														7878	7878	7790	7878	7870														7916	7916
												7935	7935	0	7935	7920														7908	7908	7983	7908	0														7917	7917
												7936	7936	0	7936	7918														7909	7909	7982	7909	0														7918	7918
												7937	7937	0	7937	7917														7910	7910	7981	7910	0														7919	7919
												7943	7943	0	7943	8050														7911	7911	7980	7911	0														7920	7920
												7960	7960	7929	7960	0														7912	7912	7979	7912	0														7921	7921
												7961	7961	7928	7961	0														7916	7916	7975	7916	0														7922	7922
												7964	7964	0	7964	8072														7917	7917	7973	7917	7937														7923	7923
												7966	7966	7923	7966	8028														7918	7918	7972	7918	7936														7928	7928
												7967	7967	0	7967	8027														7919	7919	7971	7919	0														7929	7929
												7968	7968	7922	7968	8025														7920	7920	7970	7920	7935														7932	7932
												7969	7969	7921	7969	8024														7921	7921	7969	7921	7934														7933	7933
												7970	7970	7920	7970	8023														7922	7922	7968	7922	7933														7934	7934
												7971	7971	7919	7971	8022														7923	7923	7966	7923	7932														7935	7935
												7972	7972	7918	7972	8021														7928	7928	7961	7928	0														7936	7936
												7973	7973	7917	7973	0														7929	7929	7960	7929	0														7937	7937
												7975	7975	7916	7975	8018														7932	7932	0	7932	7923														7943	7943
												7979	7979	7912	7979	0														7933	7933	0	7933	7922														7960	7960
												7980	7980	7911	7980	0														7934	7934	0	7934	7921														7961	7961
												7981	7981	7910	7981	0														7935	7935	0	7935	7920														7964	7964
												7982	7982	7909	7982	0														7936	7936	0	7936	7918														7966	7966
												7983	7983	7908	7983	0														7937	7937	0	7937	7917														7967	7967
												8018	8018	0	8018	7975														7943	7943	0	7943	8050														7968	7968
												8021	8021	0	8021	7972														7960	7960	7929	7960	0														7969	7969
												8022	8022	0	8022	7971														7961	7961	7928	7961	0														7970	7970
												8023	8023	0	8023	7970														7964	7964	0	7964	8072														7971	7971
												8024	8024	0	8024	7969														7966	7966	7923	7966	8028														7972	7972
												8025	8025	0	8025	7968														7967	7967	0	7967	8027														7973	7973
												8027	8027	0	8027	7967														7968	7968	7922	7968	8025														7975	7975
												8028	8028	0	8028	7966														7969	7969	7921	7969	8024														7979	7979
												8050	8050	0	8050	7943														7970	7970	7920	7970	8023														7980	7980
												8069	8069	8146	8069	0														7971	7971	7919	7971	8022														7981	7981
												8072	8072	0	8072	7964														7972	7972	7918	7972	8021														7982	7982
												8077	8077	8173	8077	0														7973	7973	7917	7973	0														7983	7983
												8078	8078	8172	8078	0														7975	7975	7916	7975	8018														8018	8018
												8088	8088	8096	8088	0														7979	7979	7912	7979	0														8021	8021
												8093	8093	8197	8093	0														7980	7980	7911	7980	0														8022	8022
												8094	8094	8196	8094	0														7981	7981	7910	7981	0														8023	8023
												8095	8095	8195	8095	0														7982	7982	7909	7982	0														8024	8024
												8096	8096	8088	8096	0														7983	7983	7908	7983	0														8025	8025
												8100	8100	8216	8100	0														8018	8018	0	8018	7975														8027	8027
												8102	8102	8189	8102	8215														8021	8021	0	8021	7972														8028	8028
												8103	8103	0	8103	8214														8022	8022	0	8022	7971														8050	8050
												8104	8104	0	8104	8213														8023	8023	0	8023	7970														8069	8069
												8105	8105	0	8105	8212														8024	8024	0	8024	7969														8072	8072
												8109	8109	0	8109	8225														8025	8025	0	8025	7968														8077	8077
												8110	8110	0	8110	8224														8027	8027	0	8027	7967														8078	8078
												8114	8114	0	8114	8218														8028	8028	0	8028	7966														8088	8088
												8125	8125	0	8125	8205														8050	8050	0	8050	7943														8093	8093
												8127	8127	8213	8127	0														8069	8069	8146	8069	0														8094	8094
												8131	8131	8155	8131	0														8072	8072	0	8072	7964														8095	8095
												8132	8132	8154	8132	0														8077	8077	8173	8077	0														8096	8096
												8133	8133	8204	8133	8247														8078	8078	8172	8078	0														8102	8102
												8134	8134	0	8134	8246														8088	8088	8096	8088	0														8103	8103
												8137	8137	8168	8137	8171														8093	8093	8197	8093	0														8104	8104
												8138	8138	0	8138	8170														8094	8094	8196	8094	0														8105	8105
												8139	8139	0	8139	8169														8095	8095	8195	8095	0														8109	8109
												8141	8141	0	8141	8167														8096	8096	8088	8096	0														8110	8110
												8142	8142	0	8142	8166														8102	8102	8189	8102	8215														8114	8114
												8143	8143	0	8143	8165														8103	8103	0	8103	8214														8125	8125
												8144	8144	0	8144	8164														8104	8104	0	8104	8213														8127	8127
												8145	8145	8182	8145	8163														8105	8105	0	8105	8212														8131	8131
												8146	8146	8069	8146	8162														8109	8109	0	8109	8225														8132	8132
												8147	8147	0	8147	8161														8110	8110	0	8110	8224														8133	8133
												8150	8150	0	8150	8158														8114	8114	0	8114	8218														8134	8134
												8151	8151	0	8151	8157														8125	8125	0	8125	8205														8137	8137
												8152	8152	0	8152	8156														8127	8127	8213	8127	0														8138	8138
												8154	8154	8132	8154	0														8131	8131	8155	8131	0														8139	8139
												8155	8155	8131	8155	0														8132	8132	8154	8132	0														8141	8141
												8156	8156	8177	8156	8152														8133	8133	8204	8133	8247														8142	8142
												8157	8157	0	8157	8151														8134	8134	0	8134	8246														8143	8143
												8158	8158	0	8158	8150														8137	8137	8168	8137	8171														8144	8144
												8161	8161	0	8161	8147														8138	8138	0	8138	8170														8145	8145
												8162	8162	8180	8162	8146														8139	8139	0	8139	8169														8146	8146
												8163	8163	8179	8163	8145														8141	8141	0	8141	8167														8147	8147
												8164	8164	8178	8164	8144														8142	8142	0	8142	8166														8150	8150
												8165	8165	0	8165	8143														8143	8143	0	8143	8165														8151	8151
												8166	8166	0	8166	8142														8144	8144	0	8144	8164														8152	8152
												8167	8167	0	8167	8141														8145	8145	8182	8145	8163														8154	8154
												8168	8168	8137	8168	0														8146	8146	8069	8146	8162														8155	8155
												8169	8169	0	8169	8139														8147	8147	0	8147	8161														8156	8156
												8170	8170	0	8170	8138														8150	8150	0	8150	8158														8157	8157
												8171	8171	0	8171	8137														8151	8151	0	8151	8157														8158	8158
												8172	8172	8078	8172	0														8152	8152	0	8152	8156														8161	8161
												8173	8173	8077	8173	0														8154	8154	8132	8154	0														8162	8162
												8174	8174	8292	8174	0														8155	8155	8131	8155	0														8163	8163
												8175	8175	8193	8175	0														8156	8156	8177	8156	8152														8164	8164
												8176	8176	8192	8176	0														8157	8157	0	8157	8151														8165	8165
												8177	8177	8156	8177	0														8158	8158	0	8158	8150														8166	8166
												8178	8178	8164	8178	8190														8161	8161	0	8161	8147														8167	8167
												8179	8179	8163	8179	8189														8162	8162	8180	8162	8146														8168	8168
												8180	8180	8162	8180	8188														8163	8163	8179	8163	8145														8169	8169
												8181	8181	0	8181	8187														8164	8164	8178	8164	8144														8170	8170
												8182	8182	8145	8182	0														8165	8165	0	8165	8143														8171	8171
												8187	8187	0	8187	8181														8166	8166	0	8166	8142														8172	8172
												8188	8188	0	8188	8180														8167	8167	0	8167	8141														8173	8173
												8189	8189	8102	8189	8179														8168	8168	8137	8168	0														8174	8174
												8190	8190	0	8190	8178														8169	8169	0	8169	8139														8175	8175
												8191	8191	8203	8191	0														8170	8170	0	8170	8138														8176	8176
												8192	8192	8176	8192	0														8171	8171	0	8171	8137														8177	8177
												8193	8193	8175	8193	0														8172	8172	8078	8172	0														8178	8178
												8195	8195	8095	8195	0														8173	8173	8077	8173	0														8179	8179
												8196	8196	8094	8196	8235														8174	8174	8292	8174	0														8180	8180
												8197	8197	8093	8197	0														8175	8175	8193	8175	0														8181	8181
												8198	8198	8255	8198	0														8176	8176	8192	8176	0														8182	8182
												8199	8199	8254	8199	8232														8177	8177	8156	8177	0														8187	8187
												8200	8200	8253	8200	8231														8178	8178	8164	8178	8190														8188	8188
												8201	8201	8252	8201	8230														8179	8179	8163	8179	8189														8189	8189
												8202	8202	0	8202	8228														8180	8180	8162	8180	8188														8190	8190
												8203	8203	8191	8203	8227														8181	8181	0	8181	8187														8191	8191
												8204	8204	8133	8204	8226														8182	8182	8145	8182	0														8192	8192
												8205	8205	0	8205	8125														8187	8187	0	8187	8181														8193	8193
												8208	8208	0	8208	8223														8188	8188	0	8188	8180														8195	8195
												8209	8209	0	8209	8222														8189	8189	8102	8189	8179														8196	8196
												8210	8210	0	8210	8221														8190	8190	0	8190	8178														8197	8197
												8212	8212	0	8212	8105														8191	8191	8203	8191	0														8198	8198
												8213	8213	8127	8213	8104														8192	8192	8176	8192	0														8199	8199
												8214	8214	0	8214	8103														8193	8193	8175	8193	0														8200	8200
												8215	8215	0	8215	8102														8195	8195	8095	8195	0														8201	8201
												8216	8216	8100	8216	0														8196	8196	8094	8196	8235														8202	8202
												8218	8218	0	8218	8114														8197	8197	8093	8197	0														8203	8203
												8221	8221	8283	8221	8210														8199	8199	8254	8199	8232														8204	8204
												8222	8222	8282	8222	8209														8200	8200	8253	8200	8231														8205	8205
												8223	8223	0	8223	8208														8201	8201	8252	8201	8230														8208	8208
												8224	8224	0	8224	8110														8202	8202	0	8202	8228														8209	8209
												8225	8225	0	8225	8109														8203	8203	8191	8203	8227														8210	8210
												8226	8226	0	8226	8204														8204	8204	8133	8204	8226														8212	8212
												8227	8227	8276	8227	8203														8205	8205	0	8205	8125														8213	8213
												8228	8228	8275	8228	8202														8208	8208	0	8208	8223														8214	8214
												8229	8229	8274	8229	0														8209	8209	0	8209	8222														8215	8215
												8230	8230	0	8230	8201														8210	8210	0	8210	8221														8218	8218
												8231	8231	0	8231	8200														8212	8212	0	8212	8105														8221	8221
												8232	8232	0	8232	8199														8213	8213	8127	8213	8104														8222	8222
												8235	8235	0	8235	8196														8214	8214	0	8214	8103														8223	8223
												8245	8245	8260	8245	0														8215	8215	0	8215	8102														8224	8224
												8246	8246	8331	8246	8134														8218	8218	0	8218	8114														8225	8225
												8247	8247	0	8247	8133														8221	8221	8283	8221	8210														8226	8226
												8252	8252	8201	8252	0														8222	8222	8282	8222	8209														8227	8227
												8253	8253	8200	8253	0														8223	8223	0	8223	8208														8228	8228
												8254	8254	8199	8254	0														8224	8224	0	8224	8110														8229	8229
												8255	8255	8198	8255	0														8225	8225	0	8225	8109														8230	8230
												8260	8260	8245	8260	0														8226	8226	0	8226	8204														8231	8231
												8267	8267	8382	8267	0														8227	8227	8276	8227	8203														8232	8232
												8268	8268	8381	8268	0														8228	8228	8275	8228	8202														8235	8235
												8269	8269	8380	8269	0														8229	8229	8274	8229	0														8245	8245
												8270	8270	8379	8270	0														8230	8230	0	8230	8201														8246	8246
												8271	8271	8378	8271	0														8231	8231	0	8231	8200														8247	8247
												8272	8272	8377	8272	0														8232	8232	0	8232	8199														8248	8248
												8273	8273	8376	8273	0														8235	8235	0	8235	8196														8249	8249
												8274	8274	8229	8274	0														8245	8245	8260	8245	0														8252	8252
												8275	8275	8228	8275	0														8246	8246	8331	8246	8134														8253	8253
												8276	8276	8227	8276	0														8247	8247	0	8247	8133														8254	8254
												8277	8277	8392	8277	0														8248	8248	8257	8248	0														8255	8255
												8279	8279	8390	8279	0														8249	8249	8256	8249	0														8256	8256
												8280	8280	8389	8280	0														8250	8250	8255	8250	0														8257	8257
												8282	8282	8222	8282	0														8252	8252	8201	8252	0														8260	8260
												8283	8283	8221	8283	0														8253	8253	8200	8253	0														8267	8267
												8292	8292	8174	8292	0														8254	8254	8199	8254	0														8268	8268
												8319	8319	0	8319	8349														8255	8255	8250	8255	0														8269	8269
												8320	8320	0	8320	8348														8256	8256	8249	8256	0														8274	8274
												8321	8321	0	8321	8347														8257	8257	8248	8257	0														8275	8275
												8322	8322	8415	8322	8344														8260	8260	8245	8260	0														8276	8276
												8323	8323	0	8323	8343														8269	8269	8380	8269	0														8277	8277
												8324	8324	0	8324	8342														8270	8270	8379	8270	0														8279	8279
												8325	8325	0	8325	8341														8271	8271	8378	8271	0														8280	8280
												8326	8326	0	8326	8340														8272	8272	8377	8272	0														8282	8282
												8327	8327	0	8327	8339														8273	8273	8376	8273	0														8283	8283
												8328	8328	0	8328	8338														8274	8274	8229	8274	0														8292	8292
												8329	8329	0	8329	8337														8275	8275	8228	8275	0														8305	8305
												8331	8331	8246	8331	0														8276	8276	8227	8276	0														8319	8319
												8337	8337	0	8337	8329														8277	8277	8392	8277	0														8320	8320
												8338	8338	0	8338	8328														8279	8279	8390	8279	0														8321	8321
												8339	8339	0	8339	8327														8280	8280	8389	8280	0														8322	8322
												8340	8340	0	8340	8326														8282	8282	8222	8282	0														8323	8323
												8341	8341	0	8341	8325														8283	8283	8221	8283	0														8324	8324
												8342	8342	0	8342	8324														8292	8292	8174	8292	0														8325	8325
												8343	8343	0	8343	8323														8319	8319	0	8319	8349														8326	8326
												8344	8344	0	8344	8322														8320	8320	0	8320	8348														8327	8327
												8347	8347	8396	8347	8321														8321	8321	0	8321	8347														8328	8328
												8348	8348	0	8348	8320														8322	8322	8415	8322	8344														8329	8329
												8349	8349	0	8349	8319														8323	8323	0	8323	8343														8331	8331
												8374	8374	8413	8374	0														8324	8324	0	8324	8342														8337	8337
												8375	8375	8412	8375	0														8325	8325	0	8325	8341														8338	8338
												8376	8376	8273	8376	0														8326	8326	0	8326	8340														8339	8339
												8377	8377	8272	8377	0														8327	8327	0	8327	8339														8340	8340
												8378	8378	8271	8378	0														8328	8328	0	8328	8338														8341	8341
												8379	8379	8270	8379	0														8329	8329	0	8329	8337														8342	8342
												8380	8380	8269	8380	0														8331	8331	8246	8331	0														8343	8343
												8381	8381	8268	8381	0														8337	8337	0	8337	8329														8344	8344
												8382	8382	8267	8382	0														8338	8338	0	8338	8328														8347	8347
												8383	8383	8405	8383	0														8339	8339	0	8339	8327														8348	8348
												8387	8387	8401	8387	0														8340	8340	0	8340	8326														8349	8349
												8388	8388	8400	8388	0														8341	8341	0	8341	8325														8373	8373
												8389	8389	8280	8389	0														8342	8342	0	8342	8324														8374	8374
												8390	8390	8279	8390	0														8343	8343	0	8343	8323														8375	8375
												8391	8391	8436	8391	0														8344	8344	0	8344	8322														8376	8376
												8392	8392	8277	8392	8435														8347	8347	8396	8347	8321														8377	8377
												8393	8393	0	8393	8434														8348	8348	0	8348	8320														8378	8378
												8394	8394	0	8394	8433														8349	8349	0	8349	8319														8379	8379
												8395	8395	0	8395	8432														8374	8374	8413	8374	0														8380	8380
												8396	8396	8347	8396	0														8375	8375	8412	8375	0														8381	8381
												8399	8399	0	8399	8430														8376	8376	8273	8376	0														8382	8382
												8400	8400	8388	8400	0														8377	8377	8272	8377	0														8383	8383
												8401	8401	8387	8401	0														8378	8378	8271	8378	0														8387	8387
												8405	8405	8383	8405	8424														8379	8379	8270	8379	0														8388	8388
												8406	8406	0	8406	8423														8380	8380	8269	8380	0														8389	8389
												8408	8408	0	8408	8421														8387	8387	8401	8387	0														8390	8390
												8412	8412	8375	8412	8417														8388	8388	8400	8388	0														8391	8391
												8413	8413	8374	8413	0														8389	8389	8280	8389	0														8392	8392
												8415	8415	8322	8415	0														8390	8390	8279	8390	0														8393	8393
												8417	8417	0	8417	8412														8391	8391	8436	8391	0														8394	8394
												8421	8421	0	8421	8408														8392	8392	8277	8392	8435														8395	8395
												8423	8423	0	8423	8406														8393	8393	0	8393	8434														8396	8396
												8424	8424	0	8424	8405														8394	8394	0	8394	8433														8399	8399
												8430	8430	0	8430	8399														8395	8395	0	8395	8432														8400	8400
												8432	8432	0	8432	8395														8396	8396	8347	8396	0														8401	8401
												8433	8433	0	8433	8394														8399	8399	0	8399	8430														8404	8404
												8434	8434	0	8434	8393														8400	8400	8388	8400	0														8405	8405
												8435	8435	0	8435	8392														8401	8401	8387	8401	0														8406	8406
												8436	8436	8391	8436	0														8405	8405	0	8405	8424														8408	8408
												8502	8502	8565	8502	0														8406	8406	0	8406	8423														8409	8409
												8513	8513	8552	8513	0														8408	8408	0	8408	8421														8410	8410
												8515	8515	8559	8515	0														8412	8412	8375	8412	8417														8411	8411
												8516	8516	8558	8516	0														8413	8413	8374	8413	0														8412	8412
												8517	8517	8557	8517	0														8415	8415	8322	8415	0														8413	8413
												8518	8518	8556	8518	0														8417	8417	0	8417	8412														8414	8414
												8525	8525	0	8525	8549														8421	8421	0	8421	8408														8415	8415
												8526	8526	0	8526	8548														8423	8423	0	8423	8406														8417	8417
												8527	8527	0	8527	8547														8424	8424	0	8424	8405														8421	8421
												8528	8528	0	8528	8546														8430	8430	0	8430	8399														8423	8423
												8546	8546	0	8546	8528														8432	8432	0	8432	8395														8424	8424
												8547	8547	0	8547	8527														8433	8433	0	8433	8394														8430	8430
												8548	8548	0	8548	8526														8434	8434	0	8434	8393														8432	8432
												8549	8549	0	8549	8525														8435	8435	0	8435	8392														8433	8433
												8552	8552	8513	8552	0														8436	8436	8391	8436	0														8434	8434
												8553	8553	0	8553	8581														8512	8512	8553	8512	0														8435	8435
												8555	8555	0	8555	8579														8513	8513	8552	8513	0														8436	8436
												8556	8556	8518	8556	8578														8515	8515	8559	8515	0														8441	8441
												8557	8557	8517	8557	8577														8516	8516	8558	8516	0														8442	8442
												8558	8558	8516	8558	8576														8517	8517	8557	8517	0														8512	8512
												8559	8559	8515	8559	8574														8518	8518	8556	8518	0														8513	8513
												8560	8560	0	8560	8573														8519	8519	8555	8519	0														8515	8515
												8561	8561	0	8561	8572														8525	8525	0	8525	8549														8516	8516
												8562	8562	0	8562	8571														8526	8526	0	8526	8548														8517	8517
												8565	8565	8502	8565	0														8527	8527	0	8527	8547														8518	8518
												8571	8571	0	8571	8562														8528	8528	0	8528	8546														8525	8525
												8572	8572	0	8572	8561														8546	8546	0	8546	8528														8526	8526
												8573	8573	0	8573	8560														8547	8547	0	8547	8527														8527	8527
												8574	8574	0	8574	8559														8548	8548	0	8548	8526														8528	8528
												8576	8576	0	8576	8558														8549	8549	0	8549	8525														8546	8546
												8577	8577	0	8577	8557														8552	8552	8513	8552	0														8547	8547
												8578	8578	0	8578	8556														8553	8553	8512	8553	8581														8548	8548
												8579	8579	0	8579	8555														8555	8555	8519	8555	8579														8549	8549
												8581	8581	0	8581	8553														8556	8556	8518	8556	8578														8550	8550
												8619	8619	0	8619	8640														8557	8557	8517	8557	8577														8551	8551
												8620	8620	0	8620	8639														8558	8558	8516	8558	8576														8552	8552
												8622	8622	0	8622	8637														8559	8559	8515	8559	8574														8553	8553
												8623	8623	0	8623	8636														8560	8560	0	8560	8573														8555	8555
												8636	8636	0	8636	8623														8561	8561	0	8561	8572														8556	8556
												8637	8637	0	8637	8622														8562	8562	0	8562	8571														8557	8557
												8639	8639	0	8639	8620														8571	8571	0	8571	8562														8558	8558
												8640	8640	0	8640	8619														8572	8572	0	8572	8561														8559	8559
												8652	8652	0	8652	8662														8573	8573	0	8573	8560														8560	8560
												8653	8653	0	8653	8661														8574	8574	0	8574	8559														8561	8561
												8654	8654	0	8654	8660														8576	8576	0	8576	8558														8562	8562
												8660	8660	0	8660	8654														8577	8577	0	8577	8557														8571	8571
												8661	8661	0	8661	8653														8578	8578	0	8578	8556														8572	8572
												8662	8662	0	8662	8652														8579	8579	0	8579	8555														8573	8573
												8687	8687	8692	8687	0														8581	8581	0	8581	8553														8574	8574
												8692	8692	8687	8692	0														8619	8619	0	8619	8640														8576	8576
												8840	8840	0	8840	8846														8620	8620	0	8620	8639														8577	8577
												8846	8846	0	8846	8840														8622	8622	0	8622	8637														8578	8578
												8857	8857	0	8857	8973														8623	8623	0	8623	8636														8579	8579
												8858	8858	0	8858	8972														8636	8636	0	8636	8623														8581	8581
												8860	8860	0	8860	8970														8637	8637	0	8637	8622														8617	8617
												8913	8913	8967	8913	0														8639	8639	0	8639	8620														8619	8619
												8925	8925	0	8925	8959														8640	8640	0	8640	8619														8620	8620
												8929	8929	8953	8929	0														8652	8652	0	8652	8662														8622	8622
												8930	8930	8952	8930	0														8653	8653	0	8653	8661														8623	8623
												8932	8932	8950	8932	0														8654	8654	0	8654	8660														8636	8636
												8950	8950	8932	8950	0														8660	8660	0	8660	8654														8637	8637
												8952	8952	8930	8952	0														8661	8661	0	8661	8653														8639	8639
												8953	8953	8929	8953	0														8662	8662	0	8662	8652														8640	8640
												8959	8959	0	8959	8925														8687	8687	8692	8687	0														8642	8642
												8967	8967	8913	8967	0														8692	8692	8687	8692	0														8652	8652
												8970	8970	0	8970	8860														8840	8840	0	8840	8846														8653	8653
												8972	8972	0	8972	8858														8846	8846	0	8846	8840														8654	8654
												8973	8973	0	8973	8857														8857	8857	0	8857	8973														8660	8660
												8974	8974	8978	8974	0														8858	8858	0	8858	8972														8661	8661
												8978	8978	8974	8978	0														8860	8860	0	8860	8970														8662	8662
												9145	9145	0	9145	9165														8913	8913	8967	8913	0														8687	8687
												9165	9165	0	9165	9145														8925	8925	0	8925	8959														8692	8692
																														8929	8929	8953	8929	0														8840	8840
																														8930	8930	8952	8930	0														8846	8846
																														8932	8932	8950	8932	0														8857	8857
																														8950	8950	8932	8950	0														8858	8858
																														8952	8952	8930	8952	0														8860	8860
																														8953	8953	8929	8953	0														8913	8913
																														8959	8959	0	8959	8925														8925	8925
																														8967	8967	8913	8967	0														8929	8929
																														8970	8970	0	8970	8860														8930	8930
																														8972	8972	0	8972	8858														8932	8932
																														8973	8973	0	8973	8857														8950	8950
																														8974	8974	8978	8974	0														8952	8952
																														8978	8978	8974	8978	0														8953	8953
																														9145	9145	0	9145	9165														8959	8959
																														9165	9165	0	9165	9145														8967	8967
																																																8970	8970
																																																8972	8972
																																																8973	8973
																																																8974	8974
																																																8978	8978
																																																9145	9145
																																																9165	9165
[truncated: 3 more columns]

## Sheet: HIV SF1 -2 CT Comparison
Reference File= HIV-1_SF1_100_mono_-2.ct						Reference File= HIV-1_SF1_100_di_-2.ct						Reference File= HIV-1_SF1_100_mono_-2.ct						Reference File= HIV-1_SF1_100_di_-2.ct						Reference File= HIV-1_SF1_1000_mono_-2.ct						Reference File= HIV-1_SF1_1000_di_-2.ct
Number of nucleotides paired: 566						Number of nucleotides paired: 408						Number of nucleotides paired: 566						Number of nucleotides paired: 408						Number of nucleotides paired: 582						Number of nucleotides paired: 410
Number of nucleotides unpaired: 8607						Number of nucleotides unpaired: 8765						Number of nucleotides unpaired: 8607						Number of nucleotides unpaired: 8765						Number of nucleotides unpaired: 8591						Number of nucleotides unpaired: 8763
Percent of nucleotides paired: 6.1702823503761035%						Percent of nucleotides paired: 4.447836040553799%						Percent of nucleotides paired: 6.1702823503761035%						Percent of nucleotides paired: 4.447836040553799%						Percent of nucleotides paired: 6.344707293142919%						Percent of nucleotides paired: 4.4696391583996515%
Target File= HIV-1_SF1_1000_mono_-2.ct						Target File= HIV-1_SF1_1000_di_-2.ct						Target File= HIV-1_SF1_10000_mono_-2.ct						Target File= HIV-1_SF1_10000_di_-2.ct						Target File= HIV-1_SF1_10000_mono_-2.ct						Target File= HIV-1_SF1_10000_di_-2.ct
Number of nucleotides paired: 582						Number of nucleotides paired: 410						Number of nucleotides paired: 582						Number of nucleotides paired: 416						Number of nucleotides paired: 582						Number of nucleotides paired: 416
Number of nucleotides unpaired: 8591						Number of nucleotides unpaired: 8763						Number of nucleotides unpaired: 8591						Number of nucleotides unpaired: 8757						Number of nucleotides unpaired: 8591						Number of nucleotides unpaired: 8757
Percent of nucleotides paired: 6.344707293142919%						Percent of nucleotides paired: 4.4696391583996515%						Percent of nucleotides paired: 6.344707293142919%						Percent of nucleotides paired: 4.535048511937207%						Percent of nucleotides paired: 6.344707293142919%						Percent of nucleotides paired: 4.535048511937207%
Comparison of reference file to target file:						Comparison of reference file to target file:						Comparison of reference file to target file:						Comparison of reference file to target file:						Comparison of reference file to target file:						Comparison of reference file to target file:
Reference File= HIV-1_SF1_100_mono_-2.ct						Reference File= HIV-1_SF1_100_di_-2.ct						Reference File= HIV-1_SF1_100_mono_-2.ct						Reference File= HIV-1_SF1_100_di_-2.ct						Reference File= HIV-1_SF1_1000_mono_-2.ct						Reference File= HIV-1_SF1_1000_di_-2.ct
Target File= HIV-1_SF1_1000_mono_-2.ct						Target File= HIV-1_SF1_1000_di_-2.ct						Target File= HIV-1_SF1_10000_mono_-2.ct						Target File= HIV-1_SF1_10000_di_-2.ct						Target File= HIV-1_SF1_10000_mono_-2.ct						Target File= HIV-1_SF1_10000_di_-2.ct
Number of consistent nts/pairings: 9157						Number of consistent nts/pairings: 9159						Number of consistent nts/pairings: 9157						Number of consistent nts/pairings: 9165						Number of consistent nts/pairings: 9173						Number of consistent nts/pairings: 9167
Number of conflicting nts/pairings: 16						Number of conflicting nts/pairings: 14						Number of conflicting nts/pairings: 16						Number of conflicting nts/pairings: 8						Number of conflicting nts/pairings: 0						Number of conflicting nts/pairings: 6
Percent consistency between files: 99.83%						Percent consistency between files: 99.85%						Percent consistency between files: 99.83%						Percent consistency between files: 99.91%						Percent consistency between files: 100.0%						Percent consistency between files: 99.93%
Conflicting BPs between the Reference and Target file						Conflicting BPs between the Reference and Target file						Conflicting BPs between the Reference and Target file						Conflicting BPs between the Reference and Target file						Conflicting BPs between the Reference and Target file						Conflicting BPs between the Reference and Target file
Position	reference(i)	reference(j)	target(i)	target(j)		Position	reference(i)	reference(j)	target(i)	target(j)		Position	reference(i)	reference(j)	target(i)	target(j)		Position	reference(i)	reference(j)	target(i)	target(j)		Position	reference(i)	reference(j)	target(i)	target(j)		Position	reference(i)	reference(j)	target(i)	target(j)
1060	1060	0	1060	1068		1615	1615	0	1615	1625		1060	1060	0	1060	1068		1615	1615	0	1615	1625								3811	3811	0	3811	3906
1061	1061	0	1061	1067		1616	1616	0	1616	1624		1061	1061	0	1061	1067		1616	1616	0	1616	1624								3906	3906	0	3906	3811
1067	1067	0	1067	1061		1617	1617	0	1617	1623		1067	1067	0	1067	1061		1617	1617	0	1617	1623								5066	5066	0	5066	5144
1068	1068	0	1068	1060		1623	1623	0	1623	1617		1068	1068	0	1068	1060		1623	1623	0	1623	1617								5067	5067	0	5067	5143
1201	1201	0	1201	1301		1624	1624	0	1624	1616		1201	1201	0	1201	1301		1624	1624	0	1624	1616								5143	5143	0	5143	5067
1206	1206	0	1206	1294		1625	1625	0	1625	1615		1206	1206	0	1206	1294		1625	1625	0	1625	1615								5144	5144	0	5144	5066
1294	1294	0	1294	1206		2779	2779	0	2779	2804		1294	1294	0	1294	1206		2779	2779	0	2779	2804
1301	1301	0	1301	1201		2804	2804	0	2804	2779		1301	1301	0	1301	1201		2804	2804	0	2804	2779
1554	1554	0	1554	1571		3811	3811	3906	3811	0		1554	1554	0	1554	1571
1555	1555	0	1555	1570		3906	3906	3811	3906	0		1555	1555	0	1555	1570
1556	1556	0	1556	1569		5066	5066	5144	5066	0		1556	1556	0	1556	1569
1557	1557	0	1557	1568		5067	5067	5143	5067	0		1557	1557	0	1557	1568
1568	1568	0	1568	1557		5143	5143	5067	5143	0		1568	1568	0	1568	1557
1569	1569	0	1569	1556		5144	5144	5066	5144	0		1569	1569	0	1569	1556
1570	1570	0	1570	1555								1570	1570	0	1570	1555
1571	1571	0	1571	1554								1571	1571	0	1571	1554

## Sheet: HIV SF1 -1 CT Comparison
Reference File= HIV-1_SF1_100_mono_-1.ct						Reference File= HIV-1_SF1_100_di_-1.ct						Reference File= HIV-1_SF1_100_mono_-1.ct						Reference File= HIV-1_SF1_100_di_-1.ct						Reference File= HIV-1_SF1_1000_mono_-1.ct						Reference File= HIV-1_SF1_1000_di_-1.ct
Number of nucleotides paired: 1430						Number of nucleotides paired: 1058						Number of nucleotides paired: 1430						Number of nucleotides paired: 1058						Number of nucleotides paired: 1422						Number of nucleotides paired: 1050
Number of nucleotides unpaired: 7743						Number of nucleotides unpaired: 8115						Number of nucleotides unpaired: 7743						Number of nucleotides unpaired: 8115						Number of nucleotides unpaired: 7751						Number of nucleotides unpaired: 8123
Percent of nucleotides paired: 15.58922925978415%						Percent of nucleotides paired: 11.533849340455685%						Percent of nucleotides paired: 15.58922925978415%						Percent of nucleotides paired: 11.533849340455685%						Percent of nucleotides paired: 15.502016788400741%						Percent of nucleotides paired: 11.446636869072277%
Target File= HIV-1_SF1_1000_mono_-1.ct						Target File= HIV-1_SF1_1000_di_-1.ct						Target File= HIV-1_SF1_10000_mono_-1.ct						Target File= HIV-1_SF1_10000_di_-1.ct						Target File= HIV-1_SF1_10000_mono_-1.ct						Target File= HIV-1_SF1_10000_di_-1.ct
Number of nucleotides paired: 1422						Number of nucleotides paired: 1050						Number of nucleotides paired: 1420						Number of nucleotides paired: 1060						Number of nucleotides paired: 1420						Number of nucleotides paired: 1060
Number of nucleotides unpaired: 7751						Number of nucleotides unpaired: 8123						Number of nucleotides unpaired: 7753						Number of nucleotides unpaired: 8113						Number of nucleotides unpaired: 7753						Number of nucleotides unpaired: 8113
Percent of nucleotides paired: 15.502016788400741%						Percent of nucleotides paired: 11.446636869072277%						Percent of nucleotides paired: 15.480213670554889%						Percent of nucleotides paired: 11.555652458301537%						Percent of nucleotides paired: 15.480213670554889%						Percent of nucleotides paired: 11.555652458301537%
Comparison of reference file to target file:						Comparison of reference file to target file:						Comparison of reference file to target file:						Comparison of reference file to target file:						Comparison of reference file to target file:						Comparison of reference file to target file:
Reference File= HIV-1_SF1_100_mono_-1.ct						Reference File= HIV-1_SF1_100_di_-1.ct						Reference File= HIV-1_SF1_100_mono_-1.ct						Reference File= HIV-1_SF1_100_di_-1.ct						Reference File= HIV-1_SF1_1000_mono_-1.ct						Reference File= HIV-1_SF1_1000_di_-1.ct
Target File= HIV-1_SF1_1000_mono_-1.ct						Target File= HIV-1_SF1_1000_di_-1.ct						Target File= HIV-1_SF1_10000_mono_-1.ct						Target File= HIV-1_SF1_10000_di_-1.ct						Target File= HIV-1_SF1_10000_mono_-1.ct						Target File= HIV-1_SF1_10000_di_-1.ct
Number of consistent nts/pairings: 9133						Number of consistent nts/pairings: 9157						Number of consistent nts/pairings: 9135						Number of consistent nts/pairings: 9143						Number of consistent nts/pairings: 9171						Number of consistent nts/pairings: 9155
Number of conflicting nts/pairings: 40						Number of conflicting nts/pairings: 16						Number of conflicting nts/pairings: 38						Number of conflicting nts/pairings: 30						Number of conflicting nts/pairings: 2						Number of conflicting nts/pairings: 18
Percent consistency between files: 99.56%						Percent consistency between files: 99.83%						Percent consistency between files: 99.59%						Percent consistency between files: 99.67%						Percent consistency between files: 99.98%						Percent consistency between files: 99.80%
Conflicting BPs between the Reference and Target file						Conflicting BPs between the Reference and Target file						Conflicting BPs between the Reference and Target file						Conflicting BPs between the Reference and Target file						Conflicting BPs between the Reference and Target file						Conflicting BPs between the Reference and Target file
Position	reference(i)	reference(j)	target(i)	target(j)		Position	reference(i)	reference(j)	target(i)	target(j)		Position	reference(i)	reference(j)	target(i)	target(j)		Position	reference(i)	reference(j)	target(i)	target(j)		Position	reference(i)	reference(j)	target(i)	target(j)		Position	reference(i)	reference(j)	target(i)	target(j)
1201	1201	0	1201	1301		2779	2779	0	2779	2804		1201	1201	0	1201	1301		1057	1057	0	1057	1071		5042	5042	5074	5042	0		1057	1057	0	1057	1071
1206	1206	0	1206	1294		2804	2804	0	2804	2779		1206	1206	0	1206	1294		1058	1058	0	1058	1070		5074	5074	5042	5074	0		1058	1058	0	1058	1070
1294	1294	0	1294	1206		4960	4960	4980	4960	0		1294	1294	0	1294	1206		1060	1060	0	1060	1068								1060	1060	0	1060	1068
1301	1301	0	1301	1201		4961	4961	4979	4961	0		1301	1301	0	1301	1201		1061	1061	0	1061	1067								1061	1061	0	1061	1067
2330	2330	0	2330	2366		4962	4962	4978	4962	0		2330	2330	0	2330	2366		1067	1067	0	1067	1061								1067	1067	0	1067	1061
2331	2331	0	2331	2365		4963	4963	4977	4963	0		2331	2331	0	2331	2365		1068	1068	0	1068	1060								1068	1068	0	1068	1060
2365	2365	0	2365	2331		4964	4964	4976	4964	0		2365	2365	0	2365	2331		1070	1070	0	1070	1058								1070	1070	0	1070	1058
2366	2366	0	2366	2330		4965	4965	4975	4965	0		2366	2366	0	2366	2330		1071	1071	0	1071	1057								1071	1071	0	1071	1057
5042	5042	0	5042	5074		4975	4975	4965	4975	0		5147	5147	5215	5147	0		2779	2779	0	2779	2804								4960	4960	0	4960	4980
5074	5074	0	5074	5042		4976	4976	4964	4976	0		5215	5215	5147	5215	0		2804	2804	0	2804	2779								4980	4980	0	4980	4960
5147	5147	5215	5147	0		4977	4977	4963	4977	0		6306	6306	6334	6306	0		4961	4961	4979	4961	0								5912	5912	6025	5912	0
5215	5215	5147	5215	0		4978	4978	4962	4978	0		6334	6334	6306	6334	0		4962	4962	4978	4962	0								5913	5913	6024	5913	0
6306	6306	6334	6306	0		4979	4979	4961	4979	0		6983	6983	7079	6983	0		4963	4963	4977	4963	0								6024	6024	5913	6024	0
6334	6334	6306	6334	0		4980	4980	4960	4980	0		7079	7079	6983	7079	0		4964	4964	4976	4964	0								6025	6025	5912	6025	0
6983	6983	7079	6983	0		6863	6863	0	6863	6973		7514	7514	7528	7514	0		4965	4965	4975	4965	0								6198	6198	0	6198	6257
7079	7079	6983	7079	0		6973	6973	0	6973	6863		7528	7528	7514	7528	0		4975	4975	4965	4975	0								6201	6201	0	6201	6254
7514	7514	7528	7514	0								8456	8456	8504	8456	0		4976	4976	4964	4976	0								6254	6254	0	6254	6201
7528	7528	7514	7528	0								8504	8504	8456	8504	0		4977	4977	4963	4977	0								6257	6257	0	6257	6198
8456	8456	8504	8456	0								8549	8549	8585	8549	0		4978	4978	4962	4978	0
8504	8504	8456	8504	0								8550	8550	8584	8550	0		4979	4979	4961	4979	0
8549	8549	8585	8549	0								8551	8551	8583	8551	0		5912	5912	6025	5912	0
8550	8550	8584	8550	0								8553	8553	8581	8553	0		5913	5913	6024	5913	0
8551	8551	8583	8551	0								8581	8581	8553	8581	0		6024	6024	5913	6024	0
8553	8553	8581	8553	0								8583	8583	8551	8583	0		6025	6025	5912	6025	0
8581	8581	8553	8581	0								8584	8584	8550	8584	0		6198	6198	0	6198	6257
8583	8583	8551	8583	0								8585	8585	8549	8585	0		6201	6201	0	6201	6254
8584	8584	8550	8584	0								8652	8652	8662	8652	8694		6254	6254	0	6254	6201
8585	8585	8549	8585	0								8653	8653	8661	8653	8693		6257	6257	0	6257	6198
8652	8652	8662	8652	8694								8654	8654	8660	8654	8692		6863	6863	0	6863	6973
8653	8653	8661	8653	8693								8660	8660	8654	8660	8687		6973	6973	0	6973	6863
8654	8654	8660	8654	8692								8661	8661	8653	8661	0
8660	8660	8654	8660	8687								8662	8662	8652	8662	0
8661	8661	8653	8661	0								8687	8687	0	8687	8660
8662	8662	8652	8662	0								8692	8692	0	8692	8654
8687	8687	0	8687	8660								8693	8693	0	8693	8653
8692	8692	0	8692	8654								8694	8694	0	8694	8652
8693	8693	0	8693	8653								8857	8857	8973	8857	0
8694	8694	0	8694	8652								8973	8973	8857	8973	0
8857	8857	8973	8857	0
8973	8973	8857	8973	0

## Sheet: HIV SF1 NoFilter CT Compare
Reference File= HIV-1_SF1_100_mono_NoFilter.ct						Reference File= HIV-1_SF1_100_di_NoFilter.ct						Reference File= HIV-1_SF1_100_mono_NoFilter.ct						Reference File= HIV-1_SF1_100_di_NoFilter.ct						Reference File= HIV-1_SF1_1000_mono_NoFilter.ct						Reference File= HIV-1_SF1_1000_di_NoFilter.ct
Number of nucleotides paired: 3176						Number of nucleotides paired: 3136						Number of nucleotides paired: 3176						Number of nucleotides paired: 3136						Number of nucleotides paired: 3186						Number of nucleotides paired: 3106
Number of nucleotides unpaired: 5997						Number of nucleotides unpaired: 6037						Number of nucleotides unpaired: 5997						Number of nucleotides unpaired: 6037						Number of nucleotides unpaired: 5987						Number of nucleotides unpaired: 6067
Percent of nucleotides paired: 34.62335113921291%						Percent of nucleotides paired: 34.187288782295866%						Percent of nucleotides paired: 34.62335113921291%						Percent of nucleotides paired: 34.187288782295866%						Percent of nucleotides paired: 34.732366728442166%						Percent of nucleotides paired: 33.86024201460809%
Target File= HIV-1_SF1_1000_mono_NoFilter.ct						Target File= HIV-1_SF1_1000_di_NoFilter.ct						Target File= HIV-1_SF1_10000_mono_NoFilter.ct						Target File= HIV-1_SF1_10000_di_NoFilter.ct						Target File= HIV-1_SF1_10000_mono_NoFilter.ct						Target File= HIV-1_SF1_10000_di_NoFilter.ct
Number of nucleotides paired: 3186						Number of nucleotides paired: 3106						Number of nucleotides paired: 3192						Number of nucleotides paired: 3120						Number of nucleotides paired: 3192						Number of nucleotides paired: 3120
Number of nucleotides unpaired: 5987						Number of nucleotides unpaired: 6067						Number of nucleotides unpaired: 5981						Number of nucleotides unpaired: 6053						Number of nucleotides unpaired: 5981						Number of nucleotides unpaired: 6053
Percent of nucleotides paired: 34.732366728442166%						Percent of nucleotides paired: 33.86024201460809%						Percent of nucleotides paired: 34.79777608197972%						Percent of nucleotides paired: 34.012863839529054%						Percent of nucleotides paired: 34.79777608197972%						Percent of nucleotides paired: 34.012863839529054%
Comparison of reference file to target file:						Comparison of reference file to target file:						Comparison of reference file to target file:						Comparison of reference file to target file:						Comparison of reference file to target file:						Comparison of reference file to target file:
Reference File= HIV-1_SF1_100_mono_NoFilter.ct						Reference File= HIV-1_SF1_100_di_NoFilter.ct						Reference File= HIV-1_SF1_100_mono_NoFilter.ct						Reference File= HIV-1_SF1_100_di_NoFilter.ct						Reference File= HIV-1_SF1_1000_mono_NoFilter.ct						Reference File= HIV-1_SF1_1000_di_NoFilter.ct
Target File= HIV-1_SF1_1000_mono_NoFilter.ct						Target File= HIV-1_SF1_1000_di_NoFilter.ct						Target File= HIV-1_SF1_10000_mono_NoFilter.ct						Target File= HIV-1_SF1_10000_di_NoFilter.ct						Target File= HIV-1_SF1_10000_mono_NoFilter.ct						Target File= HIV-1_SF1_10000_di_NoFilter.ct
Number of consistent nts/pairings: 9046						Number of consistent nts/pairings: 8977						Number of consistent nts/pairings: 9043						Number of consistent nts/pairings: 8977						Number of consistent nts/pairings: 9143						Number of consistent nts/pairings: 9096
Number of conflicting nts/pairings: 127						Number of conflicting nts/pairings: 196						Number of conflicting nts/pairings: 130						Number of conflicting nts/pairings: 196						Number of conflicting nts/pairings: 30						Number of conflicting nts/pairings: 77
Percent consistency between files: 98.62%						Percent consistency between files: 97.86%						Percent consistency between files: 98.58%						Percent consistency between files: 97.86%						Percent consistency between files: 99.67%						Percent consistency between files: 99.16%
Conflicting BPs between the Reference and Target file						Conflicting BPs between the Reference and Target file						Conflicting BPs between the Reference and Target file						Conflicting BPs between the Reference and Target file						Conflicting BPs between the Reference and Target file						Conflicting BPs between the Reference and Target file
Position	reference(i)	reference(j)	target(i)	target(j)		Position	reference(i)	reference(j)	target(i)	target(j)		Position	reference(i)	reference(j)	target(i)	target(j)		Position	reference(i)	reference(j)	target(i)	target(j)		Position	reference(i)	reference(j)	target(i)	target(j)		Position	reference(i)	reference(j)	target(i)	target(j)
428	428	0	428	436		746	746	753	746	0		428	428	0	428	436		189	189	196	189	0		505	505	0	505	516		189	189	196	189	0
436	436	0	436	428		747	747	752	747	0		436	436	0	436	428		196	196	189	196	0		516	516	0	516	505		196	196	189	196	0
447	447	0	447	457		752	752	747	752	781		447	447	0	447	457		746	746	753	746	0		2867	2867	0	2867	2876		1427	1427	0	1427	1454
448	448	0	448	456		753	753	746	753	780		448	448	0	448	456		747	747	752	747	0		2876	2876	0	2876	2867		1454	1454	0	1454	1427
456	456	0	456	448		780	780	0	780	753		456	456	0	456	448		752	752	747	752	781		3004	3004	0	3004	3101		2266	2266	2314	2266	0
457	457	0	457	447		781	781	0	781	752		457	457	0	457	447		753	753	746	753	780		3101	3101	0	3101	3004		2314	2314	2266	2314	0
810	810	0	810	843		1427	1427	1454	1427	0		505	505	0	505	516		780	780	0	780	753		3464	3464	3543	3464	0		2571	2571	0	2571	2580
843	843	0	843	810		1454	1454	1427	1454	0		516	516	0	516	505		781	781	0	781	752		3529	3529	0	3529	3540		2580	2580	0	2580	2571
857	857	934	857	0		1929	1929	1952	1929	0		810	810	0	810	843		1929	1929	1952	1929	0		3530	3530	0	3530	3539		4115	4115	4143	4115	0
860	860	974	860	0		1952	1952	1929	1952	0		843	843	0	843	810		1952	1952	1929	1952	0		3531	3531	0	3531	3538		4143	4143	4115	4143	0
914	914	0	914	936		1989	1989	1998	1989	0		857	857	934	857	0		1989	1989	1998	1989	0		3538	3538	0	3538	3531		4442	4442	0	4442	4535
915	915	0	915	935		1990	1990	1997	1990	0		860	860	974	860	0		1990	1990	1997	1990	0		3539	3539	0	3539	3530		4452	4452	0	4452	4524
916	916	0	916	934		1991	1991	1996	1991	0		914	914	0	914	936		1991	1991	1996	1991	0		3540	3540	0	3540	3529		4524	4524	0	4524	4452
917	917	0	917	933		1996	1996	1991	1996	0		915	915	0	915	935		1996	1996	1991	1996	0		3543	3543	3464	3543	0		4535	4535	0	4535	4442
933	933	0	933	917		1997	1997	1990	1997	0		916	916	0	916	934		1997	1997	1990	1997	0		4321	4321	4367	4321	4344		5613	5613	5696	5613	0
934	934	857	934	916		1998	1998	1989	1998	0		917	917	0	917	933		1998	1998	1989	1998	0		4322	4322	4366	4322	4343		5696	5696	5613	5696	0
935	935	0	935	915		2131	2131	2196	2131	0		933	933	0	933	917		2131	2131	2196	2131	0		4343	4343	0	4343	4322		5904	5904	0	5904	5913
936	936	0	936	914		2196	2196	2131	2196	0		934	934	857	934	916		2196	2196	2131	2196	0		4344	4344	0	4344	4321		5905	5905	0	5905	5912
974	974	860	974	0		2266	2266	0	2266	2314		935	935	0	935	915		2571	2571	0	2571	2580		4366	4366	4322	4366	0		5912	5912	6025	5912	5905
1201	1201	0	1201	1301		2314	2314	0	2314	2266		936	936	0	936	914		2580	2580	0	2580	2571		4367	4367	4321	4367	0		5913	5913	6024	5913	5904
1206	1206	0	1206	1294		2779	2779	0	2779	2804		974	974	860	974	0		2779	2779	0	2779	2804		5042	5042	5074	5042	0		6024	6024	5913	6024	0
1294	1294	0	1294	1206		2804	2804	0	2804	2779		1201	1201	0	1201	1301		2804	2804	0	2804	2779		5074	5074	5042	5074	0		6025	6025	5912	6025	0
1301	1301	0	1301	1201		2915	2915	2940	2915	0		1206	1206	0	1206	1294		2915	2915	2940	2915	0		6786	6786	6888	6786	0		6045	6045	6148	6045	0
2395	2395	2412	2395	0		2940	2940	2915	2940	0		1294	1294	0	1294	1206		2940	2940	2915	2940	0		6840	6840	6868	6840	0		6148	6148	6045	6148	0
2412	2412	2395	2412	0		3370	3370	3396	3370	0		1301	1301	0	1301	1201		3370	3370	3396	3370	0		6853	6853	0	6853	6858		6198	6198	0	6198	6257
2572	2572	2579	2572	0		3371	3371	3395	3371	0		2395	2395	2412	2395	0		3371	3371	3395	3371	0		6858	6858	0	6858	6853		6201	6201	0	6201	6254
2579	2579	2572	2579	0		3372	3372	3394	3372	0		2412	2412	2395	2412	0		3372	3372	3394	3372	0		6868	6868	6840	6868	6888		6254	6254	6304	6254	6201
2867	2867	2876	2867	0		3373	3373	3393	3373	0		2572	2572	2579	2572	0		3373	3373	3393	3373	0		6888	6888	6786	6888	6868		6257	6257	6301	6257	6198
2876	2876	2867	2876	0		3380	3380	0	3380	3474		2579	2579	2572	2579	0		3380	3380	0	3380	3474		8551	8551	8583	8551	0		6301	6301	6257	6301	0
2972	2972	3038	2972	0		3393	3393	3373	3393	0		2972	2972	3038	2972	0		3393	3393	3373	3393	0		8583	8583	8551	8583	0		6304	6304	6254	6304	0
3038	3038	2972	3038	0		3394	3394	3372	3394	0		3004	3004	0	3004	3101		3394	3394	3372	3394	0								6347	6347	0	6347	6362
3373	3373	3393	3373	0		3395	3395	3371	3395	0		3038	3038	2972	3038	0		3395	3395	3371	3395	0								6348	6348	0	6348	6361
3393	3393	3373	3393	0		3396	3396	3370	3396	0		3101	3101	0	3101	3004		3396	3396	3370	3396	0								6361	6361	0	6361	6348
3401	3401	0	3401	3415		3469	3469	3531	3469	0		3373	3373	3393	3373	0		3469	3469	3531	3469	0								6362	6362	0	6362	6347
3415	3415	0	3415	3401		3470	3470	3530	3470	0		3393	3393	3373	3393	0		3470	3470	3530	3470	0								6600	6600	0	6600	6618
3458	3458	3468	3458	0		3474	3474	0	3474	3380		3401	3401	0	3401	3415		3474	3474	0	3474	3380								6618	6618	0	6618	6600
3464	3464	0	3464	3543		3519	3519	3526	3519	0		3415	3415	0	3415	3401		3519	3519	3526	3519	0								6891	6891	7000	6891	0
3468	3468	3458	3468	0		3522	3522	0	3522	3566		3458	3458	3468	3458	0		3522	3522	0	3522	3566								6892	6892	6999	6892	0
3543	3543	0	3543	3464		3526	3526	3519	3526	3543		3468	3468	3458	3468	0		3526	3526	3519	3526	3543								6955	6955	0	6955	7049
4004	4004	4058	4004	0		3527	3527	0	3527	3542		3529	3529	0	3529	3540		3527	3527	0	3527	3542								6999	6999	6892	6999	0
4005	4005	4057	4005	0		3528	3528	0	3528	3541		3530	3530	0	3530	3539		3528	3528	0	3528	3541								7000	7000	6891	7000	0
4057	4057	4005	4057	0		3529	3529	0	3529	3540		3531	3531	0	3531	3538		3529	3529	0	3529	3540								7049	7049	0	7049	6955
4058	4058	4004	4058	0		3530	3530	3470	3530	3539		3538	3538	0	3538	3531		3530	3530	3470	3530	3539								7607	7607	0	7607	7664
4321	4321	4343	4321	4367		3531	3531	3469	3531	3538		3539	3539	0	3539	3530		3531	3531	3469	3531	3538								7664	7664	0	7664	7607
4322	4322	4342	4322	4366		3538	3538	0	3538	3531		3540	3540	0	3540	3529		3538	3538	0	3538	3531								8198	8198	0	8198	8255
4342	4342	4322	4342	0		3539	3539	0	3539	3530		4004	4004	4058	4004	0		3539	3539	0	3539	3530								8250	8250	8255	8250	0
4343	4343	4321	4343	0		3540	3540	0	3540	3529		4005	4005	4057	4005	0		3540	3540	0	3540	3529								8255	8255	8250	8255	8198
4366	4366	0	4366	4322		3541	3541	0	3541	3528		4057	4057	4005	4057	0		3541	3541	0	3541	3528								8267	8267	0	8267	8382
4367	4367	0	4367	4321		3542	3542	0	3542	3527		4058	4058	4004	4058	0		3542	3542	0	3542	3527								8268	8268	0	8268	8381
5042	5042	0	5042	5074		3543	3543	0	3543	3526		4321	4321	4343	4321	4344		3543	3543	0	3543	3526								8270	8270	8379	8270	0
5074	5074	0	5074	5042		3566	3566	0	3566	3522		4322	4322	4342	4322	4343		3566	3566	0	3566	3522								8271	8271	8378	8271	0
5147	5147	5215	5147	0		3573	3573	3601	3573	0		4342	4342	4322	4342	0		3573	3573	3601	3573	0								8272	8272	8377	8272	0
5215	5215	5147	5215	0		3587	3587	0	3587	3645		4343	4343	4321	4343	4322		3587	3587	0	3587	3645								8273	8273	8376	8273	0
5918	5918	0	5918	5927		3601	3601	3573	3601	0		4344	4344	0	4344	4321		3601	3601	3573	3601	0								8305	8305	0	8305	8404
5927	5927	0	5927	5918		3613	3613	3727	3613	0		5147	5147	5215	5147	0		3613	3613	3727	3613	0								8373	8373	0	8373	8414
6306	6306	6334	6306	0		3614	3614	3726	3614	0		5215	5215	5147	5215	0		3614	3614	3726	3614	0								8376	8376	8273	8376	8411
6334	6334	6306	6334	0		3645	3645	0	3645	3587		5918	5918	0	5918	5927		3645	3645	0	3645	3587								8377	8377	8272	8377	8410
6691	6691	0	6691	6783		3726	3726	3614	3726	0		5927	5927	0	5927	5918		3726	3726	3614	3726	0								8378	8378	8271	8378	8409
6704	6704	0	6704	6767		3727	3727	3613	3727	0		6306	6306	6334	6306	0		3727	3727	3613	3727	0								8379	8379	8270	8379	8408
6760	6760	6806	6760	0		4115	4115	0	4115	4143		6334	6334	6306	6334	0		4222	4222	4232	4222	0								8381	8381	0	8381	8268
6767	6767	0	6767	6704		4143	4143	0	4143	4115		6691	6691	0	6691	6783		4232	4232	4222	4232	0								8382	8382	0	8382	8267
6770	6770	6783	6770	0		4222	4222	4232	4222	0		6704	6704	0	6704	6767		4282	4282	0	4282	4378								8383	8383	0	8383	8405
6779	6779	0	6779	6896		4232	4232	4222	4232	0		6760	6760	6806	6760	0		4378	4378	0	4378	4282								8404	8404	0	8404	8305
6783	6783	6770	6783	6691		4282	4282	0	4282	4378		6767	6767	0	6767	6704		4440	4440	4537	4440	0								8405	8405	0	8405	8383
6785	6785	0	6785	6889		4378	4378	0	4378	4282		6770	6770	6783	6770	0		4441	4441	4536	4441	0								8408	8408	0	8408	8379
6786	6786	0	6786	6888		4440	4440	4537	4440	0		6779	6779	0	6779	6896		4444	4444	4533	4444	0								8409	8409	0	8409	8378
6787	6787	0	6787	6887		4441	4441	4536	4441	0		6783	6783	6770	6783	6691		4445	4445	4532	4445	0								8410	8410	0	8410	8377
6788	6788	0	6788	6886		4442	4442	4535	4442	0		6785	6785	0	6785	6889		4532	4532	4445	4532	0								8411	8411	0	8411	8376
6789	6789	0	6789	6885		4444	4444	4533	4444	0		6787	6787	0	6787	6887		4533	4533	4444	4533	0								8414	8414	0	8414	8373
6790	6790	0	6790	6884		4445	4445	4532	4445	0		6788	6788	0	6788	6886		4536	4536	4441	4536	0								8441	8441	0	8441	8551
6792	6792	0	6792	6882		4452	4452	4524	4452	0		6789	6789	0	6789	6885		4537	4537	4440	4537	0								8442	8442	0	8442	8550
6806	6806	6760	6806	0		4524	4524	4452	4524	0		6790	6790	0	6790	6884		5395	5395	5428	5395	5424								8519	8519	8555	8519	0
6832	6832	0	6832	6875		4532	4532	4445	4532	0		6792	6792	0	6792	6882		5397	5397	5426	5397	5422								8550	8550	0	8550	8442
6836	6836	0	6836	6871		4533	4533	4444	4533	0		6806	6806	6760	6806	0		5398	5398	5425	5398	0								8551	8551	0	8551	8441
6840	6840	0	6840	6868		4535	4535	4442	4535	0		6832	6832	0	6832	6875		5422	5422	0	5422	5397								8555	8555	8519	8555	0
6868	6868	6888	6868	6840		4536	4536	4441	4536	0		6836	6836	0	6836	6871		5424	5424	0	5424	5395								8617	8617	8642	8617	0
6869	6869	6887	6869	0		4537	4537	4440	4537	0		6853	6853	0	6853	6858		5425	5425	5398	5425	0								8642	8642	8617	8642	0
6870	6870	6886	6870	0		5395	5395	5428	5395	5424		6858	6858	0	6858	6853		5426	5426	5397	5426	0
6871	6871	6885	6871	6836		5397	5397	5426	5397	5422		6869	6869	6887	6869	0		5428	5428	5395	5428	0
6872	6872	6884	6872	0		5398	5398	5425	5398	0		6870	6870	6886	6870	0		5477	5477	0	5477	5518
6873	6873	6883	6873	0		5422	5422	0	5422	5397		6871	6871	6885	6871	6836		5499	5499	0	5499	5507
6874	6874	6882	6874	0		5424	5424	0	5424	5395		6872	6872	6884	6872	0		5500	5500	0	5500	5506
6875	6875	6881	6875	6832		5425	5425	5398	5425	0		6873	6873	6883	6873	0		5501	5501	0	5501	5505
6881	6881	6875	6881	0		5426	5426	5397	5426	0		6874	6874	6882	6874	0		5505	5505	0	5505	5501
6882	6882	6874	6882	6792		5428	5428	5395	5428	0		6875	6875	6881	6875	6832		5506	5506	0	5506	5500
6883	6883	6873	6883	0		5477	5477	0	5477	5518		6881	6881	6875	6881	0		5507	5507	0	5507	5499
6884	6884	6872	6884	6790		5499	5499	0	5499	5507		6882	6882	6874	6882	6792		5518	5518	0	5518	5477
6885	6885	6871	6885	6789		5500	5500	0	5500	5506		6883	6883	6873	6883	0		5579	5579	5696	5579	0
6886	6886	6870	6886	6788		5501	5501	0	5501	5505		6884	6884	6872	6884	6790		5623	5623	5636	5623	0
6887	6887	6869	6887	6787		5505	5505	0	5505	5501		6885	6885	6871	6885	6789		5636	5636	5623	5636	0
6888	6888	6868	6888	6786		5506	5506	0	5506	5500		6886	6886	6870	6886	6788		5674	5674	0	5674	5737
6889	6889	0	6889	6785		5507	5507	0	5507	5499		6887	6887	6869	6887	6787		5676	5676	0	5676	5735
6896	6896	0	6896	6779		5518	5518	0	5518	5477		6889	6889	0	6889	6785		5677	5677	0	5677	5734
6983	6983	7079	6983	0		5579	5579	5696	5579	0		6896	6896	0	6896	6779		5680	5680	0	5680	5729
7079	7079	6983	7079	7099		5613	5613	0	5613	5696		6983	6983	7079	6983	0		5683	5683	5755	5683	5726
7099	7099	0	7099	7079		5623	5623	5636	5623	0		7079	7079	6983	7079	7099		5684	5684	5754	5684	5725
7253	7253	0	7253	7275		5636	5636	5623	5636	0		7099	7099	0	7099	7079		5696	5696	5579	5696	0
7275	7275	0	7275	7253		5674	5674	0	5674	5737		7253	7253	0	7253	7275		5725	5725	0	5725	5684
7514	7514	7528	7514	0		5676	5676	0	5676	5735		7275	7275	0	7275	7253		5726	5726	0	5726	5683
7528	7528	7514	7528	0		5677	5677	0	5677	5734		7514	7514	7528	7514	0		5729	5729	0	5729	5680
7668	7668	0	7668	7775		5680	5680	0	5680	5729		7528	7528	7514	7528	0		5734	5734	0	5734	5677
7766	7766	7785	7766	0		5683	5683	5755	5683	5726		7668	7668	0	7668	7775		5735	5735	0	5735	5676
7767	7767	7784	7767	0		5684	5684	5754	5684	5725		7766	7766	7785	7766	0		5737	5737	0	5737	5674
7775	7775	0	7775	7668		5696	5696	5579	5696	5613		7767	7767	7784	7767	0		5754	5754	5684	5754	0
7784	7784	7767	7784	0		5725	5725	0	5725	5684		7775	7775	0	7775	7668		5755	5755	5683	5755	0
7785	7785	7766	7785	0		5726	5726	0	5726	5683		7784	7784	7767	7784	0		5762	5762	5865	5762	5857
7794	7794	0	7794	7874		5729	5729	0	5729	5680		7785	7785	7766	7785	0		5767	5767	5839	5767	0
7874	7874	0	7874	7794		5734	5734	0	5734	5677		7794	7794	0	7794	7874		5768	5768	5838	5768	0
7981	7981	0	7981	8053		5735	5735	0	5735	5676		7874	7874	0	7874	7794		5769	5769	5837	5769	0
8053	8053	0	8053	7981		5737	5737	0	5737	5674		7981	7981	0	7981	8053		5837	5837	5769	5837	5845
8456	8456	8504	8456	0		5754	5754	5684	5754	0		8053	8053	0	8053	7981		5838	5838	5768	5838	0
8504	8504	8456	8504	0		5755	5755	5683	5755	0		8456	8456	8504	8456	0		5839	5839	5767	5839	0
8525	8525	0	8525	8549		5762	5762	5865	5762	5857		8504	8504	8456	8504	0		5845	5845	0	5845	5837
8549	8549	8585	8549	8525		5767	5767	5839	5767	0		8525	8525	0	8525	8549		5857	5857	0	5857	5762
8550	8550	8584	8550	0		5768	5768	5838	5768	0		8549	8549	8585	8549	8525		5865	5865	5762	5865	0
8584	8584	8550	8584	0		5769	5769	5837	5769	0		8550	8550	8584	8550	0		5904	5904	0	5904	5913
8585	8585	8549	8585	0		5837	5837	5769	5837	5845		8551	8551	8583	8551	0		5905	5905	0	5905	5912
8652	8652	8662	8652	8694		5838	5838	5768	5838	0		8583	8583	8551	8583	0		5912	5912	6025	5912	5905
8653	8653	8661	8653	8693		5839	5839	5767	5839	0		8584	8584	8550	8584	0		5913	5913	6024	5913	5904
8654	8654	8660	8654	8692		5845	5845	0	5845	5837		8585	8585	8549	8585	0		5929	5929	6008	5929	0
8660	8660	8654	8660	8687		5857	5857	0	5857	5762		8652	8652	8662	8652	8694		6008	6008	5929	6008	0
8661	8661	8653	8661	0		5865	5865	5762	5865	0		8653	8653	8661	8653	8693		6024	6024	5913	6024	0
8662	8662	8652	8662	0		5929	5929	6008	5929	0		8654	8654	8660	8654	8692		6025	6025	5912	6025	0
8687	8687	0	8687	8660		6008	6008	5929	6008	0		8660	8660	8654	8660	8687		6198	6198	0	6198	6257
8692	8692	0	8692	8654		6045	6045	0	6045	6148		8661	8661	8653	8661	0		6201	6201	0	6201	6254
8693	8693	0	8693	8653		6148	6148	0	6148	6045		8662	8662	8652	8662	0		6254	6254	6304	6254	6201
8694	8694	0	8694	8652		6347	6347	6362	6347	0		8687	8687	0	8687	8660		6257	6257	6301	6257	6198
						6348	6348	6361	6348	0		8692	8692	0	8692	8654		6301	6301	6257	6301	0
						6361	6361	6348	6361	0		8693	8693	0	8693	8653		6304	6304	6254	6304	0
						6362	6362	6347	6362	0		8694	8694	0	8694	8652		6604	6604	6614	6604	0
						6600	6600	6618	6600	0								6614	6614	6604	6614	0
						6604	6604	6614	6604	0								6853	6853	6858	6853	0
						6614	6614	6604	6614	0								6858	6858	6853	6858	0
						6618	6618	6600	6618	0								6870	6870	6905	6870	0
						6853	6853	6858	6853	0								6905	6905	6870	6905	0
						6858	6858	6853	6858	0								6923	6923	7040	6923	0
						6870	6870	6905	6870	0								6924	6924	7039	6924	0
						6891	6891	0	6891	7000								7039	7039	6924	7039	0
						6892	6892	0	6892	6999								7040	7040	6923	7040	0
						6905	6905	6870	6905	0								7064	7064	0	7064	7115
						6923	6923	7040	6923	0								7115	7115	0	7115	7064
						6924	6924	7039	6924	0								7150	7150	7170	7150	0
						6955	6955	7049	6955	0								7160	7160	0	7160	7272
						6999	6999	0	6999	6892								7162	7162	0	7162	7270
						7000	7000	0	7000	6891								7170	7170	7150	7170	7259
						7039	7039	6924	7039	0								7259	7259	0	7259	7170
						7040	7040	6923	7040	0								7270	7270	0	7270	7162
						7049	7049	6955	7049	0								7272	7272	0	7272	7160
						7064	7064	0	7064	7115								7507	7507	7531	7507	0
						7115	7115	0	7115	7064								7519	7519	7524	7519	0
						7150	7150	7170	7150	0								7524	7524	7519	7524	0
						7160	7160	0	7160	7272								7531	7531	7507	7531	0
						7162	7162	0	7162	7270								7595	7595	7604	7595	0
						7170	7170	7150	7170	7259								7604	7604	7595	7604	0
						7259	7259	0	7259	7170								7615	7615	7716	7615	0
						7270	7270	0	7270	7162								7616	7616	7715	7616	0
						7272	7272	0	7272	7160								7715	7715	7616	7715	0
						7507	7507	7531	7507	0								7716	7716	7615	7716	0
						7519	7519	7524	7519	0								7765	7765	0	7765	7786
						7524	7524	7519	7524	0								7766	7766	0	7766	7785
						7531	7531	7507	7531	0								7767	7767	0	7767	7784
						7595	7595	7604	7595	0								7784	7784	0	7784	7767
						7604	7604	7595	7604	0								7785	7785	0	7785	7766
						7607	7607	7664	7607	0								7786	7786	0	7786	7765
						7615	7615	7716	7615	0								8100	8100	8216	8100	0
						7616	7616	7715	7616	0								8216	8216	8100	8216	0
						7664	7664	7607	7664	0								8248	8248	0	8248	8257
						7715	7715	7616	7715	0								8249	8249	0	8249	8256
						7716	7716	7615	7716	0								8256	8256	0	8256	8249
						7765	7765	0	7765	7786								8257	8257	0	8257	8248
						7766	7766	0	7766	7785								8270	8270	8379	8270	0
						7767	7767	0	7767	7784								8271	8271	8378	8271	0
						7784	7784	0	7784	7767								8272	8272	8377	8272	0
						7785	7785	0	7785	7766								8273	8273	8376	8273	0
						7786	7786	0	7786	7765								8305	8305	0	8305	8404
						8100	8100	8216	8100	0								8373	8373	0	8373	8414
						8198	8198	8255	8198	0								8376	8376	8273	8376	8411
						8216	8216	8100	8216	0								8377	8377	8272	8377	8410
						8248	8248	0	8248	8257								8378	8378	8271	8378	8409
						8249	8249	0	8249	8256								8379	8379	8270	8379	8408
						8250	8250	0	8250	8255								8404	8404	0	8404	8305
						8255	8255	8198	8255	8250								8408	8408	0	8408	8379
						8256	8256	0	8256	8249								8409	8409	0	8409	8378
						8257	8257	0	8257	8248								8410	8410	0	8410	8377
						8267	8267	8382	8267	0								8411	8411	0	8411	8376
						8268	8268	8381	8268	0								8414	8414	0	8414	8373
						8381	8381	8268	8381	0								8441	8441	0	8441	8551
						8382	8382	8267	8382	0								8442	8442	0	8442	8550
						8383	8383	8405	8383	0								8502	8502	8565	8502	0
						8405	8405	8383	8405	0								8512	8512	0	8512	8553
						8502	8502	8565	8502	0								8550	8550	0	8550	8442
						8512	8512	0	8512	8553								8551	8551	0	8551	8441
						8519	8519	0	8519	8555								8553	8553	0	8553	8512
						8553	8553	0	8553	8512								8565	8565	8502	8565	0
						8555	8555	0	8555	8519								8617	8617	8642	8617	0
						8565	8565	8502	8565	0								8642	8642	8617	8642	0

## Sheet: HIV SF1 -2 mono-di CT Compare
Reference File= HIV-1_SF1_100_mono_-2.ct						Reference File= HIV-1_SF1_1000_mono_-2.ct						Reference File= HIV-1_SF1_10000_mono_-2.ct						Reference File= HIV-1_SF1_100_mono_-2.ct						Reference File= HIV-1_SF1_1000_mono_-2.ct						Reference File= HIV-1_SF1_100_mono_-2.ct
Number of nucleotides paired: 566						Number of nucleotides paired: 582						Number of nucleotides paired: 582						Number of nucleotides paired: 566						Number of nucleotides paired: 582						Number of nucleotides paired: 566
Number of nucleotides unpaired: 8607						Number of nucleotides unpaired: 8591						Number of nucleotides unpaired: 8591						Number of nucleotides unpaired: 8607						Number of nucleotides unpaired: 8591						Number of nucleotides unpaired: 8607
Percent of nucleotides paired: 6.1702823503761035%						Percent of nucleotides paired: 6.344707293142919%						Percent of nucleotides paired: 6.344707293142919%						Percent of nucleotides paired: 6.1702823503761035%						Percent of nucleotides paired: 6.344707293142919%						Percent of nucleotides paired: 6.1702823503761035%
Target File= HIV-1_SF1_100_di_-2.ct						Target File= HIV-1_SF1_1000_di_-2.ct						Target File= HIV-1_SF1_10000_di_-2.ct						Target File= HIV-1_SF1_1000_di_-2.ct						Target File= HIV-1_SF1_10000_di_-2.ct						Target File= HIV-1_SF1_10000_di_-2.ct
Number of nucleotides paired: 408						Number of nucleotides paired: 410						Number of nucleotides paired: 416						Number of nucleotides paired: 410						Number of nucleotides paired: 416						Number of nucleotides paired: 416
Number of nucleotides unpaired: 8765						Number of nucleotides unpaired: 8763						Number of nucleotides unpaired: 8757						Number of nucleotides unpaired: 8763						Number of nucleotides unpaired: 8757						Number of nucleotides unpaired: 8757
Percent of nucleotides paired: 4.447836040553799%						Percent of nucleotides paired: 4.4696391583996515%						Percent of nucleotides paired: 4.535048511937207%						Percent of nucleotides paired: 4.4696391583996515%						Percent of nucleotides paired: 4.535048511937207%						Percent of nucleotides paired: 4.535048511937207%
Comparison of reference file to target file:						Comparison of reference file to target file:						Comparison of reference file to target file:						Comparison of reference file to target file:						Comparison of reference file to target file:						Comparison of reference file to target file:
Reference File= HIV-1_SF1_100_mono_-2.ct						Reference File= HIV-1_SF1_1000_mono_-2.ct						Reference File= HIV-1_SF1_10000_mono_-2.ct						Reference File= HIV-1_SF1_100_mono_-2.ct						Reference File= HIV-1_SF1_1000_mono_-2.ct						Reference File= HIV-1_SF1_100_mono_-2.ct
Target File= HIV-1_SF1_100_di_-2.ct						Target File= HIV-1_SF1_1000_di_-2.ct						Target File= HIV-1_SF1_10000_di_-2.ct						Target File= HIV-1_SF1_1000_di_-2.ct						Target File= HIV-1_SF1_10000_di_-2.ct						Target File= HIV-1_SF1_10000_di_-2.ct
Number of consistent nts/pairings: 8955						Number of consistent nts/pairings: 8953						Number of consistent nts/pairings: 8951						Number of consistent nts/pairings: 8965						Number of consistent nts/pairings: 8951						Number of consistent nts/pairings: 8963
Number of conflicting nts/pairings: 218						Number of conflicting nts/pairings: 220						Number of conflicting nts/pairings: 222						Number of conflicting nts/pairings: 208						Number of conflicting nts/pairings: 222						Number of conflicting nts/pairings: 210
Percent consistency between files: 97.62%						Percent consistency between files: 97.60%						Percent consistency between files: 97.58%						Percent consistency between files: 97.73%						Percent consistency between files: 97.58%						Percent consistency between files: 97.71%
Conflicting BPs between the Reference and Target file						Conflicting BPs between the Reference and Target file						Conflicting BPs between the Reference and Target file						Conflicting BPs between the Reference and Target file						Conflicting BPs between the Reference and Target file						Conflicting BPs between the Reference and Target file
Position	reference(i)	reference(j)	target(i)	target(j)		Position	reference(i)	reference(j)	target(i)	target(j)		Position	reference(i)	reference(j)	target(i)	target(j)		Position	reference(i)	reference(j)	target(i)	target(j)		Position	reference(i)	reference(j)	target(i)	target(j)		Position	reference(i)	reference(j)	target(i)	target(j)
67	67	0	67	94		67	67	0	67	94		67	67	0	67	94		67	67	0	67	94		67	67	0	67	94		67	67	0	67	94
68	68	0	68	93		68	68	0	68	93		68	68	0	68	93		68	68	0	68	93		68	68	0	68	93		68	68	0	68	93
69	69	0	69	92		69	69	0	69	92		69	69	0	69	92		69	69	0	69	92		69	69	0	69	92		69	69	0	69	92
70	70	0	70	90		70	70	0	70	90		70	70	0	70	90		70	70	0	70	90		70	70	0	70	90		70	70	0	70	90
71	71	0	71	89		71	71	0	71	89		71	71	0	71	89		71	71	0	71	89		71	71	0	71	89		71	71	0	71	89
72	72	0	72	88		72	72	0	72	88		72	72	0	72	88		72	72	0	72	88		72	72	0	72	88		72	72	0	72	88
73	73	0	73	87		73	73	0	73	87		73	73	0	73	87		73	73	0	73	87		73	73	0	73	87		73	73	0	73	87
74	74	0	74	86		74	74	0	74	86		74	74	0	74	86		74	74	0	74	86		74	74	0	74	86		74	74	0	74	86
86	86	0	86	74		86	86	0	86	74		86	86	0	86	74		86	86	0	86	74		86	86	0	86	74		86	86	0	86	74
87	87	0	87	73		87	87	0	87	73		87	87	0	87	73		87	87	0	87	73		87	87	0	87	73		87	87	0	87	73
88	88	0	88	72		88	88	0	88	72		88	88	0	88	72		88	88	0	88	72		88	88	0	88	72		88	88	0	88	72
89	89	0	89	71		89	89	0	89	71		89	89	0	89	71		89	89	0	89	71		89	89	0	89	71		89	89	0	89	71
90	90	0	90	70		90	90	0	90	70		90	90	0	90	70		90	90	0	90	70		90	90	0	90	70		90	90	0	90	70
92	92	0	92	69		92	92	0	92	69		92	92	0	92	69		92	92	0	92	69		92	92	0	92	69		92	92	0	92	69
93	93	0	93	68		93	93	0	93	68		93	93	0	93	68		93	93	0	93	68		93	93	0	93	68		93	93	0	93	68
94	94	0	94	67		94	94	0	94	67		94	94	0	94	67		94	94	0	94	67		94	94	0	94	67		94	94	0	94	67
582	582	657	582	0		582	582	657	582	0		582	582	657	582	0		582	582	657	582	0		582	582	657	582	0		582	582	657	582	0
583	583	656	583	0		583	583	656	583	0		583	583	656	583	0		583	583	656	583	0		583	583	656	583	0		583	583	656	583	0
656	656	583	656	0		656	656	583	656	0		656	656	583	656	0		656	656	583	656	0		656	656	583	656	0		656	656	583	656	0
657	657	582	657	0		657	657	582	657	0		657	657	582	657	0		657	657	582	657	0		657	657	582	657	0		657	657	582	657	0
1074	1074	1102	1074	0		1060	1060	1068	1060	0		1060	1060	1068	1060	0		1074	1074	1102	1074	0		1060	1060	1068	1060	0		1074	1074	1102	1074	0
1075	1075	1101	1075	0		1061	1061	1067	1061	0		1061	1061	1067	1061	0		1075	1075	1101	1075	0		1061	1061	1067	1061	0		1075	1075	1101	1075	0
1076	1076	1100	1076	0		1067	1067	1061	1067	0		1067	1067	1061	1067	0		1076	1076	1100	1076	0		1067	1067	1061	1067	0		1076	1076	1100	1076	0
1077	1077	1099	1077	0		1068	1068	1060	1068	0		1068	1068	1060	1068	0		1077	1077	1099	1077	0		1068	1068	1060	1068	0		1077	1077	1099	1077	0
1078	1078	1098	1078	0		1074	1074	1102	1074	0		1074	1074	1102	1074	0		1078	1078	1098	1078	0		1074	1074	1102	1074	0		1078	1078	1098	1078	0
1080	1080	1097	1080	0		1075	1075	1101	1075	0		1075	1075	1101	1075	0		1080	1080	1097	1080	0		1075	1075	1101	1075	0		1080	1080	1097	1080	0
1081	1081	1096	1081	0		1076	1076	1100	1076	0		1076	1076	1100	1076	0		1081	1081	1096	1081	0		1076	1076	1100	1076	0		1081	1081	1096	1081	0
1082	1082	1095	1082	0		1077	1077	1099	1077	0		1077	1077	1099	1077	0		1082	1082	1095	1082	0		1077	1077	1099	1077	0		1082	1082	1095	1082	0
1083	1083	1094	1083	0		1078	1078	1098	1078	0		1078	1078	1098	1078	0		1083	1083	1094	1083	0		1078	1078	1098	1078	0		1083	1083	1094	1083	0
1084	1084	1093	1084	0		1080	1080	1097	1080	0		1080	1080	1097	1080	0		1084	1084	1093	1084	0		1080	1080	1097	1080	0		1084	1084	1093	1084	0
1093	1093	1084	1093	0		1081	1081	1096	1081	0		1081	1081	1096	1081	0		1093	1093	1084	1093	0		1081	1081	1096	1081	0		1093	1093	1084	1093	0
1094	1094	1083	1094	0		1082	1082	1095	1082	0		1082	1082	1095	1082	0		1094	1094	1083	1094	0		1082	1082	1095	1082	0		1094	1094	1083	1094	0
1095	1095	1082	1095	0		1083	1083	1094	1083	0		1083	1083	1094	1083	0		1095	1095	1082	1095	0		1083	1083	1094	1083	0		1095	1095	1082	1095	0
1096	1096	1081	1096	0		1084	1084	1093	1084	0		1084	1084	1093	1084	0		1096	1096	1081	1096	0		1084	1084	1093	1084	0		1096	1096	1081	1096	0
1097	1097	1080	1097	0		1093	1093	1084	1093	0		1093	1093	1084	1093	0		1097	1097	1080	1097	0		1093	1093	1084	1093	0		1097	1097	1080	1097	0
1098	1098	1078	1098	0		1094	1094	1083	1094	0		1094	1094	1083	1094	0		1098	1098	1078	1098	0		1094	1094	1083	1094	0		1098	1098	1078	1098	0
1099	1099	1077	1099	0		1095	1095	1082	1095	0		1095	1095	1082	1095	0		1099	1099	1077	1099	0		1095	1095	1082	1095	0		1099	1099	1077	1099	0
1100	1100	1076	1100	0		1096	1096	1081	1096	0		1096	1096	1081	1096	0		1100	1100	1076	1100	0		1096	1096	1081	1096	0		1100	1100	1076	1100	0
1101	1101	1075	1101	0		1097	1097	1080	1097	0		1097	1097	1080	1097	0		1101	1101	1075	1101	0		1097	1097	1080	1097	0		1101	1101	1075	1101	0
1102	1102	1074	1102	0		1098	1098	1078	1098	0		1098	1098	1078	1098	0		1102	1102	1074	1102	0		1098	1098	1078	1098	0		1102	1102	1074	1102	0
1103	1103	1141	1103	0		1099	1099	1077	1099	0		1099	1099	1077	1099	0		1103	1103	1141	1103	0		1099	1099	1077	1099	0		1103	1103	1141	1103	0
1104	1104	1140	1104	0		1100	1100	1076	1100	0		1100	1100	1076	1100	0		1104	1104	1140	1104	0		1100	1100	1076	1100	0		1104	1104	1140	1104	0
1105	1105	1139	1105	0		1101	1101	1075	1101	0		1101	1101	1075	1101	0		1105	1105	1139	1105	0		1101	1101	1075	1101	0		1105	1105	1139	1105	0
1106	1106	1138	1106	0		1102	1102	1074	1102	0		1102	1102	1074	1102	0		1106	1106	1138	1106	0		1102	1102	1074	1102	0		1106	1106	1138	1106	0
1110	1110	1137	1110	0		1103	1103	1141	1103	0		1103	1103	1141	1103	0		1110	1110	1137	1110	0		1103	1103	1141	1103	0		1110	1110	1137	1110	0
1111	1111	1136	1111	0		1104	1104	1140	1104	0		1104	1104	1140	1104	0		1111	1111	1136	1111	0		1104	1104	1140	1104	0		1111	1111	1136	1111	0
1112	1112	1135	1112	0		1105	1105	1139	1105	0		1105	1105	1139	1105	0		1112	1112	1135	1112	0		1105	1105	1139	1105	0		1112	1112	1135	1112	0
1116	1116	1132	1116	0		1106	1106	1138	1106	0		1106	1106	1138	1106	0		1116	1116	1132	1116	0		1106	1106	1138	1106	0		1116	1116	1132	1116	0
1117	1117	1131	1117	0		1110	1110	1137	1110	0		1110	1110	1137	1110	0		1117	1117	1131	1117	0		1110	1110	1137	1110	0		1117	1117	1131	1117	0
1118	1118	1130	1118	0		1111	1111	1136	1111	0		1111	1111	1136	1111	0		1118	1118	1130	1118	0		1111	1111	1136	1111	0		1118	1118	1130	1118	0
1119	1119	1129	1119	0		1112	1112	1135	1112	0		1112	1112	1135	1112	0		1119	1119	1129	1119	0		1112	1112	1135	1112	0		1119	1119	1129	1119	0
1120	1120	1128	1120	0		1116	1116	1132	1116	0		1116	1116	1132	1116	0		1120	1120	1128	1120	0		1116	1116	1132	1116	0		1120	1120	1128	1120	0
1121	1121	1127	1121	0		1117	1117	1131	1117	0		1117	1117	1131	1117	0		1121	1121	1127	1121	0		1117	1117	1131	1117	0		1121	1121	1127	1121	0
1127	1127	1121	1127	0		1118	1118	1130	1118	0		1118	1118	1130	1118	0		1127	1127	1121	1127	0		1118	1118	1130	1118	0		1127	1127	1121	1127	0
1128	1128	1120	1128	0		1119	1119	1129	1119	0		1119	1119	1129	1119	0		1128	1128	1120	1128	0		1119	1119	1129	1119	0		1128	1128	1120	1128	0
1129	1129	1119	1129	0		1120	1120	1128	1120	0		1120	1120	1128	1120	0		1129	1129	1119	1129	0		1120	1120	1128	1120	0		1129	1129	1119	1129	0
1130	1130	1118	1130	0		1121	1121	1127	1121	0		1121	1121	1127	1121	0		1130	1130	1118	1130	0		1121	1121	1127	1121	0		1130	1130	1118	1130	0
1131	1131	1117	1131	0		1127	1127	1121	1127	0		1127	1127	1121	1127	0		1131	1131	1117	1131	0		1127	1127	1121	1127	0		1131	1131	1117	1131	0
1132	1132	1116	1132	0		1128	1128	1120	1128	0		1128	1128	1120	1128	0		1132	1132	1116	1132	0		1128	1128	1120	1128	0		1132	1132	1116	1132	0
1135	1135	1112	1135	0		1129	1129	1119	1129	0		1129	1129	1119	1129	0		1135	1135	1112	1135	0		1129	1129	1119	1129	0		1135	1135	1112	1135	0
1136	1136	1111	1136	0		1130	1130	1118	1130	0		1130	1130	1118	1130	0		1136	1136	1111	1136	0		1130	1130	1118	1130	0		1136	1136	1111	1136	0
1137	1137	1110	1137	0		1131	1131	1117	1131	0		1131	1131	1117	1131	0		1137	1137	1110	1137	0		1131	1131	1117	1131	0		1137	1137	1110	1137	0
1138	1138	1106	1138	0		1132	1132	1116	1132	0		1132	1132	1116	1132	0		1138	1138	1106	1138	0		1132	1132	1116	1132	0		1138	1138	1106	1138	0
1139	1139	1105	1139	0		1135	1135	1112	1135	0		1135	1135	1112	1135	0		1139	1139	1105	1139	0		1135	1135	1112	1135	0		1139	1139	1105	1139	0
1140	1140	1104	1140	0		1136	1136	1111	1136	0		1136	1136	1111	1136	0		1140	1140	1104	1140	0		1136	1136	1111	1136	0		1140	1140	1104	1140	0
1141	1141	1103	1141	0		1137	1137	1110	1137	0		1137	1137	1110	1137	0		1141	1141	1103	1141	0		1137	1137	1110	1137	0		1141	1141	1103	1141	0
1200	1200	0	1200	1302		1138	1138	1106	1138	0		1138	1138	1106	1138	0		1200	1200	0	1200	1302		1138	1138	1106	1138	0		1200	1200	0	1200	1302
1201	1201	0	1201	1301		1139	1139	1105	1139	0		1139	1139	1105	1139	0		1201	1201	0	1201	1301		1139	1139	1105	1139	0		1201	1201	0	1201	1301
1205	1205	1295	1205	0		1140	1140	1104	1140	0		1140	1140	1104	1140	0		1205	1205	1295	1205	0		1140	1140	1104	1140	0		1205	1205	1295	1205	0
1295	1295	1205	1295	0		1141	1141	1103	1141	0		1141	1141	1103	1141	0		1295	1295	1205	1295	0		1141	1141	1103	1141	0		1295	1295	1205	1295	0
1301	1301	0	1301	1201		1200	1200	0	1200	1302		1200	1200	0	1200	1302		1301	1301	0	1301	1201		1200	1200	0	1200	1302		1301	1301	0	1301	1201
1302	1302	0	1302	1200		1205	1205	1295	1205	0		1205	1205	1295	1205	0		1302	1302	0	1302	1200		1205	1205	1295	1205	0		1302	1302	0	1302	1200
1553	1553	1572	1553	0		1206	1206	1294	1206	0		1206	1206	1294	1206	0		1553	1553	1572	1553	0		1206	1206	1294	1206	0		1553	1553	1572	1553	0
1572	1572	1553	1572	0		1294	1294	1206	1294	0		1294	1294	1206	1294	0		1572	1572	1553	1572	0		1294	1294	1206	1294	0		1572	1572	1553	1572	0
1615	1615	1625	1615	0		1295	1295	1205	1295	0		1295	1295	1205	1295	0		1642	1642	0	1642	1681		1295	1295	1205	1295	0		1642	1642	0	1642	1681
1616	1616	1624	1616	0		1302	1302	0	1302	1200		1302	1302	0	1302	1200		1681	1681	0	1681	1642		1302	1302	0	1302	1200		1681	1681	0	1681	1642
1617	1617	1623	1617	0		1553	1553	1572	1553	0		1553	1553	1572	1553	0		2015	2015	0	2015	2121		1553	1553	1572	1553	0		2015	2015	0	2015	2121
1623	1623	1617	1623	0		1554	1554	1571	1554	0		1554	1554	1571	1554	0		2024	2024	2112	2024	0		1554	1554	1571	1554	0		2024	2024	2112	2024	0
1624	1624	1616	1624	0		1555	1555	1570	1555	0		1555	1555	1570	1555	0		2025	2025	2111	2025	0		1555	1555	1570	1555	0		2025	2025	2111	2025	0
1625	1625	1615	1625	0		1556	1556	1569	1556	0		1556	1556	1569	1556	0		2026	2026	2110	2026	0		1556	1556	1569	1556	0		2026	2026	2110	2026	0
1642	1642	0	1642	1681		1557	1557	1568	1557	0		1557	1557	1568	1557	0		2027	2027	2109	2027	0		1557	1557	1568	1557	0		2027	2027	2109	2027	0
1681	1681	0	1681	1642		1568	1568	1557	1568	0		1568	1568	1557	1568	0		2028	2028	2108	2028	0		1568	1568	1557	1568	0		2028	2028	2108	2028	0
2015	2015	0	2015	2121		1569	1569	1556	1569	0		1569	1569	1556	1569	0		2029	2029	2107	2029	0		1569	1569	1556	1569	0		2029	2029	2107	2029	0
2024	2024	2112	2024	0		1570	1570	1555	1570	0		1570	1570	1555	1570	0		2030	2030	2106	2030	0		1570	1570	1555	1570	0		2030	2030	2106	2030	0
2025	2025	2111	2025	0		1571	1571	1554	1571	0		1571	1571	1554	1571	0		2031	2031	2105	2031	0		1571	1571	1554	1571	0		2031	2031	2105	2031	0
2026	2026	2110	2026	0		1572	1572	1553	1572	0		1572	1572	1553	1572	0		2032	2032	2104	2032	0		1572	1572	1553	1572	0		2032	2032	2104	2032	0
2027	2027	2109	2027	0		1642	1642	0	1642	1681		1642	1642	0	1642	1681		2033	2033	2103	2033	0		1642	1642	0	1642	1681		2033	2033	2103	2033	0
2028	2028	2108	2028	0		1681	1681	0	1681	1642		1681	1681	0	1681	1642		2103	2103	2033	2103	0		1681	1681	0	1681	1642		2103	2103	2033	2103	0
2029	2029	2107	2029	0		2015	2015	0	2015	2121		2015	2015	0	2015	2121		2104	2104	2032	2104	0		2015	2015	0	2015	2121		2104	2104	2032	2104	0
2030	2030	2106	2030	0		2024	2024	2112	2024	0		2024	2024	2112	2024	0		2105	2105	2031	2105	0		2024	2024	2112	2024	0		2105	2105	2031	2105	0
2031	2031	2105	2031	0		2025	2025	2111	2025	0		2025	2025	2111	2025	0		2106	2106	2030	2106	0		2025	2025	2111	2025	0		2106	2106	2030	2106	0
2032	2032	2104	2032	0		2026	2026	2110	2026	0		2026	2026	2110	2026	0		2107	2107	2029	2107	0		2026	2026	2110	2026	0		2107	2107	2029	2107	0
2033	2033	2103	2033	0		2027	2027	2109	2027	0		2027	2027	2109	2027	0		2108	2108	2028	2108	0		2027	2027	2109	2027	0		2108	2108	2028	2108	0
2103	2103	2033	2103	0		2028	2028	2108	2028	0		2028	2028	2108	2028	0		2109	2109	2027	2109	0		2028	2028	2108	2028	0		2109	2109	2027	2109	0
2104	2104	2032	2104	0		2029	2029	2107	2029	0		2029	2029	2107	2029	0		2110	2110	2026	2110	0		2029	2029	2107	2029	0		2110	2110	2026	2110	0
2105	2105	2031	2105	0		2030	2030	2106	2030	0		2030	2030	2106	2030	0		2111	2111	2025	2111	0		2030	2030	2106	2030	0		2111	2111	2025	2111	0
2106	2106	2030	2106	0		2031	2031	2105	2031	0		2031	2031	2105	2031	0		2112	2112	2024	2112	0		2031	2031	2105	2031	0		2112	2112	2024	2112	0
2107	2107	2029	2107	0		2032	2032	2104	2032	0		2032	2032	2104	2032	0		2121	2121	0	2121	2015		2032	2032	2104	2032	0		2121	2121	0	2121	2015
2108	2108	2028	2108	0		2033	2033	2103	2033	0		2033	2033	2103	2033	0		2727	2727	2745	2727	0		2033	2033	2103	2033	0		2727	2727	2745	2727	0
2109	2109	2027	2109	0		2103	2103	2033	2103	0		2103	2103	2033	2103	0		2728	2728	2744	2728	0		2103	2103	2033	2103	0		2728	2728	2744	2728	0
2110	2110	2026	2110	0		2104	2104	2032	2104	0		2104	2104	2032	2104	0		2729	2729	2743	2729	0		2104	2104	2032	2104	0		2729	2729	2743	2729	0
2111	2111	2025	2111	0		2105	2105	2031	2105	0		2105	2105	2031	2105	0		2730	2730	2742	2730	0		2105	2105	2031	2105	0		2730	2730	2742	2730	0
2112	2112	2024	2112	0		2106	2106	2030	2106	0		2106	2106	2030	2106	0		2731	2731	2740	2731	0		2106	2106	2030	2106	0		2731	2731	2740	2731	0
2121	2121	0	2121	2015		2107	2107	2029	2107	0		2107	2107	2029	2107	0		2732	2732	2739	2732	0		2107	2107	2029	2107	0		2732	2732	2739	2732	0
2727	2727	2745	2727	0		2108	2108	2028	2108	0		2108	2108	2028	2108	0		2739	2739	2732	2739	0		2108	2108	2028	2108	0		2739	2739	2732	2739	0
2728	2728	2744	2728	0		2109	2109	2027	2109	0		2109	2109	2027	2109	0		2740	2740	2731	2740	0		2109	2109	2027	2109	0		2740	2740	2731	2740	0
2729	2729	2743	2729	0		2110	2110	2026	2110	0		2110	2110	2026	2110	0		2742	2742	2730	2742	0		2110	2110	2026	2110	0		2742	2742	2730	2742	0
2730	2730	2742	2730	0		2111	2111	2025	2111	0		2111	2111	2025	2111	0		2743	2743	2729	2743	0		2111	2111	2025	2111	0		2743	2743	2729	2743	0
2731	2731	2740	2731	0		2112	2112	2024	2112	0		2112	2112	2024	2112	0		2744	2744	2728	2744	0		2112	2112	2024	2112	0		2744	2744	2728	2744	0
2732	2732	2739	2732	0		2121	2121	0	2121	2015		2121	2121	0	2121	2015		2745	2745	2727	2745	0		2121	2121	0	2121	2015		2745	2745	2727	2745	0
2739	2739	2732	2739	0		2727	2727	2745	2727	0		2727	2727	2745	2727	0		2781	2781	2802	2781	0		2727	2727	2745	2727	0		2781	2781	2802	2781	0
2740	2740	2731	2740	0		2728	2728	2744	2728	0		2728	2728	2744	2728	0		2782	2782	2801	2782	0		2728	2728	2744	2728	0		2782	2782	2801	2782	0
2742	2742	2730	2742	0		2729	2729	2743	2729	0		2729	2729	2743	2729	0		2783	2783	2800	2783	0		2729	2729	2743	2729	0		2783	2783	2800	2783	0
2743	2743	2729	2743	0		2730	2730	2742	2730	0		2730	2730	2742	2730	0		2784	2784	2799	2784	0		2730	2730	2742	2730	0		2784	2784	2799	2784	0
2744	2744	2728	2744	0		2731	2731	2740	2731	0		2731	2731	2740	2731	0		2785	2785	2798	2785	0		2731	2731	2740	2731	0		2785	2785	2798	2785	0
2745	2745	2727	2745	0		2732	2732	2739	2732	0		2732	2732	2739	2732	0		2786	2786	2797	2786	0		2732	2732	2739	2732	0		2786	2786	2797	2786	0
2779	2779	2804	2779	0		2739	2739	2732	2739	0		2739	2739	2732	2739	0		2787	2787	2795	2787	0		2739	2739	2732	2739	0		2787	2787	2795	2787	0
2781	2781	2802	2781	0		2740	2740	2731	2740	0		2740	2740	2731	2740	0		2788	2788	2794	2788	0		2740	2740	2731	2740	0		2788	2788	2794	2788	0
2782	2782	2801	2782	0		2742	2742	2730	2742	0		2742	2742	2730	2742	0		2789	2789	2793	2789	0		2742	2742	2730	2742	0		2789	2789	2793	2789	0
2783	2783	2800	2783	0		2743	2743	2729	2743	0		2743	2743	2729	2743	0		2793	2793	2789	2793	0		2743	2743	2729	2743	0		2793	2793	2789	2793	0
2784	2784	2799	2784	0		2744	2744	2728	2744	0		2744	2744	2728	2744	0		2794	2794	2788	2794	0		2744	2744	2728	2744	0		2794	2794	2788	2794	0
2785	2785	2798	2785	0		2745	2745	2727	2745	0		2745	2745	2727	2745	0		2795	2795	2787	2795	0		2745	2745	2727	2745	0		2795	2795	2787	2795	0
2786	2786	2797	2786	0		2781	2781	2802	2781	0		2781	2781	2802	2781	0		2797	2797	2786	2797	0		2781	2781	2802	2781	0		2797	2797	2786	2797	0
2787	2787	2795	2787	0		2782	2782	2801	2782	0		2782	2782	2801	2782	0		2798	2798	2785	2798	0		2782	2782	2801	2782	0		2798	2798	2785	2798	0
2788	2788	2794	2788	0		2783	2783	2800	2783	0		2783	2783	2800	2783	0		2799	2799	2784	2799	0		2783	2783	2800	2783	0		2799	2799	2784	2799	0
2789	2789	2793	2789	0		2784	2784	2799	2784	0		2784	2784	2799	2784	0		2800	2800	2783	2800	0		2784	2784	2799	2784	0		2800	2800	2783	2800	0
2793	2793	2789	2793	0		2785	2785	2798	2785	0		2785	2785	2798	2785	0		2801	2801	2782	2801	0		2785	2785	2798	2785	0		2801	2801	2782	2801	0
2794	2794	2788	2794	0		2786	2786	2797	2786	0		2786	2786	2797	2786	0		2802	2802	2781	2802	0		2786	2786	2797	2786	0		2802	2802	2781	2802	0
2795	2795	2787	2795	0		2787	2787	2795	2787	0		2787	2787	2795	2787	0		2814	2814	2833	2814	0		2787	2787	2795	2787	0		2814	2814	2833	2814	0
2797	2797	2786	2797	0		2788	2788	2794	2788	0		2788	2788	2794	2788	0		2815	2815	2832	2815	0		2788	2788	2794	2788	0		2815	2815	2832	2815	0
2798	2798	2785	2798	0		2789	2789	2793	2789	0		2789	2789	2793	2789	0		2816	2816	2831	2816	0		2789	2789	2793	2789	0		2816	2816	2831	2816	0
2799	2799	2784	2799	0		2793	2793	2789	2793	0		2793	2793	2789	2793	0		2817	2817	2830	2817	0		2793	2793	2789	2793	0		2817	2817	2830	2817	0
2800	2800	2783	2800	0		2794	2794	2788	2794	0		2794	2794	2788	2794	0		2818	2818	2829	2818	0		2794	2794	2788	2794	0		2818	2818	2829	2818	0
2801	2801	2782	2801	0		2795	2795	2787	2795	0		2795	2795	2787	2795	0		2819	2819	2828	2819	0		2795	2795	2787	2795	0		2819	2819	2828	2819	0
2802	2802	2781	2802	0		2797	2797	2786	2797	0		2797	2797	2786	2797	0		2828	2828	2819	2828	0		2797	2797	2786	2797	0		2828	2828	2819	2828	0
2804	2804	2779	2804	0		2798	2798	2785	2798	0		2798	2798	2785	2798	0		2829	2829	2818	2829	0		2798	2798	2785	2798	0		2829	2829	2818	2829	0
2814	2814	2833	2814	0		2799	2799	2784	2799	0		2799	2799	2784	2799	0		2830	2830	2817	2830	0		2799	2799	2784	2799	0		2830	2830	2817	2830	0
2815	2815	2832	2815	0		2800	2800	2783	2800	0		2800	2800	2783	2800	0		2831	2831	2816	2831	0		2800	2800	2783	2800	0		2831	2831	2816	2831	0
2816	2816	2831	2816	0		2801	2801	2782	2801	0		2801	2801	2782	2801	0		2832	2832	2815	2832	0		2801	2801	2782	2801	0		2832	2832	2815	2832	0
2817	2817	2830	2817	0		2802	2802	2781	2802	0		2802	2802	2781	2802	0		2833	2833	2814	2833	0		2802	2802	2781	2802	0		2833	2833	2814	2833	0
2818	2818	2829	2818	0		2814	2814	2833	2814	0		2814	2814	2833	2814	0		3811	3811	3906	3811	0		2814	2814	2833	2814	0		3812	3812	3905	3812	0
2819	2819	2828	2819	0		2815	2815	2832	2815	0		2815	2815	2832	2815	0		3812	3812	3905	3812	0		2815	2815	2832	2815	0		3813	3813	3904	3813	0
2828	2828	2819	2828	0		2816	2816	2831	2816	0		2816	2816	2831	2816	0		3813	3813	3904	3813	0		2816	2816	2831	2816	0		3815	3815	3902	3815	0
2829	2829	2818	2829	0		2817	2817	2830	2817	0		2817	2817	2830	2817	0		3815	3815	3902	3815	0		2817	2817	2830	2817	0		3818	3818	3899	3818	0
2830	2830	2817	2830	0		2818	2818	2829	2818	0		2818	2818	2829	2818	0		3818	3818	3899	3818	0		2818	2818	2829	2818	0		3819	3819	3898	3819	0
2831	2831	2816	2831	0		2819	2819	2828	2819	0		2819	2819	2828	2819	0		3819	3819	3898	3819	0		2819	2819	2828	2819	0		3820	3820	3897	3820	0
2832	2832	2815	2832	0		2828	2828	2819	2828	0		2828	2828	2819	2828	0		3820	3820	3897	3820	0		2828	2828	2819	2828	0		3821	3821	3896	3821	0
2833	2833	2814	2833	0		2829	2829	2818	2829	0		2829	2829	2818	2829	0		3821	3821	3896	3821	0		2829	2829	2818	2829	0		3822	3822	3895	3822	0
3812	3812	3905	3812	0		2830	2830	2817	2830	0		2830	2830	2817	2830	0		3822	3822	3895	3822	0		2830	2830	2817	2830	0		3823	3823	3894	3823	0
3813	3813	3904	3813	0		2831	2831	2816	2831	0		2831	2831	2816	2831	0		3823	3823	3894	3823	0		2831	2831	2816	2831	0		3824	3824	3893	3824	0
3815	3815	3902	3815	0		2832	2832	2815	2832	0		2832	2832	2815	2832	0		3824	3824	3893	3824	0		2832	2832	2815	2832	0		3825	3825	3892	3825	0
3818	3818	3899	3818	0		2833	2833	2814	2833	0		2833	2833	2814	2833	0		3825	3825	3892	3825	0		2833	2833	2814	2833	0		3826	3826	3891	3826	0
3819	3819	3898	3819	0		3811	3811	3906	3811	0		3812	3812	3905	3812	0		3826	3826	3891	3826	0		3812	3812	3905	3812	0		3891	3891	3826	3891	0
3820	3820	3897	3820	0		3812	3812	3905	3812	0		3813	3813	3904	3813	0		3891	3891	3826	3891	0		3813	3813	3904	3813	0		3892	3892	3825	3892	0
3821	3821	3896	3821	0		3813	3813	3904	3813	0		3815	3815	3902	3815	0		3892	3892	3825	3892	0		3815	3815	3902	3815	0		3893	3893	3824	3893	0
3822	3822	3895	3822	0		3815	3815	3902	3815	0		3818	3818	3899	3818	0		3893	3893	3824	3893	0		3818	3818	3899	3818	0		3894	3894	3823	3894	0
3823	3823	3894	3823	0		3818	3818	3899	3818	0		3819	3819	3898	3819	0		3894	3894	3823	3894	0		3819	3819	3898	3819	0		3895	3895	3822	3895	0
3824	3824	3893	3824	0		3819	3819	3898	3819	0		3820	3820	3897	3820	0		3895	3895	3822	3895	0		3820	3820	3897	3820	0		3896	3896	3821	3896	0
3825	3825	3892	3825	0		3820	3820	3897	3820	0		3821	3821	3896	3821	0		3896	3896	3821	3896	0		3821	3821	3896	3821	0		3897	3897	3820	3897	0
3826	3826	3891	3826	0		3821	3821	3896	3821	0		3822	3822	3895	3822	0		3897	3897	3820	3897	0		3822	3822	3895	3822	0		3898	3898	3819	3898	0
3891	3891	3826	3891	0		3822	3822	3895	3822	0		3823	3823	3894	3823	0		3898	3898	3819	3898	0		3823	3823	3894	3823	0		3899	3899	3818	3899	0
3892	3892	3825	3892	0		3823	3823	3894	3823	0		3824	3824	3893	3824	0		3899	3899	3818	3899	0		3824	3824	3893	3824	0		3902	3902	3815	3902	0
3893	3893	3824	3893	0		3824	3824	3893	3824	0		3825	3825	3892	3825	0		3902	3902	3815	3902	0		3825	3825	3892	3825	0		3904	3904	3813	3904	0
3894	3894	3823	3894	0		3825	3825	3892	3825	0		3826	3826	3891	3826	0		3904	3904	3813	3904	0		3826	3826	3891	3826	0		3905	3905	3812	3905	0
3895	3895	3822	3895	0		3826	3826	3891	3826	0		3891	3891	3826	3891	0		3905	3905	3812	3905	0		3891	3891	3826	3891	0		4893	4893	4914	4893	0
3896	3896	3821	3896	0		3891	3891	3826	3891	0		3892	3892	3825	3892	0		3906	3906	3811	3906	0		3892	3892	3825	3892	0		4894	4894	4913	4894	0
3897	3897	3820	3897	0		3892	3892	3825	3892	0		3893	3893	3824	3893	0		4893	4893	4914	4893	0		3893	3893	3824	3893	0		4895	4895	4912	4895	0
3898	3898	3819	3898	0		3893	3893	3824	3893	0		3894	3894	3823	3894	0		4894	4894	4913	4894	0		3894	3894	3823	3894	0		4896	4896	4911	4896	0
3899	3899	3818	3899	0		3894	3894	3823	3894	0		3895	3895	3822	3895	0		4895	4895	4912	4895	0		3895	3895	3822	3895	0		4897	4897	4910	4897	0
3902	3902	3815	3902	0		3895	3895	3822	3895	0		3896	3896	3821	3896	0		4896	4896	4911	4896	0		3896	3896	3821	3896	0		4910	4910	4897	4910	0
3904	3904	3813	3904	0		3896	3896	3821	3896	0		3897	3897	3820	3897	0		4897	4897	4910	4897	0		3897	3897	3820	3897	0		4911	4911	4896	4911	0
3905	3905	3812	3905	0		3897	3897	3820	3897	0		3898	3898	3819	3898	0		4910	4910	4897	4910	0		3898	3898	3819	3898	0		4912	4912	4895	4912	0
4893	4893	4914	4893	0		3898	3898	3819	3898	0		3899	3899	3818	3899	0		4911	4911	4896	4911	0		3899	3899	3818	3899	0		4913	4913	4894	4913	0
4894	4894	4913	4894	0		3899	3899	3818	3899	0		3902	3902	3815	3902	0		4912	4912	4895	4912	0		3902	3902	3815	3902	0		4914	4914	4893	4914	0
4895	4895	4912	4895	0		3902	3902	3815	3902	0		3904	3904	3813	3904	0		4913	4913	4894	4913	0		3904	3904	3813	3904	0		5066	5066	0	5066	5144
4896	4896	4911	4896	0		3904	3904	3813	3904	0		3905	3905	3812	3905	0		4914	4914	4893	4914	0		3905	3905	3812	3905	0		5067	5067	0	5067	5143
4897	4897	4910	4897	0		3905	3905	3812	3905	0		4893	4893	4914	4893	0		7351	7351	7382	7351	0		4893	4893	4914	4893	0		5143	5143	0	5143	5067
4910	4910	4897	4910	0		3906	3906	3811	3906	0		4894	4894	4913	4894	0		7353	7353	7380	7353	0		4894	4894	4913	4894	0		5144	5144	0	5144	5066
4911	4911	4896	4911	0		4893	4893	4914	4893	0		4895	4895	4912	4895	0		7354	7354	7379	7354	0		4895	4895	4912	4895	0		7351	7351	7382	7351	0
4912	4912	4895	4912	0		4894	4894	4913	4894	0		4896	4896	4911	4896	0		7355	7355	7378	7355	0		4896	4896	4911	4896	0		7353	7353	7380	7353	0
4913	4913	4894	4913	0		4895	4895	4912	4895	0		4897	4897	4910	4897	0		7358	7358	7374	7358	0		4897	4897	4910	4897	0		7354	7354	7379	7354	0
4914	4914	4893	4914	0		4896	4896	4911	4896	0		4910	4910	4897	4910	0		7359	7359	7373	7359	0		4910	4910	4897	4910	0		7355	7355	7378	7355	0
5066	5066	0	5066	5144		4897	4897	4910	4897	0		4911	4911	4896	4911	0		7360	7360	7372	7360	0		4911	4911	4896	4911	0		7358	7358	7374	7358	0
5067	5067	0	5067	5143		4910	4910	4897	4910	0		4912	4912	4895	4912	0		7361	7361	7371	7361	0		4912	4912	4895	4912	0		7359	7359	7373	7359	0
5143	5143	0	5143	5067		4911	4911	4896	4911	0		4913	4913	4894	4913	0		7362	7362	7370	7362	0		4913	4913	4894	4913	0		7360	7360	7372	7360	0
5144	5144	0	5144	5066		4912	4912	4895	4912	0		4914	4914	4893	4914	0		7370	7370	7362	7370	0		4914	4914	4893	4914	0		7361	7361	7371	7361	0
7351	7351	7382	7351	0		4913	4913	4894	4913	0		5066	5066	0	5066	5144		7371	7371	7361	7371	0		5066	5066	0	5066	5144		7362	7362	7370	7362	0
7353	7353	7380	7353	0		4914	4914	4893	4914	0		5067	5067	0	5067	5143		7372	7372	7360	7372	0		5067	5067	0	5067	5143		7370	7370	7362	7370	0
7354	7354	7379	7354	0		7351	7351	7382	7351	0		5143	5143	0	5143	5067		7373	7373	7359	7373	0		5143	5143	0	5143	5067		7371	7371	7361	7371	0
7355	7355	7378	7355	0		7353	7353	7380	7353	0		5144	5144	0	5144	5066		7374	7374	7358	7374	0		5144	5144	0	5144	5066		7372	7372	7360	7372	0
7358	7358	7374	7358	0		7354	7354	7379	7354	0		7351	7351	7382	7351	0		7378	7378	7355	7378	0		7351	7351	7382	7351	0		7373	7373	7359	7373	0
7359	7359	7373	7359	0		7355	7355	7378	7355	0		7353	7353	7380	7353	0		7379	7379	7354	7379	0		7353	7353	7380	7353	0		7374	7374	7358	7374	0
7360	7360	7372	7360	0		7358	7358	7374	7358	0		7354	7354	7379	7354	0		7380	7380	7353	7380	0		7354	7354	7379	7354	0		7378	7378	7355	7378	0
7361	7361	7371	7361	0		7359	7359	7373	7359	0		7355	7355	7378	7355	0		7382	7382	7351	7382	0		7355	7355	7378	7355	0		7379	7379	7354	7379	0
7362	7362	7370	7362	0		7360	7360	7372	7360	0		7358	7358	7374	7358	0		8687	8687	0	8687	8692		7358	7358	7374	7358	0		7380	7380	7353	7380	0
7370	7370	7362	7370	0		7361	7361	7371	7361	0		7359	7359	7373	7359	0		8692	8692	0	8692	8687		7359	7359	7373	7359	0		7382	7382	7351	7382	0
7371	7371	7361	7371	0		7362	7362	7370	7362	0		7360	7360	7372	7360	0		9042	9042	9057	9042	0		7360	7360	7372	7360	0		8687	8687	0	8687	8692
7372	7372	7360	7372	0		7370	7370	7362	7370	0		7361	7361	7371	7361	0		9043	9043	9056	9043	0		7361	7361	7371	7361	0		8692	8692	0	8692	8687
7373	7373	7359	7373	0		7371	7371	7361	7371	0		7362	7362	7370	7362	0		9044	9044	9055	9044	0		7362	7362	7370	7362	0		9042	9042	9057	9042	0
7374	7374	7358	7374	0		7372	7372	7360	7372	0		7370	7370	7362	7370	0		9045	9045	9054	9045	0		7370	7370	7362	7370	0		9043	9043	9056	9043	0
7378	7378	7355	7378	0		7373	7373	7359	7373	0		7371	7371	7361	7371	0		9046	9046	9053	9046	0		7371	7371	7361	7371	0		9044	9044	9055	9044	0
7379	7379	7354	7379	0		7374	7374	7358	7374	0		7372	7372	7360	7372	0		9053	9053	9046	9053	0		7372	7372	7360	7372	0		9045	9045	9054	9045	0
7380	7380	7353	7380	0		7378	7378	7355	7378	0		7373	7373	7359	7373	0		9054	9054	9045	9054	0		7373	7373	7359	7373	0		9046	9046	9053	9046	0
7382	7382	7351	7382	0		7379	7379	7354	7379	0		7374	7374	7358	7374	0		9055	9055	9044	9055	0		7374	7374	7358	7374	0		9053	9053	9046	9053	0
8687	8687	0	8687	8692		7380	7380	7353	7380	0		7378	7378	7355	7378	0		9056	9056	9043	9056	0		7378	7378	7355	7378	0		9054	9054	9045	9054	0
8692	8692	0	8692	8687		7382	7382	7351	7382	0		7379	7379	7354	7379	0		9057	9057	9042	9057	0		7379	7379	7354	7379	0		9055	9055	9044	9055	0
9042	9042	9057	9042	0		8687	8687	0	8687	8692		7380	7380	7353	7380	0		9145	9145	9165	9145	0		7380	7380	7353	7380	0		9056	9056	9043	9056	0
9043	9043	9056	9043	0		8692	8692	0	8692	8687		7382	7382	7351	7382	0		9165	9165	9145	9165	0		7382	7382	7351	7382	0		9057	9057	9042	9057	0
9044	9044	9055	9044	0		9042	9042	9057	9042	0		8687	8687	0	8687	8692								8687	8687	0	8687	8692		9145	9145	9165	9145	0
9045	9045	9054	9045	0		9043	9043	9056	9043	0		8692	8692	0	8692	8687								8692	8692	0	8692	8687		9165	9165	9145	9165	0
9046	9046	9053	9046	0		9044	9044	9055	9044	0		9042	9042	9057	9042	0								9042	9042	9057	9042	0
9053	9053	9046	9053	0		9045	9045	9054	9045	0		9043	9043	9056	9043	0								9043	9043	9056	9043	0
9054	9054	9045	9054	0		9046	9046	9053	9046	0		9044	9044	9055	9044	0								9044	9044	9055	9044	0
9055	9055	9044	9055	0		9053	9053	9046	9053	0		9045	9045	9054	9045	0								9045	9045	9054	9045	0
9056	9056	9043	9056	0		9054	9054	9045	9054	0		9046	9046	9053	9046	0								9046	9046	9053	9046	0
9057	9057	9042	9057	0		9055	9055	9044	9055	0		9053	9053	9046	9053	0								9053	9053	9046	9053	0
9145	9145	9165	9145	0		9056	9056	9043	9056	0		9054	9054	9045	9054	0								9054	9054	9045	9054	0
9165	9165	9145	9165	0		9057	9057	9042	9057	0		9055	9055	9044	9055	0								9055	9055	9044	9055	0
						9145	9145	9165	9145	0		9056	9056	9043	9056	0								9056	9056	9043	9056	0
\	3313	3285	3313	0		9165	9165	9145	9165	0		9057	9057	9042	9057	0								9057	9057	9042	9057	0
3315	3315	3284	3315	0								9145	9145	9165	9145	0								9145	9145	9165	9145	0
3316	3316	3283	3316	0								9165	9165	9145	9165	0								9165	9165	9145	9165	0
3318	3318	3281	3318	0
3319	3319	3280	3319	0
3320	3320	3279	3320	0
3321	3321	3278	3321	0
3322	3322	3277	3322	0
3323	3323	3276	3323	0
3324	3324	3275	3324	0
3325	3325	3274	3325	0
3372	3372	3402	3372	0
3373	3373	3401	3373	0
3374	3374	3400	3374	0
3375	3375	3399	3375	0
3376	3376	3398	3376	0
3377	3377	3397	3377	0
3378	3378	3396	3378	0
3382	3382	3392	3382	0
3383	3383	3391	3383	0
3384	3384	3390	3384	0
3385	3385	3389	3385	0
3389	3389	3385	3389	0
3390	3390	3384	3390	0
3391	3391	3383	3391	0
3392	3392	3382	3392	0
3396	3396	3378	3396	0
3397	3397	3377	3397	0
3398	3398	3376	3398	0
3399	3399	3375	3399	0
3400	3400	3374	3400	0
3401	3401	3373	3401	0
3402	3402	3372	3402	0
3526	3526	0	3526	3584
3527	3527	0	3527	3583
3583	3583	0	3583	3527
3584	3584	0	3584	3526
3605	3605	3647	3605	0
3606	3606	3646	3606	0
3607	3607	3645	3607	0
3608	3608	3644	3608	0
3609	3609	3643	3609	0
3610	3610	3642	3610	0
3611	3611	3641	3611	0
3612	3612	3640	3612	0
3613	3613	3639	3613	0
3615	3615	3636	3615	0
3616	3616	3635	3616	0
3617	3617	3634	3617	0
3618	3618	3633	3618	0
3620	3620	3631	3620	0
3621	3621	3630	3621	0
3622	3622	3629	3622	0
3629	3629	3622	3629	0
3630	3630	3621	3630	0
3631	3631	3620	3631	0
3633	3633	3618	3633	0
3634	3634	3617	3634	0
3635	3635	3616	3635	0
3636	3636	3615	3636	0
3639	3639	3613	3639	0
3640	3640	3612	3640	0
3641	3641	3611	3641	0
3642	3642	3610	3642	0
3643	3643	3609	3643	0
3644	3644	3608	3644	0
3645	3645	3607	3645	0
3646	3646	3606	3646	0
3647	3647	3605	3647	0
3909	3909	3932	3909	0
3910	3910	3931	3910	0
3911	3911	3930	3911	0
3912	3912	3929	3912	0
3913	3913	3928	3913	0
3914	3914	3927	3914	0
3915	3915	3926	3915	0
3916	3916	3925	3916	0
3925	3925	3916	3925	0
3926	3926	3915	3926	0
3927	3927	3914	3927	0
3928	3928	3913	3928	0
3929	3929	3912	3929	0
3930	3930	3911	3930	0
3931	3931	3910	3931	0
3932	3932	3909	3932	0
3943	3943	3970	3943	0
3944	3944	3969	3944	0
3945	3945	3968	3945	0
3946	3946	3967	3946	0
3947	3947	3966	3947	0
3949	3949	3962	3949	0
3950	3950	3961	3950	0
3951	3951	3960	3951	0
3952	3952	3959	3952	0
3959	3959	3952	3959	0
3960	3960	3951	3960	0
3961	3961	3950	3961	0
3962	3962	3949	3962	0
3966	3966	3947	3966	0
3967	3967	3946	3967	0
3968	3968	3945	3968	0
3969	3969	3944	3969	0
3970	3970	3943	3970	0
3991	3991	4017	3991	0
3992	3992	4016	3992	0
3993	3993	4015	3993	0
3994	3994	4014	3994	0
3995	3995	4012	3995	0
3996	3996	4011	3996	0
3998	3998	4009	3998	0
3999	3999	4008	3999	0
4000	4000	4007	4000	0
4007	4007	4000	4007	0
4008	4008	3999	4008	0
4009	4009	3998	4009	0
4011	4011	3996	4011	0
4012	4012	3995	4012	0
4014	4014	3994	4014	0
4015	4015	3993	4015	0
4016	4016	3992	4016	0
4017	4017	3991	4017	0
4033	4033	4082	4033	0
4034	4034	4081	4034	0
4035	4035	4080	4035	0
4036	4036	4079	4036	0
4037	4037	4078	4037	0
4038	4038	4077	4038	0
4039	4039	4076	4039	0
4040	4040	4075	4040	0
4045	4045	4070	4045	0
4046	4046	4069	4046	0
4047	4047	4068	4047	0
4048	4048	4067	4048	0
4049	4049	4066	4049	0
4050	4050	4063	4050	0
4051	4051	4062	4051	0
4052	4052	4061	4052	0
4053	4053	4060	4053	0
4060	4060	4053	4060	0
4061	4061	4052	4061	0
4062	4062	4051	4062	0
4063	4063	4050	4063	0
4066	4066	4049	4066	0
4067	4067	4048	4067	0
4068	4068	4047	4068	0
4069	4069	4046	4069	0
4070	4070	4045	4070	0
4075	4075	4040	4075	0
4076	4076	4039	4076	0
4077	4077	4038	4077	0
4078	4078	4037	4078	0
4079	4079	4036	4079	0
4080	4080	4035	4080	0
4081	4081	4034	4081	0
4082	4082	4033	4082	0
4194	4194	4218	4194	0
4195	4195	4217	4195	0
4197	4197	4215	4197	0
4198	4198	4214	4198	0
4199	4199	4213	4199	0
4201	4201	4212	4201	0
4202	4202	4211	4202	0
4203	4203	4210	4203	0
4210	4210	4203	4210	0
4211	4211	4202	4211	0
4212	4212	4201	4212	0
4213	4213	4199	4213	0
4214	4214	4198	4214	0
4215	4215	4197	4215	0
4217	4217	4195	4217	0
4218	4218	4194	4218	0
4251	4251	4264	4251	0
4252	4252	4263	4252	0
4253	4253	4262	4253	0
4254	4254	4261	4254	0
4261	4261	4254	4261	0
4262	4262	4253	4262	0
4263	4263	4252	4263	0
4264	4264	4251	4264	0
4376	4376	4419	4376	0
4382	4382	4413	4382	0
4386	4386	4408	4386	0
4387	4387	4407	4387	0
4389	4389	4405	4389	0
4390	4390	4404	4390	0
4391	4391	4403	4391	0
4392	4392	4402	4392	0
4393	4393	4401	4393	0
4394	4394	4400	4394	0
4400	4400	4394	4400	0
4401	4401	4393	4401	0
4402	4402	4392	4402	0
4403	4403	4391	4403	0
4404	4404	4390	4404	0
4405	4405	4389	4405	0
4407	4407	4387	4407	0
4408	4408	4386	4408	0
4413	4413	4382	4413	0
4419	4419	4376	4419	0
4422	4422	4433	4422	0
4423	4423	4432	4423	0
4424	4424	4431	4424	0
4431	4431	4424	4431	0
4432	4432	4423	4432	0
4433	4433	4422	4433	0
4445	4445	4464	4445	0
4446	4446	4463	4446	0
4447	4447	4462	4447	0
4448	4448	4461	4448	0
4449	4449	4460	4449	0
4450	4450	4459	4450	0
4451	4451	4458	4451	0
4458	4458	4451	4458	0
4459	4459	4450	4459	0
4460	4460	4449	4460	0
4461	4461	4448	4461	0
4462	4462	4447	4462	0
4463	4463	4446	4463	0
4464	4464	4445	4464	0
4468	4468	4510	4468	0
4469	4469	4509	4469	0
4470	4470	4508	4470	0
4471	4471	4507	4471	0
4472	4472	4506	4472	0
4476	4476	4499	4476	0
4499	4499	4476	4499	0
4506	4506	4472	4506	0
4507	4507	4471	4507	0
4508	4508	4470	4508	0
4509	4509	4469	4509	0
4510	4510	4468	4510	0
4513	4513	4571	4513	0
4514	4514	4570	4514	0
4515	4515	4569	4515	0
4516	4516	4568	4516	0
4568	4568	4516	4568	0
4569	4569	4515	4569	0
4570	4570	4514	4570	0
4571	4571	4513	4571	0
4602	4602	4625	4602	0
4603	4603	4624	4603	0
4609	4609	4618	4609	0
4610	4610	4617	4610	0
4611	4611	4616	4611	0
4616	4616	4611	4616	0
4617	4617	4610	4617	0
4618	4618	4609	4618	0
4624	4624	4603	4624	0
4625	4625	4602	4625	0
4656	4656	4680	4656	0
4657	4657	4679	4657	0
4658	4658	4678	4658	0
4659	4659	4677	4659	0
4660	4660	4676	4660	0
4662	4662	4673	4662	0
4663	4663	4672	4663	0
4664	4664	4671	4664	0
4665	4665	4670	4665	0
4670	4670	4665	4670	0
4671	4671	4664	4671	0
4672	4672	4663	4672	0
4673	4673	4662	4673	0
4676	4676	4660	4676	0
4677	4677	4659	4677	0
4678	4678	4658	4678	0
4679	4679	4657	4679	0
4680	4680	4656	4680	0
4726	4726	4778	4726	0
4727	4727	4777	4727	0
4728	4728	4776	4728	0
4729	4729	4775	4729	0
4732	4732	4773	4732	0
4733	4733	4772	4733	0
4772	4772	4733	4772	0
4773	4773	4732	4773	0
4775	4775	4729	4775	0
4776	4776	4728	4776	0
4777	4777	4727	4777	0
4778	4778	4726	4778	0
4808	4808	4819	4808	0
4809	4809	4818	4809	0
4810	4810	4817	4810	0
4817	4817	4810	4817	0
4818	4818	4809	4818	0
4819	4819	4808	4819	0
5092	5092	0	5092	5154
5093	5093	0	5093	5153
5094	5094	0	5094	5152
5152	5152	0	5152	5094
5153	5153	0	5153	5093
5154	5154	0	5154	5092
5168	5168	5198	5168	0
5169	5169	5197	5169	0
5170	5170	5196	5170	0
5171	5171	5195	5171	0
5173	5173	5194	5173	0
5174	5174	5193	5174	0
5176	5176	5189	5176	0
5177	5177	5188	5177	0
5178	5178	5187	5178	0
5179	5179	5186	5179	0
5180	5180	5185	5180	0
5185	5185	5180	5185	0
5186	5186	5179	5186	0
5187	5187	5178	5187	0
5188	5188	5177	5188	0
5189	5189	5176	5189	0
5193	5193	5174	5193	0
5194	5194	5173	5194	0
5195	5195	5171	5195	0
5196	5196	5170	5196	0
5197	5197	5169	5197	0
5198	5198	5168	5198	0
5230	5230	5243	5230	0
5231	5231	5242	5231	0
5232	5232	5241	5232	0
5233	5233	5240	5233	0
5240	5240	5233	5240	0
5241	5241	5232	5241	0
5242	5242	5231	5242	0
5243	5243	5230	5243	0
5244	5244	5261	5244	0
5245	5245	5260	5245	0
5246	5246	5259	5246	0
5247	5247	5258	5247	0
5248	5248	5257	5248	0
5249	5249	5256	5249	0
5250	5250	5255	5250	0
5255	5255	5250	5255	0
5256	5256	5249	5256	0
5257	5257	5248	5257	0
5258	5258	5247	5258	0
5259	5259	5246	5259	0
5260	5260	5245	5260	0
5261	5261	5244	5261	0
5277	5277	5290	5277	0
5278	5278	5289	5278	0
5279	5279	5288	5279	0
5280	5280	5287	5280	0
5281	5281	5286	5281	0
5286	5286	5281	5286	0
5287	5287	5280	5287	0
5288	5288	5279	5288	0
5289	5289	5278	5289	0
5290	5290	5277	5290	0
5308	5308	5335	5308	0
5309	5309	5334	5309	0
5311	5311	5333	5311	0
5312	5312	5332	5312	0
5313	5313	5331	5313	0
5315	5315	5329	5315	0
5316	5316	5328	5316	0
5317	5317	5327	5317	0
5318	5318	5326	5318	0
5326	5326	5318	5326	0
5327	5327	5317	5327	0
5328	5328	5316	5328	0
5329	5329	5315	5329	0
5331	5331	5313	5331	0
5332	5332	5312	5332	0
5333	5333	5311	5333	0
5334	5334	5309	5334	0
5335	5335	5308	5335	0
5340	5340	5381	5340	0
5341	5341	5380	5341	0
5342	5342	5379	5342	0
5343	5343	5378	5343	0
5345	5345	5376	5345	0
5346	5346	5375	5346	0
5347	5347	5374	5347	0
5348	5348	5373	5348	0
5349	5349	5372	5349	0
5356	5356	5371	5356	0
5357	5357	5370	5357	0
5358	5358	5369	5358	0
5359	5359	5368	5359	0
5360	5360	5367	5360	0
5367	5367	5360	5367	0
5368	5368	5359	5368	0
5369	5369	5358	5369	0
5370	5370	5357	5370	0
5371	5371	5356	5371	0
5372	5372	5349	5372	0
5373	5373	5348	5373	0
5374	5374	5347	5374	0
5375	5375	5346	5375	0
5376	5376	5345	5376	0
5378	5378	5343	5378	0
5379	5379	5342	5379	0
5380	5380	5341	5380	0
5381	5381	5340	5381	0
5619	5619	5652	5619	0
5620	5620	5651	5620	0
5624	5624	5647	5624	0
5632	5632	5645	5632	0
5633	5633	5644	5633	0
5644	5644	5633	5644	0
5645	5645	5632	5645	0
5647	5647	5624	5647	0
5651	5651	5620	5651	0
5652	5652	5619	5652	0
5662	5662	5679	5662	0
5663	5663	5678	5663	0
5664	5664	5677	5664	0
5665	5665	5676	5665	0
5666	5666	5675	5666	0
5667	5667	5674	5667	0
5668	5668	5673	5668	0
5673	5673	5668	5673	0
5674	5674	5667	5674	0
5675	5675	5666	5675	0
5676	5676	5665	5676	0
5677	5677	5664	5677	0
5678	5678	5663	5678	0
5679	5679	5662	5679	0
5695	5695	5722	5695	0
5698	5698	5718	5698	0
5699	5699	5717	5699	0
5700	5700	5716	5700	0
5701	5701	5715	5701	0
5703	5703	5712	5703	0
5704	5704	5711	5704	0
5705	5705	5710	5705	0
5710	5710	5705	5710	0
5711	5711	5704	5711	0
5712	5712	5703	5712	0
5715	5715	5701	5715	0
5716	5716	5700	5716	0
5717	5717	5699	5717	0
5718	5718	5698	5718	0
5722	5722	5695	5722	0
5847	5847	5860	5847	0
5848	5848	5859	5848	0
5849	5849	5858	5849	0
5850	5850	5857	5850	0
5857	5857	5850	5857	0
5858	5858	5849	5858	0
5859	5859	5848	5859	0
5860	5860	5847	5860	0
5861	5861	5878	5861	0
5862	5862	5877	5862	0
5863	5863	5876	5863	0
5864	5864	5875	5864	0
5865	5865	5874	5865	0
5866	5866	5873	5866	0
5867	5867	5872	5867	0
5872	5872	5867	5872	0
5873	5873	5866	5873	0
5874	5874	5865	5874	0
5875	5875	5864	5875	0
5876	5876	5863	5876	0
5877	5877	5862	5877	0
5878	5878	5861	5878	0
5885	5885	5928	5885	0
5886	5886	5927	5886	0
5887	5887	5926	5887	0
5888	5888	5925	5888	0
5889	5889	5924	5889	0
5890	5890	5923	5890	0
5892	5892	5922	5892	0
5893	5893	5921	5893	0
5894	5894	5920	5894	0
5895	5895	5919	5895	0
5900	5900	5918	5900	0
5901	5901	5917	5901	0
5902	5902	5916	5902	0
5903	5903	5915	5903	0
5904	5904	5914	5904	0
5905	5905	5913	5905	0
5913	5913	5905	5913	0
5914	5914	5904	5914	0
5915	5915	5903	5915	0
5916	5916	5902	5916	0
5917	5917	5901	5917	0
5918	5918	5900	5918	0
5919	5919	5895	5919	0
5920	5920	5894	5920	0
5921	5921	5893	5921	0
5922	5922	5892	5922	0
5923	5923	5890	5923	0
5924	5924	5889	5924	0
5925	5925	5888	5925	0
5926	5926	5887	5926	0
5927	5927	5886	5927	0
5928	5928	5885	5928	0
6217	6217	6253	6217	0
6218	6218	6252	6218	0
6219	6219	6251	6219	0
6220	6220	6250	6220	0
6221	6221	6249	6221	0
6222	6222	6248	6222	0
6223	6223	6247	6223	0
6224	6224	6245	6224	0
6225	6225	6244	6225	0
6226	6226	6243	6226	0
6230	6230	6241	6230	0
6231	6231	6240	6231	0
6240	6240	6231	6240	0
6241	6241	6230	6241	0
6243	6243	6226	6243	0
6244	6244	6225	6244	0
6245	6245	6224	6245	0
6247	6247	6223	6247	0
6248	6248	6222	6248	0
6249	6249	6221	6249	0
6250	6250	6220	6250	0
6251	6251	6219	6251	0
6252	6252	6218	6252	0
6253	6253	6217	6253	0
6262	6262	6306	6262	0
6263	6263	6305	6263	0
6264	6264	6304	6264	0
6265	6265	6303	6265	0
6266	6266	6302	6266	0
6267	6267	6300	6267	0
6269	6269	6298	6269	0
6270	6270	6297	6270	0
6271	6271	6296	6271	0
6272	6272	6295	6272	0
6273	6273	6294	6273	0
6274	6274	6293	6274	0
6275	6275	6292	6275	0
6277	6277	6290	6277	0
6278	6278	6289	6278	0
6279	6279	6288	6279	0
6280	6280	6287	6280	0
6287	6287	6280	6287	0
6288	6288	6279	6288	0
6289	6289	6278	6289	0
6290	6290	6277	6290	0
6292	6292	6275	6292	0
6293	6293	6274	6293	0
6294	6294	6273	6294	0
6295	6295	6272	6295	0
6296	6296	6271	6296	0
6297	6297	6270	6297	0
6298	6298	6269	6298	0
6300	6300	6267	6300	0
6302	6302	6266	6302	0
6303	6303	6265	6303	0
6304	6304	6264	6304	0
6305	6305	6263	6305	0
6306	6306	6262	6306	0
6326	6326	6345	6326	0
6327	6327	6344	6327	0
6328	6328	6343	6328	0
6329	6329	6342	6329	0
6330	6330	6341	6330	0
6331	6331	6340	6331	0
6332	6332	6339	6332	0
6333	6333	6338	6333	0
6338	6338	6333	6338	0
6339	6339	6332	6339	0
6340	6340	6331	6340	0
6341	6341	6330	6341	0
6342	6342	6329	6342	0
6343	6343	6328	6343	0
6344	6344	6327	6344	0
6345	6345	6326	6345	0
6353	6353	6360	6353	0
6354	6354	6359	6354	0
6359	6359	6354	6359	0
6360	6360	6353	6360	0
6617	6617	6628	6617	0
6618	6618	6627	6618	0
6619	6619	6626	6619	0
6620	6620	6625	6620	0
6625	6625	6620	6625	0
6626	6626	6619	6626	0
6627	6627	6618	6627	0
6628	6628	6617	6628	0
6789	6789	6836	6789	0
6790	6790	6835	6790	0
6835	6835	6790	6835	0
6836	6836	6789	6836	0
7042	7042	7072	7042	0
7043	7043	7071	7043	0
7044	7044	7070	7044	0
7045	7045	7069	7045	0
7046	7046	7068	7046	0
7047	7047	7067	7047	0
7048	7048	7066	7048	0
7051	7051	7065	7051	0
7052	7052	7064	7052	0
7053	7053	7063	7053	0
7054	7054	7062	7054	0
7055	7055	7061	7055	0
7061	7061	7055	7061	0
7062	7062	7054	7062	0
7063	7063	7053	7063	0
7064	7064	7052	7064	0
7065	7065	7051	7065	0
7066	7066	7048	7066	0
7067	7067	7047	7067	0
7068	7068	7046	7068	0
7069	7069	7045	7069	0
7070	7070	7044	7070	0
7071	7071	7043	7071	0
7072	7072	7042	7072	0
7463	7463	7518	7463	0
7464	7464	7517	7464	0
7517	7517	7464	7517	0
7518	7518	7463	7518	0
7718	7718	7793	7718	0
7719	7719	7792	7719	0
7720	7720	7791	7720	0
7722	7722	7789	7722	0
7723	7723	7788	7723	0
7744	7744	7784	7744	0
7745	7745	7783	7745	0
7746	7746	7782	7746	0
7747	7747	7781	7747	0
7748	7748	7780	7748	0
7750	7750	7778	7750	0
7751	7751	7777	7751	0
7752	7752	7776	7752	0
7753	7753	7775	7753	0
7754	7754	7774	7754	0
7755	7755	7773	7755	0
7756	7756	7772	7756	0
7757	7757	7771	7757	0
7759	7759	7770	7759	0
7760	7760	7769	7760	0
7761	7761	7768	7761	0
7768	7768	7761	7768	0
7769	7769	7760	7769	0
7770	7770	7759	7770	0
7771	7771	7757	7771	0
7772	7772	7756	7772	0
7773	7773	7755	7773	0
7774	7774	7754	7774	0
7775	7775	7753	7775	0
7776	7776	7752	7776	0
7777	7777	7751	7777	0
7778	7778	7750	7778	0
[truncated: 1,296 more rows]

## Sheet: HIV SF1 -1 mono-di CT Compare
Reference File= HIV-1_SF1_100_mono_-1.ct						Reference File= HIV-1_SF1_1000_mono_-1.ct						Reference File= HIV-1_SF1_10000_mono_-1.ct						Reference File= HIV-1_SF1_100_mono_-1.ct						Reference File= HIV-1_SF1_1000_mono_-1.ct						Reference File= HIV-1_SF1_100_mono_-1.ct
[truncated: 646 more rows]

[truncated: 37 more sheets: HIV SF1 NoFilt mono-di CT Comp, HIV_SF1_di_SF2_di_-2 CT Comp, HIV_SF1_di_SF2_di_-1 CT Comp, HIV_SF1_di_SF2_di_NoFilter CT, HIV-1 SF1 Mono-Di, HIV-1 SF2 Mono-Di, Zika Mono CT Comparison, Zika Di CT Comparison, Zika SF1 -2 CT Comparison, Zika SF1 -1 CT Comparison, Zika SF1 NoFilter CT Compare, Zika SF1 -2 mono-di CT Compare, Zika SF1 -1 mono-di CT Compare, Zika SF1 NoFilt mono-di CT Comp, Zika_SF1_di_SF2_di_-2 CT Comp, Zika_SF1_di_SF2_di_-1 CT Comp, Zika_SF1_di_SF2_di_NoFilter CT, Zika_SF1_Mono-Di, Zika SF2_Mono-Di, SARS Mono CT Comparison …]
