# Supplementary material for: ScanFold 2.0: a rapid approach for identifying potential structured RNA targets in genomes and transcriptomes
Source: PeerJ. 2022 Nov 8;10:e14361. doi: 10.7717/peerj.14361 (PMC9651051; doi:10.7717/peerj.14361)
Supplement: Supplemental Information 3 — The results of the ROC analysis displayed in Figure 2. This includes all tpr, fpr, and AUC calculations for every dataset and all SF1 and 2 conditions used. Both of the ROC curve plots can also be found at the end of the document. [file peerj-10-14361-s003.xlsx]

## Sheet: Commands
Lowest to Highest Constraint Script					tpr_fpr Script								Output Name Generation
python	Lowest_to_highest_percent_react_to_constraint_SHAPE.py	Incarnato_SHAPE_SARS2_in_vitro_Reactivity.txt	0		python	tpr_fpr.py	SARS_SF2_Di_-1.ct	Sun_Reactivities_top_0_percent_constrained.DBN	>>	SF2_Di_Sun_SHAPE_tpr_fpr.txt			tpr_fpr_	Sun_Reactivities_top_	0	_percent_constrained.DBN	_percent_constrained.txt
python	Lowest_to_highest_percent_react_to_constraint_SHAPE.py	Incarnato_SHAPE_SARS2_in_vitro_Reactivity.txt	1		python	tpr_fpr.py	SARS_SF2_Di_-1.ct	Sun_Reactivities_top_1_percent_constrained.DBN	>>	SF2_Di_Sun_SHAPE_tpr_fpr.txt			tpr_fpr_	Sun_Reactivities_top_	1	_percent_constrained.DBN	_percent_constrained.txt
python	Lowest_to_highest_percent_react_to_constraint_SHAPE.py	Incarnato_SHAPE_SARS2_in_vitro_Reactivity.txt	2		python	tpr_fpr.py	SARS_SF2_Di_-1.ct	Sun_Reactivities_top_2_percent_constrained.DBN	>>	SF2_Di_Sun_SHAPE_tpr_fpr.txt			tpr_fpr_	Sun_Reactivities_top_	2	_percent_constrained.DBN	_percent_constrained.txt
python	Lowest_to_highest_percent_react_to_constraint_SHAPE.py	Incarnato_SHAPE_SARS2_in_vitro_Reactivity.txt	3		python	tpr_fpr.py	SARS_SF2_Di_-1.ct	Sun_Reactivities_top_3_percent_constrained.DBN	>>	SF2_Di_Sun_SHAPE_tpr_fpr.txt			tpr_fpr_	Sun_Reactivities_top_	3	_percent_constrained.DBN	_percent_constrained.txt
python	Lowest_to_highest_percent_react_to_constraint_SHAPE.py	Incarnato_SHAPE_SARS2_in_vitro_Reactivity.txt	4		python	tpr_fpr.py	SARS_SF2_Di_-1.ct	Sun_Reactivities_top_4_percent_constrained.DBN	>>	SF2_Di_Sun_SHAPE_tpr_fpr.txt			tpr_fpr_	Sun_Reactivities_top_	4	_percent_constrained.DBN	_percent_constrained.txt
python	Lowest_to_highest_percent_react_to_constraint_SHAPE.py	Incarnato_SHAPE_SARS2_in_vitro_Reactivity.txt	5		python	tpr_fpr.py	SARS_SF2_Di_-1.ct	Sun_Reactivities_top_5_percent_constrained.DBN	>>	SF2_Di_Sun_SHAPE_tpr_fpr.txt			tpr_fpr_	Sun_Reactivities_top_	5	_percent_constrained.DBN	_percent_constrained.txt
python	Lowest_to_highest_percent_react_to_constraint_SHAPE.py	Incarnato_SHAPE_SARS2_in_vitro_Reactivity.txt	6		python	tpr_fpr.py	SARS_SF2_Di_-1.ct	Sun_Reactivities_top_6_percent_constrained.DBN	>>	SF2_Di_Sun_SHAPE_tpr_fpr.txt			tpr_fpr_	Sun_Reactivities_top_	6	_percent_constrained.DBN	_percent_constrained.txt
python	Lowest_to_highest_percent_react_to_constraint_SHAPE.py	Incarnato_SHAPE_SARS2_in_vitro_Reactivity.txt	7		python	tpr_fpr.py	SARS_SF2_Di_-1.ct	Sun_Reactivities_top_7_percent_constrained.DBN	>>	SF2_Di_Sun_SHAPE_tpr_fpr.txt			tpr_fpr_	Sun_Reactivities_top_	7	_percent_constrained.DBN	_percent_constrained.txt
python	Lowest_to_highest_percent_react_to_constraint_SHAPE.py	Incarnato_SHAPE_SARS2_in_vitro_Reactivity.txt	8		python	tpr_fpr.py	SARS_SF2_Di_-1.ct	Sun_Reactivities_top_8_percent_constrained.DBN	>>	SF2_Di_Sun_SHAPE_tpr_fpr.txt			tpr_fpr_	Sun_Reactivities_top_	8	_percent_constrained.DBN	_percent_constrained.txt
python	Lowest_to_highest_percent_react_to_constraint_SHAPE.py	Incarnato_SHAPE_SARS2_in_vitro_Reactivity.txt	9		python	tpr_fpr.py	SARS_SF2_Di_-1.ct	Sun_Reactivities_top_9_percent_constrained.DBN	>>	SF2_Di_Sun_SHAPE_tpr_fpr.txt			tpr_fpr_	Sun_Reactivities_top_	9	_percent_constrained.DBN	_percent_constrained.txt
python	Lowest_to_highest_percent_react_to_constraint_SHAPE.py	Incarnato_SHAPE_SARS2_in_vitro_Reactivity.txt	10		python	tpr_fpr.py	SARS_SF2_Di_-1.ct	Sun_Reactivities_top_10_percent_constrained.DBN	>>	SF2_Di_Sun_SHAPE_tpr_fpr.txt			tpr_fpr_	Sun_Reactivities_top_	10	_percent_constrained.DBN	_percent_constrained.txt
python	Lowest_to_highest_percent_react_to_constraint_SHAPE.py	Incarnato_SHAPE_SARS2_in_vitro_Reactivity.txt	11		python	tpr_fpr.py	SARS_SF2_Di_-1.ct	Sun_Reactivities_top_11_percent_constrained.DBN	>>	SF2_Di_Sun_SHAPE_tpr_fpr.txt			tpr_fpr_	Sun_Reactivities_top_	11	_percent_constrained.DBN	_percent_constrained.txt
python	Lowest_to_highest_percent_react_to_constraint_SHAPE.py	Incarnato_SHAPE_SARS2_in_vitro_Reactivity.txt	12		python	tpr_fpr.py	SARS_SF2_Di_-1.ct	Sun_Reactivities_top_12_percent_constrained.DBN	>>	SF2_Di_Sun_SHAPE_tpr_fpr.txt			tpr_fpr_	Sun_Reactivities_top_	12	_percent_constrained.DBN	_percent_constrained.txt
python	Lowest_to_highest_percent_react_to_constraint_SHAPE.py	Incarnato_SHAPE_SARS2_in_vitro_Reactivity.txt	13		python	tpr_fpr.py	SARS_SF2_Di_-1.ct	Sun_Reactivities_top_13_percent_constrained.DBN	>>	SF2_Di_Sun_SHAPE_tpr_fpr.txt			tpr_fpr_	Sun_Reactivities_top_	13	_percent_constrained.DBN	_percent_constrained.txt
python	Lowest_to_highest_percent_react_to_constraint_SHAPE.py	Incarnato_SHAPE_SARS2_in_vitro_Reactivity.txt	14		python	tpr_fpr.py	SARS_SF2_Di_-1.ct	Sun_Reactivities_top_14_percent_constrained.DBN	>>	SF2_Di_Sun_SHAPE_tpr_fpr.txt			tpr_fpr_	Sun_Reactivities_top_	14	_percent_constrained.DBN	_percent_constrained.txt
python	Lowest_to_highest_percent_react_to_constraint_SHAPE.py	Incarnato_SHAPE_SARS2_in_vitro_Reactivity.txt	15		python	tpr_fpr.py	SARS_SF2_Di_-1.ct	Sun_Reactivities_top_15_percent_constrained.DBN	>>	SF2_Di_Sun_SHAPE_tpr_fpr.txt			tpr_fpr_	Sun_Reactivities_top_	15	_percent_constrained.DBN	_percent_constrained.txt
python	Lowest_to_highest_percent_react_to_constraint_SHAPE.py	Incarnato_SHAPE_SARS2_in_vitro_Reactivity.txt	16		python	tpr_fpr.py	SARS_SF2_Di_-1.ct	Sun_Reactivities_top_16_percent_constrained.DBN	>>	SF2_Di_Sun_SHAPE_tpr_fpr.txt			tpr_fpr_	Sun_Reactivities_top_	16	_percent_constrained.DBN	_percent_constrained.txt
python	Lowest_to_highest_percent_react_to_constraint_SHAPE.py	Incarnato_SHAPE_SARS2_in_vitro_Reactivity.txt	17		python	tpr_fpr.py	SARS_SF2_Di_-1.ct	Sun_Reactivities_top_17_percent_constrained.DBN	>>	SF2_Di_Sun_SHAPE_tpr_fpr.txt			tpr_fpr_	Sun_Reactivities_top_	17	_percent_constrained.DBN	_percent_constrained.txt
python	Lowest_to_highest_percent_react_to_constraint_SHAPE.py	Incarnato_SHAPE_SARS2_in_vitro_Reactivity.txt	18		python	tpr_fpr.py	SARS_SF2_Di_-1.ct	Sun_Reactivities_top_18_percent_constrained.DBN	>>	SF2_Di_Sun_SHAPE_tpr_fpr.txt			tpr_fpr_	Sun_Reactivities_top_	18	_percent_constrained.DBN	_percent_constrained.txt
python	Lowest_to_highest_percent_react_to_constraint_SHAPE.py	Incarnato_SHAPE_SARS2_in_vitro_Reactivity.txt	19		python	tpr_fpr.py	SARS_SF2_Di_-1.ct	Sun_Reactivities_top_19_percent_constrained.DBN	>>	SF2_Di_Sun_SHAPE_tpr_fpr.txt			tpr_fpr_	Sun_Reactivities_top_	19	_percent_constrained.DBN	_percent_constrained.txt
python	Lowest_to_highest_percent_react_to_constraint_SHAPE.py	Incarnato_SHAPE_SARS2_in_vitro_Reactivity.txt	20		python	tpr_fpr.py	SARS_SF2_Di_-1.ct	Sun_Reactivities_top_20_percent_constrained.DBN	>>	SF2_Di_Sun_SHAPE_tpr_fpr.txt			tpr_fpr_	Sun_Reactivities_top_	20	_percent_constrained.DBN	_percent_constrained.txt
python	Lowest_to_highest_percent_react_to_constraint_SHAPE.py	Incarnato_SHAPE_SARS2_in_vitro_Reactivity.txt	21		python	tpr_fpr.py	SARS_SF2_Di_-1.ct	Sun_Reactivities_top_21_percent_constrained.DBN	>>	SF2_Di_Sun_SHAPE_tpr_fpr.txt			tpr_fpr_	Sun_Reactivities_top_	21	_percent_constrained.DBN	_percent_constrained.txt
python	Lowest_to_highest_percent_react_to_constraint_SHAPE.py	Incarnato_SHAPE_SARS2_in_vitro_Reactivity.txt	22		python	tpr_fpr.py	SARS_SF2_Di_-1.ct	Sun_Reactivities_top_22_percent_constrained.DBN	>>	SF2_Di_Sun_SHAPE_tpr_fpr.txt			tpr_fpr_	Sun_Reactivities_top_	22	_percent_constrained.DBN	_percent_constrained.txt
python	Lowest_to_highest_percent_react_to_constraint_SHAPE.py	Incarnato_SHAPE_SARS2_in_vitro_Reactivity.txt	23		python	tpr_fpr.py	SARS_SF2_Di_-1.ct	Sun_Reactivities_top_23_percent_constrained.DBN	>>	SF2_Di_Sun_SHAPE_tpr_fpr.txt			tpr_fpr_	Sun_Reactivities_top_	23	_percent_constrained.DBN	_percent_constrained.txt
python	Lowest_to_highest_percent_react_to_constraint_SHAPE.py	Incarnato_SHAPE_SARS2_in_vitro_Reactivity.txt	24		python	tpr_fpr.py	SARS_SF2_Di_-1.ct	Sun_Reactivities_top_24_percent_constrained.DBN	>>	SF2_Di_Sun_SHAPE_tpr_fpr.txt			tpr_fpr_	Sun_Reactivities_top_	24	_percent_constrained.DBN	_percent_constrained.txt
python	Lowest_to_highest_percent_react_to_constraint_SHAPE.py	Incarnato_SHAPE_SARS2_in_vitro_Reactivity.txt	25		python	tpr_fpr.py	SARS_SF2_Di_-1.ct	Sun_Reactivities_top_25_percent_constrained.DBN	>>	SF2_Di_Sun_SHAPE_tpr_fpr.txt			tpr_fpr_	Sun_Reactivities_top_	25	_percent_constrained.DBN	_percent_constrained.txt
python	Lowest_to_highest_percent_react_to_constraint_SHAPE.py	Incarnato_SHAPE_SARS2_in_vitro_Reactivity.txt	26		python	tpr_fpr.py	SARS_SF2_Di_-1.ct	Sun_Reactivities_top_26_percent_constrained.DBN	>>	SF2_Di_Sun_SHAPE_tpr_fpr.txt			tpr_fpr_	Sun_Reactivities_top_	26	_percent_constrained.DBN	_percent_constrained.txt
python	Lowest_to_highest_percent_react_to_constraint_SHAPE.py	Incarnato_SHAPE_SARS2_in_vitro_Reactivity.txt	27		python	tpr_fpr.py	SARS_SF2_Di_-1.ct	Sun_Reactivities_top_27_percent_constrained.DBN	>>	SF2_Di_Sun_SHAPE_tpr_fpr.txt			tpr_fpr_	Sun_Reactivities_top_	27	_percent_constrained.DBN	_percent_constrained.txt
python	Lowest_to_highest_percent_react_to_constraint_SHAPE.py	Incarnato_SHAPE_SARS2_in_vitro_Reactivity.txt	28		python	tpr_fpr.py	SARS_SF2_Di_-1.ct	Sun_Reactivities_top_28_percent_constrained.DBN	>>	SF2_Di_Sun_SHAPE_tpr_fpr.txt			tpr_fpr_	Sun_Reactivities_top_	28	_percent_constrained.DBN	_percent_constrained.txt
python	Lowest_to_highest_percent_react_to_constraint_SHAPE.py	Incarnato_SHAPE_SARS2_in_vitro_Reactivity.txt	29		python	tpr_fpr.py	SARS_SF2_Di_-1.ct	Sun_Reactivities_top_29_percent_constrained.DBN	>>	SF2_Di_Sun_SHAPE_tpr_fpr.txt			tpr_fpr_	Sun_Reactivities_top_	29	_percent_constrained.DBN	_percent_constrained.txt
python	Lowest_to_highest_percent_react_to_constraint_SHAPE.py	Incarnato_SHAPE_SARS2_in_vitro_Reactivity.txt	30		python	tpr_fpr.py	SARS_SF2_Di_-1.ct	Sun_Reactivities_top_30_percent_constrained.DBN	>>	SF2_Di_Sun_SHAPE_tpr_fpr.txt			tpr_fpr_	Sun_Reactivities_top_	30	_percent_constrained.DBN	_percent_constrained.txt
python	Lowest_to_highest_percent_react_to_constraint_SHAPE.py	Incarnato_SHAPE_SARS2_in_vitro_Reactivity.txt	31		python	tpr_fpr.py	SARS_SF2_Di_-1.ct	Sun_Reactivities_top_31_percent_constrained.DBN	>>	SF2_Di_Sun_SHAPE_tpr_fpr.txt			tpr_fpr_	Sun_Reactivities_top_	31	_percent_constrained.DBN	_percent_constrained.txt
python	Lowest_to_highest_percent_react_to_constraint_SHAPE.py	Incarnato_SHAPE_SARS2_in_vitro_Reactivity.txt	32		python	tpr_fpr.py	SARS_SF2_Di_-1.ct	Sun_Reactivities_top_32_percent_constrained.DBN	>>	SF2_Di_Sun_SHAPE_tpr_fpr.txt			tpr_fpr_	Sun_Reactivities_top_	32	_percent_constrained.DBN	_percent_constrained.txt
python	Lowest_to_highest_percent_react_to_constraint_SHAPE.py	Incarnato_SHAPE_SARS2_in_vitro_Reactivity.txt	33		python	tpr_fpr.py	SARS_SF2_Di_-1.ct	Sun_Reactivities_top_33_percent_constrained.DBN	>>	SF2_Di_Sun_SHAPE_tpr_fpr.txt			tpr_fpr_	Sun_Reactivities_top_	33	_percent_constrained.DBN	_percent_constrained.txt
python	Lowest_to_highest_percent_react_to_constraint_SHAPE.py	Incarnato_SHAPE_SARS2_in_vitro_Reactivity.txt	34		python	tpr_fpr.py	SARS_SF2_Di_-1.ct	Sun_Reactivities_top_34_percent_constrained.DBN	>>	SF2_Di_Sun_SHAPE_tpr_fpr.txt			tpr_fpr_	Sun_Reactivities_top_	34	_percent_constrained.DBN	_percent_constrained.txt
python	Lowest_to_highest_percent_react_to_constraint_SHAPE.py	Incarnato_SHAPE_SARS2_in_vitro_Reactivity.txt	35		python	tpr_fpr.py	SARS_SF2_Di_-1.ct	Sun_Reactivities_top_35_percent_constrained.DBN	>>	SF2_Di_Sun_SHAPE_tpr_fpr.txt			tpr_fpr_	Sun_Reactivities_top_	35	_percent_constrained.DBN	_percent_constrained.txt
python	Lowest_to_highest_percent_react_to_constraint_SHAPE.py	Incarnato_SHAPE_SARS2_in_vitro_Reactivity.txt	36		python	tpr_fpr.py	SARS_SF2_Di_-1.ct	Sun_Reactivities_top_36_percent_constrained.DBN	>>	SF2_Di_Sun_SHAPE_tpr_fpr.txt			tpr_fpr_	Sun_Reactivities_top_	36	_percent_constrained.DBN	_percent_constrained.txt
python	Lowest_to_highest_percent_react_to_constraint_SHAPE.py	Incarnato_SHAPE_SARS2_in_vitro_Reactivity.txt	37		python	tpr_fpr.py	SARS_SF2_Di_-1.ct	Sun_Reactivities_top_37_percent_constrained.DBN	>>	SF2_Di_Sun_SHAPE_tpr_fpr.txt			tpr_fpr_	Sun_Reactivities_top_	37	_percent_constrained.DBN	_percent_constrained.txt
python	Lowest_to_highest_percent_react_to_constraint_SHAPE.py	Incarnato_SHAPE_SARS2_in_vitro_Reactivity.txt	38		python	tpr_fpr.py	SARS_SF2_Di_-1.ct	Sun_Reactivities_top_38_percent_constrained.DBN	>>	SF2_Di_Sun_SHAPE_tpr_fpr.txt			tpr_fpr_	Sun_Reactivities_top_	38	_percent_constrained.DBN	_percent_constrained.txt
python	Lowest_to_highest_percent_react_to_constraint_SHAPE.py	Incarnato_SHAPE_SARS2_in_vitro_Reactivity.txt	39		python	tpr_fpr.py	SARS_SF2_Di_-1.ct	Sun_Reactivities_top_39_percent_constrained.DBN	>>	SF2_Di_Sun_SHAPE_tpr_fpr.txt			tpr_fpr_	Sun_Reactivities_top_	39	_percent_constrained.DBN	_percent_constrained.txt
python	Lowest_to_highest_percent_react_to_constraint_SHAPE.py	Incarnato_SHAPE_SARS2_in_vitro_Reactivity.txt	40		python	tpr_fpr.py	SARS_SF2_Di_-1.ct	Sun_Reactivities_top_40_percent_constrained.DBN	>>	SF2_Di_Sun_SHAPE_tpr_fpr.txt			tpr_fpr_	Sun_Reactivities_top_	40	_percent_constrained.DBN	_percent_constrained.txt
python	Lowest_to_highest_percent_react_to_constraint_SHAPE.py	Incarnato_SHAPE_SARS2_in_vitro_Reactivity.txt	41		python	tpr_fpr.py	SARS_SF2_Di_-1.ct	Sun_Reactivities_top_41_percent_constrained.DBN	>>	SF2_Di_Sun_SHAPE_tpr_fpr.txt			tpr_fpr_	Sun_Reactivities_top_	41	_percent_constrained.DBN	_percent_constrained.txt
python	Lowest_to_highest_percent_react_to_constraint_SHAPE.py	Incarnato_SHAPE_SARS2_in_vitro_Reactivity.txt	42		python	tpr_fpr.py	SARS_SF2_Di_-1.ct	Sun_Reactivities_top_42_percent_constrained.DBN	>>	SF2_Di_Sun_SHAPE_tpr_fpr.txt			tpr_fpr_	Sun_Reactivities_top_	42	_percent_constrained.DBN	_percent_constrained.txt
python	Lowest_to_highest_percent_react_to_constraint_SHAPE.py	Incarnato_SHAPE_SARS2_in_vitro_Reactivity.txt	43		python	tpr_fpr.py	SARS_SF2_Di_-1.ct	Sun_Reactivities_top_43_percent_constrained.DBN	>>	SF2_Di_Sun_SHAPE_tpr_fpr.txt			tpr_fpr_	Sun_Reactivities_top_	43	_percent_constrained.DBN	_percent_constrained.txt
python	Lowest_to_highest_percent_react_to_constraint_SHAPE.py	Incarnato_SHAPE_SARS2_in_vitro_Reactivity.txt	44		python	tpr_fpr.py	SARS_SF2_Di_-1.ct	Sun_Reactivities_top_44_percent_constrained.DBN	>>	SF2_Di_Sun_SHAPE_tpr_fpr.txt			tpr_fpr_	Sun_Reactivities_top_	44	_percent_constrained.DBN	_percent_constrained.txt
python	Lowest_to_highest_percent_react_to_constraint_SHAPE.py	Incarnato_SHAPE_SARS2_in_vitro_Reactivity.txt	45		python	tpr_fpr.py	SARS_SF2_Di_-1.ct	Sun_Reactivities_top_45_percent_constrained.DBN	>>	SF2_Di_Sun_SHAPE_tpr_fpr.txt			tpr_fpr_	Sun_Reactivities_top_	45	_percent_constrained.DBN	_percent_constrained.txt
python	Lowest_to_highest_percent_react_to_constraint_SHAPE.py	Incarnato_SHAPE_SARS2_in_vitro_Reactivity.txt	46		python	tpr_fpr.py	SARS_SF2_Di_-1.ct	Sun_Reactivities_top_46_percent_constrained.DBN	>>	SF2_Di_Sun_SHAPE_tpr_fpr.txt			tpr_fpr_	Sun_Reactivities_top_	46	_percent_constrained.DBN	_percent_constrained.txt
python	Lowest_to_highest_percent_react_to_constraint_SHAPE.py	Incarnato_SHAPE_SARS2_in_vitro_Reactivity.txt	47		python	tpr_fpr.py	SARS_SF2_Di_-1.ct	Sun_Reactivities_top_47_percent_constrained.DBN	>>	SF2_Di_Sun_SHAPE_tpr_fpr.txt			tpr_fpr_	Sun_Reactivities_top_	47	_percent_constrained.DBN	_percent_constrained.txt
python	Lowest_to_highest_percent_react_to_constraint_SHAPE.py	Incarnato_SHAPE_SARS2_in_vitro_Reactivity.txt	48		python	tpr_fpr.py	SARS_SF2_Di_-1.ct	Sun_Reactivities_top_48_percent_constrained.DBN	>>	SF2_Di_Sun_SHAPE_tpr_fpr.txt			tpr_fpr_	Sun_Reactivities_top_	48	_percent_constrained.DBN	_percent_constrained.txt
python	Lowest_to_highest_percent_react_to_constraint_SHAPE.py	Incarnato_SHAPE_SARS2_in_vitro_Reactivity.txt	49		python	tpr_fpr.py	SARS_SF2_Di_-1.ct	Sun_Reactivities_top_49_percent_constrained.DBN	>>	SF2_Di_Sun_SHAPE_tpr_fpr.txt			tpr_fpr_	Sun_Reactivities_top_	49	_percent_constrained.DBN	_percent_constrained.txt
python	Lowest_to_highest_percent_react_to_constraint_SHAPE.py	Incarnato_SHAPE_SARS2_in_vitro_Reactivity.txt	50		python	tpr_fpr.py	SARS_SF2_Di_-1.ct	Sun_Reactivities_top_50_percent_constrained.DBN	>>	SF2_Di_Sun_SHAPE_tpr_fpr.txt			tpr_fpr_	Sun_Reactivities_top_	50	_percent_constrained.DBN	_percent_constrained.txt
python	Lowest_to_highest_percent_react_to_constraint_SHAPE.py	Incarnato_SHAPE_SARS2_in_vitro_Reactivity.txt	51		python	tpr_fpr.py	SARS_SF2_Di_-1.ct	Sun_Reactivities_top_51_percent_constrained.DBN	>>	SF2_Di_Sun_SHAPE_tpr_fpr.txt			tpr_fpr_	Sun_Reactivities_top_	51	_percent_constrained.DBN	_percent_constrained.txt
python	Lowest_to_highest_percent_react_to_constraint_SHAPE.py	Incarnato_SHAPE_SARS2_in_vitro_Reactivity.txt	52		python	tpr_fpr.py	SARS_SF2_Di_-1.ct	Sun_Reactivities_top_52_percent_constrained.DBN	>>	SF2_Di_Sun_SHAPE_tpr_fpr.txt			tpr_fpr_	Sun_Reactivities_top_	52	_percent_constrained.DBN	_percent_constrained.txt
python	Lowest_to_highest_percent_react_to_constraint_SHAPE.py	Incarnato_SHAPE_SARS2_in_vitro_Reactivity.txt	53		python	tpr_fpr.py	SARS_SF2_Di_-1.ct	Sun_Reactivities_top_53_percent_constrained.DBN	>>	SF2_Di_Sun_SHAPE_tpr_fpr.txt			tpr_fpr_	Sun_Reactivities_top_	53	_percent_constrained.DBN	_percent_constrained.txt
python	Lowest_to_highest_percent_react_to_constraint_SHAPE.py	Incarnato_SHAPE_SARS2_in_vitro_Reactivity.txt	54		python	tpr_fpr.py	SARS_SF2_Di_-1.ct	Sun_Reactivities_top_54_percent_constrained.DBN	>>	SF2_Di_Sun_SHAPE_tpr_fpr.txt			tpr_fpr_	Sun_Reactivities_top_	54	_percent_constrained.DBN	_percent_constrained.txt
python	Lowest_to_highest_percent_react_to_constraint_SHAPE.py	Incarnato_SHAPE_SARS2_in_vitro_Reactivity.txt	55		python	tpr_fpr.py	SARS_SF2_Di_-1.ct	Sun_Reactivities_top_55_percent_constrained.DBN	>>	SF2_Di_Sun_SHAPE_tpr_fpr.txt			tpr_fpr_	Sun_Reactivities_top_	55	_percent_constrained.DBN	_percent_constrained.txt
python	Lowest_to_highest_percent_react_to_constraint_SHAPE.py	Incarnato_SHAPE_SARS2_in_vitro_Reactivity.txt	56		python	tpr_fpr.py	SARS_SF2_Di_-1.ct	Sun_Reactivities_top_56_percent_constrained.DBN	>>	SF2_Di_Sun_SHAPE_tpr_fpr.txt			tpr_fpr_	Sun_Reactivities_top_	56	_percent_constrained.DBN	_percent_constrained.txt
python	Lowest_to_highest_percent_react_to_constraint_SHAPE.py	Incarnato_SHAPE_SARS2_in_vitro_Reactivity.txt	57		python	tpr_fpr.py	SARS_SF2_Di_-1.ct	Sun_Reactivities_top_57_percent_constrained.DBN	>>	SF2_Di_Sun_SHAPE_tpr_fpr.txt			tpr_fpr_	Sun_Reactivities_top_	57	_percent_constrained.DBN	_percent_constrained.txt
python	Lowest_to_highest_percent_react_to_constraint_SHAPE.py	Incarnato_SHAPE_SARS2_in_vitro_Reactivity.txt	58		python	tpr_fpr.py	SARS_SF2_Di_-1.ct	Sun_Reactivities_top_58_percent_constrained.DBN	>>	SF2_Di_Sun_SHAPE_tpr_fpr.txt			tpr_fpr_	Sun_Reactivities_top_	58	_percent_constrained.DBN	_percent_constrained.txt
python	Lowest_to_highest_percent_react_to_constraint_SHAPE.py	Incarnato_SHAPE_SARS2_in_vitro_Reactivity.txt	59		python	tpr_fpr.py	SARS_SF2_Di_-1.ct	Sun_Reactivities_top_59_percent_constrained.DBN	>>	SF2_Di_Sun_SHAPE_tpr_fpr.txt			tpr_fpr_	Sun_Reactivities_top_	59	_percent_constrained.DBN	_percent_constrained.txt
python	Lowest_to_highest_percent_react_to_constraint_SHAPE.py	Incarnato_SHAPE_SARS2_in_vitro_Reactivity.txt	60		python	tpr_fpr.py	SARS_SF2_Di_-1.ct	Sun_Reactivities_top_60_percent_constrained.DBN	>>	SF2_Di_Sun_SHAPE_tpr_fpr.txt			tpr_fpr_	Sun_Reactivities_top_	60	_percent_constrained.DBN	_percent_constrained.txt
python	Lowest_to_highest_percent_react_to_constraint_SHAPE.py	Incarnato_SHAPE_SARS2_in_vitro_Reactivity.txt	61		python	tpr_fpr.py	SARS_SF2_Di_-1.ct	Sun_Reactivities_top_61_percent_constrained.DBN	>>	SF2_Di_Sun_SHAPE_tpr_fpr.txt			tpr_fpr_	Sun_Reactivities_top_	61	_percent_constrained.DBN	_percent_constrained.txt
python	Lowest_to_highest_percent_react_to_constraint_SHAPE.py	Incarnato_SHAPE_SARS2_in_vitro_Reactivity.txt	62		python	tpr_fpr.py	SARS_SF2_Di_-1.ct	Sun_Reactivities_top_62_percent_constrained.DBN	>>	SF2_Di_Sun_SHAPE_tpr_fpr.txt			tpr_fpr_	Sun_Reactivities_top_	62	_percent_constrained.DBN	_percent_constrained.txt
python	Lowest_to_highest_percent_react_to_constraint_SHAPE.py	Incarnato_SHAPE_SARS2_in_vitro_Reactivity.txt	63		python	tpr_fpr.py	SARS_SF2_Di_-1.ct	Sun_Reactivities_top_63_percent_constrained.DBN	>>	SF2_Di_Sun_SHAPE_tpr_fpr.txt			tpr_fpr_	Sun_Reactivities_top_	63	_percent_constrained.DBN	_percent_constrained.txt
python	Lowest_to_highest_percent_react_to_constraint_SHAPE.py	Incarnato_SHAPE_SARS2_in_vitro_Reactivity.txt	64		python	tpr_fpr.py	SARS_SF2_Di_-1.ct	Sun_Reactivities_top_64_percent_constrained.DBN	>>	SF2_Di_Sun_SHAPE_tpr_fpr.txt			tpr_fpr_	Sun_Reactivities_top_	64	_percent_constrained.DBN	_percent_constrained.txt
python	Lowest_to_highest_percent_react_to_constraint_SHAPE.py	Incarnato_SHAPE_SARS2_in_vitro_Reactivity.txt	65		python	tpr_fpr.py	SARS_SF2_Di_-1.ct	Sun_Reactivities_top_65_percent_constrained.DBN	>>	SF2_Di_Sun_SHAPE_tpr_fpr.txt			tpr_fpr_	Sun_Reactivities_top_	65	_percent_constrained.DBN	_percent_constrained.txt
python	Lowest_to_highest_percent_react_to_constraint_SHAPE.py	Incarnato_SHAPE_SARS2_in_vitro_Reactivity.txt	66		python	tpr_fpr.py	SARS_SF2_Di_-1.ct	Sun_Reactivities_top_66_percent_constrained.DBN	>>	SF2_Di_Sun_SHAPE_tpr_fpr.txt			tpr_fpr_	Sun_Reactivities_top_	66	_percent_constrained.DBN	_percent_constrained.txt
python	Lowest_to_highest_percent_react_to_constraint_SHAPE.py	Incarnato_SHAPE_SARS2_in_vitro_Reactivity.txt	67		python	tpr_fpr.py	SARS_SF2_Di_-1.ct	Sun_Reactivities_top_67_percent_constrained.DBN	>>	SF2_Di_Sun_SHAPE_tpr_fpr.txt			tpr_fpr_	Sun_Reactivities_top_	67	_percent_constrained.DBN	_percent_constrained.txt
python	Lowest_to_highest_percent_react_to_constraint_SHAPE.py	Incarnato_SHAPE_SARS2_in_vitro_Reactivity.txt	68		python	tpr_fpr.py	SARS_SF2_Di_-1.ct	Sun_Reactivities_top_68_percent_constrained.DBN	>>	SF2_Di_Sun_SHAPE_tpr_fpr.txt			tpr_fpr_	Sun_Reactivities_top_	68	_percent_constrained.DBN	_percent_constrained.txt
python	Lowest_to_highest_percent_react_to_constraint_SHAPE.py	Incarnato_SHAPE_SARS2_in_vitro_Reactivity.txt	69		python	tpr_fpr.py	SARS_SF2_Di_-1.ct	Sun_Reactivities_top_69_percent_constrained.DBN	>>	SF2_Di_Sun_SHAPE_tpr_fpr.txt			tpr_fpr_	Sun_Reactivities_top_	69	_percent_constrained.DBN	_percent_constrained.txt
python	Lowest_to_highest_percent_react_to_constraint_SHAPE.py	Incarnato_SHAPE_SARS2_in_vitro_Reactivity.txt	70		python	tpr_fpr.py	SARS_SF2_Di_-1.ct	Sun_Reactivities_top_70_percent_constrained.DBN	>>	SF2_Di_Sun_SHAPE_tpr_fpr.txt			tpr_fpr_	Sun_Reactivities_top_	70	_percent_constrained.DBN	_percent_constrained.txt
python	Lowest_to_highest_percent_react_to_constraint_SHAPE.py	Incarnato_SHAPE_SARS2_in_vitro_Reactivity.txt	71		python	tpr_fpr.py	SARS_SF2_Di_-1.ct	Sun_Reactivities_top_71_percent_constrained.DBN	>>	SF2_Di_Sun_SHAPE_tpr_fpr.txt			tpr_fpr_	Sun_Reactivities_top_	71	_percent_constrained.DBN	_percent_constrained.txt
python	Lowest_to_highest_percent_react_to_constraint_SHAPE.py	Incarnato_SHAPE_SARS2_in_vitro_Reactivity.txt	72		python	tpr_fpr.py	SARS_SF2_Di_-1.ct	Sun_Reactivities_top_72_percent_constrained.DBN	>>	SF2_Di_Sun_SHAPE_tpr_fpr.txt			tpr_fpr_	Sun_Reactivities_top_	72	_percent_constrained.DBN	_percent_constrained.txt
python	Lowest_to_highest_percent_react_to_constraint_SHAPE.py	Incarnato_SHAPE_SARS2_in_vitro_Reactivity.txt	73		python	tpr_fpr.py	SARS_SF2_Di_-1.ct	Sun_Reactivities_top_73_percent_constrained.DBN	>>	SF2_Di_Sun_SHAPE_tpr_fpr.txt			tpr_fpr_	Sun_Reactivities_top_	73	_percent_constrained.DBN	_percent_constrained.txt
python	Lowest_to_highest_percent_react_to_constraint_SHAPE.py	Incarnato_SHAPE_SARS2_in_vitro_Reactivity.txt	74		python	tpr_fpr.py	SARS_SF2_Di_-1.ct	Sun_Reactivities_top_74_percent_constrained.DBN	>>	SF2_Di_Sun_SHAPE_tpr_fpr.txt			tpr_fpr_	Sun_Reactivities_top_	74	_percent_constrained.DBN	_percent_constrained.txt
python	Lowest_to_highest_percent_react_to_constraint_SHAPE.py	Incarnato_SHAPE_SARS2_in_vitro_Reactivity.txt	75		python	tpr_fpr.py	SARS_SF2_Di_-1.ct	Sun_Reactivities_top_75_percent_constrained.DBN	>>	SF2_Di_Sun_SHAPE_tpr_fpr.txt			tpr_fpr_	Sun_Reactivities_top_	75	_percent_constrained.DBN	_percent_constrained.txt
python	Lowest_to_highest_percent_react_to_constraint_SHAPE.py	Incarnato_SHAPE_SARS2_in_vitro_Reactivity.txt	76		python	tpr_fpr.py	SARS_SF2_Di_-1.ct	Sun_Reactivities_top_76_percent_constrained.DBN	>>	SF2_Di_Sun_SHAPE_tpr_fpr.txt			tpr_fpr_	Sun_Reactivities_top_	76	_percent_constrained.DBN	_percent_constrained.txt
python	Lowest_to_highest_percent_react_to_constraint_SHAPE.py	Incarnato_SHAPE_SARS2_in_vitro_Reactivity.txt	77		python	tpr_fpr.py	SARS_SF2_Di_-1.ct	Sun_Reactivities_top_77_percent_constrained.DBN	>>	SF2_Di_Sun_SHAPE_tpr_fpr.txt			tpr_fpr_	Sun_Reactivities_top_	77	_percent_constrained.DBN	_percent_constrained.txt
python	Lowest_to_highest_percent_react_to_constraint_SHAPE.py	Incarnato_SHAPE_SARS2_in_vitro_Reactivity.txt	78		python	tpr_fpr.py	SARS_SF2_Di_-1.ct	Sun_Reactivities_top_78_percent_constrained.DBN	>>	SF2_Di_Sun_SHAPE_tpr_fpr.txt			tpr_fpr_	Sun_Reactivities_top_	78	_percent_constrained.DBN	_percent_constrained.txt
python	Lowest_to_highest_percent_react_to_constraint_SHAPE.py	Incarnato_SHAPE_SARS2_in_vitro_Reactivity.txt	79		python	tpr_fpr.py	SARS_SF2_Di_-1.ct	Sun_Reactivities_top_79_percent_constrained.DBN	>>	SF2_Di_Sun_SHAPE_tpr_fpr.txt			tpr_fpr_	Sun_Reactivities_top_	79	_percent_constrained.DBN	_percent_constrained.txt
python	Lowest_to_highest_percent_react_to_constraint_SHAPE.py	Incarnato_SHAPE_SARS2_in_vitro_Reactivity.txt	80		python	tpr_fpr.py	SARS_SF2_Di_-1.ct	Sun_Reactivities_top_80_percent_constrained.DBN	>>	SF2_Di_Sun_SHAPE_tpr_fpr.txt			tpr_fpr_	Sun_Reactivities_top_	80	_percent_constrained.DBN	_percent_constrained.txt
python	Lowest_to_highest_percent_react_to_constraint_SHAPE.py	Incarnato_SHAPE_SARS2_in_vitro_Reactivity.txt	81		python	tpr_fpr.py	SARS_SF2_Di_-1.ct	Sun_Reactivities_top_81_percent_constrained.DBN	>>	SF2_Di_Sun_SHAPE_tpr_fpr.txt			tpr_fpr_	Sun_Reactivities_top_	81	_percent_constrained.DBN	_percent_constrained.txt
python	Lowest_to_highest_percent_react_to_constraint_SHAPE.py	Incarnato_SHAPE_SARS2_in_vitro_Reactivity.txt	82		python	tpr_fpr.py	SARS_SF2_Di_-1.ct	Sun_Reactivities_top_82_percent_constrained.DBN	>>	SF2_Di_Sun_SHAPE_tpr_fpr.txt			tpr_fpr_	Sun_Reactivities_top_	82	_percent_constrained.DBN	_percent_constrained.txt
python	Lowest_to_highest_percent_react_to_constraint_SHAPE.py	Incarnato_SHAPE_SARS2_in_vitro_Reactivity.txt	83		python	tpr_fpr.py	SARS_SF2_Di_-1.ct	Sun_Reactivities_top_83_percent_constrained.DBN	>>	SF2_Di_Sun_SHAPE_tpr_fpr.txt			tpr_fpr_	Sun_Reactivities_top_	83	_percent_constrained.DBN	_percent_constrained.txt
python	Lowest_to_highest_percent_react_to_constraint_SHAPE.py	Incarnato_SHAPE_SARS2_in_vitro_Reactivity.txt	84		python	tpr_fpr.py	SARS_SF2_Di_-1.ct	Sun_Reactivities_top_84_percent_constrained.DBN	>>	SF2_Di_Sun_SHAPE_tpr_fpr.txt			tpr_fpr_	Sun_Reactivities_top_	84	_percent_constrained.DBN	_percent_constrained.txt
python	Lowest_to_highest_percent_react_to_constraint_SHAPE.py	Incarnato_SHAPE_SARS2_in_vitro_Reactivity.txt	85		python	tpr_fpr.py	SARS_SF2_Di_-1.ct	Sun_Reactivities_top_85_percent_constrained.DBN	>>	SF2_Di_Sun_SHAPE_tpr_fpr.txt			tpr_fpr_	Sun_Reactivities_top_	85	_percent_constrained.DBN	_percent_constrained.txt
python	Lowest_to_highest_percent_react_to_constraint_SHAPE.py	Incarnato_SHAPE_SARS2_in_vitro_Reactivity.txt	86		python	tpr_fpr.py	SARS_SF2_Di_-1.ct	Sun_Reactivities_top_86_percent_constrained.DBN	>>	SF2_Di_Sun_SHAPE_tpr_fpr.txt			tpr_fpr_	Sun_Reactivities_top_	86	_percent_constrained.DBN	_percent_constrained.txt
python	Lowest_to_highest_percent_react_to_constraint_SHAPE.py	Incarnato_SHAPE_SARS2_in_vitro_Reactivity.txt	87		python	tpr_fpr.py	SARS_SF2_Di_-1.ct	Sun_Reactivities_top_87_percent_constrained.DBN	>>	SF2_Di_Sun_SHAPE_tpr_fpr.txt			tpr_fpr_	Sun_Reactivities_top_	87	_percent_constrained.DBN	_percent_constrained.txt
python	Lowest_to_highest_percent_react_to_constraint_SHAPE.py	Incarnato_SHAPE_SARS2_in_vitro_Reactivity.txt	88		python	tpr_fpr.py	SARS_SF2_Di_-1.ct	Sun_Reactivities_top_88_percent_constrained.DBN	>>	SF2_Di_Sun_SHAPE_tpr_fpr.txt			tpr_fpr_	Sun_Reactivities_top_	88	_percent_constrained.DBN	_percent_constrained.txt
python	Lowest_to_highest_percent_react_to_constraint_SHAPE.py	Incarnato_SHAPE_SARS2_in_vitro_Reactivity.txt	89		python	tpr_fpr.py	SARS_SF2_Di_-1.ct	Sun_Reactivities_top_89_percent_constrained.DBN	>>	SF2_Di_Sun_SHAPE_tpr_fpr.txt			tpr_fpr_	Sun_Reactivities_top_	89	_percent_constrained.DBN	_percent_constrained.txt
python	Lowest_to_highest_percent_react_to_constraint_SHAPE.py	Incarnato_SHAPE_SARS2_in_vitro_Reactivity.txt	90		python	tpr_fpr.py	SARS_SF2_Di_-1.ct	Sun_Reactivities_top_90_percent_constrained.DBN	>>	SF2_Di_Sun_SHAPE_tpr_fpr.txt			tpr_fpr_	Sun_Reactivities_top_	90	_percent_constrained.DBN	_percent_constrained.txt
python	Lowest_to_highest_percent_react_to_constraint_SHAPE.py	Incarnato_SHAPE_SARS2_in_vitro_Reactivity.txt	91		python	tpr_fpr.py	SARS_SF2_Di_-1.ct	Sun_Reactivities_top_91_percent_constrained.DBN	>>	SF2_Di_Sun_SHAPE_tpr_fpr.txt			tpr_fpr_	Sun_Reactivities_top_	91	_percent_constrained.DBN	_percent_constrained.txt
python	Lowest_to_highest_percent_react_to_constraint_SHAPE.py	Incarnato_SHAPE_SARS2_in_vitro_Reactivity.txt	92		python	tpr_fpr.py	SARS_SF2_Di_-1.ct	Sun_Reactivities_top_92_percent_constrained.DBN	>>	SF2_Di_Sun_SHAPE_tpr_fpr.txt			tpr_fpr_	Sun_Reactivities_top_	92	_percent_constrained.DBN	_percent_constrained.txt
python	Lowest_to_highest_percent_react_to_constraint_SHAPE.py	Incarnato_SHAPE_SARS2_in_vitro_Reactivity.txt	93		python	tpr_fpr.py	SARS_SF2_Di_-1.ct	Sun_Reactivities_top_93_percent_constrained.DBN	>>	SF2_Di_Sun_SHAPE_tpr_fpr.txt			tpr_fpr_	Sun_Reactivities_top_	93	_percent_constrained.DBN	_percent_constrained.txt
python	Lowest_to_highest_percent_react_to_constraint_SHAPE.py	Incarnato_SHAPE_SARS2_in_vitro_Reactivity.txt	94		python	tpr_fpr.py	SARS_SF2_Di_-1.ct	Sun_Reactivities_top_94_percent_constrained.DBN	>>	SF2_Di_Sun_SHAPE_tpr_fpr.txt			tpr_fpr_	Sun_Reactivities_top_	94	_percent_constrained.DBN	_percent_constrained.txt
python	Lowest_to_highest_percent_react_to_constraint_SHAPE.py	Incarnato_SHAPE_SARS2_in_vitro_Reactivity.txt	95		python	tpr_fpr.py	SARS_SF2_Di_-1.ct	Sun_Reactivities_top_95_percent_constrained.DBN	>>	SF2_Di_Sun_SHAPE_tpr_fpr.txt			tpr_fpr_	Sun_Reactivities_top_	95	_percent_constrained.DBN	_percent_constrained.txt
python	Lowest_to_highest_percent_react_to_constraint_SHAPE.py	Incarnato_SHAPE_SARS2_in_vitro_Reactivity.txt	96		python	tpr_fpr.py	SARS_SF2_Di_-1.ct	Sun_Reactivities_top_96_percent_constrained.DBN	>>	SF2_Di_Sun_SHAPE_tpr_fpr.txt			tpr_fpr_	Sun_Reactivities_top_	96	_percent_constrained.DBN	_percent_constrained.txt
python	Lowest_to_highest_percent_react_to_constraint_SHAPE.py	Incarnato_SHAPE_SARS2_in_vitro_Reactivity.txt	97		python	tpr_fpr.py	SARS_SF2_Di_-1.ct	Sun_Reactivities_top_97_percent_constrained.DBN	>>	SF2_Di_Sun_SHAPE_tpr_fpr.txt			tpr_fpr_	Sun_Reactivities_top_	97	_percent_constrained.DBN	_percent_constrained.txt
python	Lowest_to_highest_percent_react_to_constraint_SHAPE.py	Incarnato_SHAPE_SARS2_in_vitro_Reactivity.txt	98		python	tpr_fpr.py	SARS_SF2_Di_-1.ct	Sun_Reactivities_top_98_percent_constrained.DBN	>>	SF2_Di_Sun_SHAPE_tpr_fpr.txt			tpr_fpr_	Sun_Reactivities_top_	98	_percent_constrained.DBN	_percent_constrained.txt
python	Lowest_to_highest_percent_react_to_constraint_SHAPE.py	Incarnato_SHAPE_SARS2_in_vitro_Reactivity.txt	99		python	tpr_fpr.py	SARS_SF2_Di_-1.ct	Sun_Reactivities_top_99_percent_constrained.DBN	>>	SF2_Di_Sun_SHAPE_tpr_fpr.txt			tpr_fpr_	Sun_Reactivities_top_	99	_percent_constrained.DBN	_percent_constrained.txt
python	Lowest_to_highest_percent_react_to_constraint_SHAPE.py	Incarnato_SHAPE_SARS2_in_vitro_Reactivity.txt	100		python	tpr_fpr.py	SARS_SF2_Di_-1.ct	Sun_Reactivities_top_100_percent_constrained.DBN	>>	SF2_Di_Sun_SHAPE_tpr_fpr.txt			tpr_fpr_	Sun_Reactivities_top_	100	_percent_constrained.DBN	_percent_constrained.txt
					python	tpr_fpr.py	SARS_SF1_100_di_-1.ct	SHAPE_in_vivo_Incar_top_33_percent_constrained.DBN	>	SF1_Di_100_SHAPE_in_vivo_Incar_33_tpr_fpr.txt

## Sheet: SF1 100Rnd Mono Results
Rouskins								Incarnato SHAPE in vitro								Incarnato SHAPE in vivo								Incarnato DMS in vitro								Pyle SHAPE								Sun SHAPE
		fpr	tpr	fpr norm	tpf norm	AUC				fpr	tpr	fpr norm	tpf norm	AUC				fpr	tpr	fpr norm	tpf norm	AUC				fpr	tpr	fpr norm	tpf norm	AUC				fpr	tpr	fpr norm	tpf norm	AUC				fpr	tpr	fpr norm	tpf norm	AUC
SARS_SF1_100_mono_-1.ct	Rouskin_DMS_SARS2_Reactivity_top_0_percent_constrained.DBN	0	0	0	0			SARS_SF1_100_mono_-1.ct	Incarnato_SHAPE_SARS2_in_vitro_Reactivity_top_0_percent_constrained.DBN	0	0	0	0	0		SARS_SF1_100_mono_-1.ct	SHAPE_in_vivo_Incar_top_0_percent_constrained.DBN	0	0	0	0			SARS_SF1_100_mono_-1.ct	Incar_DMS_invitro_Reactivities_top_0_percent_constrained.DBN	0	0	0	0			SARS_SF1_100_mono_-1.ct	Pyle_SHAPE_SARS2_Reactivity_top_0_percent_constrained.DBN	0	0	0	0			SARS_SF1_100_mono_-1.ct	Sun_Reactivities_top_0_percent_constrained.DBN	0	0	0	0
SARS_SF1_100_mono_-1.ct	Rouskin_DMS_SARS2_Reactivity_top_1_percent_constrained.DBN	0.0035824	0.00658751	0.00702498	0.0148433	0.000104274		SARS_SF1_100_mono_-1.ct	Incarnato_SHAPE_SARS2_in_vitro_Reactivity_top_1_percent_constrained.DBN	0.00721304	0.013419	0.00738115	0.0137317	0.000101356		SARS_SF1_100_mono_-1.ct	SHAPE_in_vivo_Incar_top_1_percent_constrained.DBN	0.00494122	0.0169974	0.00499311	0.0171551	8.56571e-05		SARS_SF1_100_mono_-1.ct	Incar_DMS_invitro_Reactivities_top_1_percent_constrained.DBN	0.0051116	0.00439167	0.0100784	0.00996126	0.000100393		SARS_SF1_100_mono_-1.ct	Pyle_SHAPE_SARS2_Reactivity_top_1_percent_constrained.DBN	0.00874652	0.0117111	0.00877443	0.0117168	0.000102809		SARS_SF1_100_mono_-1.ct	Sun_Reactivities_top_1_percent_constrained.DBN	0.00670188	0.0147202	0.00670188	0.0147202	9.86532e-05
SARS_SF1_100_mono_-1.ct	Rouskin_DMS_SARS2_Reactivity_top_2_percent_constrained.DBN	0.00517457	0.0160215	0.0101472	0.0361004	0.000112713		SARS_SF1_100_mono_-1.ct	Incarnato_SHAPE_SARS2_in_vitro_Reactivity_top_2_percent_constrained.DBN	0.0109048	0.0318803	0.0111589	0.0326233	0.000123243		SARS_SF1_100_mono_-1.ct	SHAPE_in_vivo_Incar_top_2_percent_constrained.DBN	0.0120975	0.030823	0.0122245	0.0311089	0.000224961		SARS_SF1_100_mono_-1.ct	Incar_DMS_invitro_Reactivities_top_2_percent_constrained.DBN	0.0100528	0.008946	0.0198208	0.0202915	0.000197688		SARS_SF1_100_mono_-1.ct	Pyle_SHAPE_SARS2_Reactivity_top_2_percent_constrained.DBN	0.0165275	0.0248861	0.0165803	0.0248983	0.000194352		SARS_SF1_100_mono_-1.ct	Sun_Reactivities_top_2_percent_constrained.DBN	0.00993923	0.0344014	0.00993923	0.0344014	0.000111369
SARS_SF1_100_mono_-1.ct	Rouskin_DMS_SARS2_Reactivity_top_3_percent_constrained.DBN	0.00767656	0.0242355	0.0150535	0.0546088	0.000267929		SARS_SF1_100_mono_-1.ct	Incarnato_SHAPE_SARS2_in_vitro_Reactivity_top_3_percent_constrained.DBN	0.015846	0.0485524	0.0162153	0.0496839	0.000251221		SARS_SF1_100_mono_-1.ct	SHAPE_in_vivo_Incar_top_3_percent_constrained.DBN	0.0195945	0.0441607	0.0198003	0.0445703	0.000337654		SARS_SF1_100_mono_-1.ct	Incar_DMS_invitro_Reactivities_top_3_percent_constrained.DBN	0.0152212	0.0132563	0.0300112	0.0300683	0.000306407		SARS_SF1_100_mono_-1.ct	Pyle_SHAPE_SARS2_Reactivity_top_3_percent_constrained.DBN	0.0239109	0.0385491	0.0239872	0.0385679	0.000285672		SARS_SF1_100_mono_-1.ct	Sun_Reactivities_top_3_percent_constrained.DBN	0.012779	0.0546519	0.012779	0.0546519	0.000155199
SARS_SF1_100_mono_-1.ct	Rouskin_DMS_SARS2_Reactivity_top_4_percent_constrained.DBN	0.0093256	0.0335882	0.0182872	0.0756826	0.000244736		SARS_SF1_100_mono_-1.ct	Incarnato_SHAPE_SARS2_in_vitro_Reactivity_top_4_percent_constrained.DBN	0.0219799	0.0635166	0.0224922	0.0649969	0.000407978		SARS_SF1_100_mono_-1.ct	SHAPE_in_vivo_Incar_top_4_percent_constrained.DBN	0.0268643	0.0578237	0.0271465	0.05836	0.000428724		SARS_SF1_100_mono_-1.ct	Incar_DMS_invitro_Reactivities_top_4_percent_constrained.DBN	0.0194241	0.0188679	0.0382979	0.0427965	0.000354641		SARS_SF1_100_mono_-1.ct	Pyle_SHAPE_SARS2_Reactivity_top_4_percent_constrained.DBN	0.0323167	0.0508295	0.0324198	0.0508544	0.000428833		SARS_SF1_100_mono_-1.ct	Sun_Reactivities_top_4_percent_constrained.DBN	0.0160164	0.0743331	0.0160164	0.0743331	0.000240642
SARS_SF1_100_mono_-1.ct	Rouskin_DMS_SARS2_Reactivity_top_5_percent_constrained.DBN	0.0111452	0.0426968	0.0218555	0.0962067	0.000343289		SARS_SF1_100_mono_-1.ct	Incarnato_SHAPE_SARS2_in_vitro_Reactivity_top_5_percent_constrained.DBN	0.0279434	0.0787248	0.0285947	0.0805595	0.000491616		SARS_SF1_100_mono_-1.ct	SHAPE_in_vivo_Incar_top_5_percent_constrained.DBN	0.0345885	0.070836	0.0349518	0.0714931	0.000558027		SARS_SF1_100_mono_-1.ct	Incar_DMS_invitro_Reactivities_top_5_percent_constrained.DBN	0.0229454	0.0255368	0.0452408	0.0579229	0.000402152		SARS_SF1_100_mono_-1.ct	Pyle_SHAPE_SARS2_Reactivity_top_5_percent_constrained.DBN	0.0397001	0.0644925	0.0398268	0.064524	0.000477928		SARS_SF1_100_mono_-1.ct	Sun_Reactivities_top_5_percent_constrained.DBN	0.0210712	0.0914118	0.0210712	0.0914118	0.000462069
SARS_SF1_100_mono_-1.ct	Rouskin_DMS_SARS2_Reactivity_top_6_percent_constrained.DBN	0.013306	0.0513988	0.0260928	0.115815	0.00049074		SARS_SF1_100_mono_-1.ct	Incarnato_SHAPE_SARS2_in_vitro_Reactivity_top_6_percent_constrained.DBN	0.0345317	0.0930384	0.0353365	0.0952067	0.000641868		SARS_SF1_100_mono_-1.ct	SHAPE_in_vivo_Incar_top_6_percent_constrained.DBN	0.0410632	0.0856376	0.0414945	0.0864319	0.000565498		SARS_SF1_100_mono_-1.ct	Incar_DMS_invitro_Reactivities_top_6_percent_constrained.DBN	0.0253876	0.0336695	0.050056	0.0763697	0.000367738		SARS_SF1_100_mono_-1.ct	Pyle_SHAPE_SARS2_Reactivity_top_6_percent_constrained.DBN	0.0477083	0.0772609	0.0478605	0.0772986	0.000620996		SARS_SF1_100_mono_-1.ct	Sun_Reactivities_top_6_percent_constrained.DBN	0.0278866	0.105969	0.0278866	0.105969	0.000722232
SARS_SF1_100_mono_-1.ct	Rouskin_DMS_SARS2_Reactivity_top_7_percent_constrained.DBN	0.0148414	0.0609141	0.0291035	0.137255	0.000413234		SARS_SF1_100_mono_-1.ct	Incarnato_SHAPE_SARS2_in_vitro_Reactivity_top_7_percent_constrained.DBN	0.0419151	0.106213	0.042892	0.108689	0.000821199		SARS_SF1_100_mono_-1.ct	SHAPE_in_vivo_Incar_top_7_percent_constrained.DBN	0.0444709	0.104831	0.044938	0.105803	0.000364336		SARS_SF1_100_mono_-1.ct	Incar_DMS_invitro_Reactivities_top_7_percent_constrained.DBN	0.0282842	0.0412329	0.0557671	0.0935252	0.00053413		SARS_SF1_100_mono_-1.ct	Pyle_SHAPE_SARS2_Reactivity_top_7_percent_constrained.DBN	0.0557165	0.0901106	0.0558943	0.0901546	0.000724278		SARS_SF1_100_mono_-1.ct	Sun_Reactivities_top_7_percent_constrained.DBN	0.0340206	0.121503	0.0340206	0.121503	0.00074529
SARS_SF1_100_mono_-1.ct	Rouskin_DMS_SARS2_Reactivity_top_8_percent_constrained.DBN	0.017059	0.0694535	0.0334523	0.156496	0.00068057		SARS_SF1_100_mono_-1.ct	Incarnato_SHAPE_SARS2_in_vitro_Reactivity_top_8_percent_constrained.DBN	0.0462316	0.12378	0.0473091	0.126665	0.000559487		SARS_SF1_100_mono_-1.ct	SHAPE_in_vivo_Incar_top_8_percent_constrained.DBN	0.051684	0.118656	0.0522268	0.119757	0.000872885		SARS_SF1_100_mono_-1.ct	Incar_DMS_invitro_Reactivities_top_8_percent_constrained.DBN	0.0302153	0.0500976	0.0595745	0.113632	0.000432642		SARS_SF1_100_mono_-1.ct	Pyle_SHAPE_SARS2_Reactivity_top_8_percent_constrained.DBN	0.0646334	0.101578	0.0648396	0.101627	0.000909093		SARS_SF1_100_mono_-1.ct	Sun_Reactivities_top_8_percent_constrained.DBN	0.040836	0.136061	0.040836	0.136061	0.000927316
SARS_SF1_100_mono_-1.ct	Rouskin_DMS_SARS2_Reactivity_top_9_percent_constrained.DBN	0.0196747	0.0774236	0.0385816	0.174455	0.00089484		SARS_SF1_100_mono_-1.ct	Incarnato_SHAPE_SARS2_in_vitro_Reactivity_top_9_percent_constrained.DBN	0.0502641	0.141753	0.0514355	0.145057	0.000598573		SARS_SF1_100_mono_-1.ct	SHAPE_in_vivo_Incar_top_9_percent_constrained.DBN	0.0578747	0.133865	0.0584826	0.135106	0.00084519		SARS_SF1_100_mono_-1.ct	Incar_DMS_invitro_Reactivities_top_9_percent_constrained.DBN	0.0325439	0.0584743	0.0641657	0.132632	0.00060895		SARS_SF1_100_mono_-1.ct	Pyle_SHAPE_SARS2_Reactivity_top_9_percent_constrained.DBN	0.0733799	0.11337	0.073614	0.113426	0.000995244		SARS_SF1_100_mono_-1.ct	Sun_Reactivities_top_9_percent_constrained.DBN	0.045834	0.153221	0.045834	0.153221	0.000765798
SARS_SF1_100_mono_-1.ct	Rouskin_DMS_SARS2_Reactivity_top_10_percent_constrained.DBN	0.0224042	0.085231	0.043934	0.192047	0.0010279		SARS_SF1_100_mono_-1.ct	Incarnato_SHAPE_SARS2_in_vitro_Reactivity_top_10_percent_constrained.DBN	0.0545806	0.15932	0.0558526	0.163033	0.000720128		SARS_SF1_100_mono_-1.ct	SHAPE_in_vivo_Incar_top_10_percent_constrained.DBN	0.0648606	0.147934	0.0655418	0.149306	0.00105399		SARS_SF1_100_mono_-1.ct	Incar_DMS_invitro_Reactivities_top_10_percent_constrained.DBN	0.0346453	0.067095	0.0683091	0.152186	0.000630558		SARS_SF1_100_mono_-1.ct	Pyle_SHAPE_SARS2_Reactivity_top_10_percent_constrained.DBN	0.0811609	0.126464	0.0814199	0.126526	0.000987637		SARS_SF1_100_mono_-1.ct	Sun_Reactivities_top_10_percent_constrained.DBN	0.0517976	0.168998	0.0517976	0.168998	0.00100783
SARS_SF1_100_mono_-1.ct	Rouskin_DMS_SARS2_Reactivity_top_11_percent_constrained.DBN	0.0250199	0.0932824	0.0490633	0.210189	0.00107813		SARS_SF1_100_mono_-1.ct	Incarnato_SHAPE_SARS2_in_vitro_Reactivity_top_11_percent_constrained.DBN	0.0598626	0.175504	0.0612577	0.179594	0.000970725		SARS_SF1_100_mono_-1.ct	SHAPE_in_vivo_Incar_top_11_percent_constrained.DBN	0.0717328	0.162167	0.0724862	0.163671	0.0011366		SARS_SF1_100_mono_-1.ct	Incar_DMS_invitro_Reactivities_top_11_percent_constrained.DBN	0.0370307	0.0753904	0.0730123	0.171002	0.000804263		SARS_SF1_100_mono_-1.ct	Pyle_SHAPE_SARS2_Reactivity_top_11_percent_constrained.DBN	0.0884307	0.140371	0.0887129	0.140439	0.00102423		SARS_SF1_100_mono_-1.ct	Sun_Reactivities_top_11_percent_constrained.DBN	0.0608281	0.180384	0.0608281	0.180384	0.00162896
SARS_SF1_100_mono_-1.ct	Rouskin_DMS_SARS2_Reactivity_top_12_percent_constrained.DBN	0.0274082	0.101578	0.0537467	0.22888	0.00107192		SARS_SF1_100_mono_-1.ct	Incarnato_SHAPE_SARS2_in_vitro_Reactivity_top_12_percent_constrained.DBN	0.0659397	0.19055	0.0674765	0.194991	0.0012126		SARS_SF1_100_mono_-1.ct	SHAPE_in_vivo_Incar_top_12_percent_constrained.DBN	0.0790027	0.17583	0.0798324	0.17746	0.00130366		SARS_SF1_100_mono_-1.ct	Incar_DMS_invitro_Reactivities_top_12_percent_constrained.DBN	0.0398137	0.0830351	0.0784994	0.188342	0.00103345		SARS_SF1_100_mono_-1.ct	Pyle_SHAPE_SARS2_Reactivity_top_12_percent_constrained.DBN	0.0971205	0.152163	0.0974303	0.152238	0.00132712		SARS_SF1_100_mono_-1.ct	Sun_Reactivities_top_12_percent_constrained.DBN	0.066962	0.195917	0.066962	0.195917	0.00120174
SARS_SF1_100_mono_-1.ct	Rouskin_DMS_SARS2_Reactivity_top_13_percent_constrained.DBN	0.0301945	0.109304	0.0592105	0.246289	0.00134569		SARS_SF1_100_mono_-1.ct	Incarnato_SHAPE_SARS2_in_vitro_Reactivity_top_13_percent_constrained.DBN	0.0713921	0.20649	0.0730559	0.211302	0.00117895		SARS_SF1_100_mono_-1.ct	SHAPE_in_vivo_Incar_top_13_percent_constrained.DBN	0.0854206	0.190712	0.0863177	0.192481	0.0012483		SARS_SF1_100_mono_-1.ct	Incar_DMS_invitro_Reactivities_top_13_percent_constrained.DBN	0.0424263	0.0910052	0.0836506	0.206419	0.0010633		SARS_SF1_100_mono_-1.ct	Pyle_SHAPE_SARS2_Reactivity_top_13_percent_constrained.DBN	0.105526	0.164362	0.105863	0.164443	0.00138667		SARS_SF1_100_mono_-1.ct	Sun_Reactivities_top_13_percent_constrained.DBN	0.0757085	0.20771	0.0757085	0.20771	0.00181674
SARS_SF1_100_mono_-1.ct	Rouskin_DMS_SARS2_Reactivity_top_14_percent_constrained.DBN	0.0332082	0.116786	0.0651204	0.263148	0.00155518		SARS_SF1_100_mono_-1.ct	Incarnato_SHAPE_SARS2_in_vitro_Reactivity_top_14_percent_constrained.DBN	0.0769012	0.222349	0.0786935	0.227531	0.00128272		SARS_SF1_100_mono_-1.ct	SHAPE_in_vivo_Incar_top_14_percent_constrained.DBN	0.0913273	0.206327	0.0922865	0.208241	0.00124294		SARS_SF1_100_mono_-1.ct	Incar_DMS_invitro_Reactivities_top_14_percent_constrained.DBN	0.0446413	0.0994632	0.0880179	0.225604	0.000985281		SARS_SF1_100_mono_-1.ct	Pyle_SHAPE_SARS2_Reactivity_top_14_percent_constrained.DBN	0.113364	0.177456	0.113726	0.177543	0.00139598		SARS_SF1_100_mono_-1.ct	Sun_Reactivities_top_14_percent_constrained.DBN	0.0806497	0.224951	0.0806497	0.224951	0.00111153
SARS_SF1_100_mono_-1.ct	Rouskin_DMS_SARS2_Reactivity_top_15_percent_constrained.DBN	0.0358808	0.124675	0.0703613	0.280924	0.00147228		SARS_SF1_100_mono_-1.ct	Incarnato_SHAPE_SARS2_in_vitro_Reactivity_top_15_percent_constrained.DBN	0.083092	0.237232	0.0850285	0.24276	0.00153789		SARS_SF1_100_mono_-1.ct	SHAPE_in_vivo_Incar_top_15_percent_constrained.DBN	0.0976316	0.221373	0.098657	0.223426	0.00142334		SARS_SF1_100_mono_-1.ct	Incar_DMS_invitro_Reactivities_top_15_percent_constrained.DBN	0.0468564	0.108003	0.0923852	0.244973	0.00106987		SARS_SF1_100_mono_-1.ct	Pyle_SHAPE_SARS2_Reactivity_top_15_percent_constrained.DBN	0.121429	0.190143	0.121816	0.190236	0.00153914		SARS_SF1_100_mono_-1.ct	Sun_Reactivities_top_15_percent_constrained.DBN	0.0857613	0.241949	0.0857613	0.241949	0.00123675
SARS_SF1_100_mono_-1.ct	Rouskin_DMS_SARS2_Reactivity_top_16_percent_constrained.DBN	0.0386103	0.132482	0.0757136	0.298516	0.00159776		SARS_SF1_100_mono_-1.ct	Incarnato_SHAPE_SARS2_in_vitro_Reactivity_top_16_percent_constrained.DBN	0.0887715	0.252846	0.0908404	0.258739	0.00150377		SARS_SF1_100_mono_-1.ct	SHAPE_in_vivo_Incar_top_16_percent_constrained.DBN	0.104334	0.235849	0.105429	0.238037	0.00161205		SARS_SF1_100_mono_-1.ct	Incar_DMS_invitro_Reactivities_top_16_percent_constrained.DBN	0.0499233	0.115241	0.0984323	0.261391	0.00158064		SARS_SF1_100_mono_-1.ct	Pyle_SHAPE_SARS2_Reactivity_top_16_percent_constrained.DBN	0.130175	0.201936	0.130591	0.202034	0.00177273		SARS_SF1_100_mono_-1.ct	Sun_Reactivities_top_16_percent_constrained.DBN	0.0907026	0.25919	0.0907026	0.25919	0.00128071
SARS_SF1_100_mono_-1.ct	Rouskin_DMS_SARS2_Reactivity_top_17_percent_constrained.DBN	0.0411122	0.140615	0.08062	0.316841	0.00155453		SARS_SF1_100_mono_-1.ct	Incarnato_SHAPE_SARS2_in_vitro_Reactivity_top_17_percent_constrained.DBN	0.0945647	0.268299	0.0967686	0.274552	0.00162759		SARS_SF1_100_mono_-1.ct	SHAPE_in_vivo_Incar_top_17_percent_constrained.DBN	0.111149	0.250163	0.112316	0.252483	0.00173886		SARS_SF1_100_mono_-1.ct	Incar_DMS_invitro_Reactivities_top_17_percent_constrained.DBN	0.0524791	0.123292	0.103471	0.279653	0.00140923		SARS_SF1_100_mono_-1.ct	Pyle_SHAPE_SARS2_Reactivity_top_17_percent_constrained.DBN	0.138127	0.214785	0.138568	0.21489	0.00171413		SARS_SF1_100_mono_-1.ct	Sun_Reactivities_top_17_percent_constrained.DBN	0.0938831	0.279034	0.0938831	0.279034	0.000887482
SARS_SF1_100_mono_-1.ct	Rouskin_DMS_SARS2_Reactivity_top_18_percent_constrained.DBN	0.0447515	0.147121	0.0877565	0.331501	0.00236575		SARS_SF1_100_mono_-1.ct	Incarnato_SHAPE_SARS2_in_vitro_Reactivity_top_18_percent_constrained.DBN	0.101891	0.281555	0.104266	0.288117	0.00216012		SARS_SF1_100_mono_-1.ct	SHAPE_in_vivo_Incar_top_18_percent_constrained.DBN	0.118305	0.263988	0.119548	0.266437	0.00192671		SARS_SF1_100_mono_-1.ct	Incar_DMS_invitro_Reactivities_top_18_percent_constrained.DBN	0.0556029	0.130449	0.10963	0.295886	0.00182237		SARS_SF1_100_mono_-1.ct	Pyle_SHAPE_SARS2_Reactivity_top_18_percent_constrained.DBN	0.145113	0.229018	0.145576	0.229129	0.00160577		SARS_SF1_100_mono_-1.ct	Sun_Reactivities_top_18_percent_constrained.DBN	0.0981428	0.297251	0.0981428	0.297251	0.00126619
SARS_SF1_100_mono_-1.ct	Rouskin_DMS_SARS2_Reactivity_top_19_percent_constrained.DBN	0.047879	0.15444	0.0938894	0.347993	0.00213421		SARS_SF1_100_mono_-1.ct	Incarnato_SHAPE_SARS2_in_vitro_Reactivity_top_19_percent_constrained.DBN	0.108991	0.295137	0.111531	0.302015	0.00219411		SARS_SF1_100_mono_-1.ct	SHAPE_in_vivo_Incar_top_19_percent_constrained.DBN	0.125234	0.278139	0.12655	0.280719	0.00196555		SARS_SF1_100_mono_-1.ct	Incar_DMS_invitro_Reactivities_top_19_percent_constrained.DBN	0.0584995	0.138012	0.115342	0.313042	0.00178781		SARS_SF1_100_mono_-1.ct	Pyle_SHAPE_SARS2_Reactivity_top_19_percent_constrained.DBN	0.153746	0.240973	0.154236	0.24109	0.00208796		SARS_SF1_100_mono_-1.ct	Sun_Reactivities_top_19_percent_constrained.DBN	0.103595	0.313761	0.103595	0.313761	0.00171074
SARS_SF1_100_mono_-1.ct	Rouskin_DMS_SARS2_Reactivity_top_20_percent_constrained.DBN	0.0506653	0.162167	0.0993533	0.365402	0.00199651		SARS_SF1_100_mono_-1.ct	Incarnato_SHAPE_SARS2_in_vitro_Reactivity_top_20_percent_constrained.DBN	0.116147	0.308637	0.118854	0.31583	0.00231283		SARS_SF1_100_mono_-1.ct	SHAPE_in_vivo_Incar_top_20_percent_constrained.DBN	0.132447	0.291884	0.133838	0.294591	0.00214721		SARS_SF1_100_mono_-1.ct	Incar_DMS_invitro_Reactivities_top_20_percent_constrained.DBN	0.0615664	0.14525	0.121389	0.32946	0.00199225		SARS_SF1_100_mono_-1.ct	Pyle_SHAPE_SARS2_Reactivity_top_20_percent_constrained.DBN	0.162038	0.253334	0.162555	0.253458	0.00210842		SARS_SF1_100_mono_-1.ct	Sun_Reactivities_top_20_percent_constrained.DBN	0.109729	0.329294	0.109729	0.329294	0.00201986
SARS_SF1_100_mono_-1.ct	Rouskin_DMS_SARS2_Reactivity_top_21_percent_constrained.DBN	0.0535085	0.169811	0.104929	0.382628	0.0021333		SARS_SF1_100_mono_-1.ct	Incarnato_SHAPE_SARS2_in_vitro_Reactivity_top_21_percent_constrained.DBN	0.123985	0.321161	0.126874	0.328646	0.00263589		SARS_SF1_100_mono_-1.ct	SHAPE_in_vivo_Incar_top_21_percent_constrained.DBN	0.139036	0.306522	0.140496	0.309366	0.0020596		SARS_SF1_100_mono_-1.ct	Incar_DMS_invitro_Reactivities_top_21_percent_constrained.DBN	0.064463	0.152814	0.1271	0.346615	0.00197955		SARS_SF1_100_mono_-1.ct	Pyle_SHAPE_SARS2_Reactivity_top_21_percent_constrained.DBN	0.1705	0.265534	0.171044	0.265663	0.00225536		SARS_SF1_100_mono_-1.ct	Sun_Reactivities_top_21_percent_constrained.DBN	0.114159	0.347267	0.114159	0.347267	0.00153841
SARS_SF1_100_mono_-1.ct	Rouskin_DMS_SARS2_Reactivity_top_22_percent_constrained.DBN	0.0565222	0.177293	0.110839	0.399487	0.00236093		SARS_SF1_100_mono_-1.ct	Incarnato_SHAPE_SARS2_in_vitro_Reactivity_top_22_percent_constrained.DBN	0.131198	0.33458	0.134255	0.342378	0.00252714		SARS_SF1_100_mono_-1.ct	SHAPE_in_vivo_Incar_top_22_percent_constrained.DBN	0.145965	0.320755	0.147498	0.32373	0.0022667		SARS_SF1_100_mono_-1.ct	Incar_DMS_invitro_Reactivities_top_22_percent_constrained.DBN	0.0674164	0.160215	0.132923	0.363402	0.00211611		SARS_SF1_100_mono_-1.ct	Pyle_SHAPE_SARS2_Reactivity_top_22_percent_constrained.DBN	0.178906	0.277733	0.179477	0.277868	0.00234314		SARS_SF1_100_mono_-1.ct	Sun_Reactivities_top_22_percent_constrained.DBN	0.119895	0.36337	0.119895	0.36337	0.00208442
SARS_SF1_100_mono_-1.ct	Rouskin_DMS_SARS2_Reactivity_top_23_percent_constrained.DBN	0.0598203	0.184288	0.117306	0.415246	0.00268558		SARS_SF1_100_mono_-1.ct	Incarnato_SHAPE_SARS2_in_vitro_Reactivity_top_23_percent_constrained.DBN	0.138468	0.347918	0.141695	0.356027	0.00264858		SARS_SF1_100_mono_-1.ct	SHAPE_in_vivo_Incar_top_23_percent_constrained.DBN	0.152837	0.334987	0.154442	0.338094	0.00234788		SARS_SF1_100_mono_-1.ct	Incar_DMS_invitro_Reactivities_top_23_percent_constrained.DBN	0.0698018	0.16851	0.137626	0.382217	0.00179766		SARS_SF1_100_mono_-1.ct	Pyle_SHAPE_SARS2_Reactivity_top_23_percent_constrained.DBN	0.18646	0.291152	0.187055	0.291294	0.0022074		SARS_SF1_100_mono_-1.ct	Sun_Reactivities_top_23_percent_constrained.DBN	0.125745	0.37931	0.125745	0.37931	0.00221895
SARS_SF1_100_mono_-1.ct	Rouskin_DMS_SARS2_Reactivity_top_24_percent_constrained.DBN	0.0631184	0.191282	0.123773	0.431006	0.00278751		SARS_SF1_100_mono_-1.ct	Incarnato_SHAPE_SARS2_in_vitro_Reactivity_top_24_percent_constrained.DBN	0.146419	0.36028	0.149831	0.368676	0.00299981		SARS_SF1_100_mono_-1.ct	SHAPE_in_vivo_Incar_top_24_percent_constrained.DBN	0.160277	0.348406	0.161961	0.351638	0.00264374		SARS_SF1_100_mono_-1.ct	Incar_DMS_invitro_Reactivities_top_24_percent_constrained.DBN	0.0730391	0.175504	0.144009	0.398082	0.00254095		SARS_SF1_100_mono_-1.ct	Pyle_SHAPE_SARS2_Reactivity_top_24_percent_constrained.DBN	0.19549	0.302537	0.196114	0.302685	0.00274212		SARS_SF1_100_mono_-1.ct	Sun_Reactivities_top_24_percent_constrained.DBN	0.131311	0.395657	0.131311	0.395657	0.00220221
SARS_SF1_100_mono_-1.ct	Rouskin_DMS_SARS2_Reactivity_top_25_percent_constrained.DBN	0.0660184	0.198845	0.12946	0.448048	0.002548		SARS_SF1_100_mono_-1.ct	Incarnato_SHAPE_SARS2_in_vitro_Reactivity_top_25_percent_constrained.DBN	0.15403	0.373129	0.157619	0.381826	0.00297365		SARS_SF1_100_mono_-1.ct	SHAPE_in_vivo_Incar_top_25_percent_constrained.DBN	0.167888	0.361581	0.169651	0.364935	0.00280655		SARS_SF1_100_mono_-1.ct	Incar_DMS_invitro_Reactivities_top_25_percent_constrained.DBN	0.0762197	0.182661	0.15028	0.414315	0.00259817		SARS_SF1_100_mono_-1.ct	Pyle_SHAPE_SARS2_Reactivity_top_25_percent_constrained.DBN	0.203896	0.314736	0.204547	0.31489	0.00265533		SARS_SF1_100_mono_-1.ct	Sun_Reactivities_top_25_percent_constrained.DBN	0.136764	0.412167	0.136764	0.412167	0.00224729
SARS_SF1_100_mono_-1.ct	Rouskin_DMS_SARS2_Reactivity_top_26_percent_constrained.DBN	0.0687479	0.206653	0.134813	0.46564	0.00249228		SARS_SF1_100_mono_-1.ct	Incarnato_SHAPE_SARS2_in_vitro_Reactivity_top_26_percent_constrained.DBN	0.161754	0.385817	0.165524	0.394808	0.00312065		SARS_SF1_100_mono_-1.ct	SHAPE_in_vivo_Incar_top_26_percent_constrained.DBN	0.175271	0.375081	0.177112	0.37856	0.00282443		SARS_SF1_100_mono_-1.ct	Incar_DMS_invitro_Reactivities_top_26_percent_constrained.DBN	0.0790595	0.190224	0.155879	0.43147	0.00241585		SARS_SF1_100_mono_-1.ct	Pyle_SHAPE_SARS2_Reactivity_top_26_percent_constrained.DBN	0.211848	0.327668	0.212524	0.327828	0.002615		SARS_SF1_100_mono_-1.ct	Sun_Reactivities_top_26_percent_constrained.DBN	0.143295	0.427131	0.143295	0.427131	0.0027898
SARS_SF1_100_mono_-1.ct	Rouskin_DMS_SARS2_Reactivity_top_27_percent_constrained.DBN	0.0718185	0.214053	0.140834	0.482316	0.00290422		SARS_SF1_100_mono_-1.ct	Incarnato_SHAPE_SARS2_in_vitro_Reactivity_top_27_percent_constrained.DBN	0.169762	0.398097	0.173718	0.407375	0.00333836		SARS_SF1_100_mono_-1.ct	SHAPE_in_vivo_Incar_top_27_percent_constrained.DBN	0.181576	0.390127	0.183483	0.393745	0.00250836		SARS_SF1_100_mono_-1.ct	Incar_DMS_invitro_Reactivities_top_27_percent_constrained.DBN	0.0820696	0.197625	0.161814	0.448257	0.00266043		SARS_SF1_100_mono_-1.ct	Pyle_SHAPE_SARS2_Reactivity_top_27_percent_constrained.DBN	0.219742	0.340599	0.220443	0.340765	0.00269878		SARS_SF1_100_mono_-1.ct	Sun_Reactivities_top_27_percent_constrained.DBN	0.150054	0.44177	0.150054	0.44177	0.00298578
SARS_SF1_100_mono_-1.ct	Rouskin_DMS_SARS2_Reactivity_top_28_percent_constrained.DBN	0.0754009	0.220641	0.147859	0.49716	0.00349254		SARS_SF1_100_mono_-1.ct	Incarnato_SHAPE_SARS2_in_vitro_Reactivity_top_28_percent_constrained.DBN	0.178225	0.409727	0.182378	0.419276	0.00363083		SARS_SF1_100_mono_-1.ct	SHAPE_in_vivo_Incar_top_28_percent_constrained.DBN	0.188902	0.403709	0.190886	0.407453	0.00301661		SARS_SF1_100_mono_-1.ct	Incar_DMS_invitro_Reactivities_top_28_percent_constrained.DBN	0.0859885	0.203643	0.169541	0.461907	0.00356905		SARS_SF1_100_mono_-1.ct	Pyle_SHAPE_SARS2_Reactivity_top_28_percent_constrained.DBN	0.22775	0.353367	0.228477	0.353539	0.00284024		SARS_SF1_100_mono_-1.ct	Sun_Reactivities_top_28_percent_constrained.DBN	0.156245	0.457222	0.156245	0.457222	0.00283053
SARS_SF1_100_mono_-1.ct	Rouskin_DMS_SARS2_Reactivity_top_29_percent_constrained.DBN	0.0789264	0.22731	0.154773	0.512186	0.00354098		SARS_SF1_100_mono_-1.ct	Incarnato_SHAPE_SARS2_in_vitro_Reactivity_top_29_percent_constrained.DBN	0.186517	0.421601	0.190864	0.431426	0.00366083		SARS_SF1_100_mono_-1.ct	SHAPE_in_vivo_Incar_top_29_percent_constrained.DBN	0.197592	0.415338	0.199667	0.419191	0.00368091		SARS_SF1_100_mono_-1.ct	Incar_DMS_invitro_Reactivities_top_29_percent_constrained.DBN	0.0901914	0.209336	0.177828	0.47482	0.00393468		SARS_SF1_100_mono_-1.ct	Pyle_SHAPE_SARS2_Reactivity_top_29_percent_constrained.DBN	0.236838	0.364671	0.237593	0.364849	0.00332607		SARS_SF1_100_mono_-1.ct	Sun_Reactivities_top_29_percent_constrained.DBN	0.163287	0.471454	0.163287	0.471454	0.00332029
SARS_SF1_100_mono_-1.ct	Rouskin_DMS_SARS2_Reactivity_top_30_percent_constrained.DBN	0.0822814	0.234304	0.161351	0.527946	0.00347333		SARS_SF1_100_mono_-1.ct	Incarnato_SHAPE_SARS2_in_vitro_Reactivity_top_30_percent_constrained.DBN	0.195831	0.43201	0.200395	0.442079	0.0042137		SARS_SF1_100_mono_-1.ct	SHAPE_in_vivo_Incar_top_30_percent_constrained.DBN	0.205827	0.427619	0.207989	0.431585	0.00359159		SARS_SF1_100_mono_-1.ct	Incar_DMS_invitro_Reactivities_top_30_percent_constrained.DBN	0.0939399	0.215599	0.185218	0.489024	0.00361429		SARS_SF1_100_mono_-1.ct	Pyle_SHAPE_SARS2_Reactivity_top_30_percent_constrained.DBN	0.245187	0.376952	0.245969	0.377136	0.00315874		SARS_SF1_100_mono_-1.ct	Sun_Reactivities_top_30_percent_constrained.DBN	0.169932	0.486256	0.169932	0.486256	0.00323121
SARS_SF1_100_mono_-1.ct	Rouskin_DMS_SARS2_Reactivity_top_31_percent_constrained.DBN	0.0861481	0.240485	0.168934	0.541873	0.00410876		SARS_SF1_100_mono_-1.ct	Incarnato_SHAPE_SARS2_in_vitro_Reactivity_top_31_percent_constrained.DBN	0.203783	0.444372	0.208532	0.454729	0.00369999		SARS_SF1_100_mono_-1.ct	SHAPE_in_vivo_Incar_top_31_percent_constrained.DBN	0.214006	0.43998	0.216253	0.444061	0.00366993		SARS_SF1_100_mono_-1.ct	Incar_DMS_invitro_Reactivities_top_31_percent_constrained.DBN	0.097518	0.222186	0.192273	0.503966	0.00355542		SARS_SF1_100_mono_-1.ct	Pyle_SHAPE_SARS2_Reactivity_top_31_percent_constrained.DBN	0.254047	0.388582	0.254857	0.388771	0.00345555		SARS_SF1_100_mono_-1.ct	Sun_Reactivities_top_31_percent_constrained.DBN	0.176237	0.501545	0.176237	0.501545	0.0031619
SARS_SF1_100_mono_-1.ct	Rouskin_DMS_SARS2_Reactivity_top_32_percent_constrained.DBN	0.0896736	0.247154	0.175847	0.556899	0.00385011		SARS_SF1_100_mono_-1.ct	Incarnato_SHAPE_SARS2_in_vitro_Reactivity_top_32_percent_constrained.DBN	0.211904	0.45649	0.216843	0.467129	0.00388233		SARS_SF1_100_mono_-1.ct	SHAPE_in_vivo_Incar_top_32_percent_constrained.DBN	0.222468	0.451936	0.224805	0.456127	0.00390054		SARS_SF1_100_mono_-1.ct	Incar_DMS_invitro_Reactivities_top_32_percent_constrained.DBN	0.101834	0.227635	0.200784	0.516325	0.00439426		SARS_SF1_100_mono_-1.ct	Pyle_SHAPE_SARS2_Reactivity_top_32_percent_constrained.DBN	0.262509	0.400699	0.263347	0.400895	0.00340342		SARS_SF1_100_mono_-1.ct	Sun_Reactivities_top_32_percent_constrained.DBN	0.183109	0.516021	0.183109	0.516021	0.00354624
SARS_SF1_100_mono_-1.ct	Rouskin_DMS_SARS2_Reactivity_top_33_percent_constrained.DBN	0.093654	0.253172	0.183653	0.57046	0.00445274		SARS_SF1_100_mono_-1.ct	Incarnato_SHAPE_SARS2_in_vitro_Reactivity_top_33_percent_constrained.DBN	0.220537	0.467876	0.225677	0.47878	0.0042296		SARS_SF1_100_mono_-1.ct	SHAPE_in_vivo_Incar_top_33_percent_constrained.DBN	0.232067	0.462264	0.234504	0.466552	0.00452521		SARS_SF1_100_mono_-1.ct	Incar_DMS_invitro_Reactivities_top_33_percent_constrained.DBN	0.105072	0.23471	0.207167	0.532374	0.00339813		SARS_SF1_100_mono_-1.ct	Pyle_SHAPE_SARS2_Reactivity_top_33_percent_constrained.DBN	0.270461	0.41363	0.271324	0.413832	0.00330104		SARS_SF1_100_mono_-1.ct	Sun_Reactivities_top_33_percent_constrained.DBN	0.191401	0.528465	0.191401	0.528465	0.00438211
SARS_SF1_100_mono_-1.ct	Rouskin_DMS_SARS2_Reactivity_top_34_percent_constrained.DBN	0.097407	0.259515	0.191012	0.584754	0.00430349		SARS_SF1_100_mono_-1.ct	Incarnato_SHAPE_SARS2_in_vitro_Reactivity_top_34_percent_constrained.DBN	0.228659	0.479993	0.233988	0.49118	0.00408222		SARS_SF1_100_mono_-1.ct	SHAPE_in_vivo_Incar_top_34_percent_constrained.DBN	0.240416	0.474382	0.242941	0.478782	0.00403931		SARS_SF1_100_mono_-1.ct	Incar_DMS_invitro_Reactivities_top_34_percent_constrained.DBN	0.108877	0.240891	0.21467	0.546394	0.00409948		SARS_SF1_100_mono_-1.ct	Pyle_SHAPE_SARS2_Reactivity_top_34_percent_constrained.DBN	0.279605	0.424772	0.280497	0.42498	0.00389845		SARS_SF1_100_mono_-1.ct	Sun_Reactivities_top_34_percent_constrained.DBN	0.199864	0.540664	0.199864	0.540664	0.00457539
SARS_SF1_100_mono_-1.ct	Rouskin_DMS_SARS2_Reactivity_top_35_percent_constrained.DBN	0.101899	0.264883	0.199822	0.596848	0.00525769		SARS_SF1_100_mono_-1.ct	Incarnato_SHAPE_SARS2_in_vitro_Reactivity_top_35_percent_constrained.DBN	0.237917	0.490485	0.243462	0.501916	0.00475487		SARS_SF1_100_mono_-1.ct	SHAPE_in_vivo_Incar_top_35_percent_constrained.DBN	0.249276	0.485768	0.251894	0.490273	0.0043895		SARS_SF1_100_mono_-1.ct	Incar_DMS_invitro_Reactivities_top_35_percent_constrained.DBN	0.112796	0.246991	0.222396	0.560229	0.00432876		SARS_SF1_100_mono_-1.ct	Pyle_SHAPE_SARS2_Reactivity_top_35_percent_constrained.DBN	0.288578	0.436158	0.289499	0.436371	0.00392836		SARS_SF1_100_mono_-1.ct	Sun_Reactivities_top_35_percent_constrained.DBN	0.206906	0.554896	0.206906	0.554896	0.00390794
SARS_SF1_100_mono_-1.ct	Rouskin_DMS_SARS2_Reactivity_top_36_percent_constrained.DBN	0.106278	0.270332	0.208408	0.609126	0.00523001		SARS_SF1_100_mono_-1.ct	Incarnato_SHAPE_SARS2_in_vitro_Reactivity_top_36_percent_constrained.DBN	0.245925	0.502765	0.251656	0.514482	0.00421609		SARS_SF1_100_mono_-1.ct	SHAPE_in_vivo_Incar_top_36_percent_constrained.DBN	0.257625	0.497967	0.260331	0.502586	0.00424013		SARS_SF1_100_mono_-1.ct	Incar_DMS_invitro_Reactivities_top_36_percent_constrained.DBN	0.117056	0.252521	0.230795	0.572773	0.00481052		SARS_SF1_100_mono_-1.ct	Pyle_SHAPE_SARS2_Reactivity_top_36_percent_constrained.DBN	0.2967	0.448845	0.297647	0.449064	0.00365883		SARS_SF1_100_mono_-1.ct	Sun_Reactivities_top_36_percent_constrained.DBN	0.215142	0.56742	0.215142	0.56742	0.00467291
SARS_SF1_100_mono_-1.ct	Rouskin_DMS_SARS2_Reactivity_top_37_percent_constrained.DBN	0.110372	0.276187	0.216436	0.62232	0.00499632		SARS_SF1_100_mono_-1.ct	Incarnato_SHAPE_SARS2_in_vitro_Reactivity_top_37_percent_constrained.DBN	0.253422	0.515777	0.259328	0.527798	0.00404913		SARS_SF1_100_mono_-1.ct	SHAPE_in_vivo_Incar_top_37_percent_constrained.DBN	0.266031	0.510003	0.268825	0.514734	0.00437216		SARS_SF1_100_mono_-1.ct	Incar_DMS_invitro_Reactivities_top_37_percent_constrained.DBN	0.120861	0.258783	0.238298	0.586977	0.00440397		SARS_SF1_100_mono_-1.ct	Pyle_SHAPE_SARS2_Reactivity_top_37_percent_constrained.DBN	0.305844	0.459987	0.30682	0.460212	0.00422164		SARS_SF1_100_mono_-1.ct	Sun_Reactivities_top_37_percent_constrained.DBN	0.222866	0.580677	0.222866	0.580677	0.00448526
SARS_SF1_100_mono_-1.ct	Rouskin_DMS_SARS2_Reactivity_top_38_percent_constrained.DBN	0.11475	0.281718	0.225022	0.634781	0.00545028		SARS_SF1_100_mono_-1.ct	Incarnato_SHAPE_SARS2_in_vitro_Reactivity_top_38_percent_constrained.DBN	0.262566	0.526431	0.268685	0.5387	0.00504073		SARS_SF1_100_mono_-1.ct	SHAPE_in_vivo_Incar_top_38_percent_constrained.DBN	0.275231	0.520901	0.278122	0.525733	0.00488801		SARS_SF1_100_mono_-1.ct	Incar_DMS_invitro_Reactivities_top_38_percent_constrained.DBN	0.125007	0.264476	0.246473	0.599889	0.00490391		SARS_SF1_100_mono_-1.ct	Pyle_SHAPE_SARS2_Reactivity_top_38_percent_constrained.DBN	0.315272	0.470804	0.316278	0.471033	0.0044551		SARS_SF1_100_mono_-1.ct	Sun_Reactivities_top_38_percent_constrained.DBN	0.231272	0.592957	0.231272	0.592957	0.00498425
SARS_SF1_100_mono_-1.ct	Rouskin_DMS_SARS2_Reactivity_top_39_percent_constrained.DBN	0.119584	0.286516	0.2345	0.645593	0.00611902		SARS_SF1_100_mono_-1.ct	Incarnato_SHAPE_SARS2_in_vitro_Reactivity_top_39_percent_constrained.DBN	0.270858	0.538305	0.277171	0.550851	0.0046742		SARS_SF1_100_mono_-1.ct	SHAPE_in_vivo_Incar_top_39_percent_constrained.DBN	0.283921	0.532531	0.286903	0.53747	0.00471952		SARS_SF1_100_mono_-1.ct	Incar_DMS_invitro_Reactivities_top_39_percent_constrained.DBN	0.129494	0.269763	0.255319	0.61188	0.00541305		SARS_SF1_100_mono_-1.ct	Pyle_SHAPE_SARS2_Reactivity_top_39_percent_constrained.DBN	0.325041	0.481051	0.326078	0.481286	0.0047166		SARS_SF1_100_mono_-1.ct	Sun_Reactivities_top_39_percent_constrained.DBN	0.239109	0.606051	0.239109	0.606051	0.0047501
SARS_SF1_100_mono_-1.ct	Rouskin_DMS_SARS2_Reactivity_top_40_percent_constrained.DBN	0.124645	0.290989	0.244425	0.655672	0.006507		SARS_SF1_100_mono_-1.ct	Incarnato_SHAPE_SARS2_in_vitro_Reactivity_top_40_percent_constrained.DBN	0.279434	0.549772	0.285947	0.562585	0.00493725		SARS_SF1_100_mono_-1.ct	SHAPE_in_vivo_Incar_top_40_percent_constrained.DBN	0.292668	0.544079	0.295742	0.549126	0.00485338		SARS_SF1_100_mono_-1.ct	Incar_DMS_invitro_Reactivities_top_40_percent_constrained.DBN	0.133981	0.274967	0.264166	0.623686	0.00551749		SARS_SF1_100_mono_-1.ct	Pyle_SHAPE_SARS2_Reactivity_top_40_percent_constrained.DBN	0.333617	0.493006	0.334682	0.493247	0.00424365		SARS_SF1_100_mono_-1.ct	Sun_Reactivities_top_40_percent_constrained.DBN	0.247856	0.617843	0.247856	0.617843	0.00540398
SARS_SF1_100_mono_-1.ct	Rouskin_DMS_SARS2_Reactivity_top_41_percent_constrained.DBN	0.129478	0.295787	0.253903	0.666483	0.00631703		SARS_SF1_100_mono_-1.ct	Incarnato_SHAPE_SARS2_in_vitro_Reactivity_top_41_percent_constrained.DBN	0.288806	0.560101	0.295536	0.573154	0.00549637		SARS_SF1_100_mono_-1.ct	SHAPE_in_vivo_Incar_top_41_percent_constrained.DBN	0.302096	0.554652	0.305269	0.559796	0.00533323		SARS_SF1_100_mono_-1.ct	Incar_DMS_invitro_Reactivities_top_41_percent_constrained.DBN	0.138752	0.279847	0.273572	0.634754	0.00597081		SARS_SF1_100_mono_-1.ct	Pyle_SHAPE_SARS2_Reactivity_top_41_percent_constrained.DBN	0.342705	0.50431	0.343798	0.504557	0.00459968		SARS_SF1_100_mono_-1.ct	Sun_Reactivities_top_41_percent_constrained.DBN	0.256716	0.629473	0.256716	0.629473	0.0055772
SARS_SF1_100_mono_-1.ct	Rouskin_DMS_SARS2_Reactivity_top_42_percent_constrained.DBN	0.134482	0.300342	0.263715	0.676745	0.00664068		SARS_SF1_100_mono_-1.ct	Incarnato_SHAPE_SARS2_in_vitro_Reactivity_top_42_percent_constrained.DBN	0.298802	0.569535	0.305765	0.582808	0.00596154		SARS_SF1_100_mono_-1.ct	SHAPE_in_vivo_Incar_top_42_percent_constrained.DBN	0.311921	0.564655	0.315197	0.569892	0.00565837		SARS_SF1_100_mono_-1.ct	Incar_DMS_invitro_Reactivities_top_42_percent_constrained.DBN	0.143352	0.284889	0.282643	0.646191	0.0058613		SARS_SF1_100_mono_-1.ct	Pyle_SHAPE_SARS2_Reactivity_top_42_percent_constrained.DBN	0.351451	0.516021	0.352573	0.516273	0.00453		SARS_SF1_100_mono_-1.ct	Sun_Reactivities_top_42_percent_constrained.DBN	0.265349	0.641428	0.265349	0.641428	0.0055374
SARS_SF1_100_mono_-1.ct	Rouskin_DMS_SARS2_Reactivity_top_43_percent_constrained.DBN	0.139088	0.305547	0.272748	0.688474	0.00621837		SARS_SF1_100_mono_-1.ct	Incarnato_SHAPE_SARS2_in_vitro_Reactivity_top_43_percent_constrained.DBN	0.308684	0.579131	0.315878	0.592629	0.00599311		SARS_SF1_100_mono_-1.ct	SHAPE_in_vivo_Incar_top_43_percent_constrained.DBN	0.320157	0.576936	0.323519	0.582287	0.00484571		SARS_SF1_100_mono_-1.ct	Incar_DMS_invitro_Reactivities_top_43_percent_constrained.DBN	0.147953	0.290013	0.291713	0.657812	0.00596672		SARS_SF1_100_mono_-1.ct	Pyle_SHAPE_SARS2_Reactivity_top_43_percent_constrained.DBN	0.359857	0.528302	0.361005	0.52856	0.00445712		SARS_SF1_100_mono_-1.ct	Sun_Reactivities_top_43_percent_constrained.DBN	0.275345	0.651431	0.275345	0.651431	0.00651172
SARS_SF1_100_mono_-1.ct	Rouskin_DMS_SARS2_Reactivity_top_44_percent_constrained.DBN	0.143978	0.310264	0.282337	0.699102	0.00670415		SARS_SF1_100_mono_-1.ct	Incarnato_SHAPE_SARS2_in_vitro_Reactivity_top_44_percent_constrained.DBN	0.318794	0.588403	0.326223	0.602116	0.00622903		SARS_SF1_100_mono_-1.ct	SHAPE_in_vivo_Incar_top_44_percent_constrained.DBN	0.329528	0.587589	0.332989	0.593039	0.0056159		SARS_SF1_100_mono_-1.ct	Incar_DMS_invitro_Reactivities_top_44_percent_constrained.DBN	0.152383	0.295299	0.300448	0.669803	0.00585046		SARS_SF1_100_mono_-1.ct	Pyle_SHAPE_SARS2_Reactivity_top_44_percent_constrained.DBN	0.369399	0.538874	0.370577	0.539138	0.00516068		SARS_SF1_100_mono_-1.ct	Sun_Reactivities_top_44_percent_constrained.DBN	0.284603	0.662492	0.284603	0.662492	0.00613314
SARS_SF1_100_mono_-1.ct	Rouskin_DMS_SARS2_Reactivity_top_45_percent_constrained.DBN	0.148698	0.315224	0.291592	0.71028	0.00657374		SARS_SF1_100_mono_-1.ct	Incarnato_SHAPE_SARS2_in_vitro_Reactivity_top_45_percent_constrained.DBN	0.327711	0.599382	0.335348	0.613351	0.00559666		SARS_SF1_100_mono_-1.ct	SHAPE_in_vivo_Incar_top_45_percent_constrained.DBN	0.339865	0.596861	0.343434	0.602397	0.00629225		SARS_SF1_100_mono_-1.ct	Incar_DMS_invitro_Reactivities_top_45_percent_constrained.DBN	0.157153	0.300179	0.309854	0.680871	0.00640461		SARS_SF1_100_mono_-1.ct	Pyle_SHAPE_SARS2_Reactivity_top_45_percent_constrained.DBN	0.377918	0.550911	0.379124	0.55118	0.00471067		SARS_SF1_100_mono_-1.ct	Sun_Reactivities_top_45_percent_constrained.DBN	0.29494	0.672007	0.29494	0.672007	0.0069464
SARS_SF1_100_mono_-1.ct	Rouskin_DMS_SARS2_Reactivity_top_46_percent_constrained.DBN	0.1541	0.319291	0.302186	0.719443	0.00762122		SARS_SF1_100_mono_-1.ct	Incarnato_SHAPE_SARS2_in_vitro_Reactivity_top_46_percent_constrained.DBN	0.337536	0.60906	0.345403	0.623254	0.00626659		SARS_SF1_100_mono_-1.ct	SHAPE_in_vivo_Incar_top_46_percent_constrained.DBN	0.349066	0.607759	0.352732	0.613396	0.00570306		SARS_SF1_100_mono_-1.ct	Incar_DMS_invitro_Reactivities_top_46_percent_constrained.DBN	0.162095	0.304733	0.319597	0.691201	0.00673398		SARS_SF1_100_mono_-1.ct	Pyle_SHAPE_SARS2_Reactivity_top_46_percent_constrained.DBN	0.387346	0.561727	0.388582	0.562002	0.0053155		SARS_SF1_100_mono_-1.ct	Sun_Reactivities_top_46_percent_constrained.DBN	0.304538	0.68258	0.304538	0.68258	0.00655171
SARS_SF1_100_mono_-1.ct	Rouskin_DMS_SARS2_Reactivity_top_47_percent_constrained.DBN	0.158876	0.32417	0.311552	0.730438	0.00684175		SARS_SF1_100_mono_-1.ct	Incarnato_SHAPE_SARS2_in_vitro_Reactivity_top_47_percent_constrained.DBN	0.347135	0.619063	0.355225	0.633491	0.00622225		SARS_SF1_100_mono_-1.ct	SHAPE_in_vivo_Incar_top_47_percent_constrained.DBN	0.358494	0.618331	0.362259	0.624066	0.00594554		SARS_SF1_100_mono_-1.ct	Incar_DMS_invitro_Reactivities_top_47_percent_constrained.DBN	0.16749	0.308718	0.330235	0.70024	0.00744936		SARS_SF1_100_mono_-1.ct	Pyle_SHAPE_SARS2_Reactivity_top_47_percent_constrained.DBN	0.396831	0.572381	0.398097	0.572661	0.00544894		SARS_SF1_100_mono_-1.ct	Sun_Reactivities_top_47_percent_constrained.DBN	0.314364	0.692827	0.314364	0.692827	0.00680747
SARS_SF1_100_mono_-1.ct	Rouskin_DMS_SARS2_Reactivity_top_48_percent_constrained.DBN	0.163994	0.328562	0.321588	0.740334	0.00742975		SARS_SF1_100_mono_-1.ct	Incarnato_SHAPE_SARS2_in_vitro_Reactivity_top_48_percent_constrained.DBN	0.357301	0.628253	0.365628	0.642895	0.00668826		SARS_SF1_100_mono_-1.ct	SHAPE_in_vivo_Incar_top_48_percent_constrained.DBN	0.368603	0.627928	0.372475	0.633752	0.00647428		SARS_SF1_100_mono_-1.ct	Incar_DMS_invitro_Reactivities_top_48_percent_constrained.DBN	0.172147	0.313679	0.339418	0.711492	0.0065333		SARS_SF1_100_mono_-1.ct	Pyle_SHAPE_SARS2_Reactivity_top_48_percent_constrained.DBN	0.405861	0.583767	0.407156	0.584052	0.00529111		SARS_SF1_100_mono_-1.ct	Sun_Reactivities_top_48_percent_constrained.DBN	0.32436	0.70283	0.32436	0.70283	0.00702551
SARS_SF1_100_mono_-1.ct	Rouskin_DMS_SARS2_Reactivity_top_49_percent_constrained.DBN	0.168827	0.33336	0.331066	0.751145	0.00711946		SARS_SF1_100_mono_-1.ct	Incarnato_SHAPE_SARS2_in_vitro_Reactivity_top_49_percent_constrained.DBN	0.368206	0.636386	0.376787	0.651217	0.00726687		SARS_SF1_100_mono_-1.ct	SHAPE_in_vivo_Incar_top_49_percent_constrained.DBN	0.378202	0.638256	0.382174	0.644176	0.00624804		SARS_SF1_100_mono_-1.ct	Incar_DMS_invitro_Reactivities_top_49_percent_constrained.DBN	0.176918	0.318559	0.348824	0.72256	0.00679676		SARS_SF1_100_mono_-1.ct	Pyle_SHAPE_SARS2_Reactivity_top_49_percent_constrained.DBN	0.415005	0.594909	0.41633	0.595199	0.00545992		SARS_SF1_100_mono_-1.ct	Sun_Reactivities_top_49_percent_constrained.DBN	0.334242	0.712996	0.334242	0.712996	0.00704614
SARS_SF1_100_mono_-1.ct	Rouskin_DMS_SARS2_Reactivity_top_50_percent_constrained.DBN	0.174173	0.337427	0.341548	0.760308	0.00796933		SARS_SF1_100_mono_-1.ct	Incarnato_SHAPE_SARS2_in_vitro_Reactivity_top_50_percent_constrained.DBN	0.37877	0.645007	0.387597	0.660039	0.00713514		SARS_SF1_100_mono_-1.ct	SHAPE_in_vivo_Incar_top_50_percent_constrained.DBN	0.387573	0.648992	0.391644	0.655011	0.00620276		SARS_SF1_100_mono_-1.ct	Incar_DMS_invitro_Reactivities_top_50_percent_constrained.DBN	0.182541	0.322219	0.35991	0.730861	0.0081025		SARS_SF1_100_mono_-1.ct	Pyle_SHAPE_SARS2_Reactivity_top_50_percent_constrained.DBN	0.425172	0.604587	0.426528	0.604882	0.0061691		SARS_SF1_100_mono_-1.ct	Sun_Reactivities_top_50_percent_constrained.DBN	0.344295	0.722999	0.344295	0.722999	0.00726818
SARS_SF1_100_mono_-1.ct	Rouskin_DMS_SARS2_Reactivity_top_51_percent_constrained.DBN	0.179347	0.341818	0.351695	0.770203	0.0078154		SARS_SF1_100_mono_-1.ct	Incarnato_SHAPE_SARS2_in_vitro_Reactivity_top_51_percent_constrained.DBN	0.388709	0.65444	0.397768	0.669693	0.00681136		SARS_SF1_100_mono_-1.ct	SHAPE_in_vivo_Incar_top_51_percent_constrained.DBN	0.397456	0.658913	0.40163	0.665025	0.00664109		SARS_SF1_100_mono_-1.ct	Incar_DMS_invitro_Reactivities_top_51_percent_constrained.DBN	0.187539	0.326692	0.369765	0.741007	0.0073022		SARS_SF1_100_mono_-1.ct	Pyle_SHAPE_SARS2_Reactivity_top_51_percent_constrained.DBN	0.433578	0.616867	0.434961	0.617168	0.00520431		SARS_SF1_100_mono_-1.ct	Sun_Reactivities_top_51_percent_constrained.DBN	0.354404	0.73284	0.354404	0.73284	0.00740873
SARS_SF1_100_mono_-1.ct	Rouskin_DMS_SARS2_Reactivity_top_52_percent_constrained.DBN	0.184408	0.346291	0.361619	0.780282	0.00774366		SARS_SF1_100_mono_-1.ct	Incarnato_SHAPE_SARS2_in_vitro_Reactivity_top_52_percent_constrained.DBN	0.398535	0.664118	0.407823	0.679596	0.00683309		SARS_SF1_100_mono_-1.ct	SHAPE_in_vivo_Incar_top_52_percent_constrained.DBN	0.407338	0.668835	0.411616	0.675039	0.00674109		SARS_SF1_100_mono_-1.ct	Incar_DMS_invitro_Reactivities_top_52_percent_constrained.DBN	0.192878	0.330758	0.380291	0.750231	0.00789716		SARS_SF1_100_mono_-1.ct	Pyle_SHAPE_SARS2_Reactivity_top_52_percent_constrained.DBN	0.442324	0.628578	0.443735	0.628885	0.00551811		SARS_SF1_100_mono_-1.ct	Sun_Reactivities_top_52_percent_constrained.DBN	0.364968	0.74203	0.364968	0.74203	0.00783879
SARS_SF1_100_mono_-1.ct	Rouskin_DMS_SARS2_Reactivity_top_53_percent_constrained.DBN	0.189583	0.350602	0.371766	0.789995	0.00801622		SARS_SF1_100_mono_-1.ct	Incarnato_SHAPE_SARS2_in_vitro_Reactivity_top_53_percent_constrained.DBN	0.408928	0.672983	0.418459	0.688668	0.00732455		SARS_SF1_100_mono_-1.ct	SHAPE_in_vivo_Incar_top_53_percent_constrained.DBN	0.418413	0.677049	0.422808	0.683329	0.00764745		SARS_SF1_100_mono_-1.ct	Incar_DMS_invitro_Reactivities_top_53_percent_constrained.DBN	0.19816	0.334824	0.390705	0.759454	0.00790921		SARS_SF1_100_mono_-1.ct	Pyle_SHAPE_SARS2_Reactivity_top_53_percent_constrained.DBN	0.451866	0.639232	0.453308	0.639544	0.00612179		SARS_SF1_100_mono_-1.ct	Sun_Reactivities_top_53_percent_constrained.DBN	0.375987	0.750569	0.375987	0.750569	0.00827003
SARS_SF1_100_mono_-1.ct	Rouskin_DMS_SARS2_Reactivity_top_54_percent_constrained.DBN	0.195042	0.354587	0.382471	0.798974	0.0085528		SARS_SF1_100_mono_-1.ct	Incarnato_SHAPE_SARS2_in_vitro_Reactivity_top_54_percent_constrained.DBN	0.419947	0.680953	0.429734	0.696823	0.00785678		SARS_SF1_100_mono_-1.ct	SHAPE_in_vivo_Incar_top_54_percent_constrained.DBN	0.428409	0.686809	0.432909	0.693179	0.00700181		SARS_SF1_100_mono_-1.ct	Incar_DMS_invitro_Reactivities_top_54_percent_constrained.DBN	0.203612	0.338728	0.401456	0.768308	0.00825953		SARS_SF1_100_mono_-1.ct	Pyle_SHAPE_SARS2_Reactivity_top_54_percent_constrained.DBN	0.461975	0.648992	0.463449	0.649308	0.0065852		SARS_SF1_100_mono_-1.ct	Sun_Reactivities_top_54_percent_constrained.DBN	0.387005	0.759109	0.387005	0.759109	0.00836412
SARS_SF1_100_mono_-1.ct	Rouskin_DMS_SARS2_Reactivity_top_55_percent_constrained.DBN	0.200671	0.358247	0.39351	0.80722	0.0089111		SARS_SF1_100_mono_-1.ct	Incarnato_SHAPE_SARS2_in_vitro_Reactivity_top_55_percent_constrained.DBN	0.431249	0.688517	0.4413	0.704563	0.00814879		SARS_SF1_100_mono_-1.ct	SHAPE_in_vivo_Incar_top_55_percent_constrained.DBN	0.438121	0.696975	0.442723	0.703439	0.00690359		SARS_SF1_100_mono_-1.ct	Incar_DMS_invitro_Reactivities_top_55_percent_constrained.DBN	0.208781	0.342957	0.411646	0.777901	0.0079271		SARS_SF1_100_mono_-1.ct	Pyle_SHAPE_SARS2_Reactivity_top_55_percent_constrained.DBN	0.471631	0.659483	0.473135	0.659805	0.00639091		SARS_SF1_100_mono_-1.ct	Sun_Reactivities_top_55_percent_constrained.DBN	0.39808	0.767567	0.39808	0.767567	0.00850091
SARS_SF1_100_mono_-1.ct	Rouskin_DMS_SARS2_Reactivity_top_56_percent_constrained.DBN	0.206016	0.362313	0.403992	0.816383	0.00855709		SARS_SF1_100_mono_-1.ct	Incarnato_SHAPE_SARS2_in_vitro_Reactivity_top_56_percent_constrained.DBN	0.441756	0.697219	0.452052	0.713468	0.00767125		SARS_SF1_100_mono_-1.ct	SHAPE_in_vivo_Incar_top_56_percent_constrained.DBN	0.448458	0.706246	0.453168	0.712797	0.00744542		SARS_SF1_100_mono_-1.ct	Incar_DMS_invitro_Reactivities_top_56_percent_constrained.DBN	0.213779	0.347511	0.421501	0.788231	0.00776756		SARS_SF1_100_mono_-1.ct	Pyle_SHAPE_SARS2_Reactivity_top_56_percent_constrained.DBN	0.481513	0.669567	0.483049	0.669894	0.00664131		SARS_SF1_100_mono_-1.ct	Sun_Reactivities_top_56_percent_constrained.DBN	0.408701	0.776675	0.408701	0.776675	0.00824889
SARS_SF1_100_mono_-1.ct	Rouskin_DMS_SARS2_Reactivity_top_57_percent_constrained.DBN	0.212612	0.36459	0.416927	0.821514	0.0106262		SARS_SF1_100_mono_-1.ct	Incarnato_SHAPE_SARS2_in_vitro_Reactivity_top_57_percent_constrained.DBN	0.452207	0.706002	0.462746	0.722456	0.0077259		SARS_SF1_100_mono_-1.ct	SHAPE_in_vivo_Incar_top_57_percent_constrained.DBN	0.459306	0.714785	0.46413	0.721415	0.00790807		SARS_SF1_100_mono_-1.ct	Incar_DMS_invitro_Reactivities_top_57_percent_constrained.DBN	0.219515	0.350927	0.432811	0.795979	0.00900267		SARS_SF1_100_mono_-1.ct	Pyle_SHAPE_SARS2_Reactivity_top_57_percent_constrained.DBN	0.491282	0.679815	0.492849	0.680146	0.00666544		SARS_SF1_100_mono_-1.ct	Sun_Reactivities_top_57_percent_constrained.DBN	0.419379	0.785703	0.419379	0.785703	0.0083894
SARS_SF1_100_mono_-1.ct	Rouskin_DMS_SARS2_Reactivity_top_58_percent_constrained.DBN	0.218469	0.367925	0.428412	0.829027	0.00952161		SARS_SF1_100_mono_-1.ct	Incarnato_SHAPE_SARS2_in_vitro_Reactivity_top_58_percent_constrained.DBN	0.463736	0.71324	0.474544	0.729863	0.00861107		SARS_SF1_100_mono_-1.ct	SHAPE_in_vivo_Incar_top_58_percent_constrained.DBN	0.470324	0.723081	0.475264	0.729787	0.0081255		SARS_SF1_100_mono_-1.ct	Incar_DMS_invitro_Reactivities_top_58_percent_constrained.DBN	0.224967	0.354831	0.443561	0.804833	0.00865218		SARS_SF1_100_mono_-1.ct	Pyle_SHAPE_SARS2_Reactivity_top_58_percent_constrained.DBN	0.500596	0.690794	0.502194	0.691131	0.00645806		SARS_SF1_100_mono_-1.ct	Sun_Reactivities_top_58_percent_constrained.DBN	0.431135	0.793185	0.431135	0.793185	0.00932523
SARS_SF1_100_mono_-1.ct	Rouskin_DMS_SARS2_Reactivity_top_59_percent_constrained.DBN	0.22444	0.371178	0.44012	0.836357	0.00979232		SARS_SF1_100_mono_-1.ct	Incarnato_SHAPE_SARS2_in_vitro_Reactivity_top_59_percent_constrained.DBN	0.474925	0.720966	0.485993	0.737769	0.00844708		SARS_SF1_100_mono_-1.ct	SHAPE_in_vivo_Incar_top_59_percent_constrained.DBN	0.480718	0.732271	0.485767	0.739063	0.00776219		SARS_SF1_100_mono_-1.ct	Incar_DMS_invitro_Reactivities_top_59_percent_constrained.DBN	0.230817	0.358084	0.455095	0.812212	0.00936818		SARS_SF1_100_mono_-1.ct	Pyle_SHAPE_SARS2_Reactivity_top_59_percent_constrained.DBN	0.509229	0.702668	0.510854	0.703011	0.00608841		SARS_SF1_100_mono_-1.ct	Sun_Reactivities_top_59_percent_constrained.DBN	0.442154	0.801724	0.442154	0.801724	0.00883367
SARS_SF1_100_mono_-1.ct	Rouskin_DMS_SARS2_Reactivity_top_60_percent_constrained.DBN	0.230183	0.374675	0.451383	0.844237	0.00950802		SARS_SF1_100_mono_-1.ct	Incarnato_SHAPE_SARS2_in_vitro_Reactivity_top_60_percent_constrained.DBN	0.485943	0.728936	0.497268	0.745925	0.0084104		SARS_SF1_100_mono_-1.ct	SHAPE_in_vivo_Incar_top_60_percent_constrained.DBN	0.492134	0.739997	0.497303	0.74686	0.00861564		SARS_SF1_100_mono_-1.ct	Incar_DMS_invitro_Reactivities_top_60_percent_constrained.DBN	0.236383	0.361825	0.466069	0.820697	0.00900653		SARS_SF1_100_mono_-1.ct	Pyle_SHAPE_SARS2_Reactivity_top_60_percent_constrained.DBN	0.518089	0.714297	0.519742	0.714646	0.00635205		SARS_SF1_100_mono_-1.ct	Sun_Reactivities_top_60_percent_constrained.DBN	0.454024	0.809044	0.454024	0.809044	0.00960357
SARS_SF1_100_mono_-1.ct	Rouskin_DMS_SARS2_Reactivity_top_61_percent_constrained.DBN	0.236495	0.377358	0.46376	0.850284	0.0105243		SARS_SF1_100_mono_-1.ct	Incarnato_SHAPE_SARS2_in_vitro_Reactivity_top_61_percent_constrained.DBN	0.496053	0.738208	0.507614	0.755412	0.00781491		SARS_SF1_100_mono_-1.ct	SHAPE_in_vivo_Incar_top_61_percent_constrained.DBN	0.502811	0.74878	0.508092	0.755725	0.00815406		SARS_SF1_100_mono_-1.ct	Incar_DMS_invitro_Reactivities_top_61_percent_constrained.DBN	0.24212	0.365241	0.47738	0.828445	0.00936987		SARS_SF1_100_mono_-1.ct	Pyle_SHAPE_SARS2_Reactivity_top_61_percent_constrained.DBN	0.528142	0.724138	0.529827	0.724491	0.00730642		SARS_SF1_100_mono_-1.ct	Sun_Reactivities_top_61_percent_constrained.DBN	0.465042	0.817583	0.465042	0.817583	0.00900841
SARS_SF1_100_mono_-1.ct	Rouskin_DMS_SARS2_Reactivity_top_62_percent_constrained.DBN	0.242124	0.3811	0.474799	0.858714	0.00947955		SARS_SF1_100_mono_-1.ct	Incarnato_SHAPE_SARS2_in_vitro_Reactivity_top_62_percent_constrained.DBN	0.507241	0.745934	0.519063	0.763318	0.00873961		SARS_SF1_100_mono_-1.ct	SHAPE_in_vivo_Incar_top_62_percent_constrained.DBN	0.513659	0.757319	0.519054	0.764344	0.00837865		SARS_SF1_100_mono_-1.ct	Incar_DMS_invitro_Reactivities_top_62_percent_constrained.DBN	0.247629	0.369063	0.488242	0.837115	0.00909296		SARS_SF1_100_mono_-1.ct	Pyle_SHAPE_SARS2_Reactivity_top_62_percent_constrained.DBN	0.537911	0.734385	0.539627	0.734744	0.0072005		SARS_SF1_100_mono_-1.ct	Sun_Reactivities_top_62_percent_constrained.DBN	0.477197	0.824496	0.477197	0.824496	0.0100211
SARS_SF1_100_mono_-1.ct	Rouskin_DMS_SARS2_Reactivity_top_63_percent_constrained.DBN	0.248152	0.38419	0.486619	0.865677	0.0102321		SARS_SF1_100_mono_-1.ct	Incarnato_SHAPE_SARS2_in_vitro_Reactivity_top_63_percent_constrained.DBN	0.518317	0.753822	0.530396	0.771391	0.00874237		SARS_SF1_100_mono_-1.ct	SHAPE_in_vivo_Incar_top_63_percent_constrained.DBN	0.525416	0.764558	0.530934	0.771649	0.00916732		SARS_SF1_100_mono_-1.ct	Incar_DMS_invitro_Reactivities_top_63_percent_constrained.DBN	0.253308	0.37256	0.49944	0.845047	0.00946301		SARS_SF1_100_mono_-1.ct	Pyle_SHAPE_SARS2_Reactivity_top_63_percent_constrained.DBN	0.547623	0.744795	0.54937	0.745159	0.00726011		SARS_SF1_100_mono_-1.ct	Sun_Reactivities_top_63_percent_constrained.DBN	0.489294	0.83149	0.489294	0.83149	0.0100589
SARS_SF1_100_mono_-1.ct	Rouskin_DMS_SARS2_Reactivity_top_64_percent_constrained.DBN	0.254748	0.386467	0.499554	0.870808	0.0112638		SARS_SF1_100_mono_-1.ct	Incarnato_SHAPE_SARS2_in_vitro_Reactivity_top_64_percent_constrained.DBN	0.529392	0.761711	0.54173	0.779463	0.00883386		SARS_SF1_100_mono_-1.ct	SHAPE_in_vivo_Incar_top_64_percent_constrained.DBN	0.536094	0.773341	0.541724	0.780514	0.00842152		SARS_SF1_100_mono_-1.ct	Incar_DMS_invitro_Reactivities_top_64_percent_constrained.DBN	0.259215	0.375813	0.511086	0.852426	0.00992747		SARS_SF1_100_mono_-1.ct	Pyle_SHAPE_SARS2_Reactivity_top_64_percent_constrained.DBN	0.558357	0.75366	0.560139	0.754028	0.00811984		SARS_SF1_100_mono_-1.ct	Sun_Reactivities_top_64_percent_constrained.DBN	0.501562	0.83824	0.501562	0.83824	0.0102834
SARS_SF1_100_mono_-1.ct	Rouskin_DMS_SARS2_Reactivity_top_65_percent_constrained.DBN	0.261174	0.388988	0.512154	0.876489	0.0110441		SARS_SF1_100_mono_-1.ct	Incarnato_SHAPE_SARS2_in_vitro_Reactivity_top_65_percent_constrained.DBN	0.540694	0.769275	0.553295	0.787203	0.00910458		SARS_SF1_100_mono_-1.ct	SHAPE_in_vivo_Incar_top_65_percent_constrained.DBN	0.546885	0.782043	0.552629	0.789297	0.00860688		SARS_SF1_100_mono_-1.ct	Incar_DMS_invitro_Reactivities_top_65_percent_constrained.DBN	0.265519	0.378416	0.523516	0.858329	0.010669		SARS_SF1_100_mono_-1.ct	Pyle_SHAPE_SARS2_Reactivity_top_65_percent_constrained.DBN	0.568013	0.764151	0.569825	0.764524	0.00740522		SARS_SF1_100_mono_-1.ct	Sun_Reactivities_top_65_percent_constrained.DBN	0.514057	0.844665	0.514057	0.844665	0.0105541
SARS_SF1_100_mono_-1.ct	Rouskin_DMS_SARS2_Reactivity_top_66_percent_constrained.DBN	0.26777	0.391265	0.525089	0.88162	0.0114036		SARS_SF1_100_mono_-1.ct	Incarnato_SHAPE_SARS2_in_vitro_Reactivity_top_66_percent_constrained.DBN	0.551826	0.777082	0.564687	0.795193	0.00905834		SARS_SF1_100_mono_-1.ct	SHAPE_in_vivo_Incar_top_66_percent_constrained.DBN	0.55779	0.790501	0.563648	0.797833	0.00879155		SARS_SF1_100_mono_-1.ct	Incar_DMS_invitro_Reactivities_top_66_percent_constrained.DBN	0.271994	0.380856	0.536282	0.863863	0.011028		SARS_SF1_100_mono_-1.ct	Pyle_SHAPE_SARS2_Reactivity_top_66_percent_constrained.DBN	0.578066	0.773992	0.57991	0.774369	0.00780943		SARS_SF1_100_mono_-1.ct	Sun_Reactivities_top_66_percent_constrained.DBN	0.526268	0.851496	0.526268	0.851496	0.0103977
SARS_SF1_100_mono_-1.ct	Rouskin_DMS_SARS2_Reactivity_top_67_percent_constrained.DBN	0.274139	0.393949	0.537578	0.887667	0.0110859		SARS_SF1_100_mono_-1.ct	Incarnato_SHAPE_SARS2_in_vitro_Reactivity_top_67_percent_constrained.DBN	0.56239	0.785703	0.575497	0.804014	0.00869154		SARS_SF1_100_mono_-1.ct	SHAPE_in_vivo_Incar_top_67_percent_constrained.DBN	0.568865	0.798715	0.574839	0.806123	0.0090217		SARS_SF1_100_mono_-1.ct	Incar_DMS_invitro_Reactivities_top_67_percent_constrained.DBN	0.277901	0.384027	0.547928	0.871057	0.0101444		SARS_SF1_100_mono_-1.ct	Pyle_SHAPE_SARS2_Reactivity_top_67_percent_constrained.DBN	0.588743	0.782938	0.590622	0.78332	0.00839064		SARS_SF1_100_mono_-1.ct	Sun_Reactivities_top_67_percent_constrained.DBN	0.538649	0.858084	0.538649	0.858084	0.0106243
SARS_SF1_100_mono_-1.ct	Rouskin_DMS_SARS2_Reactivity_top_68_percent_constrained.DBN	0.280621	0.396389	0.55029	0.893165	0.0113538		SARS_SF1_100_mono_-1.ct	Incarnato_SHAPE_SARS2_in_vitro_Reactivity_top_68_percent_constrained.DBN	0.573352	0.793754	0.586714	0.812253	0.00911106		SARS_SF1_100_mono_-1.ct	SHAPE_in_vivo_Incar_top_68_percent_constrained.DBN	0.581133	0.805221	0.587236	0.81269	0.0100747		SARS_SF1_100_mono_-1.ct	Incar_DMS_invitro_Reactivities_top_68_percent_constrained.DBN	0.284148	0.386792	0.560246	0.877329	0.010807		SARS_SF1_100_mono_-1.ct	Pyle_SHAPE_SARS2_Reactivity_top_68_percent_constrained.DBN	0.599307	0.792128	0.601219	0.792514	0.00839882		SARS_SF1_100_mono_-1.ct	Sun_Reactivities_top_68_percent_constrained.DBN	0.551883	0.863452	0.551883	0.863452	0.0114264
SARS_SF1_100_mono_-1.ct	Rouskin_DMS_SARS2_Reactivity_top_69_percent_constrained.DBN	0.286762	0.399317	0.562333	0.899762	0.0108357		SARS_SF1_100_mono_-1.ct	Incarnato_SHAPE_SARS2_in_vitro_Reactivity_top_69_percent_constrained.DBN	0.585733	0.799772	0.599384	0.818412	0.0103693		SARS_SF1_100_mono_-1.ct	SHAPE_in_vivo_Incar_top_69_percent_constrained.DBN	0.592321	0.813273	0.598542	0.820816	0.00928034		SARS_SF1_100_mono_-1.ct	Incar_DMS_invitro_Reactivities_top_69_percent_constrained.DBN	0.290566	0.389232	0.5729	0.882863	0.0111717		SARS_SF1_100_mono_-1.ct	Pyle_SHAPE_SARS2_Reactivity_top_69_percent_constrained.DBN	0.609928	0.801155	0.611874	0.801546	0.0085402		SARS_SF1_100_mono_-1.ct	Sun_Reactivities_top_69_percent_constrained.DBN	0.56398	0.870446	0.56398	0.870446	0.0105302
SARS_SF1_100_mono_-1.ct	Rouskin_DMS_SARS2_Reactivity_top_70_percent_constrained.DBN	0.293415	0.401594	0.575379	0.904893	0.0118056		SARS_SF1_100_mono_-1.ct	Incarnato_SHAPE_SARS2_in_vitro_Reactivity_top_70_percent_constrained.DBN	0.597035	0.807336	0.61095	0.826151	0.00955505		SARS_SF1_100_mono_-1.ct	SHAPE_in_vivo_Incar_top_70_percent_constrained.DBN	0.603964	0.820673	0.610308	0.828285	0.00974509		SARS_SF1_100_mono_-1.ct	Incar_DMS_invitro_Reactivities_top_70_percent_constrained.DBN	0.296757	0.392079	0.585106	0.889319	0.0108551		SARS_SF1_100_mono_-1.ct	Pyle_SHAPE_SARS2_Reactivity_top_70_percent_constrained.DBN	0.620321	0.810589	0.622301	0.810985	0.00845594		SARS_SF1_100_mono_-1.ct	Sun_Reactivities_top_70_percent_constrained.DBN	0.576646	0.876627	0.576646	0.876627	0.0111028
SARS_SF1_100_mono_-1.ct	Rouskin_DMS_SARS2_Reactivity_top_71_percent_constrained.DBN	0.299955	0.403953	0.588202	0.910207	0.0116719		SARS_SF1_100_mono_-1.ct	Incarnato_SHAPE_SARS2_in_vitro_Reactivity_top_71_percent_constrained.DBN	0.609019	0.813923	0.623213	0.832892	0.0102139		SARS_SF1_100_mono_-1.ct	SHAPE_in_vivo_Incar_top_71_percent_constrained.DBN	0.61521	0.828643	0.621671	0.836329	0.00950374		SARS_SF1_100_mono_-1.ct	Incar_DMS_invitro_Reactivities_top_71_percent_constrained.DBN	0.303288	0.394356	0.597984	0.894484	0.0115191		SARS_SF1_100_mono_-1.ct	Pyle_SHAPE_SARS2_Reactivity_top_71_percent_constrained.DBN	0.630204	0.820673	0.632215	0.821074	0.0081401		SARS_SF1_100_mono_-1.ct	Sun_Reactivities_top_71_percent_constrained.DBN	0.589822	0.882075	0.589822	0.882075	0.0116227
SARS_SF1_100_mono_-1.ct	Rouskin_DMS_SARS2_Reactivity_top_72_percent_constrained.DBN	0.306778	0.405904	0.601583	0.914605	0.0122382		SARS_SF1_100_mono_-1.ct	Incarnato_SHAPE_SARS2_in_vitro_Reactivity_top_72_percent_constrained.DBN	0.621117	0.820348	0.635592	0.839467	0.0103921		SARS_SF1_100_mono_-1.ct	SHAPE_in_vivo_Incar_top_72_percent_constrained.DBN	0.626739	0.836207	0.633322	0.843963	0.00983267		SARS_SF1_100_mono_-1.ct	Incar_DMS_invitro_Reactivities_top_72_percent_constrained.DBN	0.30999	0.39647	0.611198	0.899281	0.011883		SARS_SF1_100_mono_-1.ct	Pyle_SHAPE_SARS2_Reactivity_top_72_percent_constrained.DBN	0.640938	0.829619	0.642983	0.830024	0.00893822		SARS_SF1_100_mono_-1.ct	Sun_Reactivities_top_72_percent_constrained.DBN	0.602544	0.888175	0.602544	0.888175	0.0112996
SARS_SF1_100_mono_-1.ct	Rouskin_DMS_SARS2_Reactivity_top_73_percent_constrained.DBN	0.313317	0.408263	0.614407	0.919919	0.0117965		SARS_SF1_100_mono_-1.ct	Incarnato_SHAPE_SARS2_in_vitro_Reactivity_top_73_percent_constrained.DBN	0.6331	0.826936	0.647855	0.846208	0.0103772		SARS_SF1_100_mono_-1.ct	SHAPE_in_vivo_Incar_top_73_percent_constrained.DBN	0.638155	0.843933	0.644858	0.851761	0.00982575		SARS_SF1_100_mono_-1.ct	Incar_DMS_invitro_Reactivities_top_73_percent_constrained.DBN	0.316124	0.399317	0.623292	0.905737	0.010954		SARS_SF1_100_mono_-1.ct	Pyle_SHAPE_SARS2_Reactivity_top_73_percent_constrained.DBN	0.6519	0.838159	0.65398	0.838568	0.00922133		SARS_SF1_100_mono_-1.ct	Sun_Reactivities_top_73_percent_constrained.DBN	0.615664	0.893705	0.615664	0.893705	0.0117252
SARS_SF1_100_mono_-1.ct	Rouskin_DMS_SARS2_Reactivity_top_74_percent_constrained.DBN	0.320141	0.410215	0.627788	0.924317	0.0123682		SARS_SF1_100_mono_-1.ct	Incarnato_SHAPE_SARS2_in_vitro_Reactivity_top_74_percent_constrained.DBN	0.645539	0.832872	0.660584	0.852283	0.010848		SARS_SF1_100_mono_-1.ct	SHAPE_in_vivo_Incar_top_74_percent_constrained.DBN	0.650366	0.85052	0.657197	0.858409	0.0105922		SARS_SF1_100_mono_-1.ct	Incar_DMS_invitro_Reactivities_top_74_percent_constrained.DBN	0.322826	0.401431	0.636506	0.910533	0.0120317		SARS_SF1_100_mono_-1.ct	Pyle_SHAPE_SARS2_Reactivity_top_74_percent_constrained.DBN	0.663202	0.84621	0.665318	0.846623	0.00959934		SARS_SF1_100_mono_-1.ct	Sun_Reactivities_top_74_percent_constrained.DBN	0.628841	0.899154	0.628841	0.899154	0.0118478
SARS_SF1_100_mono_-1.ct	Rouskin_DMS_SARS2_Reactivity_top_75_percent_constrained.DBN	0.327306	0.41176	0.641838	0.927799	0.0130355		SARS_SF1_100_mono_-1.ct	Incarnato_SHAPE_SARS2_in_vitro_Reactivity_top_75_percent_constrained.DBN	0.656955	0.840273	0.672265	0.859857	0.0100448		SARS_SF1_100_mono_-1.ct	SHAPE_in_vivo_Incar_top_75_percent_constrained.DBN	0.662805	0.856783	0.669766	0.86473	0.0108687		SARS_SF1_100_mono_-1.ct	Incar_DMS_invitro_Reactivities_top_75_percent_constrained.DBN	0.329812	0.403058	0.65028	0.914222	0.0125923		SARS_SF1_100_mono_-1.ct	Pyle_SHAPE_SARS2_Reactivity_top_75_percent_constrained.DBN	0.674618	0.85418	0.676771	0.854597	0.00978714		SARS_SF1_100_mono_-1.ct	Sun_Reactivities_top_75_percent_constrained.DBN	0.642415	0.904034	0.642415	0.904034	0.0122715
SARS_SF1_100_mono_-1.ct	Rouskin_DMS_SARS2_Reactivity_top_76_percent_constrained.DBN	0.333959	0.413956	0.654884	0.932747	0.012169		SARS_SF1_100_mono_-1.ct	Incarnato_SHAPE_SARS2_in_vitro_Reactivity_top_76_percent_constrained.DBN	0.667859	0.848406	0.683424	0.868179	0.00968792		SARS_SF1_100_mono_-1.ct	SHAPE_in_vivo_Incar_top_76_percent_constrained.DBN	0.675016	0.86337	0.682105	0.871378	0.0107522		SARS_SF1_100_mono_-1.ct	Incar_DMS_invitro_Reactivities_top_76_percent_constrained.DBN	0.33623	0.405579	0.662934	0.919941	0.0116409		SARS_SF1_100_mono_-1.ct	Pyle_SHAPE_SARS2_Reactivity_top_76_percent_constrained.DBN	0.685125	0.86337	0.687311	0.863792	0.00910498		SARS_SF1_100_mono_-1.ct	Sun_Reactivities_top_76_percent_constrained.DBN	0.656273	0.908507	0.656273	0.908507	0.0125902
SARS_SF1_100_mono_-1.ct	Rouskin_DMS_SARS2_Reactivity_top_77_percent_constrained.DBN	0.340839	0.415826	0.668376	0.936962	0.0126419		SARS_SF1_100_mono_-1.ct	Incarnato_SHAPE_SARS2_in_vitro_Reactivity_top_77_percent_constrained.DBN	0.679446	0.855563	0.695281	0.875502	0.0103802		SARS_SF1_100_mono_-1.ct	SHAPE_in_vivo_Incar_top_77_percent_constrained.DBN	0.687113	0.87012	0.69433	0.878191	0.0107355		SARS_SF1_100_mono_-1.ct	Incar_DMS_invitro_Reactivities_top_77_percent_constrained.DBN	0.342818	0.407775	0.675924	0.924922	0.0120147		SARS_SF1_100_mono_-1.ct	Pyle_SHAPE_SARS2_Reactivity_top_77_percent_constrained.DBN	0.696371	0.871584	0.698593	0.87201	0.0098375		SARS_SF1_100_mono_-1.ct	Sun_Reactivities_top_77_percent_constrained.DBN	0.670074	0.913061	0.670074	0.913061	0.0126015
SARS_SF1_100_mono_-1.ct	Rouskin_DMS_SARS2_Reactivity_top_78_percent_constrained.DBN	0.34789	0.417534	0.682203	0.94081	0.0130085		SARS_SF1_100_mono_-1.ct	Incarnato_SHAPE_SARS2_in_vitro_Reactivity_top_78_percent_constrained.DBN	0.691543	0.861988	0.70766	0.882077	0.0109196		SARS_SF1_100_mono_-1.ct	SHAPE_in_vivo_Incar_top_78_percent_constrained.DBN	0.699211	0.876871	0.706554	0.885004	0.0108187		SARS_SF1_100_mono_-1.ct	Incar_DMS_invitro_Reactivities_top_78_percent_constrained.DBN	0.349747	0.409564	0.689586	0.92898	0.0126916		SARS_SF1_100_mono_-1.ct	Pyle_SHAPE_SARS2_Reactivity_top_78_percent_constrained.DBN	0.707332	0.880124	0.709589	0.880553	0.00968303		SARS_SF1_100_mono_-1.ct	Sun_Reactivities_top_78_percent_constrained.DBN	0.683819	0.917697	0.683819	0.917697	0.0126133
SARS_SF1_100_mono_-1.ct	Rouskin_DMS_SARS2_Reactivity_top_79_percent_constrained.DBN	0.354885	0.419242	0.695919	0.944658	0.0129564		SARS_SF1_100_mono_-1.ct	Incarnato_SHAPE_SARS2_in_vitro_Reactivity_top_79_percent_constrained.DBN	0.703413	0.868738	0.719807	0.888984	0.0107984		SARS_SF1_100_mono_-1.ct	SHAPE_in_vivo_Incar_top_79_percent_constrained.DBN	0.711251	0.883783	0.718721	0.891981	0.0108528		SARS_SF1_100_mono_-1.ct	Incar_DMS_invitro_Reactivities_top_79_percent_constrained.DBN	0.356052	0.412167	0.702016	0.934883	0.0116206		SARS_SF1_100_mono_-1.ct	Pyle_SHAPE_SARS2_Reactivity_top_79_percent_constrained.DBN	0.718521	0.888338	0.720814	0.888771	0.00997595		SARS_SF1_100_mono_-1.ct	Sun_Reactivities_top_79_percent_constrained.DBN	0.697223	0.92282	0.697223	0.92282	0.0123693
SARS_SF1_100_mono_-1.ct	Rouskin_DMS_SARS2_Reactivity_top_80_percent_constrained.DBN	0.361879	0.42095	0.709634	0.948507	0.0130092		SARS_SF1_100_mono_-1.ct	Incarnato_SHAPE_SARS2_in_vitro_Reactivity_top_80_percent_constrained.DBN	0.715568	0.875081	0.732245	0.895476	0.0111375		SARS_SF1_100_mono_-1.ct	SHAPE_in_vivo_Incar_top_80_percent_constrained.DBN	0.723633	0.890127	0.731233	0.898383	0.0112401		SARS_SF1_100_mono_-1.ct	Incar_DMS_invitro_Reactivities_top_80_percent_constrained.DBN	0.362242	0.415013	0.714222	0.941339	0.01149		SARS_SF1_100_mono_-1.ct	Pyle_SHAPE_SARS2_Reactivity_top_80_percent_constrained.DBN	0.729426	0.89704	0.731753	0.897478	0.009818		SARS_SF1_100_mono_-1.ct	Sun_Reactivities_top_80_percent_constrained.DBN	0.710229	0.928513	0.710229	0.928513	0.0120764
SARS_SF1_100_mono_-1.ct	Rouskin_DMS_SARS2_Reactivity_top_81_percent_constrained.DBN	0.369157	0.422251	0.723907	0.951439	0.0135799		SARS_SF1_100_mono_-1.ct	Incarnato_SHAPE_SARS2_in_vitro_Reactivity_top_81_percent_constrained.DBN	0.728006	0.881018	0.744973	0.901551	0.011475		SARS_SF1_100_mono_-1.ct	SHAPE_in_vivo_Incar_top_81_percent_constrained.DBN	0.736468	0.89582	0.744203	0.904129	0.0117271		SARS_SF1_100_mono_-1.ct	Incar_DMS_invitro_Reactivities_top_81_percent_constrained.DBN	0.36849	0.417697	0.72654	0.947427	0.0116704		SARS_SF1_100_mono_-1.ct	Pyle_SHAPE_SARS2_Reactivity_top_81_percent_constrained.DBN	0.74158	0.903871	0.743946	0.904312	0.0110263		SARS_SF1_100_mono_-1.ct	Sun_Reactivities_top_81_percent_constrained.DBN	0.724201	0.932824	0.724201	0.932824	0.0130331
SARS_SF1_100_mono_-1.ct	Rouskin_DMS_SARS2_Reactivity_top_82_percent_constrained.DBN	0.376322	0.423715	0.737957	0.954737	0.013414		SARS_SF1_100_mono_-1.ct	Incarnato_SHAPE_SARS2_in_vitro_Reactivity_top_82_percent_constrained.DBN	0.740331	0.887118	0.757585	0.907793	0.011449		SARS_SF1_100_mono_-1.ct	SHAPE_in_vivo_Incar_top_82_percent_constrained.DBN	0.74868	0.902407	0.756543	0.910777	0.0112384		SARS_SF1_100_mono_-1.ct	Incar_DMS_invitro_Reactivities_top_82_percent_constrained.DBN	0.3761	0.41851	0.741545	0.949271	0.0142444		SARS_SF1_100_mono_-1.ct	Pyle_SHAPE_SARS2_Reactivity_top_82_percent_constrained.DBN	0.753734	0.910784	0.756139	0.911229	0.0111106		SARS_SF1_100_mono_-1.ct	Sun_Reactivities_top_82_percent_constrained.DBN	0.737945	0.937459	0.737945	0.937459	0.0128849
SARS_SF1_100_mono_-1.ct	Rouskin_DMS_SARS2_Reactivity_top_83_percent_constrained.DBN	0.383373	0.425423	0.751784	0.958585	0.0132543		SARS_SF1_100_mono_-1.ct	Incarnato_SHAPE_SARS2_in_vitro_Reactivity_top_83_percent_constrained.DBN	0.753053	0.892648	0.770603	0.913452	0.011892		SARS_SF1_100_mono_-1.ct	SHAPE_in_vivo_Incar_top_83_percent_constrained.DBN	0.761799	0.907694	0.7698	0.916113	0.0121454		SARS_SF1_100_mono_-1.ct	Incar_DMS_invitro_Reactivities_top_83_percent_constrained.DBN	0.383257	0.419893	0.755655	0.952407	0.0134382		SARS_SF1_100_mono_-1.ct	Pyle_SHAPE_SARS2_Reactivity_top_83_percent_constrained.DBN	0.766059	0.917372	0.768503	0.917819	0.0113479		SARS_SF1_100_mono_-1.ct	Sun_Reactivities_top_83_percent_constrained.DBN	0.751349	0.942583	0.751349	0.942583	0.0126342
SARS_SF1_100_mono_-1.ct	Rouskin_DMS_SARS2_Reactivity_top_84_percent_constrained.DBN	0.390709	0.426643	0.766169	0.961334	0.0138283		SARS_SF1_100_mono_-1.ct	Incarnato_SHAPE_SARS2_in_vitro_Reactivity_top_84_percent_constrained.DBN	0.765775	0.898178	0.783622	0.919111	0.0119656		SARS_SF1_100_mono_-1.ct	SHAPE_in_vivo_Incar_top_84_percent_constrained.DBN	0.774465	0.91363	0.782599	0.922105	0.0118015		SARS_SF1_100_mono_-1.ct	Incar_DMS_invitro_Reactivities_top_84_percent_constrained.DBN	0.390186	0.421682	0.769317	0.956466	0.0130671		SARS_SF1_100_mono_-1.ct	Pyle_SHAPE_SARS2_Reactivity_top_84_percent_constrained.DBN	0.77827	0.924122	0.780753	0.924573	0.011326		SARS_SF1_100_mono_-1.ct	Sun_Reactivities_top_84_percent_constrained.DBN	0.765037	0.947381	0.765037	0.947381	0.0129675
SARS_SF1_100_mono_-1.ct	Rouskin_DMS_SARS2_Reactivity_top_85_percent_constrained.DBN	0.398328	0.427456	0.781111	0.963167	0.0143917		SARS_SF1_100_mono_-1.ct	Incarnato_SHAPE_SARS2_in_vitro_Reactivity_top_85_percent_constrained.DBN	0.777702	0.904847	0.795827	0.925935	0.0113011		SARS_SF1_100_mono_-1.ct	SHAPE_in_vivo_Incar_top_85_percent_constrained.DBN	0.787641	0.918835	0.795914	0.927358	0.0123477		SARS_SF1_100_mono_-1.ct	Incar_DMS_invitro_Reactivities_top_85_percent_constrained.DBN	0.397285	0.423146	0.783315	0.959786	0.0134349		SARS_SF1_100_mono_-1.ct	Pyle_SHAPE_SARS2_Reactivity_top_85_percent_constrained.DBN	0.790935	0.930303	0.793459	0.930757	0.011826		SARS_SF1_100_mono_-1.ct	Sun_Reactivities_top_85_percent_constrained.DBN	0.779008	0.951692	0.779008	0.951692	0.0132968
SARS_SF1_100_mono_-1.ct	Rouskin_DMS_SARS2_Reactivity_top_86_percent_constrained.DBN	0.405777	0.428595	0.795718	0.965732	0.0141069		SARS_SF1_100_mono_-1.ct	Incarnato_SHAPE_SARS2_in_vitro_Reactivity_top_86_percent_constrained.DBN	0.790083	0.910865	0.808497	0.932094	0.0118096		SARS_SF1_100_mono_-1.ct	SHAPE_in_vivo_Incar_top_86_percent_constrained.DBN	0.800647	0.924284	0.809056	0.932857	0.0122603		SARS_SF1_100_mono_-1.ct	Incar_DMS_invitro_Reactivities_top_86_percent_constrained.DBN	0.404555	0.424447	0.797648	0.962738	0.0137996		SARS_SF1_100_mono_-1.ct	Pyle_SHAPE_SARS2_Reactivity_top_86_percent_constrained.DBN	0.803828	0.936077	0.806393	0.936534	0.0121129		SARS_SF1_100_mono_-1.ct	Sun_Reactivities_top_86_percent_constrained.DBN	0.792639	0.95649	0.792639	0.95649	0.0130379
SARS_SF1_100_mono_-1.ct	Rouskin_DMS_SARS2_Reactivity_top_87_percent_constrained.DBN	0.412942	0.430059	0.809768	0.969031	0.0136148		SARS_SF1_100_mono_-1.ct	Incarnato_SHAPE_SARS2_in_vitro_Reactivity_top_87_percent_constrained.DBN	0.802976	0.916152	0.82169	0.937503	0.0123685		SARS_SF1_100_mono_-1.ct	SHAPE_in_vivo_Incar_top_87_percent_constrained.DBN	0.813086	0.930547	0.821625	0.939178	0.0118044		SARS_SF1_100_mono_-1.ct	Incar_DMS_invitro_Reactivities_top_87_percent_constrained.DBN	0.411541	0.426074	0.811422	0.966427	0.0133114		SARS_SF1_100_mono_-1.ct	Pyle_SHAPE_SARS2_Reactivity_top_87_percent_constrained.DBN	0.817289	0.941119	0.819896	0.941579	0.0127146		SARS_SF1_100_mono_-1.ct	Sun_Reactivities_top_87_percent_constrained.DBN	0.806781	0.960556	0.806781	0.960556	0.0135843
SARS_SF1_100_mono_-1.ct	Rouskin_DMS_SARS2_Reactivity_top_88_percent_constrained.DBN	0.420277	0.431278	0.824153	0.971779	0.0139785		SARS_SF1_100_mono_-1.ct	Incarnato_SHAPE_SARS2_in_vitro_Reactivity_top_88_percent_constrained.DBN	0.816153	0.921031	0.835174	0.942497	0.0127083		SARS_SF1_100_mono_-1.ct	SHAPE_in_vivo_Incar_top_88_percent_constrained.DBN	0.826035	0.936077	0.834711	0.944759	0.0123626		SARS_SF1_100_mono_-1.ct	Incar_DMS_invitro_Reactivities_top_88_percent_constrained.DBN	0.418697	0.427537	0.825532	0.969747	0.0136829		SARS_SF1_100_mono_-1.ct	Pyle_SHAPE_SARS2_Reactivity_top_88_percent_constrained.DBN	0.829897	0.9473	0.832545	0.947762	0.0119881		SARS_SF1_100_mono_-1.ct	Sun_Reactivities_top_88_percent_constrained.DBN	0.821662	0.963565	0.821662	0.963565	0.0143383
SARS_SF1_100_mono_-1.ct	Rouskin_DMS_SARS2_Reactivity_top_89_percent_constrained.DBN	0.427499	0.432661	0.838314	0.974895	0.0138059		SARS_SF1_100_mono_-1.ct	Incarnato_SHAPE_SARS2_in_vitro_Reactivity_top_89_percent_constrained.DBN	0.828534	0.927049	0.847844	0.948655	0.0120195		SARS_SF1_100_mono_-1.ct	SHAPE_in_vivo_Incar_top_89_percent_constrained.DBN	0.838757	0.941932	0.847567	0.950669	0.0122216		SARS_SF1_100_mono_-1.ct	Incar_DMS_invitro_Reactivities_top_89_percent_constrained.DBN	0.425967	0.428757	0.839866	0.972514	0.0139397		SARS_SF1_100_mono_-1.ct	Pyle_SHAPE_SARS2_Reactivity_top_89_percent_constrained.DBN	0.843017	0.952749	0.845707	0.953214	0.0125459		SARS_SF1_100_mono_-1.ct	Sun_Reactivities_top_89_percent_constrained.DBN	0.836599	0.966493	0.836599	0.966493	0.0144367
SARS_SF1_100_mono_-1.ct	Rouskin_DMS_SARS2_Reactivity_top_90_percent_constrained.DBN	0.435119	0.433474	0.853256	0.976727	0.0145943		SARS_SF1_100_mono_-1.ct	Incarnato_SHAPE_SARS2_in_vitro_Reactivity_top_90_percent_constrained.DBN	0.841881	0.931685	0.861502	0.953399	0.0130215		SARS_SF1_100_mono_-1.ct	SHAPE_in_vivo_Incar_top_90_percent_constrained.DBN	0.852615	0.946161	0.86157	0.954937	0.0133726		SARS_SF1_100_mono_-1.ct	Incar_DMS_invitro_Reactivities_top_90_percent_constrained.DBN	0.433123	0.430221	0.853975	0.975835	0.0137688		SARS_SF1_100_mono_-1.ct	Pyle_SHAPE_SARS2_Reactivity_top_90_percent_constrained.DBN	0.85625	0.958116	0.858982	0.958584	0.0127258		SARS_SF1_100_mono_-1.ct	Sun_Reactivities_top_90_percent_constrained.DBN	0.851252	0.969828	0.851252	0.969828	0.0142111
SARS_SF1_100_mono_-1.ct	Rouskin_DMS_SARS2_Reactivity_top_91_percent_constrained.DBN	0.44234	0.434938	0.867417	0.980026	0.0138786		SARS_SF1_100_mono_-1.ct	Incarnato_SHAPE_SARS2_in_vitro_Reactivity_top_91_percent_constrained.DBN	0.855171	0.936402	0.875102	0.958226	0.0130318		SARS_SF1_100_mono_-1.ct	SHAPE_in_vivo_Incar_top_91_percent_constrained.DBN	0.865735	0.951448	0.874828	0.960273	0.0127309		SARS_SF1_100_mono_-1.ct	Incar_DMS_invitro_Reactivities_top_91_percent_constrained.DBN	0.440507	0.431278	0.868533	0.978233	0.0142408		SARS_SF1_100_mono_-1.ct	Pyle_SHAPE_SARS2_Reactivity_top_91_percent_constrained.DBN	0.869427	0.963484	0.872201	0.963954	0.0127421		SARS_SF1_100_mono_-1.ct	Sun_Reactivities_top_91_percent_constrained.DBN	0.865906	0.973162	0.865906	0.973162	0.01426
SARS_SF1_100_mono_-1.ct	Rouskin_DMS_SARS2_Reactivity_top_92_percent_constrained.DBN	0.449505	0.436402	0.881467	0.983324	0.0138157		SARS_SF1_100_mono_-1.ct	Incarnato_SHAPE_SARS2_in_vitro_Reactivity_top_92_percent_constrained.DBN	0.86778	0.942095	0.888004	0.964051	0.0124386		SARS_SF1_100_mono_-1.ct	SHAPE_in_vivo_Incar_top_92_percent_constrained.DBN	0.878855	0.956734	0.888085	0.965608	0.0128016		SARS_SF1_100_mono_-1.ct	Incar_DMS_invitro_Reactivities_top_92_percent_constrained.DBN	0.447833	0.432498	0.882979	0.981	0.0141712		SARS_SF1_100_mono_-1.ct	Pyle_SHAPE_SARS2_Reactivity_top_92_percent_constrained.DBN	0.883285	0.967957	0.886103	0.96843	0.0134634		SARS_SF1_100_mono_-1.ct	Sun_Reactivities_top_92_percent_constrained.DBN	0.880502	0.976578	0.880502	0.976578	0.0142546
SARS_SF1_100_mono_-1.ct	Rouskin_DMS_SARS2_Reactivity_top_93_percent_constrained.DBN	0.456841	0.437622	0.895852	0.986073	0.0141841		SARS_SF1_100_mono_-1.ct	Incarnato_SHAPE_SARS2_in_vitro_Reactivity_top_93_percent_constrained.DBN	0.8809	0.947056	0.90143	0.969128	0.0130111		SARS_SF1_100_mono_-1.ct	SHAPE_in_vivo_Incar_top_93_percent_constrained.DBN	0.891691	0.962508	0.901056	0.971436	0.0126001		SARS_SF1_100_mono_-1.ct	Incar_DMS_invitro_Reactivities_top_93_percent_constrained.DBN	0.455501	0.433149	0.898096	0.982476	0.0148527		SARS_SF1_100_mono_-1.ct	Pyle_SHAPE_SARS2_Reactivity_top_93_percent_constrained.DBN	0.897825	0.971373	0.900689	0.971847	0.0141754		SARS_SF1_100_mono_-1.ct	Sun_Reactivities_top_93_percent_constrained.DBN	0.895155	0.979912	0.895155	0.979912	0.0143589
SARS_SF1_100_mono_-1.ct	Rouskin_DMS_SARS2_Reactivity_top_94_percent_constrained.DBN	0.464404	0.438598	0.910682	0.988272	0.0146566		SARS_SF1_100_mono_-1.ct	Incarnato_SHAPE_SARS2_in_vitro_Reactivity_top_94_percent_constrained.DBN	0.894247	0.951692	0.915088	0.973872	0.0133012		SARS_SF1_100_mono_-1.ct	SHAPE_in_vivo_Incar_top_94_percent_constrained.DBN	0.904924	0.967632	0.914428	0.976607	0.0130595		SARS_SF1_100_mono_-1.ct	Incar_DMS_invitro_Reactivities_top_94_percent_constrained.DBN	0.462884	0.434288	0.912654	0.985058	0.0143402		SARS_SF1_100_mono_-1.ct	Pyle_SHAPE_SARS2_Reactivity_top_94_percent_constrained.DBN	0.91174	0.975764	0.914649	0.976241	0.0136277		SARS_SF1_100_mono_-1.ct	Sun_Reactivities_top_94_percent_constrained.DBN	0.909922	0.983084	0.909922	0.983084	0.0145171
SARS_SF1_100_mono_-1.ct	Rouskin_DMS_SARS2_Reactivity_top_95_percent_constrained.DBN	0.472023	0.439411	0.925624	0.990104	0.0147942		SARS_SF1_100_mono_-1.ct	Incarnato_SHAPE_SARS2_in_vitro_Reactivity_top_95_percent_constrained.DBN	0.907821	0.956002	0.928978	0.978282	0.0135888		SARS_SF1_100_mono_-1.ct	SHAPE_in_vivo_Incar_top_95_percent_constrained.DBN	0.918612	0.972105	0.92826	0.981121	0.0135704		SARS_SF1_100_mono_-1.ct	Incar_DMS_invitro_Reactivities_top_95_percent_constrained.DBN	0.470097	0.435589	0.926876	0.98801	0.0140512		SARS_SF1_100_mono_-1.ct	Pyle_SHAPE_SARS2_Reactivity_top_95_percent_constrained.DBN	0.925371	0.980481	0.928323	0.98096	0.0134141		SARS_SF1_100_mono_-1.ct	Sun_Reactivities_top_95_percent_constrained.DBN	0.925087	0.985686	0.925087	0.985686	0.0149474
SARS_SF1_100_mono_-1.ct	Rouskin_DMS_SARS2_Reactivity_top_96_percent_constrained.DBN	0.479586	0.440306	0.940455	0.99212	0.0147136		SARS_SF1_100_mono_-1.ct	Incarnato_SHAPE_SARS2_in_vitro_Reactivity_top_96_percent_constrained.DBN	0.921565	0.960068	0.943043	0.982443	0.0138179		SARS_SF1_100_mono_-1.ct	SHAPE_in_vivo_Incar_top_96_percent_constrained.DBN	0.932413	0.976415	0.942206	0.985472	0.0137437		SARS_SF1_100_mono_-1.ct	Incar_DMS_invitro_Reactivities_top_96_percent_constrained.DBN	0.477708	0.436402	0.941881	0.989854	0.0148534		SARS_SF1_100_mono_-1.ct	Pyle_SHAPE_SARS2_Reactivity_top_96_percent_constrained.DBN	0.939058	0.985117	0.942055	0.985598	0.0135337		SARS_SF1_100_mono_-1.ct	Sun_Reactivities_top_96_percent_constrained.DBN	0.939967	0.988696	0.939967	0.988696	0.0147122
SARS_SF1_100_mono_-1.ct	Rouskin_DMS_SARS2_Reactivity_top_97_percent_constrained.DBN	0.487206	0.441119	0.955397	0.993953	0.0148517		SARS_SF1_100_mono_-1.ct	Incarnato_SHAPE_SARS2_in_vitro_Reactivity_top_97_percent_constrained.DBN	0.935935	0.96324	0.957747	0.985689	0.0144937		SARS_SF1_100_mono_-1.ct	SHAPE_in_vivo_Incar_top_97_percent_constrained.DBN	0.945874	0.981213	0.955808	0.990314	0.0134702		SARS_SF1_100_mono_-1.ct	Incar_DMS_invitro_Reactivities_top_97_percent_constrained.DBN	0.484978	0.437622	0.956215	0.992621	0.0142279		SARS_SF1_100_mono_-1.ct	Pyle_SHAPE_SARS2_Reactivity_top_97_percent_constrained.DBN	0.9532	0.989183	0.956242	0.989666	0.0140406		SARS_SF1_100_mono_-1.ct	Sun_Reactivities_top_97_percent_constrained.DBN	0.954904	0.991623	0.954904	0.991623	0.0148121
SARS_SF1_100_mono_-1.ct	Rouskin_DMS_SARS2_Reactivity_top_98_percent_constrained.DBN	0.494484	0.44242	0.96967	0.996885	0.0142285		SARS_SF1_100_mono_-1.ct	Incarnato_SHAPE_SARS2_in_vitro_Reactivity_top_98_percent_constrained.DBN	0.949395	0.967713	0.971522	0.990266	0.0136402		SARS_SF1_100_mono_-1.ct	SHAPE_in_vivo_Incar_top_98_percent_constrained.DBN	0.960129	0.984873	0.970213	0.994008	0.0143191		SARS_SF1_100_mono_-1.ct	Incar_DMS_invitro_Reactivities_top_98_percent_constrained.DBN	0.492645	0.438354	0.971333	0.994281	0.0150311		SARS_SF1_100_mono_-1.ct	Pyle_SHAPE_SARS2_Reactivity_top_98_percent_constrained.DBN	0.967854	0.992437	0.970942	0.992921	0.014596		SARS_SF1_100_mono_-1.ct	Sun_Reactivities_top_98_percent_constrained.DBN	0.970069	0.994226	0.970069	0.994226	0.0150769
SARS_SF1_100_mono_-1.ct	Rouskin_DMS_SARS2_Reactivity_top_99_percent_constrained.DBN	0.502445	0.442827	0.985281	0.997801	0.0155767		SARS_SF1_100_mono_-1.ct	Incarnato_SHAPE_SARS2_in_vitro_Reactivity_top_99_percent_constrained.DBN	0.962799	0.972267	0.985238	0.994927	0.0136466		SARS_SF1_100_mono_-1.ct	SHAPE_in_vivo_Incar_top_99_percent_constrained.DBN	0.974896	0.987801	0.985135	0.996963	0.0148766		SARS_SF1_100_mono_-1.ct	Incar_DMS_invitro_Reactivities_top_99_percent_constrained.DBN	0.499972	0.439493	0.985778	0.996864	0.0144004		SARS_SF1_100_mono_-1.ct	Pyle_SHAPE_SARS2_Reactivity_top_99_percent_constrained.DBN	0.982053	0.996422	0.985186	0.996908	0.0142002		SARS_SF1_100_mono_-1.ct	Sun_Reactivities_top_99_percent_constrained.DBN	0.984949	0.997235	0.984949	0.997235	0.0148393
SARS_SF1_100_mono_-1.ct	Rouskin_DMS_SARS2_Reactivity_top_100_percent_constrained.DBN	0.509951	0.443803	1	1	0.014719		SARS_SF1_100_mono_-1.ct	Incarnato_SHAPE_SARS2_in_vitro_Reactivity_top_100_percent_constrained.DBN	0.977225	0.975358	1	0.998089	0.0147341		SARS_SF1_100_mono_-1.ct	SHAPE_in_vivo_Incar_top_100_percent_constrained.DBN	0.989606	0.99081	1	1	0.0148646		SARS_SF1_100_mono_-1.ct	Incar_DMS_invitro_Reactivities_top_100_percent_constrained.DBN	0.507185	0.440875	1	1	0.0142217		SARS_SF1_100_mono_-1.ct	Pyle_SHAPE_SARS2_Reactivity_top_100_percent_constrained.DBN	0.996819	0.999512	1	1	0.014814		SARS_SF1_100_mono_-1.ct	Sun_Reactivities_top_100_percent_constrained.DBN	1	1	1	1	0.0150508
					Sum	0.775837							Sum	0.687244							Sum	0.67752							Sum	0.738012							Sum	0.631306							Sum	0.745183

## Sheet: SF1 10000Rnd Mono Results
Rouskins
		fpr	tpr	fpr norm	tpf norm	AUC
SARS_SF1_10000_mono_-1.ct	Rouskin_DMS_SARS2_Reactivity_top_0_percent_constrained.DBN	0	0	0	0
SARS_SF1_10000_mono_-1.ct	Rouskin_DMS_SARS2_Reactivity_top_1_percent_constrained.DBN	0.00358036	0.00659287	0.00702263	0.0148515	0.000104296
SARS_SF1_10000_mono_-1.ct	Rouskin_DMS_SARS2_Reactivity_top_2_percent_constrained.DBN	0.00528529	0.0158717	0.0103667	0.0357536	0.000119564
SARS_SF1_10000_mono_-1.ct	Rouskin_DMS_SARS2_Reactivity_top_3_percent_constrained.DBN	0.00778586	0.0240925	0.0152714	0.0542721	0.000266188
SARS_SF1_10000_mono_-1.ct	Rouskin_DMS_SARS2_Reactivity_top_4_percent_constrained.DBN	0.00949079	0.0333713	0.0186155	0.0751742	0.000251391
SARS_SF1_10000_mono_-1.ct	Rouskin_DMS_SARS2_Reactivity_top_5_percent_constrained.DBN	0.0113094	0.0424874	0.0221826	0.0957096	0.000341401
SARS_SF1_10000_mono_-1.ct	Rouskin_DMS_SARS2_Reactivity_top_6_percent_constrained.DBN	0.013469	0.0511965	0.0264185	0.115328	0.000488515
SARS_SF1_10000_mono_-1.ct	Rouskin_DMS_SARS2_Reactivity_top_7_percent_constrained.DBN	0.0150602	0.0606381	0.0295396	0.136597	0.000426342
SARS_SF1_10000_mono_-1.ct	Rouskin_DMS_SARS2_Reactivity_top_8_percent_constrained.DBN	0.0172198	0.0692658	0.0337755	0.156032	0.000660933
SARS_SF1_10000_mono_-1.ct	Rouskin_DMS_SARS2_Reactivity_top_9_percent_constrained.DBN	0.0199477	0.0770796	0.0391261	0.173634	0.000929042
SARS_SF1_10000_mono_-1.ct	Rouskin_DMS_SARS2_Reactivity_top_10_percent_constrained.DBN	0.0226756	0.0848934	0.0444766	0.191236	0.00102322
SARS_SF1_10000_mono_-1.ct	Rouskin_DMS_SARS2_Reactivity_top_11_percent_constrained.DBN	0.0253467	0.0928699	0.0497158	0.209204	0.00109604
SARS_SF1_10000_mono_-1.ct	Rouskin_DMS_SARS2_Reactivity_top_12_percent_constrained.DBN	0.0279041	0.100928	0.0547319	0.227356	0.00114046
SARS_SF1_10000_mono_-1.ct	Rouskin_DMS_SARS2_Reactivity_top_13_percent_constrained.DBN	0.0307456	0.108579	0.0603054	0.244591	0.00136323
SARS_SF1_10000_mono_-1.ct	Rouskin_DMS_SARS2_Reactivity_top_14_percent_constrained.DBN	0.0337577	0.116067	0.0662134	0.261459	0.00154468
SARS_SF1_10000_mono_-1.ct	Rouskin_DMS_SARS2_Reactivity_top_15_percent_constrained.DBN	0.0364287	0.123962	0.0714525	0.279245	0.00146299
SARS_SF1_10000_mono_-1.ct	Rouskin_DMS_SARS2_Reactivity_top_16_percent_constrained.DBN	0.0389861	0.13202	0.0764686	0.297396	0.00149179
SARS_SF1_10000_mono_-1.ct	Rouskin_DMS_SARS2_Reactivity_top_17_percent_constrained.DBN	0.0416004	0.139997	0.0815963	0.315365	0.00161708
SARS_SF1_10000_mono_-1.ct	Rouskin_DMS_SARS2_Reactivity_top_18_percent_constrained.DBN	0.0452376	0.146508	0.0887304	0.330033	0.00235449
SARS_SF1_10000_mono_-1.ct	Rouskin_DMS_SARS2_Reactivity_top_19_percent_constrained.DBN	0.0483633	0.153834	0.0948612	0.346535	0.00212456
SARS_SF1_10000_mono_-1.ct	Rouskin_DMS_SARS2_Reactivity_top_20_percent_constrained.DBN	0.0512617	0.161403	0.100546	0.363586	0.00206698
SARS_SF1_10000_mono_-1.ct	Rouskin_DMS_SARS2_Reactivity_top_21_percent_constrained.DBN	0.0539895	0.169217	0.105897	0.381188	0.00203958
SARS_SF1_10000_mono_-1.ct	Rouskin_DMS_SARS2_Reactivity_top_22_percent_constrained.DBN	0.0570016	0.176705	0.111805	0.398056	0.00235169
SARS_SF1_10000_mono_-1.ct	Rouskin_DMS_SARS2_Reactivity_top_23_percent_constrained.DBN	0.060241	0.183786	0.118159	0.414008	0.00263053
SARS_SF1_10000_mono_-1.ct	Rouskin_DMS_SARS2_Reactivity_top_24_percent_constrained.DBN	0.0635372	0.190786	0.124624	0.429776	0.00277862
SARS_SF1_10000_mono_-1.ct	Rouskin_DMS_SARS2_Reactivity_top_25_percent_constrained.DBN	0.0664356	0.198356	0.130309	0.446828	0.00254021
SARS_SF1_10000_mono_-1.ct	Rouskin_DMS_SARS2_Reactivity_top_26_percent_constrained.DBN	0.0691634	0.20617	0.135659	0.46443	0.00248497
SARS_SF1_10000_mono_-1.ct	Rouskin_DMS_SARS2_Reactivity_top_27_percent_constrained.DBN	0.0722323	0.213576	0.141679	0.481115	0.00289602
SARS_SF1_10000_mono_-1.ct	Rouskin_DMS_SARS2_Reactivity_top_28_percent_constrained.DBN	0.0758695	0.220088	0.148813	0.495783	0.00353696
SARS_SF1_10000_mono_-1.ct	Rouskin_DMS_SARS2_Reactivity_top_29_percent_constrained.DBN	0.0795067	0.226599	0.155947	0.510451	0.00364161
SARS_SF1_10000_mono_-1.ct	Rouskin_DMS_SARS2_Reactivity_top_30_percent_constrained.DBN	0.0829734	0.233436	0.162747	0.525853	0.00357563
SARS_SF1_10000_mono_-1.ct	Rouskin_DMS_SARS2_Reactivity_top_31_percent_constrained.DBN	0.0867243	0.239785	0.170104	0.540154	0.00397393
SARS_SF1_10000_mono_-1.ct	Rouskin_DMS_SARS2_Reactivity_top_32_percent_constrained.DBN	0.0902478	0.246459	0.177015	0.555189	0.003837
SARS_SF1_10000_mono_-1.ct	Rouskin_DMS_SARS2_Reactivity_top_33_percent_constrained.DBN	0.094226	0.252483	0.184818	0.568757	0.00443796
SARS_SF1_10000_mono_-1.ct	Rouskin_DMS_SARS2_Reactivity_top_34_percent_constrained.DBN	0.09792	0.258913	0.192063	0.583242	0.00422592
SARS_SF1_10000_mono_-1.ct	Rouskin_DMS_SARS2_Reactivity_top_35_percent_constrained.DBN	0.10241	0.264285	0.200869	0.595343	0.00524268
SARS_SF1_10000_mono_-1.ct	Rouskin_DMS_SARS2_Reactivity_top_36_percent_constrained.DBN	0.106842	0.269657	0.209564	0.607444	0.00528153
SARS_SF1_10000_mono_-1.ct	Rouskin_DMS_SARS2_Reactivity_top_37_percent_constrained.DBN	0.110991	0.275435	0.217701	0.620462	0.00504891
SARS_SF1_10000_mono_-1.ct	Rouskin_DMS_SARS2_Reactivity_top_38_percent_constrained.DBN	0.115367	0.28097	0.226285	0.63293	0.00543257
SARS_SF1_10000_mono_-1.ct	Rouskin_DMS_SARS2_Reactivity_top_39_percent_constrained.DBN	0.120255	0.285691	0.235871	0.643564	0.00616949
SARS_SF1_10000_mono_-1.ct	Rouskin_DMS_SARS2_Reactivity_top_40_percent_constrained.DBN	0.125199	0.29033	0.245569	0.654015	0.00634259
SARS_SF1_10000_mono_-1.ct	Rouskin_DMS_SARS2_Reactivity_top_41_percent_constrained.DBN	0.129916	0.295295	0.254821	0.6652	0.00615445
SARS_SF1_10000_mono_-1.ct	Rouskin_DMS_SARS2_Reactivity_top_42_percent_constrained.DBN	0.134917	0.299853	0.26463	0.675468	0.00662592
SARS_SF1_10000_mono_-1.ct	Rouskin_DMS_SARS2_Reactivity_top_43_percent_constrained.DBN	0.13952	0.305063	0.27366	0.687202	0.00620481
SARS_SF1_10000_mono_-1.ct	Rouskin_DMS_SARS2_Reactivity_top_44_percent_constrained.DBN	0.144408	0.309783	0.283246	0.697836	0.00668977
SARS_SF1_10000_mono_-1.ct	Rouskin_DMS_SARS2_Reactivity_top_45_percent_constrained.DBN	0.149125	0.314748	0.292498	0.709021	0.00655989
SARS_SF1_10000_mono_-1.ct	Rouskin_DMS_SARS2_Reactivity_top_46_percent_constrained.DBN	0.154524	0.318818	0.303088	0.718188	0.00760538
SARS_SF1_10000_mono_-1.ct	Rouskin_DMS_SARS2_Reactivity_top_47_percent_constrained.DBN	0.159298	0.323702	0.312451	0.72919	0.00682777
SARS_SF1_10000_mono_-1.ct	Rouskin_DMS_SARS2_Reactivity_top_48_percent_constrained.DBN	0.164412	0.328097	0.322484	0.739091	0.0074148
SARS_SF1_10000_mono_-1.ct	Rouskin_DMS_SARS2_Reactivity_top_49_percent_constrained.DBN	0.169357	0.332736	0.332181	0.749542	0.00726899
SARS_SF1_10000_mono_-1.ct	Rouskin_DMS_SARS2_Reactivity_top_50_percent_constrained.DBN	0.174756	0.336725	0.342771	0.758526	0.00803254
SARS_SF1_10000_mono_-1.ct	Rouskin_DMS_SARS2_Reactivity_top_51_percent_constrained.DBN	0.179984	0.341039	0.353026	0.768243	0.00787854
SARS_SF1_10000_mono_-1.ct	Rouskin_DMS_SARS2_Reactivity_top_52_percent_constrained.DBN	0.185042	0.345515	0.362947	0.778328	0.00772168
SARS_SF1_10000_mono_-1.ct	Rouskin_DMS_SARS2_Reactivity_top_53_percent_constrained.DBN	0.1901	0.349992	0.372868	0.788412	0.00782172
SARS_SF1_10000_mono_-1.ct	Rouskin_DMS_SARS2_Reactivity_top_54_percent_constrained.DBN	0.195499	0.354062	0.383458	0.79758	0.00844611
SARS_SF1_10000_mono_-1.ct	Rouskin_DMS_SARS2_Reactivity_top_55_percent_constrained.DBN	0.201068	0.357806	0.394382	0.806014	0.00880497
SARS_SF1_10000_mono_-1.ct	Rouskin_DMS_SARS2_Reactivity_top_56_percent_constrained.DBN	0.206411	0.361875	0.40486	0.815182	0.00854164
SARS_SF1_10000_mono_-1.ct	Rouskin_DMS_SARS2_Reactivity_top_57_percent_constrained.DBN	0.213003	0.364154	0.417791	0.820315	0.0106071
SARS_SF1_10000_mono_-1.ct	Rouskin_DMS_SARS2_Reactivity_top_58_percent_constrained.DBN	0.218857	0.367491	0.429272	0.827833	0.00950471
SARS_SF1_10000_mono_-1.ct	Rouskin_DMS_SARS2_Reactivity_top_59_percent_constrained.DBN	0.224881	0.370666	0.441088	0.834983	0.00986604
SARS_SF1_10000_mono_-1.ct	Rouskin_DMS_SARS2_Reactivity_top_60_percent_constrained.DBN	0.230564	0.374247	0.452235	0.843051	0.00939751
SARS_SF1_10000_mono_-1.ct	Rouskin_DMS_SARS2_Reactivity_top_61_percent_constrained.DBN	0.236815	0.377014	0.464497	0.849285	0.0104137
SARS_SF1_10000_mono_-1.ct	Rouskin_DMS_SARS2_Reactivity_top_62_percent_constrained.DBN	0.242441	0.380759	0.475532	0.857719	0.00946541
SARS_SF1_10000_mono_-1.ct	Rouskin_DMS_SARS2_Reactivity_top_63_percent_constrained.DBN	0.248466	0.383852	0.487348	0.864686	0.010217
SARS_SF1_10000_mono_-1.ct	Rouskin_DMS_SARS2_Reactivity_top_64_percent_constrained.DBN	0.255058	0.386131	0.500279	0.86982	0.0112473
SARS_SF1_10000_mono_-1.ct	Rouskin_DMS_SARS2_Reactivity_top_65_percent_constrained.DBN	0.26148	0.388654	0.512875	0.875504	0.011028
SARS_SF1_10000_mono_-1.ct	Rouskin_DMS_SARS2_Reactivity_top_66_percent_constrained.DBN	0.268129	0.390851	0.525917	0.880455	0.0114829
SARS_SF1_10000_mono_-1.ct	Rouskin_DMS_SARS2_Reactivity_top_67_percent_constrained.DBN	0.274494	0.393537	0.538402	0.886505	0.0110677
SARS_SF1_10000_mono_-1.ct	Rouskin_DMS_SARS2_Reactivity_top_68_percent_constrained.DBN	0.28103	0.395898	0.551221	0.891823	0.0114323
SARS_SF1_10000_mono_-1.ct	Rouskin_DMS_SARS2_Reactivity_top_69_percent_constrained.DBN	0.287111	0.398909	0.563148	0.898607	0.010718
SARS_SF1_10000_mono_-1.ct	Rouskin_DMS_SARS2_Reactivity_top_70_percent_constrained.DBN	0.293703	0.40127	0.576078	0.903924	0.0116882
SARS_SF1_10000_mono_-1.ct	Rouskin_DMS_SARS2_Reactivity_top_71_percent_constrained.DBN	0.300182	0.403712	0.588786	0.909424	0.0115566
SARS_SF1_10000_mono_-1.ct	Rouskin_DMS_SARS2_Reactivity_top_72_percent_constrained.DBN	0.306945	0.405746	0.602051	0.914008	0.0121243
SARS_SF1_10000_mono_-1.ct	Rouskin_DMS_SARS2_Reactivity_top_73_percent_constrained.DBN	0.313424	0.408188	0.614759	0.919509	0.0116848
SARS_SF1_10000_mono_-1.ct	Rouskin_DMS_SARS2_Reactivity_top_74_percent_constrained.DBN	0.320243	0.410142	0.628135	0.923909	0.0123586
SARS_SF1_10000_mono_-1.ct	Rouskin_DMS_SARS2_Reactivity_top_75_percent_constrained.DBN	0.32729	0.411851	0.641957	0.927759	0.0128238
SARS_SF1_10000_mono_-1.ct	Rouskin_DMS_SARS2_Reactivity_top_76_percent_constrained.DBN	0.33394	0.414049	0.654999	0.93271	0.0121644
SARS_SF1_10000_mono_-1.ct	Rouskin_DMS_SARS2_Reactivity_top_77_percent_constrained.DBN	0.340816	0.415921	0.668487	0.936927	0.0126372
SARS_SF1_10000_mono_-1.ct	Rouskin_DMS_SARS2_Reactivity_top_78_percent_constrained.DBN	0.34792	0.417548	0.682421	0.940594	0.013106
SARS_SF1_10000_mono_-1.ct	Rouskin_DMS_SARS2_Reactivity_top_79_percent_constrained.DBN	0.35491	0.419258	0.696132	0.944444	0.0129491
SARS_SF1_10000_mono_-1.ct	Rouskin_DMS_SARS2_Reactivity_top_80_percent_constrained.DBN	0.361844	0.421048	0.709731	0.948478	0.0128987
SARS_SF1_10000_mono_-1.ct	Rouskin_DMS_SARS2_Reactivity_top_81_percent_constrained.DBN	0.369118	0.422351	0.724	0.951412	0.0135749
SARS_SF1_10000_mono_-1.ct	Rouskin_DMS_SARS2_Reactivity_top_82_percent_constrained.DBN	0.376279	0.423816	0.738045	0.954712	0.0134092
SARS_SF1_10000_mono_-1.ct	Rouskin_DMS_SARS2_Reactivity_top_83_percent_constrained.DBN	0.383326	0.425525	0.751867	0.958563	0.0132496
SARS_SF1_10000_mono_-1.ct	Rouskin_DMS_SARS2_Reactivity_top_84_percent_constrained.DBN	0.390657	0.426746	0.766247	0.961313	0.0138234
SARS_SF1_10000_mono_-1.ct	Rouskin_DMS_SARS2_Reactivity_top_85_percent_constrained.DBN	0.398329	0.427478	0.781295	0.962963	0.0144911
SARS_SF1_10000_mono_-1.ct	Rouskin_DMS_SARS2_Reactivity_top_86_percent_constrained.DBN	0.405774	0.428618	0.795898	0.96553	0.0140993
SARS_SF1_10000_mono_-1.ct	Rouskin_DMS_SARS2_Reactivity_top_87_percent_constrained.DBN	0.412878	0.430164	0.809832	0.969014	0.013502
SARS_SF1_10000_mono_-1.ct	Rouskin_DMS_SARS2_Reactivity_top_88_percent_constrained.DBN	0.420209	0.431385	0.824211	0.971764	0.0139736
SARS_SF1_10000_mono_-1.ct	Rouskin_DMS_SARS2_Reactivity_top_89_percent_constrained.DBN	0.42737	0.43285	0.838257	0.975064	0.013695
SARS_SF1_10000_mono_-1.ct	Rouskin_DMS_SARS2_Reactivity_top_90_percent_constrained.DBN	0.434985	0.433664	0.853194	0.976898	0.0145919
SARS_SF1_10000_mono_-1.ct	Rouskin_DMS_SARS2_Reactivity_top_91_percent_constrained.DBN	0.442203	0.435129	0.86735	0.980198	0.0138764
SARS_SF1_10000_mono_-1.ct	Rouskin_DMS_SARS2_Reactivity_top_92_percent_constrained.DBN	0.449363	0.436594	0.881396	0.983498	0.0138135
SARS_SF1_10000_mono_-1.ct	Rouskin_DMS_SARS2_Reactivity_top_93_percent_constrained.DBN	0.456695	0.437815	0.895775	0.986249	0.0141819
SARS_SF1_10000_mono_-1.ct	Rouskin_DMS_SARS2_Reactivity_top_94_percent_constrained.DBN	0.464253	0.438792	0.910601	0.988449	0.0146543
SARS_SF1_10000_mono_-1.ct	Rouskin_DMS_SARS2_Reactivity_top_95_percent_constrained.DBN	0.471869	0.439606	0.925538	0.990282	0.0147919
SARS_SF1_10000_mono_-1.ct	Rouskin_DMS_SARS2_Reactivity_top_96_percent_constrained.DBN	0.479484	0.44042	0.940475	0.992116	0.0148193
SARS_SF1_10000_mono_-1.ct	Rouskin_DMS_SARS2_Reactivity_top_97_percent_constrained.DBN	0.487099	0.441234	0.955412	0.993949	0.0148466
SARS_SF1_10000_mono_-1.ct	Rouskin_DMS_SARS2_Reactivity_top_98_percent_constrained.DBN	0.494374	0.442536	0.96968	0.996883	0.0142237
SARS_SF1_10000_mono_-1.ct	Rouskin_DMS_SARS2_Reactivity_top_99_percent_constrained.DBN	0.50233	0.442943	0.985286	0.9978	0.0155715
SARS_SF1_10000_mono_-1.ct	Rouskin_DMS_SARS2_Reactivity_top_100_percent_constrained.DBN	0.509832	0.44392	1	1	0.0147141
					Sum	0.774283

## Sheet: SF1 100Rnd Di Results
Rouskins								Incarnato SHAPE in vitro								Incarnato SHAPE in vivo								Incarnato DMS in vitro								Pyle SHAPE								Sun SHAPE
				fpr norm	tpf norm	AUC				fpr	tpr	fpr norm	tpf norm	AUC				fpr	tpr	fpr norm	tpf norm	AUC				fpr	tpr	fpr norm	tpf norm	AUC				fpr	tpr	fpr norm	tpf norm	AUC				fpr	tpr	fpr norm	tpf norm	AUC
SARS_SF1_100_di_-1.ct	Rouskin_DMS_SARS2_Reactivity_top_0_percent_constrained.DBN	0	0	0	0			SARS_SF1_100_di_-1.ct	Incarnato_SHAPE_SARS2_in_vitro_Reactivity_top_0_percent_constrained.DBN	0	0	0	0			SARS_SF1_100_di_-1.ct	SHAPE_in_vivo_Incar_top_0_percent_constrained.DBN	0	0	0	0			SARS_SF1_100_di_-1.ct	Incar_DMS_invitro_Reactivities_top_0_percent_constrained.DBN	0	0	0	0			SARS_SF1_100_di_-1.ct	Pyle_SHAPE_SARS2_Reactivity_top_0_percent_constrained.DBN	0	0	0	0			SARS_SF1_100_di_-1.ct	Sun_Reactivities_top_0_percent_constrained.DBN	0	0	0	0
SARS_SF1_100_di_-1.ct	Rouskin_DMS_SARS2_Reactivity_top_1_percent_constrained.DBN	0.00371096	0.00687023	0.00736648	0.0154805	0.000114037		SARS_SF1_100_di_-1.ct	Incarnato_SHAPE_SARS2_in_vitro_Reactivity_top_1_percent_constrained.DBN	0.00648715	0.0158397	0.00663927	0.0162411	0.000107829		SARS_SF1_100_di_-1.ct	SHAPE_in_vivo_Incar_top_1_percent_constrained.DBN	0.00453071	0.0198473	0.00457952	0.0200173	9.16697e-05		SARS_SF1_100_di_-1.ct	Incar_DMS_invitro_Reactivities_top_1_percent_constrained.DBN	0.00514854	0.00419847	0.0102722	0.00953206	9.79154e-05		SARS_SF1_100_di_-1.ct	Pyle_SHAPE_SARS2_Reactivity_top_1_percent_constrained.DBN	0.00875251	0.0122137	0.00877872	0.0122184	0.000107262		SARS_SF1_100_di_-1.ct	Sun_Reactivities_top_1_percent_constrained.DBN	0.00643567	0.0166031	0.00643567	0.0166031	0.000106852
SARS_SF1_100_di_-1.ct	Rouskin_DMS_SARS2_Reactivity_top_2_percent_constrained.DBN	0.00587568	0.0166031	0.0116636	0.0374113	0.000160761		SARS_SF1_100_di_-1.ct	Incarnato_SHAPE_SARS2_in_vitro_Reactivity_top_2_percent_constrained.DBN	0.00978222	0.0375954	0.0100116	0.0385481	0.000129997		SARS_SF1_100_di_-1.ct	SHAPE_in_vivo_Incar_top_2_percent_constrained.DBN	0.0118931	0.0344466	0.0120212	0.0347416	0.000258537		SARS_SF1_100_di_-1.ct	Incar_DMS_invitro_Reactivities_top_2_percent_constrained.DBN	0.0098337	0.00916031	0.0196199	0.0207972	0.000194407		SARS_SF1_100_di_-1.ct	Pyle_SHAPE_SARS2_Reactivity_top_2_percent_constrained.DBN	0.017505	0.0245229	0.0175574	0.0245323	0.000215362		SARS_SF1_100_di_-1.ct	Sun_Reactivities_top_2_percent_constrained.DBN	0.00916439	0.0400763	0.00916439	0.0400763	0.000109357
SARS_SF1_100_di_-1.ct	Rouskin_DMS_SARS2_Reactivity_top_3_percent_constrained.DBN	0.00850428	0.0255725	0.0168815	0.057622	0.000300667		SARS_SF1_100_di_-1.ct	Incarnato_SHAPE_SARS2_in_vitro_Reactivity_top_3_percent_constrained.DBN	0.0148278	0.0561069	0.0151755	0.0575286	0.000297071		SARS_SF1_100_di_-1.ct	SHAPE_in_vivo_Incar_top_3_percent_constrained.DBN	0.0206456	0.0464695	0.020868	0.0468675	0.000414627		SARS_SF1_100_di_-1.ct	Incar_DMS_invitro_Reactivities_top_3_percent_constrained.DBN	0.0150852	0.0131679	0.0300976	0.029896	0.00031324		SARS_SF1_100_di_-1.ct	Pyle_SHAPE_SARS2_Reactivity_top_3_percent_constrained.DBN	0.0261031	0.0370229	0.0261813	0.037037	0.0003194		SARS_SF1_100_di_-1.ct	Sun_Reactivities_top_3_percent_constrained.DBN	0.0117387	0.0638359	0.0117387	0.0638359	0.000164331
SARS_SF1_100_di_-1.ct	Rouskin_DMS_SARS2_Reactivity_top_4_percent_constrained.DBN	0.0109267	0.0348282	0.0216902	0.0784777	0.000377374		SARS_SF1_100_di_-1.ct	Incarnato_SHAPE_SARS2_in_vitro_Reactivity_top_4_percent_constrained.DBN	0.0219842	0.0707061	0.0224997	0.0724978	0.000530993		SARS_SF1_100_di_-1.ct	SHAPE_in_vivo_Incar_top_4_percent_constrained.DBN	0.0296556	0.0580153	0.029975	0.0585122	0.00053287		SARS_SF1_100_di_-1.ct	Incar_DMS_invitro_Reactivities_top_4_percent_constrained.DBN	0.0190496	0.0194656	0.0380072	0.0441941	0.000349558		SARS_SF1_100_di_-1.ct	Pyle_SHAPE_SARS2_Reactivity_top_4_percent_constrained.DBN	0.0349071	0.0492366	0.0350116	0.0492554	0.000434943		SARS_SF1_100_di_-1.ct	Sun_Reactivities_top_4_percent_constrained.DBN	0.0147763	0.0867366	0.0147763	0.0867366	0.000263474
SARS_SF1_100_di_-1.ct	Rouskin_DMS_SARS2_Reactivity_top_5_percent_constrained.DBN	0.0132976	0.0441794	0.0263966	0.0995485	0.000468511		SARS_SF1_100_di_-1.ct	Incarnato_SHAPE_SARS2_in_vitro_Reactivity_top_5_percent_constrained.DBN	0.0298615	0.0839695	0.0305617	0.0860973	0.000694113		SARS_SF1_100_di_-1.ct	SHAPE_in_vivo_Incar_top_5_percent_constrained.DBN	0.0371209	0.0724237	0.0375208	0.073044	0.000551175		SARS_SF1_100_di_-1.ct	Incar_DMS_invitro_Reactivities_top_5_percent_constrained.DBN	0.0226021	0.0266221	0.045095	0.0604419	0.000428402		SARS_SF1_100_di_-1.ct	Pyle_SHAPE_SARS2_Reactivity_top_5_percent_constrained.DBN	0.0424754	0.063645	0.0426026	0.0636693	0.000483315		SARS_SF1_100_di_-1.ct	Sun_Reactivities_top_5_percent_constrained.DBN	0.0201308	0.105344	0.0201308	0.105344	0.000564059
SARS_SF1_100_di_-1.ct	Rouskin_DMS_SARS2_Reactivity_top_6_percent_constrained.DBN	0.0162354	0.0525763	0.0322284	0.118469	0.000690888		SARS_SF1_100_di_-1.ct	Incarnato_SHAPE_SARS2_in_vitro_Reactivity_top_6_percent_constrained.DBN	0.0376358	0.0974237	0.0385183	0.0998924	0.000794802		SARS_SF1_100_di_-1.ct	SHAPE_in_vivo_Incar_top_6_percent_constrained.DBN	0.0445348	0.0869275	0.0450146	0.087672	0.000656993		SARS_SF1_100_di_-1.ct	Incar_DMS_invitro_Reactivities_top_6_percent_constrained.DBN	0.0254338	0.0350191	0.0507447	0.0795061	0.000449187		SARS_SF1_100_di_-1.ct	Pyle_SHAPE_SARS2_Reactivity_top_6_percent_constrained.DBN	0.0507646	0.0767176	0.0509166	0.0767468	0.000638071		SARS_SF1_100_di_-1.ct	Sun_Reactivities_top_6_percent_constrained.DBN	0.0285229	0.118321	0.0285229	0.118321	0.00099296
SARS_SF1_100_di_-1.ct	Rouskin_DMS_SARS2_Reactivity_top_7_percent_constrained.DBN	0.0186063	0.0619275	0.0369347	0.13954	0.000656725		SARS_SF1_100_di_-1.ct	Incarnato_SHAPE_SARS2_in_vitro_Reactivity_top_7_percent_constrained.DBN	0.0459764	0.109828	0.0470545	0.112611	0.000961272		SARS_SF1_100_di_-1.ct	SHAPE_in_vivo_Incar_top_7_percent_constrained.DBN	0.0499408	0.105153	0.0504788	0.106053	0.000579496		SARS_SF1_100_di_-1.ct	Incar_DMS_invitro_Reactivities_top_7_percent_constrained.DBN	0.0286773	0.0427481	0.0572162	0.0970537	0.000628083		SARS_SF1_100_di_-1.ct	Pyle_SHAPE_SARS2_Reactivity_top_7_percent_constrained.DBN	0.0590537	0.0898855	0.0592306	0.0899198	0.000747591		SARS_SF1_100_di_-1.ct	Sun_Reactivities_top_7_percent_constrained.DBN	0.035319	0.134256	0.035319	0.134256	0.000912411
SARS_SF1_100_di_-1.ct	Rouskin_DMS_SARS2_Reactivity_top_8_percent_constrained.DBN	0.021338	0.0706107	0.0423573	0.159106	0.000862758		SARS_SF1_100_di_-1.ct	Incarnato_SHAPE_SARS2_in_vitro_Reactivity_top_8_percent_constrained.DBN	0.0521547	0.12624	0.0533776	0.129439	0.00081846		SARS_SF1_100_di_-1.ct	SHAPE_in_vivo_Incar_top_8_percent_constrained.DBN	0.0574062	0.119656	0.0580246	0.120681	0.000910637		SARS_SF1_100_di_-1.ct	Incar_DMS_invitro_Reactivities_top_8_percent_constrained.DBN	0.0311486	0.051813	0.0621469	0.117634	0.000580015		SARS_SF1_100_di_-1.ct	Pyle_SHAPE_SARS2_Reactivity_top_8_percent_constrained.DBN	0.0678062	0.102099	0.0680093	0.102138	0.000896643		SARS_SF1_100_di_-1.ct	Sun_Reactivities_top_8_percent_constrained.DBN	0.0439685	0.146756	0.0439685	0.146756	0.00126937
SARS_SF1_100_di_-1.ct	Rouskin_DMS_SARS2_Reactivity_top_9_percent_constrained.DBN	0.0242758	0.0789122	0.0481891	0.177811	0.00103696		SARS_SF1_100_di_-1.ct	Incarnato_SHAPE_SARS2_in_vitro_Reactivity_top_9_percent_constrained.DBN	0.0588478	0.141698	0.0602276	0.145289	0.000995236		SARS_SF1_100_di_-1.ct	SHAPE_in_vivo_Incar_top_9_percent_constrained.DBN	0.0644597	0.134828	0.065154	0.135983	0.000969488		SARS_SF1_100_di_-1.ct	Incar_DMS_invitro_Reactivities_top_9_percent_constrained.DBN	0.0335684	0.0610687	0.0669748	0.138648	0.000669385		SARS_SF1_100_di_-1.ct	Pyle_SHAPE_SARS2_Reactivity_top_9_percent_constrained.DBN	0.0766102	0.114313	0.0768397	0.114357	0.00100981		SARS_SF1_100_di_-1.ct	Sun_Reactivities_top_9_percent_constrained.DBN	0.0513824	0.161546	0.0513824	0.161546	0.00119768
SARS_SF1_100_di_-1.ct	Rouskin_DMS_SARS2_Reactivity_top_10_percent_constrained.DBN	0.0273168	0.0870229	0.0542255	0.196087	0.00118366		SARS_SF1_100_di_-1.ct	Incarnato_SHAPE_SARS2_in_vitro_Reactivity_top_10_percent_constrained.DBN	0.0628121	0.162214	0.064285	0.166324	0.000674832		SARS_SF1_100_di_-1.ct	SHAPE_in_vivo_Incar_top_10_percent_constrained.DBN	0.0716676	0.149714	0.0724396	0.150996	0.0011001		SARS_SF1_100_di_-1.ct	Incar_DMS_invitro_Reactivities_top_10_percent_constrained.DBN	0.0360397	0.0701336	0.0719055	0.159229	0.000785103		SARS_SF1_100_di_-1.ct	Pyle_SHAPE_SARS2_Reactivity_top_10_percent_constrained.DBN	0.0846419	0.127863	0.0848954	0.127911	0.00103043		SARS_SF1_100_di_-1.ct	Sun_Reactivities_top_10_percent_constrained.DBN	0.0583844	0.177099	0.0583844	0.177099	0.00124005
SARS_SF1_100_di_-1.ct	Rouskin_DMS_SARS2_Reactivity_top_11_percent_constrained.DBN	0.0304092	0.0951336	0.0603642	0.214363	0.00131591		SARS_SF1_100_di_-1.ct	Incarnato_SHAPE_SARS2_in_vitro_Reactivity_top_11_percent_constrained.DBN	0.0696597	0.177385	0.0712931	0.18188	0.00127464		SARS_SF1_100_di_-1.ct	SHAPE_in_vivo_Incar_top_11_percent_constrained.DBN	0.0793389	0.16374	0.0801936	0.165143	0.00128051		SARS_SF1_100_di_-1.ct	Incar_DMS_invitro_Reactivities_top_11_percent_constrained.DBN	0.0390259	0.0783397	0.0778634	0.17786	0.00105967		SARS_SF1_100_di_-1.ct	Pyle_SHAPE_SARS2_Reactivity_top_11_percent_constrained.DBN	0.0923647	0.14208	0.0926414	0.142134	0.00110096		SARS_SF1_100_di_-1.ct	Sun_Reactivities_top_11_percent_constrained.DBN	0.0692478	0.185496	0.0692478	0.185496	0.00201512
SARS_SF1_100_di_-1.ct	Rouskin_DMS_SARS2_Reactivity_top_12_percent_constrained.DBN	0.0332955	0.103531	0.0660937	0.233283	0.00133659		SARS_SF1_100_di_-1.ct	Incarnato_SHAPE_SARS2_in_vitro_Reactivity_top_12_percent_constrained.DBN	0.0762498	0.193034	0.0780377	0.197926	0.00133494		SARS_SF1_100_di_-1.ct	SHAPE_in_vivo_Incar_top_12_percent_constrained.DBN	0.0870102	0.177767	0.0879475	0.17929	0.0013902		SARS_SF1_100_di_-1.ct	Incar_DMS_invitro_Reactivities_top_12_percent_constrained.DBN	0.0424239	0.085687	0.084643	0.194541	0.00131892		SARS_SF1_100_di_-1.ct	Pyle_SHAPE_SARS2_Reactivity_top_12_percent_constrained.DBN	0.10122	0.154103	0.101523	0.154162	0.00136927		SARS_SF1_100_di_-1.ct	Sun_Reactivities_top_12_percent_constrained.DBN	0.0776914	0.198378	0.0776914	0.198378	0.00167502
SARS_SF1_100_di_-1.ct	Rouskin_DMS_SARS2_Reactivity_top_13_percent_constrained.DBN	0.036388	0.111546	0.0722325	0.251344	0.00154293		SARS_SF1_100_di_-1.ct	Incarnato_SHAPE_SARS2_in_vitro_Reactivity_top_13_percent_constrained.DBN	0.082737	0.208874	0.084677	0.214167	0.00142191		SARS_SF1_100_di_-1.ct	SHAPE_in_vivo_Incar_top_13_percent_constrained.DBN	0.0939608	0.19313	0.0949729	0.194784	0.00136843		SARS_SF1_100_di_-1.ct	Incar_DMS_invitro_Reactivities_top_13_percent_constrained.DBN	0.0457705	0.0932252	0.09132	0.211655	0.00141321		SARS_SF1_100_di_-1.ct	Pyle_SHAPE_SARS2_Reactivity_top_13_percent_constrained.DBN	0.109509	0.167176	0.109837	0.167239	0.00139042		SARS_SF1_100_di_-1.ct	Sun_Reactivities_top_13_percent_constrained.DBN	0.0863924	0.210782	0.0863924	0.210782	0.00183402
SARS_SF1_100_di_-1.ct	Rouskin_DMS_SARS2_Reactivity_top_14_percent_constrained.DBN	0.0397897	0.119084	0.0789851	0.268329	0.00181192		SARS_SF1_100_di_-1.ct	Incarnato_SHAPE_SARS2_in_vitro_Reactivity_top_14_percent_constrained.DBN	0.0889667	0.225191	0.0910528	0.230897	0.00147216		SARS_SF1_100_di_-1.ct	SHAPE_in_vivo_Incar_top_14_percent_constrained.DBN	0.10122	0.20792	0.102311	0.209701	0.00153871		SARS_SF1_100_di_-1.ct	Incar_DMS_invitro_Reactivities_top_14_percent_constrained.DBN	0.0482933	0.102195	0.0963534	0.232019	0.00116784		SARS_SF1_100_di_-1.ct	Pyle_SHAPE_SARS2_Reactivity_top_14_percent_constrained.DBN	0.117901	0.180153	0.118255	0.180221	0.00151697		SARS_SF1_100_di_-1.ct	Sun_Reactivities_top_14_percent_constrained.DBN	0.0919014	0.229103	0.0919014	0.229103	0.00126211
SARS_SF1_100_di_-1.ct	Rouskin_DMS_SARS2_Reactivity_top_15_percent_constrained.DBN	0.0430883	0.126718	0.085533	0.28553	0.00186965		SARS_SF1_100_di_-1.ct	Incarnato_SHAPE_SARS2_in_vitro_Reactivity_top_15_percent_constrained.DBN	0.0956083	0.240744	0.0978501	0.246845	0.00167789		SARS_SF1_100_di_-1.ct	SHAPE_in_vivo_Incar_top_15_percent_constrained.DBN	0.108428	0.222805	0.109596	0.224714	0.00163717		SARS_SF1_100_di_-1.ct	Incar_DMS_invitro_Reactivities_top_15_percent_constrained.DBN	0.0507646	0.111355	0.101284	0.252816	0.00124655		SARS_SF1_100_di_-1.ct	Pyle_SHAPE_SARS2_Reactivity_top_15_percent_constrained.DBN	0.1265	0.192653	0.126878	0.192726	0.00166203		SARS_SF1_100_di_-1.ct	Sun_Reactivities_top_15_percent_constrained.DBN	0.0984915	0.24542	0.0984915	0.24542	0.00161735
SARS_SF1_100_di_-1.ct	Rouskin_DMS_SARS2_Reactivity_top_16_percent_constrained.DBN	0.0462323	0.134637	0.0917741	0.303376	0.00189338		SARS_SF1_100_di_-1.ct	Incarnato_SHAPE_SARS2_in_vitro_Reactivity_top_16_percent_constrained.DBN	0.101735	0.257252	0.104121	0.263771	0.00165395		SARS_SF1_100_di_-1.ct	SHAPE_in_vivo_Incar_top_16_percent_constrained.DBN	0.116202	0.236641	0.117454	0.238668	0.00187546		SARS_SF1_100_di_-1.ct	Incar_DMS_invitro_Reactivities_top_16_percent_constrained.DBN	0.054523	0.118034	0.108783	0.267981	0.00200951		SARS_SF1_100_di_-1.ct	Pyle_SHAPE_SARS2_Reactivity_top_16_percent_constrained.DBN	0.135612	0.204294	0.136019	0.204372	0.001868		SARS_SF1_100_di_-1.ct	Sun_Reactivities_top_16_percent_constrained.DBN	0.108119	0.256107	0.108119	0.256107	0.00246574
SARS_SF1_100_di_-1.ct	Rouskin_DMS_SARS2_Reactivity_top_17_percent_constrained.DBN	0.0490156	0.143225	0.097299	0.322726	0.00178302		SARS_SF1_100_di_-1.ct	Incarnato_SHAPE_SARS2_in_vitro_Reactivity_top_17_percent_constrained.DBN	0.108377	0.272805	0.110918	0.279718	0.00190134		SARS_SF1_100_di_-1.ct	SHAPE_in_vivo_Incar_top_17_percent_constrained.DBN	0.123822	0.250763	0.125156	0.252911	0.0019479		SARS_SF1_100_di_-1.ct	Incar_DMS_invitro_Reactivities_top_17_percent_constrained.DBN	0.0574577	0.126336	0.114638	0.286828	0.00167943		SARS_SF1_100_di_-1.ct	Pyle_SHAPE_SARS2_Reactivity_top_17_percent_constrained.DBN	0.143902	0.217366	0.144333	0.217449	0.00180787		SARS_SF1_100_di_-1.ct	Sun_Reactivities_top_17_percent_constrained.DBN	0.111414	0.278626	0.111414	0.278626	0.00091809
SARS_SF1_100_di_-1.ct	Rouskin_DMS_SARS2_Reactivity_top_18_percent_constrained.DBN	0.0527265	0.150095	0.104665	0.338207	0.00249139		SARS_SF1_100_di_-1.ct	Incarnato_SHAPE_SARS2_in_vitro_Reactivity_top_18_percent_constrained.DBN	0.116202	0.286164	0.118927	0.293416	0.00235005		SARS_SF1_100_di_-1.ct	SHAPE_in_vivo_Incar_top_18_percent_constrained.DBN	0.131545	0.264695	0.132962	0.266962	0.0020839		SARS_SF1_100_di_-1.ct	Incar_DMS_invitro_Reactivities_top_18_percent_constrained.DBN	0.0613191	0.132824	0.122342	0.30156	0.00232326		SARS_SF1_100_di_-1.ct	Pyle_SHAPE_SARS2_Reactivity_top_18_percent_constrained.DBN	0.151573	0.231584	0.152027	0.231672	0.00178256		SARS_SF1_100_di_-1.ct	Sun_Reactivities_top_18_percent_constrained.DBN	0.115842	0.29895	0.115842	0.29895	0.00132367
SARS_SF1_100_di_-1.ct	Rouskin_DMS_SARS2_Reactivity_top_19_percent_constrained.DBN	0.0561282	0.157634	0.111418	0.355192	0.00239848		SARS_SF1_100_di_-1.ct	Incarnato_SHAPE_SARS2_in_vitro_Reactivity_top_19_percent_constrained.DBN	0.123565	0.300382	0.126462	0.307993	0.00232074		SARS_SF1_100_di_-1.ct	SHAPE_in_vivo_Incar_top_19_percent_constrained.DBN	0.139577	0.278053	0.14108	0.280435	0.00227664		SARS_SF1_100_di_-1.ct	Incar_DMS_invitro_Reactivities_top_19_percent_constrained.DBN	0.0648715	0.139981	0.12943	0.317808	0.00225257		SARS_SF1_100_di_-1.ct	Pyle_SHAPE_SARS2_Reactivity_top_19_percent_constrained.DBN	0.160583	0.243416	0.161064	0.243509	0.00220057		SARS_SF1_100_di_-1.ct	Sun_Reactivities_top_19_percent_constrained.DBN	0.122535	0.315076	0.122535	0.315076	0.00210884
SARS_SF1_100_di_-1.ct	Rouskin_DMS_SARS2_Reactivity_top_20_percent_constrained.DBN	0.0594269	0.165267	0.117966	0.372393	0.00243842		SARS_SF1_100_di_-1.ct	Incarnato_SHAPE_SARS2_in_vitro_Reactivity_top_20_percent_constrained.DBN	0.131185	0.314122	0.134261	0.322082	0.00251176		SARS_SF1_100_di_-1.ct	SHAPE_in_vivo_Incar_top_20_percent_constrained.DBN	0.147454	0.291698	0.149042	0.294197	0.00234243		SARS_SF1_100_di_-1.ct	Incar_DMS_invitro_Reactivities_top_20_percent_constrained.DBN	0.0686815	0.146565	0.137031	0.332756	0.00252942		SARS_SF1_100_di_-1.ct	Pyle_SHAPE_SARS2_Reactivity_top_20_percent_constrained.DBN	0.169696	0.254962	0.170204	0.255059	0.00233129		SARS_SF1_100_di_-1.ct	Sun_Reactivities_top_20_percent_constrained.DBN	0.129383	0.330916	0.129383	0.330916	0.00226596
SARS_SF1_100_di_-1.ct	Rouskin_DMS_SARS2_Reactivity_top_21_percent_constrained.DBN	0.0624678	0.173378	0.124002	0.390669	0.00235824		SARS_SF1_100_di_-1.ct	Incarnato_SHAPE_SARS2_in_vitro_Reactivity_top_21_percent_constrained.DBN	0.139319	0.326908	0.142586	0.335192	0.00279062		SARS_SF1_100_di_-1.ct	SHAPE_in_vivo_Incar_top_21_percent_constrained.DBN	0.155331	0.305344	0.157005	0.307959	0.002452		SARS_SF1_100_di_-1.ct	Incar_DMS_invitro_Reactivities_top_21_percent_constrained.DBN	0.0716161	0.154866	0.142886	0.351603	0.00205869		SARS_SF1_100_di_-1.ct	Pyle_SHAPE_SARS2_Reactivity_top_21_percent_constrained.DBN	0.178345	0.267462	0.178879	0.267564	0.00232124		SARS_SF1_100_di_-1.ct	Sun_Reactivities_top_21_percent_constrained.DBN	0.134943	0.349141	0.134943	0.349141	0.00194137
SARS_SF1_100_di_-1.ct	Rouskin_DMS_SARS2_Reactivity_top_22_percent_constrained.DBN	0.0659726	0.180725	0.13096	0.407224	0.00283315		SARS_SF1_100_di_-1.ct	Incarnato_SHAPE_SARS2_in_vitro_Reactivity_top_22_percent_constrained.DBN	0.146682	0.341126	0.150121	0.34977	0.00263553		SARS_SF1_100_di_-1.ct	SHAPE_in_vivo_Incar_top_22_percent_constrained.DBN	0.162642	0.320134	0.164394	0.322876	0.00238595		SARS_SF1_100_di_-1.ct	Incar_DMS_invitro_Reactivities_top_22_percent_constrained.DBN	0.0749627	0.162309	0.149563	0.368501	0.00246046		SARS_SF1_100_di_-1.ct	Pyle_SHAPE_SARS2_Reactivity_top_22_percent_constrained.DBN	0.186892	0.280057	0.187452	0.280164	0.00240161		SARS_SF1_100_di_-1.ct	Sun_Reactivities_top_22_percent_constrained.DBN	0.142769	0.363168	0.142769	0.363168	0.00284207
SARS_SF1_100_di_-1.ct	Rouskin_DMS_SARS2_Reactivity_top_23_percent_constrained.DBN	0.0694774	0.187977	0.137917	0.423565	0.00294684		SARS_SF1_100_di_-1.ct	Incarnato_SHAPE_SARS2_in_vitro_Reactivity_top_23_percent_constrained.DBN	0.154302	0.354866	0.15792	0.363859	0.00283755		SARS_SF1_100_di_-1.ct	SHAPE_in_vivo_Incar_top_23_percent_constrained.DBN	0.170571	0.333683	0.172408	0.336541	0.00269709		SARS_SF1_100_di_-1.ct	Incar_DMS_invitro_Reactivities_top_23_percent_constrained.DBN	0.0782577	0.169943	0.156138	0.385832	0.00253654		SARS_SF1_100_di_-1.ct	Pyle_SHAPE_SARS2_Reactivity_top_23_percent_constrained.DBN	0.194924	0.293607	0.195507	0.293719	0.00236613		SARS_SF1_100_di_-1.ct	Sun_Reactivities_top_23_percent_constrained.DBN	0.148999	0.380153	0.148999	0.380153	0.00236825
SARS_SF1_100_di_-1.ct	Rouskin_DMS_SARS2_Reactivity_top_24_percent_constrained.DBN	0.0732399	0.194752	0.145386	0.43883	0.00327753		SARS_SF1_100_di_-1.ct	Incarnato_SHAPE_SARS2_in_vitro_Reactivity_top_24_percent_constrained.DBN	0.163054	0.366508	0.166877	0.375795	0.00336627		SARS_SF1_100_di_-1.ct	SHAPE_in_vivo_Incar_top_24_percent_constrained.DBN	0.178397	0.347424	0.180318	0.350399	0.00277169		SARS_SF1_100_di_-1.ct	Incar_DMS_invitro_Reactivities_top_24_percent_constrained.DBN	0.0820677	0.176527	0.163739	0.40078	0.0030465		SARS_SF1_100_di_-1.ct	Pyle_SHAPE_SARS2_Reactivity_top_24_percent_constrained.DBN	0.203985	0.305344	0.204596	0.30546	0.00277619		SARS_SF1_100_di_-1.ct	Sun_Reactivities_top_24_percent_constrained.DBN	0.155434	0.396756	0.155434	0.396756	0.00255339
SARS_SF1_100_di_-1.ct	Rouskin_DMS_SARS2_Reactivity_top_25_percent_constrained.DBN	0.0768477	0.201813	0.152548	0.454741	0.00325679		SARS_SF1_100_di_-1.ct	Incarnato_SHAPE_SARS2_in_vitro_Reactivity_top_25_percent_constrained.DBN	0.171292	0.379103	0.175308	0.38871	0.00327714		SARS_SF1_100_di_-1.ct	SHAPE_in_vivo_Incar_top_25_percent_constrained.DBN	0.186325	0.360973	0.188333	0.364065	0.00291767		SARS_SF1_100_di_-1.ct	Incar_DMS_invitro_Reactivities_top_25_percent_constrained.DBN	0.0855687	0.183779	0.170724	0.417244	0.0029145		SARS_SF1_100_di_-1.ct	Pyle_SHAPE_SARS2_Reactivity_top_25_percent_constrained.DBN	0.212583	0.317844	0.21322	0.317965	0.00274207		SARS_SF1_100_di_-1.ct	Sun_Reactivities_top_25_percent_constrained.DBN	0.161664	0.41374	0.161664	0.41374	0.00257749
SARS_SF1_100_di_-1.ct	Rouskin_DMS_SARS2_Reactivity_top_26_percent_constrained.DBN	0.0801979	0.209351	0.159198	0.471727	0.00313712		SARS_SF1_100_di_-1.ct	Incarnato_SHAPE_SARS2_in_vitro_Reactivity_top_26_percent_constrained.DBN	0.179323	0.39208	0.183528	0.402015	0.00330458		SARS_SF1_100_di_-1.ct	SHAPE_in_vivo_Incar_top_26_percent_constrained.DBN	0.19446	0.374141	0.196555	0.377346	0.00310266		SARS_SF1_100_di_-1.ct	Incar_DMS_invitro_Reactivities_top_26_percent_constrained.DBN	0.0887607	0.191508	0.177093	0.434792	0.00276909		SARS_SF1_100_di_-1.ct	Pyle_SHAPE_SARS2_Reactivity_top_26_percent_constrained.DBN	0.221387	0.330057	0.22205	0.330183	0.00291564		SARS_SF1_100_di_-1.ct	Sun_Reactivities_top_26_percent_constrained.DBN	0.168872	0.428912	0.168872	0.428912	0.00309158
SARS_SF1_100_di_-1.ct	Rouskin_DMS_SARS2_Reactivity_top_27_percent_constrained.DBN	0.0837543	0.216603	0.166257	0.488067	0.00344553		SARS_SF1_100_di_-1.ct	Incarnato_SHAPE_SARS2_in_vitro_Reactivity_top_27_percent_constrained.DBN	0.187716	0.404389	0.192117	0.414637	0.00356127		SARS_SF1_100_di_-1.ct	SHAPE_in_vivo_Incar_top_27_percent_constrained.DBN	0.201514	0.389313	0.203684	0.392647	0.00279937		SARS_SF1_100_di_-1.ct	Incar_DMS_invitro_Reactivities_top_27_percent_constrained.DBN	0.0922103	0.198855	0.183975	0.451473	0.00310721		SARS_SF1_100_di_-1.ct	Pyle_SHAPE_SARS2_Reactivity_top_27_percent_constrained.DBN	0.229882	0.342748	0.230571	0.342879	0.00292151		SARS_SF1_100_di_-1.ct	Sun_Reactivities_top_27_percent_constrained.DBN	0.176492	0.443321	0.176492	0.443321	0.00337803
SARS_SF1_100_di_-1.ct	Rouskin_DMS_SARS2_Reactivity_top_28_percent_constrained.DBN	0.0877229	0.222996	0.174135	0.502473	0.0039585		SARS_SF1_100_di_-1.ct	Incarnato_SHAPE_SARS2_in_vitro_Reactivity_top_28_percent_constrained.DBN	0.196211	0.416508	0.200811	0.427062	0.00371299		SARS_SF1_100_di_-1.ct	SHAPE_in_vivo_Incar_top_28_percent_constrained.DBN	0.209134	0.403435	0.211386	0.406891	0.00313384		SARS_SF1_100_di_-1.ct	Incar_DMS_invitro_Reactivities_top_28_percent_constrained.DBN	0.096535	0.204485	0.192604	0.464255	0.0040059		SARS_SF1_100_di_-1.ct	Pyle_SHAPE_SARS2_Reactivity_top_28_percent_constrained.DBN	0.238017	0.356107	0.23873	0.356243	0.0029066		SARS_SF1_100_di_-1.ct	Sun_Reactivities_top_28_percent_constrained.DBN	0.183339	0.45916	0.183339	0.45916	0.00314412
SARS_SF1_100_di_-1.ct	Rouskin_DMS_SARS2_Reactivity_top_29_percent_constrained.DBN	0.09164	0.229485	0.181911	0.517093	0.00402078		SARS_SF1_100_di_-1.ct	Incarnato_SHAPE_SARS2_in_vitro_Reactivity_top_29_percent_constrained.DBN	0.204757	0.428531	0.209558	0.439389	0.00384333		SARS_SF1_100_di_-1.ct	SHAPE_in_vivo_Incar_top_29_percent_constrained.DBN	0.218195	0.414885	0.220545	0.418439	0.0038325		SARS_SF1_100_di_-1.ct	Incar_DMS_invitro_Reactivities_top_29_percent_constrained.DBN	0.100963	0.210019	0.201438	0.47682	0.00421228		SARS_SF1_100_di_-1.ct	Pyle_SHAPE_SARS2_Reactivity_top_29_percent_constrained.DBN	0.247387	0.367271	0.248128	0.367411	0.00345308		SARS_SF1_100_di_-1.ct	Sun_Reactivities_top_29_percent_constrained.DBN	0.190856	0.47376	0.190856	0.47376	0.00356118
SARS_SF1_100_di_-1.ct	Rouskin_DMS_SARS2_Reactivity_top_30_percent_constrained.DBN	0.0954025	0.236355	0.18938	0.532574	0.00397768		SARS_SF1_100_di_-1.ct	Incarnato_SHAPE_SARS2_in_vitro_Reactivity_top_30_percent_constrained.DBN	0.214334	0.438645	0.219359	0.44976	0.00440802		SARS_SF1_100_di_-1.ct	SHAPE_in_vivo_Incar_top_30_percent_constrained.DBN	0.22669	0.427385	0.229132	0.431046	0.00370122		SARS_SF1_100_di_-1.ct	Incar_DMS_invitro_Reactivities_top_30_percent_constrained.DBN	0.104773	0.216603	0.20904	0.491768	0.00373814		SARS_SF1_100_di_-1.ct	Pyle_SHAPE_SARS2_Reactivity_top_30_percent_constrained.DBN	0.255728	0.380248	0.256494	0.380393	0.00318222		SARS_SF1_100_di_-1.ct	Sun_Reactivities_top_30_percent_constrained.DBN	0.198116	0.488836	0.198116	0.488836	0.00354867
SARS_SF1_100_di_-1.ct	Rouskin_DMS_SARS2_Reactivity_top_31_percent_constrained.DBN	0.0992166	0.243034	0.196951	0.547624	0.00414612		SARS_SF1_100_di_-1.ct	Incarnato_SHAPE_SARS2_in_vitro_Reactivity_top_31_percent_constrained.DBN	0.222777	0.450859	0.228001	0.462284	0.00399486		SARS_SF1_100_di_-1.ct	SHAPE_in_vivo_Incar_top_31_percent_constrained.DBN	0.235545	0.439218	0.238083	0.44298	0.00396505		SARS_SF1_100_di_-1.ct	Incar_DMS_invitro_Reactivities_top_31_percent_constrained.DBN	0.108737	0.222996	0.216949	0.506282	0.00400449		SARS_SF1_100_di_-1.ct	Pyle_SHAPE_SARS2_Reactivity_top_31_percent_constrained.DBN	0.265253	0.391126	0.266047	0.391275	0.00373798		SARS_SF1_100_di_-1.ct	Sun_Reactivities_top_31_percent_constrained.DBN	0.205015	0.50458	0.205015	0.50458	0.00348112
SARS_SF1_100_di_-1.ct	Rouskin_DMS_SARS2_Reactivity_top_32_percent_constrained.DBN	0.102773	0.250191	0.204011	0.56375	0.00397982		SARS_SF1_100_di_-1.ct	Incarnato_SHAPE_SARS2_in_vitro_Reactivity_top_32_percent_constrained.DBN	0.23189	0.461832	0.237327	0.473535	0.00441647		SARS_SF1_100_di_-1.ct	SHAPE_in_vivo_Incar_top_32_percent_constrained.DBN	0.244247	0.451336	0.246878	0.455202	0.00400339		SARS_SF1_100_di_-1.ct	Incar_DMS_invitro_Reactivities_top_32_percent_constrained.DBN	0.113216	0.22834	0.225886	0.518414	0.00463298		SARS_SF1_100_di_-1.ct	Pyle_SHAPE_SARS2_Reactivity_top_32_percent_constrained.DBN	0.27416	0.403053	0.274981	0.403207	0.00360211		SARS_SF1_100_di_-1.ct	Sun_Reactivities_top_32_percent_constrained.DBN	0.212377	0.519466	0.212377	0.519466	0.00382452
SARS_SF1_100_di_-1.ct	Rouskin_DMS_SARS2_Reactivity_top_33_percent_constrained.DBN	0.106999	0.256107	0.2124	0.57708	0.00484147		SARS_SF1_100_di_-1.ct	Incarnato_SHAPE_SARS2_in_vitro_Reactivity_top_33_percent_constrained.DBN	0.240385	0.47395	0.246022	0.48596	0.00422507		SARS_SF1_100_di_-1.ct	SHAPE_in_vivo_Incar_top_33_percent_constrained.DBN	0.254029	0.46145	0.256765	0.465403	0.00460171		SARS_SF1_100_di_-1.ct	Incar_DMS_invitro_Reactivities_top_33_percent_constrained.DBN	0.116769	0.235496	0.232974	0.534662	0.00378959		SARS_SF1_100_di_-1.ct	Pyle_SHAPE_SARS2_Reactivity_top_33_percent_constrained.DBN	0.282552	0.416031	0.283398	0.416189	0.00350317		SARS_SF1_100_di_-1.ct	Sun_Reactivities_top_33_percent_constrained.DBN	0.220718	0.532538	0.220718	0.532538	0.0044417
SARS_SF1_100_di_-1.ct	Rouskin_DMS_SARS2_Reactivity_top_34_percent_constrained.DBN	0.110968	0.2625	0.220278	0.591486	0.00465975		SARS_SF1_100_di_-1.ct	Incarnato_SHAPE_SARS2_in_vitro_Reactivity_top_34_percent_constrained.DBN	0.248983	0.485878	0.254821	0.49819	0.0043839		SARS_SF1_100_di_-1.ct	SHAPE_in_vivo_Incar_top_34_percent_constrained.DBN	0.263039	0.472996	0.265872	0.477047	0.00434447		SARS_SF1_100_di_-1.ct	Incar_DMS_invitro_Reactivities_top_34_percent_constrained.DBN	0.120888	0.241508	0.241192	0.54831	0.00450589		SARS_SF1_100_di_-1.ct	Pyle_SHAPE_SARS2_Reactivity_top_34_percent_constrained.DBN	0.291973	0.427004	0.292848	0.427167	0.00403674		SARS_SF1_100_di_-1.ct	Sun_Reactivities_top_34_percent_constrained.DBN	0.229779	0.544275	0.229779	0.544275	0.0049319
SARS_SF1_100_di_-1.ct	Rouskin_DMS_SARS2_Reactivity_top_35_percent_constrained.DBN	0.115349	0.268225	0.228975	0.604386	0.00525607		SARS_SF1_100_di_-1.ct	Incarnato_SHAPE_SARS2_in_vitro_Reactivity_top_35_percent_constrained.DBN	0.258405	0.496279	0.264464	0.508854	0.00490675		SARS_SF1_100_di_-1.ct	SHAPE_in_vivo_Incar_top_35_percent_constrained.DBN	0.272255	0.48416	0.275187	0.488307	0.00454866		SARS_SF1_100_di_-1.ct	Incar_DMS_invitro_Reactivities_top_35_percent_constrained.DBN	0.125212	0.247233	0.24982	0.561308	0.00484334		SARS_SF1_100_di_-1.ct	Pyle_SHAPE_SARS2_Reactivity_top_35_percent_constrained.DBN	0.30088	0.438931	0.301782	0.439099	0.00392275		SARS_SF1_100_di_-1.ct	Sun_Reactivities_top_35_percent_constrained.DBN	0.237553	0.558397	0.237553	0.558397	0.00434114
SARS_SF1_100_di_-1.ct	Rouskin_DMS_SARS2_Reactivity_top_36_percent_constrained.DBN	0.119678	0.27395	0.237569	0.617287	0.0053051		SARS_SF1_100_di_-1.ct	Incarnato_SHAPE_SARS2_in_vitro_Reactivity_top_36_percent_constrained.DBN	0.267003	0.508206	0.273264	0.521084	0.00458536		SARS_SF1_100_di_-1.ct	SHAPE_in_vivo_Incar_top_36_percent_constrained.DBN	0.28111	0.496088	0.284138	0.500337	0.00447845		SARS_SF1_100_di_-1.ct	Incar_DMS_invitro_Reactivities_top_36_percent_constrained.DBN	0.129743	0.252481	0.25886	0.573224	0.00518168		SARS_SF1_100_di_-1.ct	Pyle_SHAPE_SARS2_Reactivity_top_36_percent_constrained.DBN	0.309633	0.45124	0.31056	0.451413	0.00396283		SARS_SF1_100_di_-1.ct	Sun_Reactivities_top_36_percent_constrained.DBN	0.246409	0.570515	0.246409	0.570515	0.00505219
SARS_SF1_100_di_-1.ct	Rouskin_DMS_SARS2_Reactivity_top_37_percent_constrained.DBN	0.123905	0.279866	0.245959	0.630617	0.00529063		SARS_SF1_100_di_-1.ct	Incarnato_SHAPE_SARS2_in_vitro_Reactivity_top_37_percent_constrained.DBN	0.274777	0.52166	0.28122	0.534879	0.00425581		SARS_SF1_100_di_-1.ct	SHAPE_in_vivo_Incar_top_37_percent_constrained.DBN	0.290017	0.507824	0.293141	0.512174	0.00461106		SARS_SF1_100_di_-1.ct	Incar_DMS_invitro_Reactivities_top_37_percent_constrained.DBN	0.13381	0.258683	0.266975	0.587305	0.00476601		SARS_SF1_100_di_-1.ct	Pyle_SHAPE_SARS2_Reactivity_top_37_percent_constrained.DBN	0.318591	0.463073	0.319546	0.463249	0.00416243		SARS_SF1_100_di_-1.ct	Sun_Reactivities_top_37_percent_constrained.DBN	0.254544	0.583969	0.254544	0.583969	0.00475041
SARS_SF1_100_di_-1.ct	Rouskin_DMS_SARS2_Reactivity_top_38_percent_constrained.DBN	0.128389	0.285401	0.25486	0.643088	0.00572423		SARS_SF1_100_di_-1.ct	Incarnato_SHAPE_SARS2_in_vitro_Reactivity_top_38_percent_constrained.DBN	0.284251	0.531966	0.290916	0.545446	0.00528833		SARS_SF1_100_di_-1.ct	SHAPE_in_vivo_Incar_top_38_percent_constrained.DBN	0.299027	0.51937	0.302248	0.523819	0.00477041		SARS_SF1_100_di_-1.ct	Incar_DMS_invitro_Reactivities_top_38_percent_constrained.DBN	0.138393	0.263836	0.276117	0.599003	0.00547625		SARS_SF1_100_di_-1.ct	Pyle_SHAPE_SARS2_Reactivity_top_38_percent_constrained.DBN	0.328271	0.473664	0.329254	0.473845	0.0046002		SARS_SF1_100_di_-1.ct	Sun_Reactivities_top_38_percent_constrained.DBN	0.263451	0.595992	0.263451	0.595992	0.00530848
SARS_SF1_100_di_-1.ct	Rouskin_DMS_SARS2_Reactivity_top_39_percent_constrained.DBN	0.133234	0.290172	0.264477	0.653838	0.00628819		SARS_SF1_100_di_-1.ct	Incarnato_SHAPE_SARS2_in_vitro_Reactivity_top_39_percent_constrained.DBN	0.293003	0.543607	0.299874	0.557382	0.00499288		SARS_SF1_100_di_-1.ct	SHAPE_in_vivo_Incar_top_39_percent_constrained.DBN	0.308243	0.530534	0.311563	0.535078	0.00498434		SARS_SF1_100_di_-1.ct	Incar_DMS_invitro_Reactivities_top_39_percent_constrained.DBN	0.142872	0.269275	0.285054	0.611352	0.00546354		SARS_SF1_100_di_-1.ct	Pyle_SHAPE_SARS2_Reactivity_top_39_percent_constrained.DBN	0.337898	0.484256	0.33891	0.484441	0.00467805		SARS_SF1_100_di_-1.ct	Sun_Reactivities_top_39_percent_constrained.DBN	0.271482	0.609637	0.271482	0.609637	0.00489643
SARS_SF1_100_di_-1.ct	Rouskin_DMS_SARS2_Reactivity_top_40_percent_constrained.DBN	0.138491	0.294179	0.274913	0.662868	0.00691759		SARS_SF1_100_di_-1.ct	Incarnato_SHAPE_SARS2_in_vitro_Reactivity_top_40_percent_constrained.DBN	0.302219	0.554389	0.309306	0.568438	0.00536149		SARS_SF1_100_di_-1.ct	SHAPE_in_vivo_Incar_top_40_percent_constrained.DBN	0.317047	0.542462	0.320462	0.547108	0.00486862		SARS_SF1_100_di_-1.ct	Incar_DMS_invitro_Reactivities_top_40_percent_constrained.DBN	0.147248	0.274809	0.293785	0.623917	0.00544766		SARS_SF1_100_di_-1.ct	Pyle_SHAPE_SARS2_Reactivity_top_40_percent_constrained.DBN	0.347011	0.495802	0.348051	0.495991	0.00453346		SARS_SF1_100_di_-1.ct	Sun_Reactivities_top_40_percent_constrained.DBN	0.280492	0.621469	0.280492	0.621469	0.0055994
SARS_SF1_100_di_-1.ct	Rouskin_DMS_SARS2_Reactivity_top_41_percent_constrained.DBN	0.143233	0.299141	0.284326	0.674049	0.00634464		SARS_SF1_100_di_-1.ct	Incarnato_SHAPE_SARS2_in_vitro_Reactivity_top_41_percent_constrained.DBN	0.311898	0.564313	0.319212	0.578613	0.00573186		SARS_SF1_100_di_-1.ct	SHAPE_in_vivo_Incar_top_41_percent_constrained.DBN	0.326417	0.55334	0.329933	0.558079	0.00528572		SARS_SF1_100_di_-1.ct	Incar_DMS_invitro_Reactivities_top_41_percent_constrained.DBN	0.152139	0.279485	0.303544	0.634532	0.00619215		SARS_SF1_100_di_-1.ct	Pyle_SHAPE_SARS2_Reactivity_top_41_percent_constrained.DBN	0.356227	0.507252	0.357294	0.507446	0.00469056		SARS_SF1_100_di_-1.ct	Sun_Reactivities_top_41_percent_constrained.DBN	0.289657	0.633015	0.289657	0.633015	0.0058012
SARS_SF1_100_di_-1.ct	Rouskin_DMS_SARS2_Reactivity_top_42_percent_constrained.DBN	0.147923	0.304198	0.293636	0.685444	0.00638177		SARS_SF1_100_di_-1.ct	Incarnato_SHAPE_SARS2_in_vitro_Reactivity_top_42_percent_constrained.DBN	0.321835	0.57376	0.329381	0.588299	0.0059828		SARS_SF1_100_di_-1.ct	SHAPE_in_vivo_Incar_top_42_percent_constrained.DBN	0.336663	0.562595	0.340289	0.567414	0.00587611		SARS_SF1_100_di_-1.ct	Incar_DMS_invitro_Reactivities_top_42_percent_constrained.DBN	0.156515	0.285019	0.312275	0.647097	0.00565005		SARS_SF1_100_di_-1.ct	Pyle_SHAPE_SARS2_Reactivity_top_42_percent_constrained.DBN	0.365083	0.519275	0.366176	0.519473	0.00461396		SARS_SF1_100_di_-1.ct	Sun_Reactivities_top_42_percent_constrained.DBN	0.298924	0.64437	0.298924	0.64437	0.00597161
SARS_SF1_100_di_-1.ct	Rouskin_DMS_SARS2_Reactivity_top_43_percent_constrained.DBN	0.152819	0.308969	0.303356	0.696194	0.00676678		SARS_SF1_100_di_-1.ct	Incarnato_SHAPE_SARS2_in_vitro_Reactivity_top_43_percent_constrained.DBN	0.33172	0.583302	0.339498	0.598082	0.00605079		SARS_SF1_100_di_-1.ct	SHAPE_in_vivo_Incar_top_43_percent_constrained.DBN	0.345209	0.575	0.348928	0.579925	0.00500976		SARS_SF1_100_di_-1.ct	Incar_DMS_invitro_Reactivities_top_43_percent_constrained.DBN	0.161304	0.289885	0.321828	0.658146	0.00628737		SARS_SF1_100_di_-1.ct	Pyle_SHAPE_SARS2_Reactivity_top_43_percent_constrained.DBN	0.374299	0.530725	0.37542	0.530928	0.00490762		SARS_SF1_100_di_-1.ct	Sun_Reactivities_top_43_percent_constrained.DBN	0.308809	0.65458	0.308809	0.65458	0.00647065
SARS_SF1_100_di_-1.ct	Rouskin_DMS_SARS2_Reactivity_top_44_percent_constrained.DBN	0.157716	0.313645	0.313076	0.70673	0.00686918		SARS_SF1_100_di_-1.ct	Incarnato_SHAPE_SARS2_in_vitro_Reactivity_top_44_percent_constrained.DBN	0.341657	0.592748	0.349668	0.607768	0.0061808		SARS_SF1_100_di_-1.ct	SHAPE_in_vivo_Incar_top_44_percent_constrained.DBN	0.354322	0.586355	0.358139	0.591377	0.00544722		SARS_SF1_100_di_-1.ct	Incar_DMS_invitro_Reactivities_top_44_percent_constrained.DBN	0.165628	0.295515	0.330457	0.670927	0.0057892		SARS_SF1_100_di_-1.ct	Pyle_SHAPE_SARS2_Reactivity_top_44_percent_constrained.DBN	0.383772	0.541603	0.384921	0.54181	0.0051481		SARS_SF1_100_di_-1.ct	Sun_Reactivities_top_44_percent_constrained.DBN	0.318179	0.665744	0.318179	0.665744	0.00623825
SARS_SF1_100_di_-1.ct	Rouskin_DMS_SARS2_Reactivity_top_45_percent_constrained.DBN	0.162715	0.31813	0.323	0.716835	0.00711408		SARS_SF1_100_di_-1.ct	Incarnato_SHAPE_SARS2_in_vitro_Reactivity_top_45_percent_constrained.DBN	0.350667	0.603912	0.358889	0.619215	0.00570991		SARS_SF1_100_di_-1.ct	SHAPE_in_vivo_Incar_top_45_percent_constrained.DBN	0.36431	0.596088	0.368235	0.601193	0.0060695		SARS_SF1_100_di_-1.ct	Incar_DMS_invitro_Reactivities_top_45_percent_constrained.DBN	0.170571	0.300095	0.340318	0.681326	0.00671878		SARS_SF1_100_di_-1.ct	Pyle_SHAPE_SARS2_Reactivity_top_45_percent_constrained.DBN	0.392576	0.553721	0.393752	0.553933	0.00489143		SARS_SF1_100_di_-1.ct	Sun_Reactivities_top_45_percent_constrained.DBN	0.328528	0.675095	0.328528	0.675095	0.00698626
SARS_SF1_100_di_-1.ct	Rouskin_DMS_SARS2_Reactivity_top_46_percent_constrained.DBN	0.168127	0.321947	0.333743	0.725435	0.0077932		SARS_SF1_100_di_-1.ct	Incarnato_SHAPE_SARS2_in_vitro_Reactivity_top_46_percent_constrained.DBN	0.360294	0.613931	0.368743	0.629488	0.00620267		SARS_SF1_100_di_-1.ct	SHAPE_in_vivo_Incar_top_46_percent_constrained.DBN	0.373887	0.606584	0.377914	0.611779	0.00592168		SARS_SF1_100_di_-1.ct	Incar_DMS_invitro_Reactivities_top_46_percent_constrained.DBN	0.175359	0.304866	0.349872	0.692158	0.00661229		SARS_SF1_100_di_-1.ct	Pyle_SHAPE_SARS2_Reactivity_top_46_percent_constrained.DBN	0.401843	0.565076	0.403047	0.565292	0.00525446		SARS_SF1_100_di_-1.ct	Sun_Reactivities_top_46_percent_constrained.DBN	0.338362	0.685401	0.338362	0.685401	0.00674003
SARS_SF1_100_di_-1.ct	Rouskin_DMS_SARS2_Reactivity_top_47_percent_constrained.DBN	0.172714	0.327195	0.342848	0.737261	0.00671334		SARS_SF1_100_di_-1.ct	Incarnato_SHAPE_SARS2_in_vitro_Reactivity_top_47_percent_constrained.DBN	0.370025	0.62376	0.378702	0.639566	0.00636937		SARS_SF1_100_di_-1.ct	SHAPE_in_vivo_Incar_top_47_percent_constrained.DBN	0.38336	0.617271	0.38749	0.622558	0.00596121		SARS_SF1_100_di_-1.ct	Incar_DMS_invitro_Reactivities_top_47_percent_constrained.DBN	0.180508	0.309065	0.360144	0.70169	0.00720791		SARS_SF1_100_di_-1.ct	Pyle_SHAPE_SARS2_Reactivity_top_47_percent_constrained.DBN	0.411522	0.575573	0.412755	0.575792	0.00558993		SARS_SF1_100_di_-1.ct	Sun_Reactivities_top_47_percent_constrained.DBN	0.348298	0.695515	0.348298	0.695515	0.00691111
SARS_SF1_100_di_-1.ct	Rouskin_DMS_SARS2_Reactivity_top_48_percent_constrained.DBN	0.17792	0.331298	0.353182	0.746506	0.00771405		SARS_SF1_100_di_-1.ct	Incarnato_SHAPE_SARS2_in_vitro_Reactivity_top_48_percent_constrained.DBN	0.380528	0.632156	0.389451	0.648175	0.00696742		SARS_SF1_100_di_-1.ct	SHAPE_in_vivo_Incar_top_48_percent_constrained.DBN	0.393451	0.626813	0.397689	0.632182	0.00644815		SARS_SF1_100_di_-1.ct	Incar_DMS_invitro_Reactivities_top_48_percent_constrained.DBN	0.184935	0.314504	0.368978	0.714038	0.00630789		SARS_SF1_100_di_-1.ct	Pyle_SHAPE_SARS2_Reactivity_top_48_percent_constrained.DBN	0.420275	0.587882	0.421534	0.588106	0.00516282		SARS_SF1_100_di_-1.ct	Sun_Reactivities_top_48_percent_constrained.DBN	0.358441	0.705248	0.358441	0.705248	0.00715306
SARS_SF1_100_di_-1.ct	Rouskin_DMS_SARS2_Reactivity_top_49_percent_constrained.DBN	0.183022	0.335592	0.363311	0.756181	0.0076593		SARS_SF1_100_di_-1.ct	Incarnato_SHAPE_SARS2_in_vitro_Reactivity_top_49_percent_constrained.DBN	0.391083	0.640458	0.400253	0.656687	0.00709352		SARS_SF1_100_di_-1.ct	SHAPE_in_vivo_Incar_top_49_percent_constrained.DBN	0.403336	0.636737	0.407681	0.64219	0.00641656		SARS_SF1_100_di_-1.ct	Incar_DMS_invitro_Reactivities_top_49_percent_constrained.DBN	0.189569	0.319656	0.378223	0.725737	0.00670943		SARS_SF1_100_di_-1.ct	Pyle_SHAPE_SARS2_Reactivity_top_49_percent_constrained.DBN	0.429491	0.599237	0.430777	0.599465	0.00554115		SARS_SF1_100_di_-1.ct	Sun_Reactivities_top_49_percent_constrained.DBN	0.368378	0.715363	0.368378	0.715363	0.00710832
SARS_SF1_100_di_-1.ct	Rouskin_DMS_SARS2_Reactivity_top_50_percent_constrained.DBN	0.188537	0.339122	0.374258	0.764137	0.00836532		SARS_SF1_100_di_-1.ct	Incarnato_SHAPE_SARS2_in_vitro_Reactivity_top_50_percent_constrained.DBN	0.401431	0.649141	0.410844	0.66559	0.00704941		SARS_SF1_100_di_-1.ct	SHAPE_in_vivo_Incar_top_50_percent_constrained.DBN	0.412758	0.647615	0.417204	0.653161	0.00622026		SARS_SF1_100_di_-1.ct	Incar_DMS_invitro_Reactivities_top_50_percent_constrained.DBN	0.195181	0.322996	0.38942	0.733319	0.00821076		SARS_SF1_100_di_-1.ct	Pyle_SHAPE_SARS2_Reactivity_top_50_percent_constrained.DBN	0.439479	0.60916	0.440795	0.609393	0.00610494		SARS_SF1_100_di_-1.ct	Sun_Reactivities_top_50_percent_constrained.DBN	0.378675	0.724905	0.378675	0.724905	0.00746439
SARS_SF1_100_di_-1.ct	Rouskin_DMS_SARS2_Reactivity_top_51_percent_constrained.DBN	0.19364	0.343511	0.384387	0.774027	0.00784005		SARS_SF1_100_di_-1.ct	Incarnato_SHAPE_SARS2_in_vitro_Reactivity_top_51_percent_constrained.DBN	0.411265	0.658683	0.420908	0.675374	0.00679716		SARS_SF1_100_di_-1.ct	SHAPE_in_vivo_Incar_top_51_percent_constrained.DBN	0.422798	0.657252	0.427352	0.662881	0.00672678		SARS_SF1_100_di_-1.ct	Incar_DMS_invitro_Reactivities_top_51_percent_constrained.DBN	0.200278	0.327195	0.399589	0.742851	0.00755442		SARS_SF1_100_di_-1.ct	Pyle_SHAPE_SARS2_Reactivity_top_51_percent_constrained.DBN	0.448489	0.620992	0.449832	0.621229	0.005614		SARS_SF1_100_di_-1.ct	Sun_Reactivities_top_51_percent_constrained.DBN	0.389126	0.734065	0.389126	0.734065	0.0076721
SARS_SF1_100_di_-1.ct	Rouskin_DMS_SARS2_Reactivity_top_52_percent_constrained.DBN	0.198588	0.348092	0.394209	0.784347	0.00770384		SARS_SF1_100_di_-1.ct	Incarnato_SHAPE_SARS2_in_vitro_Reactivity_top_52_percent_constrained.DBN	0.421099	0.668321	0.430973	0.685256	0.00689661		SARS_SF1_100_di_-1.ct	SHAPE_in_vivo_Incar_top_52_percent_constrained.DBN	0.432528	0.667462	0.437188	0.673179	0.00662109		SARS_SF1_100_di_-1.ct	Incar_DMS_invitro_Reactivities_top_52_percent_constrained.DBN	0.205375	0.331489	0.409759	0.7526	0.00765356		SARS_SF1_100_di_-1.ct	Pyle_SHAPE_SARS2_Reactivity_top_52_percent_constrained.DBN	0.457396	0.63292	0.458766	0.633162	0.00565644		SARS_SF1_100_di_-1.ct	Sun_Reactivities_top_52_percent_constrained.DBN	0.399423	0.743511	0.399423	0.743511	0.00765599
SARS_SF1_100_di_-1.ct	Rouskin_DMS_SARS2_Reactivity_top_53_percent_constrained.DBN	0.203484	0.352767	0.403929	0.794883	0.00772599		SARS_SF1_100_di_-1.ct	Incarnato_SHAPE_SARS2_in_vitro_Reactivity_top_53_percent_constrained.DBN	0.431447	0.677004	0.441564	0.694159	0.00735199		SARS_SF1_100_di_-1.ct	SHAPE_in_vivo_Incar_top_53_percent_constrained.DBN	0.443289	0.675763	0.448064	0.681551	0.00741279		SARS_SF1_100_di_-1.ct	Incar_DMS_invitro_Reactivities_top_53_percent_constrained.DBN	0.210575	0.335496	0.420134	0.761698	0.00790257		SARS_SF1_100_di_-1.ct	Pyle_SHAPE_SARS2_Reactivity_top_53_percent_constrained.DBN	0.467487	0.642748	0.468887	0.642994	0.00650796		SARS_SF1_100_di_-1.ct	Sun_Reactivities_top_53_percent_constrained.DBN	0.410441	0.751622	0.410441	0.751622	0.00828127
SARS_SF1_100_di_-1.ct	Rouskin_DMS_SARS2_Reactivity_top_54_percent_constrained.DBN	0.208948	0.356489	0.414774	0.803268	0.00871152		SARS_SF1_100_di_-1.ct	Incarnato_SHAPE_SARS2_in_vitro_Reactivity_top_54_percent_constrained.DBN	0.442465	0.684447	0.45284	0.70179	0.00791354		SARS_SF1_100_di_-1.ct	SHAPE_in_vivo_Incar_top_54_percent_constrained.DBN	0.453071	0.685878	0.457952	0.691752	0.00683977		SARS_SF1_100_di_-1.ct	Incar_DMS_invitro_Reactivities_top_54_percent_constrained.DBN	0.215775	0.339599	0.430508	0.771014	0.00799922		SARS_SF1_100_di_-1.ct	Pyle_SHAPE_SARS2_Reactivity_top_54_percent_constrained.DBN	0.477784	0.652099	0.479215	0.652348	0.00673739		SARS_SF1_100_di_-1.ct	Sun_Reactivities_top_54_percent_constrained.DBN	0.421511	0.759637	0.421511	0.759637	0.00840869
SARS_SF1_100_di_-1.ct	Rouskin_DMS_SARS2_Reactivity_top_55_percent_constrained.DBN	0.21472	0.359542	0.426233	0.810148	0.00928347		SARS_SF1_100_di_-1.ct	Incarnato_SHAPE_SARS2_in_vitro_Reactivity_top_55_percent_constrained.DBN	0.453483	0.691889	0.464116	0.709422	0.00799959		SARS_SF1_100_di_-1.ct	SHAPE_in_vivo_Incar_top_55_percent_constrained.DBN	0.463214	0.695324	0.468204	0.70128	0.00718943		SARS_SF1_100_di_-1.ct	Incar_DMS_invitro_Reactivities_top_55_percent_constrained.DBN	0.220975	0.343607	0.440883	0.780113	0.00809362		SARS_SF1_100_di_-1.ct	Pyle_SHAPE_SARS2_Reactivity_top_55_percent_constrained.DBN	0.487257	0.663073	0.488717	0.663326	0.00630271		SARS_SF1_100_di_-1.ct	Sun_Reactivities_top_55_percent_constrained.DBN	0.432323	0.76813	0.432323	0.76813	0.00830496
SARS_SF1_100_di_-1.ct	Rouskin_DMS_SARS2_Reactivity_top_56_percent_constrained.DBN	0.219926	0.363645	0.436566	0.819394	0.00846724		SARS_SF1_100_di_-1.ct	Incarnato_SHAPE_SARS2_in_vitro_Reactivity_top_56_percent_constrained.DBN	0.463832	0.700573	0.474708	0.718325	0.00760793		SARS_SF1_100_di_-1.ct	SHAPE_in_vivo_Incar_top_56_percent_constrained.DBN	0.473717	0.704103	0.47882	0.710134	0.00753889		SARS_SF1_100_di_-1.ct	Incar_DMS_invitro_Reactivities_top_56_percent_constrained.DBN	0.226021	0.347996	0.45095	0.790078	0.00795353		SARS_SF1_100_di_-1.ct	Pyle_SHAPE_SARS2_Reactivity_top_56_percent_constrained.DBN	0.497143	0.673187	0.498632	0.673444	0.00667706		SARS_SF1_100_di_-1.ct	Sun_Reactivities_top_56_percent_constrained.DBN	0.443237	0.776431	0.443237	0.776431	0.00847467
SARS_SF1_100_di_-1.ct	Rouskin_DMS_SARS2_Reactivity_top_57_percent_constrained.DBN	0.226265	0.365649	0.449151	0.823909	0.0103684		SARS_SF1_100_di_-1.ct	Incarnato_SHAPE_SARS2_in_vitro_Reactivity_top_57_percent_constrained.DBN	0.474129	0.709351	0.485246	0.727326	0.00766494		SARS_SF1_100_di_-1.ct	SHAPE_in_vivo_Incar_top_57_percent_constrained.DBN	0.484271	0.712786	0.489488	0.718891	0.00766927		SARS_SF1_100_di_-1.ct	Incar_DMS_invitro_Reactivities_top_57_percent_constrained.DBN	0.231684	0.351145	0.46225	0.797227	0.00900822		SARS_SF1_100_di_-1.ct	Pyle_SHAPE_SARS2_Reactivity_top_57_percent_constrained.DBN	0.506667	0.683969	0.508185	0.684231	0.00653667		SARS_SF1_100_di_-1.ct	Sun_Reactivities_top_57_percent_constrained.DBN	0.453998	0.785019	0.453998	0.785019	0.00844715
SARS_SF1_100_di_-1.ct	Rouskin_DMS_SARS2_Reactivity_top_58_percent_constrained.DBN	0.231883	0.368989	0.460303	0.831434	0.00927218		SARS_SF1_100_di_-1.ct	Incarnato_SHAPE_SARS2_in_vitro_Reactivity_top_58_percent_constrained.DBN	0.485198	0.716698	0.496575	0.73486	0.00832516		SARS_SF1_100_di_-1.ct	SHAPE_in_vivo_Incar_top_58_percent_constrained.DBN	0.495289	0.720611	0.500624	0.726783	0.00809385		SARS_SF1_100_di_-1.ct	Incar_DMS_invitro_Reactivities_top_58_percent_constrained.DBN	0.236884	0.355248	0.472625	0.806542	0.00836783		SARS_SF1_100_di_-1.ct	Pyle_SHAPE_SARS2_Reactivity_top_58_percent_constrained.DBN	0.51645	0.69437	0.517996	0.694635	0.00681543		SARS_SF1_100_di_-1.ct	Sun_Reactivities_top_58_percent_constrained.DBN	0.465582	0.79208	0.465582	0.79208	0.00917562
SARS_SF1_100_di_-1.ct	Rouskin_DMS_SARS2_Reactivity_top_59_percent_constrained.DBN	0.237501	0.372424	0.471455	0.839174	0.0093585		SARS_SF1_100_di_-1.ct	Incarnato_SHAPE_SARS2_in_vitro_Reactivity_top_59_percent_constrained.DBN	0.495958	0.724618	0.507588	0.74298	0.00818226		SARS_SF1_100_di_-1.ct	SHAPE_in_vivo_Incar_top_59_percent_constrained.DBN	0.505483	0.729962	0.510928	0.736214	0.00758589		SARS_SF1_100_di_-1.ct	Incar_DMS_invitro_Reactivities_top_59_percent_constrained.DBN	0.242445	0.358588	0.483719	0.814125	0.00903189		SARS_SF1_100_di_-1.ct	Pyle_SHAPE_SARS2_Reactivity_top_59_percent_constrained.DBN	0.525305	0.706393	0.526878	0.706663	0.00627658		SARS_SF1_100_di_-1.ct	Sun_Reactivities_top_59_percent_constrained.DBN	0.47624	0.800859	0.47624	0.800859	0.00853513
SARS_SF1_100_di_-1.ct	Rouskin_DMS_SARS2_Reactivity_top_60_percent_constrained.DBN	0.242965	0.37605	0.4823	0.847345	0.00918954		SARS_SF1_100_di_-1.ct	Incarnato_SHAPE_SARS2_in_vitro_Reactivity_top_60_percent_constrained.DBN	0.506667	0.732634	0.518548	0.751199	0.00823318		SARS_SF1_100_di_-1.ct	SHAPE_in_vivo_Incar_top_60_percent_constrained.DBN	0.516141	0.738454	0.521701	0.744779	0.00802296		SARS_SF1_100_di_-1.ct	Incar_DMS_invitro_Reactivities_top_60_percent_constrained.DBN	0.247645	0.362691	0.494093	0.82344	0.00854314		SARS_SF1_100_di_-1.ct	Pyle_SHAPE_SARS2_Reactivity_top_60_percent_constrained.DBN	0.534624	0.717653	0.536225	0.717927	0.00671029		SARS_SF1_100_di_-1.ct	Sun_Reactivities_top_60_percent_constrained.DBN	0.487463	0.808588	0.487463	0.808588	0.00907543
SARS_SF1_100_di_-1.ct	Rouskin_DMS_SARS2_Reactivity_top_61_percent_constrained.DBN	0.248789	0.379008	0.493861	0.85401	0.00987345		SARS_SF1_100_di_-1.ct	Incarnato_SHAPE_SARS2_in_vitro_Reactivity_top_61_percent_constrained.DBN	0.51645	0.742366	0.528559	0.761178	0.0076206		SARS_SF1_100_di_-1.ct	SHAPE_in_vivo_Incar_top_61_percent_constrained.DBN	0.526438	0.747615	0.532109	0.754018	0.00784781		SARS_SF1_100_di_-1.ct	Incar_DMS_invitro_Reactivities_top_61_percent_constrained.DBN	0.253153	0.366126	0.505085	0.831239	0.00913637		SARS_SF1_100_di_-1.ct	Pyle_SHAPE_SARS2_Reactivity_top_61_percent_constrained.DBN	0.545024	0.726813	0.546656	0.72709	0.00758442		SARS_SF1_100_di_-1.ct	Sun_Reactivities_top_61_percent_constrained.DBN	0.498378	0.816889	0.498378	0.816889	0.00891626
SARS_SF1_100_di_-1.ct	Rouskin_DMS_SARS2_Reactivity_top_62_percent_constrained.DBN	0.254046	0.383111	0.504297	0.863255	0.0090088		SARS_SF1_100_di_-1.ct	Incarnato_SHAPE_SARS2_in_vitro_Reactivity_top_62_percent_constrained.DBN	0.527364	0.75	0.53973	0.769005	0.00859042		SARS_SF1_100_di_-1.ct	SHAPE_in_vivo_Incar_top_62_percent_constrained.DBN	0.537147	0.756011	0.542933	0.762487	0.0082534		SARS_SF1_100_di_-1.ct	Incar_DMS_invitro_Reactivities_top_62_percent_constrained.DBN	0.258508	0.369943	0.515768	0.839905	0.00897279		SARS_SF1_100_di_-1.ct	Pyle_SHAPE_SARS2_Reactivity_top_62_percent_constrained.DBN	0.554755	0.737214	0.556416	0.737495	0.00719786		SARS_SF1_100_di_-1.ct	Sun_Reactivities_top_62_percent_constrained.DBN	0.510014	0.823855	0.510014	0.823855	0.00958612
SARS_SF1_100_di_-1.ct	Rouskin_DMS_SARS2_Reactivity_top_63_percent_constrained.DBN	0.25987	0.386069	0.515858	0.86992	0.0100574		SARS_SF1_100_di_-1.ct	Incarnato_SHAPE_SARS2_in_vitro_Reactivity_top_63_percent_constrained.DBN	0.538228	0.757729	0.550848	0.77693	0.00863801		SARS_SF1_100_di_-1.ct	SHAPE_in_vivo_Incar_top_63_percent_constrained.DBN	0.548576	0.763073	0.554486	0.769608	0.00889119		SARS_SF1_100_di_-1.ct	Incar_DMS_invitro_Reactivities_top_63_percent_constrained.DBN	0.263914	0.373569	0.526554	0.848137	0.00914786		SARS_SF1_100_di_-1.ct	Pyle_SHAPE_SARS2_Reactivity_top_63_percent_constrained.DBN	0.565103	0.746565	0.566796	0.74685	0.00775197		SARS_SF1_100_di_-1.ct	Sun_Reactivities_top_63_percent_constrained.DBN	0.521341	0.831393	0.521341	0.831393	0.00941701
SARS_SF1_100_di_-1.ct	Rouskin_DMS_SARS2_Reactivity_top_64_percent_constrained.DBN	0.26621	0.388073	0.528443	0.874436	0.0110043		SARS_SF1_100_di_-1.ct	Incarnato_SHAPE_SARS2_in_vitro_Reactivity_top_64_percent_constrained.DBN	0.549091	0.765458	0.561966	0.784855	0.00872612		SARS_SF1_100_di_-1.ct	SHAPE_in_vivo_Incar_top_64_percent_constrained.DBN	0.558874	0.772233	0.564894	0.778847	0.00810624		SARS_SF1_100_di_-1.ct	Incar_DMS_invitro_Reactivities_top_64_percent_constrained.DBN	0.26968	0.376622	0.538059	0.855069	0.00983747		SARS_SF1_100_di_-1.ct	Pyle_SHAPE_SARS2_Reactivity_top_64_percent_constrained.DBN	0.575606	0.755534	0.57733	0.755823	0.00796219		SARS_SF1_100_di_-1.ct	Sun_Reactivities_top_64_percent_constrained.DBN	0.532873	0.83855	0.532873	0.83855	0.00967076
SARS_SF1_100_di_-1.ct	Rouskin_DMS_SARS2_Reactivity_top_65_percent_constrained.DBN	0.272446	0.390267	0.540823	0.879381	0.0108865		SARS_SF1_100_di_-1.ct	Incarnato_SHAPE_SARS2_in_vitro_Reactivity_top_65_percent_constrained.DBN	0.559749	0.773569	0.572874	0.793171	0.00865141		SARS_SF1_100_di_-1.ct	SHAPE_in_vivo_Incar_top_65_percent_constrained.DBN	0.569325	0.781202	0.575458	0.787893	0.00832339		SARS_SF1_100_di_-1.ct	Incar_DMS_invitro_Reactivities_top_65_percent_constrained.DBN	0.275498	0.379485	0.549666	0.861568	0.0100007		SARS_SF1_100_di_-1.ct	Pyle_SHAPE_SARS2_Reactivity_top_65_percent_constrained.DBN	0.585388	0.765935	0.587142	0.766228	0.00751785		SARS_SF1_100_di_-1.ct	Sun_Reactivities_top_65_percent_constrained.DBN	0.544818	0.844943	0.544818	0.844943	0.0100925
SARS_SF1_100_di_-1.ct	Rouskin_DMS_SARS2_Reactivity_top_66_percent_constrained.DBN	0.27858	0.392653	0.552998	0.884756	0.010772		SARS_SF1_100_di_-1.ct	Incarnato_SHAPE_SARS2_in_vitro_Reactivity_top_66_percent_constrained.DBN	0.570355	0.781775	0.583729	0.801585	0.00870094		SARS_SF1_100_di_-1.ct	SHAPE_in_vivo_Incar_top_66_percent_constrained.DBN	0.579777	0.790076	0.586022	0.796843	0.00841794		SARS_SF1_100_di_-1.ct	Incar_DMS_invitro_Reactivities_top_66_percent_constrained.DBN	0.281728	0.381679	0.562096	0.866551	0.0107707		SARS_SF1_100_di_-1.ct	Pyle_SHAPE_SARS2_Reactivity_top_66_percent_constrained.DBN	0.595377	0.775859	0.59716	0.776155	0.00777558		SARS_SF1_100_di_-1.ct	Sun_Reactivities_top_66_percent_constrained.DBN	0.55666	0.851527	0.55666	0.851527	0.0100835
SARS_SF1_100_di_-1.ct	Rouskin_DMS_SARS2_Reactivity_top_67_percent_constrained.DBN	0.284816	0.394943	0.565378	0.889916	0.011017		SARS_SF1_100_di_-1.ct	Incarnato_SHAPE_SARS2_in_vitro_Reactivity_top_67_percent_constrained.DBN	0.580909	0.790076	0.594531	0.810097	0.00875065		SARS_SF1_100_di_-1.ct	SHAPE_in_vivo_Incar_top_67_percent_constrained.DBN	0.590846	0.797805	0.597211	0.804639	0.00900277		SARS_SF1_100_di_-1.ct	Incar_DMS_invitro_Reactivities_top_67_percent_constrained.DBN	0.28734	0.384924	0.573292	0.873917	0.009785		SARS_SF1_100_di_-1.ct	Pyle_SHAPE_SARS2_Reactivity_top_67_percent_constrained.DBN	0.606034	0.784542	0.607849	0.784842	0.00838948		SARS_SF1_100_di_-1.ct	Sun_Reactivities_top_67_percent_constrained.DBN	0.568501	0.858111	0.568501	0.858111	0.0101614
SARS_SF1_100_di_-1.ct	Rouskin_DMS_SARS2_Reactivity_top_68_percent_constrained.DBN	0.291052	0.397137	0.577757	0.894861	0.0110782		SARS_SF1_100_di_-1.ct	Incarnato_SHAPE_SARS2_in_vitro_Reactivity_top_68_percent_constrained.DBN	0.59203	0.797328	0.605912	0.817533	0.00930483		SARS_SF1_100_di_-1.ct	SHAPE_in_vivo_Incar_top_68_percent_constrained.DBN	0.602533	0.804389	0.609024	0.811279	0.0095837		SARS_SF1_100_di_-1.ct	Incar_DMS_invitro_Reactivities_top_68_percent_constrained.DBN	0.293364	0.3875	0.585311	0.879766	0.0105735		SARS_SF1_100_di_-1.ct	Pyle_SHAPE_SARS2_Reactivity_top_68_percent_constrained.DBN	0.616177	0.794275	0.618022	0.794578	0.00808324		SARS_SF1_100_di_-1.ct	Sun_Reactivities_top_68_percent_constrained.DBN	0.581218	0.863073	0.581218	0.863073	0.0109756
SARS_SF1_100_di_-1.ct	Rouskin_DMS_SARS2_Reactivity_top_69_percent_constrained.DBN	0.296877	0.400095	0.589319	0.901527	0.0104228		SARS_SF1_100_di_-1.ct	Incarnato_SHAPE_SARS2_in_vitro_Reactivity_top_69_percent_constrained.DBN	0.604181	0.802672	0.618348	0.823011	0.0102345		SARS_SF1_100_di_-1.ct	SHAPE_in_vivo_Incar_top_69_percent_constrained.DBN	0.613448	0.812405	0.620056	0.819363	0.0090396		SARS_SF1_100_di_-1.ct	Incar_DMS_invitro_Reactivities_top_69_percent_constrained.DBN	0.299387	0.389981	0.597329	0.885399	0.0106412		SARS_SF1_100_di_-1.ct	Pyle_SHAPE_SARS2_Reactivity_top_69_percent_constrained.DBN	0.626783	0.803053	0.62866	0.80336	0.00854594		SARS_SF1_100_di_-1.ct	Sun_Reactivities_top_69_percent_constrained.DBN	0.593163	0.869466	0.593163	0.869466	0.0103854
SARS_SF1_100_di_-1.ct	Rouskin_DMS_SARS2_Reactivity_top_70_percent_constrained.DBN	0.303113	0.402385	0.601698	0.906687	0.0112246		SARS_SF1_100_di_-1.ct	Incarnato_SHAPE_SARS2_in_vitro_Reactivity_top_70_percent_constrained.DBN	0.615559	0.809447	0.629993	0.829958	0.00966491		SARS_SF1_100_di_-1.ct	SHAPE_in_vivo_Incar_top_70_percent_constrained.DBN	0.624878	0.819466	0.631609	0.826484	0.00954827		SARS_SF1_100_di_-1.ct	Incar_DMS_invitro_Reactivities_top_70_percent_constrained.DBN	0.305463	0.392462	0.60945	0.891031	0.0108004		SARS_SF1_100_di_-1.ct	Pyle_SHAPE_SARS2_Reactivity_top_70_percent_constrained.DBN	0.63708	0.8125	0.638988	0.81281	0.00839463		SARS_SF1_100_di_-1.ct	Sun_Reactivities_top_70_percent_constrained.DBN	0.605056	0.875954	0.605056	0.875954	0.0104178
SARS_SF1_100_di_-1.ct	Rouskin_DMS_SARS2_Reactivity_top_71_percent_constrained.DBN	0.309453	0.404389	0.614283	0.911202	0.0114669		SARS_SF1_100_di_-1.ct	Incarnato_SHAPE_SARS2_in_vitro_Reactivity_top_71_percent_constrained.DBN	0.627143	0.81584	0.641848	0.836513	0.00991756		SARS_SF1_100_di_-1.ct	SHAPE_in_vivo_Incar_top_71_percent_constrained.DBN	0.635535	0.827958	0.642381	0.83505	0.00899538		SARS_SF1_100_di_-1.ct	Incar_DMS_invitro_Reactivities_top_71_percent_constrained.DBN	0.311589	0.394752	0.621674	0.896231	0.0109555		SARS_SF1_100_di_-1.ct	Pyle_SHAPE_SARS2_Reactivity_top_71_percent_constrained.DBN	0.647325	0.821947	0.649264	0.82226	0.00844977		SARS_SF1_100_di_-1.ct	Sun_Reactivities_top_71_percent_constrained.DBN	0.617464	0.881489	0.617464	0.881489	0.0109375
SARS_SF1_100_di_-1.ct	Rouskin_DMS_SARS2_Reactivity_top_72_percent_constrained.DBN	0.315947	0.406107	0.627174	0.915072	0.0117965		SARS_SF1_100_di_-1.ct	Incarnato_SHAPE_SARS2_in_vitro_Reactivity_top_72_percent_constrained.DBN	0.638418	0.822805	0.653388	0.843655	0.00973551		SARS_SF1_100_di_-1.ct	SHAPE_in_vivo_Incar_top_72_percent_constrained.DBN	0.646708	0.835496	0.653674	0.842652	0.0095158		SARS_SF1_100_di_-1.ct	Incar_DMS_invitro_Reactivities_top_72_percent_constrained.DBN	0.317922	0.396756	0.634309	0.90078	0.0113812		SARS_SF1_100_di_-1.ct	Pyle_SHAPE_SARS2_Reactivity_top_72_percent_constrained.DBN	0.657725	0.831202	0.659695	0.83152	0.00867374		SARS_SF1_100_di_-1.ct	Sun_Reactivities_top_72_percent_constrained.DBN	0.629975	0.886832	0.629975	0.886832	0.0110951
SARS_SF1_100_di_-1.ct	Rouskin_DMS_SARS2_Reactivity_top_73_percent_constrained.DBN	0.32208	0.408492	0.639349	0.920447	0.0112066		SARS_SF1_100_di_-1.ct	Incarnato_SHAPE_SARS2_in_vitro_Reactivity_top_73_percent_constrained.DBN	0.650311	0.828626	0.66556	0.849623	0.0103416		SARS_SF1_100_di_-1.ct	SHAPE_in_vivo_Incar_top_73_percent_constrained.DBN	0.657725	0.843321	0.664811	0.850544	0.00947213		SARS_SF1_100_di_-1.ct	Incar_DMS_invitro_Reactivities_top_73_percent_constrained.DBN	0.323482	0.400095	0.645403	0.908362	0.0100774		SARS_SF1_100_di_-1.ct	Pyle_SHAPE_SARS2_Reactivity_top_73_percent_constrained.DBN	0.668692	0.839313	0.670695	0.839633	0.00923532		SARS_SF1_100_di_-1.ct	Sun_Reactivities_top_73_percent_constrained.DBN	0.64264	0.891889	0.64264	0.891889	0.0112961
SARS_SF1_100_di_-1.ct	Rouskin_DMS_SARS2_Reactivity_top_74_percent_constrained.DBN	0.328317	0.410687	0.651729	0.925392	0.0114562		SARS_SF1_100_di_-1.ct	Incarnato_SHAPE_SARS2_in_vitro_Reactivity_top_74_percent_constrained.DBN	0.662359	0.83416	0.67789	0.855298	0.0105459		SARS_SF1_100_di_-1.ct	SHAPE_in_vivo_Incar_top_74_percent_constrained.DBN	0.669516	0.849714	0.676728	0.856992	0.0102129		SARS_SF1_100_di_-1.ct	Incar_DMS_invitro_Reactivities_top_74_percent_constrained.DBN	0.329815	0.402099	0.658038	0.912912	0.0115345		SARS_SF1_100_di_-1.ct	Pyle_SHAPE_SARS2_Reactivity_top_74_percent_constrained.DBN	0.680019	0.846756	0.682055	0.847079	0.00962341		SARS_SF1_100_di_-1.ct	Sun_Reactivities_top_74_percent_constrained.DBN	0.655151	0.897233	0.655151	0.897233	0.0112252
SARS_SF1_100_di_-1.ct	Rouskin_DMS_SARS2_Reactivity_top_75_percent_constrained.DBN	0.334965	0.412214	0.664927	0.928833	0.012259		SARS_SF1_100_di_-1.ct	Incarnato_SHAPE_SARS2_in_vitro_Reactivity_top_75_percent_constrained.DBN	0.673531	0.841317	0.689324	0.862636	0.00986363		SARS_SF1_100_di_-1.ct	SHAPE_in_vivo_Incar_top_75_percent_constrained.DBN	0.6811	0.856489	0.688437	0.863824	0.0101145		SARS_SF1_100_di_-1.ct	Incar_DMS_invitro_Reactivities_top_75_percent_constrained.DBN	0.336251	0.403817	0.670878	0.916811	0.0117721		SARS_SF1_100_di_-1.ct	Pyle_SHAPE_SARS2_Reactivity_top_75_percent_constrained.DBN	0.691294	0.854389	0.693364	0.854716	0.00966603		SARS_SF1_100_di_-1.ct	Sun_Reactivities_top_75_percent_constrained.DBN	0.668074	0.901813	0.668074	0.901813	0.011654
SARS_SF1_100_di_-1.ct	Rouskin_DMS_SARS2_Reactivity_top_76_percent_constrained.DBN	0.341099	0.414599	0.677103	0.934208	0.0113741		SARS_SF1_100_di_-1.ct	Incarnato_SHAPE_SARS2_in_vitro_Reactivity_top_76_percent_constrained.DBN	0.68424	0.849332	0.700285	0.870854	0.00954461		SARS_SF1_100_di_-1.ct	SHAPE_in_vivo_Incar_top_76_percent_constrained.DBN	0.693044	0.862595	0.70051	0.869984	0.0105035		SARS_SF1_100_di_-1.ct	Incar_DMS_invitro_Reactivities_top_76_percent_constrained.DBN	0.342532	0.405916	0.68341	0.921577	0.0115493		SARS_SF1_100_di_-1.ct	Pyle_SHAPE_SARS2_Reactivity_top_76_percent_constrained.DBN	0.702363	0.862309	0.704467	0.862638	0.00957745		SARS_SF1_100_di_-1.ct	Sun_Reactivities_top_76_percent_constrained.DBN	0.680945	0.906489	0.680945	0.906489	0.0116677
SARS_SF1_100_di_-1.ct	Rouskin_DMS_SARS2_Reactivity_top_77_percent_constrained.DBN	0.347696	0.416126	0.690198	0.937648	0.0122794		SARS_SF1_100_di_-1.ct	Incarnato_SHAPE_SARS2_in_vitro_Reactivity_top_77_percent_constrained.DBN	0.695155	0.856966	0.711455	0.878681	0.0098156		SARS_SF1_100_di_-1.ct	SHAPE_in_vivo_Incar_top_77_percent_constrained.DBN	0.704886	0.868893	0.712479	0.876335	0.010489		SARS_SF1_100_di_-1.ct	Incar_DMS_invitro_Reactivities_top_77_percent_constrained.DBN	0.348762	0.408015	0.69584	0.926343	0.0115139		SARS_SF1_100_di_-1.ct	Pyle_SHAPE_SARS2_Reactivity_top_77_percent_constrained.DBN	0.71333	0.870515	0.715466	0.870848	0.00957865		SARS_SF1_100_di_-1.ct	Sun_Reactivities_top_77_percent_constrained.DBN	0.693765	0.91126	0.693765	0.91126	0.0116822
SARS_SF1_100_di_-1.ct	Rouskin_DMS_SARS2_Reactivity_top_78_percent_constrained.DBN	0.354242	0.417844	0.703192	0.941518	0.0122338		SARS_SF1_100_di_-1.ct	Incarnato_SHAPE_SARS2_in_vitro_Reactivity_top_78_percent_constrained.DBN	0.707254	0.862405	0.723838	0.884258	0.0109496		SARS_SF1_100_di_-1.ct	SHAPE_in_vivo_Incar_top_78_percent_constrained.DBN	0.716264	0.87605	0.72398	0.883553	0.0101616		SARS_SF1_100_di_-1.ct	Incar_DMS_invitro_Reactivities_top_78_percent_constrained.DBN	0.355146	0.409924	0.708577	0.930676	0.0118545		SARS_SF1_100_di_-1.ct	Pyle_SHAPE_SARS2_Reactivity_top_78_percent_constrained.DBN	0.72409	0.879008	0.726259	0.879343	0.00949046		SARS_SF1_100_di_-1.ct	Sun_Reactivities_top_78_percent_constrained.DBN	0.706482	0.916221	0.706482	0.916221	0.0116515
SARS_SF1_100_di_-1.ct	Rouskin_DMS_SARS2_Reactivity_top_79_percent_constrained.DBN	0.360891	0.419275	0.71639	0.944743	0.012469		SARS_SF1_100_di_-1.ct	Incarnato_SHAPE_SARS2_in_vitro_Reactivity_top_79_percent_constrained.DBN	0.718787	0.868893	0.735641	0.890911	0.0105155		SARS_SF1_100_di_-1.ct	SHAPE_in_vivo_Incar_top_79_percent_constrained.DBN	0.728157	0.882347	0.736001	0.889905	0.0106978		SARS_SF1_100_di_-1.ct	Incar_DMS_invitro_Reactivities_top_79_percent_constrained.DBN	0.361015	0.412691	0.720288	0.936958	0.0109721		SARS_SF1_100_di_-1.ct	Pyle_SHAPE_SARS2_Reactivity_top_79_percent_constrained.DBN	0.734696	0.887786	0.736896	0.888125	0.00944765		SARS_SF1_100_di_-1.ct	Sun_Reactivities_top_79_percent_constrained.DBN	0.719096	0.921374	0.719096	0.921374	0.0116221
SARS_SF1_100_di_-1.ct	Rouskin_DMS_SARS2_Reactivity_top_80_percent_constrained.DBN	0.367436	0.420897	0.729384	0.948398	0.0123232		SARS_SF1_100_di_-1.ct	Incarnato_SHAPE_SARS2_in_vitro_Reactivity_top_80_percent_constrained.DBN	0.730577	0.874905	0.747708	0.897075	0.0108246		SARS_SF1_100_di_-1.ct	SHAPE_in_vivo_Incar_top_80_percent_constrained.DBN	0.739896	0.888836	0.747866	0.896449	0.0106365		SARS_SF1_100_di_-1.ct	Incar_DMS_invitro_Reactivities_top_80_percent_constrained.DBN	0.366936	0.415458	0.732101	0.943241	0.0111425		SARS_SF1_100_di_-1.ct	Pyle_SHAPE_SARS2_Reactivity_top_80_percent_constrained.DBN	0.745302	0.89666	0.747534	0.897003	0.00954209		SARS_SF1_100_di_-1.ct	Sun_Reactivities_top_80_percent_constrained.DBN	0.731504	0.926908	0.731504	0.926908	0.0115011
SARS_SF1_100_di_-1.ct	Rouskin_DMS_SARS2_Reactivity_top_81_percent_constrained.DBN	0.374291	0.421947	0.742992	0.950763	0.0129375		SARS_SF1_100_di_-1.ct	Incarnato_SHAPE_SARS2_in_vitro_Reactivity_top_81_percent_constrained.DBN	0.742522	0.88063	0.759933	0.902945	0.0110382		SARS_SF1_100_di_-1.ct	SHAPE_in_vivo_Incar_top_81_percent_constrained.DBN	0.751738	0.895134	0.759836	0.902801	0.0108058		SARS_SF1_100_di_-1.ct	Incar_DMS_invitro_Reactivities_top_81_percent_constrained.DBN	0.373063	0.417748	0.744325	0.94844	0.0115937		SARS_SF1_100_di_-1.ct	Pyle_SHAPE_SARS2_Reactivity_top_81_percent_constrained.DBN	0.757092	0.903244	0.75936	0.903589	0.0106854		SARS_SF1_100_di_-1.ct	Sun_Reactivities_top_81_percent_constrained.DBN	0.744839	0.930725	0.744839	0.930725	0.0124109
SARS_SF1_100_di_-1.ct	Rouskin_DMS_SARS2_Reactivity_top_82_percent_constrained.DBN	0.380837	0.423569	0.755985	0.954418	0.0124014		SARS_SF1_100_di_-1.ct	Incarnato_SHAPE_SARS2_in_vitro_Reactivity_top_82_percent_constrained.DBN	0.754466	0.886355	0.772157	0.908815	0.01111		SARS_SF1_100_di_-1.ct	SHAPE_in_vivo_Incar_top_82_percent_constrained.DBN	0.76327	0.902004	0.771493	0.90973	0.0106047		SARS_SF1_100_di_-1.ct	Incar_DMS_invitro_Reactivities_top_82_percent_constrained.DBN	0.380013	0.418607	0.758192	0.95039	0.0131795		SARS_SF1_100_di_-1.ct	Pyle_SHAPE_SARS2_Reactivity_top_82_percent_constrained.DBN	0.769397	0.908969	0.771702	0.909317	0.0112227		SARS_SF1_100_di_-1.ct	Sun_Reactivities_top_82_percent_constrained.DBN	0.757967	0.934924	0.757967	0.934924	0.0122744
SARS_SF1_100_di_-1.ct	Rouskin_DMS_SARS2_Reactivity_top_83_percent_constrained.DBN	0.387331	0.425382	0.768877	0.958504	0.0123564		SARS_SF1_100_di_-1.ct	Incarnato_SHAPE_SARS2_in_vitro_Reactivity_top_83_percent_constrained.DBN	0.766257	0.892366	0.784224	0.914979	0.0110407		SARS_SF1_100_di_-1.ct	SHAPE_in_vivo_Incar_top_83_percent_constrained.DBN	0.775472	0.907634	0.783826	0.915408	0.0112902		SARS_SF1_100_di_-1.ct	Incar_DMS_invitro_Reactivities_top_83_percent_constrained.DBN	0.386604	0.420038	0.771341	0.95364	0.0125389		SARS_SF1_100_di_-1.ct	Pyle_SHAPE_SARS2_Reactivity_top_83_percent_constrained.DBN	0.781084	0.915744	0.783424	0.916094	0.0107386		SARS_SF1_100_di_-1.ct	Sun_Reactivities_top_83_percent_constrained.DBN	0.770375	0.940458	0.770375	0.940458	0.0116692
SARS_SF1_100_di_-1.ct	Rouskin_DMS_SARS2_Reactivity_top_84_percent_constrained.DBN	0.394083	0.426622	0.78228	0.961299	0.0128842		SARS_SF1_100_di_-1.ct	Incarnato_SHAPE_SARS2_in_vitro_Reactivity_top_84_percent_constrained.DBN	0.778304	0.897901	0.796554	0.920654	0.0113517		SARS_SF1_100_di_-1.ct	SHAPE_in_vivo_Incar_top_84_percent_constrained.DBN	0.787777	0.913073	0.796264	0.920893	0.0114537		SARS_SF1_100_di_-1.ct	Incar_DMS_invitro_Reactivities_top_84_percent_constrained.DBN	0.393142	0.42166	0.784386	0.957322	0.012489		SARS_SF1_100_di_-1.ct	Pyle_SHAPE_SARS2_Reactivity_top_84_percent_constrained.DBN	0.792463	0.923092	0.794836	0.923444	0.0105387		SARS_SF1_100_di_-1.ct	Sun_Reactivities_top_84_percent_constrained.DBN	0.782835	0.945992	0.782835	0.945992	0.0117865
SARS_SF1_100_di_-1.ct	Rouskin_DMS_SARS2_Reactivity_top_85_percent_constrained.DBN	0.40099	0.427576	0.795989	0.963449	0.0132087		SARS_SF1_100_di_-1.ct	Incarnato_SHAPE_SARS2_in_vitro_Reactivity_top_85_percent_constrained.DBN	0.789785	0.904485	0.808304	0.927404	0.0108974		SARS_SF1_100_di_-1.ct	SHAPE_in_vivo_Incar_top_85_percent_constrained.DBN	0.800391	0.917939	0.809013	0.925801	0.0118038		SARS_SF1_100_di_-1.ct	Incar_DMS_invitro_Reactivities_top_85_percent_constrained.DBN	0.399732	0.423092	0.797535	0.960572	0.01263		SARS_SF1_100_di_-1.ct	Pyle_SHAPE_SARS2_Reactivity_top_85_percent_constrained.DBN	0.804356	0.92958	0.806765	0.929935	0.011093		SARS_SF1_100_di_-1.ct	Sun_Reactivities_top_85_percent_constrained.DBN	0.795706	0.950668	0.795706	0.950668	0.0122364
SARS_SF1_100_di_-1.ct	Rouskin_DMS_SARS2_Reactivity_top_86_percent_constrained.DBN	0.407845	0.428721	0.809597	0.966029	0.0131453		SARS_SF1_100_di_-1.ct	Incarnato_SHAPE_SARS2_in_vitro_Reactivity_top_86_percent_constrained.DBN	0.801421	0.910782	0.820213	0.933862	0.0111209		SARS_SF1_100_di_-1.ct	SHAPE_in_vivo_Incar_top_86_percent_constrained.DBN	0.812696	0.923378	0.821451	0.931287	0.0115829		SARS_SF1_100_di_-1.ct	Incar_DMS_invitro_Reactivities_top_86_percent_constrained.DBN	0.406631	0.424046	0.811299	0.962738	0.0132519		SARS_SF1_100_di_-1.ct	Pyle_SHAPE_SARS2_Reactivity_top_86_percent_constrained.DBN	0.816815	0.934924	0.819262	0.935281	0.011688		SARS_SF1_100_di_-1.ct	Sun_Reactivities_top_86_percent_constrained.DBN	0.808577	0.955344	0.808577	0.955344	0.0122965
SARS_SF1_100_di_-1.ct	Rouskin_DMS_SARS2_Reactivity_top_87_percent_constrained.DBN	0.414648	0.429866	0.823102	0.968609	0.0130813		SARS_SF1_100_di_-1.ct	Incarnato_SHAPE_SARS2_in_vitro_Reactivity_top_87_percent_constrained.DBN	0.813675	0.915935	0.832754	0.939145	0.0117777		SARS_SF1_100_di_-1.ct	SHAPE_in_vivo_Incar_top_87_percent_constrained.DBN	0.824383	0.929962	0.833264	0.937927	0.0110798		SARS_SF1_100_di_-1.ct	Incar_DMS_invitro_Reactivities_top_87_percent_constrained.DBN	0.413324	0.425286	0.824653	0.965555	0.0128939		SARS_SF1_100_di_-1.ct	Pyle_SHAPE_SARS2_Reactivity_top_87_percent_constrained.DBN	0.829686	0.939599	0.832171	0.939958	0.0121348		SARS_SF1_100_di_-1.ct	Sun_Reactivities_top_87_percent_constrained.DBN	0.821861	0.959256	0.821861	0.959256	0.012742
SARS_SF1_100_di_-1.ct	Rouskin_DMS_SARS2_Reactivity_top_88_percent_constrained.DBN	0.421451	0.431011	0.836607	0.971189	0.0131161		SARS_SF1_100_di_-1.ct	Incarnato_SHAPE_SARS2_in_vitro_Reactivity_top_88_percent_constrained.DBN	0.826082	0.920802	0.845453	0.944135	0.0119895		SARS_SF1_100_di_-1.ct	SHAPE_in_vivo_Incar_top_88_percent_constrained.DBN	0.836585	0.935592	0.845597	0.943605	0.0116379		SARS_SF1_100_di_-1.ct	Incar_DMS_invitro_Reactivities_top_88_percent_constrained.DBN	0.420018	0.426622	0.838007	0.968588	0.0129344		SARS_SF1_100_di_-1.ct	Pyle_SHAPE_SARS2_Reactivity_top_88_percent_constrained.DBN	0.84194	0.945324	0.844462	0.945685	0.0116227		SARS_SF1_100_di_-1.ct	Sun_Reactivities_top_88_percent_constrained.DBN	0.835762	0.962023	0.835762	0.962023	0.0133731
SARS_SF1_100_di_-1.ct	Rouskin_DMS_SARS2_Reactivity_top_89_percent_constrained.DBN	0.4281	0.432443	0.849806	0.974414	0.0128606		SARS_SF1_100_di_-1.ct	Incarnato_SHAPE_SARS2_in_vitro_Reactivity_top_89_percent_constrained.DBN	0.838336	0.925954	0.857993	0.949418	0.0119065		SARS_SF1_100_di_-1.ct	SHAPE_in_vivo_Incar_top_89_percent_constrained.DBN	0.848736	0.941317	0.857879	0.949379	0.0116597		SARS_SF1_100_di_-1.ct	Incar_DMS_invitro_Reactivities_top_89_percent_constrained.DBN	0.426711	0.427863	0.851361	0.971404	0.012972		SARS_SF1_100_di_-1.ct	Pyle_SHAPE_SARS2_Reactivity_top_89_percent_constrained.DBN	0.854193	0.95105	0.856752	0.951413	0.0116931		SARS_SF1_100_di_-1.ct	Sun_Reactivities_top_89_percent_constrained.DBN	0.849611	0.964885	0.849611	0.964885	0.0133632
SARS_SF1_100_di_-1.ct	Rouskin_DMS_SARS2_Reactivity_top_90_percent_constrained.DBN	0.43511	0.433206	0.86372	0.976134	0.0135824		SARS_SF1_100_di_-1.ct	Incarnato_SHAPE_SARS2_in_vitro_Reactivity_top_90_percent_constrained.DBN	0.85095	0.930439	0.870903	0.954016	0.012316		SARS_SF1_100_di_-1.ct	SHAPE_in_vivo_Incar_top_90_percent_constrained.DBN	0.86171	0.945515	0.870993	0.953614	0.0125058		SARS_SF1_100_di_-1.ct	Incar_DMS_invitro_Reactivities_top_90_percent_constrained.DBN	0.433301	0.429389	0.86451	0.97487	0.012818		SARS_SF1_100_di_-1.ct	Pyle_SHAPE_SARS2_Reactivity_top_90_percent_constrained.DBN	0.866653	0.956489	0.869249	0.956854	0.0119576		SARS_SF1_100_di_-1.ct	Sun_Reactivities_top_90_percent_constrained.DBN	0.862997	0.968607	0.862997	0.968607	0.012966
SARS_SF1_100_di_-1.ct	Rouskin_DMS_SARS2_Reactivity_top_91_percent_constrained.DBN	0.442016	0.434256	0.87743	0.978499	0.0134151		SARS_SF1_100_di_-1.ct	Incarnato_SHAPE_SARS2_in_vitro_Reactivity_top_91_percent_constrained.DBN	0.863049	0.935878	0.883286	0.959593	0.0118824		SARS_SF1_100_di_-1.ct	SHAPE_in_vivo_Incar_top_91_percent_constrained.DBN	0.873552	0.951813	0.882962	0.959965	0.01149		SARS_SF1_100_di_-1.ct	Incar_DMS_invitro_Reactivities_top_91_percent_constrained.DBN	0.440045	0.430534	0.877966	0.97747	0.0131534		SARS_SF1_100_di_-1.ct	Pyle_SHAPE_SARS2_Reactivity_top_91_percent_constrained.DBN	0.878752	0.9625	0.881384	0.962868	0.0116847		SARS_SF1_100_di_-1.ct	Sun_Reactivities_top_91_percent_constrained.DBN	0.876435	0.972233	0.876435	0.972233	0.0130646
SARS_SF1_100_di_-1.ct	Rouskin_DMS_SARS2_Reactivity_top_92_percent_constrained.DBN	0.448562	0.435878	0.890424	0.982154	0.0127618		SARS_SF1_100_di_-1.ct	Incarnato_SHAPE_SARS2_in_vitro_Reactivity_top_92_percent_constrained.DBN	0.874839	0.941889	0.895353	0.965757	0.0116534		SARS_SF1_100_di_-1.ct	SHAPE_in_vivo_Incar_top_92_percent_constrained.DBN	0.886217	0.956584	0.895764	0.964777	0.0123509		SARS_SF1_100_di_-1.ct	Incar_DMS_invitro_Reactivities_top_92_percent_constrained.DBN	0.446841	0.431679	0.891525	0.980069	0.0132891		SARS_SF1_100_di_-1.ct	Pyle_SHAPE_SARS2_Reactivity_top_92_percent_constrained.DBN	0.891726	0.966985	0.894397	0.967354	0.0125883		SARS_SF1_100_di_-1.ct	Sun_Reactivities_top_92_percent_constrained.DBN	0.89013	0.975382	0.89013	0.975382	0.013358
SARS_SF1_100_di_-1.ct	Rouskin_DMS_SARS2_Reactivity_top_93_percent_constrained.DBN	0.455056	0.437595	0.903315	0.986025	0.0127112		SARS_SF1_100_di_-1.ct	Incarnato_SHAPE_SARS2_in_vitro_Reactivity_top_93_percent_constrained.DBN	0.887196	0.946851	0.907999	0.970844	0.0122775		SARS_SF1_100_di_-1.ct	SHAPE_in_vivo_Incar_top_93_percent_constrained.DBN	0.898522	0.962118	0.908201	0.970359	0.0120689		SARS_SF1_100_di_-1.ct	Incar_DMS_invitro_Reactivities_top_93_percent_constrained.DBN	0.453689	0.432634	0.905187	0.982236	0.0134193		SARS_SF1_100_di_-1.ct	Pyle_SHAPE_SARS2_Reactivity_top_93_percent_constrained.DBN	0.90537	0.970134	0.908082	0.970504	0.0132808		SARS_SF1_100_di_-1.ct	Sun_Reactivities_top_93_percent_constrained.DBN	0.903619	0.978912	0.903619	0.978912	0.0132047
SARS_SF1_100_di_-1.ct	Rouskin_DMS_SARS2_Reactivity_top_94_percent_constrained.DBN	0.462066	0.438454	0.917229	0.98796	0.0137469		SARS_SF1_100_di_-1.ct	Incarnato_SHAPE_SARS2_in_vitro_Reactivity_top_94_percent_constrained.DBN	0.899501	0.951908	0.920592	0.97603	0.0122917		SARS_SF1_100_di_-1.ct	SHAPE_in_vivo_Incar_top_94_percent_constrained.DBN	0.911033	0.967176	0.920847	0.97546	0.0123354		SARS_SF1_100_di_-1.ct	Incar_DMS_invitro_Reactivities_top_94_percent_constrained.DBN	0.460485	0.433779	0.918747	0.984835	0.0133537		SARS_SF1_100_di_-1.ct	Pyle_SHAPE_SARS2_Reactivity_top_94_percent_constrained.DBN	0.918241	0.974809	0.920991	0.975181	0.0125895		SARS_SF1_100_di_-1.ct	Sun_Reactivities_top_94_percent_constrained.DBN	0.917057	0.982538	0.917057	0.982538	0.013203
SARS_SF1_100_di_-1.ct	Rouskin_DMS_SARS2_Reactivity_top_95_percent_constrained.DBN	0.469178	0.439027	0.931348	0.98925	0.0139673		SARS_SF1_100_di_-1.ct	Incarnato_SHAPE_SARS2_in_vitro_Reactivity_top_95_percent_constrained.DBN	0.912166	0.956298	0.933555	0.98053	0.01271		SARS_SF1_100_di_-1.ct	SHAPE_in_vivo_Incar_top_95_percent_constrained.DBN	0.923647	0.972042	0.933597	0.980368	0.0124995		SARS_SF1_100_di_-1.ct	Incar_DMS_invitro_Reactivities_top_95_percent_constrained.DBN	0.467127	0.435115	0.931998	0.987868	0.0130904		SARS_SF1_100_di_-1.ct	Pyle_SHAPE_SARS2_Reactivity_top_95_percent_constrained.DBN	0.930907	0.979771	0.933695	0.980145	0.0124511		SARS_SF1_100_di_-1.ct	Sun_Reactivities_top_95_percent_constrained.DBN	0.930907	0.985401	0.930907	0.985401	0.0136474
SARS_SF1_100_di_-1.ct	Rouskin_DMS_SARS2_Reactivity_top_96_percent_constrained.DBN	0.476085	0.439981	0.945058	0.9914	0.0135919		SARS_SF1_100_di_-1.ct	Incarnato_SHAPE_SARS2_in_vitro_Reactivity_top_96_percent_constrained.DBN	0.925089	0.96021	0.94678	0.984542	0.0130214		SARS_SF1_100_di_-1.ct	SHAPE_in_vivo_Incar_top_96_percent_constrained.DBN	0.936467	0.976527	0.946555	0.984891	0.0127622		SARS_SF1_100_di_-1.ct	Incar_DMS_invitro_Reactivities_top_96_percent_constrained.DBN	0.474129	0.435878	0.945968	0.989601	0.0138249		SARS_SF1_100_di_-1.ct	Pyle_SHAPE_SARS2_Reactivity_top_96_percent_constrained.DBN	0.943727	0.984447	0.946553	0.984822	0.0126631		SARS_SF1_100_di_-1.ct	Sun_Reactivities_top_96_percent_constrained.DBN	0.944705	0.988359	0.944705	0.988359	0.0136374
SARS_SF1_100_di_-1.ct	Rouskin_DMS_SARS2_Reactivity_top_97_percent_constrained.DBN	0.483043	0.44084	0.95887	0.993335	0.0137201		SARS_SF1_100_di_-1.ct	Incarnato_SHAPE_SARS2_in_vitro_Reactivity_top_97_percent_constrained.DBN	0.938526	0.963168	0.960533	0.987575	0.0135819		SARS_SF1_100_di_-1.ct	SHAPE_in_vivo_Incar_top_97_percent_constrained.DBN	0.948875	0.981775	0.959097	0.990184	0.0124185		SARS_SF1_100_di_-1.ct	Incar_DMS_invitro_Reactivities_top_97_percent_constrained.DBN	0.480822	0.437118	0.959322	0.992418	0.0132526		SARS_SF1_100_di_-1.ct	Pyle_SHAPE_SARS2_Reactivity_top_97_percent_constrained.DBN	0.956958	0.988454	0.959824	0.988832	0.0131231		SARS_SF1_100_di_-1.ct	Sun_Reactivities_top_97_percent_constrained.DBN	0.958657	0.991031	0.958657	0.991031	0.0138274
SARS_SF1_100_di_-1.ct	Rouskin_DMS_SARS2_Reactivity_top_98_percent_constrained.DBN	0.489692	0.442271	0.972069	0.99656	0.0131529		SARS_SF1_100_di_-1.ct	Incarnato_SHAPE_SARS2_in_vitro_Reactivity_top_98_percent_constrained.DBN	0.950986	0.967939	0.973285	0.992466	0.0126555		SARS_SF1_100_di_-1.ct	SHAPE_in_vivo_Incar_top_98_percent_constrained.DBN	0.961952	0.985782	0.972315	0.994226	0.0131418		SARS_SF1_100_di_-1.ct	Incar_DMS_invitro_Reactivities_top_98_percent_constrained.DBN	0.487875	0.437786	0.973395	0.993934	0.0139876		SARS_SF1_100_di_-1.ct	Pyle_SHAPE_SARS2_Reactivity_top_98_percent_constrained.DBN	0.970344	0.99208	0.973251	0.992459	0.013325		SARS_SF1_100_di_-1.ct	Sun_Reactivities_top_98_percent_constrained.DBN	0.972558	0.993798	0.972558	0.993798	0.0138148
SARS_SF1_100_di_-1.ct	Rouskin_DMS_SARS2_Reactivity_top_99_percent_constrained.DBN	0.496959	0.442653	0.986495	0.99742	0.0143888		SARS_SF1_100_di_-1.ct	Incarnato_SHAPE_SARS2_in_vitro_Reactivity_top_99_percent_constrained.DBN	0.9636	0.972424	0.986195	0.997065	0.0128718		SARS_SF1_100_di_-1.ct	SHAPE_in_vivo_Incar_top_99_percent_constrained.DBN	0.975647	0.988645	0.986157	0.997113	0.0138027		SARS_SF1_100_di_-1.ct	Incar_DMS_invitro_Reactivities_top_99_percent_constrained.DBN	0.494568	0.439027	0.986749	0.99675	0.0133105		SARS_SF1_100_di_-1.ct	Pyle_SHAPE_SARS2_Reactivity_top_99_percent_constrained.DBN	0.98337	0.996469	0.986316	0.99685	0.0130237		SARS_SF1_100_di_-1.ct	Sun_Reactivities_top_99_percent_constrained.DBN	0.986253	0.996947	0.986253	0.996947	0.0136533
SARS_SF1_100_di_-1.ct	Rouskin_DMS_SARS2_Reactivity_top_100_percent_constrained.DBN	0.503762	0.443798	1	1	0.0135052		SARS_SF1_100_di_-1.ct	Incarnato_SHAPE_SARS2_in_vitro_Reactivity_top_100_percent_constrained.DBN	0.977089	0.975286	1	1	0.0138055		SARS_SF1_100_di_-1.ct	SHAPE_in_vivo_Incar_top_100_percent_constrained.DBN	0.989343	0.991508	1	1	0.0138426		SARS_SF1_100_di_-1.ct	Incar_DMS_invitro_Reactivities_top_100_percent_constrained.DBN	0.50121	0.440458	1	1	0.0132512		SARS_SF1_100_di_-1.ct	Pyle_SHAPE_SARS2_Reactivity_top_100_percent_constrained.DBN	0.997014	0.999618	1	1	0.0136845		SARS_SF1_100_di_-1.ct	Sun_Reactivities_top_100_percent_constrained.DBN	1	1	1	1	0.0137466
					Sum	0.758742							Sum	0.676619							Sum	0.660084							Sum	0.721903							Sum	0.621654							Sum	0.72513

## Sheet: SF1 10000Rnd Di Results
Rouskins
				fpr norm	tpf norm	AUC
SARS_SF1_10000_di_-1.ct	Rouskin_DMS_SARS2_Reactivity_top_0_percent_constrained.DBN	0	0	0	0
SARS_SF1_10000_di_-1.ct	Rouskin_DMS_SARS2_Reactivity_top_1_percent_constrained.DBN	0.00370561	0.00688863	0.00735895	0.0155139	0.000114166
SARS_SF1_10000_di_-1.ct	Rouskin_DMS_SARS2_Reactivity_top_2_percent_constrained.DBN	0.00586722	0.0166475	0.0116517	0.0374919	0.000160942
SARS_SF1_10000_di_-1.ct	Rouskin_DMS_SARS2_Reactivity_top_3_percent_constrained.DBN	0.00849202	0.025641	0.0168643	0.0577462	0.000301007
SARS_SF1_10000_di_-1.ct	Rouskin_DMS_SARS2_Reactivity_top_4_percent_constrained.DBN	0.0108595	0.0350172	0.0215658	0.0788623	0.000370775
SARS_SF1_10000_di_-1.ct	Rouskin_DMS_SARS2_Reactivity_top_5_percent_constrained.DBN	0.013227	0.0443934	0.0262674	0.0999785	0.000470054
SARS_SF1_10000_di_-1.ct	Rouskin_DMS_SARS2_Reactivity_top_6_percent_constrained.DBN	0.0161606	0.0528129	0.0320932	0.11894	0.000692925
SARS_SF1_10000_di_-1.ct	Rouskin_DMS_SARS2_Reactivity_top_7_percent_constrained.DBN	0.018528	0.0621891	0.0367948	0.140056	0.000658481
SARS_SF1_10000_di_-1.ct	Rouskin_DMS_SARS2_Reactivity_top_8_percent_constrained.DBN	0.0213073	0.0707998	0.042314	0.159448	0.00088003
SARS_SF1_10000_di_-1.ct	Rouskin_DMS_SARS2_Reactivity_top_9_percent_constrained.DBN	0.0242923	0.0790279	0.048242	0.177979	0.00105507
SARS_SF1_10000_di_-1.ct	Rouskin_DMS_SARS2_Reactivity_top_10_percent_constrained.DBN	0.0273289	0.0871604	0.0542723	0.196294	0.0011837
SARS_SF1_10000_di_-1.ct	Rouskin_DMS_SARS2_Reactivity_top_11_percent_constrained.DBN	0.0304169	0.0952928	0.0604047	0.214609	0.00131608
SARS_SF1_10000_di_-1.ct	Rouskin_DMS_SARS2_Reactivity_top_12_percent_constrained.DBN	0.033299	0.103712	0.0661284	0.23357	0.00133687
SARS_SF1_10000_di_-1.ct	Rouskin_DMS_SARS2_Reactivity_top_13_percent_constrained.DBN	0.036387	0.111749	0.0722608	0.25167	0.00154336
SARS_SF1_10000_di_-1.ct	Rouskin_DMS_SARS2_Reactivity_top_14_percent_constrained.DBN	0.0397838	0.119307	0.0790065	0.268692	0.00181252
SARS_SF1_10000_di_-1.ct	Rouskin_DMS_SARS2_Reactivity_top_15_percent_constrained.DBN	0.0431292	0.126866	0.08565	0.285714	0.00189814
SARS_SF1_10000_di_-1.ct	Rouskin_DMS_SARS2_Reactivity_top_16_percent_constrained.DBN	0.0462687	0.134807	0.0918847	0.303598	0.00189284
SARS_SF1_10000_di_-1.ct	Rouskin_DMS_SARS2_Reactivity_top_17_percent_constrained.DBN	0.0490479	0.143418	0.0974039	0.322991	0.00178266
SARS_SF1_10000_di_-1.ct	Rouskin_DMS_SARS2_Reactivity_top_18_percent_constrained.DBN	0.0527535	0.150306	0.104763	0.338505	0.00249104
SARS_SF1_10000_di_-1.ct	Rouskin_DMS_SARS2_Reactivity_top_19_percent_constrained.DBN	0.0561503	0.157865	0.111509	0.355527	0.00239828
SARS_SF1_10000_di_-1.ct	Rouskin_DMS_SARS2_Reactivity_top_20_percent_constrained.DBN	0.0594956	0.165423	0.118152	0.372549	0.00247503
SARS_SF1_10000_di_-1.ct	Rouskin_DMS_SARS2_Reactivity_top_21_percent_constrained.DBN	0.0625836	0.17346	0.124285	0.390649	0.00239564
SARS_SF1_10000_di_-1.ct	Rouskin_DMS_SARS2_Reactivity_top_22_percent_constrained.DBN	0.0660834	0.180827	0.131235	0.40724	0.00283037
SARS_SF1_10000_di_-1.ct	Rouskin_DMS_SARS2_Reactivity_top_23_percent_constrained.DBN	0.0696861	0.187907	0.138389	0.423185	0.00302769
SARS_SF1_10000_di_-1.ct	Rouskin_DMS_SARS2_Reactivity_top_24_percent_constrained.DBN	0.0734431	0.1947	0.14585	0.438483	0.00327159
SARS_SF1_10000_di_-1.ct	Rouskin_DMS_SARS2_Reactivity_top_25_percent_constrained.DBN	0.0770458	0.20178	0.153005	0.454428	0.00325122
SARS_SF1_10000_di_-1.ct	Rouskin_DMS_SARS2_Reactivity_top_26_percent_constrained.DBN	0.0803397	0.209434	0.159546	0.471666	0.0030853
SARS_SF1_10000_di_-1.ct	Rouskin_DMS_SARS2_Reactivity_top_27_percent_constrained.DBN	0.0838394	0.216801	0.166496	0.488257	0.00339344
SARS_SF1_10000_di_-1.ct	Rouskin_DMS_SARS2_Reactivity_top_28_percent_constrained.DBN	0.0878538	0.223115	0.174469	0.502478	0.00400585
SARS_SF1_10000_di_-1.ct	Rouskin_DMS_SARS2_Reactivity_top_29_percent_constrained.DBN	0.0917653	0.229621	0.182236	0.51713	0.00401695
SARS_SF1_10000_di_-1.ct	Rouskin_DMS_SARS2_Reactivity_top_30_percent_constrained.DBN	0.0955224	0.23651	0.189697	0.532644	0.00397414
SARS_SF1_10000_di_-1.ct	Rouskin_DMS_SARS2_Reactivity_top_31_percent_constrained.DBN	0.0993309	0.243207	0.197261	0.547727	0.00414266
SARS_SF1_10000_di_-1.ct	Rouskin_DMS_SARS2_Reactivity_top_32_percent_constrained.DBN	0.102831	0.250478	0.204211	0.564103	0.00392058
SARS_SF1_10000_di_-1.ct	Rouskin_DMS_SARS2_Reactivity_top_33_percent_constrained.DBN	0.107051	0.25641	0.212592	0.577462	0.00483972
SARS_SF1_10000_di_-1.ct	Rouskin_DMS_SARS2_Reactivity_top_34_percent_constrained.DBN	0.111065	0.262725	0.220564	0.591683	0.00471701
SARS_SF1_10000_di_-1.ct	Rouskin_DMS_SARS2_Reactivity_top_35_percent_constrained.DBN	0.11544	0.268465	0.229252	0.604611	0.00525265
SARS_SF1_10000_di_-1.ct	Rouskin_DMS_SARS2_Reactivity_top_36_percent_constrained.DBN	0.119815	0.27411	0.237939	0.617324	0.0053631
SARS_SF1_10000_di_-1.ct	Rouskin_DMS_SARS2_Reactivity_top_37_percent_constrained.DBN	0.124086	0.279946	0.246423	0.630468	0.00534841
SARS_SF1_10000_di_-1.ct	Rouskin_DMS_SARS2_Reactivity_top_38_percent_constrained.DBN	0.128564	0.285496	0.255315	0.642965	0.00571729
SARS_SF1_10000_di_-1.ct	Rouskin_DMS_SARS2_Reactivity_top_39_percent_constrained.DBN	0.133453	0.290184	0.265025	0.653523	0.00634553
SARS_SF1_10000_di_-1.ct	Rouskin_DMS_SARS2_Reactivity_top_40_percent_constrained.DBN	0.138755	0.294106	0.275552	0.662357	0.00697289
SARS_SF1_10000_di_-1.ct	Rouskin_DMS_SARS2_Reactivity_top_41_percent_constrained.DBN	0.143438	0.299177	0.284853	0.673777	0.00626673
SARS_SF1_10000_di_-1.ct	Rouskin_DMS_SARS2_Reactivity_top_42_percent_constrained.DBN	0.148121	0.304248	0.294154	0.685197	0.00637295
SARS_SF1_10000_di_-1.ct	Rouskin_DMS_SARS2_Reactivity_top_43_percent_constrained.DBN	0.152959	0.309127	0.303761	0.696186	0.00668862
SARS_SF1_10000_di_-1.ct	Rouskin_DMS_SARS2_Reactivity_top_44_percent_constrained.DBN	0.1579	0.31372	0.313573	0.706529	0.00693242
SARS_SF1_10000_di_-1.ct	Rouskin_DMS_SARS2_Reactivity_top_45_percent_constrained.DBN	0.162892	0.318217	0.323487	0.716656	0.00710503
SARS_SF1_10000_di_-1.ct	Rouskin_DMS_SARS2_Reactivity_top_46_percent_constrained.DBN	0.168296	0.322044	0.334219	0.725275	0.00778351
SARS_SF1_10000_di_-1.ct	Rouskin_DMS_SARS2_Reactivity_top_47_percent_constrained.DBN	0.172928	0.32721	0.343418	0.73691	0.00677861
SARS_SF1_10000_di_-1.ct	Rouskin_DMS_SARS2_Reactivity_top_48_percent_constrained.DBN	0.178127	0.331324	0.353741	0.746175	0.00770275
SARS_SF1_10000_di_-1.ct	Rouskin_DMS_SARS2_Reactivity_top_49_percent_constrained.DBN	0.183273	0.335534	0.363962	0.755656	0.00772339
SARS_SF1_10000_di_-1.ct	Rouskin_DMS_SARS2_Reactivity_top_50_percent_constrained.DBN	0.18878	0.339074	0.374898	0.763629	0.00835121
SARS_SF1_10000_di_-1.ct	Rouskin_DMS_SARS2_Reactivity_top_51_percent_constrained.DBN	0.193875	0.343475	0.385016	0.77354	0.00782711
SARS_SF1_10000_di_-1.ct	Rouskin_DMS_SARS2_Reactivity_top_52_percent_constrained.DBN	0.198868	0.347972	0.39493	0.783667	0.00776939
SARS_SF1_10000_di_-1.ct	Rouskin_DMS_SARS2_Reactivity_top_53_percent_constrained.DBN	0.203757	0.35266	0.40464	0.794225	0.00771171
SARS_SF1_10000_di_-1.ct	Rouskin_DMS_SARS2_Reactivity_top_54_percent_constrained.DBN	0.209213	0.356391	0.415474	0.802629	0.00869569
SARS_SF1_10000_di_-1.ct	Rouskin_DMS_SARS2_Reactivity_top_55_percent_constrained.DBN	0.214874	0.359644	0.426717	0.809955	0.0091062
SARS_SF1_10000_di_-1.ct	Rouskin_DMS_SARS2_Reactivity_top_56_percent_constrained.DBN	0.220072	0.363758	0.43704	0.81922	0.00845679
SARS_SF1_10000_di_-1.ct	Rouskin_DMS_SARS2_Reactivity_top_57_percent_constrained.DBN	0.226402	0.365767	0.449612	0.823745	0.0103557
SARS_SF1_10000_di_-1.ct	Rouskin_DMS_SARS2_Reactivity_top_58_percent_constrained.DBN	0.232012	0.369116	0.460752	0.831286	0.00926106
SARS_SF1_10000_di_-1.ct	Rouskin_DMS_SARS2_Reactivity_top_59_percent_constrained.DBN	0.237622	0.37256	0.471893	0.839043	0.00934748
SARS_SF1_10000_di_-1.ct	Rouskin_DMS_SARS2_Reactivity_top_60_percent_constrained.DBN	0.243078	0.376196	0.482727	0.847231	0.00917892
SARS_SF1_10000_di_-1.ct	Rouskin_DMS_SARS2_Reactivity_top_61_percent_constrained.DBN	0.248945	0.379066	0.494379	0.853695	0.00994698
SARS_SF1_10000_di_-1.ct	Rouskin_DMS_SARS2_Reactivity_top_62_percent_constrained.DBN	0.254195	0.38318	0.504804	0.862961	0.00899652
SARS_SF1_10000_di_-1.ct	Rouskin_DMS_SARS2_Reactivity_top_63_percent_constrained.DBN	0.26001	0.386146	0.516353	0.86964	0.0100439
SARS_SF1_10000_di_-1.ct	Rouskin_DMS_SARS2_Reactivity_top_64_percent_constrained.DBN	0.266341	0.388155	0.528925	0.874165	0.0109896
SARS_SF1_10000_di_-1.ct	Rouskin_DMS_SARS2_Reactivity_top_65_percent_constrained.DBN	0.272568	0.390356	0.541292	0.879121	0.0108722
SARS_SF1_10000_di_-1.ct	Rouskin_DMS_SARS2_Reactivity_top_66_percent_constrained.DBN	0.278693	0.392748	0.553455	0.884508	0.010758
SARS_SF1_10000_di_-1.ct	Rouskin_DMS_SARS2_Reactivity_top_67_percent_constrained.DBN	0.28492	0.395044	0.565822	0.889679	0.0110028
SARS_SF1_10000_di_-1.ct	Rouskin_DMS_SARS2_Reactivity_top_68_percent_constrained.DBN	0.291148	0.397245	0.578189	0.894635	0.0110641
SARS_SF1_10000_di_-1.ct	Rouskin_DMS_SARS2_Reactivity_top_69_percent_constrained.DBN	0.296963	0.40021	0.589738	0.901314	0.0104097
SARS_SF1_10000_di_-1.ct	Rouskin_DMS_SARS2_Reactivity_top_70_percent_constrained.DBN	0.303242	0.402411	0.602208	0.90627	0.0113006
SARS_SF1_10000_di_-1.ct	Rouskin_DMS_SARS2_Reactivity_top_71_percent_constrained.DBN	0.309521	0.404516	0.614677	0.911011	0.0113597
SARS_SF1_10000_di_-1.ct	Rouskin_DMS_SARS2_Reactivity_top_72_percent_constrained.DBN	0.316006	0.406238	0.627555	0.914889	0.0117821
SARS_SF1_10000_di_-1.ct	Rouskin_DMS_SARS2_Reactivity_top_73_percent_constrained.DBN	0.322131	0.40863	0.639718	0.920276	0.0111931
SARS_SF1_10000_di_-1.ct	Rouskin_DMS_SARS2_Reactivity_top_74_percent_constrained.DBN	0.328307	0.410926	0.651983	0.925447	0.0113505
SARS_SF1_10000_di_-1.ct	Rouskin_DMS_SARS2_Reactivity_top_75_percent_constrained.DBN	0.334997	0.412361	0.66527	0.928679	0.0123394
SARS_SF1_10000_di_-1.ct	Rouskin_DMS_SARS2_Reactivity_top_76_percent_constrained.DBN	0.341173	0.414657	0.677535	0.93385	0.0114536
SARS_SF1_10000_di_-1.ct	Rouskin_DMS_SARS2_Reactivity_top_77_percent_constrained.DBN	0.347761	0.416188	0.690617	0.937298	0.0122623
SARS_SF1_10000_di_-1.ct	Rouskin_DMS_SARS2_Reactivity_top_78_percent_constrained.DBN	0.354297	0.41791	0.703598	0.941176	0.0122168
SARS_SF1_10000_di_-1.ct	Rouskin_DMS_SARS2_Reactivity_top_79_percent_constrained.DBN	0.360937	0.419346	0.716783	0.944409	0.0124518
SARS_SF1_10000_di_-1.ct	Rouskin_DMS_SARS2_Reactivity_top_80_percent_constrained.DBN	0.367473	0.420972	0.729763	0.948072	0.0123063
SARS_SF1_10000_di_-1.ct	Rouskin_DMS_SARS2_Reactivity_top_81_percent_constrained.DBN	0.374318	0.422024	0.743357	0.950442	0.0129199
SARS_SF1_10000_di_-1.ct	Rouskin_DMS_SARS2_Reactivity_top_82_percent_constrained.DBN	0.380854	0.423651	0.756337	0.954105	0.0123846
SARS_SF1_10000_di_-1.ct	Rouskin_DMS_SARS2_Reactivity_top_83_percent_constrained.DBN	0.387288	0.425564	0.769113	0.958414	0.0122447
SARS_SF1_10000_di_-1.ct	Rouskin_DMS_SARS2_Reactivity_top_84_percent_constrained.DBN	0.39403	0.426808	0.782502	0.961215	0.0128699
SARS_SF1_10000_di_-1.ct	Rouskin_DMS_SARS2_Reactivity_top_85_percent_constrained.DBN	0.400926	0.427765	0.796198	0.96337	0.0131942
SARS_SF1_10000_di_-1.ct	Rouskin_DMS_SARS2_Reactivity_top_86_percent_constrained.DBN	0.407771	0.428913	0.809791	0.965956	0.0131308
SARS_SF1_10000_di_-1.ct	Rouskin_DMS_SARS2_Reactivity_top_87_percent_constrained.DBN	0.414565	0.430061	0.823283	0.968541	0.013067
SARS_SF1_10000_di_-1.ct	Rouskin_DMS_SARS2_Reactivity_top_88_percent_constrained.DBN	0.421359	0.431209	0.836774	0.971127	0.0131019
SARS_SF1_10000_di_-1.ct	Rouskin_DMS_SARS2_Reactivity_top_89_percent_constrained.DBN	0.427998	0.432644	0.849959	0.974359	0.0128467
SARS_SF1_10000_di_-1.ct	Rouskin_DMS_SARS2_Reactivity_top_90_percent_constrained.DBN	0.434997	0.43341	0.863859	0.976083	0.0135678
SARS_SF1_10000_di_-1.ct	Rouskin_DMS_SARS2_Reactivity_top_91_percent_constrained.DBN	0.441894	0.434462	0.877555	0.978453	0.0134007
SARS_SF1_10000_di_-1.ct	Rouskin_DMS_SARS2_Reactivity_top_92_percent_constrained.DBN	0.44843	0.436089	0.890536	0.982116	0.0127482
SARS_SF1_10000_di_-1.ct	Rouskin_DMS_SARS2_Reactivity_top_93_percent_constrained.DBN	0.454915	0.437811	0.903414	0.985994	0.0126978
SARS_SF1_10000_di_-1.ct	Rouskin_DMS_SARS2_Reactivity_top_94_percent_constrained.DBN	0.461915	0.438672	0.917314	0.987934	0.0137325
SARS_SF1_10000_di_-1.ct	Rouskin_DMS_SARS2_Reactivity_top_95_percent_constrained.DBN	0.469017	0.439246	0.931419	0.989226	0.0139527
SARS_SF1_10000_di_-1.ct	Rouskin_DMS_SARS2_Reactivity_top_96_percent_constrained.DBN	0.475914	0.440203	0.945114	0.991381	0.0135778
SARS_SF1_10000_di_-1.ct	Rouskin_DMS_SARS2_Reactivity_top_97_percent_constrained.DBN	0.482862	0.441064	0.958913	0.99332	0.0137059
SARS_SF1_10000_di_-1.ct	Rouskin_DMS_SARS2_Reactivity_top_98_percent_constrained.DBN	0.489501	0.442499	0.972097	0.996552	0.0131393
SARS_SF1_10000_di_-1.ct	Rouskin_DMS_SARS2_Reactivity_top_99_percent_constrained.DBN	0.496758	0.442882	0.986509	0.997414	0.014374
SARS_SF1_10000_di_-1.ct	Rouskin_DMS_SARS2_Reactivity_top_100_percent_constrained.DBN	0.503551	0.44403	1	1	0.0134914
					Sum	0.758369

## Sheet: SF2 Mono Results
Rouskins								Incarnato SHAPE in vitro								Incarnato SHAPE in vivo								Incarnato DMS in vitro								Pyle SHAPE								Sun SHAPE
		fpr	tpr	fpr norm	tpf norm	AUC				fpr	tpr	fpr norm	tpf norm	AUC				fpr	tpr	fpr norm	tpf norm	AUC				fpr	tpr	fpr norm	tpf norm	AUC				fpr	tpr	fpr norm	tpf norm	AUC				fpr	tpr	fpr norm	tpf norm	AUC
SARS_SF2_Mono_-1.ct	Rouskin_DMS_SARS2_Reactivity_top_0_percent_constrained.DBN	0	0	0	0			SARS_SF2_Mono_-1.ct	Incarnato_SHAPE_SARS2_in_vitro_Reactivity_top_0_percent_constrained.DBN	0	0	0	0			SARS_SF2_Mono_-1.ct	SHAPE_in_vivo_Incar_top_0_percent_constrained.DBN	0	0	0	0			SARS_SF2_Mono_-1.ct	Incar_DMS_invitro_Reactivities_top_0_percent_constrained.DBN	0	0	0	0			SARS_SF2_Mono_-1.ct	Pyle_SHAPE_SARS2_Reactivity_top_0_percent_constrained.DBN	0	0	0	0			SARS_SF2_Mono_-1.ct	Sun_Reactivities_top_0_percent_constrained.DBN	0	0	0	0
SARS_SF2_Mono_-1.ct	Rouskin_DMS_SARS2_Reactivity_top_1_percent_constrained.DBN	0.00371594	0.00626547	0.00723888	0.0141559	0.000102473		SARS_SF2_Mono_-1.ct	Incarnato_SHAPE_SARS2_in_vitro_Reactivity_top_1_percent_constrained.DBN	0.00659794	0.0139233	0.00675716	0.0142586	9.63474e-05		SARS_SF2_Mono_-1.ct	SHAPE_in_vivo_Incar_top_1_percent_constrained.DBN	0.00512518	0.0161665	0.0051832	0.0163001	8.44867e-05		SARS_SF2_Mono_-1.ct	Incar_DMS_invitro_Reactivities_top_1_percent_constrained.DBN	0.00512518	0.00440903	0.0100404	0.0100246	0.000100651		SARS_SF2_Mono_-1.ct	Pyle_SHAPE_SARS2_Reactivity_top_1_percent_constrained.DBN	0.00877761	0.0115254	0.00880667	0.0115307	0.000101547		SARS_SF2_Mono_-1.ct	Sun_Reactivities_top_1_percent_constrained.DBN	0.00589102	0.0153929	0.00589102	0.0153929	9.06801e-05
SARS_SF2_Mono_-1.ct	Rouskin_DMS_SARS2_Reactivity_top_2_percent_constrained.DBN	0.00519052	0.0154703	0.0101115	0.0349528	0.000100404		SARS_SF2_Mono_-1.ct	Incarnato_SHAPE_SARS2_in_vitro_Reactivity_top_2_percent_constrained.DBN	0.0102504	0.0317141	0.0104977	0.0324778	0.000121486		SARS_SF2_Mono_-1.ct	SHAPE_in_vivo_Incar_top_2_percent_constrained.DBN	0.0120177	0.0300124	0.0121537	0.0302605	0.000210931		SARS_SF2_Mono_-1.ct	Incar_DMS_invitro_Reactivities_top_2_percent_constrained.DBN	0.0100147	0.00905012	0.0196192	0.0205769	0.000197101		SARS_SF2_Mono_-1.ct	Pyle_SHAPE_SARS2_Reactivity_top_2_percent_constrained.DBN	0.0165538	0.0244431	0.0166085	0.0244544	0.00019079		SARS_SF2_Mono_-1.ct	Sun_Reactivities_top_2_percent_constrained.DBN	0.0092489	0.034112	0.0092489	0.034112	0.000114544
SARS_SF2_Mono_-1.ct	Rouskin_DMS_SARS2_Reactivity_top_3_percent_constrained.DBN	0.00772679	0.0233601	0.0150523	0.0527787	0.000260771		SARS_SF2_Mono_-1.ct	Incarnato_SHAPE_SARS2_in_vitro_Reactivity_top_3_percent_constrained.DBN	0.015081	0.0479579	0.0154449	0.0491128	0.000242971		SARS_SF2_Mono_-1.ct	SHAPE_in_vivo_Incar_top_3_percent_constrained.DBN	0.0194993	0.0430848	0.01972	0.043441	0.000328686		SARS_SF2_Mono_-1.ct	Incar_DMS_invitro_Reactivities_top_3_percent_constrained.DBN	0.0152577	0.0133045	0.0298904	0.0302497	0.000310701		SARS_SF2_Mono_-1.ct	Pyle_SHAPE_SARS2_Reactivity_top_3_percent_constrained.DBN	0.0237408	0.0380569	0.0238194	0.0380746	0.000274549		SARS_SF2_Mono_-1.ct	Sun_Reactivities_top_3_percent_constrained.DBN	0.0120766	0.0535272	0.0120766	0.0535272	0.000151358
SARS_SF2_Mono_-1.ct	Rouskin_DMS_SARS2_Reactivity_top_4_percent_constrained.DBN	0.00931933	0.0324103	0.0181547	0.0732261	0.000227175		SARS_SF2_Mono_-1.ct	Incarnato_SHAPE_SARS2_in_vitro_Reactivity_top_4_percent_constrained.DBN	0.0209131	0.0628868	0.0214178	0.0644011	0.000384658		SARS_SF2_Mono_-1.ct	SHAPE_in_vivo_Incar_top_4_percent_constrained.DBN	0.0263918	0.0569307	0.0266905	0.0574013	0.000400117		SARS_SF2_Mono_-1.ct	Incar_DMS_invitro_Reactivities_top_4_percent_constrained.DBN	0.0194404	0.0188738	0.0380842	0.0429124	0.000351619		SARS_SF2_Mono_-1.ct	Pyle_SHAPE_SARS2_Reactivity_top_4_percent_constrained.DBN	0.0318704	0.0505105	0.0319759	0.050534	0.000412181		SARS_SF2_Mono_-1.ct	Sun_Reactivities_top_4_percent_constrained.DBN	0.0156112	0.0720142	0.0156112	0.0720142	0.000254542
SARS_SF2_Mono_-1.ct	Rouskin_DMS_SARS2_Reactivity_top_5_percent_constrained.DBN	0.0108529	0.0415377	0.0211421	0.0938483	0.00028037		SARS_SF2_Mono_-1.ct	Incarnato_SHAPE_SARS2_in_vitro_Reactivity_top_5_percent_constrained.DBN	0.0269219	0.0775835	0.0275716	0.0794518	0.000488934		SARS_SF2_Mono_-1.ct	SHAPE_in_vivo_Incar_top_5_percent_constrained.DBN	0.0339912	0.0698484	0.0343759	0.0704258	0.000541253		SARS_SF2_Mono_-1.ct	Incar_DMS_invitro_Reactivities_top_5_percent_constrained.DBN	0.0227393	0.0256807	0.044547	0.058389	0.000377356		SARS_SF2_Mono_-1.ct	Pyle_SHAPE_SARS2_Reactivity_top_5_percent_constrained.DBN	0.0388807	0.0643564	0.0390094	0.0643863	0.000452862		SARS_SF2_Mono_-1.ct	Sun_Reactivities_top_5_percent_constrained.DBN	0.0202062	0.0891089	0.0202062	0.0891089	0.000409455
SARS_SF2_Mono_-1.ct	Rouskin_DMS_SARS2_Reactivity_top_6_percent_constrained.DBN	0.0130943	0.0498144	0.0255084	0.112548	0.00049142		SARS_SF2_Mono_-1.ct	Incarnato_SHAPE_SARS2_in_vitro_Reactivity_top_6_percent_constrained.DBN	0.0330486	0.0921256	0.0338462	0.0943441	0.000591963		SARS_SF2_Mono_-1.ct	SHAPE_in_vivo_Incar_top_6_percent_constrained.DBN	0.0405891	0.0840811	0.0410486	0.0847762	0.00056568		SARS_SF2_Mono_-1.ct	Incar_DMS_invitro_Reactivities_top_6_percent_constrained.DBN	0.0250957	0.0336479	0.0491633	0.0765037	0.000353162		SARS_SF2_Mono_-1.ct	Pyle_SHAPE_SARS2_Reactivity_top_6_percent_constrained.DBN	0.0465979	0.0772741	0.0467522	0.07731	0.000598594		SARS_SF2_Mono_-1.ct	Sun_Reactivities_top_6_percent_constrained.DBN	0.0268041	0.103574	0.0268041	0.103574	0.000683372
SARS_SF2_Mono_-1.ct	Rouskin_DMS_SARS2_Reactivity_top_7_percent_constrained.DBN	0.0144509	0.0591739	0.0281512	0.133695	0.000353323		SARS_SF2_Mono_-1.ct	Incarnato_SHAPE_SARS2_in_vitro_Reactivity_top_7_percent_constrained.DBN	0.04	0.105585	0.0409653	0.108127	0.000769776		SARS_SF2_Mono_-1.ct	SHAPE_in_vivo_Incar_top_7_percent_constrained.DBN	0.0440648	0.102413	0.0445636	0.10326	0.000362963		SARS_SF2_Mono_-1.ct	Incar_DMS_invitro_Reactivities_top_7_percent_constrained.DBN	0.0279234	0.0410736	0.0547028	0.0933873	0.000517321		SARS_SF2_Mono_-1.ct	Pyle_SHAPE_SARS2_Reactivity_top_7_percent_constrained.DBN	0.0543152	0.0902692	0.0544949	0.0903111	0.000699258		SARS_SF2_Mono_-1.ct	Sun_Reactivities_top_7_percent_constrained.DBN	0.0321649	0.119663	0.0321649	0.119663	0.000641491
SARS_SF2_Mono_-1.ct	Rouskin_DMS_SARS2_Reactivity_top_8_percent_constrained.DBN	0.0166922	0.0673731	0.0325175	0.15222	0.000664638		SARS_SF2_Mono_-1.ct	Incarnato_SHAPE_SARS2_in_vitro_Reactivity_top_8_percent_constrained.DBN	0.0444772	0.122293	0.0455505	0.125238	0.000574242		SARS_SF2_Mono_-1.ct	SHAPE_in_vivo_Incar_top_8_percent_constrained.DBN	0.0512518	0.11595	0.051832	0.116908	0.000849737		SARS_SF2_Mono_-1.ct	Incar_DMS_invitro_Reactivities_top_8_percent_constrained.DBN	0.0298675	0.0495823	0.0585113	0.112733	0.000429335		SARS_SF2_Mono_-1.ct	Pyle_SHAPE_SARS2_Reactivity_top_8_percent_constrained.DBN	0.0633284	0.101485	0.063538	0.101532	0.000918165		SARS_SF2_Mono_-1.ct	Sun_Reactivities_top_8_percent_constrained.DBN	0.0390574	0.133741	0.0390574	0.133741	0.000921806
SARS_SF2_Mono_-1.ct	Rouskin_DMS_SARS2_Reactivity_top_9_percent_constrained.DBN	0.0192875	0.0751083	0.0375733	0.169696	0.000857936		SARS_SF2_Mono_-1.ct	Incarnato_SHAPE_SARS2_in_vitro_Reactivity_top_9_percent_constrained.DBN	0.0486598	0.139387	0.0498341	0.142744	0.000611452		SARS_SF2_Mono_-1.ct	SHAPE_in_vivo_Incar_top_9_percent_constrained.DBN	0.0574374	0.130724	0.0580876	0.131805	0.000824516		SARS_SF2_Mono_-1.ct	Incar_DMS_invitro_Reactivities_top_9_percent_constrained.DBN	0.0321649	0.0577042	0.0630121	0.131199	0.000590511		SARS_SF2_Mono_-1.ct	Pyle_SHAPE_SARS2_Reactivity_top_9_percent_constrained.DBN	0.0719882	0.113243	0.0722265	0.113295	0.00098436		SARS_SF2_Mono_-1.ct	Sun_Reactivities_top_9_percent_constrained.DBN	0.043947	0.150449	0.043947	0.150449	0.000735625
SARS_SF2_Mono_-1.ct	Rouskin_DMS_SARS2_Reactivity_top_10_percent_constrained.DBN	0.0218238	0.0829208	0.0425141	0.187347	0.000925649		SARS_SF2_Mono_-1.ct	Incarnato_SHAPE_SARS2_in_vitro_Reactivity_top_10_percent_constrained.DBN	0.0522533	0.157256	0.0535143	0.161042	0.000592675		SARS_SF2_Mono_-1.ct	SHAPE_in_vivo_Incar_top_10_percent_constrained.DBN	0.0639175	0.145111	0.064641	0.146311	0.000958845		SARS_SF2_Mono_-1.ct	Incar_DMS_invitro_Reactivities_top_10_percent_constrained.DBN	0.0342268	0.0660582	0.0670514	0.150193	0.000606667		SARS_SF2_Mono_-1.ct	Pyle_SHAPE_SARS2_Reactivity_top_10_percent_constrained.DBN	0.0797644	0.126083	0.0800284	0.126141	0.000984141		SARS_SF2_Mono_-1.ct	Sun_Reactivities_top_10_percent_constrained.DBN	0.0497791	0.165919	0.0497791	0.165919	0.000967657
SARS_SF2_Mono_-1.ct	Rouskin_DMS_SARS2_Reactivity_top_11_percent_constrained.DBN	0.0240651	0.0911974	0.0468804	0.206047	0.000899664		SARS_SF2_Mono_-1.ct	Incarnato_SHAPE_SARS2_in_vitro_Reactivity_top_11_percent_constrained.DBN	0.0567894	0.173886	0.0581599	0.178074	0.000827249		SARS_SF2_Mono_-1.ct	SHAPE_in_vivo_Incar_top_11_percent_constrained.DBN	0.0707511	0.159035	0.071552	0.160349	0.00110816		SARS_SF2_Mono_-1.ct	Incar_DMS_invitro_Reactivities_top_11_percent_constrained.DBN	0.0366421	0.0740254	0.071783	0.168308	0.00079638		SARS_SF2_Mono_-1.ct	Pyle_SHAPE_SARS2_Reactivity_top_11_percent_constrained.DBN	0.0872459	0.139387	0.0875347	0.139452	0.00104678		SARS_SF2_Mono_-1.ct	Sun_Reactivities_top_11_percent_constrained.DBN	0.0574374	0.178991	0.0574374	0.178991	0.00137077
SARS_SF2_Mono_-1.ct	Rouskin_DMS_SARS2_Reactivity_top_12_percent_constrained.DBN	0.0263065	0.0993967	0.0512467	0.224572	0.00098055		SARS_SF2_Mono_-1.ct	Incarnato_SHAPE_SARS2_in_vitro_Reactivity_top_12_percent_constrained.DBN	0.0628571	0.188506	0.0643741	0.193045	0.00119962		SARS_SF2_Mono_-1.ct	SHAPE_in_vivo_Incar_top_12_percent_constrained.DBN	0.0777025	0.172803	0.0785821	0.174232	0.00122486		SARS_SF2_Mono_-1.ct	Incar_DMS_invitro_Reactivities_top_12_percent_constrained.DBN	0.0394109	0.0814511	0.0772072	0.185192	0.0010045		SARS_SF2_Mono_-1.ct	Pyle_SHAPE_SARS2_Reactivity_top_12_percent_constrained.DBN	0.0957879	0.151222	0.096105	0.151292	0.00129661		SARS_SF2_Mono_-1.ct	Sun_Reactivities_top_12_percent_constrained.DBN	0.0638586	0.193688	0.0638586	0.193688	0.00124371
SARS_SF2_Mono_-1.ct	Rouskin_DMS_SARS2_Reactivity_top_13_percent_constrained.DBN	0.0290197	0.106977	0.0565322	0.241699	0.00127751		SARS_SF2_Mono_-1.ct	Incarnato_SHAPE_SARS2_in_vitro_Reactivity_top_13_percent_constrained.DBN	0.0680412	0.204285	0.0696833	0.209205	0.00111071		SARS_SF2_Mono_-1.ct	SHAPE_in_vivo_Incar_top_13_percent_constrained.DBN	0.0841826	0.187191	0.0851355	0.188738	0.00123689		SARS_SF2_Mono_-1.ct	Incar_DMS_invitro_Reactivities_top_13_percent_constrained.DBN	0.0418851	0.089341	0.0820542	0.20313	0.000984591		SARS_SF2_Mono_-1.ct	Pyle_SHAPE_SARS2_Reactivity_top_13_percent_constrained.DBN	0.104035	0.163444	0.10438	0.16352	0.00135308		SARS_SF2_Mono_-1.ct	Sun_Reactivities_top_13_percent_constrained.DBN	0.0718704	0.206296	0.0718704	0.206296	0.0016528
SARS_SF2_Mono_-1.ct	Rouskin_DMS_SARS2_Reactivity_top_14_percent_constrained.DBN	0.0317329	0.114635	0.0618178	0.259	0.00136896		SARS_SF2_Mono_-1.ct	Incarnato_SHAPE_SARS2_in_vitro_Reactivity_top_14_percent_constrained.DBN	0.0733432	0.21991	0.0751131	0.225206	0.00122284		SARS_SF2_Mono_-1.ct	SHAPE_in_vivo_Incar_top_14_percent_constrained.DBN	0.089838	0.202661	0.0908549	0.204336	0.00116868		SARS_SF2_Mono_-1.ct	Incar_DMS_invitro_Reactivities_top_14_percent_constrained.DBN	0.0438881	0.0977723	0.0859781	0.2223	0.000872269		SARS_SF2_Mono_-1.ct	Pyle_SHAPE_SARS2_Reactivity_top_14_percent_constrained.DBN	0.111635	0.176593	0.112004	0.176675	0.00134707		SARS_SF2_Mono_-1.ct	Sun_Reactivities_top_14_percent_constrained.DBN	0.0769367	0.222772	0.0769367	0.222772	0.00112863
SARS_SF2_Mono_-1.ct	Rouskin_DMS_SARS2_Reactivity_top_15_percent_constrained.DBN	0.0344461	0.122215	0.0671033	0.276127	0.00145948		SARS_SF2_Mono_-1.ct	Incarnato_SHAPE_SARS2_in_vitro_Reactivity_top_15_percent_constrained.DBN	0.0794109	0.23453	0.0813273	0.240177	0.00149251		SARS_SF2_Mono_-1.ct	SHAPE_in_vivo_Incar_top_15_percent_constrained.DBN	0.0961414	0.21728	0.0972297	0.219077	0.00139656		SARS_SF2_Mono_-1.ct	Incar_DMS_invitro_Reactivities_top_15_percent_constrained.DBN	0.0461267	0.105972	0.0903635	0.240943	0.00105664		SARS_SF2_Mono_-1.ct	Pyle_SHAPE_SARS2_Reactivity_top_15_percent_constrained.DBN	0.119764	0.18897	0.120161	0.189057	0.00154205		SARS_SF2_Mono_-1.ct	Sun_Reactivities_top_15_percent_constrained.DBN	0.0817673	0.239558	0.0817673	0.239558	0.00115721
SARS_SF2_Mono_-1.ct	Rouskin_DMS_SARS2_Reactivity_top_16_percent_constrained.DBN	0.0369234	0.130105	0.0719292	0.293953	0.0014186		SARS_SF2_Mono_-1.ct	Incarnato_SHAPE_SARS2_in_vitro_Reactivity_top_16_percent_constrained.DBN	0.0850074	0.249768	0.0870588	0.255783	0.00146602		SARS_SF2_Mono_-1.ct	SHAPE_in_vivo_Incar_top_16_percent_constrained.DBN	0.102622	0.231668	0.103783	0.233583	0.00153078		SARS_SF2_Mono_-1.ct	Incar_DMS_invitro_Reactivities_top_16_percent_constrained.DBN	0.0489543	0.11332	0.0959031	0.25765	0.00142726		SARS_SF2_Mono_-1.ct	Pyle_SHAPE_SARS2_Reactivity_top_16_percent_constrained.DBN	0.128247	0.200959	0.128672	0.201052	0.00171119		SARS_SF2_Mono_-1.ct	Sun_Reactivities_top_16_percent_constrained.DBN	0.0870103	0.255801	0.0870103	0.255801	0.00134117
SARS_SF2_Mono_-1.ct	Rouskin_DMS_SARS2_Reactivity_top_17_percent_constrained.DBN	0.0394007	0.137995	0.0767551	0.311779	0.00150462		SARS_SF2_Mono_-1.ct	Incarnato_SHAPE_SARS2_in_vitro_Reactivity_top_17_percent_constrained.DBN	0.0906038	0.265006	0.0927903	0.271388	0.00155547		SARS_SF2_Mono_-1.ct	SHAPE_in_vivo_Incar_top_17_percent_constrained.DBN	0.109161	0.245978	0.110396	0.248011	0.00164011		SARS_SF2_Mono_-1.ct	Incar_DMS_invitro_Reactivities_top_17_percent_constrained.DBN	0.0514286	0.12121	0.10075	0.275589	0.0013358		SARS_SF2_Mono_-1.ct	Pyle_SHAPE_SARS2_Reactivity_top_17_percent_constrained.DBN	0.1362	0.213567	0.136651	0.213667	0.00170489		SARS_SF2_Mono_-1.ct	Sun_Reactivities_top_17_percent_constrained.DBN	0.08919	0.276145	0.08919	0.276145	0.000601906
SARS_SF2_Mono_-1.ct	Rouskin_DMS_SARS2_Reactivity_top_18_percent_constrained.DBN	0.0429987	0.144415	0.0837642	0.326285	0.00228695		SARS_SF2_Mono_-1.ct	Incarnato_SHAPE_SARS2_in_vitro_Reactivity_top_18_percent_constrained.DBN	0.0978498	0.278079	0.100211	0.284775	0.00211326		SARS_SF2_Mono_-1.ct	SHAPE_in_vivo_Incar_top_18_percent_constrained.DBN	0.116171	0.259669	0.117486	0.261816	0.00185618		SARS_SF2_Mono_-1.ct	Incar_DMS_invitro_Reactivities_top_18_percent_constrained.DBN	0.0542563	0.128558	0.10629	0.292297	0.00161919		SARS_SF2_Mono_-1.ct	Pyle_SHAPE_SARS2_Reactivity_top_18_percent_constrained.DBN	0.14327	0.227336	0.143744	0.227442	0.00161316		SARS_SF2_Mono_-1.ct	Sun_Reactivities_top_18_percent_constrained.DBN	0.0934315	0.293704	0.0934315	0.293704	0.00124575
SARS_SF2_Mono_-1.ct	Rouskin_DMS_SARS2_Reactivity_top_19_percent_constrained.DBN	0.0461248	0.151532	0.0898541	0.342363	0.00208494		SARS_SF2_Mono_-1.ct	Incarnato_SHAPE_SARS2_in_vitro_Reactivity_top_19_percent_constrained.DBN	0.104624	0.29177	0.107149	0.298796	0.00207309		SARS_SF2_Mono_-1.ct	SHAPE_in_vivo_Incar_top_19_percent_constrained.DBN	0.122946	0.27367	0.124337	0.275932	0.00189051		SARS_SF2_Mono_-1.ct	Incar_DMS_invitro_Reactivities_top_19_percent_constrained.DBN	0.0572607	0.135752	0.112175	0.308653	0.00181665		SARS_SF2_Mono_-1.ct	Pyle_SHAPE_SARS2_Reactivity_top_19_percent_constrained.DBN	0.152165	0.238784	0.152669	0.238895	0.00213211		SARS_SF2_Mono_-1.ct	Sun_Reactivities_top_19_percent_constrained.DBN	0.0984389	0.310257	0.0984389	0.310257	0.00155357
SARS_SF2_Mono_-1.ct	Rouskin_DMS_SARS2_Reactivity_top_20_percent_constrained.DBN	0.0486021	0.159421	0.09468	0.360189	0.00173824		SARS_SF2_Mono_-1.ct	Incarnato_SHAPE_SARS2_in_vitro_Reactivity_top_20_percent_constrained.DBN	0.111517	0.305306	0.114208	0.312658	0.002207		SARS_SF2_Mono_-1.ct	SHAPE_in_vivo_Incar_top_20_percent_constrained.DBN	0.130133	0.287129	0.131606	0.289502	0.00210422		SARS_SF2_Mono_-1.ct	Incar_DMS_invitro_Reactivities_top_20_percent_constrained.DBN	0.0603829	0.142713	0.118292	0.324481	0.00198471		SARS_SF2_Mono_-1.ct	Pyle_SHAPE_SARS2_Reactivity_top_20_percent_constrained.DBN	0.160471	0.250928	0.161002	0.251045	0.00209216		SARS_SF2_Mono_-1.ct	Sun_Reactivities_top_20_percent_constrained.DBN	0.10433	0.32565	0.10433	0.32565	0.00191841
SARS_SF2_Mono_-1.ct	Rouskin_DMS_SARS2_Reactivity_top_21_percent_constrained.DBN	0.0511974	0.167157	0.0997357	0.377665	0.00190937		SARS_SF2_Mono_-1.ct	Incarnato_SHAPE_SARS2_in_vitro_Reactivity_top_21_percent_constrained.DBN	0.119057	0.317992	0.121931	0.32565	0.00251482		SARS_SF2_Mono_-1.ct	SHAPE_in_vivo_Incar_top_21_percent_constrained.DBN	0.136613	0.301516	0.138159	0.304009	0.00199231		SARS_SF2_Mono_-1.ct	Incar_DMS_invitro_Reactivities_top_21_percent_constrained.DBN	0.0632106	0.150139	0.123832	0.341365	0.001891		SARS_SF2_Mono_-1.ct	Pyle_SHAPE_SARS2_Reactivity_top_21_percent_constrained.DBN	0.168778	0.26315	0.169336	0.263272	0.00219406		SARS_SF2_Mono_-1.ct	Sun_Reactivities_top_21_percent_constrained.DBN	0.108395	0.343441	0.108395	0.343441	0.00139602
SARS_SF2_Mono_-1.ct	Rouskin_DMS_SARS2_Reactivity_top_22_percent_constrained.DBN	0.0540875	0.174582	0.105366	0.394443	0.00222081		SARS_SF2_Mono_-1.ct	Incarnato_SHAPE_SARS2_in_vitro_Reactivity_top_22_percent_constrained.DBN	0.126186	0.331219	0.129231	0.339195	0.00247618		SARS_SF2_Mono_-1.ct	SHAPE_in_vivo_Incar_top_22_percent_constrained.DBN	0.143328	0.315671	0.144951	0.318281	0.00216169		SARS_SF2_Mono_-1.ct	Incar_DMS_invitro_Reactivities_top_22_percent_constrained.DBN	0.0658616	0.15772	0.129025	0.3586	0.00186232		SARS_SF2_Mono_-1.ct	Pyle_SHAPE_SARS2_Reactivity_top_22_percent_constrained.DBN	0.177202	0.275139	0.177788	0.275267	0.00232657		SARS_SF2_Mono_-1.ct	Sun_Reactivities_top_22_percent_constrained.DBN	0.114109	0.359066	0.114109	0.359066	0.0020518
SARS_SF2_Mono_-1.ct	Rouskin_DMS_SARS2_Reactivity_top_23_percent_constrained.DBN	0.0573906	0.181389	0.111801	0.409822	0.00263702		SARS_SF2_Mono_-1.ct	Incarnato_SHAPE_SARS2_in_vitro_Reactivity_top_23_percent_constrained.DBN	0.133137	0.344678	0.13635	0.352978	0.00251291		SARS_SF2_Mono_-1.ct	SHAPE_in_vivo_Incar_top_23_percent_constrained.DBN	0.150162	0.329595	0.151862	0.332319	0.00229664		SARS_SF2_Mono_-1.ct	Incar_DMS_invitro_Reactivities_top_23_percent_constrained.DBN	0.0681591	0.165842	0.133526	0.377066	0.00169713		SARS_SF2_Mono_-1.ct	Pyle_SHAPE_SARS2_Reactivity_top_23_percent_constrained.DBN	0.184801	0.288212	0.185413	0.288345	0.00219851		SARS_SF2_Mono_-1.ct	Sun_Reactivities_top_23_percent_constrained.DBN	0.119529	0.375077	0.119529	0.375077	0.00203282
SARS_SF2_Mono_-1.ct	Rouskin_DMS_SARS2_Reactivity_top_24_percent_constrained.DBN	0.0605167	0.188428	0.11789	0.425725	0.0025926		SARS_SF2_Mono_-1.ct	Incarnato_SHAPE_SARS2_in_vitro_Reactivity_top_24_percent_constrained.DBN	0.140913	0.357054	0.144314	0.365653	0.00291199		SARS_SF2_Mono_-1.ct	SHAPE_in_vivo_Incar_top_24_percent_constrained.DBN	0.157349	0.343054	0.15913	0.34589	0.00251406		SARS_SF2_Mono_-1.ct	Incar_DMS_invitro_Reactivities_top_24_percent_constrained.DBN	0.0712224	0.172881	0.139527	0.393071	0.00235888		SARS_SF2_Mono_-1.ct	Pyle_SHAPE_SARS2_Reactivity_top_24_percent_constrained.DBN	0.193461	0.299969	0.194101	0.300108	0.00260748		SARS_SF2_Mono_-1.ct	Sun_Reactivities_top_24_percent_constrained.DBN	0.12489	0.391166	0.12489	0.391166	0.00209697
SARS_SF2_Mono_-1.ct	Rouskin_DMS_SARS2_Reactivity_top_25_percent_constrained.DBN	0.0633479	0.195854	0.123406	0.442503	0.00244055		SARS_SF2_Mono_-1.ct	Incarnato_SHAPE_SARS2_in_vitro_Reactivity_top_25_percent_constrained.DBN	0.148571	0.369585	0.152157	0.378485	0.00296851		SARS_SF2_Mono_-1.ct	SHAPE_in_vivo_Incar_top_25_percent_constrained.DBN	0.165007	0.355894	0.166875	0.358836	0.00277919		SARS_SF2_Mono_-1.ct	Incar_DMS_invitro_Reactivities_top_25_percent_constrained.DBN	0.0743446	0.17992	0.145643	0.409075	0.00250213		SARS_SF2_Mono_-1.ct	Pyle_SHAPE_SARS2_Reactivity_top_25_percent_constrained.DBN	0.201885	0.311959	0.202553	0.312103	0.00263791		SARS_SF2_Mono_-1.ct	Sun_Reactivities_top_25_percent_constrained.DBN	0.12972	0.407952	0.12972	0.407952	0.00197067
SARS_SF2_Mono_-1.ct	Rouskin_DMS_SARS2_Reactivity_top_26_percent_constrained.DBN	0.0659431	0.203589	0.128461	0.459979	0.00232553		SARS_SF2_Mono_-1.ct	Incarnato_SHAPE_SARS2_in_vitro_Reactivity_top_26_percent_constrained.DBN	0.156112	0.382271	0.159879	0.391477	0.00302317		SARS_SF2_Mono_-1.ct	SHAPE_in_vivo_Incar_top_26_percent_constrained.DBN	0.172489	0.368967	0.174441	0.372017	0.00281478		SARS_SF2_Mono_-1.ct	Incar_DMS_invitro_Reactivities_top_26_percent_constrained.DBN	0.0771723	0.187268	0.151183	0.425783	0.00235863		SARS_SF2_Mono_-1.ct	Pyle_SHAPE_SARS2_Reactivity_top_26_percent_constrained.DBN	0.209543	0.325031	0.210237	0.325182	0.00249859		SARS_SF2_Mono_-1.ct	Sun_Reactivities_top_26_percent_constrained.DBN	0.135847	0.423035	0.135847	0.423035	0.00259179
SARS_SF2_Mono_-1.ct	Rouskin_DMS_SARS2_Reactivity_top_27_percent_constrained.DBN	0.0690692	0.210705	0.134551	0.476057	0.00289912		SARS_SF2_Mono_-1.ct	Incarnato_SHAPE_SARS2_in_vitro_Reactivity_top_27_percent_constrained.DBN	0.164242	0.394183	0.168205	0.403676	0.00336092		SARS_SF2_Mono_-1.ct	SHAPE_in_vivo_Incar_top_27_percent_constrained.DBN	0.178733	0.383663	0.180757	0.386835	0.00244293		SARS_SF2_Mono_-1.ct	Incar_DMS_invitro_Reactivities_top_27_percent_constrained.DBN	0.0802356	0.194384	0.157184	0.441963	0.00265229		SARS_SF2_Mono_-1.ct	Pyle_SHAPE_SARS2_Reactivity_top_27_percent_constrained.DBN	0.217437	0.337717	0.218157	0.337873	0.00267599		SARS_SF2_Mono_-1.ct	Sun_Reactivities_top_27_percent_constrained.DBN	0.142622	0.437268	0.142622	0.437268	0.00296235
SARS_SF2_Mono_-1.ct	Rouskin_DMS_SARS2_Reactivity_top_28_percent_constrained.DBN	0.0723723	0.217512	0.140986	0.491437	0.00316218		SARS_SF2_Mono_-1.ct	Incarnato_SHAPE_SARS2_in_vitro_Reactivity_top_28_percent_constrained.DBN	0.172548	0.405863	0.176712	0.415637	0.00353573		SARS_SF2_Mono_-1.ct	SHAPE_in_vivo_Incar_top_28_percent_constrained.DBN	0.185803	0.397277	0.187906	0.400562	0.00286371		SARS_SF2_Mono_-1.ct	Incar_DMS_invitro_Reactivities_top_28_percent_constrained.DBN	0.0840059	0.200495	0.16457	0.455856	0.00336697		SARS_SF2_Mono_-1.ct	Pyle_SHAPE_SARS2_Reactivity_top_28_percent_constrained.DBN	0.225272	0.35048	0.226018	0.350642	0.00275639		SARS_SF2_Mono_-1.ct	Sun_Reactivities_top_28_percent_constrained.DBN	0.148866	0.452197	0.148866	0.452197	0.00282373
SARS_SF2_Mono_-1.ct	Rouskin_DMS_SARS2_Reactivity_top_29_percent_constrained.DBN	0.0757343	0.224242	0.147535	0.506641	0.00331823		SARS_SF2_Mono_-1.ct	Incarnato_SHAPE_SARS2_in_vitro_Reactivity_top_29_percent_constrained.DBN	0.180854	0.417543	0.185219	0.427598	0.00363749		SARS_SF2_Mono_-1.ct	SHAPE_in_vivo_Incar_top_29_percent_constrained.DBN	0.194109	0.409267	0.196306	0.41265	0.00346641		SARS_SF2_Mono_-1.ct	Incar_DMS_invitro_Reactivities_top_29_percent_constrained.DBN	0.0880707	0.206296	0.172533	0.469047	0.00373505		SARS_SF2_Mono_-1.ct	Pyle_SHAPE_SARS2_Reactivity_top_29_percent_constrained.DBN	0.234227	0.36185	0.235002	0.362018	0.00325237		SARS_SF2_Mono_-1.ct	Sun_Reactivities_top_29_percent_constrained.DBN	0.155346	0.466816	0.155346	0.466816	0.00302502
SARS_SF2_Mono_-1.ct	Rouskin_DMS_SARS2_Reactivity_top_30_percent_constrained.DBN	0.0789784	0.231204	0.153855	0.52237	0.0033012		SARS_SF2_Mono_-1.ct	Incarnato_SHAPE_SARS2_in_vitro_Reactivity_top_30_percent_constrained.DBN	0.190044	0.428063	0.19463	0.438371	0.00412585		SARS_SF2_Mono_-1.ct	SHAPE_in_vivo_Incar_top_30_percent_constrained.DBN	0.202003	0.421798	0.20429	0.425285	0.00339518		SARS_SF2_Mono_-1.ct	Incar_DMS_invitro_Reactivities_top_30_percent_constrained.DBN	0.0917231	0.212562	0.179688	0.483292	0.00345806		SARS_SF2_Mono_-1.ct	Pyle_SHAPE_SARS2_Reactivity_top_30_percent_constrained.DBN	0.242474	0.374072	0.243277	0.374245	0.00309678		SARS_SF2_Mono_-1.ct	Sun_Reactivities_top_30_percent_constrained.DBN	0.161826	0.481436	0.161826	0.481436	0.00311976
SARS_SF2_Mono_-1.ct	Rouskin_DMS_SARS2_Reactivity_top_31_percent_constrained.DBN	0.0822815	0.238011	0.16029	0.537749	0.00346018		SARS_SF2_Mono_-1.ct	Incarnato_SHAPE_SARS2_in_vitro_Reactivity_top_31_percent_constrained.DBN	0.198056	0.44013	0.202836	0.450729	0.00369829		SARS_SF2_Mono_-1.ct	SHAPE_in_vivo_Incar_top_31_percent_constrained.DBN	0.20972	0.434561	0.212094	0.438153	0.0034196		SARS_SF2_Mono_-1.ct	Incar_DMS_invitro_Reactivities_top_31_percent_constrained.DBN	0.0952577	0.219059	0.186613	0.498065	0.00344881		SARS_SF2_Mono_-1.ct	Pyle_SHAPE_SARS2_Reactivity_top_31_percent_constrained.DBN	0.250957	0.386061	0.251788	0.386241	0.00328735		SARS_SF2_Mono_-1.ct	Sun_Reactivities_top_31_percent_constrained.DBN	0.167776	0.496751	0.167776	0.496751	0.00295563
SARS_SF2_Mono_-1.ct	Rouskin_DMS_SARS2_Reactivity_top_32_percent_constrained.DBN	0.0858794	0.244431	0.167299	0.552254	0.00387079		SARS_SF2_Mono_-1.ct	Incarnato_SHAPE_SARS2_in_vitro_Reactivity_top_32_percent_constrained.DBN	0.206009	0.452274	0.21098	0.463165	0.00377239		SARS_SF2_Mono_-1.ct	SHAPE_in_vivo_Incar_top_32_percent_constrained.DBN	0.218203	0.446318	0.220673	0.450008	0.00386066		SARS_SF2_Mono_-1.ct	Incar_DMS_invitro_Reactivities_top_32_percent_constrained.DBN	0.0995582	0.224474	0.195038	0.510376	0.00429977		SARS_SF2_Mono_-1.ct	Pyle_SHAPE_SARS2_Reactivity_top_32_percent_constrained.DBN	0.25944	0.397973	0.260299	0.398158	0.00338878		SARS_SF2_Mono_-1.ct	Sun_Reactivities_top_32_percent_constrained.DBN	0.174551	0.510984	0.174551	0.510984	0.00346175
SARS_SF2_Mono_-1.ct	Rouskin_DMS_SARS2_Reactivity_top_33_percent_constrained.DBN	0.0898903	0.250309	0.175112	0.565537	0.00441876		SARS_SF2_Mono_-1.ct	Incarnato_SHAPE_SARS2_in_vitro_Reactivity_top_33_percent_constrained.DBN	0.214374	0.463877	0.219548	0.475048	0.00406979		SARS_SF2_Mono_-1.ct	SHAPE_in_vivo_Incar_top_33_percent_constrained.DBN	0.227747	0.456683	0.230325	0.460459	0.0044441		SARS_SF2_Mono_-1.ct	Incar_DMS_invitro_Reactivities_top_33_percent_constrained.DBN	0.102798	0.231358	0.201385	0.526029	0.0033389		SARS_SF2_Mono_-1.ct	Pyle_SHAPE_SARS2_Reactivity_top_33_percent_constrained.DBN	0.267393	0.410659	0.268278	0.41085	0.00327825		SARS_SF2_Mono_-1.ct	Sun_Reactivities_top_33_percent_constrained.DBN	0.182857	0.523205	0.182857	0.523205	0.00434592
SARS_SF2_Mono_-1.ct	Rouskin_DMS_SARS2_Reactivity_top_34_percent_constrained.DBN	0.0934883	0.25673	0.182121	0.580042	0.00406556		SARS_SF2_Mono_-1.ct	Incarnato_SHAPE_SARS2_in_vitro_Reactivity_top_34_percent_constrained.DBN	0.222327	0.476021	0.227692	0.487484	0.00397046		SARS_SF2_Mono_-1.ct	SHAPE_in_vivo_Incar_top_34_percent_constrained.DBN	0.236053	0.468673	0.238725	0.472547	0.00396957		SARS_SF2_Mono_-1.ct	Incar_DMS_invitro_Reactivities_top_34_percent_constrained.DBN	0.106392	0.237701	0.208425	0.54045	0.00380467		SARS_SF2_Mono_-1.ct	Pyle_SHAPE_SARS2_Reactivity_top_34_percent_constrained.DBN	0.276524	0.42172	0.27744	0.421916	0.0038653		SARS_SF2_Mono_-1.ct	Sun_Reactivities_top_34_percent_constrained.DBN	0.191281	0.535272	0.191281	0.535272	0.00450922
SARS_SF2_Mono_-1.ct	Rouskin_DMS_SARS2_Reactivity_top_35_percent_constrained.DBN	0.097912	0.262144	0.190739	0.592275	0.00510406		SARS_SF2_Mono_-1.ct	Incarnato_SHAPE_SARS2_in_vitro_Reactivity_top_35_percent_constrained.DBN	0.231105	0.487082	0.236682	0.498812	0.00448404		SARS_SF2_Mono_-1.ct	SHAPE_in_vivo_Incar_top_35_percent_constrained.DBN	0.244713	0.480198	0.247483	0.484168	0.00424025		SARS_SF2_Mono_-1.ct	Incar_DMS_invitro_Reactivities_top_35_percent_constrained.DBN	0.110221	0.243812	0.215926	0.554344	0.00415838		SARS_SF2_Mono_-1.ct	Pyle_SHAPE_SARS2_Reactivity_top_35_percent_constrained.DBN	0.285655	0.432782	0.286601	0.432983	0.00396668		SARS_SF2_Mono_-1.ct	Sun_Reactivities_top_35_percent_constrained.DBN	0.198409	0.549041	0.198409	0.549041	0.00391363
SARS_SF2_Mono_-1.ct	Rouskin_DMS_SARS2_Reactivity_top_36_percent_constrained.DBN	0.102277	0.267559	0.199242	0.604509	0.00514003		SARS_SF2_Mono_-1.ct	Incarnato_SHAPE_SARS2_in_vitro_Reactivity_top_36_percent_constrained.DBN	0.239234	0.498994	0.245008	0.511011	0.00425457		SARS_SF2_Mono_-1.ct	SHAPE_in_vivo_Incar_top_36_percent_constrained.DBN	0.25296	0.492342	0.255824	0.496412	0.00414047		SARS_SF2_Mono_-1.ct	Incar_DMS_invitro_Reactivities_top_36_percent_constrained.DBN	0.114521	0.249226	0.224351	0.566655	0.0047739		SARS_SF2_Mono_-1.ct	Pyle_SHAPE_SARS2_Reactivity_top_36_percent_constrained.DBN	0.293726	0.445312	0.294698	0.445519	0.00360755		SARS_SF2_Mono_-1.ct	Sun_Reactivities_top_36_percent_constrained.DBN	0.206539	0.561494	0.206539	0.561494	0.00456473
SARS_SF2_Mono_-1.ct	Rouskin_DMS_SARS2_Reactivity_top_37_percent_constrained.DBN	0.106288	0.273438	0.207055	0.617791	0.00482705		SARS_SF2_Mono_-1.ct	Incarnato_SHAPE_SARS2_in_vitro_Reactivity_top_37_percent_constrained.DBN	0.246657	0.511835	0.252609	0.52416	0.00398457		SARS_SF2_Mono_-1.ct	SHAPE_in_vivo_Incar_top_37_percent_constrained.DBN	0.261502	0.504022	0.264462	0.508189	0.00439008		SARS_SF2_Mono_-1.ct	Incar_DMS_invitro_Reactivities_top_37_percent_constrained.DBN	0.118468	0.255183	0.232083	0.580197	0.00448623		SARS_SF2_Mono_-1.ct	Pyle_SHAPE_SARS2_Reactivity_top_37_percent_constrained.DBN	0.30268	0.456606	0.303682	0.456818	0.00410404		SARS_SF2_Mono_-1.ct	Sun_Reactivities_top_37_percent_constrained.DBN	0.214256	0.574489	0.214256	0.574489	0.00443347
SARS_SF2_Mono_-1.ct	Rouskin_DMS_SARS2_Reactivity_top_38_percent_constrained.DBN	0.110711	0.278852	0.215673	0.630024	0.00542937		SARS_SF2_Mono_-1.ct	Incarnato_SHAPE_SARS2_in_vitro_Reactivity_top_38_percent_constrained.DBN	0.25567	0.522587	0.26184	0.535171	0.00494004		SARS_SF2_Mono_-1.ct	SHAPE_in_vivo_Incar_top_38_percent_constrained.DBN	0.270633	0.514929	0.273697	0.519186	0.00479439		SARS_SF2_Mono_-1.ct	Incar_DMS_invitro_Reactivities_top_38_percent_constrained.DBN	0.122474	0.260984	0.239931	0.593387	0.0046567		SARS_SF2_Mono_-1.ct	Pyle_SHAPE_SARS2_Reactivity_top_38_percent_constrained.DBN	0.312106	0.467358	0.313139	0.467575	0.00442177		SARS_SF2_Mono_-1.ct	Sun_Reactivities_top_38_percent_constrained.DBN	0.222563	0.586711	0.222563	0.586711	0.00487342
SARS_SF2_Mono_-1.ct	Rouskin_DMS_SARS2_Reactivity_top_39_percent_constrained.DBN	0.115548	0.283648	0.225095	0.64086	0.00603821		SARS_SF2_Mono_-1.ct	Incarnato_SHAPE_SARS2_in_vitro_Reactivity_top_39_percent_constrained.DBN	0.263623	0.534731	0.269985	0.547608	0.00446015		SARS_SF2_Mono_-1.ct	SHAPE_in_vivo_Incar_top_39_percent_constrained.DBN	0.279352	0.526377	0.282514	0.530728	0.00467964		SARS_SF2_Mono_-1.ct	Incar_DMS_invitro_Reactivities_top_39_percent_constrained.DBN	0.126775	0.266476	0.248355	0.605874	0.00510431		SARS_SF2_Mono_-1.ct	Pyle_SHAPE_SARS2_Reactivity_top_39_percent_constrained.DBN	0.321473	0.47811	0.322537	0.478332	0.00449523		SARS_SF2_Mono_-1.ct	Sun_Reactivities_top_39_percent_constrained.DBN	0.230398	0.599551	0.230398	0.599551	0.00469752
SARS_SF2_Mono_-1.ct	Rouskin_DMS_SARS2_Reactivity_top_40_percent_constrained.DBN	0.120326	0.288521	0.234402	0.65187	0.00606704		SARS_SF2_Mono_-1.ct	Incarnato_SHAPE_SARS2_in_vitro_Reactivity_top_40_percent_constrained.DBN	0.272165	0.546101	0.278733	0.559252	0.0048924		SARS_SF2_Mono_-1.ct	SHAPE_in_vivo_Incar_top_40_percent_constrained.DBN	0.288012	0.537902	0.291272	0.542349	0.0047498		SARS_SF2_Mono_-1.ct	Incar_DMS_invitro_Reactivities_top_40_percent_constrained.DBN	0.131252	0.271658	0.257126	0.617657	0.00541742		SARS_SF2_Mono_-1.ct	Pyle_SHAPE_SARS2_Reactivity_top_40_percent_constrained.DBN	0.329897	0.490099	0.330989	0.490327	0.00414426		SARS_SF2_Mono_-1.ct	Sun_Reactivities_top_40_percent_constrained.DBN	0.23894	0.611463	0.23894	0.611463	0.0052231
SARS_SF2_Mono_-1.ct	Rouskin_DMS_SARS2_Reactivity_top_41_percent_constrained.DBN	0.125044	0.293472	0.243594	0.663055	0.00609495		SARS_SF2_Mono_-1.ct	Incarnato_SHAPE_SARS2_in_vitro_Reactivity_top_41_percent_constrained.DBN	0.281591	0.556312	0.288386	0.569708	0.00549945		SARS_SF2_Mono_-1.ct	SHAPE_in_vivo_Incar_top_41_percent_constrained.DBN	0.297261	0.548654	0.300626	0.55319	0.00517431		SARS_SF2_Mono_-1.ct	Incar_DMS_invitro_Reactivities_top_41_percent_constrained.DBN	0.136082	0.276454	0.26659	0.628561	0.0059483		SARS_SF2_Mono_-1.ct	Pyle_SHAPE_SARS2_Reactivity_top_41_percent_constrained.DBN	0.339028	0.501238	0.34015	0.50147	0.00459412		SARS_SF2_Mono_-1.ct	Sun_Reactivities_top_41_percent_constrained.DBN	0.247364	0.62353	0.247364	0.62353	0.00525271
SARS_SF2_Mono_-1.ct	Rouskin_DMS_SARS2_Reactivity_top_42_percent_constrained.DBN	0.129881	0.298267	0.253016	0.67389	0.00634942		SARS_SF2_Mono_-1.ct	Incarnato_SHAPE_SARS2_in_vitro_Reactivity_top_42_percent_constrained.DBN	0.291546	0.565826	0.298582	0.579452	0.00590814		SARS_SF2_Mono_-1.ct	SHAPE_in_vivo_Incar_top_42_percent_constrained.DBN	0.306981	0.558787	0.310456	0.563407	0.0055384		SARS_SF2_Mono_-1.ct	Incar_DMS_invitro_Reactivities_top_42_percent_constrained.DBN	0.140324	0.281946	0.274899	0.641048	0.00532666		SARS_SF2_Mono_-1.ct	Pyle_SHAPE_SARS2_Reactivity_top_42_percent_constrained.DBN	0.347629	0.512995	0.348779	0.513233	0.00442887		SARS_SF2_Mono_-1.ct	Sun_Reactivities_top_42_percent_constrained.DBN	0.25567	0.635752	0.25567	0.635752	0.00528077
SARS_SF2_Mono_-1.ct	Rouskin_DMS_SARS2_Reactivity_top_43_percent_constrained.DBN	0.1346	0.303295	0.262208	0.68525	0.00629898		SARS_SF2_Mono_-1.ct	Incarnato_SHAPE_SARS2_in_vitro_Reactivity_top_43_percent_constrained.DBN	0.301384	0.575495	0.308658	0.589354	0.00593798		SARS_SF2_Mono_-1.ct	SHAPE_in_vivo_Incar_top_43_percent_constrained.DBN	0.31511	0.571009	0.318677	0.575729	0.00473343		SARS_SF2_Mono_-1.ct	Incar_DMS_invitro_Reactivities_top_43_percent_constrained.DBN	0.144742	0.287283	0.283555	0.653183	0.00565363		SARS_SF2_Mono_-1.ct	Pyle_SHAPE_SARS2_Reactivity_top_43_percent_constrained.DBN	0.356053	0.525062	0.357232	0.525306	0.0044399		SARS_SF2_Mono_-1.ct	Sun_Reactivities_top_43_percent_constrained.DBN	0.265626	0.645808	0.265626	0.645808	0.00642954
SARS_SF2_Mono_-1.ct	Rouskin_DMS_SARS2_Reactivity_top_44_percent_constrained.DBN	0.139554	0.307936	0.27186	0.695736	0.00671513		SARS_SF2_Mono_-1.ct	Incarnato_SHAPE_SARS2_in_vitro_Reactivity_top_44_percent_constrained.DBN	0.311458	0.584855	0.318974	0.598939	0.00617909		SARS_SF2_Mono_-1.ct	SHAPE_in_vivo_Incar_top_44_percent_constrained.DBN	0.324477	0.581606	0.32815	0.586414	0.00555495		SARS_SF2_Mono_-1.ct	Incar_DMS_invitro_Reactivities_top_44_percent_constrained.DBN	0.149161	0.292543	0.29221	0.665142	0.00575715		SARS_SF2_Mono_-1.ct	Pyle_SHAPE_SARS2_Reactivity_top_44_percent_constrained.DBN	0.365361	0.535891	0.36657	0.53614	0.0050068		SARS_SF2_Mono_-1.ct	Sun_Reactivities_top_44_percent_constrained.DBN	0.275052	0.656559	0.275052	0.656559	0.00618848
SARS_SF2_Mono_-1.ct	Rouskin_DMS_SARS2_Reactivity_top_45_percent_constrained.DBN	0.144332	0.312809	0.281167	0.706746	0.00657778		SARS_SF2_Mono_-1.ct	Incarnato_SHAPE_SARS2_in_vitro_Reactivity_top_45_percent_constrained.DBN	0.32053	0.595529	0.328265	0.60987	0.00566636		SARS_SF2_Mono_-1.ct	SHAPE_in_vivo_Incar_top_45_percent_constrained.DBN	0.334551	0.591275	0.338338	0.596163	0.00607351		SARS_SF2_Mono_-1.ct	Incar_DMS_invitro_Reactivities_top_45_percent_constrained.DBN	0.153697	0.297726	0.301096	0.676926	0.00601538		SARS_SF2_Mono_-1.ct	Pyle_SHAPE_SARS2_Reactivity_top_45_percent_constrained.DBN	0.373962	0.547649	0.375199	0.547903	0.00472805		SARS_SF2_Mono_-1.ct	Sun_Reactivities_top_45_percent_constrained.DBN	0.285066	0.666538	0.285066	0.666538	0.00667519
SARS_SF2_Mono_-1.ct	Rouskin_DMS_SARS2_Reactivity_top_46_percent_constrained.DBN	0.149758	0.316909	0.291738	0.716008	0.00756897		SARS_SF2_Mono_-1.ct	Incarnato_SHAPE_SARS2_in_vitro_Reactivity_top_46_percent_constrained.DBN	0.330368	0.605198	0.338341	0.619772	0.00624446		SARS_SF2_Mono_-1.ct	SHAPE_in_vivo_Incar_top_46_percent_constrained.DBN	0.343741	0.602104	0.347632	0.607082	0.00564222		SARS_SF2_Mono_-1.ct	Incar_DMS_invitro_Reactivities_top_46_percent_constrained.DBN	0.158527	0.302444	0.31056	0.687654	0.00650752		SARS_SF2_Mono_-1.ct	Pyle_SHAPE_SARS2_Reactivity_top_46_percent_constrained.DBN	0.383505	0.558246	0.384775	0.558505	0.0053477		SARS_SF2_Mono_-1.ct	Sun_Reactivities_top_46_percent_constrained.DBN	0.294669	0.677058	0.294669	0.677058	0.00650135
SARS_SF2_Mono_-1.ct	Rouskin_DMS_SARS2_Reactivity_top_47_percent_constrained.DBN	0.154536	0.321782	0.301046	0.727019	0.00676646		SARS_SF2_Mono_-1.ct	Incarnato_SHAPE_SARS2_in_vitro_Reactivity_top_47_percent_constrained.DBN	0.339912	0.615254	0.348115	0.63007	0.00615815		SARS_SF2_Mono_-1.ct	SHAPE_in_vivo_Incar_top_47_percent_constrained.DBN	0.353225	0.612546	0.357224	0.61761	0.00592406		SARS_SF2_Mono_-1.ct	Incar_DMS_invitro_Reactivities_top_47_percent_constrained.DBN	0.163711	0.306776	0.320716	0.697503	0.0070837		SARS_SF2_Mono_-1.ct	Pyle_SHAPE_SARS2_Reactivity_top_47_percent_constrained.DBN	0.392636	0.569307	0.393936	0.569571	0.00521801		SARS_SF2_Mono_-1.ct	Sun_Reactivities_top_47_percent_constrained.DBN	0.304094	0.687809	0.304094	0.687809	0.00648303
SARS_SF2_Mono_-1.ct	Rouskin_DMS_SARS2_Reactivity_top_48_percent_constrained.DBN	0.159667	0.326191	0.311042	0.73698	0.00736726		SARS_SF2_Mono_-1.ct	Incarnato_SHAPE_SARS2_in_vitro_Reactivity_top_48_percent_constrained.DBN	0.349985	0.624613	0.358431	0.639655	0.00659915		SARS_SF2_Mono_-1.ct	SHAPE_in_vivo_Incar_top_48_percent_constrained.DBN	0.363358	0.622138	0.367471	0.627281	0.0064279		SARS_SF2_Mono_-1.ct	Incar_DMS_invitro_Reactivities_top_48_percent_constrained.DBN	0.168306	0.311804	0.329717	0.708934	0.00638164		SARS_SF2_Mono_-1.ct	Pyle_SHAPE_SARS2_Reactivity_top_48_percent_constrained.DBN	0.401473	0.580832	0.402802	0.581102	0.00515192		SARS_SF2_Mono_-1.ct	Sun_Reactivities_top_48_percent_constrained.DBN	0.31405	0.697865	0.31405	0.697865	0.00694782
SARS_SF2_Mono_-1.ct	Rouskin_DMS_SARS2_Reactivity_top_49_percent_constrained.DBN	0.164622	0.330832	0.320694	0.747466	0.00721442		SARS_SF2_Mono_-1.ct	Incarnato_SHAPE_SARS2_in_vitro_Reactivity_top_49_percent_constrained.DBN	0.360825	0.632967	0.369532	0.64821	0.00719581		SARS_SF2_Mono_-1.ct	SHAPE_in_vivo_Incar_top_49_percent_constrained.DBN	0.373019	0.632348	0.377242	0.637576	0.00622952		SARS_SF2_Mono_-1.ct	Incar_DMS_invitro_Reactivities_top_49_percent_constrained.DBN	0.173019	0.316754	0.33895	0.72019	0.00664919		SARS_SF2_Mono_-1.ct	Pyle_SHAPE_SARS2_Reactivity_top_49_percent_constrained.DBN	0.410545	0.591971	0.411904	0.592246	0.00539074		SARS_SF2_Mono_-1.ct	Sun_Reactivities_top_49_percent_constrained.DBN	0.323947	0.707998	0.323947	0.707998	0.00700699
SARS_SF2_Mono_-1.ct	Rouskin_DMS_SARS2_Reactivity_top_50_percent_constrained.DBN	0.170107	0.334777	0.33138	0.756379	0.00808264		SARS_SF2_Mono_-1.ct	Incarnato_SHAPE_SARS2_in_vitro_Reactivity_top_50_percent_constrained.DBN	0.371429	0.641631	0.380392	0.657082	0.00713573		SARS_SF2_Mono_-1.ct	SHAPE_in_vivo_Incar_top_50_percent_constrained.DBN	0.382504	0.642868	0.386833	0.648183	0.0062173		SARS_SF2_Mono_-1.ct	Incar_DMS_invitro_Reactivities_top_50_percent_constrained.DBN	0.178439	0.320777	0.349567	0.729335	0.00774366		SARS_SF2_Mono_-1.ct	Pyle_SHAPE_SARS2_Reactivity_top_50_percent_constrained.DBN	0.42056	0.601872	0.421952	0.602151	0.00605034		SARS_SF2_Mono_-1.ct	Sun_Reactivities_top_50_percent_constrained.DBN	0.334021	0.717976	0.334021	0.717976	0.00723263
SARS_SF2_Mono_-1.ct	Rouskin_DMS_SARS2_Reactivity_top_51_percent_constrained.DBN	0.175593	0.3388	0.342066	0.765467	0.00817975		SARS_SF2_Mono_-1.ct	Incarnato_SHAPE_SARS2_in_vitro_Reactivity_top_51_percent_constrained.DBN	0.381267	0.651222	0.390468	0.666904	0.00671934		SARS_SF2_Mono_-1.ct	SHAPE_in_vivo_Incar_top_51_percent_constrained.DBN	0.392283	0.652924	0.396723	0.658322	0.00651066		SARS_SF2_Mono_-1.ct	Incar_DMS_invitro_Reactivities_top_51_percent_constrained.DBN	0.183446	0.325263	0.359377	0.739536	0.00725453		SARS_SF2_Mono_-1.ct	Pyle_SHAPE_SARS2_Reactivity_top_51_percent_constrained.DBN	0.429043	0.613861	0.430463	0.614146	0.00522709		SARS_SF2_Mono_-1.ct	Sun_Reactivities_top_51_percent_constrained.DBN	0.344035	0.727955	0.344035	0.727955	0.00729027
SARS_SF2_Mono_-1.ct	Rouskin_DMS_SARS2_Reactivity_top_52_percent_constrained.DBN	0.180665	0.343286	0.351948	0.775603	0.00766424		SARS_SF2_Mono_-1.ct	Incarnato_SHAPE_SARS2_in_vitro_Reactivity_top_52_percent_constrained.DBN	0.391046	0.660968	0.400483	0.676885	0.00677906		SARS_SF2_Mono_-1.ct	SHAPE_in_vivo_Incar_top_52_percent_constrained.DBN	0.402121	0.662902	0.406673	0.668382	0.00664998		SARS_SF2_Mono_-1.ct	Incar_DMS_invitro_Reactivities_top_52_percent_constrained.DBN	0.188454	0.329827	0.369186	0.749912	0.00735632		SARS_SF2_Mono_-1.ct	Pyle_SHAPE_SARS2_Reactivity_top_52_percent_constrained.DBN	0.437761	0.625464	0.43921	0.625755	0.00547383		SARS_SF2_Mono_-1.ct	Sun_Reactivities_top_52_percent_constrained.DBN	0.354757	0.737005	0.354757	0.737005	0.00790191
SARS_SF2_Mono_-1.ct	Rouskin_DMS_SARS2_Reactivity_top_53_percent_constrained.DBN	0.185797	0.347695	0.361944	0.785564	0.00785294		SARS_SF2_Mono_-1.ct	Incarnato_SHAPE_SARS2_in_vitro_Reactivity_top_53_percent_constrained.DBN	0.401414	0.669941	0.411101	0.686074	0.00728501		SARS_SF2_Mono_-1.ct	SHAPE_in_vivo_Incar_top_53_percent_constrained.DBN	0.41296	0.671566	0.417635	0.677117	0.00742268		SARS_SF2_Mono_-1.ct	Incar_DMS_invitro_Reactivities_top_53_percent_constrained.DBN	0.193697	0.334004	0.379458	0.759409	0.00780005		SARS_SF2_Mono_-1.ct	Pyle_SHAPE_SARS2_Reactivity_top_53_percent_constrained.DBN	0.447069	0.636371	0.448549	0.636666	0.00594558		SARS_SF2_Mono_-1.ct	Sun_Reactivities_top_53_percent_constrained.DBN	0.365832	0.745591	0.365832	0.745591	0.0082575
SARS_SF2_Mono_-1.ct	Rouskin_DMS_SARS2_Reactivity_top_54_percent_constrained.DBN	0.190869	0.352259	0.371826	0.795876	0.00786456		SARS_SF2_Mono_-1.ct	Incarnato_SHAPE_SARS2_in_vitro_Reactivity_top_54_percent_constrained.DBN	0.412548	0.677908	0.422504	0.694233	0.00791614		SARS_SF2_Mono_-1.ct	SHAPE_in_vivo_Incar_top_54_percent_constrained.DBN	0.422857	0.681467	0.427644	0.6871	0.00687714		SARS_SF2_Mono_-1.ct	Incar_DMS_invitro_Reactivities_top_54_percent_constrained.DBN	0.199293	0.337794	0.390421	0.768027	0.00842037		SARS_SF2_Mono_-1.ct	Pyle_SHAPE_SARS2_Reactivity_top_54_percent_constrained.DBN	0.45732	0.645962	0.458833	0.646262	0.00664635		SARS_SF2_Mono_-1.ct	Sun_Reactivities_top_54_percent_constrained.DBN	0.376907	0.754177	0.376907	0.754177	0.00835259
SARS_SF2_Mono_-1.ct	Rouskin_DMS_SARS2_Reactivity_top_55_percent_constrained.DBN	0.196591	0.355894	0.382971	0.804089	0.00896205		SARS_SF2_Mono_-1.ct	Incarnato_SHAPE_SARS2_in_vitro_Reactivity_top_55_percent_constrained.DBN	0.4238	0.685721	0.434027	0.702234	0.00809211		SARS_SF2_Mono_-1.ct	SHAPE_in_vivo_Incar_top_55_percent_constrained.DBN	0.432518	0.691677	0.437414	0.697395	0.00681399		SARS_SF2_Mono_-1.ct	Incar_DMS_invitro_Reactivities_top_55_percent_constrained.DBN	0.204477	0.342048	0.400577	0.7777	0.00789816		SARS_SF2_Mono_-1.ct	Pyle_SHAPE_SARS2_Reactivity_top_55_percent_constrained.DBN	0.466804	0.656637	0.468349	0.656942	0.00625141		SARS_SF2_Mono_-1.ct	Sun_Reactivities_top_55_percent_constrained.DBN	0.387865	0.762918	0.387865	0.762918	0.00835951
SARS_SF2_Mono_-1.ct	Rouskin_DMS_SARS2_Reactivity_top_56_percent_constrained.DBN	0.201958	0.359994	0.393428	0.813352	0.00850454		SARS_SF2_Mono_-1.ct	Incarnato_SHAPE_SARS2_in_vitro_Reactivity_top_56_percent_constrained.DBN	0.434345	0.694462	0.444827	0.711185	0.00768037		SARS_SF2_Mono_-1.ct	SHAPE_in_vivo_Incar_top_56_percent_constrained.DBN	0.442592	0.701346	0.447602	0.707144	0.00720415		SARS_SF2_Mono_-1.ct	Incar_DMS_invitro_Reactivities_top_56_percent_constrained.DBN	0.209661	0.34638	0.410733	0.787548	0.00799818		SARS_SF2_Mono_-1.ct	Pyle_SHAPE_SARS2_Reactivity_top_56_percent_constrained.DBN	0.476524	0.666925	0.478102	0.667234	0.0065071		SARS_SF2_Mono_-1.ct	Sun_Reactivities_top_56_percent_constrained.DBN	0.398704	0.771813	0.398704	0.771813	0.00836604
SARS_SF2_Mono_-1.ct	Rouskin_DMS_SARS2_Reactivity_top_57_percent_constrained.DBN	0.208505	0.362546	0.406182	0.819119	0.0104472		SARS_SF2_Mono_-1.ct	Incarnato_SHAPE_SARS2_in_vitro_Reactivity_top_57_percent_constrained.DBN	0.444948	0.703125	0.455686	0.720057	0.00781962		SARS_SF2_Mono_-1.ct	SHAPE_in_vivo_Incar_top_57_percent_constrained.DBN	0.453255	0.710241	0.458385	0.716113	0.00772216		SARS_SF2_Mono_-1.ct	Incar_DMS_invitro_Reactivities_top_57_percent_constrained.DBN	0.215493	0.349783	0.422158	0.795287	0.00908637		SARS_SF2_Mono_-1.ct	Pyle_SHAPE_SARS2_Reactivity_top_57_percent_constrained.DBN	0.486421	0.67698	0.488031	0.677295	0.00672531		SARS_SF2_Mono_-1.ct	Sun_Reactivities_top_57_percent_constrained.DBN	0.409485	0.780786	0.409485	0.780786	0.00841731
SARS_SF2_Mono_-1.ct	Rouskin_DMS_SARS2_Reactivity_top_58_percent_constrained.DBN	0.214404	0.36595	0.417672	0.826809	0.00950027		SARS_SF2_Mono_-1.ct	Incarnato_SHAPE_SARS2_in_vitro_Reactivity_top_58_percent_constrained.DBN	0.456377	0.710705	0.467391	0.72782	0.00851868		SARS_SF2_Mono_-1.ct	SHAPE_in_vivo_Incar_top_58_percent_constrained.DBN	0.464507	0.718363	0.469765	0.724302	0.00824198		SARS_SF2_Mono_-1.ct	Incar_DMS_invitro_Reactivities_top_58_percent_constrained.DBN	0.221031	0.353651	0.433006	0.80408	0.00872285		SARS_SF2_Mono_-1.ct	Pyle_SHAPE_SARS2_Reactivity_top_58_percent_constrained.DBN	0.495434	0.688274	0.497074	0.688593	0.00622701		SARS_SF2_Mono_-1.ct	Sun_Reactivities_top_58_percent_constrained.DBN	0.42109	0.788676	0.42109	0.788676	0.00915282
SARS_SF2_Mono_-1.ct	Rouskin_DMS_SARS2_Reactivity_top_59_percent_constrained.DBN	0.220479	0.369199	0.429507	0.834149	0.00987215		SARS_SF2_Mono_-1.ct	Incarnato_SHAPE_SARS2_in_vitro_Reactivity_top_59_percent_constrained.DBN	0.467747	0.718363	0.479035	0.735662	0.00856608		SARS_SF2_Mono_-1.ct	SHAPE_in_vivo_Incar_top_59_percent_constrained.DBN	0.474639	0.727955	0.480012	0.733973	0.0075212		SARS_SF2_Mono_-1.ct	Incar_DMS_invitro_Reactivities_top_59_percent_constrained.DBN	0.226745	0.357209	0.444201	0.81217	0.00909181		SARS_SF2_Mono_-1.ct	Pyle_SHAPE_SARS2_Reactivity_top_59_percent_constrained.DBN	0.503682	0.700495	0.505349	0.70082	0.00579909		SARS_SF2_Mono_-1.ct	Sun_Reactivities_top_59_percent_constrained.DBN	0.432401	0.796952	0.432401	0.796952	0.00901413
SARS_SF2_Mono_-1.ct	Rouskin_DMS_SARS2_Reactivity_top_60_percent_constrained.DBN	0.2262	0.372834	0.440653	0.842363	0.00938862		SARS_SF2_Mono_-1.ct	Incarnato_SHAPE_SARS2_in_vitro_Reactivity_top_60_percent_constrained.DBN	0.47894	0.726253	0.490498	0.743742	0.00852555		SARS_SF2_Mono_-1.ct	SHAPE_in_vivo_Incar_top_60_percent_constrained.DBN	0.485891	0.736077	0.491391	0.742162	0.00844521		SARS_SF2_Mono_-1.ct	Incar_DMS_invitro_Reactivities_top_60_percent_constrained.DBN	0.232401	0.360922	0.45528	0.820612	0.0090916		SARS_SF2_Mono_-1.ct	Pyle_SHAPE_SARS2_Reactivity_top_60_percent_constrained.DBN	0.512577	0.711943	0.514274	0.712274	0.00635695		SARS_SF2_Mono_-1.ct	Sun_Reactivities_top_60_percent_constrained.DBN	0.444183	0.80461	0.444183	0.80461	0.00947994
SARS_SF2_Mono_-1.ct	Rouskin_DMS_SARS2_Reactivity_top_61_percent_constrained.DBN	0.232688	0.375464	0.453292	0.848305	0.010722		SARS_SF2_Mono_-1.ct	Incarnato_SHAPE_SARS2_in_vitro_Reactivity_top_61_percent_constrained.DBN	0.488954	0.73569	0.500754	0.753406	0.00772724		SARS_SF2_Mono_-1.ct	SHAPE_in_vivo_Incar_top_61_percent_constrained.DBN	0.496554	0.744972	0.502175	0.751131	0.00809977		SARS_SF2_Mono_-1.ct	Incar_DMS_invitro_Reactivities_top_61_percent_constrained.DBN	0.238292	0.364248	0.466821	0.828174	0.0095577		SARS_SF2_Mono_-1.ct	Pyle_SHAPE_SARS2_Reactivity_top_61_percent_constrained.DBN	0.522651	0.721767	0.524381	0.722102	0.00729827		SARS_SF2_Mono_-1.ct	Sun_Reactivities_top_61_percent_constrained.DBN	0.455081	0.813428	0.455081	0.813428	0.00886505
SARS_SF2_Mono_-1.ct	Rouskin_DMS_SARS2_Reactivity_top_62_percent_constrained.DBN	0.238528	0.379022	0.464667	0.856344	0.00974124		SARS_SF2_Mono_-1.ct	Incarnato_SHAPE_SARS2_in_vitro_Reactivity_top_62_percent_constrained.DBN	0.500206	0.743502	0.512278	0.761407	0.00877398		SARS_SF2_Mono_-1.ct	SHAPE_in_vivo_Incar_top_62_percent_constrained.DBN	0.507334	0.753713	0.513077	0.759944	0.00828536		SARS_SF2_Mono_-1.ct	Incar_DMS_invitro_Reactivities_top_62_percent_constrained.DBN	0.243829	0.368116	0.477669	0.836968	0.00907963		SARS_SF2_Mono_-1.ct	Pyle_SHAPE_SARS2_Reactivity_top_62_percent_constrained.DBN	0.532489	0.7319	0.534251	0.73224	0.00722761		SARS_SF2_Mono_-1.ct	Sun_Reactivities_top_62_percent_constrained.DBN	0.467158	0.820699	0.467158	0.820699	0.00991124
SARS_SF2_Mono_-1.ct	Rouskin_DMS_SARS2_Reactivity_top_63_percent_constrained.DBN	0.244662	0.382116	0.476617	0.863334	0.0103168		SARS_SF2_Mono_-1.ct	Incarnato_SHAPE_SARS2_in_vitro_Reactivity_top_63_percent_constrained.DBN	0.511222	0.751624	0.52356	0.769724	0.00868407		SARS_SF2_Mono_-1.ct	SHAPE_in_vivo_Incar_top_63_percent_constrained.DBN	0.519116	0.761139	0.524993	0.767431	0.00914425		SARS_SF2_Mono_-1.ct	Incar_DMS_invitro_Reactivities_top_63_percent_constrained.DBN	0.249602	0.371597	0.488979	0.844882	0.00955551		SARS_SF2_Mono_-1.ct	Pyle_SHAPE_SARS2_Reactivity_top_63_percent_constrained.DBN	0.542209	0.742265	0.544004	0.74261	0.00724219		SARS_SF2_Mono_-1.ct	Sun_Reactivities_top_63_percent_constrained.DBN	0.479588	0.827506	0.479588	0.827506	0.0102859
SARS_SF2_Mono_-1.ct	Rouskin_DMS_SARS2_Reactivity_top_64_percent_constrained.DBN	0.251268	0.384592	0.489486	0.868927	0.0111823		SARS_SF2_Mono_-1.ct	Incarnato_SHAPE_SARS2_in_vitro_Reactivity_top_64_percent_constrained.DBN	0.522474	0.759437	0.535083	0.777725	0.00896202		SARS_SF2_Mono_-1.ct	SHAPE_in_vivo_Incar_top_64_percent_constrained.DBN	0.529779	0.770034	0.535776	0.7764	0.00837226		SARS_SF2_Mono_-1.ct	Incar_DMS_invitro_Reactivities_top_64_percent_constrained.DBN	0.255729	0.374691	0.500981	0.851917	0.010225		SARS_SF2_Mono_-1.ct	Pyle_SHAPE_SARS2_Reactivity_top_64_percent_constrained.DBN	0.553166	0.750928	0.554997	0.751277	0.00825921		SARS_SF2_Mono_-1.ct	Sun_Reactivities_top_64_percent_constrained.DBN	0.492018	0.834313	0.492018	0.834313	0.0103705
SARS_SF2_Mono_-1.ct	Rouskin_DMS_SARS2_Reactivity_top_65_percent_constrained.DBN	0.257815	0.387144	0.502241	0.874694	0.011156		SARS_SF2_Mono_-1.ct	Incarnato_SHAPE_SARS2_in_vitro_Reactivity_top_65_percent_constrained.DBN	0.533549	0.767481	0.546425	0.785963	0.0089147		SARS_SF2_Mono_-1.ct	SHAPE_in_vivo_Incar_top_65_percent_constrained.DBN	0.540619	0.778775	0.546738	0.785213	0.00860764		SARS_SF2_Mono_-1.ct	Incar_DMS_invitro_Reactivities_top_65_percent_constrained.DBN	0.26215	0.377321	0.51356	0.857897	0.0107918		SARS_SF2_Mono_-1.ct	Pyle_SHAPE_SARS2_Reactivity_top_65_percent_constrained.DBN	0.563004	0.761139	0.564868	0.761492	0.00751635		SARS_SF2_Mono_-1.ct	Sun_Reactivities_top_65_percent_constrained.DBN	0.504801	0.840656	0.504801	0.840656	0.0107465
SARS_SF2_Mono_-1.ct	Rouskin_DMS_SARS2_Reactivity_top_66_percent_constrained.DBN	0.26448	0.389542	0.515225	0.880112	0.0114274		SARS_SF2_Mono_-1.ct	Incarnato_SHAPE_SARS2_in_vitro_Reactivity_top_66_percent_constrained.DBN	0.544683	0.775449	0.557828	0.794122	0.00905515		SARS_SF2_Mono_-1.ct	SHAPE_in_vivo_Incar_top_66_percent_constrained.DBN	0.551399	0.787515	0.557641	0.794026	0.00865694		SARS_SF2_Mono_-1.ct	Incar_DMS_invitro_Reactivities_top_66_percent_constrained.DBN	0.268866	0.379641	0.526717	0.863173	0.0113562		SARS_SF2_Mono_-1.ct	Pyle_SHAPE_SARS2_Reactivity_top_66_percent_constrained.DBN	0.573137	0.770885	0.575034	0.771243	0.00784052		SARS_SF2_Mono_-1.ct	Sun_Reactivities_top_66_percent_constrained.DBN	0.51729	0.847386	0.51729	0.847386	0.010583
SARS_SF2_Mono_-1.ct	Rouskin_DMS_SARS2_Reactivity_top_67_percent_constrained.DBN	0.270674	0.392636	0.527289	0.887102	0.0107027		SARS_SF2_Mono_-1.ct	Incarnato_SHAPE_SARS2_in_vitro_Reactivity_top_67_percent_constrained.DBN	0.555464	0.78388	0.568869	0.802757	0.00886301		SARS_SF2_Mono_-1.ct	SHAPE_in_vivo_Incar_top_67_percent_constrained.DBN	0.562651	0.795637	0.56902	0.802215	0.00912857		SARS_SF2_Mono_-1.ct	Incar_DMS_invitro_Reactivities_top_67_percent_constrained.DBN	0.274875	0.382812	0.538488	0.870383	0.0102457		SARS_SF2_Mono_-1.ct	Pyle_SHAPE_SARS2_Reactivity_top_67_percent_constrained.DBN	0.583682	0.78009	0.585614	0.780452	0.00825704		SARS_SF2_Mono_-1.ct	Sun_Reactivities_top_67_percent_constrained.DBN	0.530015	0.853806	0.530015	0.853806	0.0108643
SARS_SF2_Mono_-1.ct	Rouskin_DMS_SARS2_Reactivity_top_68_percent_constrained.DBN	0.277221	0.395189	0.540044	0.89287	0.0113879		SARS_SF2_Mono_-1.ct	Incarnato_SHAPE_SARS2_in_vitro_Reactivity_top_68_percent_constrained.DBN	0.566598	0.791847	0.580271	0.810916	0.00924664		SARS_SF2_Mono_-1.ct	SHAPE_in_vivo_Incar_top_68_percent_constrained.DBN	0.574963	0.802367	0.581472	0.809	0.0100733		SARS_SF2_Mono_-1.ct	Incar_DMS_invitro_Reactivities_top_68_percent_constrained.DBN	0.281178	0.385675	0.550837	0.876891	0.0108283		SARS_SF2_Mono_-1.ct	Pyle_SHAPE_SARS2_Reactivity_top_68_percent_constrained.DBN	0.594227	0.789372	0.596194	0.789738	0.00835529		SARS_SF2_Mono_-1.ct	Sun_Reactivities_top_68_percent_constrained.DBN	0.543387	0.859375	0.543387	0.859375	0.0114921
SARS_SF2_Mono_-1.ct	Rouskin_DMS_SARS2_Reactivity_top_69_percent_constrained.DBN	0.283532	0.398051	0.552338	0.899336	0.011057		SARS_SF2_Mono_-1.ct	Incarnato_SHAPE_SARS2_in_vitro_Reactivity_top_69_percent_constrained.DBN	0.579087	0.798035	0.593062	0.817253	0.0104529		SARS_SF2_Mono_-1.ct	SHAPE_in_vivo_Incar_top_69_percent_constrained.DBN	0.58592	0.810876	0.592553	0.817579	0.00905986		SARS_SF2_Mono_-1.ct	Incar_DMS_invitro_Reactivities_top_69_percent_constrained.DBN	0.287835	0.387995	0.563878	0.882167	0.0115043		SARS_SF2_Mono_-1.ct	Pyle_SHAPE_SARS2_Reactivity_top_69_percent_constrained.DBN	0.604948	0.798345	0.606951	0.798715	0.00859189		SARS_SF2_Mono_-1.ct	Sun_Reactivities_top_69_percent_constrained.DBN	0.555935	0.866027	0.555935	0.866027	0.0108668
SARS_SF2_Mono_-1.ct	Rouskin_DMS_SARS2_Reactivity_top_70_percent_constrained.DBN	0.290315	0.400371	0.565552	0.904579	0.011953		SARS_SF2_Mono_-1.ct	Incarnato_SHAPE_SARS2_in_vitro_Reactivity_top_70_percent_constrained.DBN	0.590692	0.805384	0.604947	0.824778	0.00980279		SARS_SF2_Mono_-1.ct	SHAPE_in_vivo_Incar_top_70_percent_constrained.DBN	0.597703	0.818301	0.604468	0.825066	0.009831		SARS_SF2_Mono_-1.ct	Incar_DMS_invitro_Reactivities_top_70_percent_constrained.DBN	0.293962	0.391089	0.57588	0.889202	0.0106725		SARS_SF2_Mono_-1.ct	Pyle_SHAPE_SARS2_Reactivity_top_70_percent_constrained.DBN	0.615199	0.808014	0.617235	0.808389	0.00831371		SARS_SF2_Mono_-1.ct	Sun_Reactivities_top_70_percent_constrained.DBN	0.56866	0.872447	0.56866	0.872447	0.0111015
SARS_SF2_Mono_-1.ct	Rouskin_DMS_SARS2_Reactivity_top_71_percent_constrained.DBN	0.297039	0.402692	0.578651	0.909822	0.0119177		SARS_SF2_Mono_-1.ct	Incarnato_SHAPE_SARS2_in_vitro_Reactivity_top_71_percent_constrained.DBN	0.602592	0.812345	0.617134	0.831907	0.0101385		SARS_SF2_Mono_-1.ct	SHAPE_in_vivo_Incar_top_71_percent_constrained.DBN	0.608895	0.826501	0.615788	0.833333	0.00943303		SARS_SF2_Mono_-1.ct	Incar_DMS_invitro_Reactivities_top_71_percent_constrained.DBN	0.300619	0.39341	0.588921	0.894478	0.0116649		SARS_SF2_Mono_-1.ct	Pyle_SHAPE_SARS2_Reactivity_top_71_percent_constrained.DBN	0.625037	0.818147	0.627106	0.818527	0.00807932		SARS_SF2_Mono_-1.ct	Sun_Reactivities_top_71_percent_constrained.DBN	0.581973	0.878094	0.581973	0.878094	0.0116907
SARS_SF2_Mono_-1.ct	Rouskin_DMS_SARS2_Reactivity_top_72_percent_constrained.DBN	0.304117	0.404548	0.592439	0.914016	0.0126028		SARS_SF2_Mono_-1.ct	Incarnato_SHAPE_SARS2_in_vitro_Reactivity_top_72_percent_constrained.DBN	0.615022	0.818611	0.629864	0.838324	0.0106719		SARS_SF2_Mono_-1.ct	SHAPE_in_vivo_Incar_top_72_percent_constrained.DBN	0.620677	0.833926	0.627703	0.84082	0.0100187		SARS_SF2_Mono_-1.ct	Incar_DMS_invitro_Reactivities_top_72_percent_constrained.DBN	0.30757	0.395421	0.602539	0.89905	0.0122433		SARS_SF2_Mono_-1.ct	Pyle_SHAPE_SARS2_Reactivity_top_72_percent_constrained.DBN	0.635464	0.827584	0.637567	0.827968	0.00866188		SARS_SF2_Mono_-1.ct	Sun_Reactivities_top_72_percent_constrained.DBN	0.594934	0.884205	0.594934	0.884205	0.0114595
SARS_SF2_Mono_-1.ct	Rouskin_DMS_SARS2_Reactivity_top_73_percent_constrained.DBN	0.310782	0.406946	0.605423	0.919434	0.011938		SARS_SF2_Mono_-1.ct	Incarnato_SHAPE_SARS2_in_vitro_Reactivity_top_73_percent_constrained.DBN	0.626981	0.825495	0.642112	0.845374	0.0103536		SARS_SF2_Mono_-1.ct	SHAPE_in_vivo_Incar_top_73_percent_constrained.DBN	0.632224	0.841662	0.63938	0.84862	0.00990941		SARS_SF2_Mono_-1.ct	Incar_DMS_invitro_Reactivities_top_73_percent_constrained.DBN	0.313697	0.398438	0.614541	0.905909	0.010873		SARS_SF2_Mono_-1.ct	Pyle_SHAPE_SARS2_Reactivity_top_73_percent_constrained.DBN	0.646362	0.836324	0.648502	0.836713	0.00914899		SARS_SF2_Mono_-1.ct	Sun_Reactivities_top_73_percent_constrained.DBN	0.608189	0.889929	0.608189	0.889929	0.0117958
SARS_SF2_Mono_-1.ct	Rouskin_DMS_SARS2_Reactivity_top_74_percent_constrained.DBN	0.317742	0.408957	0.618982	0.923978	0.0125278		SARS_SF2_Mono_-1.ct	Incarnato_SHAPE_SARS2_in_vitro_Reactivity_top_74_percent_constrained.DBN	0.639293	0.831915	0.654721	0.851949	0.0107425		SARS_SF2_Mono_-1.ct	SHAPE_in_vivo_Incar_top_74_percent_constrained.DBN	0.644595	0.848314	0.651892	0.855327	0.0107011		SARS_SF2_Mono_-1.ct	Incar_DMS_invitro_Reactivities_top_74_percent_constrained.DBN	0.320589	0.400526	0.628044	0.910658	0.0122962		SARS_SF2_Mono_-1.ct	Pyle_SHAPE_SARS2_Reactivity_top_74_percent_constrained.DBN	0.657909	0.844214	0.660086	0.844606	0.00978443		SARS_SF2_Mono_-1.ct	Sun_Reactivities_top_74_percent_constrained.DBN	0.621502	0.895575	0.621502	0.895575	0.0119234
SARS_SF2_Mono_-1.ct	Rouskin_DMS_SARS2_Reactivity_top_75_percent_constrained.DBN	0.324938	0.410736	0.633	0.927997	0.0130088		SARS_SF2_Mono_-1.ct	Incarnato_SHAPE_SARS2_in_vitro_Reactivity_top_75_percent_constrained.DBN	0.650781	0.839418	0.666486	0.859632	0.0101133		SARS_SF2_Mono_-1.ct	SHAPE_in_vivo_Incar_top_75_percent_constrained.DBN	0.65732	0.854502	0.66476	0.861566	0.0110872		SARS_SF2_Mono_-1.ct	Incar_DMS_invitro_Reactivities_top_75_percent_constrained.DBN	0.327835	0.402073	0.642239	0.914175	0.0129768		SARS_SF2_Mono_-1.ct	Pyle_SHAPE_SARS2_Reactivity_top_75_percent_constrained.DBN	0.669396	0.852259	0.671612	0.852654	0.00982727		SARS_SF2_Mono_-1.ct	Sun_Reactivities_top_75_percent_constrained.DBN	0.635287	0.900603	0.635287	0.900603	0.0124148
SARS_SF2_Mono_-1.ct	Rouskin_DMS_SARS2_Reactivity_top_76_percent_constrained.DBN	0.331721	0.41298	0.646214	0.933065	0.0123294		SARS_SF2_Mono_-1.ct	Incarnato_SHAPE_SARS2_in_vitro_Reactivity_top_76_percent_constrained.DBN	0.661856	0.847463	0.677828	0.867871	0.00984372		SARS_SF2_Mono_-1.ct	SHAPE_in_vivo_Incar_top_76_percent_constrained.DBN	0.669691	0.861154	0.677271	0.868273	0.0108631		SARS_SF2_Mono_-1.ct	Incar_DMS_invitro_Reactivities_top_76_percent_constrained.DBN	0.334551	0.404394	0.655395	0.919451	0.0120966		SARS_SF2_Mono_-1.ct	Pyle_SHAPE_SARS2_Reactivity_top_76_percent_constrained.DBN	0.680059	0.861309	0.68231	0.861709	0.00921859		SARS_SF2_Mono_-1.ct	Sun_Reactivities_top_76_percent_constrained.DBN	0.649367	0.905244	0.649367	0.905244	0.0127454
SARS_SF2_Mono_-1.ct	Rouskin_DMS_SARS2_Reactivity_top_77_percent_constrained.DBN	0.33874	0.414913	0.659887	0.937434	0.012818		SARS_SF2_Mono_-1.ct	Incarnato_SHAPE_SARS2_in_vitro_Reactivity_top_77_percent_constrained.DBN	0.673638	0.854579	0.689894	0.875158	0.01056		SARS_SF2_Mono_-1.ct	SHAPE_in_vivo_Incar_top_77_percent_constrained.DBN	0.68218	0.867652	0.689902	0.874825	0.0110493		SARS_SF2_Mono_-1.ct	Incar_DMS_invitro_Reactivities_top_77_percent_constrained.DBN	0.341208	0.406714	0.668436	0.924727	0.0120593		SARS_SF2_Mono_-1.ct	Pyle_SHAPE_SARS2_Reactivity_top_77_percent_constrained.DBN	0.691429	0.869508	0.693717	0.869912	0.00992334		SARS_SF2_Mono_-1.ct	Sun_Reactivities_top_77_percent_constrained.DBN	0.663623	0.909653	0.663623	0.909653	0.0129683
SARS_SF2_Mono_-1.ct	Rouskin_DMS_SARS2_Reactivity_top_78_percent_constrained.DBN	0.346113	0.41646	0.67425	0.94093	0.0135144		SARS_SF2_Mono_-1.ct	Incarnato_SHAPE_SARS2_in_vitro_Reactivity_top_78_percent_constrained.DBN	0.686009	0.860922	0.702564	0.881654	0.0111703		SARS_SF2_Mono_-1.ct	SHAPE_in_vivo_Incar_top_78_percent_constrained.DBN	0.694374	0.874536	0.702234	0.881766	0.0108743		SARS_SF2_Mono_-1.ct	Incar_DMS_invitro_Reactivities_top_78_percent_constrained.DBN	0.348395	0.408416	0.682516	0.928597	0.0130743		SARS_SF2_Mono_-1.ct	Pyle_SHAPE_SARS2_Reactivity_top_78_percent_constrained.DBN	0.702739	0.877707	0.705065	0.878115	0.00996501		SARS_SF2_Mono_-1.ct	Sun_Reactivities_top_78_percent_constrained.DBN	0.677526	0.914527	0.677526	0.914527	0.0127145
SARS_SF2_Mono_-1.ct	Rouskin_DMS_SARS2_Reactivity_top_79_percent_constrained.DBN	0.353309	0.418162	0.688268	0.944775	0.013244		SARS_SF2_Mono_-1.ct	Incarnato_SHAPE_SARS2_in_vitro_Reactivity_top_79_percent_constrained.DBN	0.698027	0.867729	0.714872	0.888625	0.0109369		SARS_SF2_Mono_-1.ct	SHAPE_in_vivo_Incar_top_79_percent_constrained.DBN	0.706863	0.881111	0.714864	0.888395	0.0112207		SARS_SF2_Mono_-1.ct	Incar_DMS_invitro_Reactivities_top_79_percent_constrained.DBN	0.354993	0.410814	0.695441	0.934049	0.0120731		SARS_SF2_Mono_-1.ct	Pyle_SHAPE_SARS2_Reactivity_top_79_percent_constrained.DBN	0.713814	0.886216	0.716177	0.886627	0.009852		SARS_SF2_Mono_-1.ct	Sun_Reactivities_top_79_percent_constrained.DBN	0.691016	0.919941	0.691016	0.919941	0.0124104
SARS_SF2_Mono_-1.ct	Rouskin_DMS_SARS2_Reactivity_top_80_percent_constrained.DBN	0.360564	0.419787	0.702401	0.948445	0.0134044		SARS_SF2_Mono_-1.ct	Incarnato_SHAPE_SARS2_in_vitro_Reactivity_top_80_percent_constrained.DBN	0.710398	0.874072	0.727541	0.89512	0.0113409		SARS_SF2_Mono_-1.ct	SHAPE_in_vivo_Incar_top_80_percent_constrained.DBN	0.719293	0.887686	0.727435	0.895024	0.0112511		SARS_SF2_Mono_-1.ct	Incar_DMS_invitro_Reactivities_top_80_percent_constrained.DBN	0.361237	0.413753	0.707675	0.940732	0.0115081		SARS_SF2_Mono_-1.ct	Pyle_SHAPE_SARS2_Reactivity_top_80_percent_constrained.DBN	0.724595	0.895189	0.726993	0.895604	0.00968707		SARS_SF2_Mono_-1.ct	Sun_Reactivities_top_80_percent_constrained.DBN	0.704153	0.92582	0.704153	0.92582	0.0121625
SARS_SF2_Mono_-1.ct	Rouskin_DMS_SARS2_Reactivity_top_81_percent_constrained.DBN	0.368291	0.420792	0.717454	0.950717	0.0143105		SARS_SF2_Mono_-1.ct	Incarnato_SHAPE_SARS2_in_vitro_Reactivity_top_81_percent_constrained.DBN	0.723063	0.880028	0.740513	0.90122	0.01169		SARS_SF2_Mono_-1.ct	SHAPE_in_vivo_Incar_top_81_percent_constrained.DBN	0.73243	0.893332	0.740721	0.900718	0.0119666		SARS_SF2_Mono_-1.ct	Incar_DMS_invitro_Reactivities_top_81_percent_constrained.DBN	0.367835	0.416151	0.7206	0.946184	0.01223		SARS_SF2_Mono_-1.ct	Pyle_SHAPE_SARS2_Reactivity_top_81_percent_constrained.DBN	0.736907	0.902073	0.739346	0.902492	0.0111485		SARS_SF2_Mono_-1.ct	Sun_Reactivities_top_81_percent_constrained.DBN	0.718409	0.930229	0.718409	0.930229	0.0132616
SARS_SF2_Mono_-1.ct	Rouskin_DMS_SARS2_Reactivity_top_82_percent_constrained.DBN	0.375487	0.422494	0.731472	0.954561	0.0133812		SARS_SF2_Mono_-1.ct	Incarnato_SHAPE_SARS2_in_vitro_Reactivity_top_82_percent_constrained.DBN	0.735258	0.886603	0.753002	0.907953	0.0113391		SARS_SF2_Mono_-1.ct	SHAPE_in_vivo_Incar_top_82_percent_constrained.DBN	0.744683	0.900139	0.753113	0.907581	0.0112468		SARS_SF2_Mono_-1.ct	Incar_DMS_invitro_Reactivities_top_82_percent_constrained.DBN	0.375611	0.417079	0.735834	0.948294	0.014446		SARS_SF2_Mono_-1.ct	Pyle_SHAPE_SARS2_Reactivity_top_82_percent_constrained.DBN	0.749396	0.908803	0.751877	0.909225	0.0113928		SARS_SF2_Mono_-1.ct	Sun_Reactivities_top_82_percent_constrained.DBN	0.732312	0.935102	0.732312	0.935102	0.0130005
SARS_SF2_Mono_-1.ct	Rouskin_DMS_SARS2_Reactivity_top_83_percent_constrained.DBN	0.38286	0.424041	0.745835	0.958057	0.0137604		SARS_SF2_Mono_-1.ct	Incarnato_SHAPE_SARS2_in_vitro_Reactivity_top_83_percent_constrained.DBN	0.747982	0.892481	0.766033	0.913973	0.0119106		SARS_SF2_Mono_-1.ct	SHAPE_in_vivo_Incar_top_83_percent_constrained.DBN	0.757761	0.905863	0.766339	0.913352	0.0120801		SARS_SF2_Mono_-1.ct	Incar_DMS_invitro_Reactivities_top_83_percent_constrained.DBN	0.382975	0.418472	0.75026	0.95146	0.0137256		SARS_SF2_Mono_-1.ct	Pyle_SHAPE_SARS2_Reactivity_top_83_percent_constrained.DBN	0.761649	0.915764	0.76417	0.916189	0.0112635		SARS_SF2_Mono_-1.ct	Sun_Reactivities_top_83_percent_constrained.DBN	0.745685	0.940671	0.745685	0.940671	0.0125792
SARS_SF2_Mono_-1.ct	Rouskin_DMS_SARS2_Reactivity_top_84_percent_constrained.DBN	0.390409	0.425278	0.760542	0.960853	0.0141318		SARS_SF2_Mono_-1.ct	Incarnato_SHAPE_SARS2_in_vitro_Reactivity_top_84_percent_constrained.DBN	0.761001	0.897973	0.779367	0.919598	0.0122613		SARS_SF2_Mono_-1.ct	SHAPE_in_vivo_Incar_top_84_percent_constrained.DBN	0.770722	0.911742	0.779446	0.919279	0.0120489		SARS_SF2_Mono_-1.ct	Incar_DMS_invitro_Reactivities_top_84_percent_constrained.DBN	0.390103	0.420251	0.764224	0.955505	0.0133429		SARS_SF2_Mono_-1.ct	Pyle_SHAPE_SARS2_Reactivity_top_84_percent_constrained.DBN	0.774138	0.922416	0.776701	0.922845	0.0115635		SARS_SF2_Mono_-1.ct	Sun_Reactivities_top_84_percent_constrained.DBN	0.759529	0.945699	0.759529	0.945699	0.0130922
SARS_SF2_Mono_-1.ct	Rouskin_DMS_SARS2_Reactivity_top_85_percent_constrained.DBN	0.398372	0.425975	0.776054	0.962426	0.014929		SARS_SF2_Mono_-1.ct	Incarnato_SHAPE_SARS2_in_vitro_Reactivity_top_85_percent_constrained.DBN	0.773373	0.904316	0.792036	0.926093	0.0117333		SARS_SF2_Mono_-1.ct	SHAPE_in_vivo_Incar_top_85_percent_constrained.DBN	0.784035	0.917157	0.79291	0.924739	0.0124511		SARS_SF2_Mono_-1.ct	Incar_DMS_invitro_Reactivities_top_85_percent_constrained.DBN	0.397526	0.421566	0.778765	0.958495	0.0139377		SARS_SF2_Mono_-1.ct	Pyle_SHAPE_SARS2_Reactivity_top_85_percent_constrained.DBN	0.786627	0.929146	0.789231	0.929577	0.0116479		SARS_SF2_Mono_-1.ct	Sun_Reactivities_top_85_percent_constrained.DBN	0.773785	0.950108	0.773785	0.950108	0.013545
SARS_SF2_Mono_-1.ct	Rouskin_DMS_SARS2_Reactivity_top_86_percent_constrained.DBN	0.405981	0.427212	0.790877	0.965222	0.014307		SARS_SF2_Mono_-1.ct	Incarnato_SHAPE_SARS2_in_vitro_Reactivity_top_86_percent_constrained.DBN	0.785979	0.91035	0.804947	0.932272	0.0120366		SARS_SF2_Mono_-1.ct	SHAPE_in_vivo_Incar_top_86_percent_constrained.DBN	0.797231	0.922726	0.806256	0.930354	0.0124158		SARS_SF2_Mono_-1.ct	Incar_DMS_invitro_Reactivities_top_86_percent_constrained.DBN	0.405066	0.422803	0.793537	0.961308	0.0142005		SARS_SF2_Mono_-1.ct	Pyle_SHAPE_SARS2_Reactivity_top_86_percent_constrained.DBN	0.799705	0.935025	0.802352	0.935459	0.0122745		SARS_SF2_Mono_-1.ct	Sun_Reactivities_top_86_percent_constrained.DBN	0.787923	0.954672	0.787923	0.954672	0.0134976
SARS_SF2_Mono_-1.ct	Rouskin_DMS_SARS2_Reactivity_top_87_percent_constrained.DBN	0.413295	0.428759	0.805125	0.968717	0.0138022		SARS_SF2_Mono_-1.ct	Incarnato_SHAPE_SARS2_in_vitro_Reactivity_top_87_percent_constrained.DBN	0.799057	0.915764	0.818341	0.937817	0.0125608		SARS_SF2_Mono_-1.ct	SHAPE_in_vivo_Incar_top_87_percent_constrained.DBN	0.809956	0.928914	0.819124	0.936593	0.0120527		SARS_SF2_Mono_-1.ct	Incar_DMS_invitro_Reactivities_top_87_percent_constrained.DBN	0.412253	0.424428	0.807617	0.965002	0.0135869		SARS_SF2_Mono_-1.ct	Pyle_SHAPE_SARS2_Reactivity_top_87_percent_constrained.DBN	0.813314	0.940285	0.816006	0.940721	0.0128439		SARS_SF2_Mono_-1.ct	Sun_Reactivities_top_87_percent_constrained.DBN	0.802474	0.958694	0.802474	0.958694	0.0139498
SARS_SF2_Mono_-1.ct	Rouskin_DMS_SARS2_Reactivity_top_88_percent_constrained.DBN	0.420963	0.429842	0.820062	0.971164	0.0145066		SARS_SF2_Mono_-1.ct	Incarnato_SHAPE_SARS2_in_vitro_Reactivity_top_88_percent_constrained.DBN	0.812371	0.920869	0.831976	0.943045	0.0128584		SARS_SF2_Mono_-1.ct	SHAPE_in_vivo_Incar_top_88_percent_constrained.DBN	0.822739	0.935025	0.832052	0.942755	0.0121881		SARS_SF2_Mono_-1.ct	Incar_DMS_invitro_Reactivities_top_88_percent_constrained.DBN	0.419558	0.425975	0.821927	0.968519	0.0138599		SARS_SF2_Mono_-1.ct	Pyle_SHAPE_SARS2_Reactivity_top_88_percent_constrained.DBN	0.82592	0.946782	0.828654	0.947222	0.0119809		SARS_SF2_Mono_-1.ct	Sun_Reactivities_top_88_percent_constrained.DBN	0.817614	0.961943	0.817614	0.961943	0.0145637
SARS_SF2_Mono_-1.ct	Rouskin_DMS_SARS2_Reactivity_top_89_percent_constrained.DBN	0.428335	0.431312	0.834425	0.974484	0.0139964		SARS_SF2_Mono_-1.ct	Incarnato_SHAPE_SARS2_in_vitro_Reactivity_top_89_percent_constrained.DBN	0.824801	0.927135	0.844706	0.949461	0.0120867		SARS_SF2_Mono_-1.ct	SHAPE_in_vivo_Incar_top_89_percent_constrained.DBN	0.835641	0.940981	0.8451	0.94876	0.0123788		SARS_SF2_Mono_-1.ct	Incar_DMS_invitro_Reactivities_top_89_percent_constrained.DBN	0.426863	0.427444	0.836238	0.971861	0.0139078		SARS_SF2_Mono_-1.ct	Pyle_SHAPE_SARS2_Reactivity_top_89_percent_constrained.DBN	0.839057	0.952584	0.841835	0.953026	0.0125613		SARS_SF2_Mono_-1.ct	Sun_Reactivities_top_89_percent_constrained.DBN	0.832813	0.965114	0.832813	0.965114	0.0146686
SARS_SF2_Mono_-1.ct	Rouskin_DMS_SARS2_Reactivity_top_90_percent_constrained.DBN	0.436062	0.432317	0.849477	0.976756	0.0147024		SARS_SF2_Mono_-1.ct	Incarnato_SHAPE_SARS2_in_vitro_Reactivity_top_90_percent_constrained.DBN	0.838174	0.932163	0.858401	0.95461	0.0130737		SARS_SF2_Mono_-1.ct	SHAPE_in_vivo_Incar_top_90_percent_constrained.DBN	0.849897	0.945158	0.859517	0.952971	0.0137396		SARS_SF2_Mono_-1.ct	Incar_DMS_invitro_Reactivities_top_90_percent_constrained.DBN	0.434286	0.428837	0.850779	0.975026	0.0141781		SARS_SF2_Mono_-1.ct	Pyle_SHAPE_SARS2_Reactivity_top_90_percent_constrained.DBN	0.852666	0.957843	0.855488	0.958288	0.0130838		SARS_SF2_Mono_-1.ct	Sun_Reactivities_top_90_percent_constrained.DBN	0.847835	0.968518	0.847835	0.968518	0.0145492
SARS_SF2_Mono_-1.ct	Rouskin_DMS_SARS2_Reactivity_top_91_percent_constrained.DBN	0.443553	0.43371	0.86407	0.979902	0.0142994		SARS_SF2_Mono_-1.ct	Incarnato_SHAPE_SARS2_in_vitro_Reactivity_top_91_percent_constrained.DBN	0.85137	0.937423	0.871916	0.959997	0.0129737		SARS_SF2_Mono_-1.ct	SHAPE_in_vivo_Incar_top_91_percent_constrained.DBN	0.863387	0.95034	0.873161	0.958197	0.0130728		SARS_SF2_Mono_-1.ct	Incar_DMS_invitro_Reactivities_top_91_percent_constrained.DBN	0.441885	0.42992	0.865666	0.977489	0.0145523		SARS_SF2_Mono_-1.ct	Pyle_SHAPE_SARS2_Reactivity_top_91_percent_constrained.DBN	0.866156	0.963181	0.869023	0.963628	0.0130428		SARS_SF2_Mono_-1.ct	Sun_Reactivities_top_91_percent_constrained.DBN	0.862798	0.971999	0.862798	0.971999	0.0145442
SARS_SF2_Mono_-1.ct	Rouskin_DMS_SARS2_Reactivity_top_92_percent_constrained.DBN	0.450926	0.435179	0.878433	0.983223	0.0141219		SARS_SF2_Mono_-1.ct	Incarnato_SHAPE_SARS2_in_vitro_Reactivity_top_92_percent_constrained.DBN	0.864271	0.943069	0.885128	0.965779	0.0127605		SARS_SF2_Mono_-1.ct	SHAPE_in_vivo_Incar_top_92_percent_constrained.DBN	0.876583	0.95591	0.886506	0.963812	0.0128623		SARS_SF2_Mono_-1.ct	Incar_DMS_invitro_Reactivities_top_92_percent_constrained.DBN	0.449543	0.431002	0.880669	0.979951	0.0147021		SARS_SF2_Mono_-1.ct	Pyle_SHAPE_SARS2_Reactivity_top_92_percent_constrained.DBN	0.880059	0.968054	0.882972	0.968503	0.0135095		SARS_SF2_Mono_-1.ct	Sun_Reactivities_top_92_percent_constrained.DBN	0.877761	0.97548	0.877761	0.97548	0.0145963
SARS_SF2_Mono_-1.ct	Rouskin_DMS_SARS2_Reactivity_top_93_percent_constrained.DBN	0.458476	0.436417	0.89314	0.986019	0.0145019		SARS_SF2_Mono_-1.ct	Incarnato_SHAPE_SARS2_in_vitro_Reactivity_top_93_percent_constrained.DBN	0.877761	0.947942	0.898944	0.97077	0.0134121		SARS_SF2_Mono_-1.ct	SHAPE_in_vivo_Incar_top_93_percent_constrained.DBN	0.889485	0.961943	0.899553	0.969895	0.0126546		SARS_SF2_Mono_-1.ct	Incar_DMS_invitro_Reactivities_top_93_percent_constrained.DBN	0.457261	0.431931	0.895788	0.982061	0.0148471		SARS_SF2_Mono_-1.ct	Pyle_SHAPE_SARS2_Reactivity_top_93_percent_constrained.DBN	0.894904	0.971612	0.897866	0.972063	0.0144784		SARS_SF2_Mono_-1.ct	Sun_Reactivities_top_93_percent_constrained.DBN	0.892666	0.979038	0.892666	0.979038	0.0145918
SARS_SF2_Mono_-1.ct	Rouskin_DMS_SARS2_Reactivity_top_94_percent_constrained.DBN	0.46638	0.437268	0.908537	0.987941	0.0152113		SARS_SF2_Mono_-1.ct	Incarnato_SHAPE_SARS2_in_vitro_Reactivity_top_94_percent_constrained.DBN	0.89137	0.952661	0.912881	0.975602	0.0135966		SARS_SF2_Mono_-1.ct	SHAPE_in_vivo_Incar_top_94_percent_constrained.DBN	0.902975	0.967126	0.913196	0.975121	0.0133037		SARS_SF2_Mono_-1.ct	Incar_DMS_invitro_Reactivities_top_94_percent_constrained.DBN	0.464919	0.433014	0.910791	0.984523	0.0147707		SARS_SF2_Mono_-1.ct	Pyle_SHAPE_SARS2_Reactivity_top_94_percent_constrained.DBN	0.909161	0.976021	0.91217	0.976474	0.0139669		SARS_SF2_Mono_-1.ct	Sun_Reactivities_top_94_percent_constrained.DBN	0.907629	0.982519	0.907629	0.982519	0.0147016
SARS_SF2_Mono_-1.ct	Rouskin_DMS_SARS2_Reactivity_top_95_percent_constrained.DBN	0.474342	0.437964	0.924049	0.989514	0.0153492		SARS_SF2_Mono_-1.ct	Incarnato_SHAPE_SARS2_in_vitro_Reactivity_top_95_percent_constrained.DBN	0.905331	0.956915	0.927179	0.979959	0.0140121		SARS_SF2_Mono_-1.ct	SHAPE_in_vivo_Incar_top_95_percent_constrained.DBN	0.916996	0.971612	0.927376	0.979644	0.0138907		SARS_SF2_Mono_-1.ct	Incar_DMS_invitro_Reactivities_top_95_percent_constrained.DBN	0.472342	0.434329	0.925332	0.987513	0.0143597		SARS_SF2_Mono_-1.ct	Pyle_SHAPE_SARS2_Reactivity_top_95_percent_constrained.DBN	0.923122	0.980739	0.926178	0.981195	0.0137445		SARS_SF2_Mono_-1.ct	Sun_Reactivities_top_95_percent_constrained.DBN	0.923181	0.985226	0.923181	0.985226	0.0153225
SARS_SF2_Mono_-1.ct	Rouskin_DMS_SARS2_Reactivity_top_96_percent_constrained.DBN	0.48201	0.439047	0.938987	0.991961	0.0148173		SARS_SF2_Mono_-1.ct	Incarnato_SHAPE_SARS2_in_vitro_Reactivity_top_96_percent_constrained.DBN	0.919293	0.96117	0.941478	0.984316	0.0140744		SARS_SF2_Mono_-1.ct	SHAPE_in_vivo_Incar_top_96_percent_constrained.DBN	0.930957	0.976176	0.941495	0.984246	0.0138973		SARS_SF2_Mono_-1.ct	Incar_DMS_invitro_Reactivities_top_96_percent_constrained.DBN	0.480236	0.435102	0.940796	0.989272	0.0152986		SARS_SF2_Mono_-1.ct	Pyle_SHAPE_SARS2_Reactivity_top_96_percent_constrained.DBN	0.937143	0.985381	0.940245	0.985838	0.0138678		SARS_SF2_Mono_-1.ct	Sun_Reactivities_top_96_percent_constrained.DBN	0.93838	0.988397	0.93838	0.988397	0.0150225
SARS_SF2_Mono_-1.ct	Rouskin_DMS_SARS2_Reactivity_top_97_percent_constrained.DBN	0.489855	0.439898	0.954269	0.993883	0.0151886		SARS_SF2_Mono_-1.ct	Incarnato_SHAPE_SARS2_in_vitro_Reactivity_top_97_percent_constrained.DBN	0.934197	0.964186	0.956742	0.987405	0.0150717		SARS_SF2_Mono_-1.ct	SHAPE_in_vivo_Incar_top_97_percent_constrained.DBN	0.944742	0.980972	0.955436	0.989081	0.0137888		SARS_SF2_Mono_-1.ct	Incar_DMS_invitro_Reactivities_top_97_percent_constrained.DBN	0.487658	0.436417	0.955338	0.992262	0.0144287		SARS_SF2_Mono_-1.ct	Pyle_SHAPE_SARS2_Reactivity_top_97_percent_constrained.DBN	0.951753	0.989325	0.954903	0.989785	0.0145083		SARS_SF2_Mono_-1.ct	Sun_Reactivities_top_97_percent_constrained.DBN	0.953814	0.991259	0.953814	0.991259	0.0152996
SARS_SF2_Mono_-1.ct	Rouskin_DMS_SARS2_Reactivity_top_98_percent_constrained.DBN	0.497346	0.441213	0.968861	0.996854	0.0145468		SARS_SF2_Mono_-1.ct	Incarnato_SHAPE_SARS2_in_vitro_Reactivity_top_98_percent_constrained.DBN	0.947865	0.968827	0.970739	0.992158	0.0138872		SARS_SF2_Mono_-1.ct	SHAPE_in_vivo_Incar_top_98_percent_constrained.DBN	0.958763	0.985458	0.969616	0.993605	0.0140886		SARS_SF2_Mono_-1.ct	Incar_DMS_invitro_Reactivities_top_98_percent_constrained.DBN	0.495493	0.437268	0.970687	0.994196	0.01526		SARS_SF2_Mono_-1.ct	Pyle_SHAPE_SARS2_Reactivity_top_98_percent_constrained.DBN	0.966834	0.992574	0.970034	0.993035	0.0150255		SARS_SF2_Mono_-1.ct	Sun_Reactivities_top_98_percent_constrained.DBN	0.969485	0.993812	0.969485	0.993812	0.0155731
SARS_SF2_Mono_-1.ct	Rouskin_DMS_SARS2_Reactivity_top_99_percent_constrained.DBN	0.505603	0.4416	0.984948	0.997728	0.0160499		SARS_SF2_Mono_-1.ct	Incarnato_SHAPE_SARS2_in_vitro_Reactivity_top_99_percent_constrained.DBN	0.961591	0.973391	0.984796	0.996831	0.0140128		SARS_SF2_Mono_-1.ct	SHAPE_in_vivo_Incar_top_99_percent_constrained.DBN	0.973726	0.988707	0.984748	0.99688	0.0150854		SARS_SF2_Mono_-1.ct	Incar_DMS_invitro_Reactivities_top_99_percent_constrained.DBN	0.503034	0.438428	0.985459	0.996834	0.0147253		SARS_SF2_Mono_-1.ct	Pyle_SHAPE_SARS2_Reactivity_top_99_percent_constrained.DBN	0.981384	0.996597	0.984633	0.997059	0.014556		SARS_SF2_Mono_-1.ct	Sun_Reactivities_top_99_percent_constrained.DBN	0.984919	0.996674	0.984919	0.996674	0.0153831
SARS_SF2_Mono_-1.ct	Rouskin_DMS_SARS2_Reactivity_top_100_percent_constrained.DBN	0.51333	0.442605	1	1	0.0150523		SARS_SF2_Mono_-1.ct	Incarnato_SHAPE_SARS2_in_vitro_Reactivity_top_100_percent_constrained.DBN	0.976436	0.976485	1	1	0.0152036		SARS_SF2_Mono_-1.ct	SHAPE_in_vivo_Incar_top_100_percent_constrained.DBN	0.988807	0.991801	1	1	0.0152517		SARS_SF2_Mono_-1.ct	Incar_DMS_invitro_Reactivities_top_100_percent_constrained.DBN	0.510457	0.439821	1	1	0.0145413		SARS_SF2_Mono_-1.ct	Pyle_SHAPE_SARS2_Reactivity_top_100_percent_constrained.DBN	0.996701	0.999536	1	1	0.0153673		SARS_SF2_Mono_-1.ct	Sun_Reactivities_top_100_percent_constrained.DBN	1	1	1	1	0.015081
					Sum	0.779701							Sum	0.690672							Sum	0.676756							Sum	0.741474							Sum	0.632653							Sum	0.74802

## Sheet: SF2 Di Results
Rouskins								Incarnato SHAPE in vitro								Incarnato SHAPE in vivo								Incarnato DMS in vitro								Pyle SHAPE								Sun SHAPE
		fpr	tpr	fpr norm	tpf norm	AUC				fpr	tpr	fpr norm	tpf norm	AUC				fpr	tpr	fpr norm	tpf norm	AUC				fpr	tpr	fpr norm	tpf norm	AUC				fpr	tpr	fpr norm	tpf norm	AUC				fpr	tpr	fpr norm	tpf norm	AUC
SARS_SF2_Di_-1.ct	Rouskin_DMS_SARS2_Reactivity_top_0_percent_constrained.DBN	0	0	0	0			SARS_SF2_Di_-1.ct	Incarnato_SHAPE_SARS2_in_vitro_Reactivity_top_0_percent_constrained.DBN	0	0	0	0			SARS_SF2_Di_-1.ct	SHAPE_in_vivo_Incar_top_0_percent_constrained.DBN	0	0	0	0			SARS_SF2_Di_-1.ct	Incar_DMS_invitro_Reactivities_top_0_percent_constrained.DBN	0	0	0	0			SARS_SF2_Di_-1.ct	Pyle_SHAPE_SARS2_Reactivity_top_0_percent_constrained.DBN	0	0	0	0			SARS_SF2_Di_-1.ct	Sun_Reactivities_top_0_percent_constrained.DBN	0	0	0	0
SARS_SF2_Di_-1.ct	Rouskin_DMS_SARS2_Reactivity_top_1_percent_constrained.DBN	0.00361778	0.00649663	0.00708104	0.0146527	0.000103756		SARS_SF2_Di_-1.ct	Incarnato_SHAPE_SARS2_in_vitro_Reactivity_top_1_percent_constrained.DBN	0.00630915	0.0145974	0.00645881	0.0149573	9.66061e-05		SARS_SF2_Di_-1.ct	SHAPE_in_vivo_Incar_top_1_percent_constrained.DBN	0.00504732	0.0166827	0.00509938	0.0168421	8.58843e-05		SARS_SF2_Di_-1.ct	Incar_DMS_invitro_Reactivities_top_1_percent_constrained.DBN	0.00504732	0.0044915	0.0099334	0.0101966	0.000101287		SARS_SF2_Di_-1.ct	Pyle_SHAPE_SARS2_Reactivity_top_1_percent_constrained.DBN	0.00866074	0.0117902	0.00868915	0.0117949	0.000102488		SARS_SF2_Di_-1.ct	Sun_Reactivities_top_1_percent_constrained.DBN	0.00544881	0.0163619	0.00544881	0.0163619	8.91528e-05
SARS_SF2_Di_-1.ct	Rouskin_DMS_SARS2_Reactivity_top_2_percent_constrained.DBN	0.00528311	0.0157202	0.0103406	0.0354559	0.000115569		SARS_SF2_Di_-1.ct	Incarnato_SHAPE_SARS2_in_vitro_Reactivity_top_2_percent_constrained.DBN	0.0100946	0.0327238	0.0103341	0.0335306	0.000129941		SARS_SF2_Di_-1.ct	SHAPE_in_vivo_Incar_top_2_percent_constrained.DBN	0.0122742	0.0303176	0.0124008	0.0306073	0.000223476		SARS_SF2_Di_-1.ct	Incar_DMS_invitro_Reactivities_top_2_percent_constrained.DBN	0.00992257	0.00914341	0.0195282	0.0207575	0.000199163		SARS_SF2_Di_-1.ct	Pyle_SHAPE_SARS2_Reactivity_top_2_percent_constrained.DBN	0.0164611	0.0248637	0.0165151	0.0248736	0.000194661		SARS_SF2_Di_-1.ct	Sun_Reactivities_top_2_percent_constrained.DBN	0.00877545	0.0356914	0.00877545	0.0356914	0.000118732
SARS_SF2_Di_-1.ct	Rouskin_DMS_SARS2_Reactivity_top_3_percent_constrained.DBN	0.00780981	0.023821	0.0152861	0.0537265	0.000265704		SARS_SF2_Di_-1.ct	Incarnato_SHAPE_SARS2_in_vitro_Reactivity_top_3_percent_constrained.DBN	0.0153714	0.0487648	0.015736	0.0499671	0.000269918		SARS_SF2_Di_-1.ct	SHAPE_in_vivo_Incar_top_3_percent_constrained.DBN	0.0199025	0.0433911	0.0201078	0.0438057	0.000337611		SARS_SF2_Di_-1.ct	Incar_DMS_invitro_Reactivities_top_3_percent_constrained.DBN	0.0151993	0.0133141	0.0299131	0.0302258	0.000313892		SARS_SF2_Di_-1.ct	Pyle_SHAPE_SARS2_Reactivity_top_3_percent_constrained.DBN	0.0237453	0.0385788	0.0238232	0.0385942	0.00028205		SARS_SF2_Di_-1.ct	Sun_Reactivities_top_3_percent_constrained.DBN	0.011758	0.0555021	0.011758	0.0555021	0.000165535
SARS_SF2_Di_-1.ct	Rouskin_DMS_SARS2_Reactivity_top_4_percent_constrained.DBN	0.00953256	0.0329644	0.018658	0.0743488	0.000250698		SARS_SF2_Di_-1.ct	Incarnato_SHAPE_SARS2_in_vitro_Reactivity_top_4_percent_constrained.DBN	0.0214511	0.063683	0.02196	0.0652531	0.000406132		SARS_SF2_Di_-1.ct	SHAPE_in_vivo_Incar_top_4_percent_constrained.DBN	0.0274161	0.056625	0.0276989	0.057166	0.000433954		SARS_SF2_Di_-1.ct	Incar_DMS_invitro_Reactivities_top_4_percent_constrained.DBN	0.0193863	0.0189285	0.0381533	0.0429716	0.000354095		SARS_SF2_Di_-1.ct	Pyle_SHAPE_SARS2_Reactivity_top_4_percent_constrained.DBN	0.0318899	0.051171	0.0319945	0.0511915	0.000418299		SARS_SF2_Di_-1.ct	Sun_Reactivities_top_4_percent_constrained.DBN	0.015142	0.0747514	0.015142	0.0747514	0.000252958
SARS_SF2_Di_-1.ct	Rouskin_DMS_SARS2_Reactivity_top_5_percent_constrained.DBN	0.0112553	0.0421078	0.0220299	0.0949711	0.000320235		SARS_SF2_Di_-1.ct	Incarnato_SHAPE_SARS2_in_vitro_Reactivity_top_5_percent_constrained.DBN	0.0275308	0.0786012	0.0281839	0.0805391	0.000501271		SARS_SF2_Di_-1.ct	SHAPE_in_vivo_Incar_top_5_percent_constrained.DBN	0.0349297	0.0698588	0.03529	0.0705263	0.000535374		SARS_SF2_Di_-1.ct	Incar_DMS_invitro_Reactivities_top_5_percent_constrained.DBN	0.022885	0.0255855	0.0450389	0.0580845	0.00039995		SARS_SF2_Di_-1.ct	Pyle_SHAPE_SARS2_Reactivity_top_5_percent_constrained.DBN	0.0391741	0.0648861	0.0393026	0.0649121	0.000474384		SARS_SF2_Di_-1.ct	Sun_Reactivities_top_5_percent_constrained.DBN	0.0207628	0.0908726	0.0207628	0.0908726	0.000510784
SARS_SF2_Di_-1.ct	Rouskin_DMS_SARS2_Reactivity_top_6_percent_constrained.DBN	0.0135523	0.0505294	0.0265258	0.113965	0.000512376		SARS_SF2_Di_-1.ct	Incarnato_SHAPE_SARS2_in_vitro_Reactivity_top_6_percent_constrained.DBN	0.0339547	0.0930382	0.0347601	0.095332	0.000626927		SARS_SF2_Di_-1.ct	SHAPE_in_vivo_Incar_top_6_percent_constrained.DBN	0.0417551	0.0840552	0.0421858	0.0848583	0.000585162		SARS_SF2_Di_-1.ct	Incar_DMS_invitro_Reactivities_top_6_percent_constrained.DBN	0.0253513	0.033606	0.0498928	0.0762928	0.000370312		SARS_SF2_Di_-1.ct	Pyle_SHAPE_SARS2_Reactivity_top_6_percent_constrained.DBN	0.0471465	0.0776388	0.0473012	0.0776699	0.000621252		SARS_SF2_Di_-1.ct	Sun_Reactivities_top_6_percent_constrained.DBN	0.0277029	0.105149	0.0277029	0.105149	0.000729742
SARS_SF2_Di_-1.ct	Rouskin_DMS_SARS2_Reactivity_top_7_percent_constrained.DBN	0.0151602	0.0598332	0.0296729	0.134949	0.000424703		SARS_SF2_Di_-1.ct	Incarnato_SHAPE_SARS2_in_vitro_Reactivity_top_7_percent_constrained.DBN	0.0415257	0.105871	0.0425107	0.108481	0.000840792		SARS_SF2_Di_-1.ct	SHAPE_in_vivo_Incar_top_7_percent_constrained.DBN	0.0452538	0.102903	0.0457206	0.103887	0.000367218		SARS_SF2_Di_-1.ct	Incar_DMS_invitro_Reactivities_top_7_percent_constrained.DBN	0.0283912	0.0409047	0.0558754	0.0928623	0.00055556		SARS_SF2_Di_-1.ct	Pyle_SHAPE_SARS2_Reactivity_top_7_percent_constrained.DBN	0.0548896	0.0907924	0.0550696	0.0908289	0.000705599		SARS_SF2_Di_-1.ct	Sun_Reactivities_top_7_percent_constrained.DBN	0.0340694	0.120228	0.0340694	0.120228	0.000765431
SARS_SF2_Di_-1.ct	Rouskin_DMS_SARS2_Reactivity_top_8_percent_constrained.DBN	0.0172275	0.0684953	0.0337192	0.154486	0.000625099		SARS_SF2_Di_-1.ct	Incarnato_SHAPE_SARS2_in_vitro_Reactivity_top_8_percent_constrained.DBN	0.0464583	0.122393	0.0475603	0.125411	0.000633277		SARS_SF2_Di_-1.ct	SHAPE_in_vivo_Incar_top_8_percent_constrained.DBN	0.0524233	0.116699	0.052964	0.117814	0.000853377		SARS_SF2_Di_-1.ct	Incar_DMS_invitro_Reactivities_top_8_percent_constrained.DBN	0.0302839	0.0497273	0.0596004	0.112891	0.000420524		SARS_SF2_Di_-1.ct	Pyle_SHAPE_SARS2_Reactivity_top_8_percent_constrained.DBN	0.0638371	0.102182	0.0640465	0.102223	0.000917639		SARS_SF2_Di_-1.ct	Sun_Reactivities_top_8_percent_constrained.DBN	0.0407227	0.134905	0.0407227	0.134905	0.000897564
SARS_SF2_Di_-1.ct	Rouskin_DMS_SARS2_Reactivity_top_9_percent_constrained.DBN	0.0199265	0.0762753	0.0390019	0.172033	0.000908797		SARS_SF2_Di_-1.ct	Incarnato_SHAPE_SARS2_in_vitro_Reactivity_top_9_percent_constrained.DBN	0.050932	0.139557	0.0521402	0.142998	0.000654914		SARS_SF2_Di_-1.ct	SHAPE_in_vivo_Incar_top_9_percent_constrained.DBN	0.0588471	0.131457	0.0594541	0.132713	0.00086132		SARS_SF2_Di_-1.ct	Incar_DMS_invitro_Reactivities_top_9_percent_constrained.DBN	0.0325781	0.0580687	0.0641156	0.131828	0.000595228		SARS_SF2_Di_-1.ct	Pyle_SHAPE_SARS2_Reactivity_top_9_percent_constrained.DBN	0.0724405	0.114132	0.0726781	0.114178	0.000985539		SARS_SF2_Di_-1.ct	Sun_Reactivities_top_9_percent_constrained.DBN	0.0458274	0.151748	0.0458274	0.151748	0.000774627
SARS_SF2_Di_-1.ct	Rouskin_DMS_SARS2_Reactivity_top_10_percent_constrained.DBN	0.0226829	0.083975	0.044397	0.189399	0.00102182		SARS_SF2_Di_-1.ct	Incarnato_SHAPE_SARS2_in_vitro_Reactivity_top_10_percent_constrained.DBN	0.0548322	0.157523	0.0561329	0.161407	0.000644453		SARS_SF2_Di_-1.ct	SHAPE_in_vivo_Incar_top_10_percent_constrained.DBN	0.0654431	0.145974	0.0661181	0.147368	0.000982058		SARS_SF2_Di_-1.ct	Incar_DMS_invitro_Reactivities_top_10_percent_constrained.DBN	0.034815	0.06641	0.0685179	0.150765	0.000663712		SARS_SF2_Di_-1.ct	Pyle_SHAPE_SARS2_Reactivity_top_10_percent_constrained.DBN	0.0805277	0.126724	0.0807918	0.126775	0.00102862		SARS_SF2_Di_-1.ct	Sun_Reactivities_top_10_percent_constrained.DBN	0.0519071	0.167228	0.0519071	0.167228	0.0010167
SARS_SF2_Di_-1.ct	Rouskin_DMS_SARS2_Reactivity_top_11_percent_constrained.DBN	0.0251522	0.0921559	0.0492301	0.207851	0.00100456		SARS_SF2_Di_-1.ct	Incarnato_SHAPE_SARS2_in_vitro_Reactivity_top_11_percent_constrained.DBN	0.0597075	0.174126	0.0611238	0.178419	0.00089047		SARS_SF2_Di_-1.ct	SHAPE_in_vivo_Incar_top_11_percent_constrained.DBN	0.0723831	0.16001	0.0731297	0.161538	0.00113265		SARS_SF2_Di_-1.ct	Incar_DMS_invitro_Reactivities_top_11_percent_constrained.DBN	0.0374534	0.0742701	0.0737104	0.168609	0.000875495		SARS_SF2_Di_-1.ct	Pyle_SHAPE_SARS2_Reactivity_top_11_percent_constrained.DBN	0.0880987	0.140119	0.0883876	0.140175	0.00106474		SARS_SF2_Di_-1.ct	Sun_Reactivities_top_11_percent_constrained.DBN	0.060281	0.1795	0.060281	0.1795	0.00150312
SARS_SF2_Di_-1.ct	Rouskin_DMS_SARS2_Reactivity_top_12_percent_constrained.DBN	0.0275066	0.100417	0.0538384	0.226483	0.0010437		SARS_SF2_Di_-1.ct	Incarnato_SHAPE_SARS2_in_vitro_Reactivity_top_12_percent_constrained.DBN	0.0659019	0.188884	0.0674652	0.19354	0.00122731		SARS_SF2_Di_-1.ct	SHAPE_in_vivo_Incar_top_12_percent_constrained.DBN	0.079782	0.173404	0.080605	0.175061	0.00130862		SARS_SF2_Di_-1.ct	Incar_DMS_invitro_Reactivities_top_12_percent_constrained.DBN	0.0401491	0.0819698	0.0790157	0.186089	0.000987265		SARS_SF2_Di_-1.ct	Pyle_SHAPE_SARS2_Reactivity_top_12_percent_constrained.DBN	0.0968167	0.151829	0.0971343	0.15189	0.00132853		SARS_SF2_Di_-1.ct	Sun_Reactivities_top_12_percent_constrained.DBN	0.0665902	0.194658	0.0665902	0.194658	0.00122813
SARS_SF2_Di_-1.ct	Rouskin_DMS_SARS2_Reactivity_top_13_percent_constrained.DBN	0.0303204	0.108037	0.0593458	0.243669	0.001342		SARS_SF2_Di_-1.ct	Incarnato_SHAPE_SARS2_in_vitro_Reactivity_top_13_percent_constrained.DBN	0.0713507	0.204684	0.0730433	0.20973	0.00116989		SARS_SF2_Di_-1.ct	SHAPE_in_vivo_Incar_top_13_percent_constrained.DBN	0.0862633	0.188081	0.087153	0.189879	0.00124334		SARS_SF2_Di_-1.ct	Incar_DMS_invitro_Reactivities_top_13_percent_constrained.DBN	0.0427301	0.0899102	0.0840953	0.204115	0.00103682		SARS_SF2_Di_-1.ct	Pyle_SHAPE_SARS2_Reactivity_top_13_percent_constrained.DBN	0.105191	0.16402	0.105536	0.164086	0.00137855		SARS_SF2_Di_-1.ct	Sun_Reactivities_top_13_percent_constrained.DBN	0.0750789	0.206769	0.0750789	0.206769	0.0017552
SARS_SF2_Di_-1.ct	Rouskin_DMS_SARS2_Reactivity_top_14_percent_constrained.DBN	0.0333065	0.115496	0.0651905	0.260492	0.00152249		SARS_SF2_Di_-1.ct	Incarnato_SHAPE_SARS2_in_vitro_Reactivity_top_14_percent_constrained.DBN	0.0768569	0.220404	0.0786801	0.225838	0.001273		SARS_SF2_Di_-1.ct	SHAPE_in_vivo_Incar_top_14_percent_constrained.DBN	0.0921136	0.203641	0.0930637	0.205587	0.00121515		SARS_SF2_Di_-1.ct	Incar_DMS_invitro_Reactivities_top_14_percent_constrained.DBN	0.0447376	0.0985723	0.0880461	0.22378	0.000884107		SARS_SF2_Di_-1.ct	Pyle_SHAPE_SARS2_Reactivity_top_14_percent_constrained.DBN	0.112934	0.177174	0.113304	0.177245	0.00137691		SARS_SF2_Di_-1.ct	Sun_Reactivities_top_14_percent_constrained.DBN	0.0800115	0.223853	0.0800115	0.223853	0.00110418
SARS_SF2_Di_-1.ct	Rouskin_DMS_SARS2_Reactivity_top_15_percent_constrained.DBN	0.0360055	0.123276	0.0704732	0.278039	0.00146879		SARS_SF2_Di_-1.ct	Incarnato_SHAPE_SARS2_in_vitro_Reactivity_top_15_percent_constrained.DBN	0.0829366	0.235322	0.084904	0.241124	0.00150074		SARS_SF2_Di_-1.ct	SHAPE_in_vivo_Incar_top_15_percent_constrained.DBN	0.0988242	0.217998	0.0998435	0.220081	0.00149212		SARS_SF2_Di_-1.ct	Incar_DMS_invitro_Reactivities_top_15_percent_constrained.DBN	0.0471465	0.106753	0.092787	0.242353	0.00114898		SARS_SF2_Di_-1.ct	Pyle_SHAPE_SARS2_Reactivity_top_15_percent_constrained.DBN	0.121136	0.189605	0.121533	0.189681	0.00156085		SARS_SF2_Di_-1.ct	Sun_Reactivities_top_15_percent_constrained.DBN	0.085575	0.240055	0.085575	0.240055	0.00133555
SARS_SF2_Di_-1.ct	Rouskin_DMS_SARS2_Reactivity_top_16_percent_constrained.DBN	0.0389342	0.130735	0.0762055	0.294863	0.00169023		SARS_SF2_Di_-1.ct	Incarnato_SHAPE_SARS2_in_vitro_Reactivity_top_16_percent_constrained.DBN	0.0885575	0.250882	0.0906582	0.257068	0.00147922		SARS_SF2_Di_-1.ct	SHAPE_in_vivo_Incar_top_16_percent_constrained.DBN	0.105191	0.232836	0.106276	0.235061	0.00151195		SARS_SF2_Di_-1.ct	Incar_DMS_invitro_Reactivities_top_16_percent_constrained.DBN	0.0500717	0.114132	0.0985439	0.259104	0.00149163		SARS_SF2_Di_-1.ct	Pyle_SHAPE_SARS2_Reactivity_top_16_percent_constrained.DBN	0.129854	0.201396	0.13028	0.201476	0.00176225		SARS_SF2_Di_-1.ct	Sun_Reactivities_top_16_percent_constrained.DBN	0.0910812	0.256336	0.0910812	0.256336	0.00141143
SARS_SF2_Di_-1.ct	Rouskin_DMS_SARS2_Reactivity_top_17_percent_constrained.DBN	0.0415183	0.138675	0.0812633	0.312771	0.00158196		SARS_SF2_Di_-1.ct	Incarnato_SHAPE_SARS2_in_vitro_Reactivity_top_17_percent_constrained.DBN	0.0945799	0.265881	0.0968234	0.272436	0.00167963		SARS_SF2_Di_-1.ct	SHAPE_in_vivo_Incar_top_17_percent_constrained.DBN	0.111901	0.247193	0.113056	0.249555	0.00169194		SARS_SF2_Di_-1.ct	Incar_DMS_invitro_Reactivities_top_17_percent_constrained.DBN	0.0527101	0.121992	0.103736	0.276948	0.00143804		SARS_SF2_Di_-1.ct	Pyle_SHAPE_SARS2_Reactivity_top_17_percent_constrained.DBN	0.137826	0.214148	0.138278	0.214234	0.00171358		SARS_SF2_Di_-1.ct	Sun_Reactivities_top_17_percent_constrained.DBN	0.0935475	0.276949	0.0935475	0.276949	0.00068304
SARS_SF2_Di_-1.ct	Rouskin_DMS_SARS2_Reactivity_top_18_percent_constrained.DBN	0.0453658	0.144851	0.088794	0.3267	0.00246026		SARS_SF2_Di_-1.ct	Incarnato_SHAPE_SARS2_in_vitro_Reactivity_top_18_percent_constrained.DBN	0.101921	0.279034	0.104339	0.285914	0.00214884		SARS_SF2_Di_-1.ct	SHAPE_in_vivo_Incar_top_18_percent_constrained.DBN	0.118841	0.261229	0.120067	0.263725	0.00184914		SARS_SF2_Di_-1.ct	Incar_DMS_invitro_Reactivities_top_18_percent_constrained.DBN	0.0556926	0.129291	0.109606	0.293518	0.00172287		SARS_SF2_Di_-1.ct	Pyle_SHAPE_SARS2_Reactivity_top_18_percent_constrained.DBN	0.144824	0.228264	0.145299	0.228356	0.00160314		SARS_SF2_Di_-1.ct	Sun_Reactivities_top_18_percent_constrained.DBN	0.097505	0.295396	0.097505	0.295396	0.00116905
SARS_SF2_Di_-1.ct	Rouskin_DMS_SARS2_Reactivity_top_19_percent_constrained.DBN	0.048639	0.151909	0.0952006	0.342619	0.00219504		SARS_SF2_Di_-1.ct	Incarnato_SHAPE_SARS2_in_vitro_Reactivity_top_19_percent_constrained.DBN	0.108919	0.292669	0.111503	0.299885	0.0021482		SARS_SF2_Di_-1.ct	SHAPE_in_vivo_Incar_top_19_percent_constrained.DBN	0.125609	0.275505	0.126905	0.278138	0.00190185		SARS_SF2_Di_-1.ct	Incar_DMS_invitro_Reactivities_top_19_percent_constrained.DBN	0.0586177	0.13675	0.115363	0.310452	0.00178723		SARS_SF2_Di_-1.ct	Pyle_SHAPE_SARS2_Reactivity_top_19_percent_constrained.DBN	0.153542	0.240055	0.154045	0.240151	0.00210053		SARS_SF2_Di_-1.ct	Sun_Reactivities_top_19_percent_constrained.DBN	0.102954	0.311758	0.102954	0.311758	0.00169871
SARS_SF2_Di_-1.ct	Rouskin_DMS_SARS2_Reactivity_top_20_percent_constrained.DBN	0.0512806	0.159769	0.100371	0.360347	0.0018631		SARS_SF2_Di_-1.ct	Incarnato_SHAPE_SARS2_in_vitro_Reactivity_top_20_percent_constrained.DBN	0.116146	0.305983	0.118901	0.313527	0.00231956		SARS_SF2_Di_-1.ct	SHAPE_in_vivo_Incar_top_20_percent_constrained.DBN	0.133008	0.2889	0.13438	0.29166	0.00218022		SARS_SF2_Di_-1.ct	Incar_DMS_invitro_Reactivities_top_20_percent_constrained.DBN	0.061887	0.143648	0.121797	0.326111	0.00209824		SARS_SF2_Di_-1.ct	Pyle_SHAPE_SARS2_Reactivity_top_20_percent_constrained.DBN	0.16203	0.252085	0.162562	0.252186	0.00214775		SARS_SF2_Di_-1.ct	Sun_Reactivities_top_20_percent_constrained.DBN	0.109263	0.326917	0.109263	0.326917	0.00206257
SARS_SF2_Di_-1.ct	Rouskin_DMS_SARS2_Reactivity_top_21_percent_constrained.DBN	0.0538647	0.167709	0.105429	0.378256	0.00191318		SARS_SF2_Di_-1.ct	Incarnato_SHAPE_SARS2_in_vitro_Reactivity_top_21_percent_constrained.DBN	0.123946	0.318495	0.126886	0.326348	0.00260603		SARS_SF2_Di_-1.ct	SHAPE_in_vivo_Incar_top_21_percent_constrained.DBN	0.139604	0.303417	0.141044	0.306316	0.00204128		SARS_SF2_Di_-1.ct	Incar_DMS_invitro_Reactivities_top_21_percent_constrained.DBN	0.0648695	0.151027	0.127667	0.342862	0.00201251		SARS_SF2_Di_-1.ct	Pyle_SHAPE_SARS2_Reactivity_top_21_percent_constrained.DBN	0.170462	0.264277	0.171021	0.264383	0.0022364		SARS_SF2_Di_-1.ct	Sun_Reactivities_top_21_percent_constrained.DBN	0.113679	0.344722	0.113679	0.344722	0.00152243
SARS_SF2_Di_-1.ct	Rouskin_DMS_SARS2_Reactivity_top_22_percent_constrained.DBN	0.0567934	0.175249	0.111161	0.39526	0.00226574		SARS_SF2_Di_-1.ct	Incarnato_SHAPE_SARS2_in_vitro_Reactivity_top_22_percent_constrained.DBN	0.13123	0.331729	0.134343	0.339908	0.00253469		SARS_SF2_Di_-1.ct	SHAPE_in_vivo_Incar_top_22_percent_constrained.DBN	0.146315	0.317854	0.147824	0.320891	0.00217559		SARS_SF2_Di_-1.ct	Incar_DMS_invitro_Reactivities_top_22_percent_constrained.DBN	0.06768	0.158566	0.133198	0.359978	0.00199107		SARS_SF2_Di_-1.ct	Pyle_SHAPE_SARS2_Reactivity_top_22_percent_constrained.DBN	0.179008	0.276227	0.179595	0.276338	0.00236934		SARS_SF2_Di_-1.ct	Sun_Reactivities_top_22_percent_constrained.DBN	0.119644	0.360363	0.119644	0.360363	0.00214957
SARS_SF2_Di_-1.ct	Rouskin_DMS_SARS2_Reactivity_top_23_percent_constrained.DBN	0.0601815	0.182066	0.117793	0.410637	0.00272312		SARS_SF2_Di_-1.ct	Incarnato_SHAPE_SARS2_in_vitro_Reactivity_top_23_percent_constrained.DBN	0.138457	0.345043	0.141742	0.35355	0.00261566		SARS_SF2_Di_-1.ct	SHAPE_in_vivo_Incar_top_23_percent_constrained.DBN	0.153312	0.331809	0.154894	0.33498	0.00236817		SARS_SF2_Di_-1.ct	Incar_DMS_invitro_Reactivities_top_23_percent_constrained.DBN	0.0700315	0.166827	0.137826	0.378733	0.0017528		SARS_SF2_Di_-1.ct	Pyle_SHAPE_SARS2_Reactivity_top_23_percent_constrained.DBN	0.186693	0.289381	0.187306	0.289497	0.00223228		SARS_SF2_Di_-1.ct	Sun_Reactivities_top_23_percent_constrained.DBN	0.12538	0.376323	0.12538	0.376323	0.00215844
SARS_SF2_Di_-1.ct	Rouskin_DMS_SARS2_Reactivity_top_24_percent_constrained.DBN	0.063627	0.188803	0.124536	0.425832	0.00287175		SARS_SF2_Di_-1.ct	Incarnato_SHAPE_SARS2_in_vitro_Reactivity_top_24_percent_constrained.DBN	0.146487	0.357235	0.149962	0.366042	0.00300898		SARS_SF2_Di_-1.ct	SHAPE_in_vivo_Incar_top_24_percent_constrained.DBN	0.160539	0.345444	0.162195	0.348745	0.00254632		SARS_SF2_Di_-1.ct	Incar_DMS_invitro_Reactivities_top_24_percent_constrained.DBN	0.0731288	0.173965	0.143921	0.394938	0.00240734		SARS_SF2_Di_-1.ct	Pyle_SHAPE_SARS2_Reactivity_top_24_percent_constrained.DBN	0.195526	0.301011	0.196168	0.301131	0.00266856		SARS_SF2_Di_-1.ct	Sun_Reactivities_top_24_percent_constrained.DBN	0.130944	0.392525	0.130944	0.392525	0.00218382
SARS_SF2_Di_-1.ct	Rouskin_DMS_SARS2_Reactivity_top_25_percent_constrained.DBN	0.0665556	0.196262	0.130269	0.442656	0.00253742		SARS_SF2_Di_-1.ct	Incarnato_SHAPE_SARS2_in_vitro_Reactivity_top_25_percent_constrained.DBN	0.153943	0.370228	0.157595	0.379356	0.00289567		SARS_SF2_Di_-1.ct	SHAPE_in_vivo_Incar_top_25_percent_constrained.DBN	0.168225	0.358438	0.16996	0.361862	0.00280985		SARS_SF2_Di_-1.ct	Incar_DMS_invitro_Reactivities_top_25_percent_constrained.DBN	0.076226	0.181184	0.150017	0.411326	0.00250723		SARS_SF2_Di_-1.ct	Pyle_SHAPE_SARS2_Reactivity_top_25_percent_constrained.DBN	0.203958	0.313122	0.204627	0.313247	0.00264975		SARS_SF2_Di_-1.ct	Sun_Reactivities_top_25_percent_constrained.DBN	0.136392	0.408887	0.136392	0.408887	0.00222795
SARS_SF2_Di_-1.ct	Rouskin_DMS_SARS2_Reactivity_top_26_percent_constrained.DBN	0.0694269	0.203802	0.135889	0.45966	0.00258323		SARS_SF2_Di_-1.ct	Incarnato_SHAPE_SARS2_in_vitro_Reactivity_top_26_percent_constrained.DBN	0.161686	0.38282	0.165522	0.392258	0.00310932		SARS_SF2_Di_-1.ct	SHAPE_in_vivo_Incar_top_26_percent_constrained.DBN	0.175509	0.371992	0.177319	0.375547	0.00276377		SARS_SF2_Di_-1.ct	Incar_DMS_invitro_Reactivities_top_26_percent_constrained.DBN	0.0792085	0.188483	0.155887	0.427895	0.00251163		SARS_SF2_Di_-1.ct	Pyle_SHAPE_SARS2_Reactivity_top_26_percent_constrained.DBN	0.212102	0.325714	0.212798	0.325844	0.00266256		SARS_SF2_Di_-1.ct	Sun_Reactivities_top_26_percent_constrained.DBN	0.142988	0.423645	0.142988	0.423645	0.00279433
SARS_SF2_Di_-1.ct	Rouskin_DMS_SARS2_Reactivity_top_27_percent_constrained.DBN	0.0725853	0.21102	0.14207	0.475941	0.0029422		SARS_SF2_Di_-1.ct	Incarnato_SHAPE_SARS2_in_vitro_Reactivity_top_27_percent_constrained.DBN	0.169773	0.394931	0.173801	0.404668	0.00335025		SARS_SF2_Di_-1.ct	SHAPE_in_vivo_Incar_top_27_percent_constrained.DBN	0.181703	0.387071	0.183578	0.390769	0.00244556		SARS_SF2_Di_-1.ct	Incar_DMS_invitro_Reactivities_top_27_percent_constrained.DBN	0.0823057	0.195701	0.161982	0.444283	0.00270812		SARS_SF2_Di_-1.ct	Pyle_SHAPE_SARS2_Reactivity_top_27_percent_constrained.DBN	0.220017	0.338547	0.220739	0.338683	0.0026895		SARS_SF2_Di_-1.ct	Sun_Reactivities_top_27_percent_constrained.DBN	0.149928	0.437921	0.149928	0.437921	0.0030392
SARS_SF2_Di_-1.ct	Rouskin_DMS_SARS2_Reactivity_top_28_percent_constrained.DBN	0.0759734	0.217838	0.148702	0.491317	0.00325814		SARS_SF2_Di_-1.ct	Incarnato_SHAPE_SARS2_in_vitro_Reactivity_top_28_percent_constrained.DBN	0.178262	0.406481	0.182491	0.416502	0.00361942		SARS_SF2_Di_-1.ct	SHAPE_in_vivo_Incar_top_28_percent_constrained.DBN	0.18916	0.400385	0.191111	0.404211	0.00304499		SARS_SF2_Di_-1.ct	Incar_DMS_invitro_Reactivities_top_28_percent_constrained.DBN	0.0863206	0.201556	0.169884	0.457575	0.00361556		SARS_SF2_Di_-1.ct	Pyle_SHAPE_SARS2_Reactivity_top_28_percent_constrained.DBN	0.228047	0.351219	0.228795	0.35136	0.00283061		SARS_SF2_Di_-1.ct	Sun_Reactivities_top_28_percent_constrained.DBN	0.15618	0.45316	0.15618	0.45316	0.00283306
SARS_SF2_Di_-1.ct	Rouskin_DMS_SARS2_Reactivity_top_29_percent_constrained.DBN	0.0794763	0.224495	0.155558	0.506331	0.00347153		SARS_SF2_Di_-1.ct	Incarnato_SHAPE_SARS2_in_vitro_Reactivity_top_29_percent_constrained.DBN	0.186693	0.41811	0.191122	0.428419	0.00369782		SARS_SF2_Di_-1.ct	SHAPE_in_vivo_Incar_top_29_percent_constrained.DBN	0.19782	0.412015	0.199861	0.415951	0.00363961		SARS_SF2_Di_-1.ct	Incar_DMS_invitro_Reactivities_top_29_percent_constrained.DBN	0.0904502	0.207331	0.178011	0.470685	0.00382541		SARS_SF2_Di_-1.ct	Pyle_SHAPE_SARS2_Reactivity_top_29_percent_constrained.DBN	0.237281	0.362287	0.23806	0.362433	0.00335779		SARS_SF2_Di_-1.ct	Sun_Reactivities_top_29_percent_constrained.DBN	0.16312	0.467437	0.16312	0.467437	0.00324404
SARS_SF2_Di_-1.ct	Rouskin_DMS_SARS2_Reactivity_top_30_percent_constrained.DBN	0.0829792	0.231232	0.162414	0.521527	0.00357571		SARS_SF2_Di_-1.ct	Incarnato_SHAPE_SARS2_in_vitro_Reactivity_top_30_percent_constrained.DBN	0.195985	0.428537	0.200634	0.439103	0.00417677		SARS_SF2_Di_-1.ct	SHAPE_in_vivo_Incar_top_30_percent_constrained.DBN	0.20585	0.424527	0.207974	0.428583	0.00347694		SARS_SF2_Di_-1.ct	Incar_DMS_invitro_Reactivities_top_30_percent_constrained.DBN	0.0941784	0.213587	0.185348	0.484887	0.0035577		SARS_SF2_Di_-1.ct	Pyle_SHAPE_SARS2_Reactivity_top_30_percent_constrained.DBN	0.245713	0.374398	0.246519	0.374549	0.0031683		SARS_SF2_Di_-1.ct	Sun_Reactivities_top_30_percent_constrained.DBN	0.169888	0.481954	0.169888	0.481954	0.00326186
SARS_SF2_Di_-1.ct	Rouskin_DMS_SARS2_Reactivity_top_31_percent_constrained.DBN	0.0867118	0.237568	0.16972	0.535818	0.00391459		SARS_SF2_Di_-1.ct	Incarnato_SHAPE_SARS2_in_vitro_Reactivity_top_31_percent_constrained.DBN	0.204244	0.440407	0.209089	0.451266	0.00381553		SARS_SF2_Di_-1.ct	SHAPE_in_vivo_Incar_top_31_percent_constrained.DBN	0.213823	0.437119	0.216028	0.441296	0.0035545		SARS_SF2_Di_-1.ct	Incar_DMS_invitro_Reactivities_top_31_percent_constrained.DBN	0.0978492	0.220003	0.192573	0.499454	0.0036082		SARS_SF2_Di_-1.ct	Pyle_SHAPE_SARS2_Reactivity_top_31_percent_constrained.DBN	0.254603	0.385948	0.255438	0.386103	0.00344378		SARS_SF2_Di_-1.ct	Sun_Reactivities_top_31_percent_constrained.DBN	0.175968	0.497433	0.175968	0.497433	0.00302426
SARS_SF2_Di_-1.ct	Rouskin_DMS_SARS2_Reactivity_top_32_percent_constrained.DBN	0.0901573	0.244305	0.176464	0.551013	0.00371595		SARS_SF2_Di_-1.ct	Incarnato_SHAPE_SARS2_in_vitro_Reactivity_top_32_percent_constrained.DBN	0.212217	0.452679	0.217251	0.46384	0.00378567		SARS_SF2_Di_-1.ct	SHAPE_in_vivo_Incar_top_32_percent_constrained.DBN	0.222254	0.44907	0.224547	0.45336	0.00386185		SARS_SF2_Di_-1.ct	Incar_DMS_invitro_Reactivities_top_32_percent_constrained.DBN	0.102208	0.225377	0.201151	0.511653	0.0043894		SARS_SF2_Di_-1.ct	Pyle_SHAPE_SARS2_Reactivity_top_32_percent_constrained.DBN	0.263264	0.397738	0.264127	0.397898	0.00345739		SARS_SF2_Di_-1.ct	Sun_Reactivities_top_32_percent_constrained.DBN	0.183023	0.51155	0.183023	0.51155	0.00360887
SARS_SF2_Di_-1.ct	Rouskin_DMS_SARS2_Reactivity_top_33_percent_constrained.DBN	0.0941771	0.250241	0.184332	0.564399	0.00444059		SARS_SF2_Di_-1.ct	Incarnato_SHAPE_SARS2_in_vitro_Reactivity_top_33_percent_constrained.DBN	0.220591	0.464389	0.225823	0.475838	0.00407917		SARS_SF2_Di_-1.ct	SHAPE_in_vivo_Incar_top_33_percent_constrained.DBN	0.231833	0.459416	0.234224	0.463806	0.00448836		SARS_SF2_Di_-1.ct	Incar_DMS_invitro_Reactivities_top_33_percent_constrained.DBN	0.105477	0.232355	0.207586	0.527495	0.00339397		SARS_SF2_Di_-1.ct	Pyle_SHAPE_SARS2_Reactivity_top_33_percent_constrained.DBN	0.271179	0.410651	0.272068	0.410816	0.00326232		SARS_SF2_Di_-1.ct	Sun_Reactivities_top_33_percent_constrained.DBN	0.191454	0.523741	0.191454	0.523741	0.00441582
SARS_SF2_Di_-1.ct	Rouskin_DMS_SARS2_Reactivity_top_34_percent_constrained.DBN	0.0980246	0.256416	0.191862	0.578329	0.00435518		SARS_SF2_Di_-1.ct	Incarnato_SHAPE_SARS2_in_vitro_Reactivity_top_34_percent_constrained.DBN	0.228907	0.476179	0.234337	0.487919	0.00415409		SARS_SF2_Di_-1.ct	SHAPE_in_vivo_Incar_top_34_percent_constrained.DBN	0.240493	0.471046	0.242974	0.475547	0.00416107		SARS_SF2_Di_-1.ct	Incar_DMS_invitro_Reactivities_top_34_percent_constrained.DBN	0.109148	0.238691	0.21481	0.541879	0.00391469		SARS_SF2_Di_-1.ct	Pyle_SHAPE_SARS2_Reactivity_top_34_percent_constrained.DBN	0.280413	0.421639	0.281333	0.421809	0.00390788		SARS_SF2_Di_-1.ct	Sun_Reactivities_top_34_percent_constrained.DBN	0.2	0.535772	0.2	0.535772	0.00457872
SARS_SF2_Di_-1.ct	Rouskin_DMS_SARS2_Reactivity_top_35_percent_constrained.DBN	0.102619	0.26163	0.200854	0.590087	0.00530594		SARS_SF2_Di_-1.ct	Incarnato_SHAPE_SARS2_in_vitro_Reactivity_top_35_percent_constrained.DBN	0.23797	0.486927	0.243615	0.498932	0.00462869		SARS_SF2_Di_-1.ct	SHAPE_in_vivo_Incar_top_35_percent_constrained.DBN	0.2499	0.481633	0.252477	0.486235	0.00462088		SARS_SF2_Di_-1.ct	Incar_DMS_invitro_Reactivities_top_35_percent_constrained.DBN	0.113221	0.244546	0.222824	0.555171	0.00444939		SARS_SF2_Di_-1.ct	Pyle_SHAPE_SARS2_Reactivity_top_35_percent_constrained.DBN	0.28936	0.433029	0.29031	0.433202	0.0038888		SARS_SF2_Di_-1.ct	Sun_Reactivities_top_35_percent_constrained.DBN	0.207112	0.549808	0.207112	0.549808	0.0039103
SARS_SF2_Di_-1.ct	Rouskin_DMS_SARS2_Reactivity_top_36_percent_constrained.DBN	0.106983	0.267084	0.209396	0.602388	0.00514572		SARS_SF2_Di_-1.ct	Incarnato_SHAPE_SARS2_in_vitro_Reactivity_top_36_percent_constrained.DBN	0.246057	0.499038	0.251894	0.511341	0.0042334		SARS_SF2_Di_-1.ct	SHAPE_in_vivo_Incar_top_36_percent_constrained.DBN	0.258274	0.493744	0.260938	0.498462	0.00421715		SARS_SF2_Di_-1.ct	Incar_DMS_invitro_Reactivities_top_36_percent_constrained.DBN	0.117637	0.24984	0.231516	0.567189	0.00492985		SARS_SF2_Di_-1.ct	Pyle_SHAPE_SARS2_Reactivity_top_36_percent_constrained.DBN	0.29762	0.44546	0.298596	0.445639	0.00369272		SARS_SF2_Di_-1.ct	Sun_Reactivities_top_36_percent_constrained.DBN	0.215371	0.562239	0.215371	0.562239	0.00464367
SARS_SF2_Di_-1.ct	Rouskin_DMS_SARS2_Reactivity_top_37_percent_constrained.DBN	0.110945	0.273099	0.217152	0.615955	0.00477699		SARS_SF2_Di_-1.ct	Incarnato_SHAPE_SARS2_in_vitro_Reactivity_top_37_percent_constrained.DBN	0.253341	0.512271	0.259351	0.524901	0.00391418		SARS_SF2_Di_-1.ct	SHAPE_in_vivo_Incar_top_37_percent_constrained.DBN	0.26682	0.505534	0.269572	0.510364	0.00440658		SARS_SF2_Di_-1.ct	Incar_DMS_invitro_Reactivities_top_37_percent_constrained.DBN	0.12148	0.256015	0.239079	0.581209	0.00439564		SARS_SF2_Di_-1.ct	Pyle_SHAPE_SARS2_Reactivity_top_37_percent_constrained.DBN	0.306338	0.45717	0.307343	0.457354	0.00400033		SARS_SF2_Di_-1.ct	Sun_Reactivities_top_37_percent_constrained.DBN	0.223172	0.575313	0.223172	0.575313	0.00448767
SARS_SF2_Di_-1.ct	Rouskin_DMS_SARS2_Reactivity_top_38_percent_constrained.DBN	0.115252	0.278714	0.225582	0.628618	0.00529913		SARS_SF2_Di_-1.ct	Incarnato_SHAPE_SARS2_in_vitro_Reactivity_top_38_percent_constrained.DBN	0.262403	0.523019	0.268628	0.535914	0.00497178		SARS_SF2_Di_-1.ct	SHAPE_in_vivo_Incar_top_38_percent_constrained.DBN	0.276054	0.516362	0.278901	0.521296	0.00486345		SARS_SF2_Di_-1.ct	Incar_DMS_invitro_Reactivities_top_38_percent_constrained.DBN	0.125667	0.26163	0.247319	0.593955	0.00489431		SARS_SF2_Di_-1.ct	Pyle_SHAPE_SARS2_Reactivity_top_38_percent_constrained.DBN	0.315802	0.467918	0.316837	0.468106	0.00444455		SARS_SF2_Di_-1.ct	Sun_Reactivities_top_38_percent_constrained.DBN	0.231775	0.587263	0.231775	0.587263	0.00505245
SARS_SF2_Di_-1.ct	Rouskin_DMS_SARS2_Reactivity_top_39_percent_constrained.DBN	0.120133	0.283446	0.235135	0.639291	0.00610765		SARS_SF2_Di_-1.ct	Incarnato_SHAPE_SARS2_in_vitro_Reactivity_top_39_percent_constrained.DBN	0.27072	0.534809	0.277142	0.547995	0.00466556		SARS_SF2_Di_-1.ct	SHAPE_in_vivo_Incar_top_39_percent_constrained.DBN	0.284829	0.527831	0.287767	0.532874	0.00472445		SARS_SF2_Di_-1.ct	Incar_DMS_invitro_Reactivities_top_39_percent_constrained.DBN	0.130083	0.267004	0.256011	0.606154	0.00526853		SARS_SF2_Di_-1.ct	Pyle_SHAPE_SARS2_Reactivity_top_39_percent_constrained.DBN	0.325437	0.478345	0.326505	0.478536	0.0046262		SARS_SF2_Di_-1.ct	Sun_Reactivities_top_39_percent_constrained.DBN	0.239576	0.600337	0.239576	0.600337	0.00468287
SARS_SF2_Di_-1.ct	Rouskin_DMS_SARS2_Reactivity_top_40_percent_constrained.DBN	0.125072	0.288098	0.244802	0.649783	0.00628092		SARS_SF2_Di_-1.ct	Incarnato_SHAPE_SARS2_in_vitro_Reactivity_top_40_percent_constrained.DBN	0.279381	0.546118	0.286008	0.559583	0.00496136		SARS_SF2_Di_-1.ct	SHAPE_in_vivo_Incar_top_40_percent_constrained.DBN	0.293547	0.539381	0.296575	0.544534	0.00479627		SARS_SF2_Di_-1.ct	Incar_DMS_invitro_Reactivities_top_40_percent_constrained.DBN	0.134557	0.272217	0.264815	0.61799	0.00544116		SARS_SF2_Di_-1.ct	Pyle_SHAPE_SARS2_Reactivity_top_40_percent_constrained.DBN	0.334155	0.490055	0.335251	0.490251	0.00428808		SARS_SF2_Di_-1.ct	Sun_Reactivities_top_40_percent_constrained.DBN	0.248294	0.612127	0.248294	0.612127	0.00533658
SARS_SF2_Di_-1.ct	Rouskin_DMS_SARS2_Reactivity_top_41_percent_constrained.DBN	0.129723	0.29315	0.253906	0.661179	0.0060195		SARS_SF2_Di_-1.ct	Incarnato_SHAPE_SARS2_in_vitro_Reactivity_top_41_percent_constrained.DBN	0.288844	0.556304	0.295696	0.57002	0.00552247		SARS_SF2_Di_-1.ct	SHAPE_in_vivo_Incar_top_41_percent_constrained.DBN	0.302896	0.550048	0.306021	0.555304	0.00524509		SARS_SF2_Di_-1.ct	Incar_DMS_invitro_Reactivities_top_41_percent_constrained.DBN	0.139203	0.27727	0.273959	0.629461	0.00575532		SARS_SF2_Di_-1.ct	Pyle_SHAPE_SARS2_Reactivity_top_41_percent_constrained.DBN	0.343504	0.500962	0.344631	0.501163	0.00470075		SARS_SF2_Di_-1.ct	Sun_Reactivities_top_41_percent_constrained.DBN	0.257069	0.623837	0.257069	0.623837	0.00547445
SARS_SF2_Di_-1.ct	Rouskin_DMS_SARS2_Reactivity_top_42_percent_constrained.DBN	0.134604	0.297883	0.26346	0.671852	0.00641873		SARS_SF2_Di_-1.ct	Incarnato_SHAPE_SARS2_in_vitro_Reactivity_top_42_percent_constrained.DBN	0.298824	0.565768	0.305913	0.579717	0.00592278		SARS_SF2_Di_-1.ct	SHAPE_in_vivo_Incar_top_42_percent_constrained.DBN	0.312532	0.560314	0.315756	0.565668	0.00550688		SARS_SF2_Di_-1.ct	Incar_DMS_invitro_Reactivities_top_42_percent_constrained.DBN	0.143504	0.282724	0.282425	0.641843	0.00543382		SARS_SF2_Di_-1.ct	Pyle_SHAPE_SARS2_Reactivity_top_42_percent_constrained.DBN	0.35228	0.512592	0.353435	0.512798	0.00451479		SARS_SF2_Di_-1.ct	Sun_Reactivities_top_42_percent_constrained.DBN	0.265787	0.635627	0.265787	0.635627	0.00554146
SARS_SF2_Di_-1.ct	Rouskin_DMS_SARS2_Reactivity_top_43_percent_constrained.DBN	0.139256	0.303016	0.272564	0.68343	0.00622208		SARS_SF2_Di_-1.ct	Incarnato_SHAPE_SARS2_in_vitro_Reactivity_top_43_percent_constrained.DBN	0.308689	0.575393	0.316012	0.589579	0.0059543		SARS_SF2_Di_-1.ct	SHAPE_in_vivo_Incar_top_43_percent_constrained.DBN	0.320792	0.572506	0.3241	0.577976	0.00482288		SARS_SF2_Di_-1.ct	Incar_DMS_invitro_Reactivities_top_43_percent_constrained.DBN	0.148093	0.287857	0.291455	0.653496	0.00590131		SARS_SF2_Di_-1.ct	Pyle_SHAPE_SARS2_Reactivity_top_43_percent_constrained.DBN	0.360654	0.524864	0.361837	0.525074	0.00441137		SARS_SF2_Di_-1.ct	Sun_Reactivities_top_43_percent_constrained.DBN	0.276054	0.645252	0.276054	0.645252	0.00662461
SARS_SF2_Di_-1.ct	Rouskin_DMS_SARS2_Reactivity_top_44_percent_constrained.DBN	0.144309	0.307507	0.282455	0.69356	0.00685998		SARS_SF2_Di_-1.ct	Incarnato_SHAPE_SARS2_in_vitro_Reactivity_top_44_percent_constrained.DBN	0.318784	0.584697	0.326346	0.599112	0.00619129		SARS_SF2_Di_-1.ct	SHAPE_in_vivo_Incar_top_44_percent_constrained.DBN	0.330141	0.583173	0.333546	0.588745	0.00556096		SARS_SF2_Di_-1.ct	Incar_DMS_invitro_Reactivities_top_44_percent_constrained.DBN	0.152509	0.29315	0.300147	0.665513	0.00578446		SARS_SF2_Di_-1.ct	Pyle_SHAPE_SARS2_Reactivity_top_44_percent_constrained.DBN	0.370118	0.535531	0.371332	0.535746	0.00508678		SARS_SF2_Di_-1.ct	Sun_Reactivities_top_44_percent_constrained.DBN	0.285403	0.65616	0.285403	0.65616	0.00613444
SARS_SF2_Di_-1.ct	Rouskin_DMS_SARS2_Reactivity_top_45_percent_constrained.DBN	0.148903	0.31264	0.291447	0.705137	0.00634045		SARS_SF2_Di_-1.ct	Incarnato_SHAPE_SARS2_in_vitro_Reactivity_top_45_percent_constrained.DBN	0.327732	0.595605	0.335506	0.610289	0.00559011		SARS_SF2_Di_-1.ct	SHAPE_in_vivo_Incar_top_45_percent_constrained.DBN	0.340522	0.592397	0.344034	0.598057	0.00627272		SARS_SF2_Di_-1.ct	Incar_DMS_invitro_Reactivities_top_45_percent_constrained.DBN	0.157098	0.298284	0.309177	0.677167	0.00611506		SARS_SF2_Di_-1.ct	Pyle_SHAPE_SARS2_Reactivity_top_45_percent_constrained.DBN	0.378893	0.547161	0.380136	0.54738	0.00481926		SARS_SF2_Di_-1.ct	Sun_Reactivities_top_45_percent_constrained.DBN	0.295498	0.666025	0.295498	0.666025	0.00672328
SARS_SF2_Di_-1.ct	Rouskin_DMS_SARS2_Reactivity_top_46_percent_constrained.DBN	0.154416	0.31657	0.302237	0.714001	0.00770419		SARS_SF2_Di_-1.ct	Incarnato_SHAPE_SARS2_in_vitro_Reactivity_top_46_percent_constrained.DBN	0.33731	0.60563	0.345311	0.620562	0.00608501		SARS_SF2_Di_-1.ct	SHAPE_in_vivo_Incar_top_46_percent_constrained.DBN	0.349986	0.602903	0.353596	0.608664	0.00581964		SARS_SF2_Di_-1.ct	Incar_DMS_invitro_Reactivities_top_46_percent_constrained.DBN	0.162145	0.302695	0.319111	0.687181	0.00682605		SARS_SF2_Di_-1.ct	Pyle_SHAPE_SARS2_Reactivity_top_46_percent_constrained.DBN	0.388299	0.557988	0.389573	0.558212	0.00526797		SARS_SF2_Di_-1.ct	Sun_Reactivities_top_46_percent_constrained.DBN	0.304904	0.676853	0.304904	0.676853	0.00636672
SARS_SF2_Di_-1.ct	Rouskin_DMS_SARS2_Reactivity_top_47_percent_constrained.DBN	0.159182	0.321463	0.311566	0.725036	0.00676385		SARS_SF2_Di_-1.ct	Incarnato_SHAPE_SARS2_in_vitro_Reactivity_top_47_percent_constrained.DBN	0.346888	0.615656	0.355117	0.630835	0.00618575		SARS_SF2_Di_-1.ct	SHAPE_in_vivo_Incar_top_47_percent_constrained.DBN	0.359507	0.61333	0.363215	0.61919	0.00595617		SARS_SF2_Di_-1.ct	Incar_DMS_invitro_Reactivities_top_47_percent_constrained.DBN	0.167537	0.306705	0.329721	0.696286	0.00738806		SARS_SF2_Di_-1.ct	Pyle_SHAPE_SARS2_Reactivity_top_47_percent_constrained.DBN	0.39782	0.568576	0.399125	0.568804	0.00543339		SARS_SF2_Di_-1.ct	Sun_Reactivities_top_47_percent_constrained.DBN	0.314654	0.687199	0.314654	0.687199	0.00670054
SARS_SF2_Di_-1.ct	Rouskin_DMS_SARS2_Reactivity_top_48_percent_constrained.DBN	0.16458	0.325473	0.322131	0.734081	0.00775583		SARS_SF2_Di_-1.ct	Incarnato_SHAPE_SARS2_in_vitro_Reactivity_top_48_percent_constrained.DBN	0.357098	0.624799	0.365569	0.640204	0.00669111		SARS_SF2_Di_-1.ct	SHAPE_in_vivo_Incar_top_48_percent_constrained.DBN	0.369544	0.623035	0.373356	0.628988	0.00637845		SARS_SF2_Di_-1.ct	Incar_DMS_invitro_Reactivities_top_48_percent_constrained.DBN	0.172182	0.311678	0.338864	0.707575	0.00646953		SARS_SF2_Di_-1.ct	Pyle_SHAPE_SARS2_Reactivity_top_48_percent_constrained.DBN	0.406825	0.579965	0.40816	0.580197	0.00524174		SARS_SF2_Di_-1.ct	Sun_Reactivities_top_48_percent_constrained.DBN	0.324462	0.697466	0.324462	0.697466	0.00684064
SARS_SF2_Di_-1.ct	Rouskin_DMS_SARS2_Reactivity_top_49_percent_constrained.DBN	0.169461	0.330205	0.331685	0.744754	0.00711522		SARS_SF2_Di_-1.ct	Incarnato_SHAPE_SARS2_in_vitro_Reactivity_top_49_percent_constrained.DBN	0.367709	0.633381	0.376431	0.648997	0.00704976		SARS_SF2_Di_-1.ct	SHAPE_in_vivo_Incar_top_49_percent_constrained.DBN	0.379409	0.63298	0.383323	0.639028	0.00636918		SARS_SF2_Di_-1.ct	Incar_DMS_invitro_Reactivities_top_49_percent_constrained.DBN	0.176828	0.316731	0.348008	0.719046	0.00657441		SARS_SF2_Di_-1.ct	Pyle_SHAPE_SARS2_Reactivity_top_49_percent_constrained.DBN	0.415888	0.591193	0.417252	0.591431	0.00537726		SARS_SF2_Di_-1.ct	Sun_Reactivities_top_49_percent_constrained.DBN	0.334213	0.707812	0.334213	0.707812	0.00690152
SARS_SF2_Di_-1.ct	Rouskin_DMS_SARS2_Reactivity_top_50_percent_constrained.DBN	0.174802	0.334296	0.342138	0.75398	0.00788132		SARS_SF2_Di_-1.ct	Incarnato_SHAPE_SARS2_in_vitro_Reactivity_top_50_percent_constrained.DBN	0.37809	0.642284	0.387059	0.65812	0.00699428		SARS_SF2_Di_-1.ct	SHAPE_in_vivo_Incar_top_50_percent_constrained.DBN	0.389045	0.643327	0.393058	0.649474	0.00632274		SARS_SF2_Di_-1.ct	Incar_DMS_invitro_Reactivities_top_50_percent_constrained.DBN	0.182506	0.32034	0.359183	0.72724	0.00812696		SARS_SF2_Di_-1.ct	Pyle_SHAPE_SARS2_Reactivity_top_50_percent_constrained.DBN	0.42581	0.601219	0.427207	0.60146	0.00598761		SARS_SF2_Di_-1.ct	Sun_Reactivities_top_50_percent_constrained.DBN	0.344078	0.718078	0.344078	0.718078	0.007084
SARS_SF2_Di_-1.ct	Rouskin_DMS_SARS2_Reactivity_top_51_percent_constrained.DBN	0.179913	0.338787	0.352141	0.76411	0.00764368		SARS_SF2_Di_-1.ct	Incarnato_SHAPE_SARS2_in_vitro_Reactivity_top_51_percent_constrained.DBN	0.387841	0.651989	0.397041	0.668064	0.00666848		SARS_SF2_Di_-1.ct	SHAPE_in_vivo_Incar_top_51_percent_constrained.DBN	0.398623	0.653673	0.402735	0.659919	0.00638619		SARS_SF2_Di_-1.ct	Incar_DMS_invitro_Reactivities_top_51_percent_constrained.DBN	0.187611	0.324671	0.369229	0.737072	0.00740483		SARS_SF2_Di_-1.ct	Pyle_SHAPE_SARS2_Reactivity_top_51_percent_constrained.DBN	0.434184	0.613491	0.435608	0.613737	0.00515626		SARS_SF2_Di_-1.ct	Sun_Reactivities_top_51_percent_constrained.DBN	0.354345	0.727703	0.354345	0.727703	0.00747111
SARS_SF2_Di_-1.ct	Rouskin_DMS_SARS2_Reactivity_top_52_percent_constrained.DBN	0.185024	0.343199	0.362145	0.774059	0.0077432		SARS_SF2_Di_-1.ct	Incarnato_SHAPE_SARS2_in_vitro_Reactivity_top_52_percent_constrained.DBN	0.397534	0.661854	0.406964	0.678172	0.00672956		SARS_SF2_Di_-1.ct	SHAPE_in_vivo_Incar_top_52_percent_constrained.DBN	0.408546	0.663539	0.41276	0.669879	0.00671548		SARS_SF2_Di_-1.ct	Incar_DMS_invitro_Reactivities_top_52_percent_constrained.DBN	0.192716	0.329082	0.379275	0.747087	0.00750544		SARS_SF2_Di_-1.ct	Pyle_SHAPE_SARS2_Reactivity_top_52_percent_constrained.DBN	0.442673	0.625521	0.444125	0.625772	0.0053294		SARS_SF2_Di_-1.ct	Sun_Reactivities_top_52_percent_constrained.DBN	0.364956	0.736846	0.364956	0.736846	0.00781856
SARS_SF2_Di_-1.ct	Rouskin_DMS_SARS2_Reactivity_top_53_percent_constrained.DBN	0.190077	0.34769	0.372036	0.78419	0.0077564		SARS_SF2_Di_-1.ct	Incarnato_SHAPE_SARS2_in_vitro_Reactivity_top_53_percent_constrained.DBN	0.40803	0.670597	0.417709	0.68713	0.00738329		SARS_SF2_Di_-1.ct	SHAPE_in_vivo_Incar_top_53_percent_constrained.DBN	0.419673	0.67172	0.424002	0.678138	0.0076235		SARS_SF2_Di_-1.ct	Incar_DMS_invitro_Reactivities_top_53_percent_constrained.DBN	0.197878	0.333333	0.389434	0.756737	0.00768781		SARS_SF2_Di_-1.ct	Pyle_SHAPE_SARS2_Reactivity_top_53_percent_constrained.DBN	0.452423	0.635868	0.453907	0.636123	0.00622286		SARS_SF2_Di_-1.ct	Sun_Reactivities_top_53_percent_constrained.DBN	0.375968	0.745428	0.375968	0.745428	0.0082089
SARS_SF2_Di_-1.ct	Rouskin_DMS_SARS2_Reactivity_top_54_percent_constrained.DBN	0.195016	0.352422	0.381702	0.794863	0.00768328		SARS_SF2_Di_-1.ct	Incarnato_SHAPE_SARS2_in_vitro_Reactivity_top_54_percent_constrained.DBN	0.419157	0.678457	0.4291	0.695184	0.00791884		SARS_SF2_Di_-1.ct	SHAPE_in_vivo_Incar_top_54_percent_constrained.DBN	0.429653	0.681505	0.434085	0.688016	0.00693717		SARS_SF2_Di_-1.ct	Incar_DMS_invitro_Reactivities_top_54_percent_constrained.DBN	0.203327	0.337263	0.400158	0.765659	0.00821059		SARS_SF2_Di_-1.ct	Pyle_SHAPE_SARS2_Reactivity_top_54_percent_constrained.DBN	0.462747	0.645332	0.464265	0.645591	0.00668698		SARS_SF2_Di_-1.ct	Sun_Reactivities_top_54_percent_constrained.DBN	0.38698	0.75401	0.38698	0.75401	0.00830341
SARS_SF2_Di_-1.ct	Rouskin_DMS_SARS2_Reactivity_top_55_percent_constrained.DBN	0.200701	0.356031	0.392829	0.803003	0.00893529		SARS_SF2_Di_-1.ct	Incarnato_SHAPE_SARS2_in_vitro_Reactivity_top_55_percent_constrained.DBN	0.430284	0.686317	0.440491	0.703238	0.00801058		SARS_SF2_Di_-1.ct	SHAPE_in_vivo_Incar_top_55_percent_constrained.DBN	0.439289	0.691771	0.44382	0.698381	0.00679886		SARS_SF2_Di_-1.ct	Incar_DMS_invitro_Reactivities_top_55_percent_constrained.DBN	0.208317	0.341755	0.409979	0.775856	0.00761931		SARS_SF2_Di_-1.ct	Pyle_SHAPE_SARS2_Reactivity_top_55_percent_constrained.DBN	0.472096	0.65624	0.473645	0.656503	0.00615779		SARS_SF2_Di_-1.ct	Sun_Reactivities_top_55_percent_constrained.DBN	0.39805	0.762512	0.39805	0.762512	0.00844077
SARS_SF2_Di_-1.ct	Rouskin_DMS_SARS2_Reactivity_top_56_percent_constrained.DBN	0.205984	0.360202	0.40317	0.81241	0.00840077		SARS_SF2_Di_-1.ct	Incarnato_SHAPE_SARS2_in_vitro_Reactivity_top_56_percent_constrained.DBN	0.44078	0.695059	0.451236	0.712196	0.00765262		SARS_SF2_Di_-1.ct	SHAPE_in_vivo_Incar_top_56_percent_constrained.DBN	0.449441	0.701315	0.454077	0.708016	0.00726191		SARS_SF2_Di_-1.ct	Incar_DMS_invitro_Reactivities_top_56_percent_constrained.DBN	0.213479	0.346086	0.420138	0.785688	0.00798193		SARS_SF2_Di_-1.ct	Pyle_SHAPE_SARS2_Reactivity_top_56_percent_constrained.DBN	0.481675	0.666747	0.483255	0.667014	0.00640991		SARS_SF2_Di_-1.ct	Sun_Reactivities_top_56_percent_constrained.DBN	0.40889	0.771335	0.40889	0.771335	0.00836147
SARS_SF2_Di_-1.ct	Rouskin_DMS_SARS2_Reactivity_top_57_percent_constrained.DBN	0.212645	0.362448	0.416208	0.817475	0.0106583		SARS_SF2_Di_-1.ct	Incarnato_SHAPE_SARS2_in_vitro_Reactivity_top_57_percent_constrained.DBN	0.451391	0.703641	0.462099	0.720989	0.00783178		SARS_SF2_Di_-1.ct	SHAPE_in_vivo_Incar_top_57_percent_constrained.DBN	0.460109	0.710138	0.464855	0.716923	0.00772717		SARS_SF2_Di_-1.ct	Incar_DMS_invitro_Reactivities_top_57_percent_constrained.DBN	0.219214	0.349535	0.431426	0.793518	0.00895719		SARS_SF2_Di_-1.ct	Pyle_SHAPE_SARS2_Reactivity_top_57_percent_constrained.DBN	0.491483	0.676933	0.493095	0.677205	0.00666371		SARS_SF2_Di_-1.ct	Sun_Reactivities_top_57_percent_constrained.DBN	0.419329	0.780719	0.419329	0.780719	0.00814974
SARS_SF2_Di_-1.ct	Rouskin_DMS_SARS2_Reactivity_top_58_percent_constrained.DBN	0.218273	0.366137	0.427223	0.825796	0.0090961		SARS_SF2_Di_-1.ct	Incarnato_SHAPE_SARS2_in_vitro_Reactivity_top_58_percent_constrained.DBN	0.463034	0.71078	0.474018	0.728304	0.00868097		SARS_SF2_Di_-1.ct	SHAPE_in_vivo_Incar_top_58_percent_constrained.DBN	0.471179	0.718399	0.476039	0.725263	0.00811125		SARS_SF2_Di_-1.ct	Incar_DMS_invitro_Reactivities_top_58_percent_constrained.DBN	0.22472	0.353385	0.442262	0.802258	0.00869362		SARS_SF2_Di_-1.ct	Pyle_SHAPE_SARS2_Reactivity_top_58_percent_constrained.DBN	0.500602	0.688162	0.502244	0.688438	0.00629886		SARS_SF2_Di_-1.ct	Sun_Reactivities_top_58_percent_constrained.DBN	0.430857	0.788579	0.430857	0.788579	0.00909116
SARS_SF2_Di_-1.ct	Rouskin_DMS_SARS2_Reactivity_top_59_percent_constrained.DBN	0.224302	0.369346	0.439024	0.833032	0.00983122		SARS_SF2_Di_-1.ct	Incarnato_SHAPE_SARS2_in_vitro_Reactivity_top_59_percent_constrained.DBN	0.474161	0.71864	0.485409	0.736358	0.00838784		SARS_SF2_Di_-1.ct	SHAPE_in_vivo_Incar_top_59_percent_constrained.DBN	0.481388	0.727863	0.486353	0.734818	0.00757939		SARS_SF2_Di_-1.ct	Incar_DMS_invitro_Reactivities_top_59_percent_constrained.DBN	0.230513	0.356753	0.453663	0.809905	0.0092336		SARS_SF2_Di_-1.ct	Pyle_SHAPE_SARS2_Reactivity_top_59_percent_constrained.DBN	0.509492	0.699631	0.511164	0.699912	0.00624274		SARS_SF2_Di_-1.ct	Sun_Reactivities_top_59_percent_constrained.DBN	0.442099	0.79684	0.442099	0.79684	0.00895788
SARS_SF2_Di_-1.ct	Rouskin_DMS_SARS2_Reactivity_top_60_percent_constrained.DBN	0.229987	0.372955	0.450152	0.841172	0.00936001		SARS_SF2_Di_-1.ct	Incarnato_SHAPE_SARS2_in_vitro_Reactivity_top_60_percent_constrained.DBN	0.485288	0.7265	0.4968	0.744412	0.00847959		SARS_SF2_Di_-1.ct	SHAPE_in_vivo_Incar_top_60_percent_constrained.DBN	0.492572	0.735964	0.497653	0.742996	0.00839568		SARS_SF2_Di_-1.ct	Incar_DMS_invitro_Reactivities_top_60_percent_constrained.DBN	0.236077	0.360523	0.464612	0.818463	0.00896161		SARS_SF2_Di_-1.ct	Pyle_SHAPE_SARS2_Reactivity_top_60_percent_constrained.DBN	0.51821	0.711421	0.51991	0.711707	0.00622508		SARS_SF2_Di_-1.ct	Sun_Reactivities_top_60_percent_constrained.DBN	0.4538	0.804459	0.4538	0.804459	0.00941266
SARS_SF2_Di_-1.ct	Rouskin_DMS_SARS2_Reactivity_top_61_percent_constrained.DBN	0.236304	0.375682	0.462515	0.847323	0.0104761		SARS_SF2_Di_-1.ct	Incarnato_SHAPE_SARS2_in_vitro_Reactivity_top_61_percent_constrained.DBN	0.495498	0.735643	0.507251	0.75378	0.00787816		SARS_SF2_Di_-1.ct	SHAPE_in_vivo_Incar_top_61_percent_constrained.DBN	0.503413	0.744546	0.508605	0.75166	0.00823224		SARS_SF2_Di_-1.ct	Incar_DMS_invitro_Reactivities_top_61_percent_constrained.DBN	0.241755	0.364052	0.475787	0.826475	0.00923592		SARS_SF2_Di_-1.ct	Pyle_SHAPE_SARS2_Reactivity_top_61_percent_constrained.DBN	0.52819	0.721367	0.529923	0.721656	0.0072257		SARS_SF2_Di_-1.ct	Sun_Reactivities_top_61_percent_constrained.DBN	0.464984	0.812801	0.464984	0.812801	0.00909069
SARS_SF2_Di_-1.ct	Rouskin_DMS_SARS2_Reactivity_top_62_percent_constrained.DBN	0.242104	0.379211	0.473868	0.855282	0.00970928		SARS_SF2_Di_-1.ct	Incarnato_SHAPE_SARS2_in_vitro_Reactivity_top_62_percent_constrained.DBN	0.50651	0.743664	0.518525	0.761999	0.00859044		SARS_SF2_Di_-1.ct	SHAPE_in_vivo_Incar_top_62_percent_constrained.DBN	0.514138	0.753288	0.519441	0.760486	0.00824076		SARS_SF2_Di_-1.ct	Incar_DMS_invitro_Reactivities_top_62_percent_constrained.DBN	0.247433	0.367661	0.486962	0.834669	0.00932749		SARS_SF2_Di_-1.ct	Pyle_SHAPE_SARS2_Reactivity_top_62_percent_constrained.DBN	0.537998	0.731553	0.539763	0.731846	0.00720139		SARS_SF2_Di_-1.ct	Sun_Reactivities_top_62_percent_constrained.DBN	0.477029	0.819939	0.477029	0.819939	0.00987595
SARS_SF2_Di_-1.ct	Rouskin_DMS_SARS2_Reactivity_top_63_percent_constrained.DBN	0.248249	0.382178	0.485894	0.861975	0.0103666		SARS_SF2_Di_-1.ct	Incarnato_SHAPE_SARS2_in_vitro_Reactivity_top_63_percent_constrained.DBN	0.517408	0.751845	0.529681	0.770381	0.00859447		SARS_SF2_Di_-1.ct	SHAPE_in_vivo_Incar_top_63_percent_constrained.DBN	0.525839	0.760667	0.531263	0.767935	0.00907798		SARS_SF2_Di_-1.ct	Incar_DMS_invitro_Reactivities_top_63_percent_constrained.DBN	0.253341	0.370869	0.498589	0.841952	0.00978903		SARS_SF2_Di_-1.ct	Pyle_SHAPE_SARS2_Reactivity_top_63_percent_constrained.DBN	0.547749	0.741899	0.549545	0.742197	0.00726053		SARS_SF2_Di_-1.ct	Sun_Reactivities_top_63_percent_constrained.DBN	0.489074	0.827077	0.489074	0.827077	0.00996193
SARS_SF2_Di_-1.ct	Rouskin_DMS_SARS2_Reactivity_top_64_percent_constrained.DBN	0.25491	0.384424	0.498932	0.867041	0.0113046		SARS_SF2_Di_-1.ct	Incarnato_SHAPE_SARS2_in_vitro_Reactivity_top_64_percent_constrained.DBN	0.528592	0.759625	0.541131	0.778353	0.00891192		SARS_SF2_Di_-1.ct	SHAPE_in_vivo_Incar_top_64_percent_constrained.DBN	0.53645	0.76957	0.541983	0.776923	0.00832884		SARS_SF2_Di_-1.ct	Incar_DMS_invitro_Reactivities_top_64_percent_constrained.DBN	0.259249	0.374158	0.510216	0.849417	0.00987583		SARS_SF2_Di_-1.ct	Pyle_SHAPE_SARS2_Reactivity_top_64_percent_constrained.DBN	0.558761	0.750401	0.560594	0.750702	0.0082941		SARS_SF2_Di_-1.ct	Sun_Reactivities_top_64_percent_constrained.DBN	0.501118	0.834216	0.501118	0.834216	0.0100479
SARS_SF2_Di_-1.ct	Rouskin_DMS_SARS2_Reactivity_top_65_percent_constrained.DBN	0.261341	0.386991	0.511521	0.872829	0.0109876		SARS_SF2_Di_-1.ct	Incarnato_SHAPE_SARS2_in_vitro_Reactivity_top_65_percent_constrained.DBN	0.539547	0.767725	0.552346	0.786654	0.0088222		SARS_SF2_Di_-1.ct	SHAPE_in_vivo_Incar_top_65_percent_constrained.DBN	0.547118	0.778473	0.552761	0.785911	0.00847073		SARS_SF2_Di_-1.ct	Incar_DMS_invitro_Reactivities_top_65_percent_constrained.DBN	0.265615	0.376724	0.522745	0.855244	0.0107159		SARS_SF2_Di_-1.ct	Pyle_SHAPE_SARS2_Reactivity_top_65_percent_constrained.DBN	0.568454	0.760828	0.570319	0.761133	0.00740197		SARS_SF2_Di_-1.ct	Sun_Reactivities_top_65_percent_constrained.DBN	0.513622	0.840712	0.513622	0.840712	0.0105119
SARS_SF2_Di_-1.ct	Rouskin_DMS_SARS2_Reactivity_top_66_percent_constrained.DBN	0.26783	0.389477	0.524222	0.878437	0.011157		SARS_SF2_Di_-1.ct	Incarnato_SHAPE_SARS2_in_vitro_Reactivity_top_66_percent_constrained.DBN	0.550846	0.775345	0.563913	0.794461	0.00918964		SARS_SF2_Di_-1.ct	SHAPE_in_vivo_Incar_top_66_percent_constrained.DBN	0.557671	0.787456	0.563424	0.79498	0.00847634		SARS_SF2_Di_-1.ct	Incar_DMS_invitro_Reactivities_top_66_percent_constrained.DBN	0.272211	0.37905	0.535726	0.860524	0.0111706		SARS_SF2_Di_-1.ct	Pyle_SHAPE_SARS2_Reactivity_top_66_percent_constrained.DBN	0.578377	0.770853	0.580274	0.771163	0.00767701		SARS_SF2_Di_-1.ct	Sun_Reactivities_top_66_percent_constrained.DBN	0.525896	0.84753	0.525896	0.84753	0.0104027
SARS_SF2_Di_-1.ct	Rouskin_DMS_SARS2_Reactivity_top_67_percent_constrained.DBN	0.274032	0.392445	0.536361	0.88513	0.0107445		SARS_SF2_Di_-1.ct	Incarnato_SHAPE_SARS2_in_vitro_Reactivity_top_67_percent_constrained.DBN	0.561457	0.783927	0.574775	0.803254	0.00872539		SARS_SF2_Di_-1.ct	SHAPE_in_vivo_Incar_top_67_percent_constrained.DBN	0.568913	0.795476	0.574781	0.803077	0.00912111		SARS_SF2_Di_-1.ct	Incar_DMS_invitro_Reactivities_top_67_percent_constrained.DBN	0.278119	0.382259	0.547353	0.867808	0.0100896		SARS_SF2_Di_-1.ct	Pyle_SHAPE_SARS2_Reactivity_top_67_percent_constrained.DBN	0.589217	0.779596	0.59115	0.779909	0.00848214		SARS_SF2_Di_-1.ct	Sun_Reactivities_top_67_percent_constrained.DBN	0.538342	0.854107	0.538342	0.854107	0.0106304
SARS_SF2_Di_-1.ct	Rouskin_DMS_SARS2_Reactivity_top_68_percent_constrained.DBN	0.280464	0.395011	0.548949	0.890919	0.0112153		SARS_SF2_Di_-1.ct	Incarnato_SHAPE_SARS2_in_vitro_Reactivity_top_68_percent_constrained.DBN	0.572412	0.792028	0.58599	0.811555	0.00910146		SARS_SF2_Di_-1.ct	SHAPE_in_vivo_Incar_top_68_percent_constrained.DBN	0.58113	0.802133	0.587124	0.809798	0.00999518		SARS_SF2_Di_-1.ct	Incar_DMS_invitro_Reactivities_top_68_percent_constrained.DBN	0.284256	0.385226	0.559431	0.874545	0.0105629		SARS_SF2_Di_-1.ct	Pyle_SHAPE_SARS2_Reactivity_top_68_percent_constrained.DBN	0.599656	0.78898	0.601623	0.789296	0.00826631		SARS_SF2_Di_-1.ct	Sun_Reactivities_top_68_percent_constrained.DBN	0.551821	0.85924	0.551821	0.85924	0.0115814
SARS_SF2_Di_-1.ct	Rouskin_DMS_SARS2_Reactivity_top_69_percent_constrained.DBN	0.286723	0.397818	0.5612	0.89725	0.0109925		SARS_SF2_Di_-1.ct	Incarnato_SHAPE_SARS2_in_vitro_Reactivity_top_69_percent_constrained.DBN	0.584858	0.798043	0.598732	0.817719	0.0104189		SARS_SF2_Di_-1.ct	SHAPE_in_vivo_Incar_top_69_percent_constrained.DBN	0.592142	0.810475	0.59825	0.818219	0.00910343		SARS_SF2_Di_-1.ct	Incar_DMS_invitro_Reactivities_top_69_percent_constrained.DBN	0.290622	0.387793	0.571961	0.880371	0.0110307		SARS_SF2_Di_-1.ct	Pyle_SHAPE_SARS2_Reactivity_top_69_percent_constrained.DBN	0.610209	0.798123	0.612211	0.798443	0.008454		SARS_SF2_Di_-1.ct	Sun_Reactivities_top_69_percent_constrained.DBN	0.564095	0.866057	0.564095	0.866057	0.0106301
SARS_SF2_Di_-1.ct	Rouskin_DMS_SARS2_Reactivity_top_70_percent_constrained.DBN	0.293327	0.400225	0.574126	0.902677	0.0116677		SARS_SF2_Di_-1.ct	Incarnato_SHAPE_SARS2_in_vitro_Reactivity_top_70_percent_constrained.DBN	0.596387	0.805342	0.610534	0.825197	0.00973898		SARS_SF2_Di_-1.ct	SHAPE_in_vivo_Incar_top_70_percent_constrained.DBN	0.603728	0.818014	0.609955	0.82583	0.00966667		SARS_SF2_Di_-1.ct	Incar_DMS_invitro_Reactivities_top_70_percent_constrained.DBN	0.296473	0.391161	0.583474	0.888019	0.0102244		SARS_SF2_Di_-1.ct	Pyle_SHAPE_SARS2_Reactivity_top_70_percent_constrained.DBN	0.620533	0.807668	0.622569	0.807992	0.00836912		SARS_SF2_Di_-1.ct	Sun_Reactivities_top_70_percent_constrained.DBN	0.576886	0.872153	0.576886	0.872153	0.0111552
SARS_SF2_Di_-1.ct	Rouskin_DMS_SARS2_Reactivity_top_71_percent_constrained.DBN	0.299931	0.402551	0.587052	0.907923	0.0117355		SARS_SF2_Di_-1.ct	Incarnato_SHAPE_SARS2_in_vitro_Reactivity_top_71_percent_constrained.DBN	0.60803	0.81248	0.622453	0.832512	0.00992307		SARS_SF2_Di_-1.ct	SHAPE_in_vivo_Incar_top_71_percent_constrained.DBN	0.615257	0.825634	0.621603	0.833522	0.00970841		SARS_SF2_Di_-1.ct	Incar_DMS_invitro_Reactivities_top_71_percent_constrained.DBN	0.302954	0.393568	0.59623	0.893481	0.0113967		SARS_SF2_Di_-1.ct	Pyle_SHAPE_SARS2_Reactivity_top_71_percent_constrained.DBN	0.630513	0.817613	0.632581	0.817941	0.00818977		SARS_SF2_Di_-1.ct	Sun_Reactivities_top_71_percent_constrained.DBN	0.589963	0.877847	0.589963	0.877847	0.0114797
SARS_SF2_Di_-1.ct	Rouskin_DMS_SARS2_Reactivity_top_72_percent_constrained.DBN	0.30688	0.404395	0.600652	0.912084	0.0124044		SARS_SF2_Di_-1.ct	Incarnato_SHAPE_SARS2_in_vitro_Reactivity_top_72_percent_constrained.DBN	0.620189	0.818896	0.634901	0.839086	0.0104449		SARS_SF2_Di_-1.ct	SHAPE_in_vivo_Incar_top_72_percent_constrained.DBN	0.627015	0.832932	0.633482	0.840891	0.00998914		SARS_SF2_Di_-1.ct	Incar_DMS_invitro_Reactivities_top_72_percent_constrained.DBN	0.309722	0.395653	0.60955	0.898216	0.011964		SARS_SF2_Di_-1.ct	Pyle_SHAPE_SARS2_Reactivity_top_72_percent_constrained.DBN	0.641124	0.826756	0.643227	0.827088	0.00880489		SARS_SF2_Di_-1.ct	Sun_Reactivities_top_72_percent_constrained.DBN	0.602753	0.883943	0.602753	0.883943	0.011306
SARS_SF2_Di_-1.ct	Rouskin_DMS_SARS2_Reactivity_top_73_percent_constrained.DBN	0.313369	0.406882	0.613353	0.917692	0.0116555		SARS_SF2_Di_-1.ct	Incarnato_SHAPE_SARS2_in_vitro_Reactivity_top_73_percent_constrained.DBN	0.632177	0.825553	0.647173	0.845907	0.0103808		SARS_SF2_Di_-1.ct	SHAPE_in_vivo_Incar_top_73_percent_constrained.DBN	0.638543	0.840552	0.64513	0.848583	0.00988383		SARS_SF2_Di_-1.ct	Incar_DMS_invitro_Reactivities_top_73_percent_constrained.DBN	0.315744	0.398701	0.621402	0.905135	0.010728		SARS_SF2_Di_-1.ct	Pyle_SHAPE_SARS2_Reactivity_top_73_percent_constrained.DBN	0.651792	0.835739	0.65393	0.836075	0.00894867		SARS_SF2_Di_-1.ct	Sun_Reactivities_top_73_percent_constrained.DBN	0.615888	0.889557	0.615888	0.889557	0.0116839
SARS_SF2_Di_-1.ct	Rouskin_DMS_SARS2_Reactivity_top_74_percent_constrained.DBN	0.320202	0.408887	0.626728	0.922214	0.0123349		SARS_SF2_Di_-1.ct	Incarnato_SHAPE_SARS2_in_vitro_Reactivity_top_74_percent_constrained.DBN	0.644451	0.831809	0.659738	0.852318	0.0107096		SARS_SF2_Di_-1.ct	SHAPE_in_vivo_Incar_top_74_percent_constrained.DBN	0.65076	0.847209	0.657472	0.855304	0.0105569		SARS_SF2_Di_-1.ct	Incar_DMS_invitro_Reactivities_top_74_percent_constrained.DBN	0.322455	0.400866	0.634609	0.910051	0.012019		SARS_SF2_Di_-1.ct	Pyle_SHAPE_SARS2_Reactivity_top_74_percent_constrained.DBN	0.663149	0.84376	0.665324	0.844099	0.00961742		SARS_SF2_Di_-1.ct	Sun_Reactivities_top_74_percent_constrained.DBN	0.628907	0.895332	0.628907	0.895332	0.011657
SARS_SF2_Di_-1.ct	Rouskin_DMS_SARS2_Reactivity_top_75_percent_constrained.DBN	0.327208	0.410731	0.640441	0.926375	0.0127029		SARS_SF2_Di_-1.ct	Incarnato_SHAPE_SARS2_in_vitro_Reactivity_top_75_percent_constrained.DBN	0.655922	0.839188	0.671481	0.859878	0.0100978		SARS_SF2_Di_-1.ct	SHAPE_in_vivo_Incar_top_75_percent_constrained.DBN	0.663149	0.853625	0.669989	0.861781	0.0107866		SARS_SF2_Di_-1.ct	Incar_DMS_invitro_Reactivities_top_75_percent_constrained.DBN	0.329338	0.402711	0.648154	0.914239	0.0123839		SARS_SF2_Di_-1.ct	Pyle_SHAPE_SARS2_Reactivity_top_75_percent_constrained.DBN	0.674333	0.852101	0.676545	0.852443	0.00956534		SARS_SF2_Di_-1.ct	Sun_Reactivities_top_75_percent_constrained.DBN	0.642329	0.900545	0.642329	0.900545	0.0120865
SARS_SF2_Di_-1.ct	Rouskin_DMS_SARS2_Reactivity_top_76_percent_constrained.DBN	0.333869	0.412977	0.653479	0.93144	0.0121442		SARS_SF2_Di_-1.ct	Incarnato_SHAPE_SARS2_in_vitro_Reactivity_top_76_percent_constrained.DBN	0.667106	0.846968	0.682931	0.86785	0.00993663		SARS_SF2_Di_-1.ct	SHAPE_in_vivo_Incar_top_76_percent_constrained.DBN	0.675366	0.860282	0.682332	0.868502	0.0107198		SARS_SF2_Di_-1.ct	Incar_DMS_invitro_Reactivities_top_76_percent_constrained.DBN	0.335991	0.404957	0.661248	0.919337	0.0120378		SARS_SF2_Di_-1.ct	Pyle_SHAPE_SARS2_Reactivity_top_76_percent_constrained.DBN	0.685001	0.861084	0.687248	0.86143	0.00922005		SARS_SF2_Di_-1.ct	Sun_Reactivities_top_76_percent_constrained.DBN	0.655922	0.905518	0.655922	0.905518	0.012309
SARS_SF2_Di_-1.ct	Rouskin_DMS_SARS2_Reactivity_top_77_percent_constrained.DBN	0.340875	0.414742	0.667191	0.93542	0.0128269		SARS_SF2_Di_-1.ct	Incarnato_SHAPE_SARS2_in_vitro_Reactivity_top_77_percent_constrained.DBN	0.678635	0.854267	0.694733	0.875329	0.0103306		SARS_SF2_Di_-1.ct	SHAPE_in_vivo_Incar_top_77_percent_constrained.DBN	0.687697	0.866779	0.694791	0.875061	0.0109021		SARS_SF2_Di_-1.ct	Incar_DMS_invitro_Reactivities_top_77_percent_constrained.DBN	0.342587	0.407202	0.67423	0.924436	0.0120002		SARS_SF2_Di_-1.ct	Pyle_SHAPE_SARS2_Reactivity_top_77_percent_constrained.DBN	0.696358	0.869185	0.698642	0.869534	0.00990722		SARS_SF2_Di_-1.ct	Sun_Reactivities_top_77_percent_constrained.DBN	0.669859	0.91001	0.669859	0.91001	0.0126832
SARS_SF2_Di_-1.ct	Rouskin_DMS_SARS2_Reactivity_top_78_percent_constrained.DBN	0.347996	0.416426	0.681128	0.939219	0.0130902		SARS_SF2_Di_-1.ct	Incarnato_SHAPE_SARS2_in_vitro_Reactivity_top_78_percent_constrained.DBN	0.690852	0.860603	0.70724	0.881821	0.0110286		SARS_SF2_Di_-1.ct	SHAPE_in_vivo_Incar_top_78_percent_constrained.DBN	0.699685	0.873757	0.706902	0.882105	0.0106832		SARS_SF2_Di_-1.ct	Incar_DMS_invitro_Reactivities_top_78_percent_constrained.DBN	0.349527	0.409047	0.687888	0.928623	0.0126835		SARS_SF2_Di_-1.ct	Pyle_SHAPE_SARS2_Reactivity_top_78_percent_constrained.DBN	0.7076	0.877366	0.709921	0.877718	0.00989946		SARS_SF2_Di_-1.ct	Sun_Reactivities_top_78_percent_constrained.DBN	0.68351	0.914902	0.68351	0.914902	0.0124891
SARS_SF2_Di_-1.ct	Rouskin_DMS_SARS2_Reactivity_top_79_percent_constrained.DBN	0.355002	0.418191	0.694841	0.943198	0.0129336		SARS_SF2_Di_-1.ct	Incarnato_SHAPE_SARS2_in_vitro_Reactivity_top_79_percent_constrained.DBN	0.702782	0.86734	0.719453	0.888725	0.010854		SARS_SF2_Di_-1.ct	SHAPE_in_vivo_Incar_top_79_percent_constrained.DBN	0.712016	0.880334	0.71936	0.888745	0.0110726		SARS_SF2_Di_-1.ct	Incar_DMS_invitro_Reactivities_top_79_percent_constrained.DBN	0.355951	0.411534	0.700531	0.934268	0.0118115		SARS_SF2_Di_-1.ct	Pyle_SHAPE_SARS2_Reactivity_top_79_percent_constrained.DBN	0.718555	0.885948	0.720911	0.886303	0.00974128		SARS_SF2_Di_-1.ct	Sun_Reactivities_top_79_percent_constrained.DBN	0.696874	0.920196	0.696874	0.920196	0.0122974
SARS_SF2_Di_-1.ct	Rouskin_DMS_SARS2_Reactivity_top_80_percent_constrained.DBN	0.362122	0.419795	0.708778	0.946816	0.013196		SARS_SF2_Di_-1.ct	Incarnato_SHAPE_SARS2_in_vitro_Reactivity_top_80_percent_constrained.DBN	0.715056	0.873596	0.732018	0.895135	0.0112477		SARS_SF2_Di_-1.ct	SHAPE_in_vivo_Incar_top_80_percent_constrained.DBN	0.724405	0.88675	0.731877	0.895223	0.0112052		SARS_SF2_Di_-1.ct	Incar_DMS_invitro_Reactivities_top_80_percent_constrained.DBN	0.36226	0.414261	0.712947	0.940459	0.0116774		SARS_SF2_Di_-1.ct	Pyle_SHAPE_SARS2_Reactivity_top_80_percent_constrained.DBN	0.729223	0.895011	0.731615	0.89537	0.00958332		SARS_SF2_Di_-1.ct	Sun_Reactivities_top_80_percent_constrained.DBN	0.710009	0.92581	0.710009	0.92581	0.0121601
SARS_SF2_Di_-1.ct	Rouskin_DMS_SARS2_Reactivity_top_81_percent_constrained.DBN	0.36953	0.420998	0.723278	0.94953	0.0137675		SARS_SF2_Di_-1.ct	Incarnato_SHAPE_SARS2_in_vitro_Reactivity_top_81_percent_constrained.DBN	0.727674	0.879371	0.744936	0.901052	0.0116394		SARS_SF2_Di_-1.ct	SHAPE_in_vivo_Incar_top_81_percent_constrained.DBN	0.73731	0.892445	0.744915	0.900972	0.011747		SARS_SF2_Di_-1.ct	Incar_DMS_invitro_Reactivities_top_81_percent_constrained.DBN	0.368626	0.416827	0.725477	0.946286	0.0118566		SARS_SF2_Di_-1.ct	Pyle_SHAPE_SARS2_Reactivity_top_81_percent_constrained.DBN	0.741325	0.901989	0.743756	0.902351	0.0109562		SARS_SF2_Di_-1.ct	Sun_Reactivities_top_81_percent_constrained.DBN	0.723946	0.930302	0.723946	0.930302	0.0129661
SARS_SF2_Di_-1.ct	Rouskin_DMS_SARS2_Reactivity_top_82_percent_constrained.DBN	0.376536	0.422762	0.73699	0.953509	0.013075		SARS_SF2_Di_-1.ct	Incarnato_SHAPE_SARS2_in_vitro_Reactivity_top_82_percent_constrained.DBN	0.739719	0.885948	0.757266	0.907791	0.0111935		SARS_SF2_Di_-1.ct	SHAPE_in_vivo_Incar_top_82_percent_constrained.DBN	0.749699	0.898861	0.757432	0.907449	0.0113582		SARS_SF2_Di_-1.ct	Incar_DMS_invitro_Reactivities_top_82_percent_constrained.DBN	0.376255	0.417709	0.74049	0.948288	0.0142366		SARS_SF2_Di_-1.ct	Pyle_SHAPE_SARS2_Reactivity_top_82_percent_constrained.DBN	0.753427	0.909047	0.755898	0.909412	0.0110419		SARS_SF2_Di_-1.ct	Sun_Reactivities_top_82_percent_constrained.DBN	0.737654	0.935114	0.737654	0.935114	0.0128186
SARS_SF2_Di_-1.ct	Rouskin_DMS_SARS2_Reactivity_top_83_percent_constrained.DBN	0.383657	0.424447	0.750927	0.957308	0.0133423		SARS_SF2_Di_-1.ct	Incarnato_SHAPE_SARS2_in_vitro_Reactivity_top_83_percent_constrained.DBN	0.752165	0.891963	0.770008	0.913955	0.0116451		SARS_SF2_Di_-1.ct	SHAPE_in_vivo_Incar_top_83_percent_constrained.DBN	0.762604	0.904556	0.77047	0.913198	0.0119065		SARS_SF2_Di_-1.ct	Incar_DMS_invitro_Reactivities_top_83_percent_constrained.DBN	0.383424	0.419153	0.7546	0.951566	0.0134265		SARS_SF2_Di_-1.ct	Pyle_SHAPE_SARS2_Reactivity_top_83_percent_constrained.DBN	0.765644	0.915865	0.768155	0.916232	0.0112301		SARS_SF2_Di_-1.ct	Sun_Reactivities_top_83_percent_constrained.DBN	0.750903	0.940568	0.750903	0.940568	0.0124618
SARS_SF2_Di_-1.ct	Rouskin_DMS_SARS2_Reactivity_top_84_percent_constrained.DBN	0.391007	0.42573	0.765314	0.960203	0.0138143		SARS_SF2_Di_-1.ct	Incarnato_SHAPE_SARS2_in_vitro_Reactivity_top_84_percent_constrained.DBN	0.76507	0.897337	0.783219	0.919461	0.0121472		SARS_SF2_Di_-1.ct	SHAPE_in_vivo_Incar_top_84_percent_constrained.DBN	0.775337	0.910491	0.783334	0.91919	0.0118248		SARS_SF2_Di_-1.ct	Incar_DMS_invitro_Reactivities_top_84_percent_constrained.DBN	0.390364	0.420998	0.768258	0.955754	0.0130541		SARS_SF2_Di_-1.ct	Pyle_SHAPE_SARS2_Reactivity_top_84_percent_constrained.DBN	0.777803	0.922762	0.780354	0.923132	0.0112616		SARS_SF2_Di_-1.ct	Sun_Reactivities_top_84_percent_constrained.DBN	0.764325	0.945861	0.764325	0.945861	0.0126947
SARS_SF2_Di_-1.ct	Rouskin_DMS_SARS2_Reactivity_top_85_percent_constrained.DBN	0.398645	0.426612	0.780263	0.962192	0.0143837		SARS_SF2_Di_-1.ct	Incarnato_SHAPE_SARS2_in_vitro_Reactivity_top_85_percent_constrained.DBN	0.777058	0.903994	0.795491	0.926282	0.0113671		SARS_SF2_Di_-1.ct	SHAPE_in_vivo_Incar_top_85_percent_constrained.DBN	0.788357	0.916025	0.796488	0.924777	0.0121646		SARS_SF2_Di_-1.ct	Incar_DMS_invitro_Reactivities_top_85_percent_constrained.DBN	0.397534	0.422441	0.782368	0.959031	0.0135319		SARS_SF2_Di_-1.ct	Pyle_SHAPE_SARS2_Reactivity_top_85_percent_constrained.DBN	0.790307	0.929259	0.792899	0.929632	0.0116619		SARS_SF2_Di_-1.ct	Sun_Reactivities_top_85_percent_constrained.DBN	0.778377	0.950192	0.778377	0.950192	0.0133523
SARS_SF2_Di_-1.ct	Rouskin_DMS_SARS2_Reactivity_top_86_percent_constrained.DBN	0.405995	0.427976	0.79465	0.965268	0.0138872		SARS_SF2_Di_-1.ct	Incarnato_SHAPE_SARS2_in_vitro_Reactivity_top_86_percent_constrained.DBN	0.789389	0.91017	0.808115	0.93261	0.0117733		SARS_SF2_Di_-1.ct	SHAPE_in_vivo_Incar_top_86_percent_constrained.DBN	0.801377	0.921559	0.809642	0.930364	0.0122381		SARS_SF2_Di_-1.ct	Incar_DMS_invitro_Reactivities_top_86_percent_constrained.DBN	0.404933	0.423645	0.79693	0.961763	0.0140047		SARS_SF2_Di_-1.ct	Pyle_SHAPE_SARS2_Reactivity_top_86_percent_constrained.DBN	0.803212	0.935114	0.805846	0.935489	0.0121122		SARS_SF2_Di_-1.ct	Sun_Reactivities_top_86_percent_constrained.DBN	0.792028	0.955085	0.792028	0.955085	0.0130376
SARS_SF2_Di_-1.ct	Rouskin_DMS_SARS2_Reactivity_top_87_percent_constrained.DBN	0.413173	0.4295	0.8087	0.968705	0.01361		SARS_SF2_Di_-1.ct	Incarnato_SHAPE_SARS2_in_vitro_Reactivity_top_87_percent_constrained.DBN	0.802294	0.915544	0.821326	0.938116	0.0123936		SARS_SF2_Di_-1.ct	SHAPE_in_vivo_Incar_top_87_percent_constrained.DBN	0.81388	0.927815	0.822275	0.93668	0.0118327		SARS_SF2_Di_-1.ct	Incar_DMS_invitro_Reactivities_top_87_percent_constrained.DBN	0.411873	0.425409	0.810588	0.965768	0.0131909		SARS_SF2_Di_-1.ct	Pyle_SHAPE_SARS2_Reactivity_top_87_percent_constrained.DBN	0.81692	0.939926	0.819599	0.940303	0.012932		SARS_SF2_Di_-1.ct	Sun_Reactivities_top_87_percent_constrained.DBN	0.80608	0.959416	0.80608	0.959416	0.0134819
SARS_SF2_Di_-1.ct	Rouskin_DMS_SARS2_Reactivity_top_88_percent_constrained.DBN	0.420581	0.430703	0.823199	0.971418	0.0140849		SARS_SF2_Di_-1.ct	Incarnato_SHAPE_SARS2_in_vitro_Reactivity_top_88_percent_constrained.DBN	0.815601	0.920356	0.834948	0.943047	0.0128464		SARS_SF2_Di_-1.ct	SHAPE_in_vivo_Incar_top_88_percent_constrained.DBN	0.8269	0.933349	0.835429	0.942267	0.0123947		SARS_SF2_Di_-1.ct	Incar_DMS_invitro_Reactivities_top_88_percent_constrained.DBN	0.418985	0.427013	0.824585	0.96941	0.0135689		SARS_SF2_Di_-1.ct	Pyle_SHAPE_SARS2_Reactivity_top_88_percent_constrained.DBN	0.829424	0.946343	0.832144	0.946722	0.0118762		SARS_SF2_Di_-1.ct	Sun_Reactivities_top_88_percent_constrained.DBN	0.821107	0.962384	0.821107	0.962384	0.014462
SARS_SF2_Di_-1.ct	Rouskin_DMS_SARS2_Reactivity_top_89_percent_constrained.DBN	0.427932	0.431986	0.837586	0.974313	0.0140173		SARS_SF2_Di_-1.ct	Incarnato_SHAPE_SARS2_in_vitro_Reactivity_top_89_percent_constrained.DBN	0.828162	0.926211	0.847807	0.949047	0.0122037		SARS_SF2_Di_-1.ct	SHAPE_in_vivo_Incar_top_89_percent_constrained.DBN	0.839633	0.939285	0.848293	0.948259	0.0121987		SARS_SF2_Di_-1.ct	Incar_DMS_invitro_Reactivities_top_89_percent_constrained.DBN	0.426154	0.428457	0.838695	0.972688	0.0137246		SARS_SF2_Di_-1.ct	Pyle_SHAPE_SARS2_Reactivity_top_89_percent_constrained.DBN	0.842386	0.952117	0.845149	0.952499	0.0123872		SARS_SF2_Di_-1.ct	Sun_Reactivities_top_89_percent_constrained.DBN	0.836077	0.965432	0.836077	0.965432	0.0144524
SARS_SF2_Di_-1.ct	Rouskin_DMS_SARS2_Reactivity_top_90_percent_constrained.DBN	0.435454	0.433029	0.85231	0.976664	0.0143805		SARS_SF2_Di_-1.ct	Incarnato_SHAPE_SARS2_in_vitro_Reactivity_top_90_percent_constrained.DBN	0.841468	0.931023	0.861429	0.953978	0.0129953		SARS_SF2_Di_-1.ct	SHAPE_in_vivo_Incar_top_90_percent_constrained.DBN	0.853456	0.943696	0.862259	0.952713	0.013305		SARS_SF2_Di_-1.ct	Incar_DMS_invitro_Reactivities_top_90_percent_constrained.DBN	0.433438	0.42982	0.853031	0.975783	0.0139885		SARS_SF2_Di_-1.ct	Pyle_SHAPE_SARS2_Reactivity_top_90_percent_constrained.DBN	0.855578	0.957652	0.858384	0.958036	0.0126797		SARS_SF2_Di_-1.ct	Sun_Reactivities_top_90_percent_constrained.DBN	0.850703	0.968961	0.850703	0.968961	0.0141718
SARS_SF2_Di_-1.ct	Rouskin_DMS_SARS2_Reactivity_top_91_percent_constrained.DBN	0.442805	0.434392	0.866697	0.97974	0.0140954		SARS_SF2_Di_-1.ct	Incarnato_SHAPE_SARS2_in_vitro_Reactivity_top_91_percent_constrained.DBN	0.854718	0.935916	0.874993	0.958991	0.0130073		SARS_SF2_Di_-1.ct	SHAPE_in_vivo_Incar_top_91_percent_constrained.DBN	0.86682	0.948749	0.875761	0.957814	0.0129322		SARS_SF2_Di_-1.ct	Incar_DMS_invitro_Reactivities_top_91_percent_constrained.DBN	0.441009	0.430703	0.867931	0.977786	0.0145691		SARS_SF2_Di_-1.ct	Pyle_SHAPE_SARS2_Reactivity_top_91_percent_constrained.DBN	0.868655	0.963266	0.871504	0.963652	0.0126432		SARS_SF2_Di_-1.ct	Sun_Reactivities_top_91_percent_constrained.DBN	0.865386	0.972409	0.865386	0.972409	0.014278
SARS_SF2_Di_-1.ct	Rouskin_DMS_SARS2_Reactivity_top_92_percent_constrained.DBN	0.450098	0.435756	0.880971	0.982815	0.0140292		SARS_SF2_Di_-1.ct	Incarnato_SHAPE_SARS2_in_vitro_Reactivity_top_92_percent_constrained.DBN	0.867106	0.942012	0.887675	0.965237	0.0122419		SARS_SF2_Di_-1.ct	SHAPE_in_vivo_Incar_top_92_percent_constrained.DBN	0.880126	0.953882	0.889204	0.962996	0.0129463		SARS_SF2_Di_-1.ct	Incar_DMS_invitro_Reactivities_top_92_percent_constrained.DBN	0.448408	0.431906	0.882492	0.980517	0.0142778		SARS_SF2_Di_-1.ct	Pyle_SHAPE_SARS2_Reactivity_top_92_percent_constrained.DBN	0.882535	0.967838	0.88543	0.968226	0.0134832		SARS_SF2_Di_-1.ct	Sun_Reactivities_top_92_percent_constrained.DBN	0.879954	0.976019	0.879954	0.976019	0.014219
SARS_SF2_Di_-1.ct	Rouskin_DMS_SARS2_Reactivity_top_93_percent_constrained.DBN	0.457391	0.437119	0.895246	0.98589	0.0140731		SARS_SF2_Di_-1.ct	Incarnato_SHAPE_SARS2_in_vitro_Reactivity_top_93_percent_constrained.DBN	0.880356	0.946904	0.901239	0.97025	0.01316		SARS_SF2_Di_-1.ct	SHAPE_in_vivo_Incar_top_93_percent_constrained.DBN	0.892458	0.960459	0.901663	0.969636	0.0120804		SARS_SF2_Di_-1.ct	Incar_DMS_invitro_Reactivities_top_93_percent_constrained.DBN	0.455979	0.432788	0.897392	0.98252	0.0146396		SARS_SF2_Di_-1.ct	Pyle_SHAPE_SARS2_Reactivity_top_93_percent_constrained.DBN	0.897161	0.971286	0.900104	0.971676	0.0142581		SARS_SF2_Di_-1.ct	Sun_Reactivities_top_93_percent_constrained.DBN	0.89458	0.979548	0.89458	0.979548	0.0143266
SARS_SF2_Di_-1.ct	Rouskin_DMS_SARS2_Reactivity_top_94_percent_constrained.DBN	0.465086	0.438001	0.910307	0.98788	0.0148787		SARS_SF2_Di_-1.ct	Incarnato_SHAPE_SARS2_in_vitro_Reactivity_top_94_percent_constrained.DBN	0.893662	0.951716	0.914861	0.975181	0.0132841		SARS_SF2_Di_-1.ct	SHAPE_in_vivo_Incar_top_94_percent_constrained.DBN	0.905592	0.965833	0.914933	0.975061	0.012939		SARS_SF2_Di_-1.ct	Incar_DMS_invitro_Reactivities_top_94_percent_constrained.DBN	0.463378	0.433991	0.911954	0.985251	0.0143467		SARS_SF2_Di_-1.ct	Pyle_SHAPE_SARS2_Reactivity_top_94_percent_constrained.DBN	0.910984	0.975938	0.913972	0.97633	0.0135399		SARS_SF2_Di_-1.ct	Sun_Reactivities_top_94_percent_constrained.DBN	0.90932	0.982916	0.90932	0.982916	0.0144886
SARS_SF2_Di_-1.ct	Rouskin_DMS_SARS2_Reactivity_top_95_percent_constrained.DBN	0.472781	0.438803	0.925368	0.989689	0.014906		SARS_SF2_Di_-1.ct	Incarnato_SHAPE_SARS2_in_vitro_Reactivity_top_95_percent_constrained.DBN	0.907313	0.956047	0.928836	0.979619	0.0136897		SARS_SF2_Di_-1.ct	SHAPE_in_vivo_Incar_top_95_percent_constrained.DBN	0.919128	0.970645	0.928609	0.979919	0.013401		SARS_SF2_Di_-1.ct	Incar_DMS_invitro_Reactivities_top_95_percent_constrained.DBN	0.47072	0.435194	0.926403	0.987983	0.0142749		SARS_SF2_Di_-1.ct	Pyle_SHAPE_SARS2_Reactivity_top_95_percent_constrained.DBN	0.924806	0.98051	0.92784	0.980903	0.0136033		SARS_SF2_Di_-1.ct	Sun_Reactivities_top_95_percent_constrained.DBN	0.924634	0.985483	0.924634	0.985483	0.0150917
SARS_SF2_Di_-1.ct	Rouskin_DMS_SARS2_Reactivity_top_96_percent_constrained.DBN	0.480361	0.439766	0.940205	0.99186	0.0147157		SARS_SF2_Di_-1.ct	Incarnato_SHAPE_SARS2_in_vitro_Reactivity_top_96_percent_constrained.DBN	0.920964	0.960379	0.94281	0.984057	0.0137517		SARS_SF2_Di_-1.ct	SHAPE_in_vivo_Incar_top_96_percent_constrained.DBN	0.933008	0.974976	0.942632	0.984291	0.013803		SARS_SF2_Di_-1.ct	Incar_DMS_invitro_Reactivities_top_96_percent_constrained.DBN	0.478463	0.435916	0.941641	0.989621	0.0150806		SARS_SF2_Di_-1.ct	Pyle_SHAPE_SARS2_Reactivity_top_96_percent_constrained.DBN	0.938687	0.985002	0.941765	0.985397	0.0137223		SARS_SF2_Di_-1.ct	Sun_Reactivities_top_96_percent_constrained.DBN	0.939719	0.98837	0.939719	0.98837	0.0149092
SARS_SF2_Di_-1.ct	Rouskin_DMS_SARS2_Reactivity_top_97_percent_constrained.DBN	0.487998	0.440648	0.955153	0.993849	0.0148569		SARS_SF2_Di_-1.ct	Incarnato_SHAPE_SARS2_in_vitro_Reactivity_top_97_percent_constrained.DBN	0.935589	0.963346	0.957783	0.987097	0.0147795		SARS_SF2_Di_-1.ct	SHAPE_in_vivo_Incar_top_97_percent_constrained.DBN	0.946544	0.979788	0.956308	0.98915	0.0135272		SARS_SF2_Di_-1.ct	Incar_DMS_invitro_Reactivities_top_97_percent_constrained.DBN	0.485804	0.437119	0.95609	0.992353	0.0143381		SARS_SF2_Di_-1.ct	Pyle_SHAPE_SARS2_Reactivity_top_97_percent_constrained.DBN	0.952911	0.989092	0.956036	0.989489	0.0141209		SARS_SF2_Di_-1.ct	Sun_Reactivities_top_97_percent_constrained.DBN	0.954976	0.991017	0.954976	0.991017	0.0151196
SARS_SF2_Di_-1.ct	Rouskin_DMS_SARS2_Reactivity_top_98_percent_constrained.DBN	0.495349	0.441931	0.96954	0.996744	0.01434		SARS_SF2_Di_-1.ct	Incarnato_SHAPE_SARS2_in_vitro_Reactivity_top_98_percent_constrained.DBN	0.948781	0.968319	0.971288	0.992193	0.0133993		SARS_SF2_Di_-1.ct	SHAPE_in_vivo_Incar_top_98_percent_constrained.DBN	0.960482	0.984039	0.970389	0.993441	0.0139889		SARS_SF2_Di_-1.ct	Incar_DMS_invitro_Reactivities_top_98_percent_constrained.DBN	0.49349	0.437921	0.971216	0.994173	0.0150377		SARS_SF2_Di_-1.ct	Pyle_SHAPE_SARS2_Reactivity_top_98_percent_constrained.DBN	0.967594	0.992461	0.970768	0.992859	0.0146261		SARS_SF2_Di_-1.ct	Sun_Reactivities_top_98_percent_constrained.DBN	0.970118	0.993824	0.970118	0.993824	0.0150484
SARS_SF2_Di_-1.ct	Rouskin_DMS_SARS2_Reactivity_top_99_percent_constrained.DBN	0.503388	0.442332	0.985276	0.997648	0.0156986		SARS_SF2_Di_-1.ct	Incarnato_SHAPE_SARS2_in_vitro_Reactivity_top_99_percent_constrained.DBN	0.96226	0.972891	0.985086	0.996877	0.0137553		SARS_SF2_Di_-1.ct	SHAPE_in_vivo_Incar_top_99_percent_constrained.DBN	0.975108	0.987328	0.985165	0.996761	0.0147288		SARS_SF2_Di_-1.ct	Incar_DMS_invitro_Reactivities_top_99_percent_constrained.DBN	0.500889	0.439044	0.985777	0.996723	0.0145137		SARS_SF2_Di_-1.ct	Pyle_SHAPE_SARS2_Reactivity_top_99_percent_constrained.DBN	0.981818	0.996551	0.985039	0.996951	0.0142274		SARS_SF2_Di_-1.ct	Sun_Reactivities_top_99_percent_constrained.DBN	0.985145	0.996792	0.985145	0.996792	0.014979
SARS_SF2_Di_-1.ct	Rouskin_DMS_SARS2_Reactivity_top_100_percent_constrained.DBN	0.510911	0.443375	1	1	0.0147241		SARS_SF2_Di_-1.ct	Incarnato_SHAPE_SARS2_in_vitro_Reactivity_top_100_percent_constrained.DBN	0.976828	0.975938	1	1	0.014914		SARS_SF2_Di_-1.ct	SHAPE_in_vivo_Incar_top_100_percent_constrained.DBN	0.989791	0.990536	1	1	0.0148346		SARS_SF2_Di_-1.ct	Incar_DMS_invitro_Reactivities_top_100_percent_constrained.DBN	0.508116	0.440488	1	1	0.0142228		SARS_SF2_Di_-1.ct	Pyle_SHAPE_SARS2_Reactivity_top_100_percent_constrained.DBN	0.996731	0.999599	1	1	0.0149614		SARS_SF2_Di_-1.ct	Sun_Reactivities_top_100_percent_constrained.DBN	1	1	1	1	0.0148552
					Sum	0.772721							Sum	0.686508							Sum	0.673963							Sum	0.736259							Sum	0.629313							Sum	0.74229

## Sheet: Main ROC Curve
SF1 Mono 100 Rouskins			SF1 Mono 100 Incarnato SHAPE in vitro			SF1 Mono 100 Incarnato SHAPE in vivo			SF1 Mono 100 Incarnato DMS in vitro			SF1 Mono 100 Pyle SHAPE			SF1 Mono 100 Sun SHAPE
fpr norm	tpf norm	AUC	fpr norm	tpf norm	AUC	fpr norm	tpf norm	AUC	fpr norm	tpf norm	AUC	fpr norm	tpf norm	AUC	fpr norm	tpf norm	AUC
0	0		0	0	0	0	0		0	0		0	0		0	0
0.00702498	0.0148433	0.000104274	0.00738115	0.0137317	0.000101356	0.00499311	0.0171551	8.56571e-05	0.0100784	0.00996126	0.000100393	0.00877443	0.0117168	0.000102809	0.00670188	0.0147202	9.86532e-05
0.0101472	0.0361004	0.000112713	0.0111589	0.0326233	0.000123243	0.0122245	0.0311089	0.000224961	0.0198208	0.0202915	0.000197688	0.0165803	0.0248983	0.000194352	0.00993923	0.0344014	0.000111369
0.0150535	0.0546088	0.000267929	0.0162153	0.0496839	0.000251221	0.0198003	0.0445703	0.000337654	0.0300112	0.0300683	0.000306407	0.0239872	0.0385679	0.000285672	0.012779	0.0546519	0.000155199
0.0182872	0.0756826	0.000244736	0.0224922	0.0649969	0.000407978	0.0271465	0.05836	0.000428724	0.0382979	0.0427965	0.000354641	0.0324198	0.0508544	0.000428833	0.0160164	0.0743331	0.000240642
0.0218555	0.0962067	0.000343289	0.0285947	0.0805595	0.000491616	0.0349518	0.0714931	0.000558027	0.0452408	0.0579229	0.000402152	0.0398268	0.064524	0.000477928	0.0210712	0.0914118	0.000462069
0.0260928	0.115815	0.00049074	0.0353365	0.0952067	0.000641868	0.0414945	0.0864319	0.000565498	0.050056	0.0763697	0.000367738	0.0478605	0.0772986	0.000620996	0.0278866	0.105969	0.000722232
0.0291035	0.137255	0.000413234	0.042892	0.108689	0.000821199	0.044938	0.105803	0.000364336	0.0557671	0.0935252	0.00053413	0.0558943	0.0901546	0.000724278	0.0340206	0.121503	0.00074529
0.0334523	0.156496	0.00068057	0.0473091	0.126665	0.000559487	0.0522268	0.119757	0.000872885	0.0595745	0.113632	0.000432642	0.0648396	0.101627	0.000909093	0.040836	0.136061	0.000927316
0.0385816	0.174455	0.00089484	0.0514355	0.145057	0.000598573	0.0584826	0.135106	0.00084519	0.0641657	0.132632	0.00060895	0.073614	0.113426	0.000995244	0.045834	0.153221	0.000765798
0.043934	0.192047	0.0010279	0.0558526	0.163033	0.000720128	0.0655418	0.149306	0.00105399	0.0683091	0.152186	0.000630558	0.0814199	0.126526	0.000987637	0.0517976	0.168998	0.00100783
0.0490633	0.210189	0.00107813	0.0612577	0.179594	0.000970725	0.0724862	0.163671	0.0011366	0.0730123	0.171002	0.000804263	0.0887129	0.140439	0.00102423	0.0608281	0.180384	0.00162896
0.0537467	0.22888	0.00107192	0.0674765	0.194991	0.0012126	0.0798324	0.17746	0.00130366	0.0784994	0.188342	0.00103345	0.0974303	0.152238	0.00132712	0.066962	0.195917	0.00120174
0.0592105	0.246289	0.00134569	0.0730559	0.211302	0.00117895	0.0863177	0.192481	0.0012483	0.0836506	0.206419	0.0010633	0.105863	0.164443	0.00138667	0.0757085	0.20771	0.00181674
0.0651204	0.263148	0.00155518	0.0786935	0.227531	0.00128272	0.0922865	0.208241	0.00124294	0.0880179	0.225604	0.000985281	0.113726	0.177543	0.00139598	0.0806497	0.224951	0.00111153
0.0703613	0.280924	0.00147228	0.0850285	0.24276	0.00153789	0.098657	0.223426	0.00142334	0.0923852	0.244973	0.00106987	0.121816	0.190236	0.00153914	0.0857613	0.241949	0.00123675
0.0757136	0.298516	0.00159776	0.0908404	0.258739	0.00150377	0.105429	0.238037	0.00161205	0.0984323	0.261391	0.00158064	0.130591	0.202034	0.00177273	0.0907026	0.25919	0.00128071
0.08062	0.316841	0.00155453	0.0967686	0.274552	0.00162759	0.112316	0.252483	0.00173886	0.103471	0.279653	0.00140923	0.138568	0.21489	0.00171413	0.0938831	0.279034	0.000887482
0.0877565	0.331501	0.00236575	0.104266	0.288117	0.00216012	0.119548	0.266437	0.00192671	0.10963	0.295886	0.00182237	0.145576	0.229129	0.00160577	0.0981428	0.297251	0.00126619
0.0938894	0.347993	0.00213421	0.111531	0.302015	0.00219411	0.12655	0.280719	0.00196555	0.115342	0.313042	0.00178781	0.154236	0.24109	0.00208796	0.103595	0.313761	0.00171074
0.0993533	0.365402	0.00199651	0.118854	0.31583	0.00231283	0.133838	0.294591	0.00214721	0.121389	0.32946	0.00199225	0.162555	0.253458	0.00210842	0.109729	0.329294	0.00201986
0.104929	0.382628	0.0021333	0.126874	0.328646	0.00263589	0.140496	0.309366	0.0020596	0.1271	0.346615	0.00197955	0.171044	0.265663	0.00225536	0.114159	0.347267	0.00153841
0.110839	0.399487	0.00236093	0.134255	0.342378	0.00252714	0.147498	0.32373	0.0022667	0.132923	0.363402	0.00211611	0.179477	0.277868	0.00234314	0.119895	0.36337	0.00208442
0.117306	0.415246	0.00268558	0.141695	0.356027	0.00264858	0.154442	0.338094	0.00234788	0.137626	0.382217	0.00179766	0.187055	0.291294	0.0022074	0.125745	0.37931	0.00221895
0.123773	0.431006	0.00278751	0.149831	0.368676	0.00299981	0.161961	0.351638	0.00264374	0.144009	0.398082	0.00254095	0.196114	0.302685	0.00274212	0.131311	0.395657	0.00220221
0.12946	0.448048	0.002548	0.157619	0.381826	0.00297365	0.169651	0.364935	0.00280655	0.15028	0.414315	0.00259817	0.204547	0.31489	0.00265533	0.136764	0.412167	0.00224729
0.134813	0.46564	0.00249228	0.165524	0.394808	0.00312065	0.177112	0.37856	0.00282443	0.155879	0.43147	0.00241585	0.212524	0.327828	0.002615	0.143295	0.427131	0.0027898
0.140834	0.482316	0.00290422	0.173718	0.407375	0.00333836	0.183483	0.393745	0.00250836	0.161814	0.448257	0.00266043	0.220443	0.340765	0.00269878	0.150054	0.44177	0.00298578
0.147859	0.49716	0.00349254	0.182378	0.419276	0.00363083	0.190886	0.407453	0.00301661	0.169541	0.461907	0.00356905	0.228477	0.353539	0.00284024	0.156245	0.457222	0.00283053
0.154773	0.512186	0.00354098	0.190864	0.431426	0.00366083	0.199667	0.419191	0.00368091	0.177828	0.47482	0.00393468	0.237593	0.364849	0.00332607	0.163287	0.471454	0.00332029
0.161351	0.527946	0.00347333	0.200395	0.442079	0.0042137	0.207989	0.431585	0.00359159	0.185218	0.489024	0.00361429	0.245969	0.377136	0.00315874	0.169932	0.486256	0.00323121
0.168934	0.541873	0.00410876	0.208532	0.454729	0.00369999	0.216253	0.444061	0.00366993	0.192273	0.503966	0.00355542	0.254857	0.388771	0.00345555	0.176237	0.501545	0.0031619
0.175847	0.556899	0.00385011	0.216843	0.467129	0.00388233	0.224805	0.456127	0.00390054	0.200784	0.516325	0.00439426	0.263347	0.400895	0.00340342	0.183109	0.516021	0.00354624
0.183653	0.57046	0.00445274	0.225677	0.47878	0.0042296	0.234504	0.466552	0.00452521	0.207167	0.532374	0.00339813	0.271324	0.413832	0.00330104	0.191401	0.528465	0.00438211
0.191012	0.584754	0.00430349	0.233988	0.49118	0.00408222	0.242941	0.478782	0.00403931	0.21467	0.546394	0.00409948	0.280497	0.42498	0.00389845	0.199864	0.540664	0.00457539
0.199822	0.596848	0.00525769	0.243462	0.501916	0.00475487	0.251894	0.490273	0.0043895	0.222396	0.560229	0.00432876	0.289499	0.436371	0.00392836	0.206906	0.554896	0.00390794
0.208408	0.609126	0.00523001	0.251656	0.514482	0.00421609	0.260331	0.502586	0.00424013	0.230795	0.572773	0.00481052	0.297647	0.449064	0.00365883	0.215142	0.56742	0.00467291
0.216436	0.62232	0.00499632	0.259328	0.527798	0.00404913	0.268825	0.514734	0.00437216	0.238298	0.586977	0.00440397	0.30682	0.460212	0.00422164	0.222866	0.580677	0.00448526
0.225022	0.634781	0.00545028	0.268685	0.5387	0.00504073	0.278122	0.525733	0.00488801	0.246473	0.599889	0.00490391	0.316278	0.471033	0.0044551	0.231272	0.592957	0.00498425
0.2345	0.645593	0.00611902	0.277171	0.550851	0.0046742	0.286903	0.53747	0.00471952	0.255319	0.61188	0.00541305	0.326078	0.481286	0.0047166	0.239109	0.606051	0.0047501
0.244425	0.655672	0.006507	0.285947	0.562585	0.00493725	0.295742	0.549126	0.00485338	0.264166	0.623686	0.00551749	0.334682	0.493247	0.00424365	0.247856	0.617843	0.00540398
0.253903	0.666483	0.00631703	0.295536	0.573154	0.00549637	0.305269	0.559796	0.00533323	0.273572	0.634754	0.00597081	0.343798	0.504557	0.00459968	0.256716	0.629473	0.0055772
0.263715	0.676745	0.00664068	0.305765	0.582808	0.00596154	0.315197	0.569892	0.00565837	0.282643	0.646191	0.0058613	0.352573	0.516273	0.00453	0.265349	0.641428	0.0055374
0.272748	0.688474	0.00621837	0.315878	0.592629	0.00599311	0.323519	0.582287	0.00484571	0.291713	0.657812	0.00596672	0.361005	0.52856	0.00445712	0.275345	0.651431	0.00651172
0.282337	0.699102	0.00670415	0.326223	0.602116	0.00622903	0.332989	0.593039	0.0056159	0.300448	0.669803	0.00585046	0.370577	0.539138	0.00516068	0.284603	0.662492	0.00613314
0.291592	0.71028	0.00657374	0.335348	0.613351	0.00559666	0.343434	0.602397	0.00629225	0.309854	0.680871	0.00640461	0.379124	0.55118	0.00471067	0.29494	0.672007	0.0069464
0.302186	0.719443	0.00762122	0.345403	0.623254	0.00626659	0.352732	0.613396	0.00570306	0.319597	0.691201	0.00673398	0.388582	0.562002	0.0053155	0.304538	0.68258	0.00655171
0.311552	0.730438	0.00684175	0.355225	0.633491	0.00622225	0.362259	0.624066	0.00594554	0.330235	0.70024	0.00744936	0.398097	0.572661	0.00544894	0.314364	0.692827	0.00680747
0.321588	0.740334	0.00742975	0.365628	0.642895	0.00668826	0.372475	0.633752	0.00647428	0.339418	0.711492	0.0065333	0.407156	0.584052	0.00529111	0.32436	0.70283	0.00702551			Rouskins DMS in vivo	Incarnato SHAPE in vitro	Incarnato SHAPE in vivo	Incarnato DMS in vitro	Pyle SHAPE in vivo	Sun SHAPE in vivo
0.331066	0.751145	0.00711946	0.376787	0.651217	0.00726687	0.382174	0.644176	0.00624804	0.348824	0.72256	0.00679676	0.41633	0.595199	0.00545992	0.334242	0.712996	0.00704614		SF1 Mono AUC	0.775837	0.687244	0.67752	0.738012	0.631306	0.745183
0.341548	0.760308	0.00796933	0.387597	0.660039	0.00713514	0.391644	0.655011	0.00620276	0.35991	0.730861	0.0081025	0.426528	0.604882	0.0061691	0.344295	0.722999	0.00726818		SF1 Di AUC	0.758742	0.676619	0.660084	0.721903	0.621654	0.72513
0.351695	0.770203	0.0078154	0.397768	0.669693	0.00681136	0.40163	0.665025	0.00664109	0.369765	0.741007	0.0073022	0.434961	0.617168	0.00520431	0.354404	0.73284	0.00740873		SF2 Mono AUC	0.779701	0.690672	0.676756	0.741474	0.632653	0.74802
0.361619	0.780282	0.00774366	0.407823	0.679596	0.00683309	0.411616	0.675039	0.00674109	0.380291	0.750231	0.00789716	0.443735	0.628885	0.00551811	0.364968	0.74203	0.00783879		SF2 Di AUC	0.772721	0.686508	0.673963	0.736259	0.629313	0.74229
0.371766	0.789995	0.00801622	0.418459	0.688668	0.00732455	0.422808	0.683329	0.00764745	0.390705	0.759454	0.00790921	0.453308	0.639544	0.00612179	0.375987	0.750569	0.00827003
0.382471	0.798974	0.0085528	0.429734	0.696823	0.00785678	0.432909	0.693179	0.00700181	0.401456	0.768308	0.00825953	0.463449	0.649308	0.0065852	0.387005	0.759109	0.00836412		SARS Paper	0.783	0.689	0.675	0.743	0.629	0.756
0.39351	0.80722	0.0089111	0.4413	0.704563	0.00814879	0.442723	0.703439	0.00690359	0.411646	0.777901	0.0079271	0.473135	0.659805	0.00639091	0.39808	0.767567	0.00850091
0.403992	0.816383	0.00855709	0.452052	0.713468	0.00767125	0.453168	0.712797	0.00744542	0.421501	0.788231	0.00776756	0.483049	0.669894	0.00664131	0.408701	0.776675	0.00824889
0.416927	0.821514	0.0106262	0.462746	0.722456	0.0077259	0.46413	0.721415	0.00790807	0.432811	0.795979	0.00900267	0.492849	0.680146	0.00666544	0.419379	0.785703	0.0083894
0.428412	0.829027	0.00952161	0.474544	0.729863	0.00861107	0.475264	0.729787	0.0081255	0.443561	0.804833	0.00865218	0.502194	0.691131	0.00645806	0.431135	0.793185	0.00932523
0.44012	0.836357	0.00979232	0.485993	0.737769	0.00844708	0.485767	0.739063	0.00776219	0.455095	0.812212	0.00936818	0.510854	0.703011	0.00608841	0.442154	0.801724	0.00883367
0.451383	0.844237	0.00950802	0.497268	0.745925	0.0084104	0.497303	0.74686	0.00861564	0.466069	0.820697	0.00900653	0.519742	0.714646	0.00635205	0.454024	0.809044	0.00960357
0.46376	0.850284	0.0105243	0.507614	0.755412	0.00781491	0.508092	0.755725	0.00815406	0.47738	0.828445	0.00936987	0.529827	0.724491	0.00730642	0.465042	0.817583	0.00900841
0.474799	0.858714	0.00947955	0.519063	0.763318	0.00873961	0.519054	0.764344	0.00837865	0.488242	0.837115	0.00909296	0.539627	0.734744	0.0072005	0.477197	0.824496	0.0100211
0.486619	0.865677	0.0102321	0.530396	0.771391	0.00874237	0.530934	0.771649	0.00916732	0.49944	0.845047	0.00946301	0.54937	0.745159	0.00726011	0.489294	0.83149	0.0100589
0.499554	0.870808	0.0112638	0.54173	0.779463	0.00883386	0.541724	0.780514	0.00842152	0.511086	0.852426	0.00992747	0.560139	0.754028	0.00811984	0.501562	0.83824	0.0102834
0.512154	0.876489	0.0110441	0.553295	0.787203	0.00910458	0.552629	0.789297	0.00860688	0.523516	0.858329	0.010669	0.569825	0.764524	0.00740522	0.514057	0.844665	0.0105541
0.525089	0.88162	0.0114036	0.564687	0.795193	0.00905834	0.563648	0.797833	0.00879155	0.536282	0.863863	0.011028	0.57991	0.774369	0.00780943	0.526268	0.851496	0.0103977
0.537578	0.887667	0.0110859	0.575497	0.804014	0.00869154	0.574839	0.806123	0.0090217	0.547928	0.871057	0.0101444	0.590622	0.78332	0.00839064	0.538649	0.858084	0.0106243
0.55029	0.893165	0.0113538	0.586714	0.812253	0.00911106	0.587236	0.81269	0.0100747	0.560246	0.877329	0.010807	0.601219	0.792514	0.00839882	0.551883	0.863452	0.0114264
0.562333	0.899762	0.0108357	0.599384	0.818412	0.0103693	0.598542	0.820816	0.00928034	0.5729	0.882863	0.0111717	0.611874	0.801546	0.0085402	0.56398	0.870446	0.0105302
0.575379	0.904893	0.0118056	0.61095	0.826151	0.00955505	0.610308	0.828285	0.00974509	0.585106	0.889319	0.0108551	0.622301	0.810985	0.00845594	0.576646	0.876627	0.0111028
0.588202	0.910207	0.0116719	0.623213	0.832892	0.0102139	0.621671	0.836329	0.00950374	0.597984	0.894484	0.0115191	0.632215	0.821074	0.0081401	0.589822	0.882075	0.0116227
0.601583	0.914605	0.0122382	0.635592	0.839467	0.0103921	0.633322	0.843963	0.00983267	0.611198	0.899281	0.011883	0.642983	0.830024	0.00893822	0.602544	0.888175	0.0112996
0.614407	0.919919	0.0117965	0.647855	0.846208	0.0103772	0.644858	0.851761	0.00982575	0.623292	0.905737	0.010954	0.65398	0.838568	0.00922133	0.615664	0.893705	0.0117252
0.627788	0.924317	0.0123682	0.660584	0.852283	0.010848	0.657197	0.858409	0.0105922	0.636506	0.910533	0.0120317	0.665318	0.846623	0.00959934	0.628841	0.899154	0.0118478
0.641838	0.927799	0.0130355	0.672265	0.859857	0.0100448	0.669766	0.86473	0.0108687	0.65028	0.914222	0.0125923	0.676771	0.854597	0.00978714	0.642415	0.904034	0.0122715
0.654884	0.932747	0.012169	0.683424	0.868179	0.00968792	0.682105	0.871378	0.0107522	0.662934	0.919941	0.0116409	0.687311	0.863792	0.00910498	0.656273	0.908507	0.0125902
0.668376	0.936962	0.0126419	0.695281	0.875502	0.0103802	0.69433	0.878191	0.0107355	0.675924	0.924922	0.0120147	0.698593	0.87201	0.0098375	0.670074	0.913061	0.0126015
0.682203	0.94081	0.0130085	0.70766	0.882077	0.0109196	0.706554	0.885004	0.0108187	0.689586	0.92898	0.0126916	0.709589	0.880553	0.00968303	0.683819	0.917697	0.0126133
0.695919	0.944658	0.0129564	0.719807	0.888984	0.0107984	0.718721	0.891981	0.0108528	0.702016	0.934883	0.0116206	0.720814	0.888771	0.00997595	0.697223	0.92282	0.0123693
0.709634	0.948507	0.0130092	0.732245	0.895476	0.0111375	0.731233	0.898383	0.0112401	0.714222	0.941339	0.01149	0.731753	0.897478	0.009818	0.710229	0.928513	0.0120764
0.723907	0.951439	0.0135799	0.744973	0.901551	0.011475	0.744203	0.904129	0.0117271	0.72654	0.947427	0.0116704	0.743946	0.904312	0.0110263	0.724201	0.932824	0.0130331
0.737957	0.954737	0.013414	0.757585	0.907793	0.011449	0.756543	0.910777	0.0112384	0.741545	0.949271	0.0142444	0.756139	0.911229	0.0111106	0.737945	0.937459	0.0128849
0.751784	0.958585	0.0132543	0.770603	0.913452	0.011892	0.7698	0.916113	0.0121454	0.755655	0.952407	0.0134382	0.768503	0.917819	0.0113479	0.751349	0.942583	0.0126342
0.766169	0.961334	0.0138283	0.783622	0.919111	0.0119656	0.782599	0.922105	0.0118015	0.769317	0.956466	0.0130671	0.780753	0.924573	0.011326	0.765037	0.947381	0.0129675
0.781111	0.963167	0.0143917	0.795827	0.925935	0.0113011	0.795914	0.927358	0.0123477	0.783315	0.959786	0.0134349	0.793459	0.930757	0.011826	0.779008	0.951692	0.0132968
0.795718	0.965732	0.0141069	0.808497	0.932094	0.0118096	0.809056	0.932857	0.0122603	0.797648	0.962738	0.0137996	0.806393	0.936534	0.0121129	0.792639	0.95649	0.0130379
0.809768	0.969031	0.0136148	0.82169	0.937503	0.0123685	0.821625	0.939178	0.0118044	0.811422	0.966427	0.0133114	0.819896	0.941579	0.0127146	0.806781	0.960556	0.0135843
0.824153	0.971779	0.0139785	0.835174	0.942497	0.0127083	0.834711	0.944759	0.0123626	0.825532	0.969747	0.0136829	0.832545	0.947762	0.0119881	0.821662	0.963565	0.0143383
0.838314	0.974895	0.0138059	0.847844	0.948655	0.0120195	0.847567	0.950669	0.0122216	0.839866	0.972514	0.0139397	0.845707	0.953214	0.0125459	0.836599	0.966493	0.0144367
0.853256	0.976727	0.0145943	0.861502	0.953399	0.0130215	0.86157	0.954937	0.0133726	0.853975	0.975835	0.0137688	0.858982	0.958584	0.0127258	0.851252	0.969828	0.0142111
0.867417	0.980026	0.0138786	0.875102	0.958226	0.0130318	0.874828	0.960273	0.0127309	0.868533	0.978233	0.0142408	0.872201	0.963954	0.0127421	0.865906	0.973162	0.01426
0.881467	0.983324	0.0138157	0.888004	0.964051	0.0124386	0.888085	0.965608	0.0128016	0.882979	0.981	0.0141712	0.886103	0.96843	0.0134634	0.880502	0.976578	0.0142546
0.895852	0.986073	0.0141841	0.90143	0.969128	0.0130111	0.901056	0.971436	0.0126001	0.898096	0.982476	0.0148527	0.900689	0.971847	0.0141754	0.895155	0.979912	0.0143589
0.910682	0.988272	0.0146566	0.915088	0.973872	0.0133012	0.914428	0.976607	0.0130595	0.912654	0.985058	0.0143402	0.914649	0.976241	0.0136277	0.909922	0.983084	0.0145171
0.925624	0.990104	0.0147942	0.928978	0.978282	0.0135888	0.92826	0.981121	0.0135704	0.926876	0.98801	0.0140512	0.928323	0.98096	0.0134141	0.925087	0.985686	0.0149474
0.940455	0.99212	0.0147136	0.943043	0.982443	0.0138179	0.942206	0.985472	0.0137437	0.941881	0.989854	0.0148534	0.942055	0.985598	0.0135337	0.939967	0.988696	0.0147122
0.955397	0.993953	0.0148517	0.957747	0.985689	0.0144937	0.955808	0.990314	0.0134702	0.956215	0.992621	0.0142279	0.956242	0.989666	0.0140406	0.954904	0.991623	0.0148121
0.96967	0.996885	0.0142285	0.971522	0.990266	0.0136402	0.970213	0.994008	0.0143191	0.971333	0.994281	0.0150311	0.970942	0.992921	0.014596	0.970069	0.994226	0.0150769
0.985281	0.997801	0.0155767	0.985238	0.994927	0.0136466	0.985135	0.996963	0.0148766	0.985778	0.996864	0.0144004	0.985186	0.996908	0.0142002	0.984949	0.997235	0.0148393
1	1	0.014719	1	0.998089	0.0147341	1	1	0.0148646	1	1	0.0142217	1	1	0.014814	1	1	0.0150508
	Sum	0.775837		Sum	0.687244		Sum	0.67752		Sum	0.738012		Sum	0.631306		Sum	0.745183
SF1 Di 100 Rouskins			SF1 Di 100 Incarnato SHAPE in vitro			SF1 Di 100 Incarnato SHAPE in vivo			SF1 Di 100 Incarnato DMS in vitro			SF1 Di 100 Pyle SHAPE			SF1 Di 100 Sun SHAPE
fpr norm	tpf norm	AUC	fpr norm	tpf norm	AUC	fpr norm	tpf norm	AUC	fpr norm	tpf norm	AUC	fpr norm	tpf norm	AUC	fpr norm	tpf norm	AUC
0	0		0	0		0	0		0	0		0	0		0	0
0.00736648	0.0154805	0.000114037	0.00663927	0.0162411	0.000107829	0.00457952	0.0200173	9.16697e-05	0.0102722	0.00953206	9.79154e-05	0.00877872	0.0122184	0.000107262	0.00643567	0.0166031	0.000106852
0.0116636	0.0374113	0.000160761	0.0100116	0.0385481	0.000129997	0.0120212	0.0347416	0.000258537	0.0196199	0.0207972	0.000194407	0.0175574	0.0245323	0.000215362	0.00916439	0.0400763	0.000109357
0.0168815	0.057622	0.000300667	0.0151755	0.0575286	0.000297071	0.020868	0.0468675	0.000414627	0.0300976	0.029896	0.00031324	0.0261813	0.037037	0.0003194	0.0117387	0.0638359	0.000164331
0.0216902	0.0784777	0.000377374	0.0224997	0.0724978	0.000530993	0.029975	0.0585122	0.00053287	0.0380072	0.0441941	0.000349558	0.0350116	0.0492554	0.000434943	0.0147763	0.0867366	0.000263474
0.0263966	0.0995485	0.000468511	0.0305617	0.0860973	0.000694113	0.0375208	0.073044	0.000551175	0.045095	0.0604419	0.000428402	0.0426026	0.0636693	0.000483315	0.0201308	0.105344	0.000564059
0.0322284	0.118469	0.000690888	0.0385183	0.0998924	0.000794802	0.0450146	0.087672	0.000656993	0.0507447	0.0795061	0.000449187	0.0509166	0.0767468	0.000638071	0.0285229	0.118321	0.00099296
0.0369347	0.13954	0.000656725	0.0470545	0.112611	0.000961272	0.0504788	0.106053	0.000579496	0.0572162	0.0970537	0.000628083	0.0592306	0.0899198	0.000747591	0.035319	0.134256	0.000912411
0.0423573	0.159106	0.000862758	0.0533776	0.129439	0.00081846	0.0580246	0.120681	0.000910637	0.0621469	0.117634	0.000580015	0.0680093	0.102138	0.000896643	0.0439685	0.146756	0.00126937
0.0481891	0.177811	0.00103696	0.0602276	0.145289	0.000995236	0.065154	0.135983	0.000969488	0.0669748	0.138648	0.000669385	0.0768397	0.114357	0.00100981	0.0513824	0.161546	0.00119768
0.0542255	0.196087	0.00118366	0.064285	0.166324	0.000674832	0.0724396	0.150996	0.0011001	0.0719055	0.159229	0.000785103	0.0848954	0.127911	0.00103043	0.0583844	0.177099	0.00124005
0.0603642	0.214363	0.00131591	0.0712931	0.18188	0.00127464	0.0801936	0.165143	0.00128051	0.0778634	0.17786	0.00105967	0.0926414	0.142134	0.00110096	0.0692478	0.185496	0.00201512
0.0660937	0.233283	0.00133659	0.0780377	0.197926	0.00133494	0.0879475	0.17929	0.0013902	0.084643	0.194541	0.00131892	0.101523	0.154162	0.00136927	0.0776914	0.198378	0.00167502
0.0722325	0.251344	0.00154293	0.084677	0.214167	0.00142191	0.0949729	0.194784	0.00136843	0.09132	0.211655	0.00141321	0.109837	0.167239	0.00139042	0.0863924	0.210782	0.00183402
0.0789851	0.268329	0.00181192	0.0910528	0.230897	0.00147216	0.102311	0.209701	0.00153871	0.0963534	0.232019	0.00116784	0.118255	0.180221	0.00151697	0.0919014	0.229103	0.00126211
0.085533	0.28553	0.00186965	0.0978501	0.246845	0.00167789	0.109596	0.224714	0.00163717	0.101284	0.252816	0.00124655	0.126878	0.192726	0.00166203	0.0984915	0.24542	0.00161735
0.0917741	0.303376	0.00189338	0.104121	0.263771	0.00165395	0.117454	0.238668	0.00187546	0.108783	0.267981	0.00200951	0.136019	0.204372	0.001868	0.108119	0.256107	0.00246574
0.097299	0.322726	0.00178302	0.110918	0.279718	0.00190134	0.125156	0.252911	0.0019479	0.114638	0.286828	0.00167943	0.144333	0.217449	0.00180787	0.111414	0.278626	0.00091809
0.104665	0.338207	0.00249139	0.118927	0.293416	0.00235005	0.132962	0.266962	0.0020839	0.122342	0.30156	0.00232326	0.152027	0.231672	0.00178256	0.115842	0.29895	0.00132367
0.111418	0.355192	0.00239848	0.126462	0.307993	0.00232074	0.14108	0.280435	0.00227664	0.12943	0.317808	0.00225257	0.161064	0.243509	0.00220057	0.122535	0.315076	0.00210884
0.117966	0.372393	0.00243842	0.134261	0.322082	0.00251176	0.149042	0.294197	0.00234243	0.137031	0.332756	0.00252942	0.170204	0.255059	0.00233129	0.129383	0.330916	0.00226596
0.124002	0.390669	0.00235824	0.142586	0.335192	0.00279062	0.157005	0.307959	0.002452	0.142886	0.351603	0.00205869	0.178879	0.267564	0.00232124	0.134943	0.349141	0.00194137
0.13096	0.407224	0.00283315	0.150121	0.34977	0.00263553	0.164394	0.322876	0.00238595	0.149563	0.368501	0.00246046	0.187452	0.280164	0.00240161	0.142769	0.363168	0.00284207
0.137917	0.423565	0.00294684	0.15792	0.363859	0.00283755	0.172408	0.336541	0.00269709	0.156138	0.385832	0.00253654	0.195507	0.293719	0.00236613	0.148999	0.380153	0.00236825
0.145386	0.43883	0.00327753	0.166877	0.375795	0.00336627	0.180318	0.350399	0.00277169	0.163739	0.40078	0.0030465	0.204596	0.30546	0.00277619	0.155434	0.396756	0.00255339
0.152548	0.454741	0.00325679	0.175308	0.38871	0.00327714	0.188333	0.364065	0.00291767	0.170724	0.417244	0.0029145	0.21322	0.317965	0.00274207	0.161664	0.41374	0.00257749
0.159198	0.471727	0.00313712	0.183528	0.402015	0.00330458	0.196555	0.377346	0.00310266	0.177093	0.434792	0.00276909	0.22205	0.330183	0.00291564	0.168872	0.428912	0.00309158
0.166257	0.488067	0.00344553	0.192117	0.414637	0.00356127	0.203684	0.392647	0.00279937	0.183975	0.451473	0.00310721	0.230571	0.342879	0.00292151	0.176492	0.443321	0.00337803
0.174135	0.502473	0.0039585	0.200811	0.427062	0.00371299	0.211386	0.406891	0.00313384	0.192604	0.464255	0.0040059	0.23873	0.356243	0.0029066	0.183339	0.45916	0.00314412
0.181911	0.517093	0.00402078	0.209558	0.439389	0.00384333	0.220545	0.418439	0.0038325	0.201438	0.47682	0.00421228	0.248128	0.367411	0.00345308	0.190856	0.47376	0.00356118
0.18938	0.532574	0.00397768	0.219359	0.44976	0.00440802	0.229132	0.431046	0.00370122	0.20904	0.491768	0.00373814	0.256494	0.380393	0.00318222	0.198116	0.488836	0.00354867
0.196951	0.547624	0.00414612	0.228001	0.462284	0.00399486	0.238083	0.44298	0.00396505	0.216949	0.506282	0.00400449	0.266047	0.391275	0.00373798	0.205015	0.50458	0.00348112
0.204011	0.56375	0.00397982	0.237327	0.473535	0.00441647	0.246878	0.455202	0.00400339	0.225886	0.518414	0.00463298	0.274981	0.403207	0.00360211	0.212377	0.519466	0.00382452
0.2124	0.57708	0.00484147	0.246022	0.48596	0.00422507	0.256765	0.465403	0.00460171	0.232974	0.534662	0.00378959	0.283398	0.416189	0.00350317	0.220718	0.532538	0.0044417
0.220278	0.591486	0.00465975	0.254821	0.49819	0.0043839	0.265872	0.477047	0.00434447	0.241192	0.54831	0.00450589	0.292848	0.427167	0.00403674	0.229779	0.544275	0.0049319
0.228975	0.604386	0.00525607	0.264464	0.508854	0.00490675	0.275187	0.488307	0.00454866	0.24982	0.561308	0.00484334	0.301782	0.439099	0.00392275	0.237553	0.558397	0.00434114
0.237569	0.617287	0.0053051	0.273264	0.521084	0.00458536	0.284138	0.500337	0.00447845	0.25886	0.573224	0.00518168	0.31056	0.451413	0.00396283	0.246409	0.570515	0.00505219
0.245959	0.630617	0.00529063	0.28122	0.534879	0.00425581	0.293141	0.512174	0.00461106	0.266975	0.587305	0.00476601	0.319546	0.463249	0.00416243	0.254544	0.583969	0.00475041
0.25486	0.643088	0.00572423	0.290916	0.545446	0.00528833	0.302248	0.523819	0.00477041	0.276117	0.599003	0.00547625	0.329254	0.473845	0.0046002	0.263451	0.595992	0.00530848
0.264477	0.653838	0.00628819	0.299874	0.557382	0.00499288	0.311563	0.535078	0.00498434	0.285054	0.611352	0.00546354	0.33891	0.484441	0.00467805	0.271482	0.609637	0.00489643
0.274913	0.662868	0.00691759	0.309306	0.568438	0.00536149	0.320462	0.547108	0.00486862	0.293785	0.623917	0.00544766	0.348051	0.495991	0.00453346	0.280492	0.621469	0.0055994
0.284326	0.674049	0.00634464	0.319212	0.578613	0.00573186	0.329933	0.558079	0.00528572	0.303544	0.634532	0.00619215	0.357294	0.507446	0.00469056	0.289657	0.633015	0.0058012
0.293636	0.685444	0.00638177	0.329381	0.588299	0.0059828	0.340289	0.567414	0.00587611	0.312275	0.647097	0.00565005	0.366176	0.519473	0.00461396	0.298924	0.64437	0.00597161
0.303356	0.696194	0.00676678	0.339498	0.598082	0.00605079	0.348928	0.579925	0.00500976	0.321828	0.658146	0.00628737	0.37542	0.530928	0.00490762	0.308809	0.65458	0.00647065
0.313076	0.70673	0.00686918	0.349668	0.607768	0.0061808	0.358139	0.591377	0.00544722	0.330457	0.670927	0.0057892	0.384921	0.54181	0.0051481	0.318179	0.665744	0.00623825
0.323	0.716835	0.00711408	0.358889	0.619215	0.00570991	0.368235	0.601193	0.0060695	0.340318	0.681326	0.00671878	0.393752	0.553933	0.00489143	0.328528	0.675095	0.00698626
0.333743	0.725435	0.0077932	0.368743	0.629488	0.00620267	0.377914	0.611779	0.00592168	0.349872	0.692158	0.00661229	0.403047	0.565292	0.00525446	0.338362	0.685401	0.00674003
0.342848	0.737261	0.00671334	0.378702	0.639566	0.00636937	0.38749	0.622558	0.00596121	0.360144	0.70169	0.00720791	0.412755	0.575792	0.00558993	0.348298	0.695515	0.00691111
0.353182	0.746506	0.00771405	0.389451	0.648175	0.00696742	0.397689	0.632182	0.00644815	0.368978	0.714038	0.00630789	0.421534	0.588106	0.00516282	0.358441	0.705248	0.00715306
0.363311	0.756181	0.0076593	0.400253	0.656687	0.00709352	0.407681	0.64219	0.00641656	0.378223	0.725737	0.00670943	0.430777	0.599465	0.00554115	0.368378	0.715363	0.00710832
0.374258	0.764137	0.00836532	0.410844	0.66559	0.00704941	0.417204	0.653161	0.00622026	0.38942	0.733319	0.00821076	0.440795	0.609393	0.00610494	0.378675	0.724905	0.00746439
0.384387	0.774027	0.00784005	0.420908	0.675374	0.00679716	0.427352	0.662881	0.00672678	0.399589	0.742851	0.00755442	0.449832	0.621229	0.005614	0.389126	0.734065	0.0076721
0.394209	0.784347	0.00770384	0.430973	0.685256	0.00689661	0.437188	0.673179	0.00662109	0.409759	0.7526	0.00765356	0.458766	0.633162	0.00565644	0.399423	0.743511	0.00765599
0.403929	0.794883	0.00772599	0.441564	0.694159	0.00735199	0.448064	0.681551	0.00741279	0.420134	0.761698	0.00790257	0.468887	0.642994	0.00650796	0.410441	0.751622	0.00828127
0.414774	0.803268	0.00871152	0.45284	0.70179	0.00791354	0.457952	0.691752	0.00683977	0.430508	0.771014	0.00799922	0.479215	0.652348	0.00673739	0.421511	0.759637	0.00840869
0.426233	0.810148	0.00928347	0.464116	0.709422	0.00799959	0.468204	0.70128	0.00718943	0.440883	0.780113	0.00809362	0.488717	0.663326	0.00630271	0.432323	0.76813	0.00830496
0.436566	0.819394	0.00846724	0.474708	0.718325	0.00760793	0.47882	0.710134	0.00753889	0.45095	0.790078	0.00795353	0.498632	0.673444	0.00667706	0.443237	0.776431	0.00847467
[truncated: 253 more rows]

## Sheet: Supp ROC Curve
Rouskins
[truncated: 105 more rows]
