# Supplementary material for: ScanFold 2.0: a rapid approach for identifying potential structured RNA targets in genomes and transcriptomes
Source: PeerJ. 2022 Nov 8;10:e14361. doi: 10.7717/peerj.14361 (PMC9651051; doi:10.7717/peerj.14361)
Supplement: Supplemental Information 4 — The scanning “.out” output data from all SF1 and SF2 run conditions for HIV-1, ZIKA, and SARS-CoV-2. All of the per window z-score data from each of the .out results were added to separate tabs genome tabs and average values were calculated. These values can be found in the last 4 tabs of the excel document. [file peerj-10-14361-s004.xlsx]

## Sheet: Zika SF1 Mono 100
i	j	Temperature	Native_dG	Z-score	P-score	EnsembleDiversity	Sequence	Structure	Centroid	NC_012532.1
1	120	37	-35.7	-2.92	0	10.71	AGUUGUUGAUCUGUGUGAGUCAGACUGCGACAGUUCGAGUCUGAAGCGAGAGCUAACAACAGUAUCAACAGGUUUAAUUUGGAUUUGGAAACGAGAGUUUCUGGUCAUGAAAAACCCCAA	...(((((((((((((...(((((((.(((....))))))))))(((....))).)).)))).)))))))(((((......((((.((((((....)))))))))).....)))))....	...(((((((((((((...(((((((.(((....))))))))))(((....))).)).)))).)))))))(((((......(((..((((((....)))))).))).....)))))....	0.425
2	121	37	-35.7	-2.85	0	10.86	GUUGUUGAUCUGUGUGAGUCAGACUGCGACAGUUCGAGUCUGAAGCGAGAGCUAACAACAGUAUCAACAGGUUUAAUUUGGAUUUGGAAACGAGAGUUUCUGGUCAUGAAAAACCCCAAA	..(((((((((((((...(((((((.(((....))))))))))(((....))).)).)))).)))))))(((((......((((.((((((....)))))))))).....))))).....	..(((((((((((((...(((((((.(((....))))))))))(((....))).)).)))).)))))))(((((......(((..((((((....)))))).))).....))))).....	0.425
3	122	37	-35.7	-3.05	0	10.81	UUGUUGAUCUGUGUGAGUCAGACUGCGACAGUUCGAGUCUGAAGCGAGAGCUAACAACAGUAUCAACAGGUUUAAUUUGGAUUUGGAAACGAGAGUUUCUGGUCAUGAAAAACCCCAAAG	.(((((((((((((...(((((((.(((....))))))))))(((....))).)).)))).)))))))(((((......((((.((((((....)))))))))).....)))))......	.(((((((((((((...(((((((.(((....))))))))))(((....))).)).)))).)))))))(((((......(((..((((((....)))))).))).....)))))......	0.425
4	123	37	-35.5	-3.54	0	10.63	UGUUGAUCUGUGUGAGUCAGACUGCGACAGUUCGAGUCUGAAGCGAGAGCUAACAACAGUAUCAACAGGUUUAAUUUGGAUUUGGAAACGAGAGUUUCUGGUCAUGAAAAACCCCAAAGA	(((((((((((((...(((((((.(((....))))))))))(((....))).)).)))).)))))))(((((......((((.((((((....)))))))))).....))))).......	(((((((((((((...(((((((.(((....))))))))))(((....))).)).)))).)))))))(((((......(((..((((((....)))))).))).....))))).......	0.425
5	124	37	-34.8	-3.18	0	10.34	GUUGAUCUGUGUGAGUCAGACUGCGACAGUUCGAGUCUGAAGCGAGAGCUAACAACAGUAUCAACAGGUUUAAUUUGGAUUUGGAAACGAGAGUUUCUGGUCAUGAAAAACCCCAAAGAA	((((((((((((...(((((((.(((....))))))))))(((....))).)).)))).)))))).(((((......((((.((((((....)))))))))).....)))))........	((((((((((((...(((((((.(((....))))))))))(((....))).)).)))).)))))).(((((......(((..((((((....)))))).))).....)))))........	0.425
6	125	37	-30.9	-1.97	0.05	11.29	UUGAUCUGUGUGAGUCAGACUGCGACAGUUCGAGUCUGAAGCGAGAGCUAACAACAGUAUCAACAGGUUUAAUUUGGAUUUGGAAACGAGAGUUUCUGGUCAUGAAAAACCCCAAAGAAG	(((((((((((...(((((((.(((....))))))))))(((....))).)).)))).)))))..(((((......((((.((((((....)))))))))).....))))).........	(((((((((((...(((((((.(((....))))))))))(((....))).)).)))).)))))..(((((......(((..((((((....)))))).))).....))))).........	0.425
7	126	37	-30.3	-1.75	0.06	11.6	UGAUCUGUGUGAGUCAGACUGCGACAGUUCGAGUCUGAAGCGAGAGCUAACAACAGUAUCAACAGGUUUAAUUUGGAUUUGGAAACGAGAGUUUCUGGUCAUGAAAAACCCCAAAGAAGA	((((((((((...(((((((.(((....))))))))))(((....))).)).)))).))))...(((((......((((.((((((....)))))))))).....)))))..........	((((((((((...(((((((.(((....))))))))))(((....))).)).)))).))))...(((((......(((..((((((....)))))).))).....)))))..........	0.425
8	127	37	-29.6	-1.7	0.06	12.32	GAUCUGUGUGAGUCAGACUGCGACAGUUCGAGUCUGAAGCGAGAGCUAACAACAGUAUCAACAGGUUUAAUUUGGAUUUGGAAACGAGAGUUUCUGGUCAUGAAAAACCCCAAAGAAGAA	(((((((((...(((((((.(((....))))))))))(((....))).)).)))).)))....(((((......((((.((((((....)))))))))).....)))))...........	(((((((((...(((((((.(((....))))))))))(((....))).)).)))).)))....(((((......(((..((((((....)))))).))).....)))))...........	0.425
9	128	37	-27.4	-1.52	0.04	23.17	AUCUGUGUGAGUCAGACUGCGACAGUUCGAGUCUGAAGCGAGAGCUAACAACAGUAUCAACAGGUUUAAUUUGGAUUUGGAAACGAGAGUUUCUGGUCAUGAAAAACCCCAAAGAAGAAA	((((((.(((.(((((((.(((....))))))))))(((....)))..........)))))))))....(((((....((((((....))))))(((........)))))))).......	...........(((((((.(((....))))))))))(((....)))................(((((......((...((((((....))))))..)).....)))))............	0.41667
10	129	37	-26.9	-1.27	0.09	21.85	UCUGUGUGAGUCAGACUGCGACAGUUCGAGUCUGAAGCGAGAGCUAACAACAGUAUCAACAGGUUUAAUUUGGAUUUGGAAACGAGAGUUUCUGGUCAUGAAAAACCCCAAAGAAGAAAU	(((((.(((.(((((((.(((....))))))))))(((....)))..........))))))))(((..(((((....((((((....))))))(((........))))))))..)))...	..........(((((((.(((....))))))))))(((....)))................(((((......(((..((((((....)))))).))).....))))).............	0.41667
11	130	37	-26.6	-0.79	0.2	19.48	CUGUGUGAGUCAGACUGCGACAGUUCGAGUCUGAAGCGAGAGCUAACAACAGUAUCAACAGGUUUAAUUUGGAUUUGGAAACGAGAGUUUCUGGUCAUGAAAAACCCCAAAGAAGAAAUC	((((.(((.(((((((.(((....))))))))))(((....)))..........))))))).(((..(((((....((((((....))))))(((........))))))))..)))....	(((.(....(((((((.(((....))))))))))(((....)))..)..)))........(((((......(((..((((((....)))))).))).....)))))..............	0.425
12	131	37	-25.8	-0.83	0.23	21.07	UGUGUGAGUCAGACUGCGACAGUUCGAGUCUGAAGCGAGAGCUAACAACAGUAUCAACAGGUUUAAUUUGGAUUUGGAAACGAGAGUUUCUGGUCAUGAAAAACCCCAAAGAAGAAAUCC	........(((((((.(((....))))))))))(((....)))................(((((..(((((....((((((....))))))(((........))))))))....))))).	........(((((((.(((....))))))))))(((....)))................(((((......((...((((((....))))))..)).....)))))...............	0.425
13	132	37	-25.8	-0.77	0.19	22.36	GUGUGAGUCAGACUGCGACAGUUCGAGUCUGAAGCGAGAGCUAACAACAGUAUCAACAGGUUUAAUUUGGAUUUGGAAACGAGAGUUUCUGGUCAUGAAAAACCCCAAAGAAGAAAUCCG	.......(((((((.(((....))))))))))(((....)))................(((((..(((((....((((((....))))))(((........))))))))....)))))..	.......(((((((.(((....))))))))))(((....)))................(((((......((...((((((....))))))..)).....)))))................	0.43333
14	133	37	-25.9	-0.83	0.21	23.63	UGUGAGUCAGACUGCGACAGUUCGAGUCUGAAGCGAGAGCUAACAACAGUAUCAACAGGUUUAAUUUGGAUUUGGAAACGAGAGUUUCUGGUCAUGAAAAACCCCAAAGAAGAAAUCCGG	......(((((((.(((....))))))))))(((....)))..............(.(((((..(((((....((((((....))))))(((........))))))))....))))).).	......(((((((.(((....))))))))))(((....)))................((((............((((((....))))))..........)))).................	0.43333
15	134	37	-26.5	-1.09	0.15	23.58	GUGAGUCAGACUGCGACAGUUCGAGUCUGAAGCGAGAGCUAACAACAGUAUCAACAGGUUUAAUUUGGAUUUGGAAACGAGAGUUUCUGGUCAUGAAAAACCCCAAAGAAGAAAUCCGGA	.....(((((((.(((....))))))))))(((....))).......................(((((((((((((((....))))))(((........))).........)))))))))	.....(((((((.(((....))))))))))(((....)))................................((((((....))))))(((........)))..................	0.43333
16	135	37	-27	-1.03	0.13	21.51	UGAGUCAGACUGCGACAGUUCGAGUCUGAAGCGAGAGCUAACAACAGUAUCAACAGGUUUAAUUUGGAUUUGGAAACGAGAGUUUCUGGUCAUGAAAAACCCCAAAGAAGAAAUCCGGAG	....(((((((.(((....))))))))))(((....))).......................(((((((((((((((....))))))(((........))).........))))))))).	....(((((((.(((....))))))))))(((....)))........................((((((((((((((....))))))(((........))).........))))))))..	0.43333
17	136	37	-27	-1.1	0.13	21.98	GAGUCAGACUGCGACAGUUCGAGUCUGAAGCGAGAGCUAACAACAGUAUCAACAGGUUUAAUUUGGAUUUGGAAACGAGAGUUUCUGGUCAUGAAAAACCCCAAAGAAGAAAUCCGGAGG	...(((((((.(((....))))))))))(((....))).......................(((((((((((((((....))))))(((........))).........)))))))))..	...(((((((.(((....))))))))))(((....))).........................((((((.((((((....))))))(((........)))..........))))))....	0.44167
18	137	37	-27	-1.49	0.1	21.62	AGUCAGACUGCGACAGUUCGAGUCUGAAGCGAGAGCUAACAACAGUAUCAACAGGUUUAAUUUGGAUUUGGAAACGAGAGUUUCUGGUCAUGAAAAACCCCAAAGAAGAAAUCCGGAGGA	..(((((((.(((....))))))))))(((....))).......................(((((((((((((((....))))))(((........))).........)))))))))...	..(((((((.(((....))))))))))(((....)))................................((((((....))))))(((........))).....................	0.43333
19	138	37	-27	-1.6	0.06	22.97	GUCAGACUGCGACAGUUCGAGUCUGAAGCGAGAGCUAACAACAGUAUCAACAGGUUUAAUUUGGAUUUGGAAACGAGAGUUUCUGGUCAUGAAAAACCCCAAAGAAGAAAUCCGGAGGAU	.(((((((.(((....))))))))))(((....))).......................(((((((((((((((....))))))(((........))).........)))))))))....	.(((((((.(((....))))))))))(((....)))................................((((((....))))))....................................	0.43333
20	139	37	-27.8	-1.66	0.08	23.44	UCAGACUGCGACAGUUCGAGUCUGAAGCGAGAGCUAACAACAGUAUCAACAGGUUUAAUUUGGAUUUGGAAACGAGAGUUUCUGGUCAUGAAAAACCCCAAAGAAGAAAUCCGGAGGAUC	(((((((.(((....))))))))))(((....)))................(((((..(((((((((((((((....))))))(((........))).........))))))))))))))	(((((((.(((....))))))))))(((....)))................................((((((....))))))(((........))).......................	0.43333
21	140	37	-27	-1.09	0.15	19.24	CAGACUGCGACAGUUCGAGUCUGAAGCGAGAGCUAACAACAGUAUCAACAGGUUUAAUUUGGAUUUGGAAACGAGAGUUUCUGGUCAUGAAAAACCCCAAAGAAGAAAUCCGGAGGAUCC	((((((.(((....))))))))).(((....)))................(((((..(((((((((((((((....))))))(((........))).........)))))))))))))).	((((((.(((....))))))))).(((....))).......................(((((((((((((((....))))))(((........))).........)))))))))......	0.44167
22	141	37	-24.7	-0.29	0.34	25.42	AGACUGCGACAGUUCGAGUCUGAAGCGAGAGCUAACAACAGUAUCAACAGGUUUAAUUUGGAUUUGGAAACGAGAGUUUCUGGUCAUGAAAAACCCCAAAGAAGAAAUCCGGAGGAUCCG	(((((.(((....))))))))..(((....)))................((.((..(((((((((((((((....))))))(((........))).........))))))))).)).)).	(((((.(((....))))))))..(((....))).......................(((((((((((((((....))))))(((........))).........))))))))).......	0.44167
23	142	37	-24.8	-0.27	0.41	23.01	GACUGCGACAGUUCGAGUCUGAAGCGAGAGCUAACAACAGUAUCAACAGGUUUAAUUUGGAUUUGGAAACGAGAGUUUCUGGUCAUGAAAAACCCCAAAGAAGAAAUCCGGAGGAUCCGG	((((.(((....)))))))...(((....)))................(((((......((((.((((((....)))))))))).....))))).............(((((...)))))	((((.((......))))))...(((....)))................(((((......(((..((((((....)))))).))).....))))).............(((((...)))))	0.45
24	143	37	-26.5	-0.96	0.17	14.57	ACUGCGACAGUUCGAGUCUGAAGCGAGAGCUAACAACAGUAUCAACAGGUUUAAUUUGGAUUUGGAAACGAGAGUUUCUGGUCAUGAAAAACCCCAAAGAAGAAAUCCGGAGGAUCCGGA	((((....(((((..((.....))..))))).....)))).......(((((......((((.((((((....)))))))))).....)))))............((((((...))))))	((((....(((((..((.....))..))))).....)))).......(((((......(((..((((((....)))))).))).....)))))............((((((...))))))	0.44167
25	144	37	-26.1	-0.79	0.22	22.68	CUGCGACAGUUCGAGUCUGAAGCGAGAGCUAACAACAGUAUCAACAGGUUUAAUUUGGAUUUGGAAACGAGAGUUUCUGGUCAUGAAAAACCCCAAAGAAGAAAUCCGGAGGAUCCGGAU	........(((.((..(((.(((....))).....)))..))))).(((((......((((.((((((....)))))))))).....)))))...........(((((((...)))))))	..............................................(((((......(((..((((((....)))))).))).....)))))...........(((((((...)))))))	0.44167
26	145	37	-27	-0.97	0.14	21.23	UGCGACAGUUCGAGUCUGAAGCGAGAGCUAACAACAGUAUCAACAGGUUUAAUUUGGAUUUGGAAACGAGAGUUUCUGGUCAUGAAAAACCCCAAAGAAGAAAUCCGGAGGAUCCGGAUU	.......(((.((..(((.(((....))).....)))..))))).(((((......((((.((((((....)))))))))).....)))))..........((((((((...))))))))	....................((....)).................(((((......(((..((((((....)))))).))).....)))))..........((((((((...))))))))	0.43333
27	146	37	-27.8	-1.09	0.11	20.25	GCGACAGUUCGAGUCUGAAGCGAGAGCUAACAACAGUAUCAACAGGUUUAAUUUGGAUUUGGAAACGAGAGUUUCUGGUCAUGAAAAACCCCAAAGAAGAAAUCCGGAGGAUCCGGAUUG	......(((.((..(((.(((....))).....)))..))))).(((((......((((.((((((....)))))))))).....)))))..........((((((((...)))))))).	..........((..(((.(((....))).....)))..))....(((((......(((..((((((....)))))).))).....)))))..........((((((((...)))))))).	0.44167
28	147	37	-27.8	-1.72	0.03	17.34	CGACAGUUCGAGUCUGAAGCGAGAGCUAACAACAGUAUCAACAGGUUUAAUUUGGAUUUGGAAACGAGAGUUUCUGGUCAUGAAAAACCCCAAAGAAGAAAUCCGGAGGAUCCGGAUUGU	.....(((.((..(((.(((....))).....)))..))))).(((((......((((.((((((....)))))))))).....)))))..........((((((((...))))))))..	.....(((.((..(((.(((....))).....)))..))))).(((((......(((..((((((....)))))).))).....)))))..........((((((((...))))))))..	0.43333
29	148	37	-28.2	-1.24	0.1	22.1	GACAGUUCGAGUCUGAAGCGAGAGCUAACAACAGUAUCAACAGGUUUAAUUUGGAUUUGGAAACGAGAGUUUCUGGUCAUGAAAAACCCCAAAGAAGAAAUCCGGAGGAUCCGGAUUGUC	(((.(((.((..(((.(((....))).....)))..))))).(((((......((((.((((((....)))))))))).....)))))..........((((((((...)))))))))))	(((.(((.((..(((.(((....))).....)))..))))).(((((......(((..((((((....)))))).))).....)))))..........((((((((...)))))))))))	0.43333
30	149	37	-28.2	-1.39	0.06	15.87	ACAGUUCGAGUCUGAAGCGAGAGCUAACAACAGUAUCAACAGGUUUAAUUUGGAUUUGGAAACGAGAGUUUCUGGUCAUGAAAAACCCCAAAGAAGAAAUCCGGAGGAUCCGGAUUGUCA	...(((.((..(((.(((....))).....)))..))))).(((((......((((.((((((....)))))))))).....)))))........((((((((((...)))))))).)).	...(((.((..(((.(((....))).....)))..))))).(((((......(((..((((((....)))))).))).....)))))........(.((((((((...))))))))..).	0.425
31	150	37	-28.2	-1.85	0.04	15.58	CAGUUCGAGUCUGAAGCGAGAGCUAACAACAGUAUCAACAGGUUUAAUUUGGAUUUGGAAACGAGAGUUUCUGGUCAUGAAAAACCCCAAAGAAGAAAUCCGGAGGAUCCGGAUUGUCAA	..(((.((..(((.(((....))).....)))..))))).(((((......((((.((((((....)))))))))).....)))))........((((((((((...)))))))).))..	..(((.((..(((.(((....))).....)))..))))).(((((......(((..((((((....)))))).))).....)))))........(.((((((((...))))))))..)..	0.425
32	151	37	-28.2	-1.84	0.07	14.95	AGUUCGAGUCUGAAGCGAGAGCUAACAACAGUAUCAACAGGUUUAAUUUGGAUUUGGAAACGAGAGUUUCUGGUCAUGAAAAACCCCAAAGAAGAAAUCCGGAGGAUCCGGAUUGUCAAU	.(((.((..(((.(((....))).....)))..))))).(((((......((((.((((((....)))))))))).....)))))........((((((((((...)))))))).))...	.(((.((..(((.(((....))).....)))..))))).(((((......(((..((((((....)))))).))).....)))))........(.((((((((...))))))))..)...	0.41667
33	152	37	-28.4	-1.8	0.05	10.81	GUUCGAGUCUGAAGCGAGAGCUAACAACAGUAUCAACAGGUUUAAUUUGGAUUUGGAAACGAGAGUUUCUGGUCAUGAAAAACCCCAAAGAAGAAAUCCGGAGGAUCCGGAUUGUCAAUA	(((.((..(((.(((....))).....)))..))))).(((((......((((.((((((....)))))))))).....)))))........((((((((((...)))))))).))....	(((.((..(((.(((....))).....)))..))))).(((((......(((..((((((....)))))).))).....)))))........(.((((((((...))))))))..)....	0.41667
34	153	37	-26.8	-1.87	0.05	12.72	UUCGAGUCUGAAGCGAGAGCUAACAACAGUAUCAACAGGUUUAAUUUGGAUUUGGAAACGAGAGUUUCUGGUCAUGAAAAACCCCAAAGAAGAAAUCCGGAGGAUCCGGAUUGUCAAUAU	...((..(((.(((....))).....)))..))....(((((......((((.((((((....)))))))))).....)))))........((((((((((...)))))))).)).....	...((..(((.(((....))).....)))..))....(((((......(((..((((((....)))))).))).....)))))........(.((((((((...))))))))..).....	0.40833
35	154	37	-26.8	-1.6	0.09	11.97	UCGAGUCUGAAGCGAGAGCUAACAACAGUAUCAACAGGUUUAAUUUGGAUUUGGAAACGAGAGUUUCUGGUCAUGAAAAACCCCAAAGAAGAAAUCCGGAGGAUCCGGAUUGUCAAUAUG	..((..(((.(((....))).....)))..))....(((((......((((.((((((....)))))))))).....)))))........((((((((((...)))))))).))......	..((..(((.(((....))).....)))..))....(((((......(((..((((((....)))))).))).....)))))........(.((((((((...))))))))..)......	0.41667
36	155	37	-26.8	-1.31	0.07	11.69	CGAGUCUGAAGCGAGAGCUAACAACAGUAUCAACAGGUUUAAUUUGGAUUUGGAAACGAGAGUUUCUGGUCAUGAAAAACCCCAAAGAAGAAAUCCGGAGGAUCCGGAUUGUCAAUAUGC	.((..(((.(((....))).....)))..))....(((((......((((.((((((....)))))))))).....)))))........((((((((((...)))))))).)).......	.((..(((.(((....))).....)))..))....(((((......(((..((((((....)))))).))).....)))))..........((((((((...))))))))..........	0.425
37	156	37	-27	-1.52	0.06	11.92	GAGUCUGAAGCGAGAGCUAACAACAGUAUCAACAGGUUUAAUUUGGAUUUGGAAACGAGAGUUUCUGGUCAUGAAAAACCCCAAAGAAGAAAUCCGGAGGAUCCGGAUUGUCAAUAUGCU	((..(((.(((....))).....)))..))....(((((......((((.((((((....)))))))))).....)))))........((((((((((...)))))))).))........	((..(((.(((....))).....)))..))....(((((......(((..((((((....)))))).))).....)))))..........((((((((...))))))))...........	0.41667
38	157	37	-24.6	-0.98	0.18	19.82	AGUCUGAAGCGAGAGCUAACAACAGUAUCAACAGGUUUAAUUUGGAUUUGGAAACGAGAGUUUCUGGUCAUGAAAAACCCCAAAGAAGAAAUCCGGAGGAUCCGGAUUGUCAAUAUGCUA	.......(((....)))......(((((.....(((((......((((.((((((....)))))))))).....)))))........((((((((((...)))))))).))...))))).	.......(((....)))................(((((......(((..((((((....)))))).))).....)))))..........((((((((...))))))))............	0.40833
39	158	37	-24.6	-0.97	0.16	19.19	GUCUGAAGCGAGAGCUAACAACAGUAUCAACAGGUUUAAUUUGGAUUUGGAAACGAGAGUUUCUGGUCAUGAAAAACCCCAAAGAAGAAAUCCGGAGGAUCCGGAUUGUCAAUAUGCUAA	......(((....)))......(((((.....(((((......((((.((((((....)))))))))).....)))))........((((((((((...)))))))).))...)))))..	......(((....)))................(((((......(((..((((((....)))))).))).....)))))..........((((((((...)))))))).............	0.40833
40	159	37	-24.6	-1.05	0.14	19.09	UCUGAAGCGAGAGCUAACAACAGUAUCAACAGGUUUAAUUUGGAUUUGGAAACGAGAGUUUCUGGUCAUGAAAAACCCCAAAGAAGAAAUCCGGAGGAUCCGGAUUGUCAAUAUGCUAAA	.....(((....)))......(((((.....(((((......((((.((((((....)))))))))).....)))))........((((((((((...)))))))).))...)))))...	.....(((....)))................(((((......(((..((((((....)))))).))).....)))))..........((((((((...))))))))..............	0.4
41	160	37	-24.6	-1.38	0.09	18.88	CUGAAGCGAGAGCUAACAACAGUAUCAACAGGUUUAAUUUGGAUUUGGAAACGAGAGUUUCUGGUCAUGAAAAACCCCAAAGAAGAAAUCCGGAGGAUCCGGAUUGUCAAUAUGCUAAAA	....(((....)))......(((((.....(((((......((((.((((((....)))))))))).....)))))........((((((((((...)))))))).))...)))))....	....(((....)))................(((((......(((..((((((....)))))).))).....)))))..........((((((((...))))))))...............	0.4
42	161	37	-24.6	-1.5	0.06	18.76	UGAAGCGAGAGCUAACAACAGUAUCAACAGGUUUAAUUUGGAUUUGGAAACGAGAGUUUCUGGUCAUGAAAAACCCCAAAGAAGAAAUCCGGAGGAUCCGGAUUGUCAAUAUGCUAAAAC	...(((....)))......(((((.....(((((......((((.((((((....)))))))))).....)))))........((((((((((...)))))))).))...))))).....	...(((....)))................(((((......(((..((((((....)))))).))).....)))))..........((((((((...))))))))................	0.4
43	162	37	-24.6	-1.27	0.09	18.51	GAAGCGAGAGCUAACAACAGUAUCAACAGGUUUAAUUUGGAUUUGGAAACGAGAGUUUCUGGUCAUGAAAAACCCCAAAGAAGAAAUCCGGAGGAUCCGGAUUGUCAAUAUGCUAAAACG	..(((....)))......(((((.....(((((......((((.((((((....)))))))))).....)))))........((((((((((...)))))))).))...)))))......	..(((....)))................(((((......(((..((((((....)))))).))).....)))))..........((((((((...)))))))).................	0.40833
44	163	37	-24.6	-1.37	0.09	20.71	AAGCGAGAGCUAACAACAGUAUCAACAGGUUUAAUUUGGAUUUGGAAACGAGAGUUUCUGGUCAUGAAAAACCCCAAAGAAGAAAUCCGGAGGAUCCGGAUUGUCAAUAUGCUAAAACGC	.(((....)))......(((((.....(((((......((((.((((((....)))))))))).....)))))........((((((((((...)))))))).))...))))).......	...........................(((((......(((..((((((....)))))).))).....)))))..........((((((((...))))))))..................	0.40833
45	164	37	-25.7	-1.33	0.08	18.22	AGCGAGAGCUAACAACAGUAUCAACAGGUUUAAUUUGGAUUUGGAAACGAGAGUUUCUGGUCAUGAAAAACCCCAAAGAAGAAAUCCGGAGGAUCCGGAUUGUCAAUAUGCUAAAACGCG	.(((..(((.................(((((......((((.((((((....)))))))))).....)))))........((((((((((...)))))))).)).....)))....))).	.(((..(((.................(((((......(((..((((((....)))))).))).....)))))..........((((((((...))))))))........)))....))).	0.41667
46	165	37	-26	-1.4	0.07	15.68	GCGAGAGCUAACAACAGUAUCAACAGGUUUAAUUUGGAUUUGGAAACGAGAGUUUCUGGUCAUGAAAAACCCCAAAGAAGAAAUCCGGAGGAUCCGGAUUGUCAAUAUGCUAAAACGCGG	(((..(((.................(((((......((((.((((((....)))))))))).....)))))........((((((((((...)))))))).)).....)))....)))..	(((..(((.................(((((......(((..((((((....)))))).))).....)))))..........((((((((...))))))))........)))....)))..	0.425
47	166	37	-23.2	-0.6	0.27	17.05	CGAGAGCUAACAACAGUAUCAACAGGUUUAAUUUGGAUUUGGAAACGAGAGUUUCUGGUCAUGAAAAACCCCAAAGAAGAAAUCCGGAGGAUCCGGAUUGUCAAUAUGCUAAAACGCGGA	.((..(((......))).))....(((((......((((.((((((....)))))))))).....)))))........((((((((((...)))))))).)).....((......))...	.....(((......))).......(((((......(((..((((((....)))))).))).....)))))..........((((((((...))))))))........((......))...	0.41667
48	167	37	-23.4	-0.65	0.25	15.9	GAGAGCUAACAACAGUAUCAACAGGUUUAAUUUGGAUUUGGAAACGAGAGUUUCUGGUCAUGAAAAACCCCAAAGAAGAAAUCCGGAGGAUCCGGAUUGUCAAUAUGCUAAAACGCGGAG	((..(((......))).))....(((((......((((.((((((....)))))))))).....)))))........((((((((((...)))))))).)).....((......))....	....(((......))).......(((((......(((..((((((....)))))).))).....)))))..........((((((((...))))))))........((......))....	0.41667
49	168	37	-22.6	-0.61	0.27	17.6	AGAGCUAACAACAGUAUCAACAGGUUUAAUUUGGAUUUGGAAACGAGAGUUUCUGGUCAUGAAAAACCCCAAAGAAGAAAUCCGGAGGAUCCGGAUUGUCAAUAUGCUAAAACGCGGAGU	.(((((......))).))....(((((......((((.((((((....)))))))))).....)))))........((((((((((...)))))))).)).....((......)).....	......................(((((......(((..((((((....)))))).))).....)))))..........((((((((...))))))))........((......)).....	0.40833
50	169	37	-22.8	-0.57	0.2	18.09	GAGCUAACAACAGUAUCAACAGGUUUAAUUUGGAUUUGGAAACGAGAGUUUCUGGUCAUGAAAAACCCCAAAGAAGAAAUCCGGAGGAUCCGGAUUGUCAAUAUGCUAAAACGCGGAGUA	(((((......))).))....(((((......((((.((((((....)))))))))).....)))))........((((((((((...)))))))).)).....((......))......	.....................(((((......(((..((((((....)))))).))).....)))))..........((((((((...))))))))........((......))......	0.40833
51	170	37	-22.4	-0.42	0.31	18.01	AGCUAACAACAGUAUCAACAGGUUUAAUUUGGAUUUGGAAACGAGAGUUUCUGGUCAUGAAAAACCCCAAAGAAGAAAUCCGGAGGAUCCGGAUUGUCAAUAUGCUAAAACGCGGAGUAG	....................(((((......((((.((((((....)))))))))).....)))))........((((((((((...)))))))).)).....((......)).......	....................(((((......(((..((((((....)))))).))).....)))))..........((((((((...))))))))........((......)).......	0.40833
52	171	37	-23.8	-0.73	0.22	16.73	GCUAACAACAGUAUCAACAGGUUUAAUUUGGAUUUGGAAACGAGAGUUUCUGGUCAUGAAAAACCCCAAAGAAGAAAUCCGGAGGAUCCGGAUUGUCAAUAUGCUAAAACGCGGAGUAGC	((((...............(((((......((((.((((((....)))))))))).....)))))........((((((((((...)))))))).)).....((......))....))))	((((...............(((((......(((..((((((....)))))).))).....)))))........(.((((((((...))))))))..).....((......))....))))	0.41667
53	172	37	-23.3	-0.58	0.23	18.19	CUAACAACAGUAUCAACAGGUUUAAUUUGGAUUUGGAAACGAGAGUUUCUGGUCAUGAAAAACCCCAAAGAAGAAAUCCGGAGGAUCCGGAUUGUCAAUAUGCUAAAACGCGGAGUAGCC	........(((((.....(((((......((((.((((((....)))))))))).....)))))........((((((((((...)))))))).))...))))).....((......)).	..................(((((......(((..((((((....)))))).))).....)))))..........((((((((...))))))))...........................	0.41667
54	173	37	-23.3	-0.63	0.27	18.56	UAACAACAGUAUCAACAGGUUUAAUUUGGAUUUGGAAACGAGAGUUUCUGGUCAUGAAAAACCCCAAAGAAGAAAUCCGGAGGAUCCGGAUUGUCAAUAUGCUAAAACGCGGAGUAGCCC	.......(((((.....(((((......((((.((((((....)))))))))).....)))))........((((((((((...)))))))).))...))))).....((......))..	.................(((((......(((..((((((....)))))).))).....)))))..........((((((((...))))))))............................	0.41667
55	174	37	-23.9	-0.6	0.24	18.6	AACAACAGUAUCAACAGGUUUAAUUUGGAUUUGGAAACGAGAGUUUCUGGUCAUGAAAAACCCCAAAGAAGAAAUCCGGAGGAUCCGGAUUGUCAAUAUGCUAAAACGCGGAGUAGCCCG	......(((((.....(((((......((((.((((((....)))))))))).....)))))........((((((((((...)))))))).))...)))))......(((......)))	................(((((......(((..((((((....)))))).))).....)))))..........((((((((...))))))))..................(........).	0.425
56	175	37	-26	-1.12	0.15	16	ACAACAGUAUCAACAGGUUUAAUUUGGAUUUGGAAACGAGAGUUUCUGGUCAUGAAAAACCCCAAAGAAGAAAUCCGGAGGAUCCGGAUUGUCAAUAUGCUAAAACGCGGAGUAGCCCGU	.....(((((.....(((((......((((.((((((....)))))))))).....)))))........((((((((((...)))))))).))...))))).....((((......))))	.....((((......(((((......(((..((((((....)))))).))).....)))))..........((((((((...)))))))).......)))).....((((......))))	0.425
57	176	37	-28.1	-1.3	0.09	13.92	CAACAGUAUCAACAGGUUUAAUUUGGAUUUGGAAACGAGAGUUUCUGGUCAUGAAAAACCCCAAAGAAGAAAUCCGGAGGAUCCGGAUUGUCAAUAUGCUAAAACGCGGAGUAGCCCGUG	....(((((.....(((((......((((.((((((....)))))))))).....)))))........((((((((((...)))))))).))...)))))....(((((......)))))	....(((((.....(((((......(((..((((((....)))))).))).....)))))..........((((((((...))))))))......)))))....(((((......)))))	0.43333
58	177	37	-29.6	-2.31	0.01	13.79	AACAGUAUCAACAGGUUUAAUUUGGAUUUGGAAACGAGAGUUUCUGGUCAUGAAAAACCCCAAAGAAGAAAUCCGGAGGAUCCGGAUUGUCAAUAUGCUAAAACGCGGAGUAGCCCGUGU	...(((((.....(((((......((((.((((((....)))))))))).....)))))........((((((((((...)))))))).))...)))))...((((((......))))))	...(((((.....(((((......(((..((((((....)))))).))).....)))))..........((((((((...))))))))......)))))...((((((......))))))	0.425
59	178	37	-30.3	-2.55	0	13.54	ACAGUAUCAACAGGUUUAAUUUGGAUUUGGAAACGAGAGUUUCUGGUCAUGAAAAACCCCAAAGAAGAAAUCCGGAGGAUCCGGAUUGUCAAUAUGCUAAAACGCGGAGUAGCCCGUGUA	..(((((.....(((((......((((.((((((....)))))))))).....)))))........((((((((((...)))))))).))...)))))...((((((......)))))).	..(((((.....(((((......(((..((((((....)))))).))).....)))))..........((((((((...))))))))......)))))...((((((......)))))).	0.425
60	179	37	-30.3	-2.07	0.02	13.4	CAGUAUCAACAGGUUUAAUUUGGAUUUGGAAACGAGAGUUUCUGGUCAUGAAAAACCCCAAAGAAGAAAUCCGGAGGAUCCGGAUUGUCAAUAUGCUAAAACGCGGAGUAGCCCGUGUAA	.(((((.....(((((......((((.((((((....)))))))))).....)))))........((((((((((...)))))))).))...)))))...((((((......))))))..	.(((((.....(((((......(((..((((((....)))))).))).....)))))..........((((((((...))))))))......)))))...((((((......))))))..	0.425
61	180	37	-30.2	-2.12	0.03	13.43	AGUAUCAACAGGUUUAAUUUGGAUUUGGAAACGAGAGUUUCUGGUCAUGAAAAACCCCAAAGAAGAAAUCCGGAGGAUCCGGAUUGUCAAUAUGCUAAAACGCGGAGUAGCCCGUGUAAA	(((((.....(((((......((((.((((((....)))))))))).....)))))........((((((((((...)))))))).))...)))))...((((((......))))))...	(((((.....(((((......(((..((((((....)))))).))).....)))))..........((((((((...))))))))......)))))...((((((......))))))...	0.41667
62	181	37	-29.9	-1.96	0.03	12.73	GUAUCAACAGGUUUAAUUUGGAUUUGGAAACGAGAGUUUCUGGUCAUGAAAAACCCCAAAGAAGAAAUCCGGAGGAUCCGGAUUGUCAAUAUGCUAAAACGCGGAGUAGCCCGUGUAAAC	.........(((((......((((.((((((....)))))))))).....)))))........((((((((((...)))))))).))...........((((((......))))))....	.........(((((......(((..((((((....)))))).))).....)))))..........((((((((...))))))))..............((((((......))))))....	0.425
63	182	37	-30.3	-2.03	0.04	15.78	UAUCAACAGGUUUAAUUUGGAUUUGGAAACGAGAGUUUCUGGUCAUGAAAAACCCCAAAGAAGAAAUCCGGAGGAUCCGGAUUGUCAAUAUGCUAAAACGCGGAGUAGCCCGUGUAAACC	........(((((..(((((....((((((....))))))(((........))))))))...((((((((((...)))))))).))...........((((((......)))))))))))	........(((((......((...((((((....))))))..)).....)))))..........((((((((...))))))))..............((((((......)))))).....	0.425
64	183	37	-31.1	-2.33	0.02	17.42	AUCAACAGGUUUAAUUUGGAUUUGGAAACGAGAGUUUCUGGUCAUGAAAAACCCCAAAGAAGAAAUCCGGAGGAUCCGGAUUGUCAAUAUGCUAAAACGCGGAGUAGCCCGUGUAAACCC	.......(((((..(((((....((((((....))))))(((........))))))))...((((((((((...)))))))).))...........((((((......))))))))))).	.......((((............((((((....))))))........................((((((((...))))))))..............((((((......)))))).)))).	0.43333
65	184	37	-31.1	-1.95	0.04	17.44	UCAACAGGUUUAAUUUGGAUUUGGAAACGAGAGUUUCUGGUCAUGAAAAACCCCAAAGAAGAAAUCCGGAGGAUCCGGAUUGUCAAUAUGCUAAAACGCGGAGUAGCCCGUGUAAACCCC	......(((((..(((((....((((((....))))))(((........))))))))...((((((((((...)))))))).))...........((((((......)))))))))))..	......((((............((((((....))))))........................((((((((...))))))))..............((((((......)))))).))))..	0.44167
66	185	37	-31.1	-2.08	0.02	17.37	CAACAGGUUUAAUUUGGAUUUGGAAACGAGAGUUUCUGGUCAUGAAAAACCCCAAAGAAGAAAUCCGGAGGAUCCGGAUUGUCAAUAUGCUAAAACGCGGAGUAGCCCGUGUAAACCCCU	.....(((((..(((((....((((((....))))))(((........))))))))...((((((((((...)))))))).))...........((((((......)))))))))))...	.....((((............((((((....))))))........................((((((((...))))))))..............((((((......)))))).))))...	0.44167
67	186	37	-31.1	-2.26	0.03	17.54	AACAGGUUUAAUUUGGAUUUGGAAACGAGAGUUUCUGGUCAUGAAAAACCCCAAAGAAGAAAUCCGGAGGAUCCGGAUUGUCAAUAUGCUAAAACGCGGAGUAGCCCGUGUAAACCCCUU	....(((((..(((((....((((((....))))))(((........))))))))...((((((((((...)))))))).))...........((((((......)))))))))))....	....((((............((((((....))))))........................((((((((...))))))))..............((((((......)))))).))))....	0.43333
68	187	37	-31.1	-1.9	0.03	18.02	ACAGGUUUAAUUUGGAUUUGGAAACGAGAGUUUCUGGUCAUGAAAAACCCCAAAGAAGAAAUCCGGAGGAUCCGGAUUGUCAAUAUGCUAAAACGCGGAGUAGCCCGUGUAAACCCCUUG	...(((((..(((((....((((((....))))))(((........))))))))...((((((((((...)))))))).))...........((((((......))))))))))).....	...((((............((((((....))))))........................((((((((...))))))))..............((((((......)))))).)))).....	0.44167
69	188	37	-31.1	-1.82	0.03	17.08	CAGGUUUAAUUUGGAUUUGGAAACGAGAGUUUCUGGUCAUGAAAAACCCCAAAGAAGAAAUCCGGAGGAUCCGGAUUGUCAAUAUGCUAAAACGCGGAGUAGCCCGUGUAAACCCCUUGG	..(((((..(((((....((((((....))))))(((........))))))))...((((((((((...)))))))).))...........((((((......)))))))))))......	..(((((......(((..((((((....)))))).))).....)))))(((.....(.((((((((...))))))))..)...........((((((......))))))........)))	0.45
70	189	37	-31.6	-1.56	0.05	14.37	AGGUUUAAUUUGGAUUUGGAAACGAGAGUUUCUGGUCAUGAAAAACCCCAAAGAAGAAAUCCGGAGGAUCCGGAUUGUCAAUAUGCUAAAACGCGGAGUAGCCCGUGUAAACCCCUUGGG	.(((((......((((.((((((....)))))))))).....)))))((((....((((((((((...)))))))).))...........((((((......)))))).......)))).	.(((((......(((..((((((....)))))).))).....)))))(((.....(.((((((((...))))))))..)...........((((((......))))))........))).	0.45
71	190	37	-32	-2.31	0.01	15.44	GGUUUAAUUUGGAUUUGGAAACGAGAGUUUCUGGUCAUGAAAAACCCCAAAGAAGAAAUCCGGAGGAUCCGGAUUGUCAAUAUGCUAAAACGCGGAGUAGCCCGUGUAAACCCCUUGGGA	(((((......((((.((((((....)))))))))).....)))))........((((((((((...)))))))).))...........((((((......))))))...(((...))).	(((((......(((..((((((....)))))).))).....)))))(((.....(.((((((((...))))))))..)...........((((((......))))))........)))..	0.45
72	191	37	-31.4	-1.6	0.03	12.62	GUUUAAUUUGGAUUUGGAAACGAGAGUUUCUGGUCAUGAAAAACCCCAAAGAAGAAAUCCGGAGGAUCCGGAUUGUCAAUAUGCUAAAACGCGGAGUAGCCCGUGUAAACCCCUUGGGAG	((((......((((.((((((....)))))))))).....))))(((((....((((((((((...)))))))).))...........((((((......)))))).......)))))..	((((......(((..((((((....)))))).))).....))))(((((....(.((((((((...))))))))..)...........((((((......)))))).......)))))..	0.45
73	192	37	-31.1	-1.48	0.1	12.18	UUUAAUUUGGAUUUGGAAACGAGAGUUUCUGGUCAUGAAAAACCCCAAAGAAGAAAUCCGGAGGAUCCGGAUUGUCAAUAUGCUAAAACGCGGAGUAGCCCGUGUAAACCCCUUGGGAGG	.........((((.((((((....)))))))))).........(((((....((((((((((...)))))))).))...........((((((......)))))).......)))))...	.........(((..((((((....)))))).))).........(((((....(.((((((((...))))))))..)...........((((((......)))))).......)))))...	0.45
74	193	37	-31.1	-1.88	0.04	14.91	UUAAUUUGGAUUUGGAAACGAGAGUUUCUGGUCAUGAAAAACCCCAAAGAAGAAAUCCGGAGGAUCCGGAUUGUCAAUAUGCUAAAACGCGGAGUAGCCCGUGUAAACCCCUUGGGAGGU	........((((.((((((....)))))))))).........(((((....((((((((((...)))))))).))...........((((((......)))))).......)))))....	........(((..((((((....)))))).))).........((((.....(.((((((((...))))))))..)...........((((((......))))))........))))....	0.45
75	194	37	-31.8	-1.99	0.04	16.77	UAAUUUGGAUUUGGAAACGAGAGUUUCUGGUCAUGAAAAACCCCAAAGAAGAAAUCCGGAGGAUCCGGAUUGUCAAUAUGCUAAAACGCGGAGUAGCCCGUGUAAACCCCUUGGGAGGUU	...(((((....((((((....))))))(((........))))))))...((((((((((...)))))))).))...........((((((......)))))).((((((...)).))))	.......(((..((((((....)))))).))).......(((....((..(.((((((((...))))))))..)...........((((((......))))))......)).....))).	0.45
76	195	37	-32.7	-2.25	0.02	15.87	AAUUUGGAUUUGGAAACGAGAGUUUCUGGUCAUGAAAAACCCCAAAGAAGAAAUCCGGAGGAUCCGGAUUGUCAAUAUGCUAAAACGCGGAGUAGCCCGUGUAAACCCCUUGGGAGGUUU	......((((.((((((....)))))))))).....(((((((.(((..((((((((((...)))))))).))...........((((((......))))))......))).)).)))))	......(((..((((((....)))))).)))......((((((..((..(.((((((((...))))))))..)...........((((((......))))))......))..)).)))).	0.45
77	196	37	-33.5	-2.14	0.02	14.7	AUUUGGAUUUGGAAACGAGAGUUUCUGGUCAUGAAAAACCCCAAAGAAGAAAUCCGGAGGAUCCGGAUUGUCAAUAUGCUAAAACGCGGAGUAGCCCGUGUAAACCCCUUGGGAGGUUUG	.....((((.((((((....)))))))))).....(((((((.(((..((((((((((...)))))))).))...........((((((......))))))......))).)).))))).	.....(((..((((((....)))))).))).....(((((((..((..(.((((((((...))))))))..)...........((((((......))))))......))..)).))))).	0.45833
78	197	37	-33.5	-2.05	0.02	15.22	UUUGGAUUUGGAAACGAGAGUUUCUGGUCAUGAAAAACCCCAAAGAAGAAAUCCGGAGGAUCCGGAUUGUCAAUAUGCUAAAACGCGGAGUAGCCCGUGUAAACCCCUUGGGAGGUUUGA	....((((.((((((....)))))))))).....(((((((.(((..((((((((((...)))))))).))...........((((((......))))))......))).)).)))))..	....(((..((((((....)))))).))).....(((((((..((..(.((((((((...))))))))..)...........((((((......))))))......))..)).)))))..	0.45833
79	198	37	-33.5	-2.08	0.01	12.99	UUGGAUUUGGAAACGAGAGUUUCUGGUCAUGAAAAACCCCAAAGAAGAAAUCCGGAGGAUCCGGAUUGUCAAUAUGCUAAAACGCGGAGUAGCCCGUGUAAACCCCUUGGGAGGUUUGAA	...((((.((((((....)))))))))).....(((((((.(((..((((((((((...)))))))).))...........((((((......))))))......))).)).)))))...	...(((..((((((....)))))).))).....(((((((..((..(.((((((((...))))))))..)...........((((((......))))))......))..)).)))))...	0.45833
80	199	37	-33.5	-1.89	0.05	11.77	UGGAUUUGGAAACGAGAGUUUCUGGUCAUGAAAAACCCCAAAGAAGAAAUCCGGAGGAUCCGGAUUGUCAAUAUGCUAAAACGCGGAGUAGCCCGUGUAAACCCCUUGGGAGGUUUGAAG	..((((.((((((....)))))))))).....(((((((.(((..((((((((((...)))))))).))...........((((((......))))))......))).)).)))))....	..(((..((((((....)))))).))).....(((((((..((..(.((((((((...))))))))..)...........((((((......))))))......))..)).)))))....	0.46667
81	200	37	-33.5	-2.65	0.01	11.41	GGAUUUGGAAACGAGAGUUUCUGGUCAUGAAAAACCCCAAAGAAGAAAUCCGGAGGAUCCGGAUUGUCAAUAUGCUAAAACGCGGAGUAGCCCGUGUAAACCCCUUGGGAGGUUUGAAGA	.((((.((((((....)))))))))).....(((((((.(((..((((((((((...)))))))).))...........((((((......))))))......))).)).))))).....	.(((..((((((....)))))).))).....(((((((..((..(.((((((((...))))))))..)...........((((((......))))))......))..)).))))).....	0.46667
82	201	37	-33.8	-2.32	0.01	11.09	GAUUUGGAAACGAGAGUUUCUGGUCAUGAAAAACCCCAAAGAAGAAAUCCGGAGGAUCCGGAUUGUCAAUAUGCUAAAACGCGGAGUAGCCCGUGUAAACCCCUUGGGAGGUUUGAAGAG	((((.((((((....)))))))))).....(((((((.(((..((((((((((...)))))))).))...........((((((......))))))......))).)).)))))......	(((..((((((....)))))).))).....(((((((..((..(.((((((((...))))))))..)...........((((((......))))))......))..)).)))))......	0.46667
83	202	37	-32.2	-1.79	0.03	13.74	AUUUGGAAACGAGAGUUUCUGGUCAUGAAAAACCCCAAAGAAGAAAUCCGGAGGAUCCGGAUUGUCAAUAUGCUAAAACGCGGAGUAGCCCGUGUAAACCCCUUGGGAGGUUUGAAGAGG	....((((((....)))))).........(((((((.(((..((((((((((...)))))))).))...........((((((......))))))......))).)).))))).......	...(((((((....)))))))........(((((((..((..(.((((((((...))))))))..)...........((((((......))))))......))..)).))))).......	0.46667
84	203	37	-32.2	-2.05	0.03	15.34	UUUGGAAACGAGAGUUUCUGGUCAUGAAAAACCCCAAAGAAGAAAUCCGGAGGAUCCGGAUUGUCAAUAUGCUAAAACGCGGAGUAGCCCGUGUAAACCCCUUGGGAGGUUUGAAGAGGU	...((((((....)))))).........(((((((.(((..((((((((((...)))))))).))...........((((((......))))))......))).)).)))))........	..(((((((....)))))))........(((((((..((..(.((((((((...))))))))..)...........((((((......))))))......))..)).)))))........	0.46667
85	204	37	-32.2	-1.73	0.06	18.01	UUGGAAACGAGAGUUUCUGGUCAUGAAAAACCCCAAAGAAGAAAUCCGGAGGAUCCGGAUUGUCAAUAUGCUAAAACGCGGAGUAGCCCGUGUAAACCCCUUGGGAGGUUUGAAGAGGUU	..((((((....)))))).........(((((((.(((..((((((((((...)))))))).))...........((((((......))))))......))).)).))))).........	.(((((((....)))))))........(((((....((..(.((((((((...))))))))..)...........((((((......))))))......)).....))))).........	0.46667
86	205	37	-32.3	-1.7	0.05	18.79	UGGAAACGAGAGUUUCUGGUCAUGAAAAACCCCAAAGAAGAAAUCCGGAGGAUCCGGAUUGUCAAUAUGCUAAAACGCGGAGUAGCCCGUGUAAACCCCUUGGGAGGUUUGAAGAGGUUG	.((((((....))))))..........((((.(......((((((((((...)))))))).))...........((((((......))))))(((((((...)).)))))...).)))).	.((((((....))))))......................(.((((((((...))))))))..)...........((((((......))))))............................	0.475
87	206	37	-32.2	-1.73	0.02	23.79	GGAAACGAGAGUUUCUGGUCAUGAAAAACCCCAAAGAAGAAAUCCGGAGGAUCCGGAUUGUCAAUAUGCUAAAACGCGGAGUAGCCCGUGUAAACCCCUUGGGAGGUUUGAAGAGGUUGC	((((((....))))))..........((((.(......((((((((((...)))))))).))...........((((((......))))))(((((((...)).)))))...).))))..	((((((....))))))......................(.((((((((...))))))))..)...........((((((......))))))(((((((...)).)))))...........	0.48333
88	207	37	-32.1	-1.37	0.08	26.04	GAAACGAGAGUUUCUGGUCAUGAAAAACCCCAAAGAAGAAAUCCGGAGGAUCCGGAUUGUCAAUAUGCUAAAACGCGGAGUAGCCCGUGUAAACCCCUUGGGAGGUUUGAAGAGGUUGCC	(((((....))))).(((.((...(((((((.(((..((((((((((...)))))))).))...........((((((......))))))......))).)).)))))......)).)))	(((((....))))).......................(.((((((((...))))))))..)............(((((......))))).(((((((...)).)))))............	0.48333
89	208	37	-29.8	-1.02	0.17	29.74	AAACGAGAGUUUCUGGUCAUGAAAAACCCCAAAGAAGAAAUCCGGAGGAUCCGGAUUGUCAAUAUGCUAAAACGCGGAGUAGCCCGUGUAAACCCCUUGGGAGGUUUGAAGAGGUUGCCA	((((....)))).((((.((...(((((((.(((..((((((((((...)))))))).))...........((((((......))))))......))).)).)))))......)).))))	..............((....................(.((((((((...))))))))..)...........((((((......))))))............................)).	0.475
90	209	37	-32.1	-1.29	0.11	16.63	AACGAGAGUUUCUGGUCAUGAAAAACCCCAAAGAAGAAAUCCGGAGGAUCCGGAUUGUCAAUAUGCUAAAACGCGGAGUAGCCCGUGUAAACCCCUUGGGAGGUUUGAAGAGGUUGCCAG	...........(((((.((...(((((((.(((..((((((((((...)))))))).))...........((((((......))))))......))).)).)))))......)).)))))	...........(((((......(((((((..((..(.((((((((...))))))))..)...........((((((......))))))......))..)).))))).........)))))	0.48333
91	210	37	-32.5	-1.34	0.09	15.74	ACGAGAGUUUCUGGUCAUGAAAAACCCCAAAGAAGAAAUCCGGAGGAUCCGGAUUGUCAAUAUGCUAAAACGCGGAGUAGCCCGUGUAAACCCCUUGGGAGGUUUGAAGAGGUUGCCAGC	..........(((((.((...(((((((.(((..((((((((((...)))))))).))...........((((((......))))))......))).)).)))))......)).))))).	..........(((((......(((((((..((..(.((((((((...))))))))..)...........((((((......))))))......))..)).))))).........))))).	0.49167
92	211	37	-32.5	-0.83	0.23	17.89	CGAGAGUUUCUGGUCAUGAAAAACCCCAAAGAAGAAAUCCGGAGGAUCCGGAUUGUCAAUAUGCUAAAACGCGGAGUAGCCCGUGUAAACCCCUUGGGAGGUUUGAAGAGGUUGCCAGCC	.........(((((.((...(((((((.(((..((((((((((...)))))))).))...........((((((......))))))......))).)).)))))......)).)))))..	.........(((((......(((((((..((..(.((((((((...))))))))..)...........((((((......))))))......))..)).))))).........)))))..	0.5
93	212	37	-32.5	-1.12	0.12	21.72	GAGAGUUUCUGGUCAUGAAAAACCCCAAAGAAGAAAUCCGGAGGAUCCGGAUUGUCAAUAUGCUAAAACGCGGAGUAGCCCGUGUAAACCCCUUGGGAGGUUUGAAGAGGUUGCCAGCCG	........(((((.((...(((((((.(((..((((((((((...)))))))).))...........((((((......))))))......))).)).)))))......)).)))))...	........(((((......(((((((..((..(.((((((((...))))))))..)...........((((((......))))))......))..)).))))).........)))))...	0.5
94	213	37	-32.5	-1.01	0.16	29.9	AGAGUUUCUGGUCAUGAAAAACCCCAAAGAAGAAAUCCGGAGGAUCCGGAUUGUCAAUAUGCUAAAACGCGGAGUAGCCCGUGUAAACCCCUUGGGAGGUUUGAAGAGGUUGCCAGCCGG	.......(((((.((...(((((((.(((..((((((((((...)))))))).))...........((((((......))))))......))).)).)))))......)).)))))....	.................................((((((((...))))))))..............((((((......)))))).(((((.....).))))...................	0.5
95	214	37	-33.7	-1.31	0.11	18.36	GAGUUUCUGGUCAUGAAAAACCCCAAAGAAGAAAUCCGGAGGAUCCGGAUUGUCAAUAUGCUAAAACGCGGAGUAGCCCGUGUAAACCCCUUGGGAGGUUUGAAGAGGUUGCCAGCCGGA	.....((((((..((...((((.(......((((((((((...)))))))).))...........((((((......))))))(((((((...)).)))))...).))))..))))))))	.....((((((..((...((((..........((((((((...))))))))..............((((((......))))))(((((((...)).))))).....))))..))))))))	0.5
96	215	37	-34.2	-1.69	0.05	19.8	AGUUUCUGGUCAUGAAAAACCCCAAAGAAGAAAUCCGGAGGAUCCGGAUUGUCAAUAUGCUAAAACGCGGAGUAGCCCGUGUAAACCCCUUGGGAGGUUUGAAGAGGUUGCCAGCCGGAC	....((((((..((...((((.(......((((((((((...)))))))).))...........((((((......))))))(((((((...)).)))))...).))))..)))))))).	....((((((..((...((((..........((((((((...))))))))..............((((((......))))))(((((((...)).))))).....))))..)))))))).	0.5
97	216	37	-34.2	-1.34	0.1	25.85	GUUUCUGGUCAUGAAAAACCCCAAAGAAGAAAUCCGGAGGAUCCGGAUUGUCAAUAUGCUAAAACGCGGAGUAGCCCGUGUAAACCCCUUGGGAGGUUUGAAGAGGUUGCCAGCCGGACU	...((((((..((...((((.(......((((((((((...)))))))).))...........((((((......))))))(((((((...)).)))))...).))))..))))))))..	...((((((.......((((..........((((((((...))))))))..............((((((......))))))(((((((...)).))))).....))))....))))))..	0.5
98	217	37	-34.2	-1.68	0.07	16.83	UUUCUGGUCAUGAAAAACCCCAAAGAAGAAAUCCGGAGGAUCCGGAUUGUCAAUAUGCUAAAACGCGGAGUAGCCCGUGUAAACCCCUUGGGAGGUUUGAAGAGGUUGCCAGCCGGACUU	..((((((..((...((((.(......((((((((((...)))))))).))...........((((((......))))))(((((((...)).)))))...).))))..))))))))...	..((((((..((...((((..........((((((((...))))))))..............((((((......))))))(((((((...)).))))).....))))..))))))))...	0.49167
99	218	37	-34.2	-1.54	0.05	16.77	UUCUGGUCAUGAAAAACCCCAAAGAAGAAAUCCGGAGGAUCCGGAUUGUCAAUAUGCUAAAACGCGGAGUAGCCCGUGUAAACCCCUUGGGAGGUUUGAAGAGGUUGCCAGCCGGACUUC	.((((((..((...((((.(......((((((((((...)))))))).))...........((((((......))))))(((((((...)).)))))...).))))..))))))))....	.((((((..((...((((..........((((((((...))))))))..............((((((......))))))(((((((...)).))))).....))))..))))))))....	0.5
100	219	37	-34	-1.49	0.06	20.09	UCUGGUCAUGAAAAACCCCAAAGAAGAAAUCCGGAGGAUCCGGAUUGUCAAUAUGCUAAAACGCGGAGUAGCCCGUGUAAACCCCUUGGGAGGUUUGAAGAGGUUGCCAGCCGGACUUCU	((((((..((...((((.(......((((((((((...)))))))).))...........((((((......))))))(((((((...)).)))))...).))))..)))))))).....	((((((..((...((((..........((((((((...))))))))..............((((((......))))))(((((((...)).))))).....))))..)))))))).....	0.5
101	220	37	-33.6	-0.74	0.2	32.4	CUGGUCAUGAAAAACCCCAAAGAAGAAAUCCGGAGGAUCCGGAUUGUCAAUAUGCUAAAACGCGGAGUAGCCCGUGUAAACCCCUUGGGAGGUUUGAAGAGGUUGCCAGCCGGACUUCUG	...........(((((((.(((..((((((((((...)))))))).))...........((((((......))))))......))).)).)))))..(((((((........))))))).	..........................((((((((...))))))))..............((((((......))))))...........................................	0.50833
102	221	37	-33.6	-1.06	0.11	31.62	UGGUCAUGAAAAACCCCAAAGAAGAAAUCCGGAGGAUCCGGAUUGUCAAUAUGCUAAAACGCGGAGUAGCCCGUGUAAACCCCUUGGGAGGUUUGAAGAGGUUGCCAGCCGGACUUCUGC	..........(((((((.(((..((((((((((...)))))))).))...........((((((......))))))......))).)).)))))..(((((((........)))))))..	............((...........((((((((...))))))))..............((((((......))))))..............))....(((((((........)))))))..	0.50833
103	222	37	-33.6	-1.05	0.15	29.91	GGUCAUGAAAAACCCCAAAGAAGAAAUCCGGAGGAUCCGGAUUGUCAAUAUGCUAAAACGCGGAGUAGCCCGUGUAAACCCCUUGGGAGGUUUGAAGAGGUUGCCAGCCGGACUUCUGCU	.........(((((((.(((..((((((((((...)))))))).))...........((((((......))))))......))).)).)))))..(((((((........)))))))...	..........((((..........((((((((...))))))))..............((((((......)))))).............))))...(((((((........)))))))...	0.50833
104	223	37	-33.6	-0.93	0.15	19.47	GUCAUGAAAAACCCCAAAGAAGAAAUCCGGAGGAUCCGGAUUGUCAAUAUGCUAAAACGCGGAGUAGCCCGUGUAAACCCCUUGGGAGGUUUGAAGAGGUUGCCAGCCGGACUUCUGCUG	........(((((((.(((..((((((((((...)))))))).))...........((((((......))))))......))).)).)))))..(((((((........)))))))....	........(((((((..((..(.((((((((...))))))))..)...........((((((......))))))......))..)).)))))..(((((((........)))))))....	0.50833
105	224	37	-33.9	-1.11	0.17	30.85	UCAUGAAAAACCCCAAAGAAGAAAUCCGGAGGAUCCGGAUUGUCAAUAUGCUAAAACGCGGAGUAGCCCGUGUAAACCCCUUGGGAGGUUUGAAGAGGUUGCCAGCCGGACUUCUGCUGG	............(((.(((((.((((((((...)))))))).................(((.((((((..(.((((((((...)).)))))).)..))))))...)))..)))))..)))	......................((((((((...))))))))..............((((((......))))))(((((((...)).)))))..........((((...........))))	0.50833
106	225	37	-37.2	-1.86	0.04	20.82	CAUGAAAAACCCCAAAGAAGAAAUCCGGAGGAUCCGGAUUGUCAAUAUGCUAAAACGCGGAGUAGCCCGUGUAAACCCCUUGGGAGGUUUGAAGAGGUUGCCAGCCGGACUUCUGCUGGG	..........((((.(((((.((((((((...)))))))).................(((.((((((..(.((((((((...)).)))))).)..))))))...)))..)))))..))))	..........((((.(((((.((((((((...))))))))..................((.((((((....((((((((...)).))))))....))))))...))...)))))..))))	0.51667
107	226	37	-37.9	-2.08	0.04	20.1	AUGAAAAACCCCAAAGAAGAAAUCCGGAGGAUCCGGAUUGUCAAUAUGCUAAAACGCGGAGUAGCCCGUGUAAACCCCUUGGGAGGUUUGAAGAGGUUGCCAGCCGGACUUCUGCUGGGU	.........((((.(((((.((((((((...)))))))).................(((.((((((..(.((((((((...)).)))))).)..))))))...)))..)))))..)))).	.........((((.(((((.((((((((...))))))))..................((.((((((....((((((((...)).))))))....))))))...))...)))))..)))).	0.50833
108	227	37	-38.1	-1.96	0.04	19.79	UGAAAAACCCCAAAGAAGAAAUCCGGAGGAUCCGGAUUGUCAAUAUGCUAAAACGCGGAGUAGCCCGUGUAAACCCCUUGGGAGGUUUGAAGAGGUUGCCAGCCGGACUUCUGCUGGGUC	......((((...(((((.((((((((...)))))))).................(((.((((((..(.((((((((...)).)))))).)..))))))...)))..)))))...)))).	......((((...(((((.((((((((...))))))))..................((.((((((....((((((((...)).))))))....))))))...))...)))))...)))).	0.51667
109	228	37	-38.1	-2.12	0.03	20.05	GAAAAACCCCAAAGAAGAAAUCCGGAGGAUCCGGAUUGUCAAUAUGCUAAAACGCGGAGUAGCCCGUGUAAACCCCUUGGGAGGUUUGAAGAGGUUGCCAGCCGGACUUCUGCUGGGUCA	.....((((...(((((.((((((((...)))))))).................(((.((((((..(.((((((((...)).)))))).)..))))))...)))..)))))...))))..	......(((...(((((.((((((((...))))))))..................((.((((((....((((((((...)).))))))....))))))...))...)))))...)))...	0.51667
110	229	37	-38.1	-2.73	0.01	19.82	AAAAACCCCAAAGAAGAAAUCCGGAGGAUCCGGAUUGUCAAUAUGCUAAAACGCGGAGUAGCCCGUGUAAACCCCUUGGGAGGUUUGAAGAGGUUGCCAGCCGGACUUCUGCUGGGUCAU	....((((...(((((.((((((((...)))))))).................(((.((((((..(.((((((((...)).)))))).)..))))))...)))..)))))...))))...	....((((...(((((.((((((((...))))))))..................((.((((((....((((((((...)).))))))....))))))...))...)))))...))))...	0.50833
111	230	37	-38.1	-1.97	0.02	19.85	AAAACCCCAAAGAAGAAAUCCGGAGGAUCCGGAUUGUCAAUAUGCUAAAACGCGGAGUAGCCCGUGUAAACCCCUUGGGAGGUUUGAAGAGGUUGCCAGCCGGACUUCUGCUGGGUCAUG	...((((...(((((.((((((((...)))))))).................(((.((((((..(.((((((((...)).)))))).)..))))))...)))..)))))...))))....	...((((...(((((.((((((((...))))))))..................((.((((((....((((((((...)).))))))....))))))...))...)))))...))))....	0.51667
112	231	37	-38.1	-1.51	0.04	20.08	AAACCCCAAAGAAGAAAUCCGGAGGAUCCGGAUUGUCAAUAUGCUAAAACGCGGAGUAGCCCGUGUAAACCCCUUGGGAGGUUUGAAGAGGUUGCCAGCCGGACUUCUGCUGGGUCAUGG	..((((...(((((.((((((((...)))))))).................(((.((((((..(.((((((((...)).)))))).)..))))))...)))..)))))...)))).....	..((((...(((((.((((((((...))))))))..................((.((((((....((((((((...)).))))))....))))))...))...)))))...)))).....	0.525
113	232	37	-38.1	-1.39	0.08	21.51	AACCCCAAAGAAGAAAUCCGGAGGAUCCGGAUUGUCAAUAUGCUAAAACGCGGAGUAGCCCGUGUAAACCCCUUGGGAGGUUUGAAGAGGUUGCCAGCCGGACUUCUGCUGGGUCAUGGA	.((((...(((((.((((((((...)))))))).................(((.((((((..(.((((((((...)).)))))).)..))))))...)))..)))))...))))......	.((((...(((((.((((((((...))))))))..................((.((((((....((((((((...)).))))))....))))))...))...)))))...))))......	0.525
114	233	37	-37.9	-1.1	0.15	22.5	ACCCCAAAGAAGAAAUCCGGAGGAUCCGGAUUGUCAAUAUGCUAAAACGCGGAGUAGCCCGUGUAAACCCCUUGGGAGGUUUGAAGAGGUUGCCAGCCGGACUUCUGCUGGGUCAUGGAC	..((((.(((((.((((((((...)))))))).................(((.((((((..(.((((((((...)).)))))).)..))))))...)))..)))))..))))........	..((((.(((((.((((((((...))))))))..................((.((((((....((((((((...)).))))))....))))))...))...)))))..))))........	0.53333
115	234	37	-37.9	-1.05	0.14	22.91	CCCCAAAGAAGAAAUCCGGAGGAUCCGGAUUGUCAAUAUGCUAAAACGCGGAGUAGCCCGUGUAAACCCCUUGGGAGGUUUGAAGAGGUUGCCAGCCGGACUUCUGCUGGGUCAUGGACC	.((((.(((((.((((((((...)))))))).................(((.((((((..(.((((((((...)).)))))).)..))))))...)))..)))))..)))).........	.((((.(((((.((((((((...))))))))..................((.((((((....((((((((...)).))))))....))))))...))...)))))..)))).........	0.54167
116	235	37	-37.6	-0.96	0.18	34.56	CCCAAAGAAGAAAUCCGGAGGAUCCGGAUUGUCAAUAUGCUAAAACGCGGAGUAGCCCGUGUAAACCCCUUGGGAGGUUUGAAGAGGUUGCCAGCCGGACUUCUGCUGGGUCAUGGACCC	...............((((((.(((((.(((.((((........((((((......))))))(((((((...)).)))))......)))).))))))))))))))..(((((...)))))	...........((((((((...)))))))).....................((((((....((((((((...)).))))))....))))))................(((((...)))))	0.54167
117	236	37	-39.3	-1.66	0.05	29.4	CCAAAGAAGAAAUCCGGAGGAUCCGGAUUGUCAAUAUGCUAAAACGCGGAGUAGCCCGUGUAAACCCCUUGGGAGGUUUGAAGAGGUUGCCAGCCGGACUUCUGCUGGGUCAUGGACCCA	..............((((((.(((((.(((.((((........((((((......))))))(((((((...)).)))))......)))).)))))))))))))).((((((...))))))	..........((((((((...)))))))).....................((((((....((((((((...)).))))))....))))))...............((((((...))))))	0.53333
118	237	37	-40	-1.88	0.04	28.7	CAAAGAAGAAAUCCGGAGGAUCCGGAUUGUCAAUAUGCUAAAACGCGGAGUAGCCCGUGUAAACCCCUUGGGAGGUUUGAAGAGGUUGCCAGCCGGACUUCUGCUGGGUCAUGGACCCAU	.............((((((.(((((.(((.((((........((((((......))))))(((((((...)).)))))......)))).)))))))))))))).((((((...)))))).	.........((((((((...)))))))).....................((((((....((((((((...)).))))))....))))))...............((((((...)))))).	0.525
119	238	37	-40	-1.97	0.03	28.56	AAAGAAGAAAUCCGGAGGAUCCGGAUUGUCAAUAUGCUAAAACGCGGAGUAGCCCGUGUAAACCCCUUGGGAGGUUUGAAGAGGUUGCCAGCCGGACUUCUGCUGGGUCAUGGACCCAUC	............((((((.(((((.(((.((((........((((((......))))))(((((((...)).)))))......)))).)))))))))))))).((((((...))))))..	........((((((((...)))))))).....................((((((....((((((((...)).))))))....))))))...............((((((...))))))..	0.525
120	239	37	-40	-2.38	0.01	27.43	AAGAAGAAAUCCGGAGGAUCCGGAUUGUCAAUAUGCUAAAACGCGGAGUAGCCCGUGUAAACCCCUUGGGAGGUUUGAAGAGGUUGCCAGCCGGACUUCUGCUGGGUCAUGGACCCAUCA	...........((((((.(((((.(((.((((........((((((......))))))(((((((...)).)))))......)))).)))))))))))))).((((((...))))))...	.......((((((((...))))))))...............(((((......))))).(((((((...)).)))))..........................((((((...))))))...	0.525
121	240	37	-40.2	-2.08	0.02	25.58	AGAAGAAAUCCGGAGGAUCCGGAUUGUCAAUAUGCUAAAACGCGGAGUAGCCCGUGUAAACCCCUUGGGAGGUUUGAAGAGGUUGCCAGCCGGACUUCUGCUGGGUCAUGGACCCAUCAG	....((((((((((...)))))))).))..............(((.((((((..(.((((((((...)).)))))).)..))))))...))).....(((.((((((...)))))).)))	......((((((((...)))))))).....................((((((....((((((((...)).))))))....))))))...............((((((...))))))....	0.53333
122	241	37	-42.2	-2.45	0	12.07	GAAGAAAUCCGGAGGAUCCGGAUUGUCAAUAUGCUAAAACGCGGAGUAGCCCGUGUAAACCCCUUGGGAGGUUUGAAGAGGUUGCCAGCCGGACUUCUGCUGGGUCAUGGACCCAUCAGA	...((((((((((...)))))))).))..............(((.((((((..(.((((((((...)).)))))).)..))))))...)))....((((.((((((...)))))).))))	.....((((((((...)))))))).................(((.((((((....((((((((...)).))))))....))))))...)))....((((.((((((...)))))).))))	0.53333
123	242	37	-43	-2.79	0.01	10.01	AAGAAAUCCGGAGGAUCCGGAUUGUCAAUAUGCUAAAACGCGGAGUAGCCCGUGUAAACCCCUUGGGAGGUUUGAAGAGGUUGCCAGCCGGACUUCUGCUGGGUCAUGGACCCAUCAGAA	..((((((((((...)))))))).))..............(((.((((((..(.((((((((...)).)))))).)..))))))...)))....((((.((((((...)))))).)))).	..(.((((((((...))))))))..)..............(((.((((((....((((((((...)).))))))....))))))...)))....((((.((((((...)))))).)))).	0.525
124	243	37	-43.7	-3.14	0	9.64	AGAAAUCCGGAGGAUCCGGAUUGUCAAUAUGCUAAAACGCGGAGUAGCCCGUGUAAACCCCUUGGGAGGUUUGAAGAGGUUGCCAGCCGGACUUCUGCUGGGUCAUGGACCCAUCAGAAU	.((((((((((...)))))))).))..............(((.((((((..(.((((((((...)).)))))).)..))))))...)))...(((((.((((((...)))))).))))).	.(.((((((((...))))))))..)..............(((.((((((....((((((((...)).))))))....))))))...)))...(((((.((((((...)))))).))))).	0.525
125	244	37	-43.9	-2.88	0	9.23	GAAAUCCGGAGGAUCCGGAUUGUCAAUAUGCUAAAACGCGGAGUAGCCCGUGUAAACCCCUUGGGAGGUUUGAAGAGGUUGCCAGCCGGACUUCUGCUGGGUCAUGGACCCAUCAGAAUG	((((((((((...)))))))).))..............(((.((((((..(.((((((((...)).)))))).)..))))))...)))...(((((.((((((...)))))).)))))..	((((((((((...)))))))).))..............(((.((((((....((((((((...)).))))))....))))))...)))...(((((.((((((...)))))).)))))..	0.53333
126	245	37	-43.3	-2.52	0.01	10.83	AAAUCCGGAGGAUCCGGAUUGUCAAUAUGCUAAAACGCGGAGUAGCCCGUGUAAACCCCUUGGGAGGUUUGAAGAGGUUGCCAGCCGGACUUCUGCUGGGUCAUGGACCCAUCAGAAUGG	.((((((((...)))))))).................(((.((((((..(.((((((((...)).)))))).)..))))))...)))...(((((.((((((...)))))).)))))...	.((((((((...)))))))).................(((.((((((....((((((((...)).))))))....))))))...)))...(((((.((((((...)))))).)))))...	0.53333
127	246	37	-42.9	-2.15	0.01	13.67	AAUCCGGAGGAUCCGGAUUGUCAAUAUGCUAAAACGCGGAGUAGCCCGUGUAAACCCCUUGGGAGGUUUGAAGAGGUUGCCAGCCGGACUUCUGCUGGGUCAUGGACCCAUCAGAAUGGU	((((((((...)))))))).................(((.((((((..(.((((((((...)).)))))).)..))))))...)))...(((((.((((((...)))))).)))))....	((((((((...)))))))).....................((((((....((((((((...)).))))))....)))))).........(((((.((((((...)))))).)))))....	0.53333
128	247	37	-41.9	-1.95	0.03	15.17	AUCCGGAGGAUCCGGAUUGUCAAUAUGCUAAAACGCGGAGUAGCCCGUGUAAACCCCUUGGGAGGUUUGAAGAGGUUGCCAGCCGGACUUCUGCUGGGUCAUGGACCCAUCAGAAUGGUU	(((((((...)))))))..................(((.((((((..(.((((((((...)).)))))).)..))))))...)))((((((((.((((((...)))))).))))..))))	(((((((...)))))))......................((((((....((((((((...)).))))))....)))))).........(((((.((((((...)))))).))))).....	0.53333
129	248	37	-41.6	-1.8	0.04	16.28	UCCGGAGGAUCCGGAUUGUCAAUAUGCUAAAACGCGGAGUAGCCCGUGUAAACCCCUUGGGAGGUUUGAAGAGGUUGCCAGCCGGACUUCUGCUGGGUCAUGGACCCAUCAGAAUGGUUU	((((((...))))))...................(((.((((((..(.((((((((...)).)))))).)..))))))...)))((((((((.((((((...)))))).))))..)))).	((((((...)))))).......................((((((....((((((((...)).))))))....)))))).........(((((.((((((...)))))).)))))......	0.53333
130	249	37	-40.2	-1.45	0.07	22.82	CCGGAGGAUCCGGAUUGUCAAUAUGCUAAAACGCGGAGUAGCCCGUGUAAACCCCUUGGGAGGUUUGAAGAGGUUGCCAGCCGGACUUCUGCUGGGUCAUGGACCCAUCAGAAUGGUUUU	(((((...)))))....................(((.((((((..(.((((((((...)).)))))).)..))))))...)))((((((((.((((((...)))))).))))..))))..	(((((...)))))........................((((((....((((((((...)).))))))....)))))).........(((((.((((((...)))))).))))).......	0.53333
131	250	37	-39.7	-1.3	0.11	20.12	CGGAGGAUCCGGAUUGUCAAUAUGCUAAAACGCGGAGUAGCCCGUGUAAACCCCUUGGGAGGUUUGAAGAGGUUGCCAGCCGGACUUCUGCUGGGUCAUGGACCCAUCAGAAUGGUUUUG	((((((.(((((.(((.((((........((((((......))))))(((((((...)).)))))......)))).)))))))))))))).((((((...))))))..............	((((((.(((((.(((.((((........((((((......))))))(((((((...)).)))))......)))).)))))))))))))).((((((...))))))..............	0.53333
132	251	37	-38.7	-0.76	0.21	22.68	GGAGGAUCCGGAUUGUCAAUAUGCUAAAACGCGGAGUAGCCCGUGUAAACCCCUUGGGAGGUUUGAAGAGGUUGCCAGCCGGACUUCUGCUGGGUCAUGGACCCAUCAGAAUGGUUUUGG	......(((((.(((.((((........((((((......))))))(((((((...)).)))))......)))).)))))))).(((((.((((((...)))))).))))).........	...((.(((((.(((.((((........((((((......))))))(((((((...)).)))))......)))).))))))))))..((.((((((...)))))).))............	0.53333
133	252	37	-41	-1.48	0.07	15.15	GAGGAUCCGGAUUGUCAAUAUGCUAAAACGCGGAGUAGCCCGUGUAAACCCCUUGGGAGGUUUGAAGAGGUUGCCAGCCGGACUUCUGCUGGGUCAUGGACCCAUCAGAAUGGUUUUGGC	((.(((....))).)).....((((((((.(((.((((((..(.((((((((...)).)))))).)..))))))...)))...(((((.((((((...)))))).)))))..))))))))	((.(((....))).)).....((((((((.(((.((((((....((((((((...)).))))))....))))))...)))...(((((.((((((...)))))).)))))..))))))))	0.53333
134	253	37	-40.7	-1.43	0.1	19.83	AGGAUCCGGAUUGUCAAUAUGCUAAAACGCGGAGUAGCCCGUGUAAACCCCUUGGGAGGUUUGAAGAGGUUGCCAGCCGGACUUCUGCUGGGUCAUGGACCCAUCAGAAUGGUUUUGGCG	....................((((((((.(((.((((((..(.((((((((...)).)))))).)..))))))...)))...(((((.((((((...)))))).)))))..)))))))).	....................((((((((.....((((((....((((((((...)).))))))....)))))).........(((((.((((((...)))))).)))))..)))))))).	0.53333
135	254	37	-40.7	-1.53	0.07	20.38	GGAUCCGGAUUGUCAAUAUGCUAAAACGCGGAGUAGCCCGUGUAAACCCCUUGGGAGGUUUGAAGAGGUUGCCAGCCGGACUUCUGCUGGGUCAUGGACCCAUCAGAAUGGUUUUGGCGA	...................((((((((.(((.((((((..(.((((((((...)).)))))).)..))))))...)))...(((((.((((((...)))))).)))))..))))))))..	...................((((((((.....((((((....((((((((...)).))))))....)))))).........(((((.((((((...)))))).)))))..))))))))..	0.53333
136	255	37	-40.7	-1.5	0.08	22.85	GAUCCGGAUUGUCAAUAUGCUAAAACGCGGAGUAGCCCGUGUAAACCCCUUGGGAGGUUUGAAGAGGUUGCCAGCCGGACUUCUGCUGGGUCAUGGACCCAUCAGAAUGGUUUUGGCGAU	..................((((((((.(((.((((((..(.((((((((...)).)))))).)..))))))...)))...(((((.((((((...)))))).)))))..))))))))...	..................(((..........((((((....((((((((...)).))))))....)))))).........(((((.((((((...)))))).))))).......)))...	0.525
137	256	37	-40.7	-1.84	0.04	25.5	AUCCGGAUUGUCAAUAUGCUAAAACGCGGAGUAGCCCGUGUAAACCCCUUGGGAGGUUUGAAGAGGUUGCCAGCCGGACUUCUGCUGGGUCAUGGACCCAUCAGAAUGGUUUUGGCGAUA	.................((((((((.(((.((((((..(.((((((((...)).)))))).)..))))))...)))...(((((.((((((...)))))).)))))..))))))))....	..............................((((((....((((((((...)).))))))....)))))).........(((((.((((((...)))))).)))))..............	0.51667
138	257	37	-40.7	-1.75	0.03	25.55	UCCGGAUUGUCAAUAUGCUAAAACGCGGAGUAGCCCGUGUAAACCCCUUGGGAGGUUUGAAGAGGUUGCCAGCCGGACUUCUGCUGGGUCAUGGACCCAUCAGAAUGGUUUUGGCGAUAC	................((((((((.(((.((((((..(.((((((((...)).)))))).)..))))))...)))...(((((.((((((...)))))).)))))..)))))))).....	.............................((((((....((((((((...)).))))))....)))))).........(((((.((((((...)))))).)))))...............	0.525
139	258	37	-40.7	-1.61	0.05	26.17	CCGGAUUGUCAAUAUGCUAAAACGCGGAGUAGCCCGUGUAAACCCCUUGGGAGGUUUGAAGAGGUUGCCAGCCGGACUUCUGCUGGGUCAUGGACCCAUCAGAAUGGUUUUGGCGAUACU	...............((((((((.(((.((((((..(.((((((((...)).)))))).)..))))))...)))...(((((.((((((...)))))).)))))..))))))))......	.........................((.((((((....((((((((...)).))))))....))))))...))....(((((.((((((...)))))).)))))................	0.525
140	259	37	-40.7	-1.94	0.05	27.39	CGGAUUGUCAAUAUGCUAAAACGCGGAGUAGCCCGUGUAAACCCCUUGGGAGGUUUGAAGAGGUUGCCAGCCGGACUUCUGCUGGGUCAUGGACCCAUCAGAAUGGUUUUGGCGAUACUA	..............((((((((.(((.((((((..(.((((((((...)).)))))).)..))))))...)))...(((((.((((((...)))))).)))))..)))))))).......	...........................((((((....((((((((...)).))))))....)))))).........(((((.((((((...)))))).))))).................	0.51667
141	260	37	-40.7	-1.69	0.04	27.1	GGAUUGUCAAUAUGCUAAAACGCGGAGUAGCCCGUGUAAACCCCUUGGGAGGUUUGAAGAGGUUGCCAGCCGGACUUCUGCUGGGUCAUGGACCCAUCAGAAUGGUUUUGGCGAUACUAG	.............((((((((.(((.((((((..(.((((((((...)).)))))).)..))))))...)))...(((((.((((((...)))))).)))))..))))))))........	..........................((((((....((((((((...)).))))))....)))))).........(((((.((((((...)))))).)))))..................	0.51667
142	261	37	-41.9	-2.39	0.02	26.15	GAUUGUCAAUAUGCUAAAACGCGGAGUAGCCCGUGUAAACCCCUUGGGAGGUUUGAAGAGGUUGCCAGCCGGACUUCUGCUGGGUCAUGGACCCAUCAGAAUGGUUUUGGCGAUACUAGC	............((((..((((((......))))))(((((((...)).)))))......(((((((((((...(((((.((((((...)))))).)))))))))..)))))))..))))	...................(((((......))))).(((((((...)).)))))......((((((.((((...(((((.((((((...)))))).)))))))))...))))))......	0.51667
143	262	37	-42.7	-2.02	0.02	18.09	AUUGUCAAUAUGCUAAAACGCGGAGUAGCCCGUGUAAACCCCUUGGGAGGUUUGAAGAGGUUGCCAGCCGGACUUCUGCUGGGUCAUGGACCCAUCAGAAUGGUUUUGGCGAUACUAGCC	...........((((..((((((......))))))(((((((...)).)))))......(((((((((((...(((((.((((((...)))))).)))))))))..)))))))..)))).	...........((((..((((((......))))))(((((((...)).)))))......(((((((((((...(((((.((((((...)))))).)))))))))..)))))))..)))).	0.51667
144	263	37	-42.7	-2.06	0.01	19.27	UUGUCAAUAUGCUAAAACGCGGAGUAGCCCGUGUAAACCCCUUGGGAGGUUUGAAGAGGUUGCCAGCCGGACUUCUGCUGGGUCAUGGACCCAUCAGAAUGGUUUUGGCGAUACUAGCCU	..........((((..((((((......))))))(((((((...)).)))))......(((((((((((...(((((.((((((...)))))).)))))))))..)))))))..))))..	..........((((..((((((......))))))(((((((...)).)))))......(((((((((((...(((((.((((((...)))))).)))))))))..)))))))..))))..	0.51667
145	264	37	-42.7	-2.38	0.01	22.06	UGUCAAUAUGCUAAAACGCGGAGUAGCCCGUGUAAACCCCUUGGGAGGUUUGAAGAGGUUGCCAGCCGGACUUCUGCUGGGUCAUGGACCCAUCAGAAUGGUUUUGGCGAUACUAGCCUU	.........((((..((((((......))))))(((((((...)).)))))......(((((((((((...(((((.((((((...)))))).)))))))))..)))))))..))))...	.........(((...((((((......))))))(((((((...)).)))))......(((((((((((...(((((.((((((...)))))).)))))))))..)))))))...)))...	0.51667
146	265	37	-42.7	-2.52	0.02	24.42	GUCAAUAUGCUAAAACGCGGAGUAGCCCGUGUAAACCCCUUGGGAGGUUUGAAGAGGUUGCCAGCCGGACUUCUGCUGGGUCAUGGACCCAUCAGAAUGGUUUUGGCGAUACUAGCCUUU	........((((..((((((......))))))(((((((...)).)))))......(((((((((((...(((((.((((((...)))))).)))))))))..)))))))..))))....	..............((((((......))))))(((((((...)).)))))......(((((((((((...(((((.((((((...)))))).)))))))))..)))))))..........	0.51667
147	266	37	-42.7	-2.52	0.01	21.78	UCAAUAUGCUAAAACGCGGAGUAGCCCGUGUAAACCCCUUGGGAGGUUUGAAGAGGUUGCCAGCCGGACUUCUGCUGGGUCAUGGACCCAUCAGAAUGGUUUUGGCGAUACUAGCCUUUU	.......((((..((((((......))))))(((((((...)).)))))......(((((((((((...(((((.((((((...)))))).)))))))))..)))))))..)))).....	.............((((((......))))))(((((((...)).)))))..(((((((....(((...((((((.((((((...)))))).)))))..)....)))......))))))).	0.50833
148	267	37	-43.4	-2.49	0.03	15.85	CAAUAUGCUAAAACGCGGAGUAGCCCGUGUAAACCCCUUGGGAGGUUUGAAGAGGUUGCCAGCCGGACUUCUGCUGGGUCAUGGACCCAUCAGAAUGGUUUUGGCGAUACUAGCCUUUUU	............((((((......))))))(((((((...)).)))))((((((((((...((((((((((((.((((((...)))))).))))..)).)))))).....))))))))))	............((((((......))))))(((((((...)).)))))((((((((((...((((..(.((((.((((((...)))))).))))...)...)))).....))))))))))	0.50833
149	268	37	-44	-2.39	0.02	13.65	AAUAUGCUAAAACGCGGAGUAGCCCGUGUAAACCCCUUGGGAGGUUUGAAGAGGUUGCCAGCCGGACUUCUGCUGGGUCAUGGACCCAUCAGAAUGGUUUUGGCGAUACUAGCCUUUUUG	...........((((((......))))))(((((((...)).)))))((((((((((...((((((((((((.((((((...)))))).))))..)).)))))).....)))))))))).	...........((((((......))))))(((((((...)).)))))((((((((((...((((.((.((((.((((((...)))))).))))...))..)))).....)))))))))).	0.50833
150	269	37	-44	-2.71	0.02	14.2	AUAUGCUAAAACGCGGAGUAGCCCGUGUAAACCCCUUGGGAGGUUUGAAGAGGUUGCCAGCCGGACUUCUGCUGGGUCAUGGACCCAUCAGAAUGGUUUUGGCGAUACUAGCCUUUUUGA	..........((((((......))))))(((((((...)).)))))((((((((((...((((((((((((.((((((...)))))).))))..)).)))))).....))))))))))..	..........((((((......))))))(((((((...)).)))))((((((((((...((((.((.((((.((((((...)))))).))))...))..)))).....))))))))))..	0.50833
151	270	37	-44	-2.29	0.02	15.74	UAUGCUAAAACGCGGAGUAGCCCGUGUAAACCCCUUGGGAGGUUUGAAGAGGUUGCCAGCCGGACUUCUGCUGGGUCAUGGACCCAUCAGAAUGGUUUUGGCGAUACUAGCCUUUUUGAG	.........((((((......))))))(((((((...)).)))))((((((((((...((((((((((((.((((((...)))))).))))..)).)))))).....))))))))))...	.........((((((......))))))(((((((...)).)))))((((((((((...((((.((.((((.((((((...)))))).))))...))..)))).....))))))))))...	0.51667
152	271	37	-44	-2.43	0	18.19	AUGCUAAAACGCGGAGUAGCCCGUGUAAACCCCUUGGGAGGUUUGAAGAGGUUGCCAGCCGGACUUCUGCUGGGUCAUGGACCCAUCAGAAUGGUUUUGGCGAUACUAGCCUUUUUGAGA	........((((((......))))))(((((((...)).)))))((((((((((...((((((((((((.((((((...)))))).))))..)).)))))).....))))))))))....	........((((((......)))))).((((((...)).)))).((((((((((...((((.((.((((.((((((...)))))).))))...))..)))).....))))))))))....	0.51667
153	272	37	-44	-2.65	0	18.41	UGCUAAAACGCGGAGUAGCCCGUGUAAACCCCUUGGGAGGUUUGAAGAGGUUGCCAGCCGGACUUCUGCUGGGUCAUGGACCCAUCAGAAUGGUUUUGGCGAUACUAGCCUUUUUGAGAU	.......((((((......))))))(((((((...)).)))))((((((((((...((((((((((((.((((((...)))))).))))..)).)))))).....)))))))))).....	.......((((((......)))))).((((((...)).)))).((((((((((...((((.((.((((.((((((...)))))).))))...))..)))).....)))))))))).....	0.51667
154	273	37	-44	-2.43	0.01	18.78	GCUAAAACGCGGAGUAGCCCGUGUAAACCCCUUGGGAGGUUUGAAGAGGUUGCCAGCCGGACUUCUGCUGGGUCAUGGACCCAUCAGAAUGGUUUUGGCGAUACUAGCCUUUUUGAGAUU	......((((((......))))))(((((((...)).)))))((((((((((...((((((((((((.((((((...)))))).))))..)).)))))).....))))))))))......	......((((((......)))))).((((((...)).)))).((((((((((...((((.((.((((.((((((...)))))).))))...))..)))).....))))))))))......	0.51667
155	274	37	-44	-2.92	0.01	19.22	CUAAAACGCGGAGUAGCCCGUGUAAACCCCUUGGGAGGUUUGAAGAGGUUGCCAGCCGGACUUCUGCUGGGUCAUGGACCCAUCAGAAUGGUUUUGGCGAUACUAGCCUUUUUGAGAUUU	.....((((((......))))))(((((((...)).)))))((((((((((...((((((((((((.((((((...)))))).))))..)).)))))).....)))))))))).......	.....((((((......)))))).((((((...)).)))).((((((((((...((((.((.((((.((((((...)))))).))))...))..)))).....)))))))))).......	0.50833
156	275	37	-44	-2.81	0	20.49	UAAAACGCGGAGUAGCCCGUGUAAACCCCUUGGGAGGUUUGAAGAGGUUGCCAGCCGGACUUCUGCUGGGUCAUGGACCCAUCAGAAUGGUUUUGGCGAUACUAGCCUUUUUGAGAUUUA	....((((((......))))))(((((((...)).)))))((((((((((...((((((((((((.((((((...)))))).))))..)).)))))).....))))))))))........	....((((((......))))))..(((((...)).)))..((((((((((...((((.((.((((.((((((...)))))).))))...))..)))).....))))))))))........	0.5
157	276	37	-44	-2.78	0	20.48	AAAACGCGGAGUAGCCCGUGUAAACCCCUUGGGAGGUUUGAAGAGGUUGCCAGCCGGACUUCUGCUGGGUCAUGGACCCAUCAGAAUGGUUUUGGCGAUACUAGCCUUUUUGAGAUUUAC	...((((((......))))))(((((((...)).)))))((((((((((...((((((((((((.((((((...)))))).))))..)).)))))).....)))))))))).........	...((((((......))))))..(((((...)).)))..((((((((((...((((.((.((((.((((((...)))))).))))...))..)))).....)))))))))).........	0.50833
158	277	37	-44	-2.65	0	20.91	AAACGCGGAGUAGCCCGUGUAAACCCCUUGGGAGGUUUGAAGAGGUUGCCAGCCGGACUUCUGCUGGGUCAUGGACCCAUCAGAAUGGUUUUGGCGAUACUAGCCUUUUUGAGAUUUACA	..((((((......))))))(((((((...)).)))))((((((((((...((((((((((((.((((((...)))))).))))..)).)))))).....))))))))))..........	..((((((......))))))..(((((...)).)))..((((((((((...((((.((.((((.((((((...)))))).))))...))..)))).....))))))))))..........	0.50833
159	278	37	-44	-2.58	0	21.25	AACGCGGAGUAGCCCGUGUAAACCCCUUGGGAGGUUUGAAGAGGUUGCCAGCCGGACUUCUGCUGGGUCAUGGACCCAUCAGAAUGGUUUUGGCGAUACUAGCCUUUUUGAGAUUUACAG	.((((((......))))))(((((((...)).)))))((((((((((...((((((((((((.((((((...)))))).))))..)).)))))).....))))))))))...........	.((((((......))))))..(((((...)).)))..((((((((((...((((.((.((((.((((((...)))))).))))...))..)))).....))))))))))...........	0.51667
160	279	37	-43.7	-2.24	0.01	21.68	ACGCGGAGUAGCCCGUGUAAACCCCUUGGGAGGUUUGAAGAGGUUGCCAGCCGGACUUCUGCUGGGUCAUGGACCCAUCAGAAUGGUUUUGGCGAUACUAGCCUUUUUGAGAUUUACAGC	((((((......))))))(((((((...)).)))))((((((((((...((((((((((((.((((((...)))))).))))..)).)))))).....))))))))))............	((((((......))))))..(((((...)).)))..((((((((((...((((.((.((((.((((((...)))))).))))...))..)))).....))))))))))............	0.525
161	280	37	-41.9	-1.91	0.03	26.71	CGCGGAGUAGCCCGUGUAAACCCCUUGGGAGGUUUGAAGAGGUUGCCAGCCGGACUUCUGCUGGGUCAUGGACCCAUCAGAAUGGUUUUGGCGAUACUAGCCUUUUUGAGAUUUACAGCA	(((((......))))).(((((((...)).)))))((((((((((...((((((((((((.((((((...)))))).))))..)).)))))).....)))))))))).............	(((((......)))))...(((((...)).)))..(((((((((....(((...(.((((.((((((...)))))).))))...)....)))......))))))))).............	0.525
162	281	37	-40.7	-1.95	0.06	31.15	GCGGAGUAGCCCGUGUAAACCCCUUGGGAGGUUUGAAGAGGUUGCCAGCCGGACUUCUGCUGGGUCAUGGACCCAUCAGAAUGGUUUUGGCGAUACUAGCCUUUUUGAGAUUUACAGCAA	((((......))))(((((.(.(..((((((((...((..(((((((((((...(((((.((((((...)))))).)))))))))..))))))).)))))))))).).).))))).....	((((......))))(((((.........(((((.......(((((((((((...(((((.((((((...)))))).)))))))))..)))))))...)))))........))))).....	0.51667
163	282	37	-39.5	-1.59	0.07	27.36	CGGAGUAGCCCGUGUAAACCCCUUGGGAGGUUUGAAGAGGUUGCCAGCCGGACUUCUGCUGGGUCAUGGACCCAUCAGAAUGGUUUUGGCGAUACUAGCCUUUUUGAGAUUUACAGCAAU	(((......)))((((((.(.(..((((((((...((..(((((((((((...(((((.((((((...)))))).)))))))))..))))))).)))))))))).).).)))))).....	(((......)))((((((........((((((.......(((((((((((...(((((.((((((...)))))).)))))))))..)))))))...)))))).......)))))).....	0.50833
164	283	37	-38.2	-1.4	0.1	29.77	GGAGUAGCCCGUGUAAACCCCUUGGGAGGUUUGAAGAGGUUGCCAGCCGGACUUCUGCUGGGUCAUGGACCCAUCAGAAUGGUUUUGGCGAUACUAGCCUUUUUGAGAUUUACAGCAAUC	((......)).((((((.(.(..((((((((...((..(((((((((((...(((((.((((((...)))))).)))))))))..))))))).)))))))))).).).))))))......	((......)).((((((........((((((.......(((((((((((...(((((.((((((...)))))).)))))))))..)))))))...)))))).......))))))......	0.50833
165	284	37	-38.4	-1.36	0.13	30.18	GAGUAGCCCGUGUAAACCCCUUGGGAGGUUUGAAGAGGUUGCCAGCCGGACUUCUGCUGGGUCAUGGACCCAUCAGAAUGGUUUUGGCGAUACUAGCCUUUUUGAGAUUUACAGCAAUCA	((...((...((((((.(.(..((((((((...((..(((((((((((...(((((.((((((...)))))).)))))))))..))))))).)))))))))).).).))))))))..)).	.....((...((((((........((((((.......(((((((((((...(((((.((((((...)))))).)))))))))..)))))))...)))))).......)))))))).....	0.5
166	285	37	-38	-1.89	0.03	32.13	AGUAGCCCGUGUAAACCCCUUGGGAGGUUUGAAGAGGUUGCCAGCCGGACUUCUGCUGGGUCAUGGACCCAUCAGAAUGGUUUUGGCGAUACUAGCCUUUUUGAGAUUUACAGCAAUCAA	....((...((((((.(.(..((((((((...((..(((((((((((...(((((.((((((...)))))).)))))))))..))))))).)))))))))).).).))))))))......	....((...((((((.........(((((.......(((((((((((...(((((.((((((...)))))).)))))))))..)))))))...)))))........))))))))......	0.49167
167	286	37	-38	-1.42	0.09	32.86	GUAGCCCGUGUAAACCCCUUGGGAGGUUUGAAGAGGUUGCCAGCCGGACUUCUGCUGGGUCAUGGACCCAUCAGAAUGGUUUUGGCGAUACUAGCCUUUUUGAGAUUUACAGCAAUCAAG	...((...((((((.(.(..((((((((...((..(((((((((((...(((((.((((((...)))))).)))))))))..))))))).)))))))))).).).)))))))).......	...((...((((((.........(((((.......(((((((((((...(((((.((((((...)))))).)))))))))..)))))))...)))))........)))))))).......	0.5
168	287	37	-38	-1.63	0.07	30.79	UAGCCCGUGUAAACCCCUUGGGAGGUUUGAAGAGGUUGCCAGCCGGACUUCUGCUGGGUCAUGGACCCAUCAGAAUGGUUUUGGCGAUACUAGCCUUUUUGAGAUUUACAGCAAUCAAGC	..((...((((((.(.(..((((((((...((..(((((((((((...(((((.((((((...)))))).)))))))))..))))))).)))))))))).).).))))))))........	.......((((((........((((((.......(((((((((((...(((((.((((((...)))))).)))))))))..)))))))...)))))).......))))))..........	0.5
169	288	37	-38	-1.41	0.09	35.36	AGCCCGUGUAAACCCCUUGGGAGGUUUGAAGAGGUUGCCAGCCGGACUUCUGCUGGGUCAUGGACCCAUCAGAAUGGUUUUGGCGAUACUAGCCUUUUUGAGAUUUACAGCAAUCAAGCC	.((...((((((.(.(..((((((((...((..(((((((((((...(((((.((((((...)))))).)))))))))..))))))).)))))))))).).).)))))))).........	......((((((..........(((........(((((((((((...(((((.((((((...)))))).)))))))))..)))))))....))).........))))))...........	0.50833
170	289	37	-38.7	-1.52	0.08	33.85	GCCCGUGUAAACCCCUUGGGAGGUUUGAAGAGGUUGCCAGCCGGACUUCUGCUGGGUCAUGGACCCAUCAGAAUGGUUUUGGCGAUACUAGCCUUUUUGAGAUUUACAGCAAUCAAGCCA	.((((...........)))).(((((((((((((((...((((((((((((.((((((...)))))).))))..)).)))))).....))))))))................))))))).	.(((.............))).(((((..(((((((....(((...((((((.((((((...)))))).)))))..)....)))......)))))))..................))))).	0.50833
171	290	37	-38.5	-1.75	0.06	30.82	CCCGUGUAAACCCCUUGGGAGGUUUGAAGAGGUUGCCAGCCGGACUUCUGCUGGGUCAUGGACCCAUCAGAAUGGUUUUGGCGAUACUAGCCUUUUUGAGAUUUACAGCAAUCAAGCCAU	((((...........)))).(((((((((((((((...((((((((((((.((((((...)))))).))))..)).)))))).....))))))))................)))))))..	((((...........)))).((((((.(((((((....(((...((((((.((((((...)))))).)))))..)....)))......))))))).................))))))..	0.5
172	291	37	-37.6	-1.65	0.06	33.34	CCGUGUAAACCCCUUGGGAGGUUUGAAGAGGUUGCCAGCCGGACUUCUGCUGGGUCAUGGACCCAUCAGAAUGGUUUUGGCGAUACUAGCCUUUUUGAGAUUUACAGCAAUCAAGCCAUC	...((((((.(.(..((((((((...((..(((((((((((...(((((.((((((...)))))).)))))))))..))))))).)))))))))).).).))))))((......))....	...((((((..........(((........(((((((((((...(((((.((((((...)))))).)))))))))..)))))))....))).........))))))..............	0.5
173	292	37	-37.6	-1.92	0.03	33.77	CGUGUAAACCCCUUGGGAGGUUUGAAGAGGUUGCCAGCCGGACUUCUGCUGGGUCAUGGACCCAUCAGAAUGGUUUUGGCGAUACUAGCCUUUUUGAGAUUUACAGCAAUCAAGCCAUCA	..((((((.(.(..((((((((...((..(((((((((((...(((((.((((((...)))))).)))))))))..))))))).)))))))))).).).))))))((......)).....	..((((((..........(((........(((((((((((...(((((.((((((...)))))).)))))))))..)))))))....))).........))))))...............	0.49167
174	293	37	-37.6	-1.65	0.03	34.26	GUGUAAACCCCUUGGGAGGUUUGAAGAGGUUGCCAGCCGGACUUCUGCUGGGUCAUGGACCCAUCAGAAUGGUUUUGGCGAUACUAGCCUUUUUGAGAUUUACAGCAAUCAAGCCAUCAC	.((((((.(.(..((((((((...((..(((((((((((...(((((.((((((...)))))).)))))))))..))))))).)))))))))).).).))))))((......))......	.((((((..........(((........(((((((((((...(((((.((((((...)))))).)))))))))..)))))))....))).........))))))................	0.49167
175	294	37	-37.6	-1.84	0.05	34.07	UGUAAACCCCUUGGGAGGUUUGAAGAGGUUGCCAGCCGGACUUCUGCUGGGUCAUGGACCCAUCAGAAUGGUUUUGGCGAUACUAGCCUUUUUGAGAUUUACAGCAAUCAAGCCAUCACU	((((((.(.(..((((((((...((..(((((((((((...(((((.((((((...)))))).)))))))))..))))))).)))))))))).).).))))))((......)).......	((((((..........((..........((((((((((...(((((.((((((...)))))).)))))))))..))))))......)).........)))))).................	0.48333
176	295	37	-37.3	-1.94	0.04	34.12	GUAAACCCCUUGGGAGGUUUGAAGAGGUUGCCAGCCGGACUUCUGCUGGGUCAUGGACCCAUCAGAAUGGUUUUGGCGAUACUAGCCUUUUUGAGAUUUACAGCAAUCAAGCCAUCACUG	.....(((...))).(((((((((((((((...((((((((((((.((((((...)))))).))))..)).)))))).....))))))))................))))))).......	......................(((((((....(((...((((((.((((((...)))))).)))))..)....)))......)))))))..............................	0.49167
177	296	37	-37.4	-1.83	0.05	27.11	UAAACCCCUUGGGAGGUUUGAAGAGGUUGCCAGCCGGACUUCUGCUGGGUCAUGGACCCAUCAGAAUGGUUUUGGCGAUACUAGCCUUUUUGAGAUUUACAGCAAUCAAGCCAUCACUGG	......((...((.(((((((((((((((...((((((((((((.((((((...)))))).))))..)).)))))).....))))))))................))))))).))...))	..............((((((.((((((((...((((.((.((((.((((((...)))))).))))...))..)))).....)))))))).................))))))........	0.49167
178	297	37	-40.7	-2.6	0.01	21.96	AAACCCCUUGGGAGGUUUGAAGAGGUUGCCAGCCGGACUUCUGCUGGGUCAUGGACCCAUCAGAAUGGUUUUGGCGAUACUAGCCUUUUUGAGAUUUACAGCAAUCAAGCCAUCACUGGG	....(((...((.(((((((((((((((...((((((((((((.((((((...)))))).))))..)).)))))).....))))))))................))))))).))...)))	....(((......(((((((((((((((...((((.((.((((.((((((...)))))).))))...))..)))).....))))))))................)))))))......)))	0.5
179	298	37	-41.1	-2.35	0.01	22.11	AACCCCUUGGGAGGUUUGAAGAGGUUGCCAGCCGGACUUCUGCUGGGUCAUGGACCCAUCAGAAUGGUUUUGGCGAUACUAGCCUUUUUGAGAUUUACAGCAAUCAAGCCAUCACUGGGC	...(((...((.(((((((((((((((...((((((((((((.((((((...)))))).))))..)).)))))).....))))))))................))))))).))...))).	...(((......(((((((((((((((...((((.((.((((.((((((...)))))).))))...))..)))).....))))))))................)))))))......))).	0.50833
180	299	37	-41.1	-1.96	0.05	22.27	ACCCCUUGGGAGGUUUGAAGAGGUUGCCAGCCGGACUUCUGCUGGGUCAUGGACCCAUCAGAAUGGUUUUGGCGAUACUAGCCUUUUUGAGAUUUACAGCAAUCAAGCCAUCACUGGGCC	..(((...((.(((((((((((((((...((((((((((((.((((((...)))))).))))..)).)))))).....))))))))................))))))).))...)))..	..(((......(((((((((((((((...((((.((.((((.((((((...)))))).))))...))..)))).....))))))))................)))))))......)))..	0.51667
181	300	37	-41.1	-2.12	0.03	21.57	CCCCUUGGGAGGUUUGAAGAGGUUGCCAGCCGGACUUCUGCUGGGUCAUGGACCCAUCAGAAUGGUUUUGGCGAUACUAGCCUUUUUGAGAUUUACAGCAAUCAAGCCAUCACUGGGCCU	.(((...((.(((((((((((((((...((((((((((((.((((((...)))))).))))..)).)))))).....))))))))................))))))).))...)))...	.(((......(((((((((((((((...((((.((.((((.((((((...)))))).))))...))..)))).....))))))))................)))))))......)))...	0.51667
182	301	37	-40.8	-1.76	0.05	20.05	CCCUUGGGAGGUUUGAAGAGGUUGCCAGCCGGACUUCUGCUGGGUCAUGGACCCAUCAGAAUGGUUUUGGCGAUACUAGCCUUUUUGAGAUUUACAGCAAUCAAGCCAUCACUGGGCCUU	(((...((.(((((((((((((((...((((((((((((.((((((...)))))).))))..)).)))))).....))))))))................))))))).))...)))....	(((...((.(((((((((((((((...((((.((.((((.((((((...)))))).))))...))..)))).....))))))))................))))))).))...)))....	0.50833
183	302	37	-38.8	-1.55	0.05	26.08	CCUUGGGAGGUUUGAAGAGGUUGCCAGCCGGACUUCUGCUGGGUCAUGGACCCAUCAGAAUGGUUUUGGCGAUACUAGCCUUUUUGAGAUUUACAGCAAUCAAGCCAUCACUGGGCCUUA	.((((((((((((((((((((((...((((((((((((.((((((...)))))).))))..)).)))))).....))))))))................))))))).)).))))).....	......(((((((((((((((((...((((.((.((((.((((((...)))))).))))...))..)))).....))))))))................))))))).))...........	0.5
184	303	37	-38.5	-1.79	0.03	30.42	CUUGGGAGGUUUGAAGAGGUUGCCAGCCGGACUUCUGCUGGGUCAUGGACCCAUCAGAAUGGUUUUGGCGAUACUAGCCUUUUUGAGAUUUACAGCAAUCAAGCCAUCACUGGGCCUUAU	((((((((((((((((((((((...((((((((((((.((((((...)))))).))))..)).)))))).....))))))))................))))))).)).)))))......	............((((((((((...((((.((.((((.((((((...)))))).))))...))..)))).....))))))))))....................................	0.49167
185	304	37	-38.2	-1.39	0.08	25.69	UUGGGAGGUUUGAAGAGGUUGCCAGCCGGACUUCUGCUGGGUCAUGGACCCAUCAGAAUGGUUUUGGCGAUACUAGCCUUUUUGAGAUUUACAGCAAUCAAGCCAUCACUGGGCCUUAUC	....(((((((((((((((((...((((((((((((.((((((...)))))).))))..)).)))))).....))))))))))))((((......))))...(((....))))))))...	....(((((((((((((((((...((((.((.((((.((((((...)))))).))))...))..)))).....))))))))))))(((........)))...((......)))))))...	0.49167
186	305	37	-38.2	-1.55	0.08	21.34	UGGGAGGUUUGAAGAGGUUGCCAGCCGGACUUCUGCUGGGUCAUGGACCCAUCAGAAUGGUUUUGGCGAUACUAGCCUUUUUGAGAUUUACAGCAAUCAAGCCAUCACUGGGCCUUAUCA	...(((((((((((((((((...((((((((((((.((((((...)))))).))))..)).)))))).....))))))))))))((((......))))...(((....))))))))....	...(((((((((((((((((...((((.((.((((.((((((...)))))).))))...))..)))).....))))))))))))((((......))))...(((....))))))))....	0.49167
187	306	37	-38.2	-1.84	0.03	20.53	GGGAGGUUUGAAGAGGUUGCCAGCCGGACUUCUGCUGGGUCAUGGACCCAUCAGAAUGGUUUUGGCGAUACUAGCCUUUUUGAGAUUUACAGCAAUCAAGCCAUCACUGGGCCUUAUCAA	..(((((((((((((((((...((((((((((((.((((((...)))))).))))..)).)))))).....))))))))))))((((......))))...(((....)))))))).....	..(((((((((((((((((...((((.((.((((.((((((...)))))).))))...))..)))).....))))))))))))((((......))))...(((....)))))))).....	0.49167
188	307	37	-38.2	-1.65	0.07	20.19	GGAGGUUUGAAGAGGUUGCCAGCCGGACUUCUGCUGGGUCAUGGACCCAUCAGAAUGGUUUUGGCGAUACUAGCCUUUUUGAGAUUUACAGCAAUCAAGCCAUCACUGGGCCUUAUCAAC	.(((((((((((((((((...((((((((((((.((((((...)))))).))))..)).)))))).....))))))))))))((((......))))...(((....))))))))......	.(((((((((((((((((...((((.((.((((.((((((...)))))).))))...))..)))).....))))))))))))((((......))))...(((....))))))))......	0.49167
189	308	37	-37.8	-2.35	0	19.7	GAGGUUUGAAGAGGUUGCCAGCCGGACUUCUGCUGGGUCAUGGACCCAUCAGAAUGGUUUUGGCGAUACUAGCCUUUUUGAGAUUUACAGCAAUCAAGCCAUCACUGGGCCUUAUCAACA	(((((((((((((((((...((((((((((((.((((((...)))))).))))..)).)))))).....))))))))))))((((......))))...(((....)))))))).......	(((((((((((((((((...((((.((.((((.((((((...)))))).))))...))..)))).....))))))))))))((((......))))...(((....)))))))).......	0.48333
190	309	37	-35.9	-1.57	0.05	27.31	AGGUUUGAAGAGGUUGCCAGCCGGACUUCUGCUGGGUCAUGGACCCAUCAGAAUGGUUUUGGCGAUACUAGCCUUUUUGAGAUUUACAGCAAUCAAGCCAUCACUGGGCCUUAUCAACAG	((((((((((((((((...((((((((((((.((((((...)))))).))))..)).)))))).....))))))))))))((((......))))...(((....))))))).........	.....(((((((((((...((((.((.((((.((((((...)))))).))))...))..)))).....))))))))))).........................................	0.48333
191	310	37	-36.4	-1.54	0.05	26.33	GGUUUGAAGAGGUUGCCAGCCGGACUUCUGCUGGGUCAUGGACCCAUCAGAAUGGUUUUGGCGAUACUAGCCUUUUUGAGAUUUACAGCAAUCAAGCCAUCACUGGGCCUUAUCAACAGA	(((((((((((((((...((((((((((((.((((((...)))))).))))..)).)))))).....))))))))................)))))))....(((...........))).	(((((.(((((((((...((((.((.((((.((((((...)))))).))))...))..)))).....))))))))).................)))))......................	0.48333
192	311	37	-35.5	-1.97	0.02	26.75	GUUUGAAGAGGUUGCCAGCCGGACUUCUGCUGGGUCAUGGACCCAUCAGAAUGGUUUUGGCGAUACUAGCCUUUUUGAGAUUUACAGCAAUCAAGCCAUCACUGGGCCUUAUCAACAGAU	..((((((((((((...((((((((((((.((((((...)))))).))))..)).)))))).....))))))))))))((((......))))..(((.......))).............	..(((((((((((....(((...(.((((.((((((...)))))).))))...)....)))......))))))))))).(..........)...(((.......))).............	0.475
193	312	37	-35.6	-1.57	0.07	21.17	UUUGAAGAGGUUGCCAGCCGGACUUCUGCUGGGUCAUGGACCCAUCAGAAUGGUUUUGGCGAUACUAGCCUUUUUGAGAUUUACAGCAAUCAAGCCAUCACUGGGCCUUAUCAACAGAUG	.((((((((((((...((((((((((((.((((((...)))))).))))..)).)))))).....))))))))))))((((......))))..(((.......)))..((((....))))	.((((((((((((...((((.((.((((.((((((...)))))).))))...))..)))).....))))))))))))................(((.......))).....(....)...	0.475
194	313	37	-37.2	-1.82	0.06	19.47	UUGAAGAGGUUGCCAGCCGGACUUCUGCUGGGUCAUGGACCCAUCAGAAUGGUUUUGGCGAUACUAGCCUUUUUGAGAUUUACAGCAAUCAAGCCAUCACUGGGCCUUAUCAACAGAUGG	((((((((((((...((((((((((((.((((((...)))))).))))..)).)))))).....))))))))))))((((......))))...(((((..(((......)))...)))))	((((((((((((...((((.((.((((.((((((...)))))).))))...))..)))).....))))))))))))((((......))))...(((((...(........)....)))))	0.48333
195	314	37	-37.6	-1.95	0.04	22.21	UGAAGAGGUUGCCAGCCGGACUUCUGCUGGGUCAUGGACCCAUCAGAAUGGUUUUGGCGAUACUAGCCUUUUUGAGAUUUACAGCAAUCAAGCCAUCACUGGGCCUUAUCAACAGAUGGG	.((((((((((...((((((((((((.((((((...)))))).))))..)).)))))).....))))))))))..((((......))))..(((.......)))((((((....))))))	.((((((((((...((((.((.((((.((((((...)))))).))))...))..)))).....))))))))))..((((......))))...............................	0.49167
196	315	37	-39.1	-2.36	0	17.59	GAAGAGGUUGCCAGCCGGACUUCUGCUGGGUCAUGGACCCAUCAGAAUGGUUUUGGCGAUACUAGCCUUUUUGAGAUUUACAGCAAUCAAGCCAUCACUGGGCCUUAUCAACAGAUGGGG	((((((((((...((((((((((((.((((((...)))))).))))..)).)))))).....))))))))))..((((......))))...(((....))).(((((((....)))))))	((((((((((...((((.((.((((.((((((...)))))).))))...))..)))).....))))))))))..((((......))))...((......)).(((((((....)))))))	0.5
197	316	37	-39.4	-2.22	0.02	17.99	AAGAGGUUGCCAGCCGGACUUCUGCUGGGUCAUGGACCCAUCAGAAUGGUUUUGGCGAUACUAGCCUUUUUGAGAUUUACAGCAAUCAAGCCAUCACUGGGCCUUAUCAACAGAUGGGGU	(((((((((...((((((((((((.((((((...)))))).))))..)).)))))).....)))))))))...((((......))))...(((....)))((((((((....))))))))	.((((((((...((((.((.((((.((((((...)))))).))))...))..)))).....)))))))).....................(((....)))((((((((....))))))))	0.49167
198	317	37	-38.9	-2.16	0.01	20.02	AGAGGUUGCCAGCCGGACUUCUGCUGGGUCAUGGACCCAUCAGAAUGGUUUUGGCGAUACUAGCCUUUUUGAGAUUUACAGCAAUCAAGCCAUCACUGGGCCUUAUCAACAGAUGGGGUU	.(((((((...((((((((((((.((((((...)))))).))))..)).)))))).....)))))))(((((............)))))(((....)))((((((((....)))))))).	.((((((....(((...(.((((.((((((...)))))).))))...)....)))......))))))......................(((....)))((((((((....)))))))).	0.49167
199	318	37	-38.8	-1.78	0.03	23.06	GAGGUUGCCAGCCGGACUUCUGCUGGGUCAUGGACCCAUCAGAAUGGUUUUGGCGAUACUAGCCUUUUUGAGAUUUACAGCAAUCAAGCCAUCACUGGGCCUUAUCAACAGAUGGGGUUC	...(((((((((((...(((((.((((((...)))))).)))))))))..))))))).((((....(((((............)))))......))))((((((((....))))))))..	((((((....(((...((((((.((((((...)))))).)))))..)....)))......))))))..............................((((((((((....))))))))))	0.5
200	319	37	-39.2	-1.99	0.04	22.36	AGGUUGCCAGCCGGACUUCUGCUGGGUCAUGGACCCAUCAGAAUGGUUUUGGCGAUACUAGCCUUUUUGAGAUUUACAGCAAUCAAGCCAUCACUGGGCCUUAUCAACAGAUGGGGUUCC	..(((((((((((...(((((.((((((...)))))).)))))))))..))))))).........(((((............)))))........((((((((((....)))))))))).	..(((((((((((...(((((.((((((...)))))).)))))))))..))))))).......................................((((((((((....)))))))))).	0.5
201	320	37	-39.2	-1.67	0.05	22.24	GGUUGCCAGCCGGACUUCUGCUGGGUCAUGGACCCAUCAGAAUGGUUUUGGCGAUACUAGCCUUUUUGAGAUUUACAGCAAUCAAGCCAUCACUGGGCCUUAUCAACAGAUGGGGUUCCG	.(((((((((((...(((((.((((((...)))))).)))))))))..))))))).........(((((............)))))........((((((((((....))))))))))..	.(((((((((((...(((((.((((((...)))))).)))))))))..))))))).......................................((((((((((....)))))))).)).	0.50833
202	321	37	-39.5	-2.08	0.01	14.07	GUUGCCAGCCGGACUUCUGCUGGGUCAUGGACCCAUCAGAAUGGUUUUGGCGAUACUAGCCUUUUUGAGAUUUACAGCAAUCAAGCCAUCACUGGGCCUUAUCAACAGAUGGGGUUCCGU	(((((((((((...(((((.((((((...)))))).)))))))))..))))))).........(((((............))))).....((.((((((((((....)))))))))).))	(((((((((((...(((((.((((((...)))))).)))))))))..))))))).......................................((((((((((....))))))))))...	0.5
203	322	37	-40.4	-2.35	0.01	11.78	UUGCCAGCCGGACUUCUGCUGGGUCAUGGACCCAUCAGAAUGGUUUUGGCGAUACUAGCCUUUUUGAGAUUUACAGCAAUCAAGCCAUCACUGGGCCUUAUCAACAGAUGGGGUUCCGUG	((((((((((...(((((.((((((...)))))).)))))))))..))))))..........(((((............)))))....(((.((((((((((....)))))))))).)))	((((((((((...(((((.((((((...)))))).)))))))))..))))))....................................(((.((((((((((....)))))))))).)))	0.5
204	323	37	-40.7	-2.02	0.05	13.66	UGCCAGCCGGACUUCUGCUGGGUCAUGGACCCAUCAGAAUGGUUUUGGCGAUACUAGCCUUUUUGAGAUUUACAGCAAUCAAGCCAUCACUGGGCCUUAUCAACAGAUGGGGUUCCGUGG	(((((((((...(((((.((((((...)))))).)))))))))..)))))...........(((((............)))))....(((.((((((((((....)))))))))).))).	(((((((((...(((((.((((((...)))))).)))))))))..))))).....................................(((.((((((((((....)))))))))).))).	0.50833
205	324	37	-40.8	-1.89	0.05	15.52	GCCAGCCGGACUUCUGCUGGGUCAUGGACCCAUCAGAAUGGUUUUGGCGAUACUAGCCUUUUUGAGAUUUACAGCAAUCAAGCCAUCACUGGGCCUUAUCAACAGAUGGGGUUCCGUGGG	((((((((...(((((.((((((...)))))).)))))))))..))))............(((((............)))))...((((.((((((((((....)))))))))).)))).	((((((((...(((((.((((((...)))))).)))))))))..))))......................................(((.((((((((((....)))))))))).)))..	0.51667
206	325	37	-40.7	-1.72	0.08	19.53	CCAGCCGGACUUCUGCUGGGUCAUGGACCCAUCAGAAUGGUUUUGGCGAUACUAGCCUUUUUGAGAUUUACAGCAAUCAAGCCAUCACUGGGCCUUAUCAACAGAUGGGGUUCCGUGGGG	..(((((...(((((.((((((...)))))).))))))))))..(((.......)))..(((((............)))))((.((((.((((((((((....)))))))))).))))))	..........(((((.((((((...)))))).)))))............................................((.((((.((((((((((....)))))))))).))))))	0.51667
207	326	37	-41.8	-2.38	0.01	16.38	CAGCCGGACUUCUGCUGGGUCAUGGACCCAUCAGAAUGGUUUUGGCGAUACUAGCCUUUUUGAGAUUUACAGCAAUCAAGCCAUCACUGGGCCUUAUCAACAGAUGGGGUUCCGUGGGGA	.(((((...(((((.((((((...)))))).))))))))))..(((.......)))..(((((............)))))((.((((.((((((((((....)))))))))).)))))).	..(((...((((((.((((((...)))))).)))))..)....)))..............(((............)))..((.((((.((((((((((....)))))))))).)))))).	0.50833
208	327	37	-41.3	-2.52	0.01	16.04	AGCCGGACUUCUGCUGGGUCAUGGACCCAUCAGAAUGGUUUUGGCGAUACUAGCCUUUUUGAGAUUUACAGCAAUCAAGCCAUCACUGGGCCUUAUCAACAGAUGGGGUUCCGUGGGGAA	.((((...(((((.((((((...)))))).)))))))))...(((.......)))..(((((............)))))((.((((.((((((((((....)))))))))).))))))..	.(((...(.((((.((((((...)))))).))))...)....)))..............(((............)))..((.((((.((((((((((....)))))))))).))))))..	0.5
209	328	37	-41.3	-2.36	0.03	12.96	GCCGGACUUCUGCUGGGUCAUGGACCCAUCAGAAUGGUUUUGGCGAUACUAGCCUUUUUGAGAUUUACAGCAAUCAAGCCAUCACUGGGCCUUAUCAACAGAUGGGGUUCCGUGGGGAAA	((((((((((((.((((((...)))))).))))..)).))))))............(((((............)))))((.((((.((((((((((....)))))))))).))))))...	((((.(((((((.((((((...)))))).))))..)))..))))...............(..............)...((.((((.((((((((((....)))))))))).))))))...	0.5
210	329	37	-39.6	-2.14	0.01	16.12	CCGGACUUCUGCUGGGUCAUGGACCCAUCAGAAUGGUUUUGGCGAUACUAGCCUUUUUGAGAUUUACAGCAAUCAAGCCAUCACUGGGCCUUAUCAACAGAUGGGGUUCCGUGGGGAAAA	..(((((((((.((((((...)))))).))))..))))).(((.......)))..(((((............)))))((.((((.((((((((((....)))))))))).))))))....	....((.((((.((((((...)))))).))))...))...(((.......)))........................((.((((.((((((((((....)))))))))).))))))....	0.49167
211	330	37	-39.6	-2.31	0.03	12.53	CGGACUUCUGCUGGGUCAUGGACCCAUCAGAAUGGUUUUGGCGAUACUAGCCUUUUUGAGAUUUACAGCAAUCAAGCCAUCACUGGGCCUUAUCAACAGAUGGGGUUCCGUGGGGAAAAA	.(((((((((.((((((...)))))).))))..))))).(((.......)))..(((((............)))))((.((((.((((((((((....)))))))))).)))))).....	..((((((((.((((((...)))))).))))..))))..(((.......)))........................((.((((.((((((((((....)))))))))).)))))).....	0.48333
212	331	37	-39.2	-2.32	0.03	13.69	GGACUUCUGCUGGGUCAUGGACCCAUCAGAAUGGUUUUGGCGAUACUAGCCUUUUUGAGAUUUACAGCAAUCAAGCCAUCACUGGGCCUUAUCAACAGAUGGGGUUCCGUGGGGAAAAAA	.((((((((.((((((...)))))).))))..))))..(((.......)))..(((((............)))))((.((((.((((((((((....)))))))))).))))))......	.(((.((((.((((((...)))))).))))...)))..(((.......)))........................((.((((.((((((((((....)))))))))).))))))......	0.475
213	332	37	-38.9	-1.89	0.05	14.67	GACUUCUGCUGGGUCAUGGACCCAUCAGAAUGGUUUUGGCGAUACUAGCCUUUUUGAGAUUUACAGCAAUCAAGCCAUCACUGGGCCUUAUCAACAGAUGGGGUUCCGUGGGGAAAAAAG	....((((.((((((...)))))).))))(((((((.(((.......))).......((((......)))))))))))(((.((((((((((....)))))))))).)))..........	....((((.((((((...)))))).))))........(((.......)))........................((.((((.((((((((((....)))))))))).)))))).......	0.475
214	333	37	-38.9	-2.87	0	14.71	ACUUCUGCUGGGUCAUGGACCCAUCAGAAUGGUUUUGGCGAUACUAGCCUUUUUGAGAUUUACAGCAAUCAAGCCAUCACUGGGCCUUAUCAACAGAUGGGGUUCCGUGGGGAAAAAAGA	...((((.((((((...)))))).))))(((((((.(((.......))).......((((......)))))))))))(((.((((((((((....)))))))))).)))...........	..(((((.((((((...)))))).))))).......(((.......))).......(((........)))...((.((((.((((((((((....)))))))))).))))))........	0.46667
215	334	37	-38.9	-3	0	15.18	CUUCUGCUGGGUCAUGGACCCAUCAGAAUGGUUUUGGCGAUACUAGCCUUUUUGAGAUUUACAGCAAUCAAGCCAUCACUGGGCCUUAUCAACAGAUGGGGUUCCGUGGGGAAAAAAGAG	..((((.((((((...)))))).))))(((((((.(((.......))).......((((......)))))))))))(((.((((((((((....)))))))))).)))............	.(((((.((((((...)))))).))))).......(((.......))).......(((........)))......((((.((((((((((....)))))))))).))))...........	0.475
216	335	37	-38.9	-2.63	0	17.4	UUCUGCUGGGUCAUGGACCCAUCAGAAUGGUUUUGGCGAUACUAGCCUUUUUGAGAUUUACAGCAAUCAAGCCAUCACUGGGCCUUAUCAACAGAUGGGGUUCCGUGGGGAAAAAAGAGG	.((((.((((((...)))))).))))(((((((.(((.......))).......((((......)))))))))))(((.((((((((((....)))))))))).))).............	.((((.((((((...)))))).))))........(((.......))).......((((......))))....(.((((.((((((((((....)))))))))).)))))...........	0.475
217	336	37	-40	-2.94	0.01	11.04	UCUGCUGGGUCAUGGACCCAUCAGAAUGGUUUUGGCGAUACUAGCCUUUUUGAGAUUUACAGCAAUCAAGCCAUCACUGGGCCUUAUCAACAGAUGGGGUUCCGUGGGGAAAAAAGAGGC	((((.((((((...)))))).))))((.((....)).))....((((((((..((((......))))...((.((((.((((((((((....)))))))))).))))))...))))))))	((((.((((((...)))))).))))..................((((((((..((((......))))...((.((((.((((((((((....)))))))))).))))))...))))))))	0.48333
218	337	37	-40	-2.58	0.02	10.19	CUGCUGGGUCAUGGACCCAUCAGAAUGGUUUUGGCGAUACUAGCCUUUUUGAGAUUUACAGCAAUCAAGCCAUCACUGGGCCUUAUCAACAGAUGGGGUUCCGUGGGGAAAAAAGAGGCU	(((.((((((...)))))).))).((.((....)).))...(((((((((..((((......))))...((.((((.((((((((((....)))))))))).))))))...)))))))))	(((.((((((...)))))).)))..................(((((((((..((((......))))...((.((((.((((((((((....)))))))))).))))))...)))))))))	0.48333
219	338	37	-38.3	-2.05	0.02	16.64	UGCUGGGUCAUGGACCCAUCAGAAUGGUUUUGGCGAUACUAGCCUUUUUGAGAUUUACAGCAAUCAAGCCAUCACUGGGCCUUAUCAACAGAUGGGGUUCCGUGGGGAAAAAAGAGGCUA	((.((((((...)))))).))..((.((....)).))..((((((((((..((((......))))...((.((((.((((((((((....)))))))))).))))))...))))))))))	...((((((...)))))).....................((((((((((..((((......))))...((.((((.((((((((((....)))))))))).))))))...))))))))))	0.475
220	339	37	-38.6	-2.58	0.01	14.31	GCUGGGUCAUGGACCCAUCAGAAUGGUUUUGGCGAUACUAGCCUUUUUGAGAUUUACAGCAAUCAAGCCAUCACUGGGCCUUAUCAACAGAUGGGGUUCCGUGGGGAAAAAAGAGGCUAU	..((((((...))))))((((((...))))))......((((((((((..((((......))))...((.((((.((((((((((....)))))))))).))))))...)))))))))).	..((((((...)))))).....................((((((((((..((((......))))...((.((((.((((((((((....)))))))))).))))))...)))))))))).	0.475
221	340	37	-38.6	-2.57	0.01	13.36	CUGGGUCAUGGACCCAUCAGAAUGGUUUUGGCGAUACUAGCCUUUUUGAGAUUUACAGCAAUCAAGCCAUCACUGGGCCUUAUCAACAGAUGGGGUUCCGUGGGGAAAAAAGAGGCUAUG	.((((((...))))))((((((...))))))......((((((((((..((((......))))...((.((((.((((((((((....)))))))))).))))))...))))))))))..	.((((((...)))))).((((.....)))).......((((((((((..((((......))))...((.((((.((((((((((....)))))))))).))))))...))))))))))..	0.475
222	341	37	-38.4	-1.97	0.03	13.82	UGGGUCAUGGACCCAUCAGAAUGGUUUUGGCGAUACUAGCCUUUUUGAGAUUUACAGCAAUCAAGCCAUCACUGGGCCUUAUCAACAGAUGGGGUUCCGUGGGGAAAAAAGAGGCUAUGG	((((((...))))))((((((...))))))......((((((((((..((((......))))...((.((((.((((((((((....)))))))))).))))))...))))))))))...	((((((...)))))).((((.....)))).......((((((((((..((((......))))...((.((((.((((((((((....)))))))))).))))))...))))))))))...	0.475
223	342	37	-37.9	-2.2	0.03	17.18	GGGUCAUGGACCCAUCAGAAUGGUUUUGGCGAUACUAGCCUUUUUGAGAUUUACAGCAAUCAAGCCAUCACUGGGCCUUAUCAACAGAUGGGGUUCCGUGGGGAAAAAAGAGGCUAUGGA	(((((...))))).((((((...))))))......((((((((((..((((......))))...((.((((.((((((((((....)))))))))).))))))...))))))))))....	(((((...)))))..((((.....)))).......((((((((((..((((......))))...((.((((.((((((((((....)))))))))).))))))...))))))))))....	0.475
224	343	37	-36	-2.14	0.02	13.3	GGUCAUGGACCCAUCAGAAUGGUUUUGGCGAUACUAGCCUUUUUGAGAUUUACAGCAAUCAAGCCAUCACUGGGCCUUAUCAACAGAUGGGGUUCCGUGGGGAAAAAAGAGGCUAUGGAA	.((((.(((((.........))))))))).....((((((((((..((((......))))...((.((((.((((((((((....)))))))))).))))))...)))))))))).....	.((((.((((..((....)).)))))))).....((((((((((..((((......))))...((.((((.((((((((((....)))))))))).))))))...)))))))))).....	0.46667
225	344	37	-36.1	-2.47	0.01	11.26	GUCAUGGACCCAUCAGAAUGGUUUUGGCGAUACUAGCCUUUUUGAGAUUUACAGCAAUCAAGCCAUCACUGGGCCUUAUCAACAGAUGGGGUUCCGUGGGGAAAAAAGAGGCUAUGGAAA	((((.(((((.........))))))))).....((((((((((..((((......))))...((.((((.((((((((((....)))))))))).))))))...))))))))))......	((((.((((..((....)).)))))))).....((((((((((..((((......))))...((.((((.((((((((((....)))))))))).))))))...))))))))))......	0.45833
226	345	37	-34	-1.78	0.05	18.17	UCAUGGACCCAUCAGAAUGGUUUUGGCGAUACUAGCCUUUUUGAGAUUUACAGCAAUCAAGCCAUCACUGGGCCUUAUCAACAGAUGGGGUUCCGUGGGGAAAAAAGAGGCUAUGGAAAU	((((((.(((.((((((.((((..(......).)))).))))))((((......))))...((.((((.((((((((((....)))))))))).))))))......).))))))))....	.(((((.((..((((((.((((...........)))).))))))((((......))))...((.((((.((((((((((....)))))))))).))))))........))))))).....	0.45
227	346	37	-33.5	-1.9	0.03	22.25	CAUGGACCCAUCAGAAUGGUUUUGGCGAUACUAGCCUUUUUGAGAUUUACAGCAAUCAAGCCAUCACUGGGCCUUAUCAACAGAUGGGGUUCCGUGGGGAAAAAAGAGGCUAUGGAAAUA	(((((.(((.((((((.((((..(......).)))).))))))((((......))))...((.((((.((((((((((....)))))))))).))))))......).)))))))......	(((((.((..((((((.(((.............))).))))))((((......))))...((.((((.((((((((((....)))))))))).))))))........)))))))......	0.45
228	347	37	-31.9	-2.02	0.02	17.55	AUGGACCCAUCAGAAUGGUUUUGGCGAUACUAGCCUUUUUGAGAUUUACAGCAAUCAAGCCAUCACUGGGCCUUAUCAACAGAUGGGGUUCCGUGGGGAAAAAAGAGGCUAUGGAAAUAA	......((((....))))............((((((((((..((((......))))...((.((((.((((((((((....)))))))))).))))))...)))))))))).........	..............................((((((((((..((((......))))...((.((((.((((((((((....)))))))))).))))))...)))))))))).........	0.44167
229	348	37	-31.9	-1.77	0.04	16.47	UGGACCCAUCAGAAUGGUUUUGGCGAUACUAGCCUUUUUGAGAUUUACAGCAAUCAAGCCAUCACUGGGCCUUAUCAACAGAUGGGGUUCCGUGGGGAAAAAAGAGGCUAUGGAAAUAAU	.....((((....))))............((((((((((..((((......))))...((.((((.((((((((((....)))))))))).))))))...))))))))))..........	......((......)).............((((((((((..((((......))))...((.((((.((((((((((....)))))))))).))))))...))))))))))..........	0.44167
230	349	37	-31.9	-1.42	0.07	16.52	GGACCCAUCAGAAUGGUUUUGGCGAUACUAGCCUUUUUGAGAUUUACAGCAAUCAAGCCAUCACUGGGCCUUAUCAACAGAUGGGGUUCCGUGGGGAAAAAAGAGGCUAUGGAAAUAAUA	....((((....))))............((((((((((..((((......))))...((.((((.((((((((((....)))))))))).))))))...))))))))))...........	......(......)..............((((((((((..((((......))))...((.((((.((((((((((....)))))))))).))))))...))))))))))...........	0.44167
231	350	37	-31.9	-1.77	0.04	17.31	GACCCAUCAGAAUGGUUUUGGCGAUACUAGCCUUUUUGAGAUUUACAGCAAUCAAGCCAUCACUGGGCCUUAUCAACAGAUGGGGUUCCGUGGGGAAAAAAGAGGCUAUGGAAAUAAUAA	...((((....))))............((((((((((..((((......))))...((.((((.((((((((((....)))))))))).))))))...))))))))))............	...........................((((((((((..((((......))))...((.((((.((((((((((....)))))))))).))))))...))))))))))............	0.43333
232	351	37	-31.9	-1.85	0.03	17.51	ACCCAUCAGAAUGGUUUUGGCGAUACUAGCCUUUUUGAGAUUUACAGCAAUCAAGCCAUCACUGGGCCUUAUCAACAGAUGGGGUUCCGUGGGGAAAAAAGAGGCUAUGGAAAUAAUAAA	..((((....))))............((((((((((..((((......))))...((.((((.((((((((((....)))))))))).))))))...)))))))))).............	..........................((((((((((..((((......))))...((.((((.((((((((((....)))))))))).))))))...)))))))))).............	0.425
233	352	37	-31.9	-1.97	0.02	17.22	CCCAUCAGAAUGGUUUUGGCGAUACUAGCCUUUUUGAGAUUUACAGCAAUCAAGCCAUCACUGGGCCUUAUCAACAGAUGGGGUUCCGUGGGGAAAAAAGAGGCUAUGGAAAUAAUAAAG	.((((....))))............((((((((((..((((......))))...((.((((.((((((((((....)))))))))).))))))...))))))))))..............	.........................((((((((((..((((......))))...((.((((.((((((((((....)))))))))).))))))...))))))))))..............	0.43333
234	353	37	-31.5	-2.17	0.04	17.61	CCAUCAGAAUGGUUUUGGCGAUACUAGCCUUUUUGAGAUUUACAGCAAUCAAGCCAUCACUGGGCCUUAUCAACAGAUGGGGUUCCGUGGGGAAAAAAGAGGCUAUGGAAAUAAUAAAGA	((((....))))............((((((((((..((((......))))...((.((((.((((((((((....)))))))))).))))))...))))))))))...............	........................((((((((((..((((......))))...((.((((.((((((((((....)))))))))).))))))...))))))))))...............	0.425
235	354	37	-30.9	-2.56	0.02	18.18	CAUCAGAAUGGUUUUGGCGAUACUAGCCUUUUUGAGAUUUACAGCAAUCAAGCCAUCACUGGGCCUUAUCAACAGAUGGGGUUCCGUGGGGAAAAAAGAGGCUAUGGAAAUAAUAAAGAA	(.((((((...)))))).)....((((((((((..((((......))))...((.((((.((((((((((....)))))))))).))))))...))))))))))................	...((((.....)))).......((((((((((..((((......))))...((.((((.((((((((((....)))))))))).))))))...))))))))))................	0.41667
236	355	37	-30.4	-2.42	0.02	20.09	AUCAGAAUGGUUUUGGCGAUACUAGCCUUUUUGAGAUUUACAGCAAUCAAGCCAUCACUGGGCCUUAUCAACAGAUGGGGUUCCGUGGGGAAAAAAGAGGCUAUGGAAAUAAUAAAGAAG	.((((((...))))))......((((((((((..((((......))))...((.((((.((((((((((....)))))))))).))))))...)))))))))).................	......................((((((((((..((((......))))...((.((((.((((((((((....)))))))))).))))))...)))))))))).................	0.41667
237	356	37	-30.3	-1.59	0.08	20.51	UCAGAAUGGUUUUGGCGAUACUAGCCUUUUUGAGAUUUACAGCAAUCAAGCCAUCACUGGGCCUUAUCAACAGAUGGGGUUCCGUGGGGAAAAAAGAGGCUAUGGAAAUAAUAAAGAAGU	.(((((...))))).......((((((((((..((((......))))...((.((((.((((((((((....)))))))))).))))))...))))))))))..................	.....................((((((((((..((((......))))...((.((((.((((((((((....)))))))))).))))))...))))))))))..................	0.41667
238	357	37	-30.1	-1.87	0.05	15.17	CAGAAUGGUUUUGGCGAUACUAGCCUUUUUGAGAUUUACAGCAAUCAAGCCAUCACUGGGCCUUAUCAACAGAUGGGGUUCCGUGGGGAAAAAAGAGGCUAUGGAAAUAAUAAAGAAGUU	(((((...))))).......((((((((((..((((......))))...((.((((.((((((((((....)))))))))).))))))...))))))))))...................	....................((((((((((..((((......))))...((.((((.((((((((((....)))))))))).))))))...))))))))))...................	0.41667
239	358	37	-32.7	-2.21	0.01	8.11	AGAAUGGUUUUGGCGAUACUAGCCUUUUUGAGAUUUACAGCAAUCAAGCCAUCACUGGGCCUUAUCAACAGAUGGGGUUCCGUGGGGAAAAAAGAGGCUAUGGAAAUAAUAAAGAAGUUC	.((((..(((((......(((((((((((..((((......))))...((.((((.((((((((((....)))))))))).))))))...)))))))))).).......)))))..))))	.((((..(((((......(((((((((((..((((......))))...((.((((.((((((((((....)))))))))).))))))...)))))))))).).......)))))..))))	0.41667
240	359	37	-34.2	-3.39	0	7.09	GAAUGGUUUUGGCGAUACUAGCCUUUUUGAGAUUUACAGCAAUCAAGCCAUCACUGGGCCUUAUCAACAGAUGGGGUUCCGUGGGGAAAAAAGAGGCUAUGGAAAUAAUAAAGAAGUUCA	((((..(((((......(((((((((((..((((......))))...((.((((.((((((((((....)))))))))).))))))...)))))))))).).......)))))..)))).	((((..(((((......(((((((((((..((((......))))...((.((((.((((((((((....)))))))))).))))))...)))))))))).).......)))))..)))).	0.41667
241	360	37	-29.9	-2.18	0.03	14.21	AAUGGUUUUGGCGAUACUAGCCUUUUUGAGAUUUACAGCAAUCAAGCCAUCACUGGGCCUUAUCAACAGAUGGGGUUCCGUGGGGAAAAAAGAGGCUAUGGAAAUAAUAAAGAAGUUCAA	.((.((....)).))..((((((((((..((((......))))...((.((((.((((((((((....)))))))))).))))))...))))))))))......................	.................((((((((((..((((......))))...((.((((.((((((((((....)))))))))).))))))...))))))))))......................	0.40833
242	361	37	-29.9	-1.5	0.09	13.62	AUGGUUUUGGCGAUACUAGCCUUUUUGAGAUUUACAGCAAUCAAGCCAUCACUGGGCCUUAUCAACAGAUGGGGUUCCGUGGGGAAAAAAGAGGCUAUGGAAAUAAUAAAGAAGUUCAAG	...(((((.(......((((((((((..((((......))))...((.((((.((((((((((....)))))))))).))))))...))))))))))).)))))................	................((((((((((..((((......))))...((.((((.((((((((((....)))))))))).))))))...)))))))))).......................	0.41667
243	362	37	-29.9	-1.64	0.04	13.85	UGGUUUUGGCGAUACUAGCCUUUUUGAGAUUUACAGCAAUCAAGCCAUCACUGGGCCUUAUCAACAGAUGGGGUUCCGUGGGGAAAAAAGAGGCUAUGGAAAUAAUAAAGAAGUUCAAGA	..(((((.(......((((((((((..((((......))))...((.((((.((((((((((....)))))))))).))))))...))))))))))).))))).................	...............((((((((((..((((......))))...((.((((.((((((((((....)))))))))).))))))...))))))))))........................	0.41667
244	363	37	-29.9	-2.09	0.04	14.61	GGUUUUGGCGAUACUAGCCUUUUUGAGAUUUACAGCAAUCAAGCCAUCACUGGGCCUUAUCAACAGAUGGGGUUCCGUGGGGAAAAAAGAGGCUAUGGAAAUAAUAAAGAAGUUCAAGAA	.(((((.(......((((((((((..((((......))))...((.((((.((((((((((....)))))))))).))))))...))))))))))).)))))..................	..............((((((((((..((((......))))...((.((((.((((((((((....)))))))))).))))))...)))))))))).........................	0.41667
245	364	37	-29.8	-2.26	0.01	15.58	GUUUUGGCGAUACUAGCCUUUUUGAGAUUUACAGCAAUCAAGCCAUCACUGGGCCUUAUCAACAGAUGGGGUUCCGUGGGGAAAAAAGAGGCUAUGGAAAUAAUAAAGAAGUUCAAGAAA	.............((((((((((..((((......))))...((.((((.((((((((((....)))))))))).))))))...))))))))))..........................	.............((((((((((..((((......))))...((.((((.((((((((((....)))))))))).))))))...))))))))))..........................	0.40833
246	365	37	-29.8	-2.5	0.02	15.54	UUUUGGCGAUACUAGCCUUUUUGAGAUUUACAGCAAUCAAGCCAUCACUGGGCCUUAUCAACAGAUGGGGUUCCGUGGGGAAAAAAGAGGCUAUGGAAAUAAUAAAGAAGUUCAAGAAAG	............((((((((((..((((......))))...((.((((.((((((((((....)))))))))).))))))...))))))))))...........................	............((((((((((..((((......))))...((.((((.((((((((((....)))))))))).))))))...))))))))))...........................	0.40833
247	366	37	-29.8	-2.53	0	15.31	UUUGGCGAUACUAGCCUUUUUGAGAUUUACAGCAAUCAAGCCAUCACUGGGCCUUAUCAACAGAUGGGGUUCCGUGGGGAAAAAAGAGGCUAUGGAAAUAAUAAAGAAGUUCAAGAAAGA	...........((((((((((..((((......))))...((.((((.((((((((((....)))))))))).))))))...))))))))))............................	...........((((((((((..((((......))))...((.((((.((((((((((....)))))))))).))))))...))))))))))............................	0.40833
248	367	37	-29.8	-2.39	0.01	15.09	UUGGCGAUACUAGCCUUUUUGAGAUUUACAGCAAUCAAGCCAUCACUGGGCCUUAUCAACAGAUGGGGUUCCGUGGGGAAAAAAGAGGCUAUGGAAAUAAUAAAGAAGUUCAAGAAAGAU	..........((((((((((..((((......))))...((.((((.((((((((((....)))))))))).))))))...)))))))))).............................	..........((((((((((..((((......))))...((.((((.((((((((((....)))))))))).))))))...)))))))))).............................	0.40833
249	368	37	-29.8	-1.91	0.04	15.11	UGGCGAUACUAGCCUUUUUGAGAUUUACAGCAAUCAAGCCAUCACUGGGCCUUAUCAACAGAUGGGGUUCCGUGGGGAAAAAAGAGGCUAUGGAAAUAAUAAAGAAGUUCAAGAAAGAUC	.........((((((((((..((((......))))...((.((((.((((((((((....)))))))))).))))))...))))))))))..............................	.........((((((((((..((((......))))...((.((((.((((((((((....)))))))))).))))))...))))))))))..............................	0.41667
250	369	37	-29.8	-2.04	0.02	14.65	GGCGAUACUAGCCUUUUUGAGAUUUACAGCAAUCAAGCCAUCACUGGGCCUUAUCAACAGAUGGGGUUCCGUGGGGAAAAAAGAGGCUAUGGAAAUAAUAAAGAAGUUCAAGAAAGAUCU	........((((((((((..((((......))))...((.((((.((((((((((....)))))))))).))))))...))))))))))...............................	........((((((((((..((((......))))...((.((((.((((((((((....)))))))))).))))))...))))))))))...............................	0.41667
251	370	37	-30.4	-3.02	0	11.59	GCGAUACUAGCCUUUUUGAGAUUUACAGCAAUCAAGCCAUCACUGGGCCUUAUCAACAGAUGGGGUUCCGUGGGGAAAAAAGAGGCUAUGGAAAUAAUAAAGAAGUUCAAGAAAGAUCUU	.......((((((((((..((((......))))...((.((((.((((((((((....)))))))))).))))))...))))))))))..............(((.((......)).)))	.......((((((((((..((((......))))...((.((((.((((((((((....)))))))))).))))))...))))))))))...................(......).....	0.40833
252	371	37	-32.1	-2.74	0	10.04	CGAUACUAGCCUUUUUGAGAUUUACAGCAAUCAAGCCAUCACUGGGCCUUAUCAACAGAUGGGGUUCCGUGGGGAAAAAAGAGGCUAUGGAAAUAAUAAAGAAGUUCAAGAAAGAUCUUG	......((((((((((..((((......))))...((.((((.((((((((((....)))))))))).))))))...))))))))))...................(((((....)))))	......((((((((((..((((......))))...((.((((.((((((((((....)))))))))).))))))...))))))))))...................(((((....)))))	0.40833
253	372	37	-32.5	-2.83	0.01	8.55	GAUACUAGCCUUUUUGAGAUUUACAGCAAUCAAGCCAUCACUGGGCCUUAUCAACAGAUGGGGUUCCGUGGGGAAAAAAGAGGCUAUGGAAAUAAUAAAGAAGUUCAAGAAAGAUCUUGC	.....((((((((((..((((......))))...((.((((.((((((((((....)))))))))).))))))...))))))))))...................(((((....))))).	.....((((((((((..((((......))))...((.((((.((((((((((....)))))))))).))))))...))))))))))...................(((((....))))).	0.40833
254	373	37	-32.5	-3.05	0.01	9.66	AUACUAGCCUUUUUGAGAUUUACAGCAAUCAAGCCAUCACUGGGCCUUAUCAACAGAUGGGGUUCCGUGGGGAAAAAAGAGGCUAUGGAAAUAAUAAAGAAGUUCAAGAAAGAUCUUGCU	....((((((((((..((((......))))...((.((((.((((((((((....)))))))))).))))))...))))))))))...................(((((....)))))..	....((((((((((..((((......))))...((.((((.((((((((((....)))))))))).))))))...))))))))))...................(((((....)))))..	0.4
255	374	37	-32.5	-2.9	0.01	10.91	UACUAGCCUUUUUGAGAUUUACAGCAAUCAAGCCAUCACUGGGCCUUAUCAACAGAUGGGGUUCCGUGGGGAAAAAAGAGGCUAUGGAAAUAAUAAAGAAGUUCAAGAAAGAUCUUGCUG	...((((((((((..((((......))))...((.((((.((((((((((....)))))))))).))))))...))))))))))...................(((((....)))))...	...((((((((((..((((......))))...((.((((.((((((((((....)))))))))).))))))...))))))))))...................(((((....)))))...	0.40833
256	375	37	-32.5	-2.69	0	10.34	ACUAGCCUUUUUGAGAUUUACAGCAAUCAAGCCAUCACUGGGCCUUAUCAACAGAUGGGGUUCCGUGGGGAAAAAAGAGGCUAUGGAAAUAAUAAAGAAGUUCAAGAAAGAUCUUGCUGC	..((((((((((..((((......))))...((.((((.((((((((((....)))))))))).))))))...))))))))))...................(((((....)))))....	..((((((((((..((((......))))...((.((((.((((((((((....)))))))))).))))))...))))))))))...................(((((....)))))....	0.41667
257	376	37	-33.3	-2.81	0.01	8.98	CUAGCCUUUUUGAGAUUUACAGCAAUCAAGCCAUCACUGGGCCUUAUCAACAGAUGGGGUUCCGUGGGGAAAAAAGAGGCUAUGGAAAUAAUAAAGAAGUUCAAGAAAGAUCUUGCUGCC	.((((((((((..((((......))))...((.((((.((((((((((....)))))))))).))))))...))))))))))................((.(((((....)))))..)).	.((((((((((..((((......))))...((.((((.((((((((((....)))))))))).))))))...))))))))))................((.(((((....)))))..)).	0.425
258	377	37	-33.1	-3.14	0	9.98	UAGCCUUUUUGAGAUUUACAGCAAUCAAGCCAUCACUGGGCCUUAUCAACAGAUGGGGUUCCGUGGGGAAAAAAGAGGCUAUGGAAAUAAUAAAGAAGUUCAAGAAAGAUCUUGCUGCCA	((((((((((..((((......))))...((.((((.((((((((((....)))))))))).))))))...))))))))))................((.(((((....)))))..))..	((((((((((..((((......))))...((.((((.((((((((((....)))))))))).))))))...))))))))))...................(((((....)))))......	0.41667
259	378	37	-31.9	-3.18	0.01	12.43	AGCCUUUUUGAGAUUUACAGCAAUCAAGCCAUCACUGGGCCUUAUCAACAGAUGGGGUUCCGUGGGGAAAAAAGAGGCUAUGGAAAUAAUAAAGAAGUUCAAGAAAGAUCUUGCUGCCAU	(((((((((..((((......))))...((.((((.((((((((((....)))))))))).))))))...))))))))).................((.(((((....)))))..))...	(((((((((..((((......))))...((.((((.((((((((((....)))))))))).))))))...)))))))))....................(((((....))))).......	0.41667
260	379	37	-31.2	-2.22	0	13.39	GCCUUUUUGAGAUUUACAGCAAUCAAGCCAUCACUGGGCCUUAUCAACAGAUGGGGUUCCGUGGGGAAAAAAGAGGCUAUGGAAAUAAUAAAGAAGUUCAAGAAAGAUCUUGCUGCCAUG	((((((((..((((......))))...((.((((.((((((((((....)))))))))).))))))...))))))))(((((................(((((....)))))...)))))	((((((((..((((......))))...((.((((.((((((((((....)))))))))).))))))...)))))))).((((................(((((....)))))...)))).	0.425
261	380	37	-27.7	-1.37	0.1	25.86	CCUUUUUGAGAUUUACAGCAAUCAAGCCAUCACUGGGCCUUAUCAACAGAUGGGGUUCCGUGGGGAAAAAAGAGGCUAUGGAAAUAAUAAAGAAGUUCAAGAAAGAUCUUGCUGCCAUGU	(((((((..((((......))))...((.((((.((((((((((....)))))))))).))))))...))))))).(((((................(((((....)))))...))))).	..........................((.((((.((((((((((....)))))))))).))))))................................(((((....))))).........	0.41667
262	381	37	-26.5	-1.23	0.13	23.28	CUUUUUGAGAUUUACAGCAAUCAAGCCAUCACUGGGCCUUAUCAACAGAUGGGGUUCCGUGGGGAAAAAAGAGGCUAUGGAAAUAAUAAAGAAGUUCAAGAAAGAUCUUGCUGCCAUGUU	((((((...((((..(((.......((.((((.((((((((((....)))))))))).)))))).........)))....))))....))))))..(((((....)))))..........	...............(((.......((.((((.((((((((((....)))))))))).)))))).........)))....................(((((....)))))..........	0.40833
263	382	37	-25.7	-0.57	0.28	26.7	UUUUUGAGAUUUACAGCAAUCAAGCCAUCACUGGGCCUUAUCAACAGAUGGGGUUCCGUGGGGAAAAAAGAGGCUAUGGAAAUAAUAAAGAAGUUCAAGAAAGAUCUUGCUGCCAUGUUG	((((((..((((..(((.......((.((((.((((((((((....)))))))))).)))))).........)))....))))..)))))).((.(((((....)))))..)).......	...............((.......((.((((.((((((((((....)))))))))).)))))).........)).....................(((((....)))))...........	0.40833
264	383	37	-25.7	-1.16	0.13	29.6	UUUUGAGAUUUACAGCAAUCAAGCCAUCACUGGGCCUUAUCAACAGAUGGGGUUCCGUGGGGAAAAAAGAGGCUAUGGAAAUAAUAAAGAAGUUCAAGAAAGAUCUUGCUGCCAUGUUGA	............(((((......((.((((.((((((((((....)))))))))).))))))........(((.....................(((((....)))))..))).))))).	.......................((.((((.((((((((((....)))))))))).))))))................................(((((....)))))............	0.40833
265	384	37	-25.7	-1.07	0.13	31.16	UUUGAGAUUUACAGCAAUCAAGCCAUCACUGGGCCUUAUCAACAGAUGGGGUUCCGUGGGGAAAAAAGAGGCUAUGGAAAUAAUAAAGAAGUUCAAGAAAGAUCUUGCUGCCAUGUUGAG	...........(((((......((.((((.((((((((((....)))))))))).))))))........(((.....................(((((....)))))..))).)))))..	......................((.((((.((((((((((....)))))))))).))))))...................................(......)................	0.41667
266	385	37	-25.7	-1.08	0.11	31.01	UUGAGAUUUACAGCAAUCAAGCCAUCACUGGGCCUUAUCAACAGAUGGGGUUCCGUGGGGAAAAAAGAGGCUAUGGAAAUAAUAAAGAAGUUCAAGAAAGAUCUUGCUGCCAUGUUGAGA	..........(((((......((.((((.((((((((((....)))))))))).))))))........(((.....................(((((....)))))..))).)))))...	.....................((.((((.((((((((((....)))))))))).))))))..................................((......))................	0.41667
267	386	37	-25.7	-1.26	0.1	28.62	UGAGAUUUACAGCAAUCAAGCCAUCACUGGGCCUUAUCAACAGAUGGGGUUCCGUGGGGAAAAAAGAGGCUAUGGAAAUAAUAAAGAAGUUCAAGAAAGAUCUUGCUGCCAUGUUGAGAA	.........(((((......((.((((.((((((((((....)))))))))).))))))........(((.....................(((((....)))))..))).)))))....	.........((((.......((.((((.((((((((((....)))))))))).))))))................................(((((....))))).......))))....	0.41667
268	387	37	-26.2	-1.75	0.05	26.69	GAGAUUUACAGCAAUCAAGCCAUCACUGGGCCUUAUCAACAGAUGGGGUUCCGUGGGGAAAAAAGAGGCUAUGGAAAUAAUAAAGAAGUUCAAGAAAGAUCUUGCUGCCAUGUUGAGAAU	...((((.(((((......((.((((.((((((((((....)))))))))).))))))........(((.....................(((((....)))))..))).))))).))))	........(((((......((.((((.((((((((((....)))))))))).))))))................................(((((....)))))......))))).....	0.41667
269	388	37	-26.9	-1.72	0.06	24.25	AGAUUUACAGCAAUCAAGCCAUCACUGGGCCUUAUCAACAGAUGGGGUUCCGUGGGGAAAAAAGAGGCUAUGGAAAUAAUAAAGAAGUUCAAGAAAGAUCUUGCUGCCAUGUUGAGAAUA	..((((.(((((......((.((((.((((((((((....)))))))))).))))))........(((.....................(((((....)))))..))).))))).)))).	..((((.(((((......((.((((.((((((((((....)))))))))).))))))................................(((((....)))))......))))).)))).	0.40833
270	389	37	-26.9	-2	0.03	24.37	GAUUUACAGCAAUCAAGCCAUCACUGGGCCUUAUCAACAGAUGGGGUUCCGUGGGGAAAAAAGAGGCUAUGGAAAUAAUAAAGAAGUUCAAGAAAGAUCUUGCUGCCAUGUUGAGAAUAA	.((((.(((((......((.((((.((((((((((....)))))))))).))))))........(((.....................(((((....)))))..))).))))).))))..	.((((.(((((......((.((((.((((((((((....)))))))))).))))))................................(((((....)))))......))))).))))..	0.40833
271	390	37	-26.5	-1.83	0.04	25.12	AUUUACAGCAAUCAAGCCAUCACUGGGCCUUAUCAACAGAUGGGGUUCCGUGGGGAAAAAAGAGGCUAUGGAAAUAAUAAAGAAGUUCAAGAAAGAUCUUGCUGCCAUGUUGAGAAUAAU	((((.(((((......((.((((.((((((((((....)))))))))).))))))........(((.....................(((((....)))))..))).))))).))))...	((((.(((((......((.((((.((((((((((....)))))))))).))))))................................(((((....)))))......))))).))))...	0.4
272	391	37	-25.7	-1.2	0.13	27	UUUACAGCAAUCAAGCCAUCACUGGGCCUUAUCAACAGAUGGGGUUCCGUGGGGAAAAAAGAGGCUAUGGAAAUAAUAAAGAAGUUCAAGAAAGAUCUUGCUGCCAUGUUGAGAAUAAUC	....(((((......((.((((.((((((((((....)))))))))).))))))........(((.....................(((((....)))))..))).))))).........	....(((((......((.((((.((((((((((....)))))))))).))))))................................(((((....)))))......))))).........	0.40833
273	392	37	-25.7	-1.39	0.09	28.64	UUACAGCAAUCAAGCCAUCACUGGGCCUUAUCAACAGAUGGGGUUCCGUGGGGAAAAAAGAGGCUAUGGAAAUAAUAAAGAAGUUCAAGAAAGAUCUUGCUGCCAUGUUGAGAAUAAUCA	...(((((......((.((((.((((((((((....)))))))))).))))))........(((.....................(((((....)))))..))).)))))..........	..............((.((((.((((((((((....)))))))))).)))))).................................(((......)))......................	0.40833
274	393	37	-25.8	-1.55	0.05	27.87	UACAGCAAUCAAGCCAUCACUGGGCCUUAUCAACAGAUGGGGUUCCGUGGGGAAAAAAGAGGCUAUGGAAAUAAUAAAGAAGUUCAAGAAAGAUCUUGCUGCCAUGUUGAGAAUAAUCAA	..((((.......(((....)))((((((((....))))))))(((((((............)))))))..........(((.((......)).))))))).....((((......))))	..((((..........((((.((((((((((....)))))))))).))))...............................................))))......(((......))).	0.40833
275	394	37	-27.2	-2.11	0.01	24.99	ACAGCAAUCAAGCCAUCACUGGGCCUUAUCAACAGAUGGGGUUCCGUGGGGAAAAAAGAGGCUAUGGAAAUAAUAAAGAAGUUCAAGAAAGAUCUUGCUGCCAUGUUGAGAAUAAUCAAU	.((((.......(((....)))((((((((....))))))))(((((((............)))))))..........(((.((......)).)))))))....(((((......)))))	.(((((.........((((.((((((((((....)))))))))).))))..............................................)))))....(((((......)))))	0.40833
276	395	37	-27.4	-1.76	0.05	25.33	CAGCAAUCAAGCCAUCACUGGGCCUUAUCAACAGAUGGGGUUCCGUGGGGAAAAAAGAGGCUAUGGAAAUAAUAAAGAAGUUCAAGAAAGAUCUUGCUGCCAUGUUGAGAAUAAUCAAUG	.(((.......((.((((.((((((((((....)))))))))).)))))).........)))((((................(((((....)))))...))))(((((......))))).	((((.......((.((((.((((((((((....)))))))))).)))))).............................................))))....(((((......))))).	0.41667
277	396	37	-27.3	-1.95	0.03	19.48	AGCAAUCAAGCCAUCACUGGGCCUUAUCAACAGAUGGGGUUCCGUGGGGAAAAAAGAGGCUAUGGAAAUAAUAAAGAAGUUCAAGAAAGAUCUUGCUGCCAUGUUGAGAAUAAUCAAUGC	(((.......((.((((.((((((((((....)))))))))).)))))).........)))((((................(((((....)))))...))))(((((......)))))..	.((.......((.((((.((((((((((....)))))))))).)))))).........)).....................(((((....))))).......(((((......)))))..	0.41667
278	397	37	-26.9	-1.61	0.05	21.82	GCAAUCAAGCCAUCACUGGGCCUUAUCAACAGAUGGGGUUCCGUGGGGAAAAAAGAGGCUAUGGAAAUAAUAAAGAAGUUCAAGAAAGAUCUUGCUGCCAUGUUGAGAAUAAUCAAUGCU	((.......((.((((.((((((((((....)))))))))).))))))........(((.....................(((((....)))))..)))..(((((......))))))).	((.......((.((((.((((((((((....)))))))))).))))))................................(((((....))))).......(((((......))))))).	0.41667
279	398	37	-26.5	-1.43	0.08	19.36	CAAUCAAGCCAUCACUGGGCCUUAUCAACAGAUGGGGUUCCGUGGGGAAAAAAGAGGCUAUGGAAAUAAUAAAGAAGUUCAAGAAAGAUCUUGCUGCCAUGUUGAGAAUAAUCAAUGCUA	........((.((((.((((((((((....)))))))))).))))))........(((.....................(((((....)))))..)))..(((((......)))))....	........((.((((.((((((((((....)))))))))).))))))................................(((((....))))).......(((((......)))))....	0.40833
280	399	37	-26.5	-1.87	0.03	19.91	AAUCAAGCCAUCACUGGGCCUUAUCAACAGAUGGGGUUCCGUGGGGAAAAAAGAGGCUAUGGAAAUAAUAAAGAAGUUCAAGAAAGAUCUUGCUGCCAUGUUGAGAAUAAUCAAUGCUAG	.......((.((((.((((((((((....)))))))))).))))))........(((.....................(((((....)))))..)))..(((((......))))).....	.......((.((((.((((((((((....)))))))))).))))))................................(((((....))))).......(((((......))))).....	0.40833
281	400	37	-26.5	-1.45	0.08	22.14	AUCAAGCCAUCACUGGGCCUUAUCAACAGAUGGGGUUCCGUGGGGAAAAAAGAGGCUAUGGAAAUAAUAAAGAAGUUCAAGAAAGAUCUUGCUGCCAUGUUGAGAAUAAUCAAUGCUAGG	......((.((((.((((((((((....)))))))))).))))))........(((.....................(((((....)))))..)))..(((((......)))))......	.........((((.((((((((((....)))))))))).))))..................................(((((....))))).......(((((......)))))......	0.41667
282	401	37	-26.5	-1.58	0.07	23.65	UCAAGCCAUCACUGGGCCUUAUCAACAGAUGGGGUUCCGUGGGGAAAAAAGAGGCUAUGGAAAUAAUAAAGAAGUUCAAGAAAGAUCUUGCUGCCAUGUUGAGAAUAAUCAAUGCUAGGA	.....((.((((.((((((((((....)))))))))).))))))........(((.....................(((((....)))))..)))..(((((......))))).......	........((((.((((((((((....)))))))))).))))..................................(((((....))))).......(((((......))))).......	0.41667
283	402	37	-27	-2.01	0.04	23.89	CAAGCCAUCACUGGGCCUUAUCAACAGAUGGGGUUCCGUGGGGAAAAAAGAGGCUAUGGAAAUAAUAAAGAAGUUCAAGAAAGAUCUUGCUGCCAUGUUGAGAAUAAUCAAUGCUAGGAA	.......((.((((((((((((....))))))))(((((((............)))))))............((.(((((....)))))..))...(((((......))))).)))))).	.......((((.((((((((((....)))))))))).))))..................................(((((....))))).......(((((......)))))........	0.41667
284	403	37	-27	-2.13	0.02	23.6	AAGCCAUCACUGGGCCUUAUCAACAGAUGGGGUUCCGUGGGGAAAAAAGAGGCUAUGGAAAUAAUAAAGAAGUUCAAGAAAGAUCUUGCUGCCAUGUUGAGAAUAAUCAAUGCUAGGAAA	......((.((((((((((((....))))))))(((((((............)))))))............((.(((((....)))))..))...(((((......))))).))))))..	......((((.((((((((((....)))))))))).))))..................................(((((....))))).......(((((......))))).........	0.40833
285	404	37	-27	-1.72	0.06	23.54	AGCCAUCACUGGGCCUUAUCAACAGAUGGGGUUCCGUGGGGAAAAAAGAGGCUAUGGAAAUAAUAAAGAAGUUCAAGAAAGAUCUUGCUGCCAUGUUGAGAAUAAUCAAUGCUAGGAAAG	.....((.((((((((((((....))))))))(((((((............)))))))............((.(((((....)))))..))...(((((......))))).))))))...	...(.((((.((((((((((....)))))))))).))))).................................(((((....))))).......(((((......)))))..........	0.41667
286	405	37	-27	-1.72	0.04	23.97	GCCAUCACUGGGCCUUAUCAACAGAUGGGGUUCCGUGGGGAAAAAAGAGGCUAUGGAAAUAAUAAAGAAGUUCAAGAAAGAUCUUGCUGCCAUGUUGAGAAUAAUCAAUGCUAGGAAAGA	....((.((((((((((((....))))))))(((((((............)))))))............((.(((((....)))))..))...(((((......))))).))))))....	.((..(((.((((((((((....)))))))))).))).))................................(((((....))))).......(((((......)))))...........	0.41667
287	406	37	-27	-2.01	0.01	24.26	CCAUCACUGGGCCUUAUCAACAGAUGGGGUUCCGUGGGGAAAAAAGAGGCUAUGGAAAUAAUAAAGAAGUUCAAGAAAGAUCUUGCUGCCAUGUUGAGAAUAAUCAAUGCUAGGAAAGAG	...((.((((((((((((....))))))))(((((((............)))))))............((.(((((....)))))..))...(((((......))))).)))))).....	((..(((.((((((((((....)))))))))).))).))................................(((((....))))).......(((((......)))))............	0.41667
288	407	37	-27	-2.44	0.02	11.65	CAUCACUGGGCCUUAUCAACAGAUGGGGUUCCGUGGGGAAAAAAGAGGCUAUGGAAAUAAUAAAGAAGUUCAAGAAAGAUCUUGCUGCCAUGUUGAGAAUAAUCAAUGCUAGGAAAGAGA	..((.((((((((((((....))))))))(((((((............)))))))............((.(((((....)))))..))...(((((......))))).))))))......	..((.((((((((((((....))))))))(((((((............)))))))...............(((((....))))).......(((((......))))).))))))......	0.40833
289	408	37	-27	-2.32	0.01	10.56	AUCACUGGGCCUUAUCAACAGAUGGGGUUCCGUGGGGAAAAAAGAGGCUAUGGAAAUAAUAAAGAAGUUCAAGAAAGAUCUUGCUGCCAUGUUGAGAAUAAUCAAUGCUAGGAAAGAGAG	.((.((((((((((((....))))))))(((((((............)))))))............((.(((((....)))))..))...(((((......))))).)))))).......	.((.((((((((((((....))))))))(((((((............)))))))............((.(((((....)))))..))...(((((......))))).)))))).......	0.40833
290	409	37	-27	-2.31	0.01	11.54	UCACUGGGCCUUAUCAACAGAUGGGGUUCCGUGGGGAAAAAAGAGGCUAUGGAAAUAAUAAAGAAGUUCAAGAAAGAUCUUGCUGCCAUGUUGAGAAUAAUCAAUGCUAGGAAAGAGAGG	((.((((((((((((....))))))))(((((((............)))))))............((.(((((....)))))..))...(((((......))))).))))))........	((.((((((((((((....))))))))(((((((............)))))))...............(((((....))))).......(((((......))))).))))))........	0.41667
291	410	37	-26.4	-2.5	0	11.95	CACUGGGCCUUAUCAACAGAUGGGGUUCCGUGGGGAAAAAAGAGGCUAUGGAAAUAAUAAAGAAGUUCAAGAAAGAUCUUGCUGCCAUGUUGAGAAUAAUCAAUGCUAGGAAAGAGAGGA	..((((((((((((....))))))))(((((((............)))))))............((.(((((....)))))..))...(((((......))))).))))...........	..((((((((((((....))))))))(((((((............)))))))...............(((((....))))).......(((((......))))).))))...........	0.41667
292	411	37	-26.4	-2.73	0.02	9.33	ACUGGGCCUUAUCAACAGAUGGGGUUCCGUGGGGAAAAAAGAGGCUAUGGAAAUAAUAAAGAAGUUCAAGAAAGAUCUUGCUGCCAUGUUGAGAAUAAUCAAUGCUAGGAAAGAGAGGAA	.((((((((((((....))))))))(((((((............)))))))............((.(((((....)))))..))...(((((......))))).))))............	.((((((((((((....))))))))(((((((............)))))))...............(((((....))))).......(((((......))))).))))............	0.40833
293	412	37	-26.1	-2.2	0.01	10.4	CUGGGCCUUAUCAACAGAUGGGGUUCCGUGGGGAAAAAAGAGGCUAUGGAAAUAAUAAAGAAGUUCAAGAAAGAUCUUGCUGCCAUGUUGAGAAUAAUCAAUGCUAGGAAAGAGAGGAAG	((((((((((((....))))))))(((((((............)))))))............((.(((((....)))))..))...(((((......))))).)))).............	((((((((((((....))))))))(((((((............)))))))...............(((((....))))).......(((((......))))).)))).............	0.41667
294	413	37	-23.7	-2.02	0.04	15.68	UGGGCCUUAUCAACAGAUGGGGUUCCGUGGGGAAAAAAGAGGCUAUGGAAAUAAUAAAGAAGUUCAAGAAAGAUCUUGCUGCCAUGUUGAGAAUAAUCAAUGCUAGGAAAGAGAGGAAGA	...((((((((....))))))))(((((((............)))))))........................((((....((.((((((......))))))...))...))))......	...((((((((....))))))))(((((((............)))))))....................................(((((......)))))...................	0.40833
295	414	37	-23.7	-2.47	0.01	15.54	GGGCCUUAUCAACAGAUGGGGUUCCGUGGGGAAAAAAGAGGCUAUGGAAAUAAUAAAGAAGUUCAAGAAAGAUCUUGCUGCCAUGUUGAGAAUAAUCAAUGCUAGGAAAGAGAGGAAGAG	..((((((((....))))))))(((((((............)))))))........................((((....((.((((((......))))))...))...)))).......	..((((((((....))))))))(((((((............)))))))....................................(((((......)))))....................	0.41667
296	415	37	-23.7	-2.55	0.01	15.19	GGCCUUAUCAACAGAUGGGGUUCCGUGGGGAAAAAAGAGGCUAUGGAAAUAAUAAAGAAGUUCAAGAAAGAUCUUGCUGCCAUGUUGAGAAUAAUCAAUGCUAGGAAAGAGAGGAAGAGA	.((((((((....))))))))(((((((............)))))))........................((((....((.((((((......))))))...))...))))........	.((((((((....))))))))(((((((............)))))))....................................(((((......))))).....................	0.40833
297	416	37	-23.1	-1.71	0.03	15.58	GCCUUAUCAACAGAUGGGGUUCCGUGGGGAAAAAAGAGGCUAUGGAAAUAAUAAAGAAGUUCAAGAAAGAUCUUGCUGCCAUGUUGAGAAUAAUCAAUGCUAGGAAAGAGAGGAAGAGAC	((((((((....))))))))(((((((............)))))))........................((((....((.((((((......))))))...))...)))).........	((((((((....))))))))(((((((............)))))))....................................(((((......)))))......................	0.40833
298	417	37	-22.3	-1.45	0.08	15.8	CCUUAUCAACAGAUGGGGUUCCGUGGGGAAAAAAGAGGCUAUGGAAAUAAUAAAGAAGUUCAAGAAAGAUCUUGCUGCCAUGUUGAGAAUAAUCAAUGCUAGGAAAGAGAGGAAGAGACG	(((((((....)))))))((((((((............)))))))).......................((((....((.((((((......))))))...))...))))..........	(((((((....)))))))((((((((............))))))))...................................(((((......))))).......................	0.40833
299	418	37	-19.7	-0.94	0.12	17.51	CUUAUCAACAGAUGGGGUUCCGUGGGGAAAAAAGAGGCUAUGGAAAUAAUAAAGAAGUUCAAGAAAGAUCUUGCUGCCAUGUUGAGAAUAAUCAAUGCUAGGAAAGAGAGGAAGAGACGU	((((((....)))))).((((((((............)))))))).......................((((....((.((((((......))))))...))...))))...........	((((((....)))))).((((((((............))))))))...................................(((((......)))))........................	0.4
300	419	37	-17.7	-0.54	0.28	23.77	UUAUCAACAGAUGGGGUUCCGUGGGGAAAAAAGAGGCUAUGGAAAUAAUAAAGAAGUUCAAGAAAGAUCUUGCUGCCAUGUUGAGAAUAAUCAAUGCUAGGAAAGAGAGGAAGAGACGUG	...((((((..(((.(((((((((............))))))))..............(((((....))))).).)))))))))....................................	...(((((...(((..((((((((............))))))))..............(((((....)))))...))).)))))....................................	0.4
301	420	37	-18.4	-1	0.14	22.24	UAUCAACAGAUGGGGUUCCGUGGGGAAAAAAGAGGCUAUGGAAAUAAUAAAGAAGUUCAAGAAAGAUCUUGCUGCCAUGUUGAGAAUAAUCAAUGCUAGGAAAGAGAGGAAGAGACGUGG	((((....))))...((((((((............))))))))..............(((((....)))))...(((((((........((............))........)))))))	...............((((((((............))))))))..............(((((....)))))...(((((((................................)))))))	0.40833
302	421	37	-20.9	-1.47	0.08	15.52	AUCAACAGAUGGGGUUCCGUGGGGAAAAAAGAGGCUAUGGAAAUAAUAAAGAAGUUCAAGAAAGAUCUUGCUGCCAUGUUGAGAAUAAUCAAUGCUAGGAAAGAGAGGAAGAGACGUGGC	..............((((((((............))))))))..............(((((....)))))..((((((((........((............))........))))))))	..............((((((((............))))))))..............(((((....)))))..((((((((........((............))........))))))))	0.41667
303	422	37	-22.4	-2.2	0.02	16.23	UCAACAGAUGGGGUUCCGUGGGGAAAAAAGAGGCUAUGGAAAUAAUAAAGAAGUUCAAGAAAGAUCUUGCUGCCAUGUUGAGAAUAAUCAAUGCUAGGAAAGAGAGGAAGAGACGUGGCG	.............((((((((............))))))))..............(((((....)))))..((((((((........((............))........)))))))).	.............((((((((............))))))))..............(((((....)))))..((((((((........((............))........)))))))).	0.425
304	423	37	-22.5	-1.83	0.04	12.18	CAACAGAUGGGGUUCCGUGGGGAAAAAAGAGGCUAUGGAAAUAAUAAAGAAGUUCAAGAAAGAUCUUGCUGCCAUGUUGAGAAUAAUCAAUGCUAGGAAAGAGAGGAAGAGACGUGGCGC	............((((((((............))))))))..............(((((....))))).(((((((((........((............))........))))))))).	............((((((((............))))))))..............(((((....)))))..((((((((........((............))........))))))))..	0.43333
305	424	37	-23.1	-1.61	0.06	13.15	AACAGAUGGGGUUCCGUGGGGAAAAAAGAGGCUAUGGAAAUAAUAAAGAAGUUCAAGAAAGAUCUUGCUGCCAUGUUGAGAAUAAUCAAUGCUAGGAAAGAGAGGAAGAGACGUGGCGCA	...........((((((((............)))))))).........(((.((......)).)))((.((((((((........((............))........)))))))))).	...........((((((((............))))))))...........................((.((((((((........((............))........)))))))))).	0.425
306	425	37	-23.1	-2.04	0.03	12.56	ACAGAUGGGGUUCCGUGGGGAAAAAAGAGGCUAUGGAAAUAAUAAAGAAGUUCAAGAAAGAUCUUGCUGCCAUGUUGAGAAUAAUCAAUGCUAGGAAAGAGAGGAAGAGACGUGGCGCAG	..........((((((((............)))))))).........(((.((......)).)))((.((((((((........((............))........))))))))))..	..........((((((((............))))))))...........................((.((((((((........((............))........))))))))))..	0.43333
307	426	37	-23.4	-2.46	0.03	12	CAGAUGGGGUUCCGUGGGGAAAAAAGAGGCUAUGGAAAUAAUAAAGAAGUUCAAGAAAGAUCUUGCUGCCAUGUUGAGAAUAAUCAAUGCUAGGAAAGAGAGGAAGAGACGUGGCGCAGA	.........((((((((............)))))))).........................((((.((((((((........((............))........)))))))))))).	.........((((((((............))))))))..........................(((.((((((((........((............))........)))))))))))..	0.43333
308	427	37	-23.4	-2.15	0.01	11.86	AGAUGGGGUUCCGUGGGGAAAAAAGAGGCUAUGGAAAUAAUAAAGAAGUUCAAGAAAGAUCUUGCUGCCAUGUUGAGAAUAAUCAAUGCUAGGAAAGAGAGGAAGAGACGUGGCGCAGAC	........((((((((............)))))))).........................((((.((((((((........((............))........))))))))))))..	........((((((((............))))))))..........................(((.((((((((........((............))........)))))))))))...	0.43333
309	428	37	-23.4	-2.2	0.02	12.12	GAUGGGGUUCCGUGGGGAAAAAAGAGGCUAUGGAAAUAAUAAAGAAGUUCAAGAAAGAUCUUGCUGCCAUGUUGAGAAUAAUCAAUGCUAGGAAAGAGAGGAAGAGACGUGGCGCAGACA	.......((((((((............)))))))).........................((((.((((((((........((............))........))))))))))))...	.......((((((((............))))))))..........................(((.((((((((........((............))........)))))))))))....	0.43333
310	429	37	-23.4	-2.1	0.04	11.98	AUGGGGUUCCGUGGGGAAAAAAGAGGCUAUGGAAAUAAUAAAGAAGUUCAAGAAAGAUCUUGCUGCCAUGUUGAGAAUAAUCAAUGCUAGGAAAGAGAGGAAGAGACGUGGCGCAGACAC	......((((((((............)))))))).........................((((.((((((((........((............))........))))))))))))....	......((((((((............))))))))..........................(((.((((((((........((............))........))))))))))).....	0.43333
311	430	37	-23.4	-1.71	0.07	14.14	UGGGGUUCCGUGGGGAAAAAAGAGGCUAUGGAAAUAAUAAAGAAGUUCAAGAAAGAUCUUGCUGCCAUGUUGAGAAUAAUCAAUGCUAGGAAAGAGAGGAAGAGACGUGGCGCAGACACC	.....((((((((............)))))))).........................((((.((((((((........((............))........)))))))))))).....	.....((((((((............))))))))...........................((.((((((((........((............))........)))))))))).......	0.44167
312	431	37	-24	-1.79	0.03	15.72	GGGGUUCCGUGGGGAAAAAAGAGGCUAUGGAAAUAAUAAAGAAGUUCAAGAAAGAUCUUGCUGCCAUGUUGAGAAUAAUCAAUGCUAGGAAAGAGAGGAAGAGACGUGGCGCAGACACCA	((..((((((((............)))))))).........(((.((......)).)))((.((((((((........((............))........)))))))))).....)).	(....(((((((............)))))))............................((.((((((((........((............))........))))))))))......).	0.44167
313	432	37	-24	-2.03	0.01	14.97	GGGUUCCGUGGGGAAAAAAGAGGCUAUGGAAAUAAUAAAGAAGUUCAAGAAAGAUCUUGCUGCCAUGUUGAGAAUAAUCAAUGCUAGGAAAGAGAGGAAGAGACGUGGCGCAGACACCAG	((.((((((((............)))))))).........(((.((......)).)))((.((((((((........((............))........)))))))))).....))..	((..(((((((............)))))))............................((.((((((((........((............))........)))))))))).....))..	0.44167
314	433	37	-24	-1.64	0.06	13.27	GGUUCCGUGGGGAAAAAAGAGGCUAUGGAAAUAAUAAAGAAGUUCAAGAAAGAUCUUGCUGCCAUGUUGAGAAUAAUCAAUGCUAGGAAAGAGAGGAAGAGACGUGGCGCAGACACCAGC	((((((((((............)))))))..........(((.((......)).)))((.((((((((........((............))........))))))))))....)))...	((.(((((((............)))))))............................((.((((((((........((............))........)))))))))).....))...	0.44167
315	434	37	-23.4	-1.89	0.03	13.24	GUUCCGUGGGGAAAAAAGAGGCUAUGGAAAUAAUAAAGAAGUUCAAGAAAGAUCUUGCUGCCAUGUUGAGAAUAAUCAAUGCUAGGAAAGAGAGGAAGAGACGUGGCGCAGACACCAGCA	.((((((((............)))))))).........................((((.((((((((........((............))........)))))))))))).........	.((((((((............))))))))...........................((.((((((((........((............))........))))))))))...........	0.43333
316	435	37	-23.4	-1.62	0.05	12.95	UUCCGUGGGGAAAAAAGAGGCUAUGGAAAUAAUAAAGAAGUUCAAGAAAGAUCUUGCUGCCAUGUUGAGAAUAAUCAAUGCUAGGAAAGAGAGGAAGAGACGUGGCGCAGACACCAGCAU	((((((((............)))))))).........................((((.((((((((........((............))........))))))))))))..........	((((((((............))))))))...........................((.((((((((........((............))........))))))))))............	0.425
317	436	37	-22.5	-1.27	0.12	13.13	UCCGUGGGGAAAAAAGAGGCUAUGGAAAUAAUAAAGAAGUUCAAGAAAGAUCUUGCUGCCAUGUUGAGAAUAAUCAAUGCUAGGAAAGAGAGGAAGAGACGUGGCGCAGACACCAGCAUC	(((((((............)))))))..........................((((.((((((((........((............))........))))))))))))...........	(((((((............)))))))............................((.((((((((........((............))........)))))))))).............	0.43333
318	437	37	-20.9	-0.82	0.18	14.82	CCGUGGGGAAAAAAGAGGCUAUGGAAAUAAUAAAGAAGUUCAAGAAAGAUCUUGCUGCCAUGUUGAGAAUAAUCAAUGCUAGGAAAGAGAGGAAGAGACGUGGCGCAGACACCAGCAUCG	((((((............))))))...........................((((.((((((((........((............))........))))))))))))............	((((((............)))))).............................((.((((((((........((............))........))))))))))..............	0.44167
319	438	37	-17.8	0.02	0.46	21.61	CGUGGGGAAAAAAGAGGCUAUGGAAAUAAUAAAGAAGUUCAAGAAAGAUCUUGCUGCCAUGUUGAGAAUAAUCAAUGCUAGGAAAGAGAGGAAGAGACGUGGCGCAGACACCAGCAUCGG	(((((............)))))............................((((.((((((((........((............))........)))))))))))).............	....................................................((.((((((((........((............))........))))))))))...............	0.44167
320	439	37	-17.4	-0.12	0.45	21.14	GUGGGGAAAAAAGAGGCUAUGGAAAUAAUAAAGAAGUUCAAGAAAGAUCUUGCUGCCAUGUUGAGAAUAAUCAAUGCUAGGAAAGAGAGGAAGAGACGUGGCGCAGACACCAGCAUCGGA	............((.(((..((...........(((.((......)).)))((.((((((((........((............))........)))))))))).....))))).))...	...............((..................................((.((((((((........((............))........))))))))))........))......	0.43333
321	440	37	-17.4	-0.49	0.3	18.24	UGGGGAAAAAAGAGGCUAUGGAAAUAAUAAAGAAGUUCAAGAAAGAUCUUGCUGCCAUGUUGAGAAUAAUCAAUGCUAGGAAAGAGAGGAAGAGACGUGGCGCAGACACCAGCAUCGGAA	...........((.(((..((...........(((.((......)).)))((.((((((((........((............))........)))))))))).....))))).))....	...........((.((...((.............................((.((((((((........((............))........)))))))))).....)).)).))....	0.425
322	441	37	-17.4	-0.45	0.32	17.04	GGGGAAAAAAGAGGCUAUGGAAAUAAUAAAGAAGUUCAAGAAAGAUCUUGCUGCCAUGUUGAGAAUAAUCAAUGCUAGGAAAGAGAGGAAGAGACGUGGCGCAGACACCAGCAUCGGAAU	..........((.(((..((...........(((.((......)).)))((.((((((((........((............))........)))))))))).....))))).)).....	..........((.((...((.............................((.((((((((........((............))........)))))))))).....)).)).)).....	0.425
323	442	37	-17.4	-0.32	0.38	17.2	GGGAAAAAAGAGGCUAUGGAAAUAAUAAAGAAGUUCAAGAAAGAUCUUGCUGCCAUGUUGAGAAUAAUCAAUGCUAGGAAAGAGAGGAAGAGACGUGGCGCAGACACCAGCAUCGGAAUC	.........((.(((..((...........(((.((......)).)))((.((((((((........((............))........)))))))))).....))))).))......	.........((.((...((.............................((.((((((((........((............))........)))))))))).....)).)).))......	0.425
324	443	37	-17.4	-0.34	0.36	18.74	GGAAAAAAGAGGCUAUGGAAAUAAUAAAGAAGUUCAAGAAAGAUCUUGCUGCCAUGUUGAGAAUAAUCAAUGCUAGGAAAGAGAGGAAGAGACGUGGCGCAGACACCAGCAUCGGAAUCA	........((.(((..((...........(((.((......)).)))((.((((((((........((............))........)))))))))).....))))).)).......	........((.((...((.............................((.((((((((........((............))........)))))))))).....)).)).)).......	0.41667
325	444	37	-17.4	-0.8	0.17	18.42	GAAAAAAGAGGCUAUGGAAAUAAUAAAGAAGUUCAAGAAAGAUCUUGCUGCCAUGUUGAGAAUAAUCAAUGCUAGGAAAGAGAGGAAGAGACGUGGCGCAGACACCAGCAUCGGAAUCAU	.......((.(((..((...........(((.((......)).)))((.((((((((........((............))........)))))))))).....))))).))........	.......((.((...((.............................((.((((((((........((............))........)))))))))).....)).)).))........	0.40833
326	445	37	-17.4	-0.57	0.29	18.95	AAAAAAGAGGCUAUGGAAAUAAUAAAGAAGUUCAAGAAAGAUCUUGCUGCCAUGUUGAGAAUAAUCAAUGCUAGGAAAGAGAGGAAGAGACGUGGCGCAGACACCAGCAUCGGAAUCAUU	......((.(((..((...........(((.((......)).)))((.((((((((........((............))........)))))))))).....))))).)).........	......((.((...((.............................((.((((((((........((............))........)))))))))).....)).)).)).........	0.4
327	446	37	-17.4	-0.05	0.45	19.28	AAAAAGAGGCUAUGGAAAUAAUAAAGAAGUUCAAGAAAGAUCUUGCUGCCAUGUUGAGAAUAAUCAAUGCUAGGAAAGAGAGGAAGAGACGUGGCGCAGACACCAGCAUCGGAAUCAUUG	.....((.(((..((...........(((.((......)).)))((.((((((((........((............))........)))))))))).....))))).))..........	.....((.((...((.............................((.((((((((........((............))........)))))))))).....)).)).))..........	0.40833
328	447	37	-17.4	0.16	0.48	19.97	AAAAGAGGCUAUGGAAAUAAUAAAGAAGUUCAAGAAAGAUCUUGCUGCCAUGUUGAGAAUAAUCAAUGCUAGGAAAGAGAGGAAGAGACGUGGCGCAGACACCAGCAUCGGAAUCAUUGG	....((.(((..((...........(((.((......)).)))((.((((((((........((............))........)))))))))).....))))).))...........	....((.((...((.............................((.((((((((........((............))........)))))))))).....)).)).))...........	0.41667
329	448	37	-18.8	-0.11	0.39	19.16	AAAGAGGCUAUGGAAAUAAUAAAGAAGUUCAAGAAAGAUCUUGCUGCCAUGUUGAGAAUAAUCAAUGCUAGGAAAGAGAGGAAGAGACGUGGCGCAGACACCAGCAUCGGAAUCAUUGGC	......((((..((..........(((.((......)).)))((.((((((((........((............))........)))))))))).....((......))..))..))))	......((((..((............................((.((((((((........((............))........)))))))))).....((......))..))..))))	0.425
330	449	37	-22.3	-0.98	0.17	15.73	AAGAGGCUAUGGAAAUAAUAAAGAAGUUCAAGAAAGAUCUUGCUGCCAUGUUGAGAAUAAUCAAUGCUAGGAAAGAGAGGAAGAGACGUGGCGCAGACACCAGCAUCGGAAUCAUUGGCC	....(((((..((..........(((.((......)).)))((.((((((((........((............))........)))))))))).....((......))..))..)))))	....(((((..((............................((.((((((((........((............))........)))))))))).....((......))..))..)))))	0.43333
331	450	37	-24.1	-1.04	0.14	15.96	AGAGGCUAUGGAAAUAAUAAAGAAGUUCAAGAAAGAUCUUGCUGCCAUGUUGAGAAUAAUCAAUGCUAGGAAAGAGAGGAAGAGACGUGGCGCAGACACCAGCAUCGGAAUCAUUGGCCU	..((((((..((..........(((.((......)).)))((.((((((((........((............))........)))))))))).....((......))..))..))))))	..((((((..((............................((.((((((((........((............))........)))))))))).....((......))..))..))))))	0.43333
332	451	37	-26.6	-1.3	0.11	15.74	GAGGCUAUGGAAAUAAUAAAGAAGUUCAAGAAAGAUCUUGCUGCCAUGUUGAGAAUAAUCAAUGCUAGGAAAGAGAGGAAGAGACGUGGCGCAGACACCAGCAUCGGAAUCAUUGGCCUC	(((((((..((..........(((.((......)).)))((.((((((((........((............))........)))))))))).....((......))..))..)))))))	(((((((..((............................((.((((((((........((............))........)))))))))).....((......))..))..)))))))	0.44167
333	452	37	-23.8	-0.64	0.22	16.05	AGGCUAUGGAAAUAAUAAAGAAGUUCAAGAAAGAUCUUGCUGCCAUGUUGAGAAUAAUCAAUGCUAGGAAAGAGAGGAAGAGACGUGGCGCAGACACCAGCAUCGGAAUCAUUGGCCUCC	((((((..((..........(((.((......)).)))((.((((((((........((............))........)))))))))).....((......))..))..))))))..	((((((..((............................((.((((((((........((............))........)))))))))).....((......))..))..))))))..	0.44167
334	453	37	-23.3	-0.26	0.32	15.72	GGCUAUGGAAAUAAUAAAGAAGUUCAAGAAAGAUCUUGCUGCCAUGUUGAGAAUAAUCAAUGCUAGGAAAGAGAGGAAGAGACGUGGCGCAGACACCAGCAUCGGAAUCAUUGGCCUCCU	(((((..((..........(((.((......)).)))((.((((((((........((............))........)))))))))).....((......))..))..)))))....	(((((..((............................((.((((((((........((............))........)))))))))).....((......))..))..)))))....	0.44167
335	454	37	-19.6	0.77	0.8	23.96	GCUAUGGAAAUAAUAAAGAAGUUCAAGAAAGAUCUUGCUGCCAUGUUGAGAAUAAUCAAUGCUAGGAAAGAGAGGAAGAGACGUGGCGCAGACACCAGCAUCGGAAUCAUUGGCCUCCUG	((((..((..........(((.((......)).)))((.((((((((........((............))........)))))))))).....((......))..))..))))......	((((..(.............................((.((((((((........((............))........)))))))))).....((......))...)..))))......	0.44167
336	455	37	-18.8	0.88	0.8	31.24	CUAUGGAAAUAAUAAAGAAGUUCAAGAAAGAUCUUGCUGCCAUGUUGAGAAUAAUCAAUGCUAGGAAAGAGAGGAAGAGACGUGGCGCAGACACCAGCAUCGGAAUCAUUGGCCUCCUGC	......................(((((....)))))..((((((((........((............))........))))))))((((...((((...........))))....))))	........................((......))....((((((((........((............))........))))))))..................................	0.44167
337	456	37	-19.9	0.7	0.7	25.5	UAUGGAAAUAAUAAAGAAGUUCAAGAAAGAUCUUGCUGCCAUGUUGAGAAUAAUCAAUGCUAGGAAAGAGAGGAAGAGACGUGGCGCAGACACCAGCAUCGGAAUCAUUGGCCUCCUGCU	.....................(((((....)))))..((((((((........((............))........))))))))((((...((((...........))))....)))).	.....................................((((((((........((............))........))))))))...................................	0.43333
338	457	37	-21.5	0.16	0.54	13.96	AUGGAAAUAAUAAAGAAGUUCAAGAAAGAUCUUGCUGCCAUGUUGAGAAUAAUCAAUGCUAGGAAAGAGAGGAAGAGACGUGGCGCAGACACCAGCAUCGGAAUCAUUGGCCUCCUGCUG	...............................((((.((((((((........((............))........))))))))))))....(((((..(((..........))))))))	................................(((.((((((((........((............))........))))))))))).....(((((..(((..........))))))))	0.44167
339	458	37	-22.7	-0.22	0.37	12.66	UGGAAAUAAUAAAGAAGUUCAAGAAAGAUCUUGCUGCCAUGUUGAGAAUAAUCAAUGCUAGGAAAGAGAGGAAGAGACGUGGCGCAGACACCAGCAUCGGAAUCAUUGGCCUCCUGCUGA	..............................((((.((((((((........((............))........))))))))))))....(((((..(((..........)))))))).	...............................(((.((((((((........((............))........))))))))))).....(((((..(((..........)))))))).	0.44167
340	459	37	-22.7	-0.01	0.45	12.29	GGAAAUAAUAAAGAAGUUCAAGAAAGAUCUUGCUGCCAUGUUGAGAAUAAUCAAUGCUAGGAAAGAGAGGAAGAGACGUGGCGCAGACACCAGCAUCGGAAUCAUUGGCCUCCUGCUGAC	.............................((((.((((((((........((............))........))))))))))))....(((((..(((..........))))))))..	..............................(((.((((((((........((............))........))))))))))).....(((((..(((..........))))))))..	0.45
341	460	37	-22.7	-0.14	0.37	12.55	GAAAUAAUAAAGAAGUUCAAGAAAGAUCUUGCUGCCAUGUUGAGAAUAAUCAAUGCUAGGAAAGAGAGGAAGAGACGUGGCGCAGACACCAGCAUCGGAAUCAUUGGCCUCCUGCUGACU	............................((((.((((((((........((............))........))))))))))))....(((((..(((..........))))))))...	.............................(((.((((((((........((............))........))))))))))).....(((((..(((..........))))))))...	0.44167
342	461	37	-22.7	-0.15	0.39	12.81	AAAUAAUAAAGAAGUUCAAGAAAGAUCUUGCUGCCAUGUUGAGAAUAAUCAAUGCUAGGAAAGAGAGGAAGAGACGUGGCGCAGACACCAGCAUCGGAAUCAUUGGCCUCCUGCUGACUA	...........................((((.((((((((........((............))........))))))))))))....(((((..(((..........))))))))....	............................(((.((((((((........((............))........))))))))))).....(((((..(((..........))))))))....	0.43333
343	462	37	-22.7	-0.12	0.43	12.9	AAUAAUAAAGAAGUUCAAGAAAGAUCUUGCUGCCAUGUUGAGAAUAAUCAAUGCUAGGAAAGAGAGGAAGAGACGUGGCGCAGACACCAGCAUCGGAAUCAUUGGCCUCCUGCUGACUAC	..........................((((.((((((((........((............))........))))))))))))....(((((..(((..........)))))))).....	...........................(((.((((((((........((............))........))))))))))).....(((((..(((..........)))))))).....	0.44167
344	463	37	-22.7	-0.18	0.37	13.39	AUAAUAAAGAAGUUCAAGAAAGAUCUUGCUGCCAUGUUGAGAAUAAUCAAUGCUAGGAAAGAGAGGAAGAGACGUGGCGCAGACACCAGCAUCGGAAUCAUUGGCCUCCUGCUGACUACA	.........................((((.((((((((........((............))........))))))))))))....(((((..(((..........))))))))......	..........................(((.((((((((........((............))........))))))))))).....(((((..(((..........))))))))......	0.44167
345	464	37	-22.7	0.14	0.5	13.43	UAAUAAAGAAGUUCAAGAAAGAUCUUGCUGCCAUGUUGAGAAUAAUCAAUGCUAGGAAAGAGAGGAAGAGACGUGGCGCAGACACCAGCAUCGGAAUCAUUGGCCUCCUGCUGACUACAG	........................((((.((((((((........((............))........))))))))))))....(((((..(((..........)))))))).......	.........................(((.((((((((........((............))........))))))))))).....(((((..(((..........)))))))).......	0.45
346	465	37	-22.7	0.02	0.47	16.95	AAUAAAGAAGUUCAAGAAAGAUCUUGCUGCCAUGUUGAGAAUAAUCAAUGCUAGGAAAGAGAGGAAGAGACGUGGCGCAGACACCAGCAUCGGAAUCAUUGGCCUCCUGCUGACUACAGC	.......................((((.((((((((........((............))........))))))))))))....(((((..(((..........))))))))........	.........................((.((((((((........((............))........))))))))))......(((((..(((..........))))))))........	0.45833
347	466	37	-22.7	0.31	0.59	22.65	AUAAAGAAGUUCAAGAAAGAUCUUGCUGCCAUGUUGAGAAUAAUCAAUGCUAGGAAAGAGAGGAAGAGACGUGGCGCAGACACCAGCAUCGGAAUCAUUGGCCUCCUGCUGACUACAGCC	......................((((.((((((((........((............))........))))))))))))....(((((..(((..........)))))))).........	........................((.((((((((........((............))........))))))))))......(((((..(((..........)))))))).........	0.46667
348	467	37	-22.7	0.43	0.59	23.07	UAAAGAAGUUCAAGAAAGAUCUUGCUGCCAUGUUGAGAAUAAUCAAUGCUAGGAAAGAGAGGAAGAGACGUGGCGCAGACACCAGCAUCGGAAUCAUUGGCCUCCUGCUGACUACAGCCA	.....................((((.((((((((........((............))........))))))))))))....(((((..(((..........))))))))..........	.......................((.((((((((........((............))........))))))))))......(((((..(((..........))))))))..........	0.46667
349	468	37	-22.7	0.49	0.66	23.9	AAAGAAGUUCAAGAAAGAUCUUGCUGCCAUGUUGAGAAUAAUCAAUGCUAGGAAAGAGAGGAAGAGACGUGGCGCAGACACCAGCAUCGGAAUCAUUGGCCUCCUGCUGACUACAGCCAU	....................((((.((((((((........((............))........))))))))))))....(((((..(((..........))))))))...........	......................((.((((((((........((............))........))))))))))......(((((..(((..........))))))))...........	0.46667
350	469	37	-22.7	0.8	0.79	29.85	AAGAAGUUCAAGAAAGAUCUUGCUGCCAUGUUGAGAAUAAUCAAUGCUAGGAAAGAGAGGAAGAGACGUGGCGCAGACACCAGCAUCGGAAUCAUUGGCCUCCUGCUGACUACAGCCAUG	...................((((.((((((((........((............))........))))))))))))....(((((..(((..........))))))))............	........................((((((((................................))))))))........(((((..(((..........))))))))............	0.475
351	470	37	-23.3	0.81	0.76	31.52	AGAAGUUCAAGAAAGAUCUUGCUGCCAUGUUGAGAAUAAUCAAUGCUAGGAAAGAGAGGAAGAGACGUGGCGCAGACACCAGCAUCGGAAUCAUUGGCCUCCUGCUGACUACAGCCAUGG	................((((....((.((((((......))))))...))...))))........((((((........(((((..(((..........))))))))......)))))).	............................(((((......))))).....................((((((........(((((..(((..........))))))))......)))))).	0.48333
352	471	37	-26.3	0.16	0.51	23.78	GAAGUUCAAGAAAGAUCUUGCUGCCAUGUUGAGAAUAAUCAAUGCUAGGAAAGAGAGGAAGAGACGUGGCGCAGACACCAGCAUCGGAAUCAUUGGCCUCCUGCUGACUACAGCCAUGGC	......(((((....)))))..((((((((((......)))).........((.((((..((((..(((.((........)).)))...)).))..))))))((((....))))))))))	......(((((....)))))..((((((((((......)))).........((.((((..(((...(((.((........)).)))....).))..))))))((((....))))))))))	0.49167
353	472	37	-28	-0.67	0.2	16.85	AAGUUCAAGAAAGAUCUUGCUGCCAUGUUGAGAAUAAUCAAUGCUAGGAAAGAGAGGAAGAGACGUGGCGCAGACACCAGCAUCGGAAUCAUUGGCCUCCUGCUGACUACAGCCAUGGCA	.....(((((....))))).(((((((((((......)))).........((.((((..((((..(((.((........)).)))...)).))..))))))((((....)))))))))))	.....(((((....)))))..((((((((((......)))).........((.((((..((((..(((.((........)).)))...)).))..))))))((((....)))))))))).	0.48333
354	473	37	-30.7	-0.8	0.18	13.08	AGUUCAAGAAAGAUCUUGCUGCCAUGUUGAGAAUAAUCAAUGCUAGGAAAGAGAGGAAGAGACGUGGCGCAGACACCAGCAUCGGAAUCAUUGGCCUCCUGCUGACUACAGCCAUGGCAG	....(((((....)))))((((((((((((......)))).........((.((((..((((..(((.((........)).)))...)).))..))))))((((....))))))))))))	....(((((....)))))((((((((((((......)))).........((.((((..((((..(((.((........)).)))...)).))..))))))((((....))))))))))))	0.49167
355	474	37	-31.6	-1.12	0.12	15.06	GUUCAAGAAAGAUCUUGCUGCCAUGUUGAGAAUAAUCAAUGCUAGGAAAGAGAGGAAGAGACGUGGCGCAGACACCAGCAUCGGAAUCAUUGGCCUCCUGCUGACUACAGCCAUGGCAGC	...(((((....)))))((((((((((((......)))).........((.((((..((((..(((.((........)).)))...)).))..))))))((((....)))))))))))).	....((((....))))(((((((((((((......)))).........((.((((..((((..(((.((........)).)))...)).))..))))))((((....)))))))))))))	0.5
356	475	37	-33.1	-1.71	0.06	15.09	UUCAAGAAAGAUCUUGCUGCCAUGUUGAGAAUAAUCAAUGCUAGGAAAGAGAGGAAGAGACGUGGCGCAGACACCAGCAUCGGAAUCAUUGGCCUCCUGCUGACUACAGCCAUGGCAGCA	...((((....))))(((((((((((((......)))).........((.((((..((((..(((.((........)).)))...)).))..))))))((((....))))))))))))).	....((......)).(((((((((((((......)))).........((.((((..((((..(((.((........)).)))...)).))..))))))((((....))))))))))))).	0.49167
357	476	37	-33.8	-1.73	0.03	14.9	UCAAGAAAGAUCUUGCUGCCAUGUUGAGAAUAAUCAAUGCUAGGAAAGAGAGGAAGAGACGUGGCGCAGACACCAGCAUCGGAAUCAUUGGCCUCCUGCUGACUACAGCCAUGGCAGCAG	.............((((((((((((((......)))).........((.((((..((((..(((.((........)).)))...)).))..))))))((((....)))))))))))))).	.............((((((((((((((......)))).........((.((((..((((..(((.((........)).)))...)).))..))))))((((....)))))))))))))).	0.5
358	477	37	-34.4	-1.91	0.02	15.12	CAAGAAAGAUCUUGCUGCCAUGUUGAGAAUAAUCAAUGCUAGGAAAGAGAGGAAGAGACGUGGCGCAGACACCAGCAUCGGAAUCAUUGGCCUCCUGCUGACUACAGCCAUGGCAGCAGA	...........(((((((((((((((......)))).........((.((((..((((..(((.((........)).)))...)).))..))))))((((....))))))))))))))).	............((((((((((((((......)))).........((.((((..((((..(((.((........)).)))...)).))..))))))((((....))))))))))))))..	0.5
359	478	37	-34.4	-2.13	0.01	15.19	AAGAAAGAUCUUGCUGCCAUGUUGAGAAUAAUCAAUGCUAGGAAAGAGAGGAAGAGACGUGGCGCAGACACCAGCAUCGGAAUCAUUGGCCUCCUGCUGACUACAGCCAUGGCAGCAGAG	..........(((((((((((((((......)))).........((.((((..((((..(((.((........)).)))...)).))..))))))((((....)))))))))))))))..	...........((((((((((((((......)))).........((.((((..((((..(((.((........)).)))...)).))..))))))((((....))))))))))))))...	0.5
360	479	37	-34.7	-2.04	0.06	15.83	AGAAAGAUCUUGCUGCCAUGUUGAGAAUAAUCAAUGCUAGGAAAGAGAGGAAGAGACGUGGCGCAGACACCAGCAUCGGAAUCAUUGGCCUCCUGCUGACUACAGCCAUGGCAGCAGAGA	.......(((((((((((((((((......)))).........((.((((..((((..(((.((........)).)))...)).))..))))))((((....)))))))))))))).)))	........(.((((((((((((((......)))).........((.((((..((((..(((.((........)).)))...)).))..))))))((((....))))))))))))))..).	0.5
361	480	37	-35.9	-2.24	0.02	15.14	GAAAGAUCUUGCUGCCAUGUUGAGAAUAAUCAAUGCUAGGAAAGAGAGGAAGAGACGUGGCGCAGACACCAGCAUCGGAAUCAUUGGCCUCCUGCUGACUACAGCCAUGGCAGCAGAGAU	.....((((((((((((((((((......)))).........((.((((..((((..(((.((........)).)))...)).))..))))))((((....)))))))))))))).))))	.....((((((((((((((((((......)))).........((.((((..((((..(((.((........)).)))...)).))..))))))((((....)))))))))))))).))))	0.5
362	481	37	-38.6	-3.09	0	13.99	AAAGAUCUUGCUGCCAUGUUGAGAAUAAUCAAUGCUAGGAAAGAGAGGAAGAGACGUGGCGCAGACACCAGCAUCGGAAUCAUUGGCCUCCUGCUGACUACAGCCAUGGCAGCAGAGAUC	...(((((((((((((((((((......)))).........((.((((..((((..(((.((........)).)))...)).))..))))))((((....)))))))))))))).)))))	...(((((((((((((((((((......)))).........((.((((..((((..(((.((........)).)))...)).))..))))))((((....)))))))))))))).)))))	0.5
363	482	37	-39.9	-3.45	0	13.93	AAGAUCUUGCUGCCAUGUUGAGAAUAAUCAAUGCUAGGAAAGAGAGGAAGAGACGUGGCGCAGACACCAGCAUCGGAAUCAUUGGCCUCCUGCUGACUACAGCCAUGGCAGCAGAGAUCA	..(((((((((((((((((((......)))).........((.((((..((((..(((.((........)).)))...)).))..))))))((((....)))))))))))))).))))).	..(((((((((((((((((((......)))).........((.((((..((((..(((.((........)).)))...)).))..))))))((((....)))))))))))))).))))).	0.5
364	483	37	-39.9	-3.17	0	13.93	AGAUCUUGCUGCCAUGUUGAGAAUAAUCAAUGCUAGGAAAGAGAGGAAGAGACGUGGCGCAGACACCAGCAUCGGAAUCAUUGGCCUCCUGCUGACUACAGCCAUGGCAGCAGAGAUCAC	.(((((((((((((((((((......)))).........((.((((..((((..(((.((........)).)))...)).))..))))))((((....)))))))))))))).)))))..	.(((((((((((((((((((......)))).........((.((((..((((..(((.((........)).)))...)).))..))))))((((....)))))))))))))).)))))..	0.50833
365	484	37	-40.1	-2.65	0	13.92	GAUCUUGCUGCCAUGUUGAGAAUAAUCAAUGCUAGGAAAGAGAGGAAGAGACGUGGCGCAGACACCAGCAUCGGAAUCAUUGGCCUCCUGCUGACUACAGCCAUGGCAGCAGAGAUCACU	(((((((((((((((((((......)))).........((.((((..((((..(((.((........)).)))...)).))..))))))((((....)))))))))))))).)))))...	(((((((((((((((((((......)))).........((.((((..((((..(((.((........)).)))...)).))..))))))((((....)))))))))))))).)))))...	0.50833
366	485	37	-35.6	-2.38	0.02	15.3	AUCUUGCUGCCAUGUUGAGAAUAAUCAAUGCUAGGAAAGAGAGGAAGAGACGUGGCGCAGACACCAGCAUCGGAAUCAUUGGCCUCCUGCUGACUACAGCCAUGGCAGCAGAGAUCACUA	((((((((((((((((((......)))).........((.((((..((((..(((.((........)).)))...)).))..))))))((((....)))))))))))))).)))).....	((((((((((((((((((......)))).........((.((((..((((..(((.((........)).)))...)).))..))))))((((....)))))))))))))).)))).....	0.5
367	486	37	-35	-1.79	0.04	15.65	UCUUGCUGCCAUGUUGAGAAUAAUCAAUGCUAGGAAAGAGAGGAAGAGACGUGGCGCAGACACCAGCAUCGGAAUCAUUGGCCUCCUGCUGACUACAGCCAUGGCAGCAGAGAUCACUAG	(((((((((((((((((......)))).........((.((((..((((..(((.((........)).)))...)).))..))))))((((....)))))))))))))).))).......	((.((((((((((((((......)))).........((.((((..((((..(((.((........)).)))...)).))..))))))((((....))))))))))))))..)).......	0.50833
368	487	37	-34.4	-1.51	0.06	14.43	CUUGCUGCCAUGUUGAGAAUAAUCAAUGCUAGGAAAGAGAGGAAGAGACGUGGCGCAGACACCAGCAUCGGAAUCAUUGGCCUCCUGCUGACUACAGCCAUGGCAGCAGAGAUCACUAGA	.(((((((((((((((......)))).........((.((((..((((..(((.((........)).)))...)).))..))))))((((....)))))))))))))))...........	.(((((((((((((((......)))).........((.((((..((((..(((.((........)).)))...)).))..))))))((((....)))))))))))))))...........	0.50833
369	488	37	-34.2	-1.25	0.11	13.44	UUGCUGCCAUGUUGAGAAUAAUCAAUGCUAGGAAAGAGAGGAAGAGACGUGGCGCAGACACCAGCAUCGGAAUCAUUGGCCUCCUGCUGACUACAGCCAUGGCAGCAGAGAUCACUAGAC	(((((((((((((((......)))).........((.((((..((((..(((.((........)).)))...)).))..))))))((((....)))))))))))))))............	(((((((((((((((......)))).........((.((((..((((..(((.((........)).)))...)).))..))))))((((....)))))))))))))))............	0.50833
370	489	37	-33.6	-1.36	0.09	13.37	UGCUGCCAUGUUGAGAAUAAUCAAUGCUAGGAAAGAGAGGAAGAGACGUGGCGCAGACACCAGCAUCGGAAUCAUUGGCCUCCUGCUGACUACAGCCAUGGCAGCAGAGAUCACUAGACG	((((((((((((((......)))).........((.((((..((((..(((.((........)).)))...)).))..))))))((((....))))))))))))))..............	((((((((((((((......)))).........((.((((..((((..(((.((........)).)))...)).))..))))))((((....))))))))))))))..............	0.51667
371	490	37	-32.9	-1.12	0.12	13.21	GCUGCCAUGUUGAGAAUAAUCAAUGCUAGGAAAGAGAGGAAGAGACGUGGCGCAGACACCAGCAUCGGAAUCAUUGGCCUCCUGCUGACUACAGCCAUGGCAGCAGAGAUCACUAGACGC	(((((((((((((......)))).........((.((((..((((..(((.((........)).)))...)).))..))))))((((....)))))))))))))................	(((((((((((((......)))).........((.((((..((((..(((.((........)).)))...)).))..))))))((((....)))))))))))))................	0.525
372	491	37	-28.2	0.19	0.54	24.55	CUGCCAUGUUGAGAAUAAUCAAUGCUAGGAAAGAGAGGAAGAGACGUGGCGCAGACACCAGCAUCGGAAUCAUUGGCCUCCUGCUGACUACAGCCAUGGCAGCAGAGAUCACUAGACGCG	((((((((((((......)))).........((.((((..((((..(((.((........)).)))...)).))..))))))((((....))))))))))))..................	((((((((((((......)))).........((.((((..((((..(((.((........)).)))...)).))..))))))((((....))))))))))))..................	0.525
373	492	37	-26.4	0.64	0.73	35.48	UGCCAUGUUGAGAAUAAUCAAUGCUAGGAAAGAGAGGAAGAGACGUGGCGCAGACACCAGCAUCGGAAUCAUUGGCCUCCUGCUGACUACAGCCAUGGCAGCAGAGAUCACUAGACGCGG	.((((((((........((............))........)))))))).......((.((.(((..(((.((((((....((((....))))...)))..))).)))..)..)).))))	.((((((((................................))))))))...............................(((((.(((......)))))))).................	0.525
374	493	37	-27.7	0.39	0.64	29.53	GCCAUGUUGAGAAUAAUCAAUGCUAGGAAAGAGAGGAAGAGACGUGGCGCAGACACCAGCAUCGGAAUCAUUGGCCUCCUGCUGACUACAGCCAUGGCAGCAGAGAUCACUAGACGCGGG	((((((((........((............))........)))))))).......((.((.(((..(((.((((((....((((....))))...)))..))).)))..)..)).)))).	((((((((........((............))........))))))))..........((.((................(((((.((........)))))))..........)).))...	0.53333
375	494	37	-25.9	0.74	0.76	26.52	CCAUGUUGAGAAUAAUCAAUGCUAGGAAAGAGAGGAAGAGACGUGGCGCAGACACCAGCAUCGGAAUCAUUGGCCUCCUGCUGACUACAGCCAUGGCAGCAGAGAUCACUAGACGCGGGA	....(((((......))))).((((((....((((..((((..(((.((........)).)))...)).))..))))((((((.(((......)))))))))...)).))))........	....(((((......))))).((((......((((..((((..(((.((........)).)))...)).))..))))((((((.(((......)))))))))......))))........	0.525
376	495	37	-25.9	0.68	0.72	11.21	CAUGUUGAGAAUAAUCAAUGCUAGGAAAGAGAGGAAGAGACGUGGCGCAGACACCAGCAUCGGAAUCAUUGGCCUCCUGCUGACUACAGCCAUGGCAGCAGAGAUCACUAGACGCGGGAG	...(((((......))))).((((((....((((..((((..(((.((........)).)))...)).))..))))((((((.(((......)))))))))...)).)))).........	...(((((......))))).((((((....((((..((((..(((.((........)).)))...)).))..))))((((((.(((......)))))))))...)).)))).........	0.525
377	496	37	-25.9	0.46	0.68	11.71	AUGUUGAGAAUAAUCAAUGCUAGGAAAGAGAGGAAGAGACGUGGCGCAGACACCAGCAUCGGAAUCAUUGGCCUCCUGCUGACUACAGCCAUGGCAGCAGAGAUCACUAGACGCGGGAGU	..(((((......))))).((((((....((((..((((..(((.((........)).)))...)).))..))))((((((.(((......)))))))))...)).))))..........	..(((((......))))).((((((....((((..((((..(((.((........)).)))...)).))..))))((((((.(((......)))))))))...)).))))..........	0.51667
378	497	37	-27	0.52	0.69	11.47	UGUUGAGAAUAAUCAAUGCUAGGAAAGAGAGGAAGAGACGUGGCGCAGACACCAGCAUCGGAAUCAUUGGCCUCCUGCUGACUACAGCCAUGGCAGCAGAGAUCACUAGACGCGGGAGUG	.(((((......))))).((((((....((((..((((..(((.((........)).)))...)).))..))))((((((.(((......)))))))))...)).)))).(((....)))	.(((((......))))).((((((....((((..((((..(((.((........)).)))...)).))..))))((((((.(((......)))))))))...)).)))).(((....)))	0.525
379	498	37	-27.5	0.49	0.65	16.1	GUUGAGAAUAAUCAAUGCUAGGAAAGAGAGGAAGAGACGUGGCGCAGACACCAGCAUCGGAAUCAUUGGCCUCCUGCUGACUACAGCCAUGGCAGCAGAGAUCACUAGACGCGGGAGUGC	(((((......))))).((((((....((((..((((..(((.((........)).)))...)).))..))))((((((.(((......)))))))))...)).)))).(((....))).	(((((......))))).((((((....((((..((((..(((.((........)).)))...)).))..))))((((((.(((......)))))))))...)).)))).(((....))).	0.53333
380	499	37	-26.1	0.75	0.77	22.98	UUGAGAAUAAUCAAUGCUAGGAAAGAGAGGAAGAGACGUGGCGCAGACACCAGCAUCGGAAUCAUUGGCCUCCUGCUGACUACAGCCAUGGCAGCAGAGAUCACUAGACGCGGGAGUGCA	((((......))))..((((((....((((..((((..(((.((........)).)))...)).))..))))((((((.(((......)))))))))...)).))))..(((....))).	((((......))))..((((((....((((..((((..(((.((........)).)))...)).))..))))((((((.(((......)))))))))...)).))))..((......)).	0.525
381	500	37	-25.4	0.84	0.8	23.69	UGAGAAUAAUCAAUGCUAGGAAAGAGAGGAAGAGACGUGGCGCAGACACCAGCAUCGGAAUCAUUGGCCUCCUGCUGACUACAGCCAUGGCAGCAGAGAUCACUAGACGCGGGAGUGCAU	(((......)))...((((((....((((..((((..(((.((........)).)))...)).))..))))((((((.(((......)))))))))...)).))))..(((....)))..	(((......)))...(((((.....((((..((((..(((.((........)).)))...)).))..))))((((((.(((......)))))))))....).))))..((......))..	0.525
382	501	37	-24.8	0.75	0.74	24.08	GAGAAUAAUCAAUGCUAGGAAAGAGAGGAAGAGACGUGGCGCAGACACCAGCAUCGGAAUCAUUGGCCUCCUGCUGACUACAGCCAUGGCAGCAGAGAUCACUAGACGCGGGAGUGCAUA	..............((((((....((((..((((..(((.((........)).)))...)).))..))))((((((.(((......)))))))))...)).))))..(((....)))...	..............(((((.....((((..((((..(((.((........)).)))...)).))..))))((((((.(((......)))))))))....).))))...............	0.525
383	502	37	-24.8	0.75	0.77	23.55	AGAAUAAUCAAUGCUAGGAAAGAGAGGAAGAGACGUGGCGCAGACACCAGCAUCGGAAUCAUUGGCCUCCUGCUGACUACAGCCAUGGCAGCAGAGAUCACUAGACGCGGGAGUGCAUAC	.............((((((....((((..((((..(((.((........)).)))...)).))..))))((((((.(((......)))))))))...)).))))..(((....)))....	.............(((((.....((((..((((..(((.((........)).)))...)).))..))))((((((.(((......)))))))))....).))))................	0.525
384	503	37	-24.8	0.88	0.8	24.05	GAAUAAUCAAUGCUAGGAAAGAGAGGAAGAGACGUGGCGCAGACACCAGCAUCGGAAUCAUUGGCCUCCUGCUGACUACAGCCAUGGCAGCAGAGAUCACUAGACGCGGGAGUGCAUACU	............((((((....((((..((((..(((.((........)).)))...)).))..))))((((((.(((......)))))))))...)).))))..(((....))).....	............(((((.....((((..(((...(((.((........)).)))....).))..))))((((((.(((......)))))))))....).)))).................	0.525
385	504	37	-24.8	0.73	0.78	23.71	AAUAAUCAAUGCUAGGAAAGAGAGGAAGAGACGUGGCGCAGACACCAGCAUCGGAAUCAUUGGCCUCCUGCUGACUACAGCCAUGGCAGCAGAGAUCACUAGACGCGGGAGUGCAUACUA	...........((((((....((((..((((..(((.((........)).)))...)).))..))))((((((.(((......)))))))))...)).))))..(((....)))......	...........(((((.....((((..(((...(((.((........)).)))....).))..))))((((((.(((......)))))))))....).))))..................	0.51667
386	505	37	-24.8	1.07	0.89	24.33	AUAAUCAAUGCUAGGAAAGAGAGGAAGAGACGUGGCGCAGACACCAGCAUCGGAAUCAUUGGCCUCCUGCUGACUACAGCCAUGGCAGCAGAGAUCACUAGACGCGGGAGUGCAUACUAC	..........((((((....((((..((((..(((.((........)).)))...)).))..))))((((((.(((......)))))))))...)).))))..(((....))).......	..........(((((.....((((..(((...(((.((........)).)))....).))..))))((((((.(((......)))))))))....).))))...................	0.525
387	506	37	-24.8	1	0.84	26.79	UAAUCAAUGCUAGGAAAGAGAGGAAGAGACGUGGCGCAGACACCAGCAUCGGAAUCAUUGGCCUCCUGCUGACUACAGCCAUGGCAGCAGAGAUCACUAGACGCGGGAGUGCAUACUACA	.........((((((....((((..((((..(((.((........)).)))...)).))..))))((((((.(((......)))))))))...)).))))..(((....)))........	.........((((......((((..(((...(((.((........)).)))....).))..))))((((((.(((......)))))))))......))))....................	0.525
388	507	37	-24.8	0.96	0.82	26.9	AAUCAAUGCUAGGAAAGAGAGGAAGAGACGUGGCGCAGACACCAGCAUCGGAAUCAUUGGCCUCCUGCUGACUACAGCCAUGGCAGCAGAGAUCACUAGACGCGGGAGUGCAUACUACAU	........((((((....((((..((((..(((.((........)).)))...)).))..))))((((((.(((......)))))))))...)).))))..(((....))).........	........((((......((((..(((...(((.((........)).)))....).))..))))((((((.(((......)))))))))......)))).....................	0.525
389	508	37	-24.8	1.33	0.87	26.93	AUCAAUGCUAGGAAAGAGAGGAAGAGACGUGGCGCAGACACCAGCAUCGGAAUCAUUGGCCUCCUGCUGACUACAGCCAUGGCAGCAGAGAUCACUAGACGCGGGAGUGCAUACUACAUG	.......((((((....((((..((((..(((.((........)).)))...)).))..))))((((((.(((......)))))))))...)).))))..(((....)))..........	.......((((......((((..(((...(((.((........)).)))....).))..))))((((((.(((......)))))))))......))))......................	0.53333
390	509	37	-24.8	1.54	0.96	26.99	UCAAUGCUAGGAAAGAGAGGAAGAGACGUGGCGCAGACACCAGCAUCGGAAUCAUUGGCCUCCUGCUGACUACAGCCAUGGCAGCAGAGAUCACUAGACGCGGGAGUGCAUACUACAUGU	......((((((....((((..((((..(((.((........)).)))...)).))..))))((((((.(((......)))))))))...)).))))..(((....)))...........	......((((......((((..((((..(((.((........)).)))...)).))..))))((((((.(((......)))))))))......)))).......................	0.53333
391	510	37	-24.8	1.37	0.89	26.28	CAAUGCUAGGAAAGAGAGGAAGAGACGUGGCGCAGACACCAGCAUCGGAAUCAUUGGCCUCCUGCUGACUACAGCCAUGGCAGCAGAGAUCACUAGACGCGGGAGUGCAUACUACAUGUA	.....((((((....((((..((((..(((.((........)).)))...)).))..))))((((((.(((......)))))))))...)).))))..(((....)))............	.....(((((.....((((..((((..(((.((........)).)))...)).))..))))((((((.(((......)))))))))....).))))........................	0.53333
392	511	37	-26.7	0.8	0.7	15.72	AAUGCUAGGAAAGAGAGGAAGAGACGUGGCGCAGACACCAGCAUCGGAAUCAUUGGCCUCCUGCUGACUACAGCCAUGGCAGCAGAGAUCACUAGACGCGGGAGUGCAUACUACAUGUAC	....((((((....((((..((((..(((.((........)).)))...)).))..))))((((((.(((......)))))))))...)).))))........((((((.....))))))	....((((((....((((..((((..(((.((........)).)))...)).))..))))((((((.(((......)))))))))...)).))))........((((((.....))))))	0.53333
393	512	37	-28.5	0.53	0.69	11.04	AUGCUAGGAAAGAGAGGAAGAGACGUGGCGCAGACACCAGCAUCGGAAUCAUUGGCCUCCUGCUGACUACAGCCAUGGCAGCAGAGAUCACUAGACGCGGGAGUGCAUACUACAUGUACU	...((((((....((((..((((..(((.((........)).)))...)).))..))))((((((.(((......)))))))))...)).)))).......(((((((.....)))))))	..(((((((....((((..((((..(((.((........)).)))...)).))..))))((((((.(((......)))))))))...)).)))).).....(((((((.....)))))))	0.53333
394	513	37	-29.8	0.38	0.64	10.45	UGCUAGGAAAGAGAGGAAGAGACGUGGCGCAGACACCAGCAUCGGAAUCAUUGGCCUCCUGCUGACUACAGCCAUGGCAGCAGAGAUCACUAGACGCGGGAGUGCAUACUACAUGUACUU	..((((((....((((..((((..(((.((........)).)))...)).))..))))((((((.(((......)))))))))...)).))))......((((((((.....))))))))	.(((((((....((((..((((..(((.((........)).)))...)).))..))))((((((.(((......)))))))))...)).)))).)....((((((((.....))))))))	0.53333
395	514	37	-30.2	0.19	0.54	9.67	GCUAGGAAAGAGAGGAAGAGACGUGGCGCAGACACCAGCAUCGGAAUCAUUGGCCUCCUGCUGACUACAGCCAUGGCAGCAGAGAUCACUAGACGCGGGAGUGCAUACUACAUGUACUUG	.((((((....((((..((((..(((.((........)).)))...)).))..))))((((((.(((......)))))))))...)).))))......((((((((.....)))))))).	.((((((....((((..((((..(((.((........)).)))...)).))..))))((((((.(((......)))))))))...)).))))......((((((((.....)))))))).	0.54167
396	515	37	-30	0.26	0.57	9.35	CUAGGAAAGAGAGGAAGAGACGUGGCGCAGACACCAGCAUCGGAAUCAUUGGCCUCCUGCUGACUACAGCCAUGGCAGCAGAGAUCACUAGACGCGGGAGUGCAUACUACAUGUACUUGG	((((((....((((..((((..(((.((........)).)))...)).))..))))((((((.(((......)))))))))...)).))))......((((((((.....))))))))..	((((((....((((..((((..(((.((........)).)))...)).))..))))((((((.(((......)))))))))...)).))))......((((((((.....))))))))..	0.54167
397	516	37	-27.8	0.73	0.76	18.64	UAGGAAAGAGAGGAAGAGACGUGGCGCAGACACCAGCAUCGGAAUCAUUGGCCUCCUGCUGACUACAGCCAUGGCAGCAGAGAUCACUAGACGCGGGAGUGCAUACUACAUGUACUUGGA	.........((((..((((..(((.((........)).)))...)).))..))))((((((.(((......)))))))))................((((((((.....))))))))...	.........((((..((....(((.((........)).)))......))..))))((((((.(((......)))))))))................((((((((.....))))))))...	0.53333
398	517	37	-27.8	0.55	0.63	18.15	AGGAAAGAGAGGAAGAGACGUGGCGCAGACACCAGCAUCGGAAUCAUUGGCCUCCUGCUGACUACAGCCAUGGCAGCAGAGAUCACUAGACGCGGGAGUGCAUACUACAUGUACUUGGAU	........((((..((((..(((.((........)).)))...)).))..))))((((((.(((......)))))))))................((((((((.....))))))))....	........((((..((....(((.((........)).)))......))..))))((((((.(((......)))))))))................((((((((.....))))))))....	0.53333
399	518	37	-27.8	0.81	0.75	17.49	GGAAAGAGAGGAAGAGACGUGGCGCAGACACCAGCAUCGGAAUCAUUGGCCUCCUGCUGACUACAGCCAUGGCAGCAGAGAUCACUAGACGCGGGAGUGCAUACUACAUGUACUUGGAUA	.......((((..((((..(((.((........)).)))...)).))..))))((((((.(((......)))))))))................((((((((.....)))))))).....	.......((((..(((...(((.((........)).)))....).))..))))((((((.(((......)))))))))................((((((((.....)))))))).....	0.53333
400	519	37	-28.4	0.7	0.77	12.48	GAAAGAGAGGAAGAGACGUGGCGCAGACACCAGCAUCGGAAUCAUUGGCCUCCUGCUGACUACAGCCAUGGCAGCAGAGAUCACUAGACGCGGGAGUGCAUACUACAUGUACUUGGAUAG	......((((..((((..(((.((........)).)))...)).))..))))((((((.(((......)))))))))......(((..(....((((((((.....)))))))))..)))	......((((..((((..(((.((........)).)))...)).))..))))((((((.(((......)))))))))......(((..(....((((((((.....)))))))))..)))	0.53333
401	520	37	-29.5	0.11	0.51	9.95	AAAGAGAGGAAGAGACGUGGCGCAGACACCAGCAUCGGAAUCAUUGGCCUCCUGCUGACUACAGCCAUGGCAGCAGAGAUCACUAGACGCGGGAGUGCAUACUACAUGUACUUGGAUAGG	.....((((..((((..(((.((........)).)))...)).))..))))((((((.(((......)))))))))......(((..(....((((((((.....)))))))))..))).	.....((((..((((..(((.((........)).)))...)).))..))))((((((.(((......)))))))))......(((..(....((((((((.....)))))))))..))).	0.53333
402	521	37	-29.6	0.31	0.61	9.72	AAGAGAGGAAGAGACGUGGCGCAGACACCAGCAUCGGAAUCAUUGGCCUCCUGCUGACUACAGCCAUGGCAGCAGAGAUCACUAGACGCGGGAGUGCAUACUACAUGUACUUGGAUAGGA	....((((..((((..(((.((........)).)))...)).))..))))((((((.(((......)))))))))...((.(((..(....((((((((.....)))))))))..)))))	....((((..((((..(((.((........)).)))...)).))..))))((((((.(((......)))))))))....(.(((..(....((((((((.....)))))))))..)))).	0.53333
403	522	37	-30.1	0.22	0.55	9.33	AGAGAGGAAGAGACGUGGCGCAGACACCAGCAUCGGAAUCAUUGGCCUCCUGCUGACUACAGCCAUGGCAGCAGAGAUCACUAGACGCGGGAGUGCAUACUACAUGUACUUGGAUAGGAG	...((((..((((..(((.((........)).)))...)).))..))))((((((.(((......)))))))))...((.(((..(....((((((((.....)))))))))..))))).	...((((..((((..(((.((........)).)))...)).))..))))((((((.(((......)))))))))...((.(((..(....((((((((.....)))))))))..))))).	0.54167
404	523	37	-30.1	0.6	0.72	9.52	GAGAGGAAGAGACGUGGCGCAGACACCAGCAUCGGAAUCAUUGGCCUCCUGCUGACUACAGCCAUGGCAGCAGAGAUCACUAGACGCGGGAGUGCAUACUACAUGUACUUGGAUAGGAGC	..((((..((((..(((.((........)).)))...)).))..))))((((((.(((......)))))))))...((.(((..(....((((((((.....)))))))))..)))))..	..((((..((((..(((.((........)).)))...)).))..))))((((((.(((......)))))))))...((.(((..(....((((((((.....)))))))))..)))))..	0.55
405	524	37	-30.1	0.54	0.62	10.8	AGAGGAAGAGACGUGGCGCAGACACCAGCAUCGGAAUCAUUGGCCUCCUGCUGACUACAGCCAUGGCAGCAGAGAUCACUAGACGCGGGAGUGCAUACUACAUGUACUUGGAUAGGAGCG	.((((..((((..(((.((........)).)))...)).))..))))((((((.(((......)))))))))...((.(((..(....((((((((.....)))))))))..)))))...	.((((..((((..(((.((........)).)))...)).))..))))((((((.(((......)))))))))...((.(((..(....((((((((.....)))))))))..)))))...	0.55
406	525	37	-30	0.48	0.61	13.34	GAGGAAGAGACGUGGCGCAGACACCAGCAUCGGAAUCAUUGGCCUCCUGCUGACUACAGCCAUGGCAGCAGAGAUCACUAGACGCGGGAGUGCAUACUACAUGUACUUGGAUAGGAGCGA	((((..((((..(((.((........)).)))...)).))..))))((((((.(((......)))))))))...........(((..((((((((.....))))))))........))).	((((..((((..(((.((........)).)))...)).))..))))((((((.(((......)))))))))....(.(((..(....((((((((.....)))))))))..)))).....	0.55
407	526	37	-27.3	1.24	0.88	24.72	AGGAAGAGACGUGGCGCAGACACCAGCAUCGGAAUCAUUGGCCUCCUGCUGACUACAGCCAUGGCAGCAGAGAUCACUAGACGCGGGAGUGCAUACUACAUGUACUUGGAUAGGAGCGAU	.........((((((.((((..((......))..))..)))))((((((((.(((......))))))))).))((.(((..(....((((((((.....)))))))))..))))))))..	............(((...((..((......))..))....)))..((((((.(((......)))))))))......(((..(....((((((((.....)))))))))..))).......	0.54167
408	527	37	-27.3	1.76	0.96	28.7	GGAAGAGACGUGGCGCAGACACCAGCAUCGGAAUCAUUGGCCUCCUGCUGACUACAGCCAUGGCAGCAGAGAUCACUAGACGCGGGAGUGCAUACUACAUGUACUUGGAUAGGAGCGAUG	........((((((.((((..((......))..))..)))))((((((((.(((......))))))))).))((.(((..(....((((((((.....)))))))))..))))))))...	.....................((......)).............((((((.(((......)))))))))......(((.......((((((((.....))))))))...)))........	0.55
409	528	37	-30.1	0.82	0.73	28.9	GAAGAGACGUGGCGCAGACACCAGCAUCGGAAUCAUUGGCCUCCUGCUGACUACAGCCAUGGCAGCAGAGAUCACUAGACGCGGGAGUGCAUACUACAUGUACUUGGAUAGGAGCGAUGC	.......((((((........(((((..(((..........))))))))......))))))...(((..(.((.(((..(....((((((((.....)))))))))..))))).)..)))	.......................((((((...............(((((.((........))))))).......(((..(....((((((((.....)))))))))..)))...))))))	0.55
410	529	37	-30.9	0.48	0.65	28.56	AAGAGACGUGGCGCAGACACCAGCAUCGGAAUCAUUGGCCUCCUGCUGACUACAGCCAUGGCAGCAGAGAUCACUAGACGCGGGAGUGCAUACUACAUGUACUUGGAUAGGAGCGAUGCC	......((((((........(((((..(((..........))))))))......))))))...(((..(.((.(((..(....((((((((.....)))))))))..))))).)..))).	......................((((((...............(((((.((........))))))).......(((..(....((((((((.....)))))))))..)))...)))))).	0.55
411	530	37	-30.9	0.52	0.7	29.77	AGAGACGUGGCGCAGACACCAGCAUCGGAAUCAUUGGCCUCCUGCUGACUACAGCCAUGGCAGCAGAGAUCACUAGACGCGGGAGUGCAUACUACAUGUACUUGGAUAGGAGCGAUGCCG	.....((((((........(((((..(((..........))))))))......))))))...(((..(.((.(((..(....((((((((.....)))))))))..))))).)..)))..	.....................((((((...............(((((.((........))))))).......(((..(....((((((((.....)))))))))..)))...))))))..	0.55833
412	531	37	-30.9	1.05	0.89	28.53	GAGACGUGGCGCAGACACCAGCAUCGGAAUCAUUGGCCUCCUGCUGACUACAGCCAUGGCAGCAGAGAUCACUAGACGCGGGAGUGCAUACUACAUGUACUUGGAUAGGAGCGAUGCCGG	....((((((........(((((..(((..........))))))))......))))))...(((..(.((.(((..(....((((((((.....)))))))))..))))).)..)))...	....................((((((...........((..(((((.(((......)))))))).))....(((..(....((((((((.....)))))))))..)))...))))))...	0.56667
413	532	37	-32	0.8	0.77	21.4	AGACGUGGCGCAGACACCAGCAUCGGAAUCAUUGGCCUCCUGCUGACUACAGCCAUGGCAGCAGAGAUCACUAGACGCGGGAGUGCAUACUACAUGUACUUGGAUAGGAGCGAUGCCGGG	................((.((((((.......(((.(((.(((((.(((......))))))))))).)))(((..(....((((((((.....)))))))))..)))...)))))).)).	................((.((((((...........((.((((((.(((......)))))))))))....(((..(....((((((((.....)))))))))..)))...)))))).)).	0.56667
414	533	37	-32	0.73	0.79	22.26	GACGUGGCGCAGACACCAGCAUCGGAAUCAUUGGCCUCCUGCUGACUACAGCCAUGGCAGCAGAGAUCACUAGACGCGGGAGUGCAUACUACAUGUACUUGGAUAGGAGCGAUGCCGGGA	...............((.((((((.......(((.(((.(((((.(((......))))))))))).)))(((..(....((((((((.....)))))))))..)))...)))))).))..	...............((.((((((...........((.((((((.(((......)))))))))))....(((..(....((((((((.....)))))))))..)))...)))))).))..	0.56667
415	534	37	-32	0.41	0.56	21.69	ACGUGGCGCAGACACCAGCAUCGGAAUCAUUGGCCUCCUGCUGACUACAGCCAUGGCAGCAGAGAUCACUAGACGCGGGAGUGCAUACUACAUGUACUUGGAUAGGAGCGAUGCCGGGAA	..............((.((((((.......(((.(((.(((((.(((......))))))))))).)))(((..(....((((((((.....)))))))))..)))...)))))).))...	..............((.((((((........(..((.((((((.(((......)))))))))))..).(((..(....((((((((.....)))))))))..)))...)))))).))...	0.55833
416	535	37	-32	0.82	0.75	20.44	CGUGGCGCAGACACCAGCAUCGGAAUCAUUGGCCUCCUGCUGACUACAGCCAUGGCAGCAGAGAUCACUAGACGCGGGAGUGCAUACUACAUGUACUUGGAUAGGAGCGAUGCCGGGAAG	.............((.((((((.......(((.(((.(((((.(((......))))))))))).)))(((..(....((((((((.....)))))))))..)))...)))))).))....	.............((.((((((........(..((.((((((.(((......)))))))))))..).(((..(....((((((((.....)))))))))..)))...)))))).))....	0.56667
417	536	37	-32	0.96	0.84	15.67	GUGGCGCAGACACCAGCAUCGGAAUCAUUGGCCUCCUGCUGACUACAGCCAUGGCAGCAGAGAUCACUAGACGCGGGAGUGCAUACUACAUGUACUUGGAUAGGAGCGAUGCCGGGAAGG	............((.((((((.......(((.(((.(((((.(((......))))))))))).)))(((..(....((((((((.....)))))))))..)))...)))))).)).....	............((.((((((........(..((.((((((.(((......)))))))))))..).(((..(....((((((((.....)))))))))..)))...)))))).)).....	0.56667
418	537	37	-32.9	0.46	0.68	14.56	UGGCGCAGACACCAGCAUCGGAAUCAUUGGCCUCCUGCUGACUACAGCCAUGGCAGCAGAGAUCACUAGACGCGGGAGUGCAUACUACAUGUACUUGGAUAGGAGCGAUGCCGGGAAGGC	....((.....((.((((((.......(((.(((.(((((.(((......))))))))))).)))(((..(....((((((((.....)))))))))..)))...)))))).))....))	....((.....((.((((((........(..((.((((((.(((......)))))))))))..).(((..(....((((((((.....)))))))))..)))...)))))).))....))	0.56667
419	538	37	-34.7	0.13	0.5	14.08	GGCGCAGACACCAGCAUCGGAAUCAUUGGCCUCCUGCUGACUACAGCCAUGGCAGCAGAGAUCACUAGACGCGGGAGUGCAUACUACAUGUACUUGGAUAGGAGCGAUGCCGGGAAGGCC	(((.......((.((((((.......(((.(((.(((((.(((......))))))))))).)))(((..(....((((((((.....)))))))))..)))...)))))).))....)))	(((.......((.((((((........(..((.((((((.(((......)))))))))))..).(((..(....((((((((.....)))))))))..)))...)))))).))....)))	0.575
420	539	37	-33.8	0.16	0.51	21.63	GCGCAGACACCAGCAUCGGAAUCAUUGGCCUCCUGCUGACUACAGCCAUGGCAGCAGAGAUCACUAGACGCGGGAGUGCAUACUACAUGUACUUGGAUAGGAGCGAUGCCGGGAAGGCCA	(.((.....((.((((((.......(((.(((.(((((.(((......))))))))))).)))(((..(....((((((((.....)))))))))..)))...)))))).))....))).	..((.....((.((((((...........((.((((((.(((......)))))))))))....(((..(....((((((((.....)))))))))..)))...)))))).))....))..	0.56667
421	540	37	-33.7	-0.08	0.46	28.77	CGCAGACACCAGCAUCGGAAUCAUUGGCCUCCUGCUGACUACAGCCAUGGCAGCAGAGAUCACUAGACGCGGGAGUGCAUACUACAUGUACUUGGAUAGGAGCGAUGCCGGGAAGGCCAU	.((.....((.((((((.......(((.(((.(((((.(((......))))))))))).)))(((..(....((((((((.....)))))))))..)))...)))))).))....))...	.((.....((.((((((...............(((((.((........))))))).......(((..(....((((((((.....)))))))))..)))...)))))).))....))...	0.55833
422	541	37	-33.4	-0.02	0.5	29.9	GCAGACACCAGCAUCGGAAUCAUUGGCCUCCUGCUGACUACAGCCAUGGCAGCAGAGAUCACUAGACGCGGGAGUGCAUACUACAUGUACUUGGAUAGGAGCGAUGCCGGGAAGGCCAUU	((.....((.((((((.......(((.(((.(((((.(((......))))))))))).)))(((..(....((((((((.....)))))))))..)))...)))))).))....))....	........................((((.(............................((.(((..(....((((((((.....)))))))))..)))))..........)..))))...	0.55
423	542	37	-33.2	-0.17	0.36	18.77	CAGACACCAGCAUCGGAAUCAUUGGCCUCCUGCUGACUACAGCCAUGGCAGCAGAGAUCACUAGACGCGGGAGUGCAUACUACAUGUACUUGGAUAGGAGCGAUGCCGGGAAGGCCAUUU	..((..((......))..))..(((((((((((((....))))...((((.....(.((.(((..(....((((((((.....)))))))))..))))).)..))))))).))))))...	..((..((......))..))..(((((.(((((((....))))...((((.......((.(((..(....((((((((.....)))))))))..)))))....)))))))..)))))...	0.54167
424	543	37	-33.2	-0.1	0.42	20.35	AGACACCAGCAUCGGAAUCAUUGGCCUCCUGCUGACUACAGCCAUGGCAGCAGAGAUCACUAGACGCGGGAGUGCAUACUACAUGUACUUGGAUAGGAGCGAUGCCGGGAAGGCCAUUUC	.((..((......))..))..(((((((((((((....))))...((((.....(.((.(((..(....((((((((.....)))))))))..))))).)..))))))).))))))....	.((..((......))..))..(((((.(((((((....))))...((((.......((.(((..(....((((((((.....)))))))))..)))))....)))))))..)))))....	0.54167
425	544	37	-33.4	0.04	0.5	26.5	GACACCAGCAUCGGAAUCAUUGGCCUCCUGCUGACUACAGCCAUGGCAGCAGAGAUCACUAGACGCGGGAGUGCAUACUACAUGUACUUGGAUAGGAGCGAUGCCGGGAAGGCCAUUUCG	((..((......))..))..(((((((((((((....))))...((((.....(.((.(((..(....((((((((.....)))))))))..))))).)..))))))).)))))).....	....................(((((.(((((((....))))...((((.......((.(((..(....((((((((.....)))))))))..)))))....)))))))..))))).....	0.55
426	545	37	-33.7	-0.15	0.4	24.91	ACACCAGCAUCGGAAUCAUUGGCCUCCUGCUGACUACAGCCAUGGCAGCAGAGAUCACUAGACGCGGGAGUGCAUACUACAUGUACUUGGAUAGGAGCGAUGCCGGGAAGGCCAUUUCGU	..........(((((....(((((((((((((....))))...((((.....(.((.(((..(....((((((((.....)))))))))..))))).)..))))))).))))))))))).	..........(((((....(((((.(((((((....))))...((((.......((.(((..(....((((((((.....)))))))))..)))))....)))))))..)))))))))).	0.54167
427	546	37	-33.7	0	0.5	24.75	CACCAGCAUCGGAAUCAUUGGCCUCCUGCUGACUACAGCCAUGGCAGCAGAGAUCACUAGACGCGGGAGUGCAUACUACAUGUACUUGGAUAGGAGCGAUGCCGGGAAGGCCAUUUCGUU	.........(((((....(((((((((((((....))))...((((.....(.((.(((..(....((((((((.....)))))))))..))))).)..))))))).)))))))))))..	.........(((((....(((((.(((((((....))))...((((.......((.(((..(....((((((((.....)))))))))..)))))....)))))))..))))))))))..	0.54167
428	547	37	-33.7	-0.07	0.43	25.04	ACCAGCAUCGGAAUCAUUGGCCUCCUGCUGACUACAGCCAUGGCAGCAGAGAUCACUAGACGCGGGAGUGCAUACUACAUGUACUUGGAUAGGAGCGAUGCCGGGAAGGCCAUUUCGUUU	........(((((....(((((((((((((....))))...((((.....(.((.(((..(....((((((((.....)))))))))..))))).)..))))))).)))))))))))...	........(((((....(((((.(((((((....))))...((((.......((.(((..(....((((((((.....)))))))))..)))))....)))))))..))))))))))...	0.53333
429	548	37	-33.7	0.14	0.51	21	CCAGCAUCGGAAUCAUUGGCCUCCUGCUGACUACAGCCAUGGCAGCAGAGAUCACUAGACGCGGGAGUGCAUACUACAUGUACUUGGAUAGGAGCGAUGCCGGGAAGGCCAUUUCGUUUG	.......(((((....(((((((((((((....))))...((((.....(.((.(((..(....((((((((.....)))))))))..))))).)..))))))).)))))))))))....	.......(((((....(((((.(((((((....))))...((((.......((.(((..(....((((((((.....)))))))))..)))))....)))))))..))))))))))....	0.54167
430	549	37	-36.5	-0.51	0.3	11.69	CAGCAUCGGAAUCAUUGGCCUCCUGCUGACUACAGCCAUGGCAGCAGAGAUCACUAGACGCGGGAGUGCAUACUACAUGUACUUGGAUAGGAGCGAUGCCGGGAAGGCCAUUUCGUUUGC	..(((.(((((....(((((((((((((....))))...((((.....(.((.(((..(....((((((((.....)))))))))..))))).)..))))))).)))))))))))..)))	..(((.(((((....(((((((((((((....))))...((((.......((.(((..(....((((((((.....)))))))))..)))))....))))))).)))))))))))..)))	0.54167
431	550	37	-37.9	-1.1	0.14	11.87	AGCAUCGGAAUCAUUGGCCUCCUGCUGACUACAGCCAUGGCAGCAGAGAUCACUAGACGCGGGAGUGCAUACUACAUGUACUUGGAUAGGAGCGAUGCCGGGAAGGCCAUUUCGUUUGCU	((((.(((((....(((((((((((((....))))...((((.....(.((.(((..(....((((((((.....)))))))))..))))).)..))))))).)))))))))))..))))	((((.(((((....(((((((((((((....))))...((((.......((.(((..(....((((((((.....)))))))))..)))))....))))))).)))))))))))..))))	0.53333
432	551	37	-37.5	-1.01	0.11	11.5	GCAUCGGAAUCAUUGGCCUCCUGCUGACUACAGCCAUGGCAGCAGAGAUCACUAGACGCGGGAGUGCAUACUACAUGUACUUGGAUAGGAGCGAUGCCGGGAAGGCCAUUUCGUUUGCUA	(((.(((((....(((((((((((((....))))...((((.....(.((.(((..(....((((((((.....)))))))))..))))).)..))))))).)))))))))))..)))..	(((.(((((....(((((((((((((....))))...((((.......((.(((..(....((((((((.....)))))))))..)))))....))))))).)))))))))))..)))..	0.53333
433	552	37	-33.7	-0.11	0.39	14.81	CAUCGGAAUCAUUGGCCUCCUGCUGACUACAGCCAUGGCAGCAGAGAUCACUAGACGCGGGAGUGCAUACUACAUGUACUUGGAUAGGAGCGAUGCCGGGAAGGCCAUUUCGUUUGCUAC	...(((((....(((((((((((((....))))...((((.....(.((.(((..(....((((((((.....)))))))))..))))).)..))))))).)))))))))))........	...(((((....(((((((((((((....))))...((((.......((.(((..(....((((((((.....)))))))))..)))))....))))))).)))))))))))........	0.53333
434	553	37	-33.7	0.03	0.43	19.33	AUCGGAAUCAUUGGCCUCCUGCUGACUACAGCCAUGGCAGCAGAGAUCACUAGACGCGGGAGUGCAUACUACAUGUACUUGGAUAGGAGCGAUGCCGGGAAGGCCAUUUCGUUUGCUACC	..(((((....(((((((((((((....))))...((((.....(.((.(((..(....((((((((.....)))))))))..))))).)..))))))).))))))))))).........	..(((((....(((((.(((((((....))))...((((.......((.(((..(....((((((((.....)))))))))..)))))....)))))))..)))))))))).........	0.53333
435	554	37	-33.7	-0.14	0.42	36.11	UCGGAAUCAUUGGCCUCCUGCUGACUACAGCCAUGGCAGCAGAGAUCACUAGACGCGGGAGUGCAUACUACAUGUACUUGGAUAGGAGCGAUGCCGGGAAGGCCAUUUCGUUUGCUACCA	.(((((....(((((((((((((....))))...((((.....(.((.(((..(....((((((((.....)))))))))..))))).)..))))))).)))))))))))..........	...........((((....((((.............))))..................((((((((.....)))))))).....................))))................	0.53333
436	555	37	-33.6	0.13	0.53	34.29	CGGAAUCAUUGGCCUCCUGCUGACUACAGCCAUGGCAGCAGAGAUCACUAGACGCGGGAGUGCAUACUACAUGUACUUGGAUAGGAGCGAUGCCGGGAAGGCCAUUUCGUUUGCUACCAC	(((((....(((((((((((((....))))...((((.....(.((.(((..(....((((((((.....)))))))))..))))).)..))))))).)))))))))))...........	..........((((.((.((((....))))...((((.......((.(((..(....((((((((.....)))))))))..)))))....)))).))..)))).................	0.54167
437	556	37	-32.3	0.28	0.52	33.17	GGAAUCAUUGGCCUCCUGCUGACUACAGCCAUGGCAGCAGAGAUCACUAGACGCGGGAGUGCAUACUACAUGUACUUGGAUAGGAGCGAUGCCGGGAAGGCCAUUUCGUUUGCUACCACA	((((....(((((((((((((....))))...((((.....(.((.(((..(....((((((((.....)))))))))..))))).)..))))))).)))))))))).............	........(((((.(((((((....))))...((((.......((.(((..(....((((((((.....)))))))))..)))))....)))))))..))))).................	0.53333
438	557	37	-32.1	0.03	0.5	34.03	GAAUCAUUGGCCUCCUGCUGACUACAGCCAUGGCAGCAGAGAUCACUAGACGCGGGAGUGCAUACUACAUGUACUUGGAUAGGAGCGAUGCCGGGAAGGCCAUUUCGUUUGCUACCACAU	(..((..(((.(((.(((((.(((......))))))))))).)))...))..)..((((((((.....))))))))((.(((((((((.(((.....)))....)))))).)))))....	...............(((((.((........))))))).................((((((((.....)))))))).........((..................)).............	0.525
439	558	37	-32	-0.23	0.39	31.37	AAUCAUUGGCCUCCUGCUGACUACAGCCAUGGCAGCAGAGAUCACUAGACGCGGGAGUGCAUACUACAUGUACUUGGAUAGGAGCGAUGCCGGGAAGGCCAUUUCGUUUGCUACCACAUU	......(((.(((.(((((.(((......))))))))))).)))..........((((((((.....))))))))((.(((((((((.(((.....)))....)))))).))))).....	..............(((((.((........))))))).................((((((((.....))))))))((.(((.(((((..((.....)).....)))))..))))).....	0.51667
440	559	37	-32	0.08	0.5	31.05	AUCAUUGGCCUCCUGCUGACUACAGCCAUGGCAGCAGAGAUCACUAGACGCGGGAGUGCAUACUACAUGUACUUGGAUAGGAGCGAUGCCGGGAAGGCCAUUUCGUUUGCUACCACAUUG	.....(((.(((.(((((.(((......))))))))))).)))..........((((((((.....))))))))((.(((((((((.(((.....)))....)))))).)))))......	.............(((((.(((......)))))))).................((((((((.....))))))))((.(((.(((((..((.....)).....)))))..)))))......	0.525
441	560	37	-32	0.63	0.72	33.9	UCAUUGGCCUCCUGCUGACUACAGCCAUGGCAGCAGAGAUCACUAGACGCGGGAGUGCAUACUACAUGUACUUGGAUAGGAGCGAUGCCGGGAAGGCCAUUUCGUUUGCUACCACAUUGG	....(((.(((.(((((.(((......))))))))))).)))..........((((((((.....))))))))((.(((((((((.(((.....)))....)))))).))))).......	............(((((.((........))))))).................((((((((.....))))))))........(((...((.....))......)))...............	0.53333
442	561	37	-32.9	0.32	0.61	29.09	CAUUGGCCUCCUGCUGACUACAGCCAUGGCAGCAGAGAUCACUAGACGCGGGAGUGCAUACUACAUGUACUUGGAUAGGAGCGAUGCCGGGAAGGCCAUUUCGUUUGCUACCACAUUGGG	...(((((((((((((....))))...((((.....(.((.(((..(....((((((((.....)))))))))..))))).)..))))))).))))))............(((...))).	...(((((.(((((((....))))...((((.......((.(((..(....((((((((.....)))))))))..)))))....)))))))..)))))............((.....)).	0.54167
443	562	37	-32.9	0.36	0.63	28.54	AUUGGCCUCCUGCUGACUACAGCCAUGGCAGCAGAGAUCACUAGACGCGGGAGUGCAUACUACAUGUACUUGGAUAGGAGCGAUGCCGGGAAGGCCAUUUCGUUUGCUACCACAUUGGGA	..(((((((((((((....))))...((((.....(.((.(((..(....((((((((.....)))))))))..))))).)..))))))).))))))............(((...)))..	..(((((.(((((((....))))...((((.......((.(((..(....((((((((.....)))))))))..)))))....)))))))..)))))............((.....))..	0.53333
444	563	37	-32.9	0.51	0.63	26.44	UUGGCCUCCUGCUGACUACAGCCAUGGCAGCAGAGAUCACUAGACGCGGGAGUGCAUACUACAUGUACUUGGAUAGGAGCGAUGCCGGGAAGGCCAUUUCGUUUGCUACCACAUUGGGAG	.(((((((((((((....))))...((((.....(.((.(((..(....((((((((.....)))))))))..))))).)..))))))).))))))............(((...)))...	.(((((.(((((((....))))...((((.......((.(((..(....((((((((.....)))))))))..)))))....)))))))..)))))............((.....))...	0.54167
445	564	37	-34.2	0.43	0.67	17.07	UGGCCUCCUGCUGACUACAGCCAUGGCAGCAGAGAUCACUAGACGCGGGAGUGCAUACUACAUGUACUUGGAUAGGAGCGAUGCCGGGAAGGCCAUUUCGUUUGCUACCACAUUGGGAGU	(((((((((((((....))))...((((.....(.((.(((..(....((((((((.....)))))))))..))))).)..))))))).))))))........(((.(((...))).)))	(((((.(((((((....))))...((((.......((.(((..(....((((((((.....)))))))))..)))))....)))))))..)))))........(((.(((...))).)))	0.54167
446	565	37	-34.3	0.23	0.52	17.88	GGCCUCCUGCUGACUACAGCCAUGGCAGCAGAGAUCACUAGACGCGGGAGUGCAUACUACAUGUACUUGGAUAGGAGCGAUGCCGGGAAGGCCAUUUCGUUUGCUACCACAUUGGGAGUG	((((((((((((....))))...((((.....(.((.(((..(....((((((((.....)))))))))..))))).)..))))))).))))).........(((.(((...))).))).	((((.(((((((....))))...((((.......((.(((..(....((((((((.....)))))))))..)))))....)))))))..)))).........(((.(((...))).))).	0.55
447	566	37	-33.5	0.51	0.62	17.75	GCCUCCUGCUGACUACAGCCAUGGCAGCAGAGAUCACUAGACGCGGGAGUGCAUACUACAUGUACUUGGAUAGGAGCGAUGCCGGGAAGGCCAUUUCGUUUGCUACCACAUUGGGAGUGA	..(((.(((((.(((......))))))))))).(((((........((((((((.....))))))))((.(((((((((.(((.....)))....)))))).)))))........)))))	..((.((((((.(((......))))))))))).(((((........((((((((.....))))))))((.(((((((((.(((.....)))....)))))).)))))........)))))	0.54167
448	567	37	-34	-0.04	0.46	14.52	CCUCCUGCUGACUACAGCCAUGGCAGCAGAGAUCACUAGACGCGGGAGUGCAUACUACAUGUACUUGGAUAGGAGCGAUGCCGGGAAGGCCAUUUCGUUUGCUACCACAUUGGGAGUGAA	.(((.(((((.(((......))))))))))).(((((........((((((((.....))))))))((.(((((((((.(((.....)))....)))))).)))))........))))).	.((.((((((.(((......))))))))))).(((((........((((((((.....))))))))((.(((((((((.(((.....)))....)))))).)))))........))))).	0.53333
449	568	37	-34	-0.14	0.47	21.37	CUCCUGCUGACUACAGCCAUGGCAGCAGAGAUCACUAGACGCGGGAGUGCAUACUACAUGUACUUGGAUAGGAGCGAUGCCGGGAAGGCCAUUUCGUUUGCUACCACAUUGGGAGUGAAC	.((((((((.(((......))))))))).))(((((........((((((((.....))))))))((.(((((((((.(((.....)))....)))))).)))))........)))))..	...((((((.(((......)))))))))...(((((........((((((((.....))))))))((.(((((((((.(((.....)))....)))))).)))))........)))))..	0.53333
450	569	37	-33.8	-0.33	0.3	24.81	UCCUGCUGACUACAGCCAUGGCAGCAGAGAUCACUAGACGCGGGAGUGCAUACUACAUGUACUUGGAUAGGAGCGAUGCCGGGAAGGCCAUUUCGUUUGCUACCACAUUGGGAGUGAACA	((((((((.(((......))))))))).))(((((........((((((((.....))))))))((.(((((((((.(((.....)))....)))))).)))))........)))))...	.(((((((.(((......))))))))).)..............((((((((.....)))))))).............(((.....)))......((((((...(.....)...)))))).	0.525
451	570	37	-33.8	-0.21	0.41	24.47	CCUGCUGACUACAGCCAUGGCAGCAGAGAUCACUAGACGCGGGAGUGCAUACUACAUGUACUUGGAUAGGAGCGAUGCCGGGAAGGCCAUUUCGUUUGCUACCACAUUGGGAGUGAACAA	.((((((.(((......)))))))))..(((.((........((((((((.....)))))))).......)).)))(((.....)))......(((((((.(((...))).)))))))..	.((((((.(((......)))))))))................((((((((.....)))))))).............(((.....)))......((((((.............))))))..	0.525
452	571	37	-33.4	-0.19	0.4	24.58	CUGCUGACUACAGCCAUGGCAGCAGAGAUCACUAGACGCGGGAGUGCAUACUACAUGUACUUGGAUAGGAGCGAUGCCGGGAAGGCCAUUUCGUUUGCUACCACAUUGGGAGUGAACAAG	((((((.(((......)))))))))..(((.((........((((((((.....)))))))).......)).)))(((.....)))......(((((((.(((...))).)))))))...	((((((.(((......)))))))))................((((((((.....)))))))).............(((.....)))......((((((...(.....)...))))))...	0.525
453	572	37	-30.8	0.29	0.56	33.05	UGCUGACUACAGCCAUGGCAGCAGAGAUCACUAGACGCGGGAGUGCAUACUACAUGUACUUGGAUAGGAGCGAUGCCGGGAAGGCCAUUUCGUUUGCUACCACAUUGGGAGUGAACAAGU	.((((....)))).(((((.(((..(.((.(((..(....((((((((.....)))))))))..))))).)..))).......)))))...(((((((.(((...))).)))))))....	.((((.((........))))))........(((.......((((((((.....))))))))...)))........((.....)).......(((((((.((.....)).)))))))....	0.51667
454	573	37	-31.9	-0.09	0.37	26.46	GCUGACUACAGCCAUGGCAGCAGAGAUCACUAGACGCGGGAGUGCAUACUACAUGUACUUGGAUAGGAGCGAUGCCGGGAAGGCCAUUUCGUUUGCUACCACAUUGGGAGUGAACAAGUG	((((.(((......)))))))....(((.((........((((((((.....)))))))).......)).)))(((.....)))(((((.(((((((.(((...))).))))))))))))	...........................(.(((..(....((((((((.....)))))))))..))))........(.....)..(((((.(((((((.(((...))).))))))))))))	0.525
455	574	37	-30.6	0.44	0.6	15.95	CUGACUACAGCCAUGGCAGCAGAGAUCACUAGACGCGGGAGUGCAUACUACAUGUACUUGGAUAGGAGCGAUGCCGGGAAGGCCAUUUCGUUUGCUACCACAUUGGGAGUGAACAAGUGC	.........(((....(.(((..(.((.(((..(....((((((((.....)))))))))..))))).)..))).)....)))(((((.(((((((.(((...))).)))))))))))).	.........(((..((((.......((.(((..(....((((((((.....)))))))))..)))))....)))).....)))(((((.(((((((.(((...))).)))))))))))).	0.525
456	575	37	-31.9	-0.01	0.43	9.49	UGACUACAGCCAUGGCAGCAGAGAUCACUAGACGCGGGAGUGCAUACUACAUGUACUUGGAUAGGAGCGAUGCCGGGAAGGCCAUUUCGUUUGCUACCACAUUGGGAGUGAACAAGUGCC	.........((.(((((.....(.((.(((..(....((((((((.....)))))))))..))))).)..)))))))..(((.((((.(((((((.(((...))).))))))))))))))	.........((.(((((.......((.(((..(....((((((((.....)))))))))..)))))....)))))))..((.(((((.(((((((.(((...))).))))))))))))))	0.525
457	576	37	-33.2	-0.17	0.43	8.47	GACUACAGCCAUGGCAGCAGAGAUCACUAGACGCGGGAGUGCAUACUACAUGUACUUGGAUAGGAGCGAUGCCGGGAAGGCCAUUUCGUUUGCUACCACAUUGGGAGUGAACAAGUGCCA	........((.(((((.....(.((.(((..(....((((((((.....)))))))))..))))).)..)))))))..(((.((((.(((((((.(((...))).)))))))))))))).	........((.(((((.......((.(((..(....((((((((.....)))))))))..)))))....)))))))..(((.((((.(((((((.(((...))).)))))))))))))).	0.525
458	577	37	-33.2	-0.31	0.33	8.54	ACUACAGCCAUGGCAGCAGAGAUCACUAGACGCGGGAGUGCAUACUACAUGUACUUGGAUAGGAGCGAUGCCGGGAAGGCCAUUUCGUUUGCUACCACAUUGGGAGUGAACAAGUGCCAC	.......((.(((((.....(.((.(((..(....((((((((.....)))))))))..))))).)..)))))))..(((.((((.(((((((.(((...))).))))))))))))))..	.......((.(((((.......((.(((..(....((((((((.....)))))))))..)))))....)))))))..((..((((.(((((((.(((...))).))))))))))).))..	0.525
459	578	37	-33.2	0.11	0.55	8.63	CUACAGCCAUGGCAGCAGAGAUCACUAGACGCGGGAGUGCAUACUACAUGUACUUGGAUAGGAGCGAUGCCGGGAAGGCCAUUUCGUUUGCUACCACAUUGGGAGUGAACAAGUGCCACG	......((.(((((.....(.((.(((..(....((((((((.....)))))))))..))))).)..)))))))..(((.((((.(((((((.(((...))).))))))))))))))...	......((.(((((.......((.(((..(....((((((((.....)))))))))..)))))....)))))))..((..((((.(((((((.(((...))).))))))))))).))...	0.53333
460	579	37	-33.2	-0.21	0.41	8.89	UACAGCCAUGGCAGCAGAGAUCACUAGACGCGGGAGUGCAUACUACAUGUACUUGGAUAGGAGCGAUGCCGGGAAGGCCAUUUCGUUUGCUACCACAUUGGGAGUGAACAAGUGCCACGU	.....((.(((((.....(.((.(((..(....((((((((.....)))))))))..))))).)..)))))))..(((.((((.(((((((.(((...))).))))))))))))))....	.....((.(((((.......((.(((..(....((((((((.....)))))))))..)))))....)))))))..((..((((.(((((((.(((...))).))))))))))).))....	0.525
461	580	37	-33.2	-0.49	0.28	9.13	ACAGCCAUGGCAGCAGAGAUCACUAGACGCGGGAGUGCAUACUACAUGUACUUGGAUAGGAGCGAUGCCGGGAAGGCCAUUUCGUUUGCUACCACAUUGGGAGUGAACAAGUGCCACGUA	....((.(((((.....(.((.(((..(....((((((((.....)))))))))..))))).)..)))))))..(((.((((.(((((((.(((...))).)))))))))))))).....	....((.(((((.......((.(((..(....((((((((.....)))))))))..)))))....)))))))..((..((((.(((((((.(((...))).))))))))))).)).....	0.525
462	581	37	-33.2	-0.14	0.38	9.08	CAGCCAUGGCAGCAGAGAUCACUAGACGCGGGAGUGCAUACUACAUGUACUUGGAUAGGAGCGAUGCCGGGAAGGCCAUUUCGUUUGCUACCACAUUGGGAGUGAACAAGUGCCACGUAC	...((.(((((.....(.((.(((..(....((((((((.....)))))))))..))))).)..)))))))..(((.((((.(((((((.(((...))).))))))))))))))......	...((.(((((.......((.(((..(....((((((((.....)))))))))..)))))....)))))))..((..((((.(((((((.(((...))).))))))))))).))......	0.53333
463	582	37	-33.2	-0.53	0.28	9.18	AGCCAUGGCAGCAGAGAUCACUAGACGCGGGAGUGCAUACUACAUGUACUUGGAUAGGAGCGAUGCCGGGAAGGCCAUUUCGUUUGCUACCACAUUGGGAGUGAACAAGUGCCACGUACA	..((.(((((.....(.((.(((..(....((((((((.....)))))))))..))))).)..)))))))..(((.((((.(((((((.(((...))).)))))))))))))).......	..((.(((((.......((.(((..(....((((((((.....)))))))))..)))))....)))))))..((..((((.(((((((.(((...))).))))))))))).)).......	0.525
464	583	37	-33.2	0.08	0.49	9.05	GCCAUGGCAGCAGAGAUCACUAGACGCGGGAGUGCAUACUACAUGUACUUGGAUAGGAGCGAUGCCGGGAAGGCCAUUUCGUUUGCUACCACAUUGGGAGUGAACAAGUGCCACGUACAG	.((.(((((.....(.((.(((..(....((((((((.....)))))))))..))))).)..)))))))..(((.((((.(((((((.(((...))).))))))))))))))........	.((.(((((.......((.(((..(....((((((((.....)))))))))..)))))....)))))))..((..((((.(((((((.(((...))).))))))))))).))........	0.53333
465	584	37	-33	-0.42	0.33	8.94	CCAUGGCAGCAGAGAUCACUAGACGCGGGAGUGCAUACUACAUGUACUUGGAUAGGAGCGAUGCCGGGAAGGCCAUUUCGUUUGCUACCACAUUGGGAGUGAACAAGUGCCACGUACAGA	((.(((((.....(.((.(((..(....((((((((.....)))))))))..))))).)..)))))))..(((.((((.(((((((.(((...))).)))))))))))))).........	((.(((((.......((.(((..(....((((((((.....)))))))))..)))))....)))))))..((..((((.(((((((.(((...))).))))))))))).)).........	0.525
466	585	37	-30.4	0.35	0.62	19.16	CAUGGCAGCAGAGAUCACUAGACGCGGGAGUGCAUACUACAUGUACUUGGAUAGGAGCGAUGCCGGGAAGGCCAUUUCGUUUGCUACCACAUUGGGAGUGAACAAGUGCCACGUACAGAU	...((((.....(.((.(((..(....((((((((.....)))))))))..))))).)..)))).....(((.((((.(((((((.(((...))).))))))))))))))..........	...((((.......((.(((..(....((((((((.....)))))))))..)))))....)))).....((..((((.(((((((.(((...))).))))))))))).))..........	0.51667
467	586	37	-30.4	0.21	0.5	20.57	AUGGCAGCAGAGAUCACUAGACGCGGGAGUGCAUACUACAUGUACUUGGAUAGGAGCGAUGCCGGGAAGGCCAUUUCGUUUGCUACCACAUUGGGAGUGAACAAGUGCCACGUACAGAUC	..((((.....(.((.(((..(....((((((((.....)))))))))..))))).)..)))).....(((.((((.(((((((.(((...))).))))))))))))))...........	..((((.......((.(((..(....((((((((.....)))))))))..)))))....)))).....((..((((.(((((((.(((...))).))))))))))).))...........	0.51667
468	587	37	-30.6	0.28	0.58	20.48	UGGCAGCAGAGAUCACUAGACGCGGGAGUGCAUACUACAUGUACUUGGAUAGGAGCGAUGCCGGGAAGGCCAUUUCGUUUGCUACCACAUUGGGAGUGAACAAGUGCCACGUACAGAUCA	(((((.....(.((.(((..(....((((((((.....)))))))))..))))).)..)))))....(((.((((.(((((((.(((...))).))))))))))))))............	.((((.......((.(((..(....((((((((.....)))))))))..)))))....)))).....((..((((.(((((((.(((...))).))))))))))).))............	0.51667
469	588	37	-30.6	0.14	0.54	18.65	GGCAGCAGAGAUCACUAGACGCGGGAGUGCAUACUACAUGUACUUGGAUAGGAGCGAUGCCGGGAAGGCCAUUUCGUUUGCUACCACAUUGGGAGUGAACAAGUGCCACGUACAGAUCAU	((((.....(.((.(((..(....((((((((.....)))))))))..))))).)..)))).....(((.((((.(((((((.(((...))).)))))))))))))).............	((((.......((.(((..(....((((((((.....)))))))))..)))))....)))).....((..((((.(((((((.(((...))).))))))))))).)).............	0.51667
470	589	37	-30.3	0.46	0.61	23.54	GCAGCAGAGAUCACUAGACGCGGGAGUGCAUACUACAUGUACUUGGAUAGGAGCGAUGCCGGGAAGGCCAUUUCGUUUGCUACCACAUUGGGAGUGAACAAGUGCCACGUACAGAUCAUG	........((((.....(((.((((((((((.....)))))))).............(((.....)))(((((.(((((((.(((...))).)))))))))))))).)))...))))...	........((...(((.......((((((((.....))))))))...)))..................(((((.(((((((.(((...))).))))))))))))...........))...	0.51667
471	590	37	-30.4	0.38	0.58	24.77	CAGCAGAGAUCACUAGACGCGGGAGUGCAUACUACAUGUACUUGGAUAGGAGCGAUGCCGGGAAGGCCAUUUCGUUUGCUACCACAUUGGGAGUGAACAAGUGCCACGUACAGAUCAUGG	...((..((((.....(((.((((((((((.....)))))))).............(((.....)))(((((.(((((((.(((...))).)))))))))))))).)))...)))).)).	.......((((.....(((.((((((((((.....)))))))).............(((.....)))(((((.(((((((.(((...))).)))))))))))))).)))...))))....	0.51667
472	591	37	-30.4	-0.05	0.47	23.8	AGCAGAGAUCACUAGACGCGGGAGUGCAUACUACAUGUACUUGGAUAGGAGCGAUGCCGGGAAGGCCAUUUCGUUUGCUACCACAUUGGGAGUGAACAAGUGCCACGUACAGAUCAUGGA	..((..((((.....(((.((((((((((.....)))))))).............(((.....)))(((((.(((((((.(((...))).)))))))))))))).)))...)))).))..	......((((.....(((.((((((((((.....)))))))).............(((.....)))(((((.(((((((.((.....)).)))))))))))))).)))...)))).....	0.50833
473	592	37	-30.4	0.25	0.57	23.64	GCAGAGAUCACUAGACGCGGGAGUGCAUACUACAUGUACUUGGAUAGGAGCGAUGCCGGGAAGGCCAUUUCGUUUGCUACCACAUUGGGAGUGAACAAGUGCCACGUACAGAUCAUGGAC	.((..((((.....(((.((((((((((.....)))))))).............(((.....)))(((((.(((((((.(((...))).)))))))))))))).)))...)))).))...	.....((((.....(((.((((((((((.....)))))))).............(((.....)))(((((.(((((((.((.....)).)))))))))))))).)))...))))......	0.51667
474	593	37	-30.3	0.39	0.57	18.69	CAGAGAUCACUAGACGCGGGAGUGCAUACUACAUGUACUUGGAUAGGAGCGAUGCCGGGAAGGCCAUUUCGUUUGCUACCACAUUGGGAGUGAACAAGUGCCACGUACAGAUCAUGGACC	....((((.....(((.((((((((((.....)))))))).............(((.....)))(((((.(((((((.(((...))).)))))))))))))).)))...)))).......	....((((.....(((.((((((((((.....)))))))).............(((.....)))(((((.(((((((.((.....)).)))))))))))))).)))...)))).......	0.51667
475	594	37	-30.3	0.26	0.59	18.65	AGAGAUCACUAGACGCGGGAGUGCAUACUACAUGUACUUGGAUAGGAGCGAUGCCGGGAAGGCCAUUUCGUUUGCUACCACAUUGGGAGUGAACAAGUGCCACGUACAGAUCAUGGACCU	...((((.....(((.((((((((((.....)))))))).............(((.....)))(((((.(((((((.(((...))).)))))))))))))).)))...))))........	...((((.....(((.((((((((((.....)))))))).............(((.....)))(((((.(((((((.((.....)).)))))))))))))).)))...))))........	0.50833
476	595	37	-30.3	0.37	0.6	22.14	GAGAUCACUAGACGCGGGAGUGCAUACUACAUGUACUUGGAUAGGAGCGAUGCCGGGAAGGCCAUUUCGUUUGCUACCACAUUGGGAGUGAACAAGUGCCACGUACAGAUCAUGGACCUC	..((((.....(((.((((((((((.....)))))))).............(((.....)))(((((.(((((((.(((...))).)))))))))))))).)))...)))).........	..((((.....(((.((((((((((.....)))))))).............(((.....)))(((((.(((((((.((.....)).)))))))))))))).)))...)))).........	0.51667
477	596	37	-30.3	0.16	0.51	30.68	AGAUCACUAGACGCGGGAGUGCAUACUACAUGUACUUGGAUAGGAGCGAUGCCGGGAAGGCCAUUUCGUUUGCUACCACAUUGGGAGUGAACAAGUGCCACGUACAGAUCAUGGACCUCG	.((((.....(((.((((((((((.....)))))))).............(((.....)))(((((.(((((((.(((...))).)))))))))))))).)))...))))..........	.(((.............((((((.......))))))..............(((.....)))(((((.(((((((.(((...))).))))))))))))..........)))..........	0.51667
478	597	37	-31.4	0.53	0.68	30.36	GAUCACUAGACGCGGGAGUGCAUACUACAUGUACUUGGAUAGGAGCGAUGCCGGGAAGGCCAUUUCGUUUGCUACCACAUUGGGAGUGAACAAGUGCCACGUACAGAUCAUGGACCUCGG	............((((.((.(((......(((((.(((...........(((.....)))(((((.(((((((.(((...))).))))))))))))))).)))))....))).)))))).	............((((.((.(((......(((((.(((...........(((.....)))(((((.(((((((.(((...))).))))))))))))))).)))))....))).)))))).	0.525
479	598	37	-32.7	-0.13	0.48	18.96	AUCACUAGACGCGGGAGUGCAUACUACAUGUACUUGGAUAGGAGCGAUGCCGGGAAGGCCAUUUCGUUUGCUACCACAUUGGGAGUGAACAAGUGCCACGUACAGAUCAUGGACCUCGGG	.........(.((((.((.(((......(((((.(((...........(((.....)))(((((.(((((((.(((...))).))))))))))))))).)))))....))).)))))).)	.........(.((((.((.(((......(((((.(((...........(((.....)))(((((.(((((((.(((...))).))))))))))))))).)))))....))).)))))).)	0.525
480	599	37	-33.3	0.15	0.54	16.93	UCACUAGACGCGGGAGUGCAUACUACAUGUACUUGGAUAGGAGCGAUGCCGGGAAGGCCAUUUCGUUUGCUACCACAUUGGGAGUGAACAAGUGCCACGUACAGAUCAUGGACCUCGGGC	........(.((((.((.(((......(((((.(((...........(((.....)))(((((.(((((((.(((...))).))))))))))))))).)))))....))).)))))).).	........(.((((.((.(((......(((((.(((...........(((.....)))(((((.(((((((.(((...))).))))))))))))))).)))))....))).)))))).).	0.53333
481	600	37	-33.3	0.29	0.61	31.19	CACUAGACGCGGGAGUGCAUACUACAUGUACUUGGAUAGGAGCGAUGCCGGGAAGGCCAUUUCGUUUGCUACCACAUUGGGAGUGAACAAGUGCCACGUACAGAUCAUGGACCUCGGGCA	.......(.((((.((.(((......(((((.(((...........(((.....)))(((((.(((((((.(((...))).))))))))))))))).)))))....))).)))))).)..	.......(.((((.((.(((......(((((.(((...........(((.....)))......(((((((.(((...))).))))))).....))).)))))....))).)))))).)..	0.53333
482	601	37	-33.3	0.02	0.45	33.69	ACUAGACGCGGGAGUGCAUACUACAUGUACUUGGAUAGGAGCGAUGCCGGGAAGGCCAUUUCGUUUGCUACCACAUUGGGAGUGAACAAGUGCCACGUACAGAUCAUGGACCUCGGGCAC	......(.((((.((.(((......(((((.(((...........(((.....)))(((((.(((((((.(((...))).))))))))))))))).)))))....))).)))))).)...	......(.((((.((.(((......(((((.(((...........(((.....)))......(((((((.(((...))).))))))).....))).)))))....))).)))))).)...	0.53333
483	602	37	-33.3	-0.01	0.44	35.72	CUAGACGCGGGAGUGCAUACUACAUGUACUUGGAUAGGAGCGAUGCCGGGAAGGCCAUUUCGUUUGCUACCACAUUGGGAGUGAACAAGUGCCACGUACAGAUCAUGGACCUCGGGCACA	.....(.((((.((.(((......(((((.(((...........(((.....)))(((((.(((((((.(((...))).))))))))))))))).)))))....))).)))))).)....	.....(.((((.((.((.......(((((.(((...........(((.....)))......(((((((.(((...))).))))))).....))).))))).....)).)))))).)....	0.53333
484	603	37	-33.3	-0.17	0.42	31.23	UAGACGCGGGAGUGCAUACUACAUGUACUUGGAUAGGAGCGAUGCCGGGAAGGCCAUUUCGUUUGCUACCACAUUGGGAGUGAACAAGUGCCACGUACAGAUCAUGGACCUCGGGCACAU	....(.((((.((.(((......(((((.(((...........(((.....)))(((((.(((((((.(((...))).))))))))))))))).)))))....))).)))))).).....	....(.((((.((.(((......(((((.(((...........(((.....)))......(((((((.(((...))).))))))).....))).)))))....))).)))))).).....	0.525
485	604	37	-33.3	-0.1	0.47	31.81	AGACGCGGGAGUGCAUACUACAUGUACUUGGAUAGGAGCGAUGCCGGGAAGGCCAUUUCGUUUGCUACCACAUUGGGAGUGAACAAGUGCCACGUACAGAUCAUGGACCUCGGGCACAUG	...(.((((.((.(((......(((((.(((...........(((.....)))(((((.(((((((.(((...))).))))))))))))))).)))))....))).)))))).)......	...(.((((.((.(((......(((((.(((...........(((.....)))......(((((((.(((...))).))))))).....))).)))))....))).)))))).)......	0.53333
486	605	37	-33.5	0.2	0.56	32.88	GACGCGGGAGUGCAUACUACAUGUACUUGGAUAGGAGCGAUGCCGGGAAGGCCAUUUCGUUUGCUACCACAUUGGGAGUGAACAAGUGCCACGUACAGAUCAUGGACCUCGGGCACAUGU	(.(.((((.((.(((......(((((.(((...........(((.....)))(((((.(((((((.(((...))).))))))))))))))).)))))....))).)))))).))......	..(.((((.((.(((......(((((.(((...........(((.....)))......(((((((.(((...))).))))))).....))).)))))....))).)))))).).......	0.53333
487	606	37	-33.3	0.32	0.64	39.48	ACGCGGGAGUGCAUACUACAUGUACUUGGAUAGGAGCGAUGCCGGGAAGGCCAUUUCGUUUGCUACCACAUUGGGAGUGAACAAGUGCCACGUACAGAUCAUGGACCUCGGGCACAUGUG	.(.((((.((.(((......(((((.(((...........(((.....)))(((((.(((((((.(((...))).))))))))))))))).)))))....))).)))))).)........	......((((((((.....)))))))).............(((.....)))......(((((((.((.....)).)))))))......................................	0.53333
488	607	37	-32.6	0.5	0.62	37.99	CGCGGGAGUGCAUACUACAUGUACUUGGAUAGGAGCGAUGCCGGGAAGGCCAUUUCGUUUGCUACCACAUUGGGAGUGAACAAGUGCCACGUACAGAUCAUGGACCUCGGGCACAUGUGU	(.((((.((.(((......(((((.(((...........(((.....)))(((((.(((((((.(((...))).))))))))))))))).)))))....))).)))))).).........	.....((((((((.....)))))))).............(((.....)))......(((((((.((.....)).))))))).......................................	0.53333
489	608	37	-31.8	0.78	0.75	43.57	GCGGGAGUGCAUACUACAUGUACUUGGAUAGGAGCGAUGCCGGGAAGGCCAUUUCGUUUGCUACCACAUUGGGAGUGAACAAGUGCCACGUACAGAUCAUGGACCUCGGGCACAUGUGUG	.((((.((.(((......(((((.(((...........(((.....)))(((((.(((((((.(((...))).))))))))))))))).)))))....))).))))))..(((....)))	....((((((((.....)))))))).............(((.....)))......(((((((.((.....)).)))))))........................................	0.53333
490	609	37	-32.8	0.26	0.59	38.39	CGGGAGUGCAUACUACAUGUACUUGGAUAGGAGCGAUGCCGGGAAGGCCAUUUCGUUUGCUACCACAUUGGGAGUGAACAAGUGCCACGUACAGAUCAUGGACCUCGGGCACAUGUGUGA	((((.((.(((......(((((.(((...........(((.....)))(((((.(((((((.(((...))).))))))))))))))).)))))....))).))))))..(((....))).	((((.((.(((......(((((.(((...........(((.....)))......(((((((.((.....)).))))))).....))).)))))....))).)))))).............	0.525
491	610	37	-31.4	0.52	0.66	36.48	GGGAGUGCAUACUACAUGUACUUGGAUAGGAGCGAUGCCGGGAAGGCCAUUUCGUUUGCUACCACAUUGGGAGUGAACAAGUGCCACGUACAGAUCAUGGACCUCGGGCACAUGUGUGAC	..((((((((.....))))))))((.(((((((((.(((.....)))....)))))).))))).............(((.(((((.((..((.....)).....))))))).))).....	..((((((((.....)))))))).........((..(((.....))).....))...((.............))......(((((.(..................)))))).........	0.525
492	611	37	-32.2	0.18	0.53	38.38	GGAGUGCAUACUACAUGUACUUGGAUAGGAGCGAUGCCGGGAAGGCCAUUUCGUUUGCUACCACAUUGGGAGUGAACAAGUGCCACGUACAGAUCAUGGACCUCGGGCACAUGUGUGACG	.((((((((.....))))))))((.(((((((((.(((.....)))....)))))).))))).........((.((((.(((((.((..((.....)).....))))))).))).).)).	.((((((((.....)))))))).........((..(((.....))).....))..........................(((((.....................)))))..........	0.525
493	612	37	-32.4	0.27	0.56	40.37	GAGUGCAUACUACAUGUACUUGGAUAGGAGCGAUGCCGGGAAGGCCAUUUCGUUUGCUACCACAUUGGGAGUGAACAAGUGCCACGUACAGAUCAUGGACCUCGGGCACAUGUGUGACGC	((((((((.....))))))))((.(((((((((.(((.....)))....)))))).)))))....(((.(.(.....).).)))(((.((.(.((((..((...))..))))).))))).	((((((((.....)))))))).............(((.....)))........((((.............))))..............................................	0.525
494	613	37	-33	0.08	0.47	25.69	AGUGCAUACUACAUGUACUUGGAUAGGAGCGAUGCCGGGAAGGCCAUUUCGUUUGCUACCACAUUGGGAGUGAACAAGUGCCACGUACAGAUCAUGGACCUCGGGCACAUGUGUGACGCC	(((((((.....)))))))(((.(((((((((.(((.....)))....)))))).)))))).....((.((.((((.(((((.((..((.....)).....))))))).))).).)).))	(((((((.....)))))))(((.(((((((((.(((.....)))....)))))).)))))).....((.((..(((.(((((.((..((.....)).....))))))).)))...)).))	0.525
495	614	37	-33.9	-0.3	0.31	17.19	GUGCAUACUACAUGUACUUGGAUAGGAGCGAUGCCGGGAAGGCCAUUUCGUUUGCUACCACAUUGGGAGUGAACAAGUGCCACGUACAGAUCAUGGACCUCGGGCACAUGUGUGACGCCA	((((((.....)))))).(((.(((((((((.(((.....)))....)))))).)))))).....((.((.((((.(((((.((..((.....)).....))))))).))).).)).)).	((((((.....)))))).(((.(((((((((.(((.....)))....)))))).)))))).....((.((..(((.(((((.((..((.....)).....))))))).)))...)).)).	0.525
496	615	37	-30.5	0.7	0.79	37.7	UGCAUACUACAUGUACUUGGAUAGGAGCGAUGCCGGGAAGGCCAUUUCGUUUGCUACCACAUUGGGAGUGAACAAGUGCCACGUACAGAUCAUGGACCUCGGGCACAUGUGUGACGCCAC	(((((.....)))))..(((.(((((((((.(((.....)))....)))))).)))))).....((.((.((((.(((((.((..((.....)).....))))))).))).).)).))..	.((((.....))))...(((.(((((((((.(((.....)))....)))))).))))))........((..(((.(((((.((..((.....)).....))))))).)))...)).....	0.525
497	616	37	-29.7	0.78	0.76	45.01	GCAUACUACAUGUACUUGGAUAGGAGCGAUGCCGGGAAGGCCAUUUCGUUUGCUACCACAUUGGGAGUGAACAAGUGCCACGUACAGAUCAUGGACCUCGGGCACAUGUGUGACGCCACC	((((.....))))...(((.(((((((((.(((.....)))....)))))).)))))).....((.((.((((.(((((.((..((.....)).....))))))).))).).)).))...	.................((.(((.(((((.(((.....)))....)))))..))))).............(((.(((((.....................))))).)))...........	0.53333
498	617	37	-30.4	0.42	0.58	25.38	CAUACUACAUGUACUUGGAUAGGAGCGAUGCCGGGAAGGCCAUUUCGUUUGCUACCACAUUGGGAGUGAACAAGUGCCACGUACAGAUCAUGGACCUCGGGCACAUGUGUGACGCCACCA	...............(((.(((((((((.(((.....)))....)))))).))))))...(((..(((.(((.(((((.((..((.....)).....)))))))...)))..)))..)))	...............(((.(((((((((.(((.....)))....)))))).))))))....((..(((.....(((((.((..((.....)).....)))))))........)))..)).	0.525
499	618	37	-31	0.25	0.56	21.01	AUACUACAUGUACUUGGAUAGGAGCGAUGCCGGGAAGGCCAUUUCGUUUGCUACCACAUUGGGAGUGAACAAGUGCCACGUACAGAUCAUGGACCUCGGGCACAUGUGUGACGCCACCAU	..............(((.(((((((((.(((.....)))....)))))).))))))...(((..(((.(((.(((((.((..((.....)).....)))))))...)))..)))..))).	..............(((.(((((((((.(((.....)))....)))))).))))))...(((..(((.(((.(((((.((..((.....)).....)))))))...)))..)))..))).	0.51667
500	619	37	-31	0.37	0.6	30.33	UACUACAUGUACUUGGAUAGGAGCGAUGCCGGGAAGGCCAUUUCGUUUGCUACCACAUUGGGAGUGAACAAGUGCCACGUACAGAUCAUGGACCUCGGGCACAUGUGUGACGCCACCAUG	.............(((.(((((((((.(((.....)))....)))))).))))))...(((..(((.(((.(((((.((..((.....)).....)))))))...)))..)))..)))..	.............(((.(((((((((.(((.....)))....)))))).))))))....((..(((.....(((((.((..((.....)).....)))))))........)))..))...	0.525
501	620	37	-32.3	-0.08	0.47	38.77	ACUACAUGUACUUGGAUAGGAGCGAUGCCGGGAAGGCCAUUUCGUUUGCUACCACAUUGGGAGUGAACAAGUGCCACGUACAGAUCAUGGACCUCGGGCACAUGUGUGACGCCACCAUGA	......(((((.(((...........(((.....)))(((((.(((((((.(((...))).))))))))))))))).)))))..((((((.(.(((.((....)).))).)...))))))	......(((((.(((...........(((.....)))......((((((..((.....))..)))))).....))).)))))...(((((........................))))).	0.525
502	621	37	-32.8	0.06	0.52	32.04	CUACAUGUACUUGGAUAGGAGCGAUGCCGGGAAGGCCAUUUCGUUUGCUACCACAUUGGGAGUGAACAAGUGCCACGUACAGAUCAUGGACCUCGGGCACAUGUGUGACGCCACCAUGAG	.....(((((.(((...........(((.....)))(((((.(((((((.(((...))).))))))))))))))).)))))..((((((.(.(((.((....)).))).)...)))))).	.....(((((.(((...........(((.....)))(((((.(((((((.((.....)).))))))))))))))).)))))..((((((...(((.((....)).))).....)))))).	0.53333
503	622	37	-32.8	-0.03	0.43	31.49	UACAUGUACUUGGAUAGGAGCGAUGCCGGGAAGGCCAUUUCGUUUGCUACCACAUUGGGAGUGAACAAGUGCCACGUACAGAUCAUGGACCUCGGGCACAUGUGUGACGCCACCAUGAGU	....(((((.(((...........(((.....)))(((((.(((((((.(((...))).))))))))))))))).)))))..((((((.(.(((.((....)).))).)...))))))..	....(((((.(((...........(((.....)))(((((.(((((((.((.....)).))))))))))))))).)))))..((((((...(((.((....)).))).....))))))..	0.525
504	623	37	-32.8	0.06	0.51	30.98	ACAUGUACUUGGAUAGGAGCGAUGCCGGGAAGGCCAUUUCGUUUGCUACCACAUUGGGAGUGAACAAGUGCCACGUACAGAUCAUGGACCUCGGGCACAUGUGUGACGCCACCAUGAGUU	...(((((.(((...........(((.....)))(((((.(((((((.(((...))).))))))))))))))).)))))..((((((.(.(((.((....)).))).)...))))))...	...(((((.(((...........(((.....)))(((((.(((((((.((.....)).))))))))))))))).)))))..((((((...(((.((....)).))).....))))))...	0.525
505	624	37	-32.8	0.2	0.55	30.15	CAUGUACUUGGAUAGGAGCGAUGCCGGGAAGGCCAUUUCGUUUGCUACCACAUUGGGAGUGAACAAGUGCCACGUACAGAUCAUGGACCUCGGGCACAUGUGUGACGCCACCAUGAGUUA	..(((((.(((...........(((.....)))(((((.(((((((.(((...))).))))))))))))))).)))))..((((((.(.(((.((....)).))).)...))))))....	..(((((.(((...........(((.....)))(((((.(((((((.((.....)).))))))))))))))).)))))..((((((...(((.((....)).))).....))))))....	0.525
506	625	37	-32.8	-0.1	0.46	30.01	AUGUACUUGGAUAGGAGCGAUGCCGGGAAGGCCAUUUCGUUUGCUACCACAUUGGGAGUGAACAAGUGCCACGUACAGAUCAUGGACCUCGGGCACAUGUGUGACGCCACCAUGAGUUAU	.(((((.(((...........(((.....)))(((((.(((((((.(((...))).))))))))))))))).)))))..((((((.(.(((.((....)).))).)...)))))).....	.(((((.(((...........(((.....)))(((((.(((((((.((.....)).))))))))))))))).)))))..((((((...(((.((....)).))).....)))))).....	0.51667
507	626	37	-32.8	0.29	0.55	30.59	UGUACUUGGAUAGGAGCGAUGCCGGGAAGGCCAUUUCGUUUGCUACCACAUUGGGAGUGAACAAGUGCCACGUACAGAUCAUGGACCUCGGGCACAUGUGUGACGCCACCAUGAGUUAUG	(((((.(((...........(((.....)))(((((.(((((((.(((...))).))))))))))))))).)))))..((((((.(.(((.((....)).))).)...))))))......	(((((.(((...........(((.....)))(((((.(((((((.((.....)).))))))))))))))).)))))..((((((...(((.((....)).))).....))))))......	0.525
508	627	37	-32.1	0.15	0.53	41.91	GUACUUGGAUAGGAGCGAUGCCGGGAAGGCCAUUUCGUUUGCUACCACAUUGGGAGUGAACAAGUGCCACGUACAGAUCAUGGACCUCGGGCACAUGUGUGACGCCACCAUGAGUUAUGA	((((.(((...........(((.....)))(((((.(((((((.(((...))).))))))))))))))).))))...((((((.(.(((.((....)).))).)...)))))).......	((((..((...........(((.....)))......((((((..((.....))..)))))).....))..))))...((((((........................)))))).......	0.525
509	628	37	-31.2	0.72	0.76	36.31	UACUUGGAUAGGAGCGAUGCCGGGAAGGCCAUUUCGUUUGCUACCACAUUGGGAGUGAACAAGUGCCACGUACAGAUCAUGGACCUCGGGCACAUGUGUGACGCCACCAUGAGUUAUGAG	....(((.(((((((((.(((.....)))....)))))).))))))(((.((..(((.(((.(((((.((..((.....)).....)))))))...)))..)))..))))).........	....(((.(((((((((.(((.....)))....)))))).))))))....((..(((.....(((((.((..((.....)).....)))))))........)))..))............	0.525
510	629	37	-31.2	0.59	0.72	39.74	ACUUGGAUAGGAGCGAUGCCGGGAAGGCCAUUUCGUUUGCUACCACAUUGGGAGUGAACAAGUGCCACGUACAGAUCAUGGACCUCGGGCACAUGUGUGACGCCACCAUGAGUUAUGAGU	...(((.(((((((((.(((.....)))....)))))).))))))(((.((..(((.(((.(((((.((..((.....)).....)))))))...)))..)))..)))))..........	...(((.(((((((((.(((.....)))....)))))).))))))....((..((......(((((.((..(.......).....))))))).........))..)).............	0.525
511	630	37	-31.2	0.99	0.84	44.05	CUUGGAUAGGAGCGAUGCCGGGAAGGCCAUUUCGUUUGCUACCACAUUGGGAGUGAACAAGUGCCACGUACAGAUCAUGGACCUCGGGCACAUGUGUGACGCCACCAUGAGUUAUGAGUG	..(((.(((((((((.(((.....)))....)))))).))))))(((.((..(((.(((.(((((.((..((.....)).....)))))))...)))..)))..)))))...........	...((.(((.(((((.(((.....)))....)))))..))))).................(((((.....................))))).............................	0.53333
512	631	37	-31.2	0.95	0.84	28.09	UUGGAUAGGAGCGAUGCCGGGAAGGCCAUUUCGUUUGCUACCACAUUGGGAGUGAACAAGUGCCACGUACAGAUCAUGGACCUCGGGCACAUGUGUGACGCCACCAUGAGUUAUGAGUGC	.(((.(((((((((.(((.....)))....)))))).))))))(((.((..(((.(((.(((((.((..((.....)).....)))))))...)))..)))..)))))............	.(((.(((((((((.(((.....)))....)))))).))))))((..((..(((.....(((((.((..((.....)).....)))))))........)))..)).))............	0.53333
513	632	37	-31	0.96	0.79	40.33	UGGAUAGGAGCGAUGCCGGGAAGGCCAUUUCGUUUGCUACCACAUUGGGAGUGAACAAGUGCCACGUACAGAUCAUGGACCUCGGGCACAUGUGUGACGCCACCAUGAGUUAUGAGUGCC	(((.(((((((((.(((.....)))....)))))).))))))(((.((..(((.(((.(((((.((..((.....)).....)))))))...)))..)))..))))).............	(((.(((((((((.(((.....)))....)))))).))))))................(((((.((................)))))))...............................	0.54167
514	633	37	-31.8	1.02	0.83	46.01	GGAUAGGAGCGAUGCCGGGAAGGCCAUUUCGUUUGCUACCACAUUGGGAGUGAACAAGUGCCACGUACAGAUCAUGGACCUCGGGCACAUGUGUGACGCCACCAUGAGUUAUGAGUGCCC	((.(((((((((.(((.....)))....)))))).))))).....((..((((....((((...))))...))))...))..((((((...((((((..........)))))).))))))	.............(((.....)))......((((((..((.....))..))))))...........................((((((....(((((..........)))))..))))))	0.55
515	634	37	-32.2	0.62	0.69	39.81	GAUAGGAGCGAUGCCGGGAAGGCCAUUUCGUUUGCUACCACAUUGGGAGUGAACAAGUGCCACGUACAGAUCAUGGACCUCGGGCACAUGUGUGACGCCACCAUGAGUUAUGAGUGCCCU	...(((.(((.((((.(..(((((((.(((((((((.(((...))).)))))))..((((...)))).))..)))).)))).))))((((.(((....))))))).........))))))	........................((((.(((((((.(((...))).))))))))))).......................((((((..........................)))))).	0.54167
516	635	37	-33.6	-0.11	0.43	35.21	AUAGGAGCGAUGCCGGGAAGGCCAUUUCGUUUGCUACCACAUUGGGAGUGAACAAGUGCCACGUACAGAUCAUGGACCUCGGGCACAUGUGUGACGCCACCAUGAGUUAUGAGUGCCCUA	.((((.(((.((((.(..(((((((.(((((((((.(((...))).)))))))..((((...)))).))..)))).)))).))))((((.(((....))))))).........)))))))	.((((.((....................(((((((.(((...))).)))))))................................((((.(((....)))))))..........))))))	0.53333
517	636	37	-33.9	-0.08	0.45	34.01	UAGGAGCGAUGCCGGGAAGGCCAUUUCGUUUGCUACCACAUUGGGAGUGAACAAGUGCCACGUACAGAUCAUGGACCUCGGGCACAUGUGUGACGCCACCAUGAGUUAUGAGUGCCCUAU	((((.(((.((((.(..(((((((.(((((((((.(((...))).)))))))..((((...)))).))..)))).)))).))))((((.(((....))))))).........))))))).	((((.((....................(((((((.(((...))).)))))))................................((((.(((....)))))))..........)))))).	0.53333
518	637	37	-32.7	0.61	0.67	39.83	AGGAGCGAUGCCGGGAAGGCCAUUUCGUUUGCUACCACAUUGGGAGUGAACAAGUGCCACGUACAGAUCAUGGACCUCGGGCACAUGUGUGACGCCACCAUGAGUUAUGAGUGCCCUAUG	(((.(((.((((.(..(((((((.(((((((((.(((...))).)))))))..((((...)))).))..)))).)))).))))((((.(((....))))))).........))))))...	(((.((...............((((.(((((((.(((...))).)))))))))))............................((((.(((....)))))))..........)))))...	0.54167
519	638	37	-31.6	0.98	0.82	39.26	GGAGCGAUGCCGGGAAGGCCAUUUCGUUUGCUACCACAUUGGGAGUGAACAAGUGCCACGUACAGAUCAUGGACCUCGGGCACAUGUGUGACGCCACCAUGAGUUAUGAGUGCCCUAUGC	((.(((.((((.(..(((((((.(((((((((.(((...))).)))))))..((((...)))).))..)))).)))).))))((((.(((....))))))).........))))).....	....................((((.(((((((.(((...))).))))))))))).......................((((((....(((((..........)))))..)))))).....	0.55
520	639	37	-32.4	0.55	0.71	34.92	GAGCGAUGCCGGGAAGGCCAUUUCGUUUGCUACCACAUUGGGAGUGAACAAGUGCCACGUACAGAUCAUGGACCUCGGGCACAUGUGUGACGCCACCAUGAGUUAUGAGUGCCCUAUGCU	.(((...(((.....)))(((((.(((((((.(((...))).))))))))))))(((.(.......).))).....((((((...((((((..........)))))).))))))...)))	.(((....((.....)).(((((.(((((((.(((...))).))))))))))))......................((((((....(((((..........)))))..))))))...)))	0.54167
521	640	37	-32.7	0.72	0.74	35.65	AGCGAUGCCGGGAAGGCCAUUUCGUUUGCUACCACAUUGGGAGUGAACAAGUGCCACGUACAGAUCAUGGACCUCGGGCACAUGUGUGACGCCACCAUGAGUUAUGAGUGCCCUAUGCUG	(((...(((.....)))(((((.(((((((.(((...))).))))))))))))(((.(.......).))).....((((((...((((((..........)))))).))))))...))).	(((...(((.....)))(((((.(((((((.(((...))).))))))))))))......................((((((....(((((..........)))))..))))))...))).	0.54167
522	641	37	-32.4	0.97	0.8	40.23	GCGAUGCCGGGAAGGCCAUUUCGUUUGCUACCACAUUGGGAGUGAACAAGUGCCACGUACAGAUCAUGGACCUCGGGCACAUGUGUGACGCCACCAUGAGUUAUGAGUGCCCUAUGCUGG	......((((.((((((((.(((((((((.(((...))).)))))))..((((...)))).))..)))).))).((((((...((((((..........)))))).))))))..).))))	.................((((.(((((((.(((...))).))))))))))).......................((((((..........................))))))........	0.55
523	642	37	-33.5	0.35	0.57	33.66	CGAUGCCGGGAAGGCCAUUUCGUUUGCUACCACAUUGGGAGUGAACAAGUGCCACGUACAGAUCAUGGACCUCGGGCACAUGUGUGACGCCACCAUGAGUUAUGAGUGCCCUAUGCUGGA	.....((((.((((((((.(((((((((.(((...))).)))))))..((((...)))).))..)))).))).((((((...((((((..........)))))).))))))..).)))).	.....((((............(((((((.(((...))).)))))))...........................((((((....(((((..........)))))..))))))....)))).	0.54167
524	643	37	-33.5	0.12	0.49	33.1	GAUGCCGGGAAGGCCAUUUCGUUUGCUACCACAUUGGGAGUGAACAAGUGCCACGUACAGAUCAUGGACCUCGGGCACAUGUGUGACGCCACCAUGAGUUAUGAGUGCCCUAUGCUGGAU	....((((.((((((((.(((((((((.(((...))).)))))))..((((...)))).))..)))).))).((((((...((((((..........)))))).))))))..).))))..	....((((............(((((((.(((...))).)))))))...........................((((((....(((((..........)))))..))))))....))))..	0.53333
525	644	37	-33.5	0.29	0.56	36.17	AUGCCGGGAAGGCCAUUUCGUUUGCUACCACAUUGGGAGUGAACAAGUGCCACGUACAGAUCAUGGACCUCGGGCACAUGUGUGACGCCACCAUGAGUUAUGAGUGCCCUAUGCUGGAUG	...((((.((((((((.(((((((((.(((...))).)))))))..((((...)))).))..)))).))).((((((...((((((..........)))))).))))))..).))))...	...((((............(((((((.(((...))).)))))))...........................((((((....(((((..........)))))..))))))....))))...	0.53333
526	645	37	-33.5	0.15	0.52	38.49	UGCCGGGAAGGCCAUUUCGUUUGCUACCACAUUGGGAGUGAACAAGUGCCACGUACAGAUCAUGGACCUCGGGCACAUGUGUGACGCCACCAUGAGUUAUGAGUGCCCUAUGCUGGAUGA	..((((.((((((((.(((((((((.(((...))).)))))))..((((...)))).))..)))).))).((((((...((((((..........)))))).))))))..).))))....	..((((.......((((.(((((((.(((...))).))))))))))).......................((((((......(((..........)))....))))))....))))....	0.53333
527	646	37	-33.5	0.48	0.58	38.55	GCCGGGAAGGCCAUUUCGUUUGCUACCACAUUGGGAGUGAACAAGUGCCACGUACAGAUCAUGGACCUCGGGCACAUGUGUGACGCCACCAUGAGUUAUGAGUGCCCUAUGCUGGAUGAG	.((((.((((((((.(((((((((.(((...))).)))))))..((((...)))).))..)))).))).((((((...((((((..........)))))).))))))..).)))).....	.((((.......((((.(((((((.(((...))).))))))))))).......................((((((.......(............).....))))))....)))).....	0.54167
528	647	37	-33.3	0.52	0.64	36.82	CCGGGAAGGCCAUUUCGUUUGCUACCACAUUGGGAGUGAACAAGUGCCACGUACAGAUCAUGGACCUCGGGCACAUGUGUGACGCCACCAUGAGUUAUGAGUGCCCUAUGCUGGAUGAGG	((((.((((((((.(((((((((.(((...))).)))))))..((((...)))).))..)))).))).((((((...((((((..........)))))).))))))..).))))......	((((...((..((((.(((((((.(((...))).))))))))))).))....................((((((....(((((..........)))))..))))))....))))......	0.54167
529	648	37	-32.6	0.54	0.64	24.84	CGGGAAGGCCAUUUCGUUUGCUACCACAUUGGGAGUGAACAAGUGCCACGUACAGAUCAUGGACCUCGGGCACAUGUGUGACGCCACCAUGAGUUAUGAGUGCCCUAUGCUGGAUGAGGG	......(((.((((.(((((((.(((...))).)))))))))))))).(((.(((.....((..((((.((.((((.(((....))))))).))..))))..)).....))).)))....	......((..((((.(((((((.(((...))).))))))))))).)).((..(((.........((((.((.((((.(((....))))))).))..)))).........)))..))....	0.54167
530	649	37	-32.6	0.5	0.67	27.42	GGGAAGGCCAUUUCGUUUGCUACCACAUUGGGAGUGAACAAGUGCCACGUACAGAUCAUGGACCUCGGGCACAUGUGUGACGCCACCAUGAGUUAUGAGUGCCCUAUGCUGGAUGAGGGA	.....(((.((((.(((((((.(((...))).)))))))))))))).(((.(((.....((..((((.((.((((.(((....))))))).))..))))..)).....))).))).....	.....((..((((.(((((((.(((...))).))))))))))).)).((..(((.........((((.((.((((.(((....))))))).))..)))).........)))..)).....	0.53333
531	650	37	-32.6	0.38	0.61	27.17	GGAAGGCCAUUUCGUUUGCUACCACAUUGGGAGUGAACAAGUGCCACGUACAGAUCAUGGACCUCGGGCACAUGUGUGACGCCACCAUGAGUUAUGAGUGCCCUAUGCUGGAUGAGGGAG	....(((.((((.(((((((.(((...))).)))))))))))))).(((.(((.....((..((((.((.((((.(((....))))))).))..))))..)).....))).)))......	....((.(((((.(((((((.(((...))).)))))))))))))).((..(((.........((((.((.((((.(((....))))))).))..)))).........)))..))......	0.53333
532	651	37	-32.6	0.21	0.58	29.04	GAAGGCCAUUUCGUUUGCUACCACAUUGGGAGUGAACAAGUGCCACGUACAGAUCAUGGACCUCGGGCACAUGUGUGACGCCACCAUGAGUUAUGAGUGCCCUAUGCUGGAUGAGGGAGU	...(((.((((.(((((((.(((...))).)))))))))))))).(((.(((.....((..((((.((.((((.(((....))))))).))..))))..)).....))).))).......	...((.(((((.(((((((.(((...))).)))))))))))))).((..(((.........(((..((.((((.(((....))))))).))...))).........)))..)).......	0.525
533	652	37	-32.9	0.2	0.56	31.82	AAGGCCAUUUCGUUUGCUACCACAUUGGGAGUGAACAAGUGCCACGUACAGAUCAUGGACCUCGGGCACAUGUGUGACGCCACCAUGAGUUAUGAGUGCCCUAUGCUGGAUGAGGGAGUG	..(((.((((.(((((((.(((...))).))))))))))))))..........(((...((((((((((...((((((..........)))))).))))))..........))))..)))	..((.(((((.(((((((.(((...))).)))))))))))))).....(((..........((.....((((.(((....)))))))......))..........)))............	0.525
534	653	37	-34.3	0.09	0.48	26.67	AGGCCAUUUCGUUUGCUACCACAUUGGGAGUGAACAAGUGCCACGUACAGAUCAUGGACCUCGGGCACAUGUGUGACGCCACCAUGAGUUAUGAGUGCCCUAUGCUGGAUGAGGGAGUGG	.(((.((((.(((((((.(((...))).))))))))))))))..........(((...((((((((((...((((((..........)))))).))))))..........))))..))).	.((.(((((.(((((((.(((...))).))))))))))))))..........(((...((((((((((....(((((..........)))))..))))))..........))))..))).	0.53333
535	654	37	-34.5	0.19	0.54	33.66	GGCCAUUUCGUUUGCUACCACAUUGGGAGUGAACAAGUGCCACGUACAGAUCAUGGACCUCGGGCACAUGUGUGACGCCACCAUGAGUUAUGAGUGCCCUAUGCUGGAUGAGGGAGUGGA	(((.((((.(((((((.(((...))).))))))))))))))..........(((...((((((((((...((((((..........)))))).))))))..........))))..)))..	...(((((.(((((((.(((...))).))))))))))))......................((((((....(((((..........)))))..)))))).....................	0.53333
536	655	37	-33.7	0.05	0.5	35.64	GCCAUUUCGUUUGCUACCACAUUGGGAGUGAACAAGUGCCACGUACAGAUCAUGGACCUCGGGCACAUGUGUGACGCCACCAUGAGUUAUGAGUGCCCUAUGCUGGAUGAGGGAGUGGAA	..(((((.(((((((.(((...))).))))))))))))((((...(..(((..((.....((((((...((((((..........)))))).))))))....)).)))..)...))))..	..(((((.(((((((.(((...))).))))))))))))((((......(((.........((((((....(((((..........)))))..)))))).......)))......))))..	0.525
537	656	37	-33.7	0.07	0.47	33.11	CCAUUUCGUUUGCUACCACAUUGGGAGUGAACAAGUGCCACGUACAGAUCAUGGACCUCGGGCACAUGUGUGACGCCACCAUGAGUUAUGAGUGCCCUAUGCUGGAUGAGGGAGUGGAAC	.(((((.(((((((.(((...))).))))))))))))((((...(..(((..((.....((((((...((((((..........)))))).))))))....)).)))..)...))))...	.(((((.(((((((.(((...))).))))))))))))((((......(((.........((((((....(((((..........)))))..)))))).......)))......))))...	0.525
538	657	37	-33.4	0.11	0.48	16.19	CAUUUCGUUUGCUACCACAUUGGGAGUGAACAAGUGCCACGUACAGAUCAUGGACCUCGGGCACAUGUGUGACGCCACCAUGAGUUAUGAGUGCCCUAUGCUGGAUGAGGGAGUGGAACC	(((((.(((((((.(((...))).))))))))))))((((...(..(((..((.....((((((...((((((..........)))))).))))))....)).)))..)...))))....	(((((.(((((((.(((...))).))))))))))))((((...(..(((..((.....((((((....(((((..........)))))..))))))....)).)))..)...))))....	0.525
539	658	37	-31.9	0.17	0.51	17.78	AUUUCGUUUGCUACCACAUUGGGAGUGAACAAGUGCCACGUACAGAUCAUGGACCUCGGGCACAUGUGUGACGCCACCAUGAGUUAUGAGUGCCCUAUGCUGGAUGAGGGAGUGGAACCA	.....(((((((.(((...))).)))))))..((.((((...(..(((..((.....((((((...((((((..........)))))).))))))....)).)))..)...)))).))..	.....(((((((.(((...))).)))))))..((.((((...(..(((..((.....((((((....(((((..........)))))..))))))....)).)))..)...)))).))..	0.51667
540	659	37	-31.9	0.54	0.68	17.08	UUUCGUUUGCUACCACAUUGGGAGUGAACAAGUGCCACGUACAGAUCAUGGACCUCGGGCACAUGUGUGACGCCACCAUGAGUUAUGAGUGCCCUAUGCUGGAUGAGGGAGUGGAACCAG	....(((((((.(((...))).)))))))..((.((((...(..(((..((.....((((((...((((((..........)))))).))))))....)).)))..)...)))).))...	....(((((((.(((...))).)))))))..((.((((...(..(((..((.....((((((....(((((..........)))))..))))))....)).)))..)...)))).))...	0.525
541	660	37	-31.9	0.2	0.55	16.67	UUCGUUUGCUACCACAUUGGGAGUGAACAAGUGCCACGUACAGAUCAUGGACCUCGGGCACAUGUGUGACGCCACCAUGAGUUAUGAGUGCCCUAUGCUGGAUGAGGGAGUGGAACCAGA	...(((((((.(((...))).)))))))..((.((((...(..(((..((.....((((((...((((((..........)))))).))))))....)).)))..)...)))).))....	...(((((((.(((...))).)))))))..((.((((...(..(((..((.....((((((....(((((..........)))))..))))))....)).)))..)...)))).))....	0.525
542	661	37	-31.9	0.49	0.63	16.41	UCGUUUGCUACCACAUUGGGAGUGAACAAGUGCCACGUACAGAUCAUGGACCUCGGGCACAUGUGUGACGCCACCAUGAGUUAUGAGUGCCCUAUGCUGGAUGAGGGAGUGGAACCAGAU	..(((((((.(((...))).)))))))..((.((((...(..(((..((.....((((((...((((((..........)))))).))))))....)).)))..)...)))).)).....	..(((((((.(((...))).)))))))..((.((((...(..(((..((.....((((((....(((((..........)))))..))))))....)).)))..)...)))).)).....	0.525
543	662	37	-31.9	0.62	0.68	17.46	CGUUUGCUACCACAUUGGGAGUGAACAAGUGCCACGUACAGAUCAUGGACCUCGGGCACAUGUGUGACGCCACCAUGAGUUAUGAGUGCCCUAUGCUGGAUGAGGGAGUGGAACCAGAUG	.(((((((.(((...))).)))))))..((.((((...(..(((..((.....((((((...((((((..........)))))).))))))....)).)))..)...)))).))......	.(((((((.(((...))).)))))))..((.((((...(..(((..((.....((((((....(((((..........)))))..))))))....)).)))..)...)))).))......	0.53333
544	663	37	-32.1	0.38	0.62	16.4	GUUUGCUACCACAUUGGGAGUGAACAAGUGCCACGUACAGAUCAUGGACCUCGGGCACAUGUGUGACGCCACCAUGAGUUAUGAGUGCCCUAUGCUGGAUGAGGGAGUGGAACCAGAUGA	(((((((.(((...))).)))))))..((.((((...(..(((..((.....((((((...((((((..........)))))).))))))....)).)))..)...)))).)).......	(((((((.(((...))).)))))))..((.((((...(..(((..((.....((((((....(((((..........)))))..))))))....)).)))..)...)))).)).......	0.525
545	664	37	-28.2	1.18	0.91	24.38	UUUGCUACCACAUUGGGAGUGAACAAGUGCCACGUACAGAUCAUGGACCUCGGGCACAUGUGUGACGCCACCAUGAGUUAUGAGUGCCCUAUGCUGGAUGAGGGAGUGGAACCAGAUGAU	((((((.(((...))).))))))...((.((((...(..(((..((.....((((((...((((((..........)))))).))))))....)).)))..)...)))).))........	((((((.(((...))).))))))...((.((((...(..(((..((.....((((((....(((((..........)))))..))))))....)).)))..)...)))).))........	0.51667
546	665	37	-27.6	1.45	0.92	24.65	UUGCUACCACAUUGGGAGUGAACAAGUGCCACGUACAGAUCAUGGACCUCGGGCACAUGUGUGACGCCACCAUGAGUUAUGAGUGCCCUAUGCUGGAUGAGGGAGUGGAACCAGAUGAUG	(((((.(((...))).)))))....((.((((...(..(((..((.....((((((...((((((..........)))))).))))))....)).)))..)...)))).)).........	(((((.(((...))).)))))....((.((((...(..(((..((.....((((((....(((((..........)))))..))))))....)).)))..)...)))).)).........	0.525
547	666	37	-26.6	1.67	0.95	32.09	UGCUACCACAUUGGGAGUGAACAAGUGCCACGUACAGAUCAUGGACCUCGGGCACAUGUGUGACGCCACCAUGAGUUAUGAGUGCCCUAUGCUGGAUGAGGGAGUGGAACCAGAUGAUGU	.(((.(((...))).)))......((.((((...(..(((..((.....((((((...((((((..........)))))).))))))....)).)))..)...)))).))..........	.((..((.....))..))......(..((((...(..(((.........((((((....(((((..........)))))..)))))).......)))..)...))))..)..........	0.525
548	667	37	-26.5	1.81	0.99	36.47	GCUACCACAUUGGGAGUGAACAAGUGCCACGUACAGAUCAUGGACCUCGGGCACAUGUGUGACGCCACCAUGAGUUAUGAGUGCCCUAUGCUGGAUGAGGGAGUGGAACCAGAUGAUGUC	(((.(((...))).)))......((.((((...(..(((..((.....((((((...((((((..........)))))).))))))....)).)))..)...)))).))...........	((..((.....))..)).........((((...(..(((.........((((((....(((((..........)))))..)))))).......)))..)...))))..............	0.53333
549	668	37	-26	2.02	0.98	48.84	CUACCACAUUGGGAGUGAACAAGUGCCACGUACAGAUCAUGGACCUCGGGCACAUGUGUGACGCCACCAUGAGUUAUGAGUGCCCUAUGCUGGAUGAGGGAGUGGAACCAGAUGAUGUCG	....(((.(((........))))))((((...(..(((..((.....((((((...((((((..........)))))).))))))....)).)))..)...))))...............	........................................................................................................................	0.53333
550	669	37	-26	1.86	0.98	49.09	UACCACAUUGGGAGUGAACAAGUGCCACGUACAGAUCAUGGACCUCGGGCACAUGUGUGACGCCACCAUGAGUUAUGAGUGCCCUAUGCUGGAUGAGGGAGUGGAACCAGAUGAUGUCGA	...(((.(((........))))))((((...(..(((..((.....((((((...((((((..........)))))).))))))....)).)))..)...))))................	........................................................................................................................	0.525
551	670	37	-26	1.85	0.96	48.63	ACCACAUUGGGAGUGAACAAGUGCCACGUACAGAUCAUGGACCUCGGGCACAUGUGUGACGCCACCAUGAGUUAUGAGUGCCCUAUGCUGGAUGAGGGAGUGGAACCAGAUGAUGUCGAU	..(((.(((........))))))((((...(..(((..((.....((((((...((((((..........)))))).))))))....)).)))..)...)))).................	........................................................................................................................	0.525
552	671	37	-26	1.81	0.96	48.68	CCACAUUGGGAGUGAACAAGUGCCACGUACAGAUCAUGGACCUCGGGCACAUGUGUGACGCCACCAUGAGUUAUGAGUGCCCUAUGCUGGAUGAGGGAGUGGAACCAGAUGAUGUCGAUU	.(((.(((........))))))((((...(..(((..((.....((((((...((((((..........)))))).))))))....)).)))..)...))))..................	............................................(((((............................)))))......................................	0.525
553	672	37	-25.7	1.8	0.97	42.78	CACAUUGGGAGUGAACAAGUGCCACGUACAGAUCAUGGACCUCGGGCACAUGUGUGACGCCACCAUGAGUUAUGAGUGCCCUAUGCUGGAUGAGGGAGUGGAACCAGAUGAUGUCGAUUG	(((.(((........))))))((((...(..(((..((.....((((((...((((((..........)))))).))))))....)).)))..)...))))...................	.....................((((......(((.........((((((....(((((..........)))))..)))))).......)))......))))...................	0.525
554	673	37	-25.3	1.87	0.96	36.65	ACAUUGGGAGUGAACAAGUGCCACGUACAGAUCAUGGACCUCGGGCACAUGUGUGACGCCACCAUGAGUUAUGAGUGCCCUAUGCUGGAUGAGGGAGUGGAACCAGAUGAUGUCGAUUGC	..(((((.(........((.((((...(..(((..((.....((((((...((((((..........)))))).))))))....)).)))..)...)))).)).......).)))))...	.................(..((((...(..(((.........((((((....(((((..........)))))..)))))).......)))..)...))))..).................	0.525
555	674	37	-25.3	2.15	0.98	38.7	CAUUGGGAGUGAACAAGUGCCACGUACAGAUCAUGGACCUCGGGCACAUGUGUGACGCCACCAUGAGUUAUGAGUGCCCUAUGCUGGAUGAGGGAGUGGAACCAGAUGAUGUCGAUUGCU	.(((((.(........((.((((...(..(((..((.....((((((...((((((..........)))))).))))))....)).)))..)...)))).)).......).)))))....	...................((((...(..(((.........((((((....(((((..........)))))..)))))).......)))..)...)))).....................	0.525
556	675	37	-25.7	2.24	0.98	36.98	AUUGGGAGUGAACAAGUGCCACGUACAGAUCAUGGACCUCGGGCACAUGUGUGACGCCACCAUGAGUUAUGAGUGCCCUAUGCUGGAUGAGGGAGUGGAACCAGAUGAUGUCGAUUGCUG	...((.(((..(((.((.((((...(..(((..((.....((((((...((((((..........)))))).))))))....)).)))..)...)))).)).......)))..))).)).	..................((((...(..(((.........((((((....(((((..........)))))..)))))).......)))..)...))))......................	0.525
557	676	37	-27.8	1.79	0.95	33.54	UUGGGAGUGAACAAGUGCCACGUACAGAUCAUGGACCUCGGGCACAUGUGUGACGCCACCAUGAGUUAUGAGUGCCCUAUGCUGGAUGAGGGAGUGGAACCAGAUGAUGUCGAUUGCUGG	.(((.(.(.....).).))).........(((...((((((((((...((((((..........)))))).))))))..........))))..)))...((((.((((....))))))))	.................((((......(((.........((((((....(((((..........)))))..)))))).......)))......))))..((((.((((....))))))))	0.53333
558	677	37	-29.1	1.29	0.88	34.59	UGGGAGUGAACAAGUGCCACGUACAGAUCAUGGACCUCGGGCACAUGUGUGACGCCACCAUGAGUUAUGAGUGCCCUAUGCUGGAUGAGGGAGUGGAACCAGAUGAUGUCGAUUGCUGGU	(((.(.(.....).).))).........(((...((((((((((...((((((..........)))))).))))))..........))))..)))..(((((.((((....)))))))))	................((((..................((((((....(((((..........)))))..))))))................)))).(((((.((((....)))))))))	0.53333
559	678	37	-29.7	1.54	0.9	32.98	GGGAGUGAACAAGUGCCACGUACAGAUCAUGGACCUCGGGCACAUGUGUGACGCCACCAUGAGUUAUGAGUGCCCUAUGCUGGAUGAGGGAGUGGAACCAGAUGAUGUCGAUUGCUGGUG	...............((((...(..(((..((.....((((((...((((((..........)))))).))))))....)).)))..)...)))).(((((.((((....))))))))).	...............((((......(((.........((((((....(((((..........)))))..)))))).......)))......)))).(((((.((((....))))))))).	0.54167
560	679	37	-29.7	1.44	0.95	33.7	GGAGUGAACAAGUGCCACGUACAGAUCAUGGACCUCGGGCACAUGUGUGACGCCACCAUGAGUUAUGAGUGCCCUAUGCUGGAUGAGGGAGUGGAACCAGAUGAUGUCGAUUGCUGGUGC	..............((((...(..(((..((.....((((((...((((((..........)))))).))))))....)).)))..)...)))).(((((.((((....)))))))))..	..............((((......(((.........((((((....(((((..........)))))..)))))).......)))......)))).(((((.((((....)))))))))..	0.54167
561	680	37	-29.7	1.07	0.84	34.95	GAGUGAACAAGUGCCACGUACAGAUCAUGGACCUCGGGCACAUGUGUGACGCCACCAUGAGUUAUGAGUGCCCUAUGCUGGAUGAGGGAGUGGAACCAGAUGAUGUCGAUUGCUGGUGCA	.............((((...(..(((..((.....((((((...((((((..........)))))).))))))....)).)))..)...)))).(((((.((((....)))))))))...	.............((((......(((.........((((((....(((((..........)))))..)))))).......)))......)))).(((((.((((....)))))))))...	0.53333
562	681	37	-29.7	1.05	0.84	35.36	AGUGAACAAGUGCCACGUACAGAUCAUGGACCUCGGGCACAUGUGUGACGCCACCAUGAGUUAUGAGUGCCCUAUGCUGGAUGAGGGAGUGGAACCAGAUGAUGUCGAUUGCUGGUGCAA	............((((...(..(((..((.....((((((...((((((..........)))))).))))))....)).)))..)...)))).(((((.((((....)))))))))....	............((((..................((((((....(((((..........)))))..))))))................)))).(((((.((((....)))))))))....	0.525
563	682	37	-29.7	1.08	0.84	36.65	GUGAACAAGUGCCACGUACAGAUCAUGGACCUCGGGCACAUGUGUGACGCCACCAUGAGUUAUGAGUGCCCUAUGCUGGAUGAGGGAGUGGAACCAGAUGAUGUCGAUUGCUGGUGCAAC	...........((((...(..(((..((.....((((((...((((((..........)))))).))))))....)).)))..)...)))).(((((.((((....))))))))).....	............((...................((((((.....((((..........))))...)))))).................))..(((((.((((....))))))))).....	0.53333
564	683	37	-29.7	0.81	0.81	35.68	UGAACAAGUGCCACGUACAGAUCAUGGACCUCGGGCACAUGUGUGACGCCACCAUGAGUUAUGAGUGCCCUAUGCUGGAUGAGGGAGUGGAACCAGAUGAUGUCGAUUGCUGGUGCAACA	..........((((...(..(((..((.....((((((...((((((..........)))))).))))))....)).)))..)...)))).(((((.((((....)))))))))......	.....................................((((.(((....)))))))...................................(((((.((((....)))))))))......	0.525
565	684	37	-29.9	0.81	0.8	35.3	GAACAAGUGCCACGUACAGAUCAUGGACCUCGGGCACAUGUGUGACGCCACCAUGAGUUAUGAGUGCCCUAUGCUGGAUGAGGGAGUGGAACCAGAUGAUGUCGAUUGCUGGUGCAACAC	.......(.((.(((.(((.....((..((((.((.((((.(((....))))))).))..))))..)).....))).))).)).)(((..(((((.((((....)))))))))....)))	............((..(((.........(((..((.((((.(((....))))))).))...))).........)))..))..........(((((.((((....))))))))).......	0.53333
566	685	37	-31.1	0.44	0.65	34.15	AACAAGUGCCACGUACAGAUCAUGGACCUCGGGCACAUGUGUGACGCCACCAUGAGUUAUGAGUGCCCUAUGCUGGAUGAGGGAGUGGAACCAGAUGAUGUCGAUUGCUGGUGCAACACG	......(.((.(((.(((.....((..((((.((.((((.(((....))))))).))..))))..)).....))).))).)).)(((..(((((.((((....)))))))))....))).	........((.((..(((.........(((..((.((((.(((....))))))).))...))).........)))..)).))..(((..(((((.((((....)))))))))....))).	0.53333
567	686	37	-31.1	0.76	0.76	33.94	ACAAGUGCCACGUACAGAUCAUGGACCUCGGGCACAUGUGUGACGCCACCAUGAGUUAUGAGUGCCCUAUGCUGGAUGAGGGAGUGGAACCAGAUGAUGUCGAUUGCUGGUGCAACACGA	.....(.((.(((.(((.....((..((((.((.((((.(((....))))))).))..))))..)).....))).))).)).)(((..(((((.((((....)))))))))....)))..	.......((.((..(((.........(((..((.((((.(((....))))))).))...))).........)))..)).))..(((..(((((.((((....)))))))))....)))..	0.53333
568	687	37	-31.1	0.9	0.85	41.87	CAAGUGCCACGUACAGAUCAUGGACCUCGGGCACAUGUGUGACGCCACCAUGAGUUAUGAGUGCCCUAUGCUGGAUGAGGGAGUGGAACCAGAUGAUGUCGAUUGCUGGUGCAACACGAC	....(.((.(((.(((.....((..((((.((.((((.(((....))))))).))..))))..)).....))).))).)).)(((..(((((.((((....)))))))))....)))...	.................................((((.(((....)))))))...................................(((((.((((....)))))))))..........	0.54167
569	688	37	-32.2	0.47	0.64	22.42	AAGUGCCACGUACAGAUCAUGGACCUCGGGCACAUGUGUGACGCCACCAUGAGUUAUGAGUGCCCUAUGCUGGAUGAGGGAGUGGAACCAGAUGAUGUCGAUUGCUGGUGCAACACGACA	..((.((((...(..(((..((.....((((((...((((((..........)))))).))))))....)).)))..)...)))).)).......(((((.((((....))))..)))))	..((.((((...(..(((..((.....((((((....(((((..........)))))..))))))....)).)))..)...)))).)).......(((((.((((....))))..)))))	0.53333
570	689	37	-33.4	0.18	0.48	15.81	AGUGCCACGUACAGAUCAUGGACCUCGGGCACAUGUGUGACGCCACCAUGAGUUAUGAGUGCCCUAUGCUGGAUGAGGGAGUGGAACCAGAUGAUGUCGAUUGCUGGUGCAACACGACAU	.((.((((...(..(((..((.....((((((...((((((..........)))))).))))))....)).)))..)...)))).))......((((((.((((....))))..))))))	.((.((((...(..(((..((.....((((((....(((((..........)))))..))))))....)).)))..)...)))).))......((((((.((((....))))..))))))	0.53333
571	690	37	-35.7	-0.35	0.35	13.66	GUGCCACGUACAGAUCAUGGACCUCGGGCACAUGUGUGACGCCACCAUGAGUUAUGAGUGCCCUAUGCUGGAUGAGGGAGUGGAACCAGAUGAUGUCGAUUGCUGGUGCAACACGACAUC	((.((((...(..(((..((.....((((((...((((((..........)))))).))))))....)).)))..)...)))).)).....(((((((.((((....))))..)))))))	((.((((...(..(((..((.....((((((....(((((..........)))))..))))))....)).)))..)...)))).)).....(((((((.((((....))))..)))))))	0.54167
572	691	37	-37.1	-0.87	0.21	14.55	UGCCACGUACAGAUCAUGGACCUCGGGCACAUGUGUGACGCCACCAUGAGUUAUGAGUGCCCUAUGCUGGAUGAGGGAGUGGAACCAGAUGAUGUCGAUUGCUGGUGCAACACGACAUCA	..((((...(..(((..((.....((((((...((((((..........)))))).))))))....)).)))..)...)))).......((((((((.((((....))))..))))))))	..((((...(..(((..((.....((((((....(((((..........)))))..))))))....)).)))..)...)))).......((((((((.((((....))))..))))))))	0.53333
573	692	37	-37.6	-1.63	0.05	13.04	GCCACGUACAGAUCAUGGACCUCGGGCACAUGUGUGACGCCACCAUGAGUUAUGAGUGCCCUAUGCUGGAUGAGGGAGUGGAACCAGAUGAUGUCGAUUGCUGGUGCAACACGACAUCAA	.((((...(..(((..((.....((((((...((((((..........)))))).))))))....)).)))..)...)))).......((((((((.((((....))))..)))))))).	.((((...(..(((..((.....((((((....(((((..........)))))..))))))....)).)))..)...)))).......((((((((.((((....))))..)))))))).	0.53333
574	693	37	-37.4	-1.24	0.1	13.42	CCACGUACAGAUCAUGGACCUCGGGCACAUGUGUGACGCCACCAUGAGUUAUGAGUGCCCUAUGCUGGAUGAGGGAGUGGAACCAGAUGAUGUCGAUUGCUGGUGCAACACGACAUCAAC	((((...(..(((..((.....((((((...((((((..........)))))).))))))....)).)))..)...)))).......((((((((.((((....))))..))))))))..	((((...(..(((..((.....((((((....(((((..........)))))..))))))....)).)))..)...)))).......((((((((.((((....))))..))))))))..	0.53333
575	694	37	-35	-0.99	0.17	30.12	CACGUACAGAUCAUGGACCUCGGGCACAUGUGUGACGCCACCAUGAGUUAUGAGUGCCCUAUGCUGGAUGAGGGAGUGGAACCAGAUGAUGUCGAUUGCUGGUGCAACACGACAUCAACU	..(((.(((.....((..((((.((.((((.(((....))))))).))..))))..)).....))).))).((........))((.((((((((.((((....))))..)))))))).))	.....................((((((....(((((..........)))))..))))))........................((.((((((((.((((....))))..)))))))).))	0.525
576	695	37	-35.3	-1	0.16	26.11	ACGUACAGAUCAUGGACCUCGGGCACAUGUGUGACGCCACCAUGAGUUAUGAGUGCCCUAUGCUGGAUGAGGGAGUGGAACCAGAUGAUGUCGAUUGCUGGUGCAACACGACAUCAACUU	.(((.(((.....((..((((.((.((((.(((....))))))).))..))))..)).....))).))).((........))((.((((((((.((((....))))..)))))))).)).	.((..(((.........(((..((.((((.(((....))))))).))...))).........)))..)).((........))((.((((((((.((((....))))..)))))))).)).	0.51667
577	696	37	-35.3	-0.47	0.27	27.09	CGUACAGAUCAUGGACCUCGGGCACAUGUGUGACGCCACCAUGAGUUAUGAGUGCCCUAUGCUGGAUGAGGGAGUGGAACCAGAUGAUGUCGAUUGCUGGUGCAACACGACAUCAACUUG	(((.(((.....((..((((.((.((((.(((....))))))).))..))))..)).....))).))).((........))((.((((((((.((((....))))..)))))))).))..	((..(((.........(((..((.((((.(((....))))))).))...))).........)))..)).((........))((.((((((((.((((....))))..)))))))).))..	0.525
578	697	37	-37.2	-1.02	0.14	11.74	GUACAGAUCAUGGACCUCGGGCACAUGUGUGACGCCACCAUGAGUUAUGAGUGCCCUAUGCUGGAUGAGGGAGUGGAACCAGAUGAUGUCGAUUGCUGGUGCAACACGACAUCAACUUGG	........(((...((((((((((...((((((..........)))))).))))))..........))))..)))...((((.((((((((.((((....))))..)))))))).).)))	........(((...((((((((((....(((((..........)))))..))))))..........))))..)))...((((.((((((((.((((....))))..)))))))).).)))	0.525
579	698	37	-38.3	-1.44	0.09	10.62	UACAGAUCAUGGACCUCGGGCACAUGUGUGACGCCACCAUGAGUUAUGAGUGCCCUAUGCUGGAUGAGGGAGUGGAACCAGAUGAUGUCGAUUGCUGGUGCAACACGACAUCAACUUGGG	.......(((...((((((((((...((((((..........)))))).))))))..........))))..)))...((((.((((((((.((((....))))..)))))))).).))).	.......(((...((((((((((....(((((..........)))))..))))))..........))))..)))...((((.((((((((.((((....))))..)))))))).).))).	0.525
580	699	37	-38.3	-1.29	0.11	11.22	ACAGAUCAUGGACCUCGGGCACAUGUGUGACGCCACCAUGAGUUAUGAGUGCCCUAUGCUGGAUGAGGGAGUGGAACCAGAUGAUGUCGAUUGCUGGUGCAACACGACAUCAACUUGGGU	......(((...((((((((((...((((((..........)))))).))))))..........))))..)))...((((.((((((((.((((....))))..)))))))).).)))..	......(((...((((((((((....(((((..........)))))..))))))..........))))..)))...((((.((((((((.((((....))))..)))))))).).)))..	0.525
581	700	37	-38.3	-1.21	0.09	12.81	CAGAUCAUGGACCUCGGGCACAUGUGUGACGCCACCAUGAGUUAUGAGUGCCCUAUGCUGGAUGAGGGAGUGGAACCAGAUGAUGUCGAUUGCUGGUGCAACACGACAUCAACUUGGGUU	.....(((...((((((((((...((((((..........)))))).))))))..........))))..)))...((((.((((((((.((((....))))..)))))))).).)))...	.....(((...((((((((((....(((((..........)))))..))))))..........))))..)))...((.(.((((((((.((((....))))..)))))))).)..))...	0.525
582	701	37	-38.9	-1.37	0.1	12.21	AGAUCAUGGACCUCGGGCACAUGUGUGACGCCACCAUGAGUUAUGAGUGCCCUAUGCUGGAUGAGGGAGUGGAACCAGAUGAUGUCGAUUGCUGGUGCAACACGACAUCAACUUGGGUUG	....(((...((((((((((...((((((..........)))))).))))))..........))))..))).((((((.((((((((.((((....))))..)))))))).))..)))).	....(((...((((((((((....(((((..........)))))..))))))..........))))..))).((((.(.((((((((.((((....))))..)))))))).)...)))).	0.525
583	702	37	-38.9	-1.18	0.14	12.3	GAUCAUGGACCUCGGGCACAUGUGUGACGCCACCAUGAGUUAUGAGUGCCCUAUGCUGGAUGAGGGAGUGGAACCAGAUGAUGUCGAUUGCUGGUGCAACACGACAUCAACUUGGGUUGU	...(((...((((((((((...((((((..........)))))).))))))..........))))..))).((((((.((((((((.((((....))))..)))))))).))..))))..	...(((...((((((((((....(((((..........)))))..))))))..........))))..))).((((.(.((((((((.((((....))))..)))))))).)...))))..	0.525
584	703	37	-38.9	-1.1	0.12	12.65	AUCAUGGACCUCGGGCACAUGUGUGACGCCACCAUGAGUUAUGAGUGCCCUAUGCUGGAUGAGGGAGUGGAACCAGAUGAUGUCGAUUGCUGGUGCAACACGACAUCAACUUGGGUUGUG	..(((...((((((((((...((((((..........)))))).))))))..........))))..))).((((((.((((((((.((((....))))..)))))))).))..))))...	..(((...((((((((((....(((((..........)))))..))))))..........))))..))).((((.(.((((((((.((((....))))..)))))))).)...))))...	0.525
585	704	37	-39.2	-1.33	0.08	12.48	UCAUGGACCUCGGGCACAUGUGUGACGCCACCAUGAGUUAUGAGUGCCCUAUGCUGGAUGAGGGAGUGGAACCAGAUGAUGUCGAUUGCUGGUGCAACACGACAUCAACUUGGGUUGUGU	((((...((((((((((...((((((..........)))))).))))))..........))))..))))((((((.((((((((.((((....))))..)))))))).))..))))....	((((...((((((((((....(((((..........)))))..))))))..........))))..))))((((.(.((((((((.((((....))))..)))))))).)...))))....	0.525
586	705	37	-38.7	-1.19	0.14	13.74	CAUGGACCUCGGGCACAUGUGUGACGCCACCAUGAGUUAUGAGUGCCCUAUGCUGGAUGAGGGAGUGGAACCAGAUGAUGUCGAUUGCUGGUGCAACACGACAUCAACUUGGGUUGUGUA	(((...((((((((((...((((((..........)))))).))))))..........))))..))).((((((.((((((((.((((....))))..)))))))).))..)))).....	(((...((((((((((....(((((..........)))))..))))))..........))))..))).((((.(.((((((((.((((....))))..)))))))).)...)))).....	0.525
587	706	37	-36.8	-0.63	0.24	20.79	AUGGACCUCGGGCACAUGUGUGACGCCACCAUGAGUUAUGAGUGCCCUAUGCUGGAUGAGGGAGUGGAACCAGAUGAUGUCGAUUGCUGGUGCAACACGACAUCAACUUGGGUUGUGUAC	.....((((((((((...((((((..........)))))).))))))..........))))....(.((((((.((((((((.((((....))))..)))))))).))..)))).)....	.....((((((((((....(((((..........)))))..))))))..........))))......((((.(.((((((((.((((....))))..)))))))).)...))))......	0.525
588	707	37	-36.8	-0.41	0.32	20.21	UGGACCUCGGGCACAUGUGUGACGCCACCAUGAGUUAUGAGUGCCCUAUGCUGGAUGAGGGAGUGGAACCAGAUGAUGUCGAUUGCUGGUGCAACACGACAUCAACUUGGGUUGUGUACG	....((((((((((...((((((..........)))))).))))))..........))))....(.((((((.((((((((.((((....))))..)))))))).))..)))).).....	....((((((((((....(((((..........)))))..))))))..........))))......((((((.((((((((.((((....))))..)))))))).))..)))).......	0.53333
589	708	37	-36.8	-0.46	0.28	20.34	GGACCUCGGGCACAUGUGUGACGCCACCAUGAGUUAUGAGUGCCCUAUGCUGGAUGAGGGAGUGGAACCAGAUGAUGUCGAUUGCUGGUGCAACACGACAUCAACUUGGGUUGUGUACGG	...((((((((((...((((((..........)))))).))))))..........))))....(.((((((.((((((((.((((....))))..)))))))).))..)))).)......	...((((((((((....(((((..........)))))..))))))..........))))......((((((.((((((((.((((....))))..)))))))).))..))))........	0.54167
590	709	37	-36.8	-0.78	0.17	19.16	GACCUCGGGCACAUGUGUGACGCCACCAUGAGUUAUGAGUGCCCUAUGCUGGAUGAGGGAGUGGAACCAGAUGAUGUCGAUUGCUGGUGCAACACGACAUCAACUUGGGUUGUGUACGGA	..((((((((((...((((((..........)))))).))))))..........))))....(.((((((.((((((((.((((....))))..)))))))).))..)))).).......	..((((((((((....(((((..........)))))..))))))..........))))......((((((.((((((((.((((....))))..)))))))).))..)))).........	0.53333
591	710	37	-36.8	-0.67	0.24	18.14	ACCUCGGGCACAUGUGUGACGCCACCAUGAGUUAUGAGUGCCCUAUGCUGGAUGAGGGAGUGGAACCAGAUGAUGUCGAUUGCUGGUGCAACACGACAUCAACUUGGGUUGUGUACGGAA	.((((((((((...((((((..........)))))).))))))..........))))....(.((((((.((((((((.((((....))))..)))))))).))..)))).)........	.((((((((((....(((((..........)))))..))))))..........))))......((((((.((((((((.((((....))))..)))))))).))..))))..........	0.525
592	711	37	-36.5	-0.33	0.32	19.41	CCUCGGGCACAUGUGUGACGCCACCAUGAGUUAUGAGUGCCCUAUGCUGGAUGAGGGAGUGGAACCAGAUGAUGUCGAUUGCUGGUGCAACACGACAUCAACUUGGGUUGUGUACGGAAC	((((((((((...((((((..........)))))).))))))..........))))....(.((((((.((((((((.((((....))))..)))))))).))..)))).).........	((((((((((....(((((..........)))))..))))))..........))))......((((((.((((((((.((((....))))..)))))))).))..))))...........	0.53333
593	712	37	-34.5	0.07	0.52	30.56	CUCGGGCACAUGUGUGACGCCACCAUGAGUUAUGAGUGCCCUAUGCUGGAUGAGGGAGUGGAACCAGAUGAUGUCGAUUGCUGGUGCAACACGACAUCAACUUGGGUUGUGUACGGAACC	((((.((.((((.(((....))))))).))..))))..((((((.....)).))))...(.((((((.((((((((.((((....))))..)))))))).))..)))).)..........	...((((((.....((((..........))))...)))))).....................(((.(.((((((((.((((....))))..)))))))).)...))).............	0.53333
594	713	37	-36.3	-0.66	0.25	19.89	UCGGGCACAUGUGUGACGCCACCAUGAGUUAUGAGUGCCCUAUGCUGGAUGAGGGAGUGGAACCAGAUGAUGUCGAUUGCUGGUGCAACACGACAUCAACUUGGGUUGUGUACGGAACCU	..((((((...((((((..........)))))).))))))...........(((..(((.((((((.((((((((.((((....))))..)))))))).))..))))...)))....)))	..((((((....(((((..........)))))..))))))............((..(........(.((((((((.((((....))))..)))))))).)............)....)).	0.525
595	714	37	-37.1	-0.68	0.22	18.9	CGGGCACAUGUGUGACGCCACCAUGAGUUAUGAGUGCCCUAUGCUGGAUGAGGGAGUGGAACCAGAUGAUGUCGAUUGCUGGUGCAACACGACAUCAACUUGGGUUGUGUACGGAACCUG	.((((((...((((((..........)))))).))))))...........(((..(((.((((((.((((((((.((((....))))..)))))))).))..))))...)))....))).	.((((((....(((((..........)))))..))))))...........(((..((.......(.((((((((.((((....))))..)))))))).)...........))....))).	0.53333
596	715	37	-36.9	-0.94	0.17	19.43	GGGCACAUGUGUGACGCCACCAUGAGUUAUGAGUGCCCUAUGCUGGAUGAGGGAGUGGAACCAGAUGAUGUCGAUUGCUGGUGCAACACGACAUCAACUUGGGUUGUGUACGGAACCUGU	((((((...((((((..........)))))).))))))...........(((..(((.((((((.((((((((.((((....))))..)))))))).))..))))...)))....)))..	((((((....(((((..........)))))..))))))...........(((..((.........((((((((.((((....))))..)))))))).............))....)))..	0.525
597	716	37	-33.5	0.27	0.57	30.61	GGCACAUGUGUGACGCCACCAUGAGUUAUGAGUGCCCUAUGCUGGAUGAGGGAGUGGAACCAGAUGAUGUCGAUUGCUGGUGCAACACGACAUCAACUUGGGUUGUGUACGGAACCUGUC	(((((...((((((..........)))))).)))))........(((.(((..(((.((((((.((((((((.((((....))))..)))))))).))..))))...)))....))))))	(((((....(((((..........)))))..)))))..........................(.((((((((.((((....))))..)))))))).).......................	0.525
598	717	37	-31.6	0.48	0.7	38.5	GCACAUGUGUGACGCCACCAUGAGUUAUGAGUGCCCUAUGCUGGAUGAGGGAGUGGAACCAGAUGAUGUCGAUUGCUGGUGCAACACGACAUCAACUUGGGUUGUGUACGGAACCUGUCA	((((...((((((..........)))))).)))).........(((.(((..(((.((((((.((((((((.((((....))))..)))))))).))..))))...)))....)))))).	.............................................................(.((((((((.((((....))))..)))))))).)........................	0.51667
599	718	37	-32.1	0.04	0.51	34.78	CACAUGUGUGACGCCACCAUGAGUUAUGAGUGCCCUAUGCUGGAUGAGGGAGUGGAACCAGAUGAUGUCGAUUGCUGGUGCAACACGACAUCAACUUGGGUUGUGUACGGAACCUGUCAU	.......(((((..(((((((...)))).)))((((((.....)).)))).........((.((((((((.((((....))))..)))))))).)).(((((........))))))))))	.................(((.....)))....(((............))).........((.((((((((.((((....))))..)))))))).))........................	0.50833
600	719	37	-32.4	0.17	0.54	35.59	ACAUGUGUGACGCCACCAUGAGUUAUGAGUGCCCUAUGCUGGAUGAGGGAGUGGAACCAGAUGAUGUCGAUUGCUGGUGCAACACGACAUCAACUUGGGUUGUGUACGGAACCUGUCAUC	......(((((..(((((((...)))).)))((((((.....)).)))).........((.((((((((.((((....))))..)))))))).)).(((((........)))))))))).	................((.......))...............................((.((((((((.((((....))))..)))))))).)).........................	0.50833
601	720	37	-33.7	-0.52	0.31	31.68	CAUGUGUGACGCCACCAUGAGUUAUGAGUGCCCUAUGCUGGAUGAGGGAGUGGAACCAGAUGAUGUCGAUUGCUGGUGCAACACGACAUCAACUUGGGUUGUGUACGGAACCUGUCAUCA	((((.(((....))))))).....................(((((.((.(((.((((((.((((((((.((((....))))..)))))))).))..)))).).......)))).))))).	((((.(((....))))))).....................(((((........((((((.((((((((.((((....))))..)))))))).))..))))..............))))).	0.50833
602	721	37	-33.7	-0.04	0.5	24.37	AUGUGUGACGCCACCAUGAGUUAUGAGUGCCCUAUGCUGGAUGAGGGAGUGGAACCAGAUGAUGUCGAUUGCUGGUGCAACACGACAUCAACUUGGGUUGUGUACGGAACCUGUCAUCAC	..(((((((..(((((((...)))).)))((((((.....)).)))).........((.((((((((.((((....))))..)))))))).)).(((((........))))))))).)))	..(((((((..(((((((...)))).)))...........................((.((((((((.((((....))))..)))))))).))..((((........)))).)))).)))	0.50833
603	722	37	-35.3	-0.59	0.27	20.96	UGUGUGACGCCACCAUGAGUUAUGAGUGCCCUAUGCUGGAUGAGGGAGUGGAACCAGAUGAUGUCGAUUGCUGGUGCAACACGACAUCAACUUGGGUUGUGUACGGAACCUGUCAUCACA	((((((((..(((((((...)))).)))((((((.....)).)))).........((.((((((((.((((....))))..)))))))).)).(((((........))))))))).))))	((((((((..(((((((...)))).)))(((............))).........((.((((((((.((((....))))..)))))))).))..((((........)))).)))).))))	0.50833
604	723	37	-35.4	-0.87	0.16	21.71	GUGUGACGCCACCAUGAGUUAUGAGUGCCCUAUGCUGGAUGAGGGAGUGGAACCAGAUGAUGUCGAUUGCUGGUGCAACACGACAUCAACUUGGGUUGUGUACGGAACCUGUCAUCACAA	(((((((..(((((((...)))).)))((((((.....)).)))).........((.((((((((.((((....))))..)))))))).)).(((((........))))))))).)))..	(((((((..(((((((...)))).)))(((............))).........((.((((((((.((((....))))..)))))))).))..((((........)))).)))).)))..	0.50833
605	724	37	-32.4	-0.45	0.34	31.57	UGUGACGCCACCAUGAGUUAUGAGUGCCCUAUGCUGGAUGAGGGAGUGGAACCAGAUGAUGUCGAUUGCUGGUGCAACACGACAUCAACUUGGGUUGUGUACGGAACCUGUCAUCACAAA	.(((((..(((((((...)))).)))((((((.....)).)))).........((.((((((((.((((....))))..)))))))).)).(((((........))))))))))......	.(((....(((((((...)))).)))(((............))).........((.((((((((.((((....))))..)))))))).))........................)))...	0.5
606	725	37	-32	-0.28	0.38	32.57	GUGACGCCACCAUGAGUUAUGAGUGCCCUAUGCUGGAUGAGGGAGUGGAACCAGAUGAUGUCGAUUGCUGGUGCAACACGACAUCAACUUGGGUUGUGUACGGAACCUGUCAUCACAAAA	(((((..(((((((...)))).)))((((((.....)).)))).........((.((((((((.((((....))))..)))))))).)).(((((........)))))))))).......	.......(((((((...)))).)))...........................((.((((((((.((((....))))..)))))))).))...............................	0.5
607	726	37	-31.1	-0.34	0.35	33.07	UGACGCCACCAUGAGUUAUGAGUGCCCUAUGCUGGAUGAGGGAGUGGAACCAGAUGAUGUCGAUUGCUGGUGCAACACGACAUCAACUUGGGUUGUGUACGGAACCUGUCAUCACAAAAA	((((..(((((((...)))).)))((((((.....)).)))).........((.((((((((.((((....))))..)))))))).)).(((((........))))))))).........	.......(((((.....))).))..........................((.(.((((((((.((((....))))..)))))))).)..)).............................	0.49167
608	727	37	-31.1	-0.48	0.32	31.35	GACGCCACCAUGAGUUAUGAGUGCCCUAUGCUGGAUGAGGGAGUGGAACCAGAUGAUGUCGAUUGCUGGUGCAACACGACAUCAACUUGGGUUGUGUACGGAACCUGUCAUCACAAAAAA	.....(((((((...)))).)))........(((((((.((.(((.((((((.((((((((.((((....))))..)))))))).))..)))).).......)))).))))).)).....	.....(((((((...)))).))).........................((.(.((((((((.((((....))))..)))))))).)..))..............................	0.49167
609	728	37	-31.1	-0.67	0.19	29.75	ACGCCACCAUGAGUUAUGAGUGCCCUAUGCUGGAUGAGGGAGUGGAACCAGAUGAUGUCGAUUGCUGGUGCAACACGACAUCAACUUGGGUUGUGUACGGAACCUGUCAUCACAAAAAAG	....(((((((...)))).)))........(((((((.((.(((.((((((.((((((((.((((....))))..)))))))).))..)))).).......)))).))))).))......	....(((((((...)))).))).........................((.(.((((((((.((((....))))..)))))))).)..))...............................	0.49167
610	729	37	-32.8	-0.76	0.18	18.33	CGCCACCAUGAGUUAUGAGUGCCCUAUGCUGGAUGAGGGAGUGGAACCAGAUGAUGUCGAUUGCUGGUGCAACACGACAUCAACUUGGGUUGUGUACGGAACCUGUCAUCACAAAAAAGG	...(((((((...)))).))).(((.(..(((((((.((.(((.((((((.((((((((.((((....))))..)))))))).))..)))).).......)))).))))).))..).)))	.(.(((((((...)))).))))(((....(((((((.((.....((((((.((((((((.((((....))))..)))))))).))..))))...........)).))))).))....)))	0.5
611	730	37	-33.5	-0.94	0.12	16.9	GCCACCAUGAGUUAUGAGUGCCCUAUGCUGGAUGAGGGAGUGGAACCAGAUGAUGUCGAUUGCUGGUGCAACACGACAUCAACUUGGGUUGUGUACGGAACCUGUCAUCACAAAAAAGGU	..(((((((...)))).))).(((.(..(((((((.((.(((.((((((.((((((((.((((....))))..)))))))).))..)))).).......)))).))))).))..).))).	(.(((((((...)))).))))(((....(((((((.((.(...((((((.((((((((.((((....))))..)))))))).))..))))..........))).))))).))....))).	0.49167
612	731	37	-33.5	-1.17	0.12	21.28	CCACCAUGAGUUAUGAGUGCCCUAUGCUGGAUGAGGGAGUGGAACCAGAUGAUGUCGAUUGCUGGUGCAACACGACAUCAACUUGGGUUGUGUACGGAACCUGUCAUCACAAAAAAGGUG	.(((((((...)))).))).(((.(..(((((((.((.(((.((((((.((((((((.((((....))))..)))))))).))..)))).).......)))).))))).))..).)))..	.(((((((...)))).))).(((....(((((((.((.....((((((.((((((((.((((....))))..)))))))).))..))))...........)).))))).))....)))..	0.49167
613	732	37	-33.2	-1.11	0.14	27.77	CACCAUGAGUUAUGAGUGCCCUAUGCUGGAUGAGGGAGUGGAACCAGAUGAUGUCGAUUGCUGGUGCAACACGACAUCAACUUGGGUUGUGUACGGAACCUGUCAUCACAAAAAAGGUGA	(((((((...)))).))).(((.(..(((((((.((.(((.((((((.((((((((.((((....))))..)))))))).))..)))).).......)))).))))).))..).)))...	((((((.....))).))).(((....(((((((........((((.(.((((((((.((((....))))..)))))))).)...))))..............))))).))....)))...	0.48333
614	733	37	-30.9	-0.62	0.24	26.02	ACCAUGAGUUAUGAGUGCCCUAUGCUGGAUGAGGGAGUGGAACCAGAUGAUGUCGAUUGCUGGUGCAACACGACAUCAACUUGGGUUGUGUACGGAACCUGUCAUCACAAAAAAGGUGAG	((((((...)))).))..(((.(..(((((((.((.(((.((((((.((((((((.((((....))))..)))))))).))..)))).).......)))).))))).))..).)))....	..(((.....))).....(((....(((((((.((.....((((((.((((((((.((((....))))..)))))))).))..))))...........)).))))).))....)))....	0.48333
615	734	37	-30.7	-0.04	0.49	29.77	CCAUGAGUUAUGAGUGCCCUAUGCUGGAUGAGGGAGUGGAACCAGAUGAUGUCGAUUGCUGGUGCAACACGACAUCAACUUGGGUUGUGUACGGAACCUGUCAUCACAAAAAAGGUGAGG	.................(((.(..(((((((.((.(((.((((((.((((((((.((((....))))..)))))))).))..)))).).......)))).))))).))..).))).....	........................(((((((........((((((.((((((((.((((....))))..)))))))).))..))))..............))))).))............	0.49167
616	735	37	-30.7	-0.24	0.33	29.31	CAUGAGUUAUGAGUGCCCUAUGCUGGAUGAGGGAGUGGAACCAGAUGAUGUCGAUUGCUGGUGCAACACGACAUCAACUUGGGUUGUGUACGGAACCUGUCAUCACAAAAAAGGUGAGGC	................(((.(..(((((((.((.(((.((((((.((((((((.((((....))))..)))))))).))..)))).).......)))).))))).))..).)))......	.......................(((((((........((((((.((((((((.((((....))))..)))))))).))..))))..............))))).)).............	0.49167
617	736	37	-32.4	-1.49	0.04	28.98	AUGAGUUAUGAGUGCCCUAUGCUGGAUGAGGGAGUGGAACCAGAUGAUGUCGAUUGCUGGUGCAACACGACAUCAACUUGGGUUGUGUACGGAACCUGUCAUCACAAAAAAGGUGAGGCA	............((((.(((..(((((((.((.(((.((((((.((((((((.((((....))))..)))))))).))..)))).).......)))).))))).))......))).))))	.............(((......(((((((........((((.(.((((((((.((((....))))..)))))))).)...))))..............))))).))..........))).	0.48333
618	737	37	-35.1	-1.57	0.07	21.51	UGAGUUAUGAGUGCCCUAUGCUGGAUGAGGGAGUGGAACCAGAUGAUGUCGAUUGCUGGUGCAACACGACAUCAACUUGGGUUGUGUACGGAACCUGUCAUCACAAAAAAGGUGAGGCAC	..........(((((.(((..(((((((.((.(((.((((((.((((((((.((((....))))..)))))))).))..)))).).......)))).))))).))......))).)))))	..........(((((......(((((((.((.....((((((.((((((((.((((....))))..)))))))).))..))))...........)).))))).))..........)))))	0.49167
619	738	37	-36.3	-2.01	0.04	21.04	GAGUUAUGAGUGCCCUAUGCUGGAUGAGGGAGUGGAACCAGAUGAUGUCGAUUGCUGGUGCAACACGACAUCAACUUGGGUUGUGUACGGAACCUGUCAUCACAAAAAAGGUGAGGCACG	.........(((((.(((..(((((((.((.(((.((((((.((((((((.((((....))))..)))))))).))..)))).).......)))).))))).))......))).))))).	.........(((((......(((((((.((.....((((((.((((((((.((((....))))..)))))))).))..))))...........)).))))).))..........))))).	0.5
620	739	37	-36.3	-2.27	0.01	21.21	AGUUAUGAGUGCCCUAUGCUGGAUGAGGGAGUGGAACCAGAUGAUGUCGAUUGCUGGUGCAACACGACAUCAACUUGGGUUGUGUACGGAACCUGUCAUCACAAAAAAGGUGAGGCACGG	........(((((.(((..(((((((.((.(((.((((((.((((((((.((((....))))..)))))))).))..)))).).......)))).))))).))......))).)))))..	........(((((......(((((((.((.....((((((.((((((((.((((....))))..)))))))).))..))))...........)).))))).))..........)))))..	0.5
621	740	37	-36.3	-1.4	0.08	22.04	GUUAUGAGUGCCCUAUGCUGGAUGAGGGAGUGGAACCAGAUGAUGUCGAUUGCUGGUGCAACACGACAUCAACUUGGGUUGUGUACGGAACCUGUCAUCACAAAAAAGGUGAGGCACGGC	.......(((((.(((..(((((((.((.(((.((((((.((((((((.((((....))))..)))))))).))..)))).).......)))).))))).))......))).)))))...	.......(((((......(((((((.((.....((((((.((((((((.((((....))))..)))))))).))..))))...........)).))))).))..........)))))...	0.50833
622	741	37	-36.3	-1.65	0.07	25.66	UUAUGAGUGCCCUAUGCUGGAUGAGGGAGUGGAACCAGAUGAUGUCGAUUGCUGGUGCAACACGACAUCAACUUGGGUUGUGUACGGAACCUGUCAUCACAAAAAAGGUGAGGCACGGCG	......(((((.(((..(((((((.((.(((.((((((.((((((((.((((....))))..)))))))).))..)))).).......)))).))))).))......))).)))))....	......(((((......(((((((........((((.(.((((((((.((((....))))..)))))))).)...))))..............))))).))..........)))))....	0.50833
623	742	37	-36.3	-1.66	0.03	25.88	UAUGAGUGCCCUAUGCUGGAUGAGGGAGUGGAACCAGAUGAUGUCGAUUGCUGGUGCAACACGACAUCAACUUGGGUUGUGUACGGAACCUGUCAUCACAAAAAAGGUGAGGCACGGCGA	.....(((((.(((..(((((((.((.(((.((((((.((((((((.((((....))))..)))))))).))..)))).).......)))).))))).))......))).))))).....	.....(((((......(((((((........((((.(.((((((((.((((....))))..)))))))).)...))))..............))))).))..........))))).....	0.50833
624	743	37	-36.3	-1.47	0.06	25.9	AUGAGUGCCCUAUGCUGGAUGAGGGAGUGGAACCAGAUGAUGUCGAUUGCUGGUGCAACACGACAUCAACUUGGGUUGUGUACGGAACCUGUCAUCACAAAAAAGGUGAGGCACGGCGAU	....(((((.(((..(((((((.((.(((.((((((.((((((((.((((....))))..)))))))).))..)))).).......)))).))))).))......))).)))))......	....(((((......(((((((........((((.(.((((((((.((((....))))..)))))))).)...))))..............))))).))..........)))))......	0.50833
625	744	37	-36.3	-1.28	0.1	26.98	UGAGUGCCCUAUGCUGGAUGAGGGAGUGGAACCAGAUGAUGUCGAUUGCUGGUGCAACACGACAUCAACUUGGGUUGUGUACGGAACCUGUCAUCACAAAAAAGGUGAGGCACGGCGAUC	...(((((.(((..(((((((.((.(((.((((((.((((((((.((((....))))..)))))))).))..)))).).......)))).))))).))......))).))))).......	...(((((......(((((((........((((((.((((((((.((((....))))..)))))))).))..))))..............))))).))..........))))).......	0.51667
626	745	37	-36.3	-1.48	0.06	31.11	GAGUGCCCUAUGCUGGAUGAGGGAGUGGAACCAGAUGAUGUCGAUUGCUGGUGCAACACGACAUCAACUUGGGUUGUGUACGGAACCUGUCAUCACAAAAAAGGUGAGGCACGGCGAUCU	..(((((.(((..(((((((.((.(((.((((((.((((((((.((((....))))..)))))))).))..)))).).......)))).))))).))......))).)))))........	..(((((.......((((((.........(((((.((((((((.((((....))))..)))))))).))..)))...............))))).)...........)))))........	0.51667
627	746	37	-36.3	-1.28	0.14	27.81	AGUGCCCUAUGCUGGAUGAGGGAGUGGAACCAGAUGAUGUCGAUUGCUGGUGCAACACGACAUCAACUUGGGUUGUGUACGGAACCUGUCAUCACAAAAAAGGUGAGGCACGGCGAUCUA	.(((((.(((..(((((((.((.(((.((((((.((((((((.((((....))))..)))))))).))..)))).).......)))).))))).))......))).))))).........	.(((((......(((((((.........(((.(.((((((((.((((....))))..)))))))).)...)))...............))))).))..........))))).........	0.50833
628	747	37	-36.6	-1.3	0.08	26.26	GUGCCCUAUGCUGGAUGAGGGAGUGGAACCAGAUGAUGUCGAUUGCUGGUGCAACACGACAUCAACUUGGGUUGUGUACGGAACCUGUCAUCACAAAAAAGGUGAGGCACGGCGAUCUAG	(((((.(((..(((((((.((.(((.((((((.((((((((.((((....))))..)))))))).))..)))).).......)))).))))).))......))).)))))..........	(((((......(((((((........((((((.((((((((.((((....))))..)))))))).))..))))..............))))).))..........)))))..........	0.51667
629	748	37	-35.1	-0.87	0.18	29.63	UGCCCUAUGCUGGAUGAGGGAGUGGAACCAGAUGAUGUCGAUUGCUGGUGCAACACGACAUCAACUUGGGUUGUGUACGGAACCUGUCAUCACAAAAAAGGUGAGGCACGGCGAUCUAGA	..((((((.....)).)))).......((((.((((((((.((((....))))..)))))))).).)))(((((((.....((((.............))))...)))))))........	..(((............))).......((.(.((((((((.((((....))))..)))))))).)..))(((((((.....((((.............))))...)))))))........	0.50833
630	749	37	-35.1	-1.31	0.08	27.94	GCCCUAUGCUGGAUGAGGGAGUGGAACCAGAUGAUGUCGAUUGCUGGUGCAACACGACAUCAACUUGGGUUGUGUACGGAACCUGUCAUCACAAAAAAGGUGAGGCACGGCGAUCUAGAA	.((((((.....)).)))).......((((.((((((((.((((....))))..)))))))).).)))(((((((.....((((.............))))...))))))).........	.(((............))).......((.(.((((((((.((((....))))..)))))))).)..))(((((((.....((((.............))))...))))))).........	0.50833
631	750	37	-34.9	-1.41	0.08	25.54	CCCUAUGCUGGAUGAGGGAGUGGAACCAGAUGAUGUCGAUUGCUGGUGCAACACGACAUCAACUUGGGUUGUGUACGGAACCUGUCAUCACAAAAAAGGUGAGGCACGGCGAUCUAGAAG	((((((.....)).)))).......((((.((((((((.((((....))))..)))))))).).)))(((((((.....((((.............))))...)))))))..........	(((............))).......((.(.((((((((.((((....))))..)))))))).)..))(((((((.....((((.............))))...)))))))..........	0.50833
632	751	37	-34.8	-1.61	0.05	24.97	CCUAUGCUGGAUGAGGGAGUGGAACCAGAUGAUGUCGAUUGCUGGUGCAACACGACAUCAACUUGGGUUGUGUACGGAACCUGUCAUCACAAAAAAGGUGAGGCACGGCGAUCUAGAAGA	......((((((............((((.((((((((.((((....))))..)))))))).).)))(((((((.....((((.............))))...))))))).))))))....	......((((((............((.(.((((((((.((((....))))..)))))))).)..))(((((((.....((((.............))))...))))))).))))))....	0.5
633	752	37	-34.8	-1.29	0.12	22.38	CUAUGCUGGAUGAGGGAGUGGAACCAGAUGAUGUCGAUUGCUGGUGCAACACGACAUCAACUUGGGUUGUGUACGGAACCUGUCAUCACAAAAAAGGUGAGGCACGGCGAUCUAGAAGAG	.....((((((............((((.((((((((.((((....))))..)))))))).).)))(((((((.....((((.............))))...))))))).)))))).....	.....((((((............((.(.((((((((.((((....))))..)))))))).)..))(((((((.....((((.............))))...))))))).)))))).....	0.5
634	753	37	-34.8	-1.73	0.01	21.83	UAUGCUGGAUGAGGGAGUGGAACCAGAUGAUGUCGAUUGCUGGUGCAACACGACAUCAACUUGGGUUGUGUACGGAACCUGUCAUCACAAAAAAGGUGAGGCACGGCGAUCUAGAAGAGC	....((((((............((((.((((((((.((((....))))..)))))))).).)))(((((((.....((((.............))))...))))))).))))))......	....((((((............((.(.((((((((.((((....))))..)))))))).)..))(((((((.....((((.............))))...))))))).))))))......	0.5
635	754	37	-34.8	-1.64	0.08	25.02	AUGCUGGAUGAGGGAGUGGAACCAGAUGAUGUCGAUUGCUGGUGCAACACGACAUCAACUUGGGUUGUGUACGGAACCUGUCAUCACAAAAAAGGUGAGGCACGGCGAUCUAGAAGAGCC	...((((((............((((.((((((((.((((....))))..)))))))).).)))(((((((.....((((.............))))...))))))).)))))).......	...((((((.............(.(.((((((((.((((....))))..)))))))).)..).(((((((.....(((...............)))...))))))).)))))).......	0.50833
636	755	37	-34.8	-1.36	0.08	32.07	UGCUGGAUGAGGGAGUGGAACCAGAUGAUGUCGAUUGCUGGUGCAACACGACAUCAACUUGGGUUGUGUACGGAACCUGUCAUCACAAAAAAGGUGAGGCACGGCGAUCUAGAAGAGCCG	..((((((............((((.((((((((.((((....))))..)))))))).).)))(((((((.....((((.............))))...))))))).))))))........	.......................(.((((((((.((((....))))..)))))))).)...........................................((((...........))))	0.51667
637	756	37	-35.7	-1.61	0.03	26.36	GCUGGAUGAGGGAGUGGAACCAGAUGAUGUCGAUUGCUGGUGCAACACGACAUCAACUUGGGUUGUGUACGGAACCUGUCAUCACAAAAAAGGUGAGGCACGGCGAUCUAGAAGAGCCGU	........(((..(((.((((((.((((((((.((((....))))..)))))))).))..))))...)))....)))(((.((((.......)))))))(((((...........)))))	..................((..(.((((((((.((((....))))..)))))))).)....))..................((((.......))))...(((((...........)))))	0.51667
638	757	37	-37.6	-2.11	0.02	20.6	CUGGAUGAGGGAGUGGAACCAGAUGAUGUCGAUUGCUGGUGCAACACGACAUCAACUUGGGUUGUGUACGGAACCUGUCAUCACAAAAAAGGUGAGGCACGGCGAUCUAGAAGAGCCGUG	.(((((((.((.(((.((((((.((((((((.((((....))))..)))))))).))..)))).).......)))).))))).))............((((((...........))))))	..((((((........((((((.((((((((.((((....))))..)))))))).))..))))..............))))).).............((((((...........))))))	0.51667
639	758	37	-38.5	-2.74	0	18.56	UGGAUGAGGGAGUGGAACCAGAUGAUGUCGAUUGCUGGUGCAACACGACAUCAACUUGGGUUGUGUACGGAACCUGUCAUCACAAAAAAGGUGAGGCACGGCGAUCUAGAAGAGCCGUGA	(((((((.((.(((.((((((.((((((((.((((....))))..)))))))).))..)))).).......)))).))))).))............((((((...........)))))).	.((((((.((.....((((((.((((((((.((((....))))..)))))))).))..))))...........)).))))).).............((((((...........)))))).	0.50833
640	759	37	-38	-2.31	0.01	20.09	GGAUGAGGGAGUGGAACCAGAUGAUGUCGAUUGCUGGUGCAACACGACAUCAACUUGGGUUGUGUACGGAACCUGUCAUCACAAAAAAGGUGAGGCACGGCGAUCUAGAAGAGCCGUGAC	.(((((.((.(((.((((((.((((((((.((((....))))..)))))))).))..)))).).......)))).)))))...............((((((...........))))))..	.(((((....(...((((((.((((((((.((((....))))..)))))))).))..)))).....)........)))))...............((((((...........))))))..	0.51667
641	760	37	-38.3	-2.44	0	20.55	GAUGAGGGAGUGGAACCAGAUGAUGUCGAUUGCUGGUGCAACACGACAUCAACUUGGGUUGUGUACGGAACCUGUCAUCACAAAAAAGGUGAGGCACGGCGAUCUAGAAGAGCCGUGACG	(((((.((.(((.((((((.((((((((.((((....))))..)))))))).))..)))).).......)))).)))))...............((((((...........))))))...	(((((....((..((((((.((((((((.((((....))))..)))))))).))..))))....))........)))))...............((((((...........))))))...	0.51667
642	761	37	-37.1	-1.55	0.04	18.88	AUGAGGGAGUGGAACCAGAUGAUGUCGAUUGCUGGUGCAACACGACAUCAACUUGGGUUGUGUACGGAACCUGUCAUCACAAAAAAGGUGAGGCACGGCGAUCUAGAAGAGCCGUGACGC	...(((..(((.((((((.((((((((.((((....))))..)))))))).))..))))...)))....))).(((((........)))))..((((((...........))))))....	...(((..(((..(((((.((((((((.((((....))))..)))))))).))..)))....)))....))).(((((........)))))..((((((...........))))))....	0.51667
643	762	37	-37.2	-2.21	0.02	23.26	UGAGGGAGUGGAACCAGAUGAUGUCGAUUGCUGGUGCAACACGACAUCAACUUGGGUUGUGUACGGAACCUGUCAUCACAAAAAAGGUGAGGCACGGCGAUCUAGAAGAGCCGUGACGCU	......((((.....((.((((((((.((((....))))..)))))))).)).(((((........))))).(((((........)))))..((((((...........)))))).))))	...............((.((((((((.((((....))))..)))))))).))....................(((((........)))))..((((((...........)))))).....	0.51667
644	763	37	-39.7	-2.38	0.01	18.87	GAGGGAGUGGAACCAGAUGAUGUCGAUUGCUGGUGCAACACGACAUCAACUUGGGUUGUGUACGGAACCUGUCAUCACAAAAAAGGUGAGGCACGGCGAUCUAGAAGAGCCGUGACGCUC	....(((((.....((.((((((((.((((....))))..)))))))).)).(((((........))))).(((((........)))))..((((((...........)))))).)))))	....(((((.....((.((((((((.((((....))))..)))))))).))..((((........))))..(((((........)))))..((((((...........)))))).)))))	0.525
645	764	37	-43	-3.42	0	16.72	AGGGAGUGGAACCAGAUGAUGUCGAUUGCUGGUGCAACACGACAUCAACUUGGGUUGUGUACGGAACCUGUCAUCACAAAAAAGGUGAGGCACGGCGAUCUAGAAGAGCCGUGACGCUCC	..((((((.....((.((((((((.((((....))))..)))))))).)).(((((........))))).(((((........)))))..((((((...........)))))).))))))	..((((((.....((.((((((((.((((....))))..)))))))).))..((((........))))..(((((........)))))..((((((...........)))))).))))))	0.525
646	765	37	-46.3	-3.67	0	16.66	GGGAGUGGAACCAGAUGAUGUCGAUUGCUGGUGCAACACGACAUCAACUUGGGUUGUGUACGGAACCUGUCAUCACAAAAAAGGUGAGGCACGGCGAUCUAGAAGAGCCGUGACGCUCCC	(((((((.....((.((((((((.((((....))))..)))))))).)).(((((........))))).(((((........)))))..((((((...........)))))).)))))))	(((((((.....((.((((((((.((((....))))..)))))))).))..((((........))))..(((((........)))))..((((((...........)))))).)))))))	0.53333
647	766	37	-43.8	-3.26	0	16.96	GGAGUGGAACCAGAUGAUGUCGAUUGCUGGUGCAACACGACAUCAACUUGGGUUGUGUACGGAACCUGUCAUCACAAAAAAGGUGAGGCACGGCGAUCUAGAAGAGCCGUGACGCUCCCU	((((((.....((.((((((((.((((....))))..)))))))).)).(((((........))))).(((((........)))))..((((((...........)))))).))))))..	((((((.....((.((((((((.((((....))))..)))))))).))..((((........))))..(((((........)))))..((((((...........)))))).))))))..	0.525
648	767	37	-41.9	-2.71	0	16.65	GAGUGGAACCAGAUGAUGUCGAUUGCUGGUGCAACACGACAUCAACUUGGGUUGUGUACGGAACCUGUCAUCACAAAAAAGGUGAGGCACGGCGAUCUAGAAGAGCCGUGACGCUCCCUU	........((((.((((((((.((((....))))..)))))))).).))).(((((.((((...))))...)))))..((((.((((((((((...........)))))).).)))))))	........((((.((((((((.((((....))))..)))))))).).)))..((((.((((...))))...))))...((((.((((((((((...........)))))).).)))))))	0.51667
649	768	37	-42.3	-3.22	0	11.55	AGUGGAACCAGAUGAUGUCGAUUGCUGGUGCAACACGACAUCAACUUGGGUUGUGUACGGAACCUGUCAUCACAAAAAAGGUGAGGCACGGCGAUCUAGAAGAGCCGUGACGCUCCCUUC	.......((((.((((((((.((((....))))..)))))))).).))).(((((.((((...))))...)))))..((((.((((((((((...........)))))).).))))))).	.......((((.((((((((.((((....))))..)))))))).).)))..((((.((((...))))...))))...((((.((((((((((...........)))))).).))))))).	0.51667
650	769	37	-42.3	-2.64	0	12.31	GUGGAACCAGAUGAUGUCGAUUGCUGGUGCAACACGACAUCAACUUGGGUUGUGUACGGAACCUGUCAUCACAAAAAAGGUGAGGCACGGCGAUCUAGAAGAGCCGUGACGCUCCCUUCU	......((((.((((((((.((((....))))..)))))))).).))).(((((.((((...))))...)))))..((((.((((((((((...........)))))).).)))))))..	......((((.((((((((.((((....))))..)))))))).).)))..((((.((((...))))...))))...((((.((((((((((...........)))))).).)))))))..	0.51667
651	770	37	-42.3	-3.08	0	10.38	UGGAACCAGAUGAUGUCGAUUGCUGGUGCAACACGACAUCAACUUGGGUUGUGUACGGAACCUGUCAUCACAAAAAAGGUGAGGCACGGCGAUCUAGAAGAGCCGUGACGCUCCCUUCUC	.....((((.((((((((.((((....))))..)))))))).).))).(((((.((((...))))...)))))..((((.((((((((((...........)))))).).)))))))...	.....((((.((((((((.((((....))))..)))))))).).))).(((((.((((...))))...)))))..((((.((((((((((...........)))))).).)))))))...	0.51667
652	771	37	-42.3	-3.04	0.02	10.51	GGAACCAGAUGAUGUCGAUUGCUGGUGCAACACGACAUCAACUUGGGUUGUGUACGGAACCUGUCAUCACAAAAAAGGUGAGGCACGGCGAUCUAGAAGAGCCGUGACGCUCCCUUCUCA	....((((.((((((((.((((....))))..)))))))).).))).(((((.((((...))))...)))))..((((.((((((((((...........)))))).).)))))))....	....((((.((((((((.((((....))))..)))))))).).))).(((((.((((...))))...)))))..((((.((((((((((...........)))))).).)))))))....	0.51667
653	772	37	-42.3	-3.11	0.01	10.09	GAACCAGAUGAUGUCGAUUGCUGGUGCAACACGACAUCAACUUGGGUUGUGUACGGAACCUGUCAUCACAAAAAAGGUGAGGCACGGCGAUCUAGAAGAGCCGUGACGCUCCCUUCUCAC	...((((.((((((((.((((....))))..)))))))).).))).(((((.((((...))))...)))))..((((.((((((((((...........)))))).).))))))).....	...((((.((((((((.((((....))))..)))))))).).))).(((((.((((...))))...)))))..((((.((((((((((...........)))))).).))))))).....	0.51667
654	773	37	-42.3	-3.98	0	9.61	AACCAGAUGAUGUCGAUUGCUGGUGCAACACGACAUCAACUUGGGUUGUGUACGGAACCUGUCAUCACAAAAAAGGUGAGGCACGGCGAUCUAGAAGAGCCGUGACGCUCCCUUCUCACU	..((((.((((((((.((((....))))..)))))))).).))).(((((.((((...))))...)))))..((((.((((((((((...........)))))).).)))))))......	..((((.((((((((.((((....))))..)))))))).).))).(((((.((((...))))...)))))..((((.((((((((((...........)))))).).)))))))......	0.50833
655	774	37	-42.3	-3.28	0	9.34	ACCAGAUGAUGUCGAUUGCUGGUGCAACACGACAUCAACUUGGGUUGUGUACGGAACCUGUCAUCACAAAAAAGGUGAGGCACGGCGAUCUAGAAGAGCCGUGACGCUCCCUUCUCACUC	.((((.((((((((.((((....))))..)))))))).).))).(((((.((((...))))...)))))..((((.((((((((((...........)))))).).))))))).......	.((((.((((((((.((((....))))..)))))))).).))).(((((.((((...))))...)))))..((((.((((((((((...........)))))).).))))))).......	0.51667
656	775	37	-42	-3.04	0	9.52	CCAGAUGAUGUCGAUUGCUGGUGCAACACGACAUCAACUUGGGUUGUGUACGGAACCUGUCAUCACAAAAAAGGUGAGGCACGGCGAUCUAGAAGAGCCGUGACGCUCCCUUCUCACUCU	((((.((((((((.((((....))))..)))))))).).))).(((((.((((...))))...)))))..((((.((((((((((...........)))))).).)))))))........	((((.((((((((.((((....))))..)))))))).).))).(((((.((((...))))...)))))..((((.((((((((((...........)))))).).)))))))........	0.51667
657	776	37	-39.2	-2.38	0.01	15.54	CAGAUGAUGUCGAUUGCUGGUGCAACACGACAUCAACUUGGGUUGUGUACGGAACCUGUCAUCACAAAAAAGGUGAGGCACGGCGAUCUAGAAGAGCCGUGACGCUCCCUUCUCACUCUA	.((.((((((((.((((....))))..)))))))).))....(((((.((((...))))...)))))..((((.((((((((((...........)))))).).))))))).........	.((.((((((((.((((....))))..)))))))).)).....((((.((((...))))...))))...((((.((((((((((...........)))))).).))))))).........	0.50833
658	777	37	-38.7	-2.16	0.02	16.1	AGAUGAUGUCGAUUGCUGGUGCAACACGACAUCAACUUGGGUUGUGUACGGAACCUGUCAUCACAAAAAAGGUGAGGCACGGCGAUCUAGAAGAGCCGUGACGCUCCCUUCUCACUCUAC	((.((((((((.((((....))))..)))))))).))....(((((.((((...))))...)))))..((((.((((((((((...........)))))).).)))))))..........	...((((((((.((((....))))..))))))))........((((.((((...))))...))))...((((.((((((((((...........)))))).).)))))))..........	0.50833
659	778	37	-38.5	-2.17	0.03	15.65	GAUGAUGUCGAUUGCUGGUGCAACACGACAUCAACUUGGGUUGUGUACGGAACCUGUCAUCACAAAAAAGGUGAGGCACGGCGAUCUAGAAGAGCCGUGACGCUCCCUUCUCACUCUACA	..((((((((.((((....))))..)))))))).......(((((.((((...))))...)))))..((((.((((((((((...........)))))).).)))))))...........	..((((((((.((((....))))..))))))))........((((.((((...))))...))))...((((.((((((((((...........)))))).).)))))))...........	0.50833
660	779	37	-38.5	-2.88	0	14.82	AUGAUGUCGAUUGCUGGUGCAACACGACAUCAACUUGGGUUGUGUACGGAACCUGUCAUCACAAAAAAGGUGAGGCACGGCGAUCUAGAAGAGCCGUGACGCUCCCUUCUCACUCUACAA	.((((((((.((((....))))..)))))))).......(((((.((((...))))...)))))..((((.((((((((((...........)))))).).)))))))............	.((((((((.((((....))))..))))))))........((((.((((...))))...))))...((((.((((((((((...........)))))).).)))))))............	0.5
661	780	37	-39.1	-2.9	0	15.46	UGAUGUCGAUUGCUGGUGCAACACGACAUCAACUUGGGUUGUGUACGGAACCUGUCAUCACAAAAAAGGUGAGGCACGGCGAUCUAGAAGAGCCGUGACGCUCCCUUCUCACUCUACAAG	((((((((.((((....))))..)))))))).((((..(((((.((((...))))...)))))..((((.((((((((((...........)))))).).))))))).........))))	((((((((.((((....))))..))))))))........((((.((((...))))...))))...((((.((((((((((...........)))))).).))))))).............	0.50833
662	781	37	-39.5	-2.53	0	13.32	GAUGUCGAUUGCUGGUGCAACACGACAUCAACUUGGGUUGUGUACGGAACCUGUCAUCACAAAAAAGGUGAGGCACGGCGAUCUAGAAGAGCCGUGACGCUCCCUUCUCACUCUACAAGG	(((((((.((((....))))..)))))))..((((..(((((.((((...))))...)))))..((((.((((((((((...........)))))).).))))))).........)))).	(((((((.((((....))))..)))))))..((((...((((.((((...))))...))))...((((.((((((((((...........)))))).).))))))).........)))).	0.51667
663	782	37	-35	-1.49	0.1	27.81	AUGUCGAUUGCUGGUGCAACACGACAUCAACUUGGGUUGUGUACGGAACCUGUCAUCACAAAAAAGGUGAGGCACGGCGAUCUAGAAGAGCCGUGACGCUCCCUUCUCACUCUACAAGGA	((((((.((((....))))..))))))...((((..(((((.((((...))))...)))))..((((.((((((((((...........)))))).).))))))).........))))..	.(((((.((((....))))..)))))....((((........((((...))))..........((((.((((((((((...........)))))).).))))))).........))))..	0.50833
664	783	37	-34.4	-0.99	0.12	27.73	UGUCGAUUGCUGGUGCAACACGACAUCAACUUGGGUUGUGUACGGAACCUGUCAUCACAAAAAAGGUGAGGCACGGCGAUCUAGAAGAGCCGUGACGCUCCCUUCUCACUCUACAAGGAA	(((((.((((....))))..)))))....((((..(((((.((((...))))...)))))..((((.((((((((((...........)))))).).))))))).........))))...	.((.(((.((.(((...(((((((..(.....).))))))).....))).)).)))))....((((.((((((((((...........)))))).).)))))))................	0.50833
665	784	37	-33.9	-0.89	0.18	28.71	GUCGAUUGCUGGUGCAACACGACAUCAACUUGGGUUGUGUACGGAACCUGUCAUCACAAAAAAGGUGAGGCACGGCGAUCUAGAAGAGCCGUGACGCUCCCUUCUCACUCUACAAGGAAG	((((.((((....))))..)))).....((((..(((((.((((...))))...)))))..((((.((((((((((...........)))))).).))))))).........))))....	...(((.((.(((...(((((((..(.....).))))))).....))).)).)))......((((.((((((((((...........)))))).).))))))).................	0.51667
666	785	37	-32.9	-0.85	0.16	24.98	UCGAUUGCUGGUGCAACACGACAUCAACUUGGGUUGUGUACGGAACCUGUCAUCACAAAAAAGGUGAGGCACGGCGAUCUAGAAGAGCCGUGACGCUCCCUUCUCACUCUACAAGGAAGU	..(((.((.(((...(((((((.(((...)))))))))).....))).)).)))......((((.((((((((((...........)))))).).)))))))..................	..(((.((.(((...(((((((.(((...)))))))))).....))).)).)))......((((.((((((((((...........)))))).).)))))))..................	0.50833
667	786	37	-32.9	-0.79	0.18	23.9	CGAUUGCUGGUGCAACACGACAUCAACUUGGGUUGUGUACGGAACCUGUCAUCACAAAAAAGGUGAGGCACGGCGAUCUAGAAGAGCCGUGACGCUCCCUUCUCACUCUACAAGGAAGUU	.(((.((.(((...(((((((.(((...)))))))))).....))).)).)))......((((.((((((((((...........)))))).).)))))))...................	.(((.((.(((...(((((((.(((...)))))))))).....))).)).)))......((((.((((((((((...........)))))).).)))))))......(......).....	0.50833
668	787	37	-33.1	-0.55	0.28	19.39	GAUUGCUGGUGCAACACGACAUCAACUUGGGUUGUGUACGGAACCUGUCAUCACAAAAAAGGUGAGGCACGGCGAUCUAGAAGAGCCGUGACGCUCCCUUCUCACUCUACAAGGAAGUUG	(((.((.(((...(((((((.(((...)))))))))).....))).)).)))......((((.((((((((((...........)))))).).)))))))....................	(((.((.(((...(((((((.(((...)))))))))).....))).)).)))......((((.((((((((((...........)))))).).)))))))......((....))......	0.50833
669	788	37	-31.1	-0.16	0.4	30.11	AUUGCUGGUGCAACACGACAUCAACUUGGGUUGUGUACGGAACCUGUCAUCACAAAAAAGGUGAGGCACGGCGAUCUAGAAGAGCCGUGACGCUCCCUUCUCACUCUACAAGGAAGUUGC	.((((....))))..((((.((..((((..(((((.((((...))))...)))))..((((.((((((((((...........)))))).).))))))).........)))))).)))).	............(((((((.((.....))))))))).....................((((.((((((((((...........)))))).).))))))).....................	0.50833
670	789	37	-31.8	-0.62	0.28	33.12	UUGCUGGUGCAACACGACAUCAACUUGGGUUGUGUACGGAACCUGUCAUCACAAAAAAGGUGAGGCACGGCGAUCUAGAAGAGCCGUGACGCUCCCUUCUCACUCUACAAGGAAGUUGCA	.......((((((.(((((.((((....))))))).))...(((............((((.((((((((((...........)))))).).)))))))...........)))..))))))	...........(((((((..(.....).))))))).....................((((.((((((((((...........)))))).).)))))))......................	0.50833
671	790	37	-32.4	-1.12	0.15	32.39	UGCUGGUGCAACACGACAUCAACUUGGGUUGUGUACGGAACCUGUCAUCACAAAAAAGGUGAGGCACGGCGAUCUAGAAGAGCCGUGACGCUCCCUUCUCACUCUACAAGGAAGUUGCAA	......((((((.(((((.((((....))))))).))...(((............((((.((((((((((...........)))))).).)))))))...........)))..)))))).	.......(((.((((((..(.....).))))))......................((((.((((((((((...........)))))).).)))))))..................)))..	0.50833
672	791	37	-32.4	-1.06	0.14	29.7	GCUGGUGCAACACGACAUCAACUUGGGUUGUGUACGGAACCUGUCAUCACAAAAAAGGUGAGGCACGGCGAUCUAGAAGAGCCGUGACGCUCCCUUCUCACUCUACAAGGAAGUUGCAAA	.....((((((.(((((.((((....))))))).))...(((............((((.((((((((((...........)))))).).)))))))...........)))..))))))..	.....((((((...........................................((((.((((((((((...........)))))).).)))))))................))))))..	0.50833
673	792	37	-32.4	-1.39	0.05	26.55	CUGGUGCAACACGACAUCAACUUGGGUUGUGUACGGAACCUGUCAUCACAAAAAAGGUGAGGCACGGCGAUCUAGAAGAGCCGUGACGCUCCCUUCUCACUCUACAAGGAAGUUGCAAAC	....((((((.(((((.((((....))))))).))...(((............((((.((((((((((...........)))))).).)))))))...........)))..))))))...	....((((((...........................................((((.((((((((((...........)))))).).)))))))................))))))...	0.50833
674	793	37	-32.4	-1.04	0.17	26.71	UGGUGCAACACGACAUCAACUUGGGUUGUGUACGGAACCUGUCAUCACAAAAAAGGUGAGGCACGGCGAUCUAGAAGAGCCGUGACGCUCCCUUCUCACUCUACAAGGAAGUUGCAAACG	...((((((.(((((.((((....))))))).))...(((............((((.((((((((((...........)))))).).)))))))...........)))..))))))....	...((((((...........................................((((.((((((((((...........)))))).).)))))))................))))))....	0.50833
675	794	37	-32.4	-0.84	0.15	26.57	GGUGCAACACGACAUCAACUUGGGUUGUGUACGGAACCUGUCAUCACAAAAAAGGUGAGGCACGGCGAUCUAGAAGAGCCGUGACGCUCCCUUCUCACUCUACAAGGAAGUUGCAAACGC	..((((((.(((((.((((....))))))).))...(((............((((.((((((((((...........)))))).).)))))))...........)))..)))))).....	..((((((...........................................((((.((((((((((...........)))))).).)))))))................)))))).....	0.51667
676	795	37	-32.4	-0.72	0.24	26.9	GUGCAACACGACAUCAACUUGGGUUGUGUACGGAACCUGUCAUCACAAAAAAGGUGAGGCACGGCGAUCUAGAAGAGCCGUGACGCUCCCUUCUCACUCUACAAGGAAGUUGCAAACGCG	.((((((.(((((.((((....))))))).))...(((............((((.((((((((((...........)))))).).)))))))...........)))..))))))......	.((((((...........................................((((.((((((((((...........)))))).).)))))))................))))))......	0.51667
677	796	37	-32.4	-1.02	0.14	26.46	UGCAACACGACAUCAACUUGGGUUGUGUACGGAACCUGUCAUCACAAAAAAGGUGAGGCACGGCGAUCUAGAAGAGCCGUGACGCUCCCUUCUCACUCUACAAGGAAGUUGCAAACGCGG	((((((.(((((.((((....))))))).))...(((............((((.((((((((((...........)))))).).)))))))...........)))..)))))).......	((((((...........................................((((.((((((((((...........)))))).).)))))))................)))))).......	0.51667
678	797	37	-31.7	-0.76	0.21	28.95	GCAACACGACAUCAACUUGGGUUGUGUACGGAACCUGUCAUCACAAAAAAGGUGAGGCACGGCGAUCUAGAAGAGCCGUGACGCUCCCUUCUCACUCUACAAGGAAGUUGCAAACGCGGU	(((((.(((((.((((....))))))).))...(((............((((.((((((((((...........)))))).).)))))))...........)))..))))).........	(((((...........................................((((.((((((((((...........)))))).).)))))))................))))).........	0.51667
679	798	37	-29.8	-0.53	0.3	27.4	CAACACGACAUCAACUUGGGUUGUGUACGGAACCUGUCAUCACAAAAAAGGUGAGGCACGGCGAUCUAGAAGAGCCGUGACGCUCCCUUCUCACUCUACAAGGAAGUUGCAAACGCGGUC	..(((((((.(((...))))))))))......(((............((((.((((((((((...........)))))).).)))))))...........)))...((((....))))..	..(((((((.(((...)))))))))).....................((((.((((((((((...........)))))).).)))))))...................((....))....	0.51667
680	799	37	-29.8	-0.08	0.45	32.44	AACACGACAUCAACUUGGGUUGUGUACGGAACCUGUCAUCACAAAAAAGGUGAGGCACGGCGAUCUAGAAGAGCCGUGACGCUCCCUUCUCACUCUACAAGGAAGUUGCAAACGCGGUCG	.(((((((.(((...))))))))))......(((............((((.((((((((((...........)))))).).)))))))...........)))...((((....))))...	.(((((((.((.....))))))))).....................((((.((((((((((...........)))))).).)))))))...................((....)).....	0.51667
681	800	37	-30.1	-0.16	0.42	35.09	ACACGACAUCAACUUGGGUUGUGUACGGAACCUGUCAUCACAAAAAAGGUGAGGCACGGCGAUCUAGAAGAGCCGUGACGCUCCCUUCUCACUCUACAAGGAAGUUGCAAACGCGGUCGC	...((((....((((...(((((.((((...))))...)))))...))))((((((((((...........)))))).).))).(((((..........))))).(((....))))))).	...(................)........................((((.((((((((((...........)))))).).)))))))...................((....))......	0.525
682	801	37	-30.1	-0.19	0.38	31.12	CACGACAUCAACUUGGGUUGUGUACGGAACCUGUCAUCACAAAAAAGGUGAGGCACGGCGAUCUAGAAGAGCCGUGACGCUCCCUUCUCACUCUACAAGGAAGUUGCAAACGCGGUCGCA	..((((....((((...(((((.((((...))))...)))))...))))((((((((((...........)))))).).))).(((((..........))))).(((....)))))))..	..((((.................(((.....)))..........((((.((((((((((...........)))))).).)))))))...................((....)).))))..	0.525
683	802	37	-30.1	0	0.42	29.19	ACGACAUCAACUUGGGUUGUGUACGGAACCUGUCAUCACAAAAAAGGUGAGGCACGGCGAUCUAGAAGAGCCGUGACGCUCCCUUCUCACUCUACAAGGAAGUUGCAAACGCGGUCGCAG	.((((....((((...(((((.((((...))))...)))))...))))((((((((((...........)))))).).))).(((((..........))))).(((....)))))))...	.((((.................((((...))))..........((((.((((((((((...........)))))).).)))))))...................((....)).))))...	0.525
684	803	37	-30.1	-0.03	0.42	32.39	CGACAUCAACUUGGGUUGUGUACGGAACCUGUCAUCACAAAAAAGGUGAGGCACGGCGAUCUAGAAGAGCCGUGACGCUCCCUUCUCACUCUACAAGGAAGUUGCAAACGCGGUCGCAGA	(((((.((((....))))))).))....((((.(((......((((.((((((((((...........)))))).).)))))))...(((((....)).))).((....))))).)))).	.(((......................................((((.((((((((((...........)))))).).)))))))...................((....)).))).....	0.525
685	804	37	-28.4	0.28	0.61	33.31	GACAUCAACUUGGGUUGUGUACGGAACCUGUCAUCACAAAAAAGGUGAGGCACGGCGAUCUAGAAGAGCCGUGACGCUCCCUUCUCACUCUACAAGGAAGUUGCAAACGCGGUCGCAGAC	.(((.((((....))))))).......((((.(((......((((.((((((((((...........)))))).).)))))))...(((((....)).))).((....))))).))))..	.........................................((((.((((((((((...........)))))).).)))))))...................((....))..........	0.525
686	805	37	-29.2	0.06	0.44	31.7	ACAUCAACUUGGGUUGUGUACGGAACCUGUCAUCACAAAAAAGGUGAGGCACGGCGAUCUAGAAGAGCCGUGACGCUCCCUUCUCACUCUACAAGGAAGUUGCAAACGCGGUCGCAGACC	....((((((...(((((.((((...))))...)))))..((((.((((((((((...........)))))).).)))))))..............)))))).......((((...))))	........................................((((.((((((((((...........)))))).).)))))))...........................((((...))))	0.525
687	806	37	-30.3	0.09	0.48	32.01	CAUCAACUUGGGUUGUGUACGGAACCUGUCAUCACAAAAAAGGUGAGGCACGGCGAUCUAGAAGAGCCGUGACGCUCCCUUCUCACUCUACAAGGAAGUUGCAAACGCGGUCGCAGACCU	...((((((...(((((.((((...))))...)))))..((((.((((((((((...........)))))).).)))))))..............)))))).......((((...)))).	.......................................((((.((((((((((...........)))))).).)))))))...........................((((...)))).	0.525
688	807	37	-30.3	-0.02	0.42	33.36	AUCAACUUGGGUUGUGUACGGAACCUGUCAUCACAAAAAAGGUGAGGCACGGCGAUCUAGAAGAGCCGUGACGCUCCCUUCUCACUCUACAAGGAAGUUGCAAACGCGGUCGCAGACCUG	..((((((...(((((.((((...))))...)))))..((((.((((((((((...........)))))).).)))))))..............)))))).......((((...))))..	......................................((((.((((((((((...........)))))).).)))))))........................................	0.525
689	808	37	-30.3	0.48	0.66	34.55	UCAACUUGGGUUGUGUACGGAACCUGUCAUCACAAAAAAGGUGAGGCACGGCGAUCUAGAAGAGCCGUGACGCUCCCUUCUCACUCUACAAGGAAGUUGCAAACGCGGUCGCAGACCUGG	.((((((...(((((.((((...))))...)))))..((((.((((((((((...........)))))).).)))))))..............)))))).......((((...))))...	............(((......................((((.((((((((((...........)))))).).)))))))..............................)))........	0.53333
690	809	37	-31	0.31	0.61	34.9	CAACUUGGGUUGUGUACGGAACCUGUCAUCACAAAAAAGGUGAGGCACGGCGAUCUAGAAGAGCCGUGACGCUCCCUUCUCACUCUACAAGGAAGUUGCAAACGCGGUCGCAGACCUGGU	((((((...(((((.((((...))))...)))))..((((.((((((((((...........)))))).).)))))))..............))))))...((..((((...))))..))	..........((((..(...................((((.((((((((((...........)))))).).)))))))...........................)..))))........	0.53333
691	810	37	-31.4	0.2	0.51	30.13	AACUUGGGUUGUGUACGGAACCUGUCAUCACAAAAAAGGUGAGGCACGGCGAUCUAGAAGAGCCGUGACGCUCCCUUCUCACUCUACAAGGAAGUUGCAAACGCGGUCGCAGACCUGGUU	((((.((..((((..((...(((............((((.((((((((((...........)))))).).)))))))...........)))............))..))))..)).))))	.(((.((..((((..((..................((((.((((((((((...........)))))).).)))))))..........................))..))))..)).))).	0.525
692	811	37	-31.6	0.21	0.54	34.13	ACUUGGGUUGUGUACGGAACCUGUCAUCACAAAAAAGGUGAGGCACGGCGAUCUAGAAGAGCCGUGACGCUCCCUUCUCACUCUACAAGGAAGUUGCAAACGCGGUCGCAGACCUGGUUA	.((((..(((((.((((...))))...)))))..((((.((((((((((...........)))))).).))))))).........)))).........(((..((((...))))..))).	........((((..(...................((((.((((((((((...........)))))).).)))))))...........................)..))))..........	0.525
693	812	37	-31.3	0.44	0.66	34.14	CUUGGGUUGUGUACGGAACCUGUCAUCACAAAAAAGGUGAGGCACGGCGAUCUAGAAGAGCCGUGACGCUCCCUUCUCACUCUACAAGGAAGUUGCAAACGCGGUCGCAGACCUGGUUAG	((((..(((((.((((...))))...)))))..((((.((((((((((...........)))))).).))))))).........)))).........(((..((((...))))..)))..	........(((......................((((.((((((((((...........)))))).).)))))))..............................)))............	0.53333
694	813	37	-29.9	0.45	0.67	35.05	UUGGGUUGUGUACGGAACCUGUCAUCACAAAAAAGGUGAGGCACGGCGAUCUAGAAGAGCCGUGACGCUCCCUUCUCACUCUACAAGGAAGUUGCAAACGCGGUCGCAGACCUGGUUAGA	.....(((((.((((...))))...)))))..((((.((((((((((...........)))))).).)))))))......................(((..((((...))))..)))...	................................((((.((((((((((...........)))))).).)))))))..............................................	0.525
695	814	37	-30.6	0.22	0.52	34.14	UGGGUUGUGUACGGAACCUGUCAUCACAAAAAAGGUGAGGCACGGCGAUCUAGAAGAGCCGUGACGCUCCCUUCUCACUCUACAAGGAAGUUGCAAACGCGGUCGCAGACCUGGUUAGAA	....(((((.((((...))))...)))))..((((.((((((((((...........)))))).).))))))).....(((((.(((...((((..........)))).))).).)))).	...............................((((.((((((((((...........)))))).).)))))))...............................................	0.525
696	815	37	-30.6	0.17	0.52	33.33	GGGUUGUGUACGGAACCUGUCAUCACAAAAAAGGUGAGGCACGGCGAUCUAGAAGAGCCGUGACGCUCCCUUCUCACUCUACAAGGAAGUUGCAAACGCGGUCGCAGACCUGGUUAGAAU	...(((((.((((...))))...)))))..((((.((((((((((...........)))))).).))))))).....(((((.(((...((((..........)))).))).).))))..	..............................((((.((((((((((...........)))))).).)))))))................................................	0.525
697	816	37	-30.6	0.04	0.5	27.03	GGUUGUGUACGGAACCUGUCAUCACAAAAAAGGUGAGGCACGGCGAUCUAGAAGAGCCGUGACGCUCCCUUCUCACUCUACAAGGAAGUUGCAAACGCGGUCGCAGACCUGGUUAGAAUC	..(((((.((((...))))...)))))..((((.((((((((((...........)))))).).))))))).....(((((.(((...((((..........)))).))).).))))...	...((((.((((...))))...))))...((((.((((((((((...........)))))).).))))))).................................................	0.525
698	817	37	-30.6	-0.06	0.46	22.5	GUUGUGUACGGAACCUGUCAUCACAAAAAAGGUGAGGCACGGCGAUCUAGAAGAGCCGUGACGCUCCCUUCUCACUCUACAAGGAAGUUGCAAACGCGGUCGCAGACCUGGUUAGAAUCA	.(((((.((((...))))...)))))..((((.((((((((((...........)))))).).))))))).....(((((.(((...((((..........)))).))).).))))....	.(((((.((((...))))...)))))..((((.((((((((((...........)))))).).)))))))...........................(((.....)))............	0.51667
699	818	37	-30.6	-0.57	0.24	20.05	UUGUGUACGGAACCUGUCAUCACAAAAAAGGUGAGGCACGGCGAUCUAGAAGAGCCGUGACGCUCCCUUCUCACUCUACAAGGAAGUUGCAAACGCGGUCGCAGACCUGGUUAGAAUCAA	(((((.((((...))))...)))))..((((.((((((((((...........)))))).).))))))).....(((((.(((...((((..........)))).))).).)))).....	(((((.((((...))))...)))))..((((.((((((((((...........)))))).).)))))))...........................((((...)))).............	0.50833
700	819	37	-29.7	0	0.47	22.18	UGUGUACGGAACCUGUCAUCACAAAAAAGGUGAGGCACGGCGAUCUAGAAGAGCCGUGACGCUCCCUUCUCACUCUACAAGGAAGUUGCAAACGCGGUCGCAGACCUGGUUAGAAUCAAG	((((.((((...))))...))))...((((.((((((((((...........)))))).).))))))).....(((((.(((...((((..........)))).))).).))))......	((((.((((...))))...))))...((((.((((((((((...........)))))).).)))))))...........................((((...))))..............	0.51667
701	820	37	-29	0.01	0.53	25.42	GUGUACGGAACCUGUCAUCACAAAAAAGGUGAGGCACGGCGAUCUAGAAGAGCCGUGACGCUCCCUUCUCACUCUACAAGGAAGUUGCAAACGCGGUCGCAGACCUGGUUAGAAUCAAGA	(((.((((...))))...)))....((((.((((((((((...........)))))).).))))))).....(((((.(((...((((..........)))).))).).)))).......	(((.((((...))))...)))....((((.((((((((((...........)))))).).)))))))...........................((((...))))...............	0.51667
702	821	37	-28	0.12	0.5	27.87	UGUACGGAACCUGUCAUCACAAAAAAGGUGAGGCACGGCGAUCUAGAAGAGCCGUGACGCUCCCUUCUCACUCUACAAGGAAGUUGCAAACGCGGUCGCAGACCUGGUUAGAAUCAAGAG	((((.....(((............((((.((((((((((...........)))))).).)))))))...........)))....))))(((..((((...))))..)))...........	........................((((.((((((((((...........)))))).).)))))))...........................((((...))))................	0.51667
703	822	37	-27.3	0.21	0.5	28.16	GUACGGAACCUGUCAUCACAAAAAAGGUGAGGCACGGCGAUCUAGAAGAGCCGUGACGCUCCCUUCUCACUCUACAAGGAAGUUGCAAACGCGGUCGCAGACCUGGUUAGAAUCAAGAGA	(((.....(((............((((.((((((((((...........)))))).).)))))))...........)))....))).(((..((((...))))..)))............	.......................((((.((((((((((...........)))))).).)))))))...........................((((...)))).................	0.51667
704	823	37	-27.4	-0.14	0.37	28.32	UACGGAACCUGUCAUCACAAAAAAGGUGAGGCACGGCGAUCUAGAAGAGCCGUGACGCUCCCUUCUCACUCUACAAGGAAGUUGCAAACGCGGUCGCAGACCUGGUUAGAAUCAAGAGAA	.((((...))))...........(((.((((((((((...........)))))).).))))))((((..(((((.(((...((((..........)))).))).).)))).....)))).	.......................(((.((((((((((...........)))))).).)))))).(((........................((((...)))).............)))..	0.50833
705	824	37	-27.1	0.05	0.46	29.3	ACGGAACCUGUCAUCACAAAAAAGGUGAGGCACGGCGAUCUAGAAGAGCCGUGACGCUCCCUUCUCACUCUACAAGGAAGUUGCAAACGCGGUCGCAGACCUGGUUAGAAUCAAGAGAAU	....(((((.(((((........))))).)((((((...........))))))..(((.((((..........)))).))).((....))((((...)))).))))..............	......................(((.((((((((((...........)))))).).)))))).(((........................((((...)))).............)))...	0.50833
706	825	37	-27.1	0.02	0.48	29.47	CGGAACCUGUCAUCACAAAAAAGGUGAGGCACGGCGAUCUAGAAGAGCCGUGACGCUCCCUUCUCACUCUACAAGGAAGUUGCAAACGCGGUCGCAGACCUGGUUAGAAUCAAGAGAAUA	...(((((.(((((........))))).)((((((...........))))))..(((.((((..........)))).))).((....))((((...)))).))))...............	.....................(((.((((((((((...........)))))).).)))))).(((........................((((...)))).............)))....	0.50833
707	826	37	-27.1	-0.02	0.5	28.77	GGAACCUGUCAUCACAAAAAAGGUGAGGCACGGCGAUCUAGAAGAGCCGUGACGCUCCCUUCUCACUCUACAAGGAAGUUGCAAACGCGGUCGCAGACCUGGUUAGAAUCAAGAGAAUAC	..(((((.(((((........))))).)((((((...........))))))..(((.((((..........)))).))).((....))((((...)))).))))................	....................(((.((((((((((...........)))))).).)))))).(((........................((((...)))).............))).....	0.50833
708	827	37	-27.1	-0.42	0.34	27.53	GAACCUGUCAUCACAAAAAAGGUGAGGCACGGCGAUCUAGAAGAGCCGUGACGCUCCCUUCUCACUCUACAAGGAAGUUGCAAACGCGGUCGCAGACCUGGUUAGAAUCAAGAGAAUACA	.(((((.(((((........))))).)((((((...........))))))..(((.((((..........)))).))).((....))((((...)))).)))).................	...................(((.((((((((((...........)))))).).))))))..(.........................((((...))))..............).......	0.5
709	828	37	-27.1	-0.31	0.39	27.17	AACCUGUCAUCACAAAAAAGGUGAGGCACGGCGAUCUAGAAGAGCCGUGACGCUCCCUUCUCACUCUACAAGGAAGUUGCAAACGCGGUCGCAGACCUGGUUAGAAUCAAGAGAAUACAC	..................(((.((((((((((...........)))))).).))))))((((..(((((.(((...((((..........)))).))).).)))).....))))......	..................(((.((((((((((...........)))))).).)))))).(((........................((((...)))).............))).......	0.5
710	829	37	-27.1	-0.07	0.47	25.85	ACCUGUCAUCACAAAAAAGGUGAGGCACGGCGAUCUAGAAGAGCCGUGACGCUCCCUUCUCACUCUACAAGGAAGUUGCAAACGCGGUCGCAGACCUGGUUAGAAUCAAGAGAAUACACG	.................(((.((((((((((...........)))))).).))))))((((..(((((.(((...((((..........)))).))).).)))).....)))).......	.................(((.((((((((((...........)))))).).)))))).(((........................((((...)))).............)))........	0.50833
711	830	37	-27.1	-0.17	0.44	25.38	CCUGUCAUCACAAAAAAGGUGAGGCACGGCGAUCUAGAAGAGCCGUGACGCUCCCUUCUCACUCUACAAGGAAGUUGCAAACGCGGUCGCAGACCUGGUUAGAAUCAAGAGAAUACACGA	................(((.((((((((((...........)))))).).))))))((((..(((((.(((...((((..........)))).))).).)))).....))))........	................(((.((((((((((...........)))))).).)))))).(((........................((((...)))).............))).........	0.50833
712	831	37	-27.1	-0.45	0.25	24.53	CUGUCAUCACAAAAAAGGUGAGGCACGGCGAUCUAGAAGAGCCGUGACGCUCCCUUCUCACUCUACAAGGAAGUUGCAAACGCGGUCGCAGACCUGGUUAGAAUCAAGAGAAUACACGAA	...............(((.((((((((((...........)))))).).))))))((((..(((((.(((...((((..........)))).))).).)))).....)))).........	...............(((.((((((((((...........)))))).).))))))((((........................((((...)))).............)))).........	0.5
713	832	37	-27.1	-0.38	0.33	23.77	UGUCAUCACAAAAAAGGUGAGGCACGGCGAUCUAGAAGAGCCGUGACGCUCCCUUCUCACUCUACAAGGAAGUUGCAAACGCGGUCGCAGACCUGGUUAGAAUCAAGAGAAUACACGAAG	..............(((.((((((((((...........)))))).).))))))((((..(((((.(((...((((..........)))).))).).)))).....))))..........	..............(((.((((((((((...........)))))).).))))))((((........................((((...)))).............))))..........	0.5
714	833	37	-27.1	-0.16	0.35	22.75	GUCAUCACAAAAAAGGUGAGGCACGGCGAUCUAGAAGAGCCGUGACGCUCCCUUCUCACUCUACAAGGAAGUUGCAAACGCGGUCGCAGACCUGGUUAGAAUCAAGAGAAUACACGAAGC	.............(((.((((((((((...........)))))).).))))))((((..(((((.(((...((((..........)))).))).).)))).....))))...........	.............(((.((((((((((...........)))))).).))))))((((........................((((...)))).............))))...........	0.50833
715	834	37	-27.1	-0.39	0.33	24.05	UCAUCACAAAAAAGGUGAGGCACGGCGAUCUAGAAGAGCCGUGACGCUCCCUUCUCACUCUACAAGGAAGUUGCAAACGCGGUCGCAGACCUGGUUAGAAUCAAGAGAAUACACGAAGCA	............(((.((((((((((...........)))))).).))))))((((..(((((.(((...((((..........)))).))).).)))).....))))............	............(((.((((((((((...........)))))).).))))))((((........................((((...)))).............))))............	0.5
716	835	37	-27.1	-0.5	0.27	21.38	CAUCACAAAAAAGGUGAGGCACGGCGAUCUAGAAGAGCCGUGACGCUCCCUUCUCACUCUACAAGGAAGUUGCAAACGCGGUCGCAGACCUGGUUAGAAUCAAGAGAAUACACGAAGCAC	...........(((.((((((((((...........)))))).).))))))((((..(((((.(((...((((..........)))).))).).)))).....)))).............	...........(((.((((((((((...........)))))).).))))))((((........................((((...)))).............)))).............	0.50833
717	836	37	-27.1	-0.48	0.29	21.15	AUCACAAAAAAGGUGAGGCACGGCGAUCUAGAAGAGCCGUGACGCUCCCUUCUCACUCUACAAGGAAGUUGCAAACGCGGUCGCAGACCUGGUUAGAAUCAAGAGAAUACACGAAGCACU	..........(((.((((((((((...........)))))).).))))))((((..(((((.(((...((((..........)))).))).).)))).....))))..............	..........(((.((((((((((...........)))))).).))))))((((........................((((...)))).............))))..............	0.5
718	837	37	-27.1	-0.49	0.32	21.55	UCACAAAAAAGGUGAGGCACGGCGAUCUAGAAGAGCCGUGACGCUCCCUUCUCACUCUACAAGGAAGUUGCAAACGCGGUCGCAGACCUGGUUAGAAUCAAGAGAAUACACGAAGCACUU	.........(((.((((((((((...........)))))).).))))))((((..(((((.(((...((((..........)))).))).).)))).....))))...............	.........(((.((((((((((...........)))))).).))))))((((........................((((...)))).............))))...............	0.5
719	838	37	-27.1	-0.12	0.4	22.57	CACAAAAAAGGUGAGGCACGGCGAUCUAGAAGAGCCGUGACGCUCCCUUCUCACUCUACAAGGAAGUUGCAAACGCGGUCGCAGACCUGGUUAGAAUCAAGAGAAUACACGAAGCACUUG	........(((.((((((((((...........)))))).).))))))((((..(((((.(((...((((..........)))).))).).)))).....))))................	........(((.((((((((((...........)))))).).))))))((((........................((((...)))).............))))................	0.50833
720	839	37	-27.2	-0.32	0.33	24.34	ACAAAAAAGGUGAGGCACGGCGAUCUAGAAGAGCCGUGACGCUCCCUUCUCACUCUACAAGGAAGUUGCAAACGCGGUCGCAGACCUGGUUAGAAUCAAGAGAAUACACGAAGCACUUGA	......((((.((((((((((...........)))))).).))))))).....(((((.(((...((((..........)))).))).).)))).(((((...............)))))	......((((.((((((((((...........)))))).).)))))))...........................((((...))))..................................	0.5
721	840	37	-28.3	-0.54	0.27	21.06	CAAAAAAGGUGAGGCACGGCGAUCUAGAAGAGCCGUGACGCUCCCUUCUCACUCUACAAGGAAGUUGCAAACGCGGUCGCAGACCUGGUUAGAAUCAAGAGAAUACACGAAGCACUUGAU	.....((((.((((((((((...........)))))).).))))))).....(((((.(((...((((..........)))).))).).))))((((((...............))))))	.....((((.((((((((((...........)))))).).)))))))......((....((......................)).....)).((((((...............))))))	0.5
722	841	37	-28.7	-0.81	0.2	19.96	AAAAAAGGUGAGGCACGGCGAUCUAGAAGAGCCGUGACGCUCCCUUCUCACUCUACAAGGAAGUUGCAAACGCGGUCGCAGACCUGGUUAGAAUCAAGAGAAUACACGAAGCACUUGAUC	....((((.((((((((((...........)))))).).))))))).....(((((.(((...((((..........)))).))).).))))((((((...............)))))).	....((((.((((((((((...........)))))).).)))))))......((....((......................)).....)).((((((...............)))))).	0.5
723	842	37	-28.7	-0.83	0.23	19.94	AAAAAGGUGAGGCACGGCGAUCUAGAAGAGCCGUGACGCUCCCUUCUCACUCUACAAGGAAGUUGCAAACGCGGUCGCAGACCUGGUUAGAAUCAAGAGAAUACACGAAGCACUUGAUCA	...((((.((((((((((...........)))))).).))))))).....(((((.(((...((((..........)))).))).).))))((((((...............))))))..	...((((.((((((((((...........)))))).).))))))).......................((..((((...))))..))....((((((...............))))))..	0.5
724	843	37	-28.7	-0.76	0.21	19.96	AAAAGGUGAGGCACGGCGAUCUAGAAGAGCCGUGACGCUCCCUUCUCACUCUACAAGGAAGUUGCAAACGCGGUCGCAGACCUGGUUAGAAUCAAGAGAAUACACGAAGCACUUGAUCAA	..((((.((((((((((...........)))))).).))))))).....(((((.(((...((((..........)))).))).).))))((((((...............))))))...	..((((.((((((((((...........)))))).).))))))).......................((..((((...))))..))....((((((...............))))))...	0.5
725	844	37	-28.7	-0.45	0.29	20.06	AAAGGUGAGGCACGGCGAUCUAGAAGAGCCGUGACGCUCCCUUCUCACUCUACAAGGAAGUUGCAAACGCGGUCGCAGACCUGGUUAGAAUCAAGAGAAUACACGAAGCACUUGAUCAAG	.((((.((((((((((...........)))))).).))))))).....(((((.(((...((((..........)))).))).).))))((((((...............))))))....	.((((.((((((((((...........)))))).).))))))).......................((..((((...))))..))....((((((...............))))))....	0.50833
726	845	37	-28.1	0.1	0.47	22.12	AAGGUGAGGCACGGCGAUCUAGAAGAGCCGUGACGCUCCCUUCUCACUCUACAAGGAAGUUGCAAACGCGGUCGCAGACCUGGUUAGAAUCAAGAGAAUACACGAAGCACUUGAUCAAGG	((((.((((((((((...........)))))).).))))))).....(((((.(((...((((..........)))).))).).))))((((((...............)))))).....	.(((.((((((((((...........)))))).).))))))........................((..((((...))))..))....((((((...............)))))).....	0.51667
727	846	37	-27.2	0.45	0.66	28.02	AGGUGAGGCACGGCGAUCUAGAAGAGCCGUGACGCUCCCUUCUCACUCUACAAGGAAGUUGCAAACGCGGUCGCAGACCUGGUUAGAAUCAAGAGAAUACACGAAGCACUUGAUCAAGGU	(((.((((((((((...........)))))).).))))))......(((((.(((...((((..........)))).))).).))))((((((...............))))))......	(((.((((((((((...........)))))).).))))))............................((((...))))..........(((.................)))........	0.51667
728	847	37	-27.5	0.61	0.72	28.38	GGUGAGGCACGGCGAUCUAGAAGAGCCGUGACGCUCCCUUCUCACUCUACAAGGAAGUUGCAAACGCGGUCGCAGACCUGGUUAGAAUCAAGAGAAUACACGAAGCACUUGAUCAAGGUU	((.((((((((((...........)))))).).)))))(((((..(((((.(((...((((..........)))).))).).)))).....)))))..........((((.....)))).	((.((((((((((...........)))))).).)))))(((((........................((((...)))).............)))))........................	0.51667
729	848	37	-25.3	1.28	0.91	35.16	GUGAGGCACGGCGAUCUAGAAGAGCCGUGACGCUCCCUUCUCACUCUACAAGGAAGUUGCAAACGCGGUCGCAGACCUGGUUAGAAUCAAGAGAAUACACGAAGCACUUGAUCAAGGUUG	((((((((((((...........)))))).........))))))(((((.(((...((((..........)))).))).).))))((((((...............))))))........	..((((((((((...........)))))).).)))...............................((((...)))).........(((((...............))))).........	0.51667
730	849	37	-25	1.15	0.91	29.81	UGAGGCACGGCGAUCUAGAAGAGCCGUGACGCUCCCUUCUCACUCUACAAGGAAGUUGCAAACGCGGUCGCAGACCUGGUUAGAAUCAAGAGAAUACACGAAGCACUUGAUCAAGGUUGA	.((((((((((...........)))))).).))).(((((..........))))).....(((..((((...))))..)))...((((((...............)))))).........	.((((((((((...........)))))).).)))...........................((..((((...))))..)).....(((((...............)))))..........	0.50833
731	850	37	-25	0.7	0.7	29.88	GAGGCACGGCGAUCUAGAAGAGCCGUGACGCUCCCUUCUCACUCUACAAGGAAGUUGCAAACGCGGUCGCAGACCUGGUUAGAAUCAAGAGAAUACACGAAGCACUUGAUCAAGGUUGAA	((((((((((...........)))))).).))).(((((..........))))).....(((..((((...))))..)))...((((((...............))))))..........	((((((((((...........)))))).).)))...........................((..((((...))))..)).....(((((...............)))))...........	0.50833
732	851	37	-23.5	0.87	0.76	31.7	AGGCACGGCGAUCUAGAAGAGCCGUGACGCUCCCUUCUCACUCUACAAGGAAGUUGCAAACGCGGUCGCAGACCUGGUUAGAAUCAAGAGAAUACACGAAGCACUUGAUCAAGGUUGAAA	...((((((...........))))))..((...(((((..........)))))..)).(((..((((...))))..)))...((((((...............))))))...........	...((((((...........))))))................................(((..((((...))))..)))....(((((...............)))))............	0.5
733	852	37	-23.5	0.91	0.81	31.4	GGCACGGCGAUCUAGAAGAGCCGUGACGCUCCCUUCUCACUCUACAAGGAAGUUGCAAACGCGGUCGCAGACCUGGUUAGAAUCAAGAGAAUACACGAAGCACUUGAUCAAGGUUGAAAA	..((((((...........))))))..((...(((((..........)))))..)).(((..((((...))))..)))...((((((...............))))))............	..((((((...........))))))................................(((..((((...))))..)))....(((((...............))))).............	0.5
734	853	37	-23.5	0.92	0.79	31.37	GCACGGCGAUCUAGAAGAGCCGUGACGCUCCCUUCUCACUCUACAAGGAAGUUGCAAACGCGGUCGCAGACCUGGUUAGAAUCAAGAGAAUACACGAAGCACUUGAUCAAGGUUGAAAAC	.((((((...........))))))..((...(((((..........)))))..)).(((..((((...))))..)))...((((((...............)))))).............	.((((((...........))))))................................(((..((((...))))..)))....(((((...............)))))..............	0.5
735	854	37	-23.3	0.71	0.75	32.48	CACGGCGAUCUAGAAGAGCCGUGACGCUCCCUUCUCACUCUACAAGGAAGUUGCAAACGCGGUCGCAGACCUGGUUAGAAUCAAGAGAAUACACGAAGCACUUGAUCAAGGUUGAAAACU	((((((...........))))))..((...(((((..........)))))..)).(((..((((...))))..)))...((((((...............))))))..............	((((((...........)))))).................................((..((((...))))..)).....(((((...............)))))...............	0.49167
736	855	37	-21.9	1.16	0.87	37.54	ACGGCGAUCUAGAAGAGCCGUGACGCUCCCUUCUCACUCUACAAGGAAGUUGCAAACGCGGUCGCAGACCUGGUUAGAAUCAAGAGAAUACACGAAGCACUUGAUCAAGGUUGAAAACUG	...((((((.....((((......)))).(((((..........)))))..((....)))))))).(((((((((((.......................)))))).)))))........	...((((((.....((((......)))).......................((....)))))))).((((.........(((((...............)))))....))))........	0.49167
737	856	37	-21.9	1.53	0.93	36.33	CGGCGAUCUAGAAGAGCCGUGACGCUCCCUUCUCACUCUACAAGGAAGUUGCAAACGCGGUCGCAGACCUGGUUAGAAUCAAGAGAAUACACGAAGCACUUGAUCAAGGUUGAAAACUGG	..((((((.....((((......)))).(((((..........)))))..((....)))))))).(((((((((((.......................)))))).))))).........	..((((((.....((((......)))).......................((....)))))))).((((..........((((...............)))).....)))).........	0.5
738	857	37	-21.9	1.3	0.88	35.87	GGCGAUCUAGAAGAGCCGUGACGCUCCCUUCUCACUCUACAAGGAAGUUGCAAACGCGGUCGCAGACCUGGUUAGAAUCAAGAGAAUACACGAAGCACUUGAUCAAGGUUGAAAACUGGA	.((((((.....((((......)))).(((((..........)))))..((....)))))))).(((((((((((.......................)))))).)))))..........	.((((((.....((((......)))).......................((....)))))))).((((..........((((...............)))).....))))..........	0.49167
739	858	37	-22.2	1.08	0.86	39.05	GCGAUCUAGAAGAGCCGUGACGCUCCCUUCUCACUCUACAAGGAAGUUGCAAACGCGGUCGCAGACCUGGUUAGAAUCAAGAGAAUACACGAAGCACUUGAUCAAGGUUGAAAACUGGAU	((((((.....((((......)))).(((((..........)))))..((....)))))))).(((((((((((.......................)))))).)))))...........	............(((......))).......................................((((.........(((((...............)))))....))))...........	0.48333
740	859	37	-22.6	0.55	0.7	33.25	CGAUCUAGAAGAGCCGUGACGCUCCCUUCUCACUCUACAAGGAAGUUGCAAACGCGGUCGCAGACCUGGUUAGAAUCAAGAGAAUACACGAAGCACUUGAUCAAGGUUGAAAACUGGAUA	..((((((...(((((((((..(((...............))).))))).(((..((((...))))..)))...((((((...............))))))...)))).....)))))).	..((((((...........................................((..((((...))))..)).....(((((...............))))).............)))))).	0.475
741	860	37	-22.6	0.6	0.7	32.29	GAUCUAGAAGAGCCGUGACGCUCCCUUCUCACUCUACAAGGAAGUUGCAAACGCGGUCGCAGACCUGGUUAGAAUCAAGAGAAUACACGAAGCACUUGAUCAAGGUUGAAAACUGGAUAU	.((((((...(((((((((..(((...............))).))))).(((..((((...))))..)))...((((((...............))))))...)))).....))))))..	.((((((...........................................((..((((...))))..)).....(((((...............))))).............))))))..	0.46667
742	861	37	-22.2	0.64	0.73	32.27	AUCUAGAAGAGCCGUGACGCUCCCUUCUCACUCUACAAGGAAGUUGCAAACGCGGUCGCAGACCUGGUUAGAAUCAAGAGAAUACACGAAGCACUUGAUCAAGGUUGAAAACUGGAUAUU	((((((...(((((((((..(((...............))).))))).(((..((((...))))..)))...((((((...............))))))...)))).....))))))...	((((((...........................................((..((((...))))..)).....(((((...............))))).............))))))...	0.45833
743	862	37	-21	1.35	0.9	32.94	UCUAGAAGAGCCGUGACGCUCCCUUCUCACUCUACAAGGAAGUUGCAAACGCGGUCGCAGACCUGGUUAGAAUCAAGAGAAUACACGAAGCACUUGAUCAAGGUUGAAAACUGGAUAUUC	(((((...(((((((((..(((...............))).))))).(((..((((...))))..)))...((((((...............))))))...)))).....))))).....	(((((............................................(..((((...))))..)......(((((...............))))).............))))).....	0.46667
744	863	37	-19.6	1.32	0.9	38.92	CUAGAAGAGCCGUGACGCUCCCUUCUCACUCUACAAGGAAGUUGCAAACGCGGUCGCAGACCUGGUUAGAAUCAAGAGAAUACACGAAGCACUUGAUCAAGGUUGAAAACUGGAUAUUCA	((((...(((((((((..(((...............))).))))).(((..((((...))))..)))...((((((...............))))))...)))).....)))).......	((((...............................................((((...)))).........(((((...............))))).............)))).......	0.46667
745	864	37	-19.2	1.59	0.98	35.77	UAGAAGAGCCGUGACGCUCCCUUCUCACUCUACAAGGAAGUUGCAAACGCGGUCGCAGACCUGGUUAGAAUCAAGAGAAUACACGAAGCACUUGAUCAAGGUUGAAAACUGGAUAUUCAG	.......((((((..((...(((((..........)))))..))...))))))....(((((((((((.......................)))))).))))).....((((....))))	........(((((..((...((((............))))..))...)))))......(((..........(((.................))).....)))......(((......)))	0.46667
746	865	37	-20.3	1.25	0.89	31.73	AGAAGAGCCGUGACGCUCCCUUCUCACUCUACAAGGAAGUUGCAAACGCGGUCGCAGACCUGGUUAGAAUCAAGAGAAUACACGAAGCACUUGAUCAAGGUUGAAAACUGGAUAUUCAGG	......((((((..((...(((((..........)))))..))...))))))....(((((((((((.......................)))))).))))).....((((....)))).	.......(((((..((...(((((..........)))))..))...)))))......(((.(.................................)..)))......((((....)))).	0.475
747	866	37	-20.3	1.34	0.92	34.75	GAAGAGCCGUGACGCUCCCUUCUCACUCUACAAGGAAGUUGCAAACGCGGUCGCAGACCUGGUUAGAAUCAAGAGAAUACACGAAGCACUUGAUCAAGGUUGAAAACUGGAUAUUCAGGA	.....((((((..((...(((((..........)))))..))...))))))....(((((((((((.......................)))))).))))).....((((....))))..	......(((((..((...(((((..........)))))..))...)))))......(((......................................)))......(((......)))..	0.475
748	867	37	-20.3	1.06	0.84	33.68	AAGAGCCGUGACGCUCCCUUCUCACUCUACAAGGAAGUUGCAAACGCGGUCGCAGACCUGGUUAGAAUCAAGAGAAUACACGAAGCACUUGAUCAAGGUUGAAAACUGGAUAUUCAGGAA	....((((((..((...(((((..........)))))..))...))))))....(((((((((((.......................)))))).))))).....((((....))))...	.....(((((..((...(((((..........)))))..))...)))))......(((......................................)))......(((......)))...	0.46667
749	868	37	-20.3	1.25	0.94	33.62	AGAGCCGUGACGCUCCCUUCUCACUCUACAAGGAAGUUGCAAACGCGGUCGCAGACCUGGUUAGAAUCAAGAGAAUACACGAAGCACUUGAUCAAGGUUGAAAACUGGAUAUUCAGGAAC	...((((((..((...(((((..........)))))..))...))))))....(((((((((((.......................)))))).))))).....((((....))))....	....(((((..((...(((((..........)))))..))...)))))......(((......................................)))......(((......)))....	0.475
750	869	37	-20.3	1.48	0.93	31.85	GAGCCGUGACGCUCCCUUCUCACUCUACAAGGAAGUUGCAAACGCGGUCGCAGACCUGGUUAGAAUCAAGAGAAUACACGAAGCACUUGAUCAAGGUUGAAAACUGGAUAUUCAGGAACC	..((((((..((...(((((..........)))))..))...))))))....(((((((((((.......................)))))).))))).....((((....)))).....	...(((((..((...(((((..........)))))..))...)))))......(((......................................)))......(((......))).....	0.48333
751	870	37	-20.3	1.23	0.89	30.9	AGCCGUGACGCUCCCUUCUCACUCUACAAGGAAGUUGCAAACGCGGUCGCAGACCUGGUUAGAAUCAAGAGAAUACACGAAGCACUUGAUCAAGGUUGAAAACUGGAUAUUCAGGAACCC	.((((((..((...(((((..........)))))..))...))))))....(((((((((((.......................)))))).))))).....((((....))))......	.((((((..((...(((((..........)))))..))...)))))).....(((......................................)))......(((......)))......	0.48333
752	871	37	-19.7	1.49	0.93	35.73	GCCGUGACGCUCCCUUCUCACUCUACAAGGAAGUUGCAAACGCGGUCGCAGACCUGGUUAGAAUCAAGAGAAUACACGAAGCACUUGAUCAAGGUUGAAAACUGGAUAUUCAGGAACCCC	((((((..((...(((((..........)))))..))...))))))....(((((((((((.......................)))))).))))).....((((....)))).......	.(((((..((...(((((..........)))))..))...)))))......(((......................................)))......(((......))).......	0.49167
753	872	37	-18.4	2.05	0.98	42.12	CCGUGACGCUCCCUUCUCACUCUACAAGGAAGUUGCAAACGCGGUCGCAGACCUGGUUAGAAUCAAGAGAAUACACGAAGCACUUGAUCAAGGUUGAAAACUGGAUAUUCAGGAACCCCG	.(((((..(((.(((((..........)))))..((....))((((...))))((((....)))).)))..).)))).....(((((((.((........)).))...))))).......	....................................................................................................(((......)))........	0.49167
754	873	37	-18	2.36	0.99	42.14	CGUGACGCUCCCUUCUCACUCUACAAGGAAGUUGCAAACGCGGUCGCAGACCUGGUUAGAAUCAAGAGAAUACACGAAGCACUUGAUCAAGGUUGAAAACUGGAUAUUCAGGAACCCCGG	(((((..(((.(((((..........)))))..((....))((((...))))((((....)))).)))..).)))).....(((((((.((........)).))...)))))........	...........((............))........................................................................(((......))).........	0.49167
755	874	37	-20.7	1.75	0.93	21	GUGACGCUCCCUUCUCACUCUACAAGGAAGUUGCAAACGCGGUCGCAGACCUGGUUAGAAUCAAGAGAAUACACGAAGCACUUGAUCAAGGUUGAAAACUGGAUAUUCAGGAACCCCGGG	((((((((.((((..........)))).)))(((....))))))))...(((((.....((((((...............))))))...((((.....((((....)))).)))))))))	((((((((.((((..........)))).))).((....)).)))))...(((((...(.((((((...............)))))))..(((......(((......)))..))))))))	0.49167
756	875	37	-18.2	2.35	0.99	33.18	UGACGCUCCCUUCUCACUCUACAAGGAAGUUGCAAACGCGGUCGCAGACCUGGUUAGAAUCAAGAGAAUACACGAAGCACUUGAUCAAGGUUGAAAACUGGAUAUUCAGGAACCCCGGGU	.((((((.((((..........)))).)))(((....))))))....((((((.....((((((...............))))))...((((.....((((....)))).))))))))))	....(((.(((............))).))).................((((((.....((((((...............))))))...(((......(((......)))..)))))))))	0.48333
757	876	37	-19.6	1.79	0.96	26.17	GACGCUCCCUUCUCACUCUACAAGGAAGUUGCAAACGCGGUCGCAGACCUGGUUAGAAUCAAGAGAAUACACGAAGCACUUGAUCAAGGUUGAAAACUGGAUAUUCAGGAACCCCGGGUU	((((((.((((..........)))).)))(((....))))))...(((((((.....((((((...............))))))...((((.....((((....)))).)))))))))))	((((((.((((..........)))).))).((....)).)))...(((((((...(.((((((...............)))))))..(((......((((....))))..))))))))))	0.48333
758	877	37	-18.9	1.81	0.96	31.22	ACGCUCCCUUCUCACUCUACAAGGAAGUUGCAAACGCGGUCGCAGACCUGGUUAGAAUCAAGAGAAUACACGAAGCACUUGAUCAAGGUUGAAAACUGGAUAUUCAGGAACCCCGGGUUU	..(((.((((..........)))).)))(((....))).....((((((((.....((((((...............))))))...((((.....((((....)))).))))))))))))	............................................(((((((.....((((((...............))))))...(((......((((....))))..)))))))))).	0.475
759	878	37	-21.4	1.52	0.93	26.48	CGCUCCCUUCUCACUCUACAAGGAAGUUGCAAACGCGGUCGCAGACCUGGUUAGAAUCAAGAGAAUACACGAAGCACUUGAUCAAGGUUGAAAACUGGAUAUUCAGGAACCCCGGGUUUG	.(((.((((..........)))).)))(((....)))....(((((((((.....((((((...............))))))...((((.....((((....)))).)))))))))))))	.(((.((((..........)))).))).((....)).....(((((((((.....((((((...............))))))...(((......((((....))))..))))))))))))	0.48333
760	879	37	-24.4	0.49	0.68	22.92	GCUCCCUUCUCACUCUACAAGGAAGUUGCAAACGCGGUCGCAGACCUGGUUAGAAUCAAGAGAAUACACGAAGCACUUGAUCAAGGUUGAAAACUGGAUAUUCAGGAACCCCGGGUUUGC	(((.((((..........)))).)))(((....)))...((((((((((.....((((((...............))))))...((((.....((((....)))).))))))))))))))	.((.((((..........)))).))..((....))....((((((((((...(.((((((...............)))))))..(((......((((....))))..)))))))))))))	0.48333
761	880	37	-26	0.16	0.56	18.08	CUCCCUUCUCACUCUACAAGGAAGUUGCAAACGCGGUCGCAGACCUGGUUAGAAUCAAGAGAAUACACGAAGCACUUGAUCAAGGUUGAAAACUGGAUAUUCAGGAACCCCGGGUUUGCG	....(((((..........)))))((((....)))).(((((((((((.....((((((...............))))))...((((.....((((....)))).)))))))))))))))	....((((............)))).(((....)))..(((((((((((...(.((((((...............)))))))..(((......((((....))))..))))))))))))))	0.48333
762	881	37	-26.4	0.14	0.47	16.45	UCCCUUCUCACUCUACAAGGAAGUUGCAAACGCGGUCGCAGACCUGGUUAGAAUCAAGAGAAUACACGAAGCACUUGAUCAAGGUUGAAAACUGGAUAUUCAGGAACCCCGGGUUUGCGC	...(((((..........)))))((((....)))).(((((((((((.....((((((...............))))))...((((.....((((....)))).))))))))))))))).	...(((((..........))))).(((....)))..(((((((((((...(.((((((...............)))))))..(((......((((....))))..)))))))))))))).	0.48333
763	882	37	-26.9	-0.2	0.34	16.34	CCCUUCUCACUCUACAAGGAAGUUGCAAACGCGGUCGCAGACCUGGUUAGAAUCAAGAGAAUACACGAAGCACUUGAUCAAGGUUGAAAACUGGAUAUUCAGGAACCCCGGGUUUGCGCU	..(((((..........)))))..((....))((.(((((((((((.....((((((...............))))))...((((.....((((....)))).)))))))))))))))))	..(((((..........)))))..((....)).(.(((((((((((...(.((((((...............)))))))..(((......((((....))))..))))))))))))))).	0.48333
764	883	37	-27.4	-0.26	0.36	15.35	CCUUCUCACUCUACAAGGAAGUUGCAAACGCGGUCGCAGACCUGGUUAGAAUCAAGAGAAUACACGAAGCACUUGAUCAAGGUUGAAAACUGGAUAUUCAGGAACCCCGGGUUUGCGCUA	.(((((..........)))))..((....))((.(((((((((((.....((((((...............))))))...((((.....((((....)))).))))))))))))))))).	.(((((..........)))))..((....))((.(((((((((((...(.((((((...............)))))))..(((......((((....))))..)))))))))))))))).	0.475
765	884	37	-27	-0.07	0.41	14.62	CUUCUCACUCUACAAGGAAGUUGCAAACGCGGUCGCAGACCUGGUUAGAAUCAAGAGAAUACACGAAGCACUUGAUCAAGGUUGAAAACUGGAUAUUCAGGAACCCCGGGUUUGCGCUAG	(((((..........)))))..((....))((.(((((((((((.....((((((...............))))))...((((.....((((....)))).)))))))))))))))))..	(((((..........)))))..((....))((.(((((((((((...(.((((((...............)))))))..(((......((((....))))..))))))))))))))))..	0.475
766	885	37	-25.2	0.06	0.52	17.83	UUCUCACUCUACAAGGAAGUUGCAAACGCGGUCGCAGACCUGGUUAGAAUCAAGAGAAUACACGAAGCACUUGAUCAAGGUUGAAAACUGGAUAUUCAGGAACCCCGGGUUUGCGCUAGU	.....................((....))((.(((((((((((.....((((((...............))))))...((((.....((((....)))).)))))))))))))))))...	........(......).....((....))((.(((((((((((...(.((((((...............)))))))..(((......((((....))))..))))))))))))))))...	0.46667
767	886	37	-26.1	0.47	0.63	16.57	UCUCACUCUACAAGGAAGUUGCAAACGCGGUCGCAGACCUGGUUAGAAUCAAGAGAAUACACGAAGCACUUGAUCAAGGUUGAAAACUGGAUAUUCAGGAACCCCGGGUUUGCGCUAGUG	.........................(((((.(((((((((((.....((((((...............))))))...((((.....((((....)))).))))))))))))))))).)))	.......((....))..........(((((.(((((((((((...(.((((((...............)))))))..(((......((((....))))..)))))))))))))))).)))	0.475
768	887	37	-27.2	-0.05	0.48	17.07	CUCACUCUACAAGGAAGUUGCAAACGCGGUCGCAGACCUGGUUAGAAUCAAGAGAAUACACGAAGCACUUGAUCAAGGUUGAAAACUGGAUAUUCAGGAACCCCGGGUUUGCGCUAGUGG	........................(((((.(((((((((((.....((((((...............))))))...((((.....((((....)))).))))))))))))))))).))).	......(......)..........(((((.(((((((((((...(.((((((...............)))))))..(((......((((....))))..)))))))))))))))).))).	0.48333
769	888	37	-27.2	0	0.49	17.84	UCACUCUACAAGGAAGUUGCAAACGCGGUCGCAGACCUGGUUAGAAUCAAGAGAAUACACGAAGCACUUGAUCAAGGUUGAAAACUGGAUAUUCAGGAACCCCGGGUUUGCGCUAGUGGC	.......................(((((.(((((((((((.....((((((...............))))))...((((.....((((....)))).))))))))))))))))).)))..	.....((....))..........(((((.(((((((((((...(.((((((...............)))))))..(((......((((....))))..)))))))))))))))).)))..	0.48333
770	889	37	-27.2	0.08	0.52	16.52	CACUCUACAAGGAAGUUGCAAACGCGGUCGCAGACCUGGUUAGAAUCAAGAGAAUACACGAAGCACUUGAUCAAGGUUGAAAACUGGAUAUUCAGGAACCCCGGGUUUGCGCUAGUGGCC	......................(((((.(((((((((((.....((((((...............))))))...((((.....((((....)))).))))))))))))))))).)))...	....((....))..........(((((.(((((((((((...(.((((((...............)))))))..(((......((((....))))..)))))))))))))))).)))...	0.49167
771	890	37	-27.2	0.06	0.55	16.46	ACUCUACAAGGAAGUUGCAAACGCGGUCGCAGACCUGGUUAGAAUCAAGAGAAUACACGAAGCACUUGAUCAAGGUUGAAAACUGGAUAUUCAGGAACCCCGGGUUUGCGCUAGUGGCCG	.....................(((((.(((((((((((.....((((((...............))))))...((((.....((((....)))).))))))))))))))))).)))....	...(......)..........(((((.(((((((((((...(.((((((...............)))))))..(((......((((....))))..)))))))))))))))).)))....	0.49167
772	891	37	-28	0.15	0.48	17.11	CUCUACAAGGAAGUUGCAAACGCGGUCGCAGACCUGGUUAGAAUCAAGAGAAUACACGAAGCACUUGAUCAAGGUUGAAAACUGGAUAUUCAGGAACCCCGGGUUUGCGCUAGUGGCCGU	.....................((((((((((((((((.....((((((...............))))))...((((.....((((....)))).)))))))))))))))......)))))	.....................((((((((((((((((...(.((((((...............)))))))..(((......((((....))))..))))))))))))))......)))))	0.49167
773	892	37	-28.3	-0.02	0.43	16.42	UCUACAAGGAAGUUGCAAACGCGGUCGCAGACCUGGUUAGAAUCAAGAGAAUACACGAAGCACUUGAUCAAGGUUGAAAACUGGAUAUUCAGGAACCCCGGGUUUGCGCUAGUGGCCGUU	....................((((((((((((((((.....((((((...............))))))...((((.....((((....)))).)))))))))))))))......))))).	....................((((((((((((((((...(.((((((...............)))))))..(((......((((....))))..))))))))))))))......))))).	0.48333
774	893	37	-28.3	0.04	0.47	16.74	CUACAAGGAAGUUGCAAACGCGGUCGCAGACCUGGUUAGAAUCAAGAGAAUACACGAAGCACUUGAUCAAGGUUGAAAACUGGAUAUUCAGGAACCCCGGGUUUGCGCUAGUGGCCGUUG	...................((((((((((((((((.....((((((...............))))))...((((.....((((....)))).)))))))))))))))......)))))..	...................((((((((((((((((...(.((((((...............)))))))..(((......((((....))))..))))))))))))))......)))))..	0.49167
775	894	37	-29.5	-0.18	0.39	15.98	UACAAGGAAGUUGCAAACGCGGUCGCAGACCUGGUUAGAAUCAAGAGAAUACACGAAGCACUUGAUCAAGGUUGAAAACUGGAUAUUCAGGAACCCCGGGUUUGCGCUAGUGGCCGUUGC	............(((...((((((((((((((((.....((((((...............))))))...((((.....((((....)))).)))))))))))))))......))))))))	............(((...((((((((((((((((...(.((((((...............)))))))..(((......((((....))))..))))))))))))))......))))))))	0.49167
776	895	37	-30.3	-0.39	0.34	15.53	ACAAGGAAGUUGCAAACGCGGUCGCAGACCUGGUUAGAAUCAAGAGAAUACACGAAGCACUUGAUCAAGGUUGAAAACUGGAUAUUCAGGAACCCCGGGUUUGCGCUAGUGGCCGUUGCC	...........(((...((((((((((((((((.....((((((...............))))))...((((.....((((....)))).)))))))))))))))......)))))))).	...........(((...((((((((((((((((...(.((((((...............)))))))..(((......((((....))))..))))))))))))))......)))))))).	0.5
777	896	37	-30.3	-0.61	0.23	19.06	CAAGGAAGUUGCAAACGCGGUCGCAGACCUGGUUAGAAUCAAGAGAAUACACGAAGCACUUGAUCAAGGUUGAAAACUGGAUAUUCAGGAACCCCGGGUUUGCGCUAGUGGCCGUUGCCA	..........(((...((((((((((((((((.....((((((...............))))))...((((.....((((....)))).)))))))))))))))......))))))))..	..........(((........(((((((((((...(.((((((...............)))))))..(((......((((....))))..))))))))))))))...........)))..	0.5
778	897	37	-30.4	-0.51	0.3	21.31	AAGGAAGUUGCAAACGCGGUCGCAGACCUGGUUAGAAUCAAGAGAAUACACGAAGCACUUGAUCAAGGUUGAAAACUGGAUAUUCAGGAACCCCGGGUUUGCGCUAGUGGCCGUUGCCAU	.........((....))((.(((((((((((.....((((((...............))))))...((((.....((((....)))).))))))))))))))))).(((((....)))))	....................(((((((((((...(.((((((...............)))))))..(((......((((....))))..)))))))))))))).................	0.49167
779	898	37	-30.9	-0.38	0.34	21.16	AGGAAGUUGCAAACGCGGUCGCAGACCUGGUUAGAAUCAAGAGAAUACACGAAGCACUUGAUCAAGGUUGAAAACUGGAUAUUCAGGAACCCCGGGUUUGCGCUAGUGGCCGUUGCCAUU	........((....))((.(((((((((((.....((((((...............))))))...((((.....((((....)))).)))))))))))))))))((((((....))))))	.................(.(((((((((((...(.((((((...............)))))))..(((......((((....))))..)))))))))))))))..(((((....))))).	0.49167
780	899	37	-31.5	-0.35	0.27	20.22	GGAAGUUGCAAACGCGGUCGCAGACCUGGUUAGAAUCAAGAGAAUACACGAAGCACUUGAUCAAGGUUGAAAACUGGAUAUUCAGGAACCCCGGGUUUGCGCUAGUGGCCGUUGCCAUUG	.......((....))((.(((((((((((.....((((((...............))))))...((((.....((((....)))).)))))))))))))))))((((((....)))))).	.......((....))...(((((((((((...(.((((((...............)))))))..(((......((((....))))..))))))))))))))..((((((....)))))).	0.5
781	900	37	-31.5	-0.36	0.34	19.28	GAAGUUGCAAACGCGGUCGCAGACCUGGUUAGAAUCAAGAGAAUACACGAAGCACUUGAUCAAGGUUGAAAACUGGAUAUUCAGGAACCCCGGGUUUGCGCUAGUGGCCGUUGCCAUUGC	......((....))((.(((((((((((.....((((((...............))))))...((((.....((((....)))).)))))))))))))))))((((((....))))))..	......((....))...(((((((((((...(.((((((...............)))))))..(((......((((....))))..))))))))))))))..((((((....))))))..	0.5
782	901	37	-31.6	-0.53	0.31	20.1	AAGUUGCAAACGCGGUCGCAGACCUGGUUAGAAUCAAGAGAAUACACGAAGCACUUGAUCAAGGUUGAAAACUGGAUAUUCAGGAACCCCGGGUUUGCGCUAGUGGCCGUUGCCAUUGCC	...((((....))))..((((((((((.....((((((...............))))))...((((.....((((....)))).))))))))))))))((.((((((....)))))))).	.....((....))...(((((((((((...(.((((((...............)))))))..(((......((((....))))..))))))))))))))..((((((....))))))...	0.5
783	902	37	-31.6	-0.25	0.39	19.33	AGUUGCAAACGCGGUCGCAGACCUGGUUAGAAUCAAGAGAAUACACGAAGCACUUGAUCAAGGUUGAAAACUGGAUAUUCAGGAACCCCGGGUUUGCGCUAGUGGCCGUUGCCAUUGCCU	..((((....))))..((((((((((.....((((((...............))))))...((((.....((((....)))).))))))))))))))((.((((((....))))))))..	....((....))...(((((((((((...(.((((((...............)))))))..(((......((((....))))..))))))))))))))..((((((....))))))....	0.5
784	903	37	-31.9	-0.16	0.38	18.02	GUUGCAAACGCGGUCGCAGACCUGGUUAGAAUCAAGAGAAUACACGAAGCACUUGAUCAAGGUUGAAAACUGGAUAUUCAGGAACCCCGGGUUUGCGCUAGUGGCCGUUGCCAUUGCCUG	(((((....)))).)((((((((((.....((((((...............))))))...((((.....((((....)))).))))))))))))))((.((((((....))))))))...	..(((....)))..(((((((((((...(.((((((...............)))))))..(((......((((....))))..))))))))))))))..((((((....)))))).....	0.50833
785	904	37	-31.6	0.01	0.45	18.42	UUGCAAACGCGGUCGCAGACCUGGUUAGAAUCAAGAGAAUACACGAAGCACUUGAUCAAGGUUGAAAACUGGAUAUUCAGGAACCCCGGGUUUGCGCUAGUGGCCGUUGCCAUUGCCUGG	((((....))))..((((((((((.....((((((...............))))))...((((.....((((....)))).))))))))))))))((.((((((....))))))))....	..((....))...(((((((((((...(.((((((...............)))))))..(((......((((....))))..))))))))))))))..((((((....))))))......	0.50833
786	905	37	-31.7	0.02	0.43	25.33	UGCAAACGCGGUCGCAGACCUGGUUAGAAUCAAGAGAAUACACGAAGCACUUGAUCAAGGUUGAAAACUGGAUAUUCAGGAACCCCGGGUUUGCGCUAGUGGCCGUUGCCAUUGCCUGGC	.......((((((((((((((((.....((((((...............))))))...((((.....((((....)))).)))))))))))))))......))))).((((.....))))	............(((((((((((...(.((((((...............)))))))..(((......((((....))))..))))))))))))))...(((((....)))))........	0.51667
787	906	37	-32.9	-0.3	0.31	28.27	GCAAACGCGGUCGCAGACCUGGUUAGAAUCAAGAGAAUACACGAAGCACUUGAUCAAGGUUGAAAACUGGAUAUUCAGGAACCCCGGGUUUGCGCUAGUGGCCGUUGCCAUUGCCUGGCU	......((((((((((((((((.....((((((...............))))))...((((.....((((....)))).)))))))))))))))......))))).((((.....)))).	...........(((((((((((...(.((((((...............)))))))..(((......((((....))))..))))))))))))))..........................	0.51667
788	907	37	-32.9	-0.63	0.27	19.45	CAAACGCGGUCGCAGACCUGGUUAGAAUCAAGAGAAUACACGAAGCACUUGAUCAAGGUUGAAAACUGGAUAUUCAGGAACCCCGGGUUUGCGCUAGUGGCCGUUGCCAUUGCCUGGCUU	.....((((((((((((((((.....((((((...............))))))...((((.....((((....)))).)))))))))))))))......))))).((((.....))))..	......(((((((((((((((...(.((((((...............)))))))..(((......((((....))))..))))))))))))))......))))..((((.....))))..	0.50833
789	908	37	-32.9	-0.63	0.24	19.56	AAACGCGGUCGCAGACCUGGUUAGAAUCAAGAGAAUACACGAAGCACUUGAUCAAGGUUGAAAACUGGAUAUUCAGGAACCCCGGGUUUGCGCUAGUGGCCGUUGCCAUUGCCUGGCUUU	....((((((((((((((((.....((((((...............))))))...((((.....((((....)))).)))))))))))))))......))))).((((.....))))...	.....(((((((((((((((...(.((((((...............)))))))..(((......((((....))))..))))))))))))))......))))..((((.....))))...	0.5
790	909	37	-32.9	-0.62	0.3	19.41	AACGCGGUCGCAGACCUGGUUAGAAUCAAGAGAAUACACGAAGCACUUGAUCAAGGUUGAAAACUGGAUAUUCAGGAACCCCGGGUUUGCGCUAGUGGCCGUUGCCAUUGCCUGGCUUUU	...((((((((((((((((.....((((((...............))))))...((((.....((((....)))).)))))))))))))))......))))).((((.....))))....	....(((((((((((((((...(.((((((...............)))))))..(((......((((....))))..))))))))))))))......))))..((((.....))))....	0.5
791	910	37	-32.9	-0.22	0.41	19.28	ACGCGGUCGCAGACCUGGUUAGAAUCAAGAGAAUACACGAAGCACUUGAUCAAGGUUGAAAACUGGAUAUUCAGGAACCCCGGGUUUGCGCUAGUGGCCGUUGCCAUUGCCUGGCUUUUG	..((((((((((((((((.....((((((...............))))))...((((.....((((....)))).)))))))))))))))......))))).((((.....)))).....	...(((((((((((((((...(.((((((...............)))))))..(((......((((....))))..))))))))))))))......))))..((((.....)))).....	0.50833
792	911	37	-32.9	-0.05	0.45	19.4	CGCGGUCGCAGACCUGGUUAGAAUCAAGAGAAUACACGAAGCACUUGAUCAAGGUUGAAAACUGGAUAUUCAGGAACCCCGGGUUUGCGCUAGUGGCCGUUGCCAUUGCCUGGCUUUUGG	.((((((((((((((((.....((((((...............))))))...((((.....((((....)))).)))))))))))))))......))))).((((.....))))......	......(((((((((((...(.((((((...............)))))))..(((......((((....))))..))))))))))))))............((((.....))))......	0.51667
793	912	37	-32.4	0.42	0.63	22.2	GCGGUCGCAGACCUGGUUAGAAUCAAGAGAAUACACGAAGCACUUGAUCAAGGUUGAAAACUGGAUAUUCAGGAACCCCGGGUUUGCGCUAGUGGCCGUUGCCAUUGCCUGGCUUUUGGG	((((((((((((((((.....((((((...............))))))...((((.....((((....)))).)))))))))))))))......))))).((((.....)))).......	.....(((((((((((...(.((((((...............)))))))..(((......((((....))))..))))))))))))))................................	0.51667
794	913	37	-32.2	0.05	0.5	19.41	CGGUCGCAGACCUGGUUAGAAUCAAGAGAAUACACGAAGCACUUGAUCAAGGUUGAAAACUGGAUAUUCAGGAACCCCGGGUUUGCGCUAGUGGCCGUUGCCAUUGCCUGGCUUUUGGGA	....(((((((((((.....((((((...............))))))...((((.....((((....)))).)))))))))))))))((((.(((((..((....)).))))).))))..	..(.(((((((((((...(.((((((...............)))))))..(((......((((....))))..))))))))))))))).((((((....))))))...............	0.50833
795	914	37	-32.2	-0.58	0.24	18.97	GGUCGCAGACCUGGUUAGAAUCAAGAGAAUACACGAAGCACUUGAUCAAGGUUGAAAACUGGAUAUUCAGGAACCCCGGGUUUGCGCUAGUGGCCGUUGCCAUUGCCUGGCUUUUGGGAA	...(((((((((((.....((((((...............))))))...((((.....((((....)))).)))))))))))))))((((.(((((..((....)).))))).))))...	.(.(((((((((((...(.((((((...............)))))))..(((......((((....))))..))))))))))))))).((((((....))))))................	0.5
796	915	37	-32.2	0.04	0.39	19.57	GUCGCAGACCUGGUUAGAAUCAAGAGAAUACACGAAGCACUUGAUCAAGGUUGAAAACUGGAUAUUCAGGAACCCCGGGUUUGCGCUAGUGGCCGUUGCCAUUGCCUGGCUUUUGGGAAG	..(((((((((((.....((((((...............))))))...((((.....((((....)))).)))))))))))))))((((.(((((..((....)).))))).))))....	..(((((((((((...(.((((((...............)))))))..(((......((((....))))..))))))))))))))..((((((....)))))).................	0.5
797	916	37	-32.2	-0.2	0.34	20.6	UCGCAGACCUGGUUAGAAUCAAGAGAAUACACGAAGCACUUGAUCAAGGUUGAAAACUGGAUAUUCAGGAACCCCGGGUUUGCGCUAGUGGCCGUUGCCAUUGCCUGGCUUUUGGGAAGC	.(((((((((((.....((((((...............))))))...((((.....((((....)))).)))))))))))))))((((.(((((..((....)).))))).)))).....	.(((((((((((...(.((((((...............)))))))..(((......((((....))))..))))))))))))))..((((((....))))))..................	0.5
798	917	37	-33.9	-0.69	0.22	13.67	CGCAGACCUGGUUAGAAUCAAGAGAAUACACGAAGCACUUGAUCAAGGUUGAAAACUGGAUAUUCAGGAACCCCGGGUUUGCGCUAGUGGCCGUUGCCAUUGCCUGGCUUUUGGGAAGCU	.((((((((((.....((((((...............))))))...((((.....((((....)))).))))))))))))))((.((((((....))))))))..((((((...))))))	.((((((((((...(.((((((...............)))))))..(((......((((....))))..)))))))))))))...((((((....))))))....((((((...))))))	0.5
799	918	37	-34.4	-0.88	0.17	10.24	GCAGACCUGGUUAGAAUCAAGAGAAUACACGAAGCACUUGAUCAAGGUUGAAAACUGGAUAUUCAGGAACCCCGGGUUUGCGCUAGUGGCCGUUGCCAUUGCCUGGCUUUUGGGAAGCUC	((((((((((.....((((((...............))))))...((((.....((((....)))).))))))))))))))((.((((((....))))))))..((((((...)))))).	((((((((((...(.((((((...............)))))))..(((......((((....))))..)))))))))))))((.((((((....))))))))..((((((...)))))).	0.5
800	919	37	-29.7	0.44	0.62	11.45	CAGACCUGGUUAGAAUCAAGAGAAUACACGAAGCACUUGAUCAAGGUUGAAAACUGGAUAUUCAGGAACCCCGGGUUUGCGCUAGUGGCCGUUGCCAUUGCCUGGCUUUUGGGAAGCUCG	(((((((((.....((((((...............))))))...((((.....((((....)))).))))))))))))).((.((((((....))))))))..((((((...))))))..	(((((((((...(.((((((...............)))))))..(((......((((....))))..)))))))))))).((.((((((....))))))))..((((((...))))))..	0.5
801	920	37	-27.7	0.74	0.75	17.25	AGACCUGGUUAGAAUCAAGAGAAUACACGAAGCACUUGAUCAAGGUUGAAAACUGGAUAUUCAGGAACCCCGGGUUUGCGCUAGUGGCCGUUGCCAUUGCCUGGCUUUUGGGAAGCUCGA	((((((((.....((((((...............))))))...((((.....((((....)))).))))))))))))..((.((((((....))))))))(.((((((...)))))).).	((((((((...(.((((((...............)))))))..(((......((((....))))..)))))))))))..((.((((((....))))))))..((((((...))))))...	0.49167
802	921	37	-26.5	1.22	0.91	33.36	GACCUGGUUAGAAUCAAGAGAAUACACGAAGCACUUGAUCAAGGUUGAAAACUGGAUAUUCAGGAACCCCGGGUUUGCGCUAGUGGCCGUUGCCAUUGCCUGGCUUUUGGGAAGCUCGAC	(((((((.....((((((...............))))))...((((.....((((....)))).)))))))))))...((.((((((....))))))))(.((((((...)))))).)..	.((((((......(((((...............))))).............((((....)))).....))))))....((.((((((....))))))))...((((.....)))).....	0.5
803	922	37	-25.2	1.5	0.92	37.66	ACCUGGUUAGAAUCAAGAGAAUACACGAAGCACUUGAUCAAGGUUGAAAACUGGAUAUUCAGGAACCCCGGGUUUGCGCUAGUGGCCGUUGCCAUUGCCUGGCUUUUGGGAAGCUCGACG	((((((.....((((((...............))))))...((((.....((((....)))).))))))))))....((.((((((....))))))))(.((((((...)))))).)...	............(((((...............))))).............(((......)))...............((.((((((....))))))))......................	0.5
804	923	37	-24.9	1.97	0.97	40.26	CCUGGUUAGAAUCAAGAGAAUACACGAAGCACUUGAUCAAGGUUGAAAACUGGAUAUUCAGGAACCCCGGGUUUGCGCUAGUGGCCGUUGCCAUUGCCUGGCUUUUGGGAAGCUCGACGA	..........((((((...............))))))....(((((...((((....))))....((((((((.(.((.((((((....))))))))).))))..))))....)))))..	...........(((((...............))))).............(((......)))...............((.((((((....)))))))).......................	0.5
805	924	37	-25.5	1.42	0.95	39.03	CUGGUUAGAAUCAAGAGAAUACACGAAGCACUUGAUCAAGGUUGAAAACUGGAUAUUCAGGAACCCCGGGUUUGCGCUAGUGGCCGUUGCCAUUGCCUGGCUUUUGGGAAGCUCGACGAG	((.(((((..(((((((.............(((((((.((........)).))...)))))....((((((.......((((((....)))))))))))))))))))....)).))).))	..........(((((...............))))).............(((......)))...............((.((((((....))))))))........................	0.5
806	925	37	-24.9	1.72	0.95	33.61	UGGUUAGAAUCAAGAGAAUACACGAAGCACUUGAUCAAGGUUGAAAACUGGAUAUUCAGGAACCCCGGGUUUGCGCUAGUGGCCGUUGCCAUUGCCUGGCUUUUGGGAAGCUCGACGAGC	........((((((...............))))))....(((((...((((....))))....((((((((.(.((.((((((....))))))))).))))..))))....)))))....	.........(((((...............))))).............(((......)))....(((.(((..(.((.((((((....)))))))))..)))...))).............	0.5
807	926	37	-25.6	1.53	0.97	36.9	GGUUAGAAUCAAGAGAAUACACGAAGCACUUGAUCAAGGUUGAAAACUGGAUAUUCAGGAACCCCGGGUUUGCGCUAGUGGCCGUUGCCAUUGCCUGGCUUUUGGGAAGCUCGACGAGCC	.......((((((...............))))))............((((....))))....((((((((.(.((.((((((....))))))))).))))..))))..((((...)))).	........(((((...............))))).............(((......))).........((....((.((((((....))))))))...)).....................	0.50833
808	927	37	-26.2	1.4	0.92	33.85	GUUAGAAUCAAGAGAAUACACGAAGCACUUGAUCAAGGUUGAAAACUGGAUAUUCAGGAACCCCGGGUUUGCGCUAGUGGCCGUUGCCAUUGCCUGGCUUUUGGGAAGCUCGACGAGCCA	......((((((...............))))))..((((......((((....))))(((((...))))).....((((((....))))))))))((((((((((...))))).))))).	......((((((...............))))))............(((......)))...............((.((((((....))))))))..((((((((((...))))).))))).	0.5
809	928	37	-27	0.83	0.77	29.64	UUAGAAUCAAGAGAAUACACGAAGCACUUGAUCAAGGUUGAAAACUGGAUAUUCAGGAACCCCGGGUUUGCGCUAGUGGCCGUUGCCAUUGCCUGGCUUUUGGGAAGCUCGACGAGCCAA	.....((((((...............))))))............((((....))))(((((...)))))..((.((((((....)))))))).(((((((((((...))))).)))))).	.....((((((...............))))))............(((......)))...............((.((((((....)))))))).(((((((((((...))))).)))))).	0.49167
810	929	37	-27	0.6	0.71	29.7	UAGAAUCAAGAGAAUACACGAAGCACUUGAUCAAGGUUGAAAACUGGAUAUUCAGGAACCCCGGGUUUGCGCUAGUGGCCGUUGCCAUUGCCUGGCUUUUGGGAAGCUCGACGAGCCAAA	....((((((...............))))))............((((....))))(((((...)))))..((.((((((....)))))))).(((((((((((...))))).))))))..	....((((((...............))))))............(((......)))...............((.((((((....)))))))).(((((((((((...))))).))))))..	0.49167
811	930	37	-27	0.6	0.7	29.75	AGAAUCAAGAGAAUACACGAAGCACUUGAUCAAGGUUGAAAACUGGAUAUUCAGGAACCCCGGGUUUGCGCUAGUGGCCGUUGCCAUUGCCUGGCUUUUGGGAAGCUCGACGAGCCAAAA	...((((((...............))))))............((((....))))(((((...)))))..((.((((((....)))))))).(((((((((((...))))).))))))...	...((((((...............))))))............(((......)))...............((.((((((....)))))))).(((((((((((...))))).))))))...	0.49167
812	931	37	-27.1	0.62	0.71	29.43	GAAUCAAGAGAAUACACGAAGCACUUGAUCAAGGUUGAAAACUGGAUAUUCAGGAACCCCGGGUUUGCGCUAGUGGCCGUUGCCAUUGCCUGGCUUUUGGGAAGCUCGACGAGCCAAAAA	((.(((((...............)))))))...........((((....))))(((((...)))))..((.((((((....)))))))).(((((((((((...))))).))))))....	..((((((...............))))))............(((......)))...............((.((((((....)))))))).(((((((((((...))))).))))))....	0.49167
813	932	37	-27	0.52	0.67	31.11	AAUCAAGAGAAUACACGAAGCACUUGAUCAAGGUUGAAAACUGGAUAUUCAGGAACCCCGGGUUUGCGCUAGUGGCCGUUGCCAUUGCCUGGCUUUUGGGAAGCUCGACGAGCCAAAAAG	.((((((...............))))))............((((....))))(((((...)))))..((.((((((....)))))))).(((((((((((...))))).)))))).....	.((((((...............))))))............(((......)))...............((.((((((....)))))))).(((((((((((...))))).)))))).....	0.49167
814	933	37	-26.4	0.88	0.83	33.21	AUCAAGAGAAUACACGAAGCACUUGAUCAAGGUUGAAAACUGGAUAUUCAGGAACCCCGGGUUUGCGCUAGUGGCCGUUGCCAUUGCCUGGCUUUUGGGAAGCUCGACGAGCCAAAAAGU	((((((...............))))))............((((....))))(((((...)))))..((.((((((....)))))))).(((((((((((...))))).))))))......	.......................................(((......)))...............((.((((((....)))))))).(((((((((((...))))).))))))......	0.49167
815	934	37	-26.4	1.2	0.85	34.08	UCAAGAGAAUACACGAAGCACUUGAUCAAGGUUGAAAACUGGAUAUUCAGGAACCCCGGGUUUGCGCUAGUGGCCGUUGCCAUUGCCUGGCUUUUGGGAAGCUCGACGAGCCAAAAAGUC	.................(((...((((..((.......((((....))))....))..)))))))((.((((((....)))))))).(((((((((((...))))).)))))).......	......................................(((......)))...............((.((((((....)))))))).(((((((((((...))))).)))))).......	0.5
816	935	37	-26.4	0.89	0.79	36.7	CAAGAGAAUACACGAAGCACUUGAUCAAGGUUGAAAACUGGAUAUUCAGGAACCCCGGGUUUGCGCUAGUGGCCGUUGCCAUUGCCUGGCUUUUGGGAAGCUCGACGAGCCAAAAAGUCA	................(((...((((..((.......((((....))))....))..)))))))((.((((((....)))))))).(((((((((((...))))).))))))........	.....................................(((......)))..((.....))....((.((((((....)))))))).(((((((((((...))))).))))))........	0.5
817	936	37	-26.4	0.79	0.75	37.9	AAGAGAAUACACGAAGCACUUGAUCAAGGUUGAAAACUGGAUAUUCAGGAACCCCGGGUUUGCGCUAGUGGCCGUUGCCAUUGCCUGGCUUUUGGGAAGCUCGACGAGCCAAAAAGUCAU	...............(((...((((..((.......((((....))))....))..)))))))((.((((((....)))))))).(((((((((((...))))).)))))).........	....................................(((......)))...............((.((((((....))))))))..(((((..............)))))..........	0.49167
818	937	37	-26.4	0.81	0.79	37.85	AGAGAAUACACGAAGCACUUGAUCAAGGUUGAAAACUGGAUAUUCAGGAACCCCGGGUUUGCGCUAGUGGCCGUUGCCAUUGCCUGGCUUUUGGGAAGCUCGACGAGCCAAAAAGUCAUA	..............(((...((((..((.......((((....))))....))..)))))))((.((((((....)))))))).(((((((((((...))))).))))))..........	...................................(((......)))...............((.((((((....))))))))..(((((..............)))))...........	0.49167
819	938	37	-26.4	0.92	0.78	37.94	GAGAAUACACGAAGCACUUGAUCAAGGUUGAAAACUGGAUAUUCAGGAACCCCGGGUUUGCGCUAGUGGCCGUUGCCAUUGCCUGGCUUUUGGGAAGCUCGACGAGCCAAAAAGUCAUAU	.............(((...((((..((.......((((....))))....))..)))))))((.((((((....)))))))).(((((((((((...))))).))))))...........	..................................(((......)))...(.....).....((.((((((....))))))))..(((((..............)))))............	0.49167
820	939	37	-26.4	0.67	0.73	37.61	AGAAUACACGAAGCACUUGAUCAAGGUUGAAAACUGGAUAUUCAGGAACCCCGGGUUUGCGCUAGUGGCCGUUGCCAUUGCCUGGCUUUUGGGAAGCUCGACGAGCCAAAAAGUCAUAUA	............(((...((((..((.......((((....))))....))..)))))))((.((((((....)))))))).(((((((((((...))))).))))))............	.................................(((......)))...............((.((((((....))))))))..((((................)))).............	0.48333
821	940	37	-26.4	0.82	0.83	37.79	GAAUACACGAAGCACUUGAUCAAGGUUGAAAACUGGAUAUUCAGGAACCCCGGGUUUGCGCUAGUGGCCGUUGCCAUUGCCUGGCUUUUGGGAAGCUCGACGAGCCAAAAAGUCAUAUAC	...........(((...((((..((.......((((....))))....))..)))))))((.((((((....)))))))).(((((((((((...))))).)))))).............	................................(((......)))..(((...)))....((.((((((....))))))))..((((................))))..............	0.49167
822	941	37	-26.4	0.61	0.71	35.84	AAUACACGAAGCACUUGAUCAAGGUUGAAAACUGGAUAUUCAGGAACCCCGGGUUUGCGCUAGUGGCCGUUGCCAUUGCCUGGCUUUUGGGAAGCUCGACGAGCCAAAAAGUCAUAUACU	..........(((...((((..((.......((((....))))....))..)))))))((.((((((....)))))))).(((((((((((...))))).))))))..............	...............................(((......)))...............((.((((((....))))))))..(((((..............)))))...............	0.48333
823	942	37	-26.4	0.99	0.84	35.98	AUACACGAAGCACUUGAUCAAGGUUGAAAACUGGAUAUUCAGGAACCCCGGGUUUGCGCUAGUGGCCGUUGCCAUUGCCUGGCUUUUGGGAAGCUCGACGAGCCAAAAAGUCAUAUACUU	.........(((...((((..((.......((((....))))....))..)))))))((.((((((....)))))))).(((((((((((...))))).))))))...............	..............................(((......)))...............((.((((((....)))))))).((((((((((.....)))).))))))...............	0.48333
824	943	37	-26.9	0.9	0.83	35.56	UACACGAAGCACUUGAUCAAGGUUGAAAACUGGAUAUUCAGGAACCCCGGGUUUGCGCUAGUGGCCGUUGCCAUUGCCUGGCUUUUGGGAAGCUCGACGAGCCAAAAAGUCAUAUACUUG	.................((((..(((...((((....))))(((((...)))))..((.((((((....)))))))).(((((((((((...))))).)))))).....)))....))))	.............................(((......))).((((...))))...((.((((((....)))))))).(((((((((((...))))).))))))................	0.49167
825	944	37	-28.3	0.61	0.7	37.15	ACACGAAGCACUUGAUCAAGGUUGAAAACUGGAUAUUCAGGAACCCCGGGUUUGCGCUAGUGGCCGUUGCCAUUGCCUGGCUUUUGGGAAGCUCGACGAGCCAAAAAGUCAUAUACUUGG	................((((..(((...((((....))))(((((...)))))..((.((((((....)))))))).(((((((((((...))))).)))))).....)))....)))).	............................(((......)))(((((...)))))..((.((((((....)))))))).((((((((((.....)))).)))))).................	0.5
826	945	37	-29.6	0.33	0.63	34.24	CACGAAGCACUUGAUCAAGGUUGAAAACUGGAUAUUCAGGAACCCCGGGUUUGCGCUAGUGGCCGUUGCCAUUGCCUGGCUUUUGGGAAGCUCGACGAGCCAAAAAGUCAUAUACUUGGU	.............((((((..(((...((((....))))(((((...)))))..((.((((((....)))))))).(((((((((((...))))).)))))).....)))....))))))	...........................(((......)))(((((...)))))..((.((((((....)))))))).(((((((((((...))))).))))))..................	0.5
827	946	37	-32.1	-0.24	0.38	21.23	ACGAAGCACUUGAUCAAGGUUGAAAACUGGAUAUUCAGGAACCCCGGGUUUGCGCUAGUGGCCGUUGCCAUUGCCUGGCUUUUGGGAAGCUCGACGAGCCAAAAAGUCAUAUACUUGGUC	...........(((((((..(((...((((....))))(((((...)))))..((.((((((....)))))))).(((((((((((...))))).)))))).....)))....)))))))	...........(((((((........((((....))))(((((...)))))..((.((((((....)))))))).(((((((((((...))))).))))))............)))))))	0.5
828	947	37	-33.9	-0.97	0.13	20.47	CGAAGCACUUGAUCAAGGUUGAAAACUGGAUAUUCAGGAACCCCGGGUUUGCGCUAGUGGCCGUUGCCAUUGCCUGGCUUUUGGGAAGCUCGACGAGCCAAAAAGUCAUAUACUUGGUCA	.........((((((((..(((...((((....))))(((((...)))))..((.((((((....)))))))).(((((((((((...))))).)))))).....)))....))))))))	.........((((((((........((((....))))(((((...)))))..((.((((((....)))))))).(((((((((((...))))).))))))............))))))))	0.5
829	948	37	-34.5	-1.09	0.13	20.29	GAAGCACUUGAUCAAGGUUGAAAACUGGAUAUUCAGGAACCCCGGGUUUGCGCUAGUGGCCGUUGCCAUUGCCUGGCUUUUGGGAAGCUCGACGAGCCAAAAAGUCAUAUACUUGGUCAU	........((((((((..(((...((((....))))(((((...)))))..((.((((((....)))))))).(((((((((((...))))).)))))).....)))....)))))))).	........((((((((........((((....))))(((((...)))))..((.((((((....)))))))).(((((((((((...))))).))))))............)))))))).	0.49167
830	949	37	-34.5	-1.16	0.17	20.72	AAGCACUUGAUCAAGGUUGAAAACUGGAUAUUCAGGAACCCCGGGUUUGCGCUAGUGGCCGUUGCCAUUGCCUGGCUUUUGGGAAGCUCGACGAGCCAAAAAGUCAUAUACUUGGUCAUG	.......((((((((..(((...((((....))))(((((...)))))..((.((((((....)))))))).(((((((((((...))))).)))))).....)))....))))))))..	.......((((((((........((((....))))(((((...)))))..((.((((((....)))))))).(((((((((((...))))).))))))............))))))))..	0.49167
831	950	37	-34.5	-0.98	0.15	21.13	AGCACUUGAUCAAGGUUGAAAACUGGAUAUUCAGGAACCCCGGGUUUGCGCUAGUGGCCGUUGCCAUUGCCUGGCUUUUGGGAAGCUCGACGAGCCAAAAAGUCAUAUACUUGGUCAUGA	......((((((((..(((...((((....))))(((((...)))))..((.((((((....)))))))).(((((((((((...))))).)))))).....)))....))))))))...	......((((((((........((((....))))(((((...)))))..((.((((((....)))))))).(((((((((((...))))).))))))............))))))))...	0.49167
832	951	37	-34.5	-0.6	0.3	21.15	GCACUUGAUCAAGGUUGAAAACUGGAUAUUCAGGAACCCCGGGUUUGCGCUAGUGGCCGUUGCCAUUGCCUGGCUUUUGGGAAGCUCGACGAGCCAAAAAGUCAUAUACUUGGUCAUGAU	.....((((((((..(((...((((....))))(((((...)))))..((.((((((....)))))))).(((((((((((...))))).)))))).....)))....))))))))....	.....((((((((........((((....))))(((((...)))))..((.((((((....)))))))).(((((((((((...))))).))))))............))))))))....	0.49167
833	952	37	-34.5	-1.1	0.15	21.05	CACUUGAUCAAGGUUGAAAACUGGAUAUUCAGGAACCCCGGGUUUGCGCUAGUGGCCGUUGCCAUUGCCUGGCUUUUGGGAAGCUCGACGAGCCAAAAAGUCAUAUACUUGGUCAUGAUA	....((((((((..(((...((((....))))(((((...)))))..((.((((((....)))))))).(((((((((((...))))).)))))).....)))....)))))))).....	....((((((((........((((....))))(((((...)))))..((.((((((....)))))))).(((((((((((...))))).))))))............)))))))).....	0.48333
834	953	37	-34.5	-0.91	0.16	20.69	ACUUGAUCAAGGUUGAAAACUGGAUAUUCAGGAACCCCGGGUUUGCGCUAGUGGCCGUUGCCAUUGCCUGGCUUUUGGGAAGCUCGACGAGCCAAAAAGUCAUAUACUUGGUCAUGAUAC	...((((((((..(((...((((....))))(((((...)))))..((.((((((....)))))))).(((((((((((...))))).)))))).....)))....))))))))......	...((((((((........((((....))))(((((...)))))..((.((((((....)))))))).(((((((((((...))))).))))))............))))))))......	0.48333
835	954	37	-34.5	-0.83	0.2	20.67	CUUGAUCAAGGUUGAAAACUGGAUAUUCAGGAACCCCGGGUUUGCGCUAGUGGCCGUUGCCAUUGCCUGGCUUUUGGGAAGCUCGACGAGCCAAAAAGUCAUAUACUUGGUCAUGAUACU	..((((((((..(((...((((....))))(((((...)))))..((.((((((....)))))))).(((((((((((...))))).)))))).....)))....)))))))).......	..((((((((........((((....))))(((((...)))))..((.((((((....)))))))).(((((((((((...))))).))))))............)))))))).......	0.48333
836	955	37	-34.5	-0.94	0.15	20.28	UUGAUCAAGGUUGAAAACUGGAUAUUCAGGAACCCCGGGUUUGCGCUAGUGGCCGUUGCCAUUGCCUGGCUUUUGGGAAGCUCGACGAGCCAAAAAGUCAUAUACUUGGUCAUGAUACUG	.((((((((..(((...((((....))))(((((...)))))..((.((((((....)))))))).(((((((((((...))))).)))))).....)))....))))))))........	.((((((((........((((....))))(((((...)))))..((.((((((....)))))))).(((((((((((...))))).))))))............))))))))........	0.48333
837	956	37	-34.3	-0.76	0.24	20.32	UGAUCAAGGUUGAAAACUGGAUAUUCAGGAACCCCGGGUUUGCGCUAGUGGCCGUUGCCAUUGCCUGGCUUUUGGGAAGCUCGACGAGCCAAAAAGUCAUAUACUUGGUCAUGAUACUGC	((((((((..(((...((((....))))(((((...)))))..((.((((((....)))))))).(((((((((((...))))).)))))).....)))....)))))))).........	((((((((........((((....))))(((((...)))))..((.((((((....)))))))).(((((((((((...))))).))))))............)))))))).........	0.49167
838	957	37	-33.8	-0.86	0.17	19.98	GAUCAAGGUUGAAAACUGGAUAUUCAGGAACCCCGGGUUUGCGCUAGUGGCCGUUGCCAUUGCCUGGCUUUUGGGAAGCUCGACGAGCCAAAAAGUCAUAUACUUGGUCAUGAUACUGCU	(((((((..(((...((((....))))(((((...)))))..((.((((((....)))))))).(((((((((((...))))).)))))).....)))....)))))))...........	(((((((........((((....))))(((((...)))))..((.((((((....)))))))).(((((((((((...))))).))))))............)))))))...........	0.49167
839	958	37	-29.3	0.44	0.63	26.86	AUCAAGGUUGAAAACUGGAUAUUCAGGAACCCCGGGUUUGCGCUAGUGGCCGUUGCCAUUGCCUGGCUUUUGGGAAGCUCGACGAGCCAAAAAGUCAUAUACUUGGUCAUGAUACUGCUG	((((((..(((...((((....))))(((((...)))))..((.((((((....)))))))).(((((((((((...))))).)))))).....)))....)))))).............	((((((........((((....))))(((((...)))))..((.((((((....)))))))).(((((((((((...))))).))))))............)))))).............	0.49167
840	959	37	-28.4	0.86	0.8	32.09	UCAAGGUUGAAAACUGGAUAUUCAGGAACCCCGGGUUUGCGCUAGUGGCCGUUGCCAUUGCCUGGCUUUUGGGAAGCUCGACGAGCCAAAAAGUCAUAUACUUGGUCAUGAUACUGCUGA	(((((..(((...((((....))))(((((...)))))..((.((((((....)))))))).(((((((((((...))))).)))))).....)))....)))))...............	.((((........((((....))))(((((...)))))..((.((((((....)))))))).(((((((((((...))))).))))))............))))................	0.49167
841	960	37	-28.1	0.83	0.8	31.57	CAAGGUUGAAAACUGGAUAUUCAGGAACCCCGGGUUUGCGCUAGUGGCCGUUGCCAUUGCCUGGCUUUUGGGAAGCUCGACGAGCCAAAAAGUCAUAUACUUGGUCAUGAUACUGCUGAU	((((..(((...((((....))))(((((...)))))..((.((((((....)))))))).(((((((((((...))))).)))))).....)))....)))).................	((((........((((....))))(((((...)))))..((.((((((....)))))))).(((((((((((...))))).))))))............)))).((...........)).	0.49167
842	961	37	-26.6	1.21	0.9	41.55	AAGGUUGAAAACUGGAUAUUCAGGAACCCCGGGUUUGCGCUAGUGGCCGUUGCCAUUGCCUGGCUUUUGGGAAGCUCGACGAGCCAAAAAGUCAUAUACUUGGUCAUGAUACUGCUGAUU	...................(((((((((...)))))..((.((((((....)))))))).(((((((((((...))))).))))))....(((((..........)))))....))))..	...........(((......))).((((...))))...((.((((((....))))))))..(((((((((.....)))).)))))...................................	0.48333
843	962	37	-26.6	1.15	0.88	41.9	AGGUUGAAAACUGGAUAUUCAGGAACCCCGGGUUUGCGCUAGUGGCCGUUGCCAUUGCCUGGCUUUUGGGAAGCUCGACGAGCCAAAAAGUCAUAUACUUGGUCAUGAUACUGCUGAUUG	..................(((((((((...)))))..((.((((((....)))))))).(((((((((((...))))).))))))....(((((..........)))))....))))...	..........(((......)))..(((...)))....((.((((((....)))))))).((((((((((.....)))).))))))...................................	0.49167
844	963	37	-26.6	1.47	0.95	42.4	GGUUGAAAACUGGAUAUUCAGGAACCCCGGGUUUGCGCUAGUGGCCGUUGCCAUUGCCUGGCUUUUGGGAAGCUCGACGAGCCAAAAAGUCAUAUACUUGGUCAUGAUACUGCUGAUUGC	.................(((((((((...)))))..((.((((((....)))))))).(((((((((((...))))).))))))....(((((..........)))))....))))....	.........(((......)))...............((.((((((....))))))))..(((((.(((.....)))..))))).....................................	0.5
845	964	37	-28.1	1.09	0.86	34.54	GUUGAAAACUGGAUAUUCAGGAACCCCGGGUUUGCGCUAGUGGCCGUUGCCAUUGCCUGGCUUUUGGGAAGCUCGACGAGCCAAAAAGUCAUAUACUUGGUCAUGAUACUGCUGAUUGCC	..........((.((.(((((((((...)))))..((.((((((....)))))))).(((((((((((...))))).))))))....(((((..........)))))....)))).))))	..........((....(((((((((...)))))..((.((((((....)))))))).(((((((((((...))))).)))))).....(((............))).....))))...))	0.5
846	965	37	-28.9	0.74	0.76	42.74	UUGAAAACUGGAUAUUCAGGAACCCCGGGUUUGCGCUAGUGGCCGUUGCCAUUGCCUGGCUUUUGGGAAGCUCGACGAGCCAAAAAGUCAUAUACUUGGUCAUGAUACUGCUGAUUGCCC	.........((.((.(((((((((...)))))..((.((((((....)))))))).(((((((((((...))))).))))))....(((((..........)))))....)))).)))).	................(((...............((.((((((....))))))))..(((((.((.......))..))))).............................))).......	0.5
847	966	37	-29.6	0.68	0.71	42.81	UGAAAACUGGAUAUUCAGGAACCCCGGGUUUGCGCUAGUGGCCGUUGCCAUUGCCUGGCUUUUGGGAAGCUCGACGAGCCAAAAAGUCAUAUACUUGGUCAUGAUACUGCUGAUUGCCCC	......((((....)))).......((((...((.(((((..(((.((((.....((((((((.....((((...))))..))))))))......)))).))).))))).))...)))).	......(((......))).......((((........(((((....)))))................................................................)))).	0.50833
848	967	37	-29.6	0.73	0.75	44.28	GAAAACUGGAUAUUCAGGAACCCCGGGUUUGCGCUAGUGGCCGUUGCCAUUGCCUGGCUUUUGGGAAGCUCGACGAGCCAAAAAGUCAUAUACUUGGUCAUGAUACUGCUGAUUGCCCCG	.....((((....)))).......((((...((.(((((..(((.((((.....((((((((.....((((...))))..))))))))......)))).))).))))).))...))))..	.....(((......)))...................(((((....))))).....((((................)))).........................................	0.51667
849	968	37	-32.4	0.28	0.58	39.28	AAAACUGGAUAUUCAGGAACCCCGGGUUUGCGCUAGUGGCCGUUGCCAUUGCCUGGCUUUUGGGAAGCUCGACGAGCCAAAAAGUCAUAUACUUGGUCAUGAUACUGCUGAUUGCCCCGG	....((((....)))).....(((((...(((.((((((.(((.((((.....((((((((.....((((...))))..))))))))......)))).)))...))))))..))))))))	....((((....)))).....(((((.........(((((....))))).....((((................)))).....................................)))))	0.51667
850	969	37	-32.8	0.18	0.5	39.51	AAACUGGAUAUUCAGGAACCCCGGGUUUGCGCUAGUGGCCGUUGCCAUUGCCUGGCUUUUGGGAAGCUCGACGAGCCAAAAAGUCAUAUACUUGGUCAUGAUACUGCUGAUUGCCCCGGC	...((((....)))).....(((((...(((.((((((.(((.((((.....((((((((.....((((...))))..))))))))......)))).)))...))))))..)))))))).	...((((....)))).....(((((.........(((((....))))).....((((................)))).....................................))))).	0.525
851	970	37	-32.8	0.14	0.52	39.82	AACUGGAUAUUCAGGAACCCCGGGUUUGCGCUAGUGGCCGUUGCCAUUGCCUGGCUUUUGGGAAGCUCGACGAGCCAAAAAGUCAUAUACUUGGUCAUGAUACUGCUGAUUGCCCCGGCA	..((((....)))).....(((((...(((.((((((.(((.((((.....((((((((.....((((...))))..))))))))......)))).)))...))))))..))))))))..	..((((....)))).....(((((.........(((((....))))).....((((................)))).....................................)))))..	0.525
852	971	37	-32.8	0.11	0.53	40.14	ACUGGAUAUUCAGGAACCCCGGGUUUGCGCUAGUGGCCGUUGCCAUUGCCUGGCUUUUGGGAAGCUCGACGAGCCAAAAAGUCAUAUACUUGGUCAUGAUACUGCUGAUUGCCCCGGCAU	.((((....)))).....(((((...(((.((((((.(((.((((.....((((((((.....((((...))))..))))))))......)))).)))...))))))..))))))))...	.((((....)))).....(((((.........(((((....))))).....((((................)))).....................................)))))...	0.525
853	972	37	-32.5	0.45	0.61	39.92	CUGGAUAUUCAGGAACCCCGGGUUUGCGCUAGUGGCCGUUGCCAUUGCCUGGCUUUUGGGAAGCUCGACGAGCCAAAAAGUCAUAUACUUGGUCAUGAUACUGCUGAUUGCCCCGGCAUA	((((....)))).....(((((...(((.((((((.(((.((((.....((((((((.....((((...))))..))))))))......)))).)))...))))))..))))))))....	((((....)))).....(((((.........(((((....))))).....((((................)))).....................................)))))....	0.525
854	973	37	-30.6	0.92	0.82	44.3	UGGAUAUUCAGGAACCCCGGGUUUGCGCUAGUGGCCGUUGCCAUUGCCUGGCUUUUGGGAAGCUCGACGAGCCAAAAAGUCAUAUACUUGGUCAUGAUACUGCUGAUUGCCCCGGCAUAC	................(((((...(((.((((((.(((.((((.....((((((((.....((((...))))..))))))))......)))).)))...))))))..)))))))).....	................(((((........((((((....))))))....((((................)))).....................................))))).....	0.525
855	974	37	-30.6	0.92	0.8	44.06	GGAUAUUCAGGAACCCCGGGUUUGCGCUAGUGGCCGUUGCCAUUGCCUGGCUUUUGGGAAGCUCGACGAGCCAAAAAGUCAUAUACUUGGUCAUGAUACUGCUGAUUGCCCCGGCAUACA	...............(((((...(((.((((((.(((.((((.....((((((((.....((((...))))..))))))))......)))).)))...))))))..))))))))......	...............(((((........((((((....))))))....((((................)))).....................................)))))......	0.525
856	975	37	-30.6	0.87	0.78	43.75	GAUAUUCAGGAACCCCGGGUUUGCGCUAGUGGCCGUUGCCAUUGCCUGGCUUUUGGGAAGCUCGACGAGCCAAAAAGUCAUAUACUUGGUCAUGAUACUGCUGAUUGCCCCGGCAUACAG	..............(((((...(((.((((((.(((.((((.....((((((((.....((((...))))..))))))))......)))).)))...))))))..)))))))).......	..............(((((.........(((((....)))))..................................................................))))).......	0.525
857	976	37	-30.6	0.34	0.56	47.27	AUAUUCAGGAACCCCGGGUUUGCGCUAGUGGCCGUUGCCAUUGCCUGGCUUUUGGGAAGCUCGACGAGCCAAAAAGUCAUAUACUUGGUCAUGAUACUGCUGAUUGCCCCGGCAUACAGU	.............(((((...(((.((((((.(((.((((.....((((((((.....((((...))))..))))))))......)))).)))...))))))..))))))))........	...........................(((((....)))))...............................................................................	0.51667
858	977	37	-31.3	0.41	0.63	41.19	UAUUCAGGAACCCCGGGUUUGCGCUAGUGGCCGUUGCCAUUGCCUGGCUUUUGGGAAGCUCGACGAGCCAAAAAGUCAUAUACUUGGUCAUGAUACUGCUGAUUGCCCCGGCAUACAGUA	...(((.((...((((((....(((..(((((((((...((.((........)).))...))))).))))...))).....)))))))).)))...(((((..(((....)))..)))))	...(((.((...((((((.......((((((....))))))........................................)))))))).)))....((((..(((....)))..)))).	0.51667
859	978	37	-32	0.13	0.52	37.21	AUUCAGGAACCCCGGGUUUGCGCUAGUGGCCGUUGCCAUUGCCUGGCUUUUGGGAAGCUCGACGAGCCAAAAAGUCAUAUACUUGGUCAUGAUACUGCUGAUUGCCCCGGCAUACAGUAU	..(((.((...((((((....(((..(((((((((...((.((........)).))...))))).))))...))).....)))))))).)))...(((((..(((....)))..))))).	..(((.((...((((((.......((((((....))))))........................................)))))))).)))...(((((..(((....)))..))))).	0.51667
860	979	37	-32	0.28	0.53	41.91	UUCAGGAACCCCGGGUUUGCGCUAGUGGCCGUUGCCAUUGCCUGGCUUUUGGGAAGCUCGACGAGCCAAAAAGUCAUAUACUUGGUCAUGAUACUGCUGAUUGCCCCGGCAUACAGUAUC	.(((.((...((((((....(((..(((((((((...((.((........)).))...))))).))))...))).....)))))))).)))...(((((..(((....)))..)))))..	..........((((((.......((((((....))))))........................................))))))................(((....))).........	0.525
861	980	37	-33.4	-0.16	0.35	36.37	UCAGGAACCCCGGGUUUGCGCUAGUGGCCGUUGCCAUUGCCUGGCUUUUGGGAAGCUCGACGAGCCAAAAAGUCAUAUACUUGGUCAUGAUACUGCUGAUUGCCCCGGCAUACAGUAUCA	.........((((((....(((..(((((((((...((.((........)).))...))))).))))...))).....))))))...((((((((.....(((....)))..))))))))	.........((((((....((.((((((....))))))))......................................))))))...((((((((.....(((....)))..))))))))	0.525
862	981	37	-33.9	0.02	0.5	34.13	CAGGAACCCCGGGUUUGCGCUAGUGGCCGUUGCCAUUGCCUGGCUUUUGGGAAGCUCGACGAGCCAAAAAGUCAUAUACUUGGUCAUGAUACUGCUGAUUGCCCCGGCAUACAGUAUCAG	........((((((....(((..(((((((((...((.((........)).))...))))).))))...))).....))))))...((((((((.....(((....)))..)))))))).	........((((((.......((((((....))))))........................................))))))...((((((((.....(((....)))..)))))))).	0.53333
863	982	37	-33.9	0.03	0.46	33.75	AGGAACCCCGGGUUUGCGCUAGUGGCCGUUGCCAUUGCCUGGCUUUUGGGAAGCUCGACGAGCCAAAAAGUCAUAUACUUGGUCAUGAUACUGCUGAUUGCCCCGGCAUACAGUAUCAGG	.......((((((....(((..(((((((((...((.((........)).))...))))).))))...))).....))))))...((((((((.....(((....)))..))))))))..	.......((((((.......((((((....))))))........................................))))))...((((((((.....(((....)))..))))))))..	0.53333
864	983	37	-33.9	0.11	0.5	36.56	GGAACCCCGGGUUUGCGCUAGUGGCCGUUGCCAUUGCCUGGCUUUUGGGAAGCUCGACGAGCCAAAAAGUCAUAUACUUGGUCAUGAUACUGCUGAUUGCCCCGGCAUACAGUAUCAGGU	......((((((....(((..(((((((((...((.((........)).))...))))).))))...))).....))))))...((((((((.....(((....)))..))))))))...	......((((((.......((((((....))))))........................................))))))...((((((((.....(((....)))..))))))))...	0.53333
865	984	37	-34.4	-0.12	0.39	40.2	GAACCCCGGGUUUGCGCUAGUGGCCGUUGCCAUUGCCUGGCUUUUGGGAAGCUCGACGAGCCAAAAAGUCAUAUACUUGGUCAUGAUACUGCUGAUUGCCCCGGCAUACAGUAUCAGGUG	..(((((((((....(((..(((((((((...((.((........)).))...))))).))))...))).....))))))...((((((((.....(((....)))..))))))))))).	.....((((((....(..((((((....)))))).)......................................))))))...((((((((.....(((....)))..))))))))....	0.53333
866	985	37	-34.4	-0.21	0.36	36.73	AACCCCGGGUUUGCGCUAGUGGCCGUUGCCAUUGCCUGGCUUUUGGGAAGCUCGACGAGCCAAAAAGUCAUAUACUUGGUCAUGAUACUGCUGAUUGCCCCGGCAUACAGUAUCAGGUGC	.(((((((((....(((..(((((((((...((.((........)).))...))))).))))...))).....))))))...((((((((.....(((....)))..)))))))))))..	....((((((.......((((((....))))))........................................))))))...((((((((.....(((....)))..)))))))).....	0.53333
867	986	37	-34.2	0.01	0.44	38.79	ACCCCGGGUUUGCGCUAGUGGCCGUUGCCAUUGCCUGGCUUUUGGGAAGCUCGACGAGCCAAAAAGUCAUAUACUUGGUCAUGAUACUGCUGAUUGCCCCGGCAUACAGUAUCAGGUGCA	..........((((((((((((....))))))...(((((((((((...))))).))))))..((((.....)))).....((((((((.....(((....)))..))))))))))))))	................((((((....))))))....(((..................))).....................((((((((.....(((....)))..))))))))......	0.53333
868	987	37	-34.8	0.01	0.46	35.96	CCCCGGGUUUGCGCUAGUGGCCGUUGCCAUUGCCUGGCUUUUGGGAAGCUCGACGAGCCAAAAAGUCAUAUACUUGGUCAUGAUACUGCUGAUUGCCCCGGCAUACAGUAUCAGGUGCAU	.........((((((((((((....))))))...(((((((((((...))))).))))))..((((.....)))).....((((((((.....(((....)))..)))))))))))))).	..........((((.((((((....))))))....(((((.((.......))..))))).....................((((((((.....(((....)))..)))))))).))))..	0.53333
869	988	37	-34.8	-0.34	0.36	35.56	CCCGGGUUUGCGCUAGUGGCCGUUGCCAUUGCCUGGCUUUUGGGAAGCUCGACGAGCCAAAAAGUCAUAUACUUGGUCAUGAUACUGCUGAUUGCCCCGGCAUACAGUAUCAGGUGCAUU	........((((((((((((....))))))...(((((((((((...))))).))))))..((((.....)))).....((((((((.....(((....)))..))))))))))))))..	.........((((.((((((....))))))....(((((.((.......))..))))).....................((((((((.....(((....)))..)))))))).))))...	0.525
870	989	37	-34.8	-0.07	0.44	32.44	CCGGGUUUGCGCUAGUGGCCGUUGCCAUUGCCUGGCUUUUGGGAAGCUCGACGAGCCAAAAAGUCAUAUACUUGGUCAUGAUACUGCUGAUUGCCCCGGCAUACAGUAUCAGGUGCAUUG	.......((((((((((((....))))))...(((((((((((...))))).))))))..((((.....)))).....((((((((.....(((....)))..))))))))))))))...	.......((((((((((((....))))))...(((((((((((...))))).))))))....................((((((((.....(((....)))..))))))))))))))...	0.525
871	990	37	-34.8	-0.05	0.44	25.74	CGGGUUUGCGCUAGUGGCCGUUGCCAUUGCCUGGCUUUUGGGAAGCUCGACGAGCCAAAAAGUCAUAUACUUGGUCAUGAUACUGCUGAUUGCCCCGGCAUACAGUAUCAGGUGCAUUGG	......((((((((((((....))))))...(((((((((((...))))).))))))..((((.....)))).....((((((((.....(((....)))..))))))))))))))....	......((((((((((((....))))))...(((((((((((...))))).))))))....................((((((((.....(((....)))..))))))))))))))....	0.525
872	991	37	-34.8	-0.26	0.37	25.01	GGGUUUGCGCUAGUGGCCGUUGCCAUUGCCUGGCUUUUGGGAAGCUCGACGAGCCAAAAAGUCAUAUACUUGGUCAUGAUACUGCUGAUUGCCCCGGCAUACAGUAUCAGGUGCAUUGGA	.....((((((((((((....))))))...(((((((((((...))))).))))))..((((.....)))).....((((((((.....(((....)))..)))))))))))))).....	.....((((((((((((....))))))...(((((((((((...))))).))))))....................((((((((.....(((....)))..)))))))))))))).....	0.51667
873	992	37	-34.8	-0.25	0.34	25.25	GGUUUGCGCUAGUGGCCGUUGCCAUUGCCUGGCUUUUGGGAAGCUCGACGAGCCAAAAAGUCAUAUACUUGGUCAUGAUACUGCUGAUUGCCCCGGCAUACAGUAUCAGGUGCAUUGGAG	....((((((((((((....))))))...(((((((((((...))))).))))))..((((.....)))).....((((((((.....(((....)))..))))))))))))))......	....((((((((((((....))))))...(((((((((((...))))).))))))....................((((((((.....(((....)))..))))))))))))))......	0.51667
874	993	37	-34.8	-0.34	0.33	24.82	GUUUGCGCUAGUGGCCGUUGCCAUUGCCUGGCUUUUGGGAAGCUCGACGAGCCAAAAAGUCAUAUACUUGGUCAUGAUACUGCUGAUUGCCCCGGCAUACAGUAUCAGGUGCAUUGGAGU	...((((((((((((....))))))...(((((((((((...))))).))))))..((((.....)))).....((((((((.....(((....)))..)))))))))))))).......	...((((((((((((....))))))...(((((((((((...))))).))))))....................((((((((.....(((....)))..)))))))))))))).......	0.50833
875	994	37	-34.8	-0.66	0.25	25.18	UUUGCGCUAGUGGCCGUUGCCAUUGCCUGGCUUUUGGGAAGCUCGACGAGCCAAAAAGUCAUAUACUUGGUCAUGAUACUGCUGAUUGCCCCGGCAUACAGUAUCAGGUGCAUUGGAGUC	..((((((((((((....))))))...(((((((((((...))))).))))))..((((.....)))).....((((((((.....(((....)))..))))))))))))))........	..((((((((((((....))))))...(((((((((((...))))).))))))....................((((((((.....(((....)))..))))))))))))))........	0.50833
876	995	37	-34.8	-0.45	0.29	25.42	UUGCGCUAGUGGCCGUUGCCAUUGCCUGGCUUUUGGGAAGCUCGACGAGCCAAAAAGUCAUAUACUUGGUCAUGAUACUGCUGAUUGCCCCGGCAUACAGUAUCAGGUGCAUUGGAGUCA	.((((((((((((....))))))...(((((((((((...))))).))))))..((((.....)))).....((((((((.....(((....)))..)))))))))))))).........	.((((((((((((....))))))...(((((((((((...))))).))))))....................((((((((.....(((....)))..)))))))))))))).........	0.50833
877	996	37	-34.6	-0.56	0.21	26.68	UGCGCUAGUGGCCGUUGCCAUUGCCUGGCUUUUGGGAAGCUCGACGAGCCAAAAAGUCAUAUACUUGGUCAUGAUACUGCUGAUUGCCCCGGCAUACAGUAUCAGGUGCAUUGGAGUCAG	((((((((((((....))))))...(((((((((((...))))).))))))..((((.....)))).....((((((((.....(((....)))..))))))))))))))..........	((((((((((((....))))))...(((((((((((...))))).))))))....................((((((((.....(((....)))..))))))))))))))..........	0.51667
878	997	37	-34.2	0.03	0.48	36.8	GCGCUAGUGGCCGUUGCCAUUGCCUGGCUUUUGGGAAGCUCGACGAGCCAAAAAGUCAUAUACUUGGUCAUGAUACUGCUGAUUGCCCCGGCAUACAGUAUCAGGUGCAUUGGAGUCAGC	..((.((((((....)))))))).(((((((((((...))))).))))))....(((((..........)))))...(((((((.((...((((..........))))...)))))))))	((((.((((((....))))))...(((((((((((...))))).))))))....................(((((((...................))))))).))))............	0.525
879	998	37	-35.9	-0.85	0.17	15.7	CGCUAGUGGCCGUUGCCAUUGCCUGGCUUUUGGGAAGCUCGACGAGCCAAAAAGUCAUAUACUUGGUCAUGAUACUGCUGAUUGCCCCGGCAUACAGUAUCAGGUGCAUUGGAGUCAGCA	.((.((((((....)))))))).(((((((((((...))))).))))))....(((((..........)))))..((((((((.((...((((..........))))...))))))))))	.((.((((((....)))))))).(((((((((((...))))).))))))....(((((..........)))))..((((((((.((...((((..........))))...))))))))))	0.51667
880	999	37	-36.5	-1.12	0.13	14.72	GCUAGUGGCCGUUGCCAUUGCCUGGCUUUUGGGAAGCUCGACGAGCCAAAAAGUCAUAUACUUGGUCAUGAUACUGCUGAUUGCCCCGGCAUACAGUAUCAGGUGCAUUGGAGUCAGCAA	((.((((((....)))))))).(((((((((((...))))).))))))....(((((..........)))))..((((((((.((...((((..........))))...)))))))))).	((.((((((....)))))))).(((((((((((...))))).))))))....(((((..........)))))..((((((((.((...((((..........))))...)))))))))).	0.50833
881	1000	37	-35.2	-1.28	0.11	22.03	CUAGUGGCCGUUGCCAUUGCCUGGCUUUUGGGAAGCUCGACGAGCCAAAAAGUCAUAUACUUGGUCAUGAUACUGCUGAUUGCCCCGGCAUACAGUAUCAGGUGCAUUGGAGUCAGCAAU	.(((((((....)))))))..(((((((((((...))))).))))))....(((((..........)))))..((((((((.((...((((..........))))...))))))))))..	.(((((((....)))))))..(((((((((((...))))).))))))....(((((..........)))))..((((((((.((...((((..........))))...))))))))))..	0.5
882	1001	37	-35	-1.1	0.12	23.75	UAGUGGCCGUUGCCAUUGCCUGGCUUUUGGGAAGCUCGACGAGCCAAAAAGUCAUAUACUUGGUCAUGAUACUGCUGAUUGCCCCGGCAUACAGUAUCAGGUGCAUUGGAGUCAGCAAUA	(((((((....)))))))..(((((((((((...))))).))))))....(((((..........)))))..((((((((.((...((((..........))))...))))))))))...	.((((((....))))))...(((((((((((...))))).))))))....(((((..........)))))..((((((((.((...((((..........))))...))))))))))...	0.49167
883	1002	37	-34.2	-0.68	0.23	30.87	AGUGGCCGUUGCCAUUGCCUGGCUUUUGGGAAGCUCGACGAGCCAAAAAGUCAUAUACUUGGUCAUGAUACUGCUGAUUGCCCCGGCAUACAGUAUCAGGUGCAUUGGAGUCAGCAAUAG	((((((....))))))...(((((((((((...))))).))))))....(((((..........)))))..((((((((.((...((((..........))))...))))))))))....	.(((((....))))).....(((((.((.......))..)))))...........................((((((((.((...((((..........))))...))))))))))....	0.5
884	1003	37	-34	-0.45	0.28	32.8	GUGGCCGUUGCCAUUGCCUGGCUUUUGGGAAGCUCGACGAGCCAAAAAGUCAUAUACUUGGUCAUGAUACUGCUGAUUGCCCCGGCAUACAGUAUCAGGUGCAUUGGAGUCAGCAAUAGA	.(((((((((...((.((........)).))...))))).))))....(((((..........)))))..((((((((.((...((((..........))))...)))))))))).....	......................................................................((((((((.((...((((..........))))...)))))))))).....	0.5
885	1004	37	-34	-0.61	0.23	23.16	UGGCCGUUGCCAUUGCCUGGCUUUUGGGAAGCUCGACGAGCCAAAAAGUCAUAUACUUGGUCAUGAUACUGCUGAUUGCCCCGGCAUACAGUAUCAGGUGCAUUGGAGUCAGCAAUAGAG	(((((((((...((.((........)).))...))))).))))....(((((..........)))))..((((((((.((...((((..........))))...))))))))))......	(((((((((...((.((........)).))...))))).))))....(((((..........)))))..((((((((.((...((((..........))))...))))))))))......	0.5
886	1005	37	-33.3	-0.85	0.21	30.45	GGCCGUUGCCAUUGCCUGGCUUUUGGGAAGCUCGACGAGCCAAAAAGUCAUAUACUUGGUCAUGAUACUGCUGAUUGCCCCGGCAUACAGUAUCAGGUGCAUUGGAGUCAGCAAUAGAGA	((((((((...((.((........)).))...))))).))).....(((((..........)))))..((((((((.((...((((..........))))...)))))))))).......	((((((((......((........))......))))).)))...........................((((((((.((...((((..........))))...)))))))))).......	0.5
887	1006	37	-32.4	-0.43	0.32	26.89	GCCGUUGCCAUUGCCUGGCUUUUGGGAAGCUCGACGAGCCAAAAAGUCAUAUACUUGGUCAUGAUACUGCUGAUUGCCCCGGCAUACAGUAUCAGGUGCAUUGGAGUCAGCAAUAGAGAC	..(((.((((.....((((((((.....((((...))))..))))))))......)))).)))....((((((((.((...((((..........))))...))))))))))........	..(((.((((.....(((((((......((((...))))...)))))))......)))).)))....((((((((.((...((((..........))))...))))))))))........	0.5
888	1007	37	-32.4	-0.56	0.3	26.27	CCGUUGCCAUUGCCUGGCUUUUGGGAAGCUCGACGAGCCAAAAAGUCAUAUACUUGGUCAUGAUACUGCUGAUUGCCCCGGCAUACAGUAUCAGGUGCAUUGGAGUCAGCAAUAGAGACU	.(((.((((.....((((((((.....((((...))))..))))))))......)))).)))....((((((((.((...((((..........))))...)))))))))).........	.(((.((((.....(((((((......((((...))))...)))))))......)))).)))....((((((((.((...((((..........))))...)))))))))).........	0.49167
889	1008	37	-32	-0.45	0.33	30.88	CGUUGCCAUUGCCUGGCUUUUGGGAAGCUCGACGAGCCAAAAAGUCAUAUACUUGGUCAUGAUACUGCUGAUUGCCCCGGCAUACAGUAUCAGGUGCAUUGGAGUCAGCAAUAGAGACUU	(((.((((.....((((((((.....((((...))))..))))))))......)))).)))....((((((((.((...((((..........))))...))))))))))..........	(((.((((.....(((((((......((((...))))...)))))))......)))).)))....((((((((.((...((((..........))))...))))))))))..........	0.48333
890	1009	37	-30	-0.13	0.43	48.63	GUUGCCAUUGCCUGGCUUUUGGGAAGCUCGACGAGCCAAAAAGUCAUAUACUUGGUCAUGAUACUGCUGAUUGCCCCGGCAUACAGUAUCAGGUGCAUUGGAGUCAGCAAUAGAGACUUC	(((((((.(((.(((((((((((...))))).))))))...........(((((((..((.((.(((((.......)))))))))..)))))))))).)))...))))............	........................................................................................................................	0.48333
891	1010	37	-30.3	-0.28	0.35	41.72	UUGCCAUUGCCUGGCUUUUGGGAAGCUCGACGAGCCAAAAAGUCAUAUACUUGGUCAUGAUACUGCUGAUUGCCCCGGCAUACAGUAUCAGGUGCAUUGGAGUCAGCAAUAGAGACUUCG	..((((.....((((((((.....((((...))))..))))))))......))))..((((((((.....(((....)))..))))))))........((((((.........)))))).	...........(((((........................)))))............((((((((......((....))...))))))))........((((((.........)))))).	0.48333
892	1011	37	-30.3	-0.03	0.44	41.75	UGCCAUUGCCUGGCUUUUGGGAAGCUCGACGAGCCAAAAAGUCAUAUACUUGGUCAUGAUACUGCUGAUUGCCCCGGCAUACAGUAUCAGGUGCAUUGGAGUCAGCAAUAGAGACUUCGU	.((((.....((((((((.....((((...))))..))))))))......))))..((((((((.....(((....)))..))))))))........((((((.........))))))..	..........(((((........................)))))............((((((((......((....))...))))))))........((((((.........))))))..	0.48333
893	1012	37	-30.5	0.22	0.51	45.95	GCCAUUGCCUGGCUUUUGGGAAGCUCGACGAGCCAAAAAGUCAUAUACUUGGUCAUGAUACUGCUGAUUGCCCCGGCAUACAGUAUCAGGUGCAUUGGAGUCAGCAAUAGAGACUUCGUG	((((.....((((((((.....((((...))))..))))))))......))))(((((((.((((((((.((...((((..........))))...)))))))))).))......)))))	.........((((((......................)))))).....................................................((((((.........))))))...	0.49167
894	1013	37	-30.7	0.03	0.51	47.35	CCAUUGCCUGGCUUUUGGGAAGCUCGACGAGCCAAAAAGUCAUAUACUUGGUCAUGAUACUGCUGAUUGCCCCGGCAUACAGUAUCAGGUGCAUUGGAGUCAGCAAUAGAGACUUCGUGG	((((....(((((((((((...))))).))))))..((((.....))))((((....((.((((((((.((...((((..........))))...)))))))))).))..))))..))))	.........(((((..(.......)...)))))..............................................................((((((.........))))))....	0.49167
895	1014	37	-30.6	-0.25	0.33	45.64	CAUUGCCUGGCUUUUGGGAAGCUCGACGAGCCAAAAAGUCAUAUACUUGGUCAUGAUACUGCUGAUUGCCCCGGCAUACAGUAUCAGGUGCAUUGGAGUCAGCAAUAGAGACUUCGUGGA	.......(((((((((((...))))).))))))..........(((..((((....((.((((((((.((...((((..........))))...)))))))))).))..))))..)))..	.......(((((((((((...))))).)))))).............................................................((((((.........)))))).....	0.48333
896	1015	37	-30.6	0.03	0.46	45.73	AUUGCCUGGCUUUUGGGAAGCUCGACGAGCCAAAAAGUCAUAUACUUGGUCAUGAUACUGCUGAUUGCCCCGGCAUACAGUAUCAGGUGCAUUGGAGUCAGCAAUAGAGACUUCGUGGAG	......(((((((((((...))))).))))))..........(((..((((....((.((((((((.((...((((..........))))...)))))))))).))..))))..)))...	.......((((((((((...))))).)))))..............................................................((((((.........))))))......	0.48333
897	1016	37	-30.6	0.25	0.57	47.49	UUGCCUGGCUUUUGGGAAGCUCGACGAGCCAAAAAGUCAUAUACUUGGUCAUGAUACUGCUGAUUGCCCCGGCAUACAGUAUCAGGUGCAUUGGAGUCAGCAAUAGAGACUUCGUGGAGG	.....(((((((((((...))))).))))))..........(((..((((....((.((((((((.((...((((..........))))...)))))))))).))..))))..)))....	......(((((..............)))))..............................................................((((((.........)))))).......	0.49167
898	1017	37	-31.1	0.35	0.55	47.32	UGCCUGGCUUUUGGGAAGCUCGACGAGCCAAAAAGUCAUAUACUUGGUCAUGAUACUGCUGAUUGCCCCGGCAUACAGUAUCAGGUGCAUUGGAGUCAGCAAUAGAGACUUCGUGGAGGG	....(((((((((((...))))).))))))......(...(((..((((....((.((((((((.((...((((..........))))...)))))))))).))..))))..)))...).	.....(((((.((.......))..)))))..............................................................((((((.........))))))........	0.5
899	1018	37	-33.8	-0.19	0.37	45.81	GCCUGGCUUUUGGGAAGCUCGACGAGCCAAAAAGUCAUAUACUUGGUCAUGAUACUGCUGAUUGCCCCGGCAUACAGUAUCAGGUGCAUUGGAGUCAGCAAUAGAGACUUCGUGGAGGGC	...(((((((((((...))))).))))))....(((...(((..((((....((.((((((((.((...((((..........))))...)))))))))).))..))))..)))...)))	(((.((((((((((...))))).)))))..............................................................((((((.........))))))......)))	0.50833
900	1019	37	-35.1	-0.96	0.16	19.9	CCUGGCUUUUGGGAAGCUCGACGAGCCAAAAAGUCAUAUACUUGGUCAUGAUACUGCUGAUUGCCCCGGCAUACAGUAUCAGGUGCAUUGGAGUCAGCAAUAGAGACUUCGUGGAGGGCA	..(((((((((((...))))).))))))....(((...(((..((((....((.((((((((.((...((((..........))))...)))))))))).))..))))..)))...))).	..(((((((((((...))))).))))))....(((...(((..((((....((.((((((((.((...((((..........))))...)))))))))).))..))))..)))...))).	0.5
901	1020	37	-35.1	-1.44	0.07	24.27	CUGGCUUUUGGGAAGCUCGACGAGCCAAAAAGUCAUAUACUUGGUCAUGAUACUGCUGAUUGCCCCGGCAUACAGUAUCAGGUGCAUUGGAGUCAGCAAUAGAGACUUCGUGGAGGGCAU	.(((((((((((...))))).))))))....(((...(((..((((....((.((((((((.((...((((..........))))...)))))))))).))..))))..)))...)))..	.(((((((((((...))))).))))))....(((...(((..((((.......((((((((.((...((((..........))))...)))))))))).....))))..)))...)))..	0.49167
902	1021	37	-34.9	-1.1	0.12	24.44	UGGCUUUUGGGAAGCUCGACGAGCCAAAAAGUCAUAUACUUGGUCAUGAUACUGCUGAUUGCCCCGGCAUACAGUAUCAGGUGCAUUGGAGUCAGCAAUAGAGACUUCGUGGAGGGCAUG	(((((((((((...))))).))))))....(((...(((..((((....((.((((((((.((...((((..........))))...)))))))))).))..))))..)))...)))...	(((((((((((...))))).))))))....(((...(((..((((.......((((((((.((...((((..........))))...)))))))))).....))))..)))...)))...	0.49167
903	1022	37	-34.2	-0.71	0.19	26.35	GGCUUUUGGGAAGCUCGACGAGCCAAAAAGUCAUAUACUUGGUCAUGAUACUGCUGAUUGCCCCGGCAUACAGUAUCAGGUGCAUUGGAGUCAGCAAUAGAGACUUCGUGGAGGGCAUGU	((((((((((...))))).))))).....(((...(((..((((....((.((((((((.((...((((..........))))...)))))))))).))..))))..)))...)))....	((((((((((...))))).))))).....(((...(((..((((.......((((((((.((...((((..........))))...)))))))))).....))))..)))...)))....	0.49167
904	1023	37	-32	-0.21	0.37	21.51	GCUUUUGGGAAGCUCGACGAGCCAAAAAGUCAUAUACUUGGUCAUGAUACUGCUGAUUGCCCCGGCAUACAGUAUCAGGUGCAUUGGAGUCAGCAAUAGAGACUUCGUGGAGGGCAUGUC	((((((.((((((((.....(((((............)))))........((((((((.((...((((..........))))...))))))))))...))).)))).).)))))).....	((((((.((((((((......(((..............))).........((((((((.((...((((..........))))...))))))))))...))).)))).).)))))).....	0.49167
905	1024	37	-30.3	-0.13	0.39	29.89	CUUUUGGGAAGCUCGACGAGCCAAAAAGUCAUAUACUUGGUCAUGAUACUGCUGAUUGCCCCGGCAUACAGUAUCAGGUGCAUUGGAGUCAGCAAUAGAGACUUCGUGGAGGGCAUGUCA	((((((.(((((((.....(((((............)))))........((((((((.((...((((..........))))...))))))))))...))).)))).))))))........	((((((.(((((((......(((..............))).........((((((((.((...((((..........))))...))))))))))...))).)))).))))))........	0.48333
906	1025	37	-28.9	0.24	0.52	45.01	UUUUGGGAAGCUCGACGAGCCAAAAAGUCAUAUACUUGGUCAUGAUACUGCUGAUUGCCCCGGCAUACAGUAUCAGGUGCAUUGGAGUCAGCAAUAGAGACUUCGUGGAGGGCAUGUCAG	.............((((.(((...........(((..((((....((.((((((((.((...((((..........))))...)))))))))).))..))))..)))...))).))))..	....((...........................................((((((.......((..............))......))))))........................))..	0.48333
907	1026	37	-29.2	0.46	0.65	43.78	UUUGGGAAGCUCGACGAGCCAAAAAGUCAUAUACUUGGUCAUGAUACUGCUGAUUGCCCCGGCAUACAGUAUCAGGUGCAUUGGAGUCAGCAAUAGAGACUUCGUGGAGGGCAUGUCAGG	.........((.((((.(((...........(((..((((....((.((((((((.((...((((..........))))...)))))))))).))..))))..)))...))).)))))).	.((((.(.(((.......................................................................((((((.........))))))......))).).)))).	0.49167
908	1027	37	-30.5	0.1	0.5	42.29	UUGGGAAGCUCGACGAGCCAAAAAGUCAUAUACUUGGUCAUGAUACUGCUGAUUGCCCCGGCAUACAGUAUCAGGUGCAUUGGAGUCAGCAAUAGAGACUUCGUGGAGGGCAUGUCAGGU	.......(((.((((.(((...........(((..((((....((.((((((((.((...((((..........))))...)))))))))).))..))))..)))...))).)))).)))	........((.((((.(((..............................................................((((((.........))))))......))).)))).)).	0.49167
909	1028	37	-30.7	0.07	0.46	38.08	UGGGAAGCUCGACGAGCCAAAAAGUCAUAUACUUGGUCAUGAUACUGCUGAUUGCCCCGGCAUACAGUAUCAGGUGCAUUGGAGUCAGCAAUAGAGACUUCGUGGAGGGCAUGUCAGGUG	......(((.((((.(((...........(((..((((....((.((((((((.((...((((..........))))...)))))))))).))..))))..)))...))).)))).))).	......(((.((((.(((..............................................................((((((.........))))))......))).)))).))).	0.5
910	1029	37	-30.7	0.17	0.53	37.38	GGGAAGCUCGACGAGCCAAAAAGUCAUAUACUUGGUCAUGAUACUGCUGAUUGCCCCGGCAUACAGUAUCAGGUGCAUUGGAGUCAGCAAUAGAGACUUCGUGGAGGGCAUGUCAGGUGG	.....(((.((((.(((...........(((..((((....((.((((((((.((...((((..........))))...)))))))))).))..))))..)))...))).)))).)))..	.....(((.((((.(((..............................................................((((((.........))))))......))).)))).)))..	0.50833
911	1030	37	-30.7	0.19	0.56	38.29	GGAAGCUCGACGAGCCAAAAAGUCAUAUACUUGGUCAUGAUACUGCUGAUUGCCCCGGCAUACAGUAUCAGGUGCAUUGGAGUCAGCAAUAGAGACUUCGUGGAGGGCAUGUCAGGUGGG	....(((.((((.(((...........(((..((((....((.((((((((.((...((((..........))))...)))))))))).))..))))..)))...))).)))).)))...	....(((.((((.(((..............................................................((((((.........))))))......))).)))).)))...	0.50833
912	1031	37	-30.7	-0.06	0.41	38.58	GAAGCUCGACGAGCCAAAAAGUCAUAUACUUGGUCAUGAUACUGCUGAUUGCCCCGGCAUACAGUAUCAGGUGCAUUGGAGUCAGCAAUAGAGACUUCGUGGAGGGCAUGUCAGGUGGGA	...(((.((((.(((...........(((..((((....((.((((((((.((...((((..........))))...)))))))))).))..))))..)))...))).)))).)))....	...(((.((((.(((..............................................................((((((.........))))))......))).)))).)))....	0.5
913	1032	37	-31.1	-0.13	0.38	43.61	AAGCUCGACGAGCCAAAAAGUCAUAUACUUGGUCAUGAUACUGCUGAUUGCCCCGGCAUACAGUAUCAGGUGCAUUGGAGUCAGCAAUAGAGACUUCGUGGAGGGCAUGUCAGGUGGGAC	..((((...))))......(((...(((((((.((((....((((((((.((...((((..........))))...)))))))))).......((((...)))).))))))))))).)))	......((((.(((............................(((((((......(((............))).....)))))))..................))).)))).........	0.5
914	1033	37	-31.9	-0.37	0.32	43.84	AGCUCGACGAGCCAAAAAGUCAUAUACUUGGUCAUGAUACUGCUGAUUGCCCCGGCAUACAGUAUCAGGUGCAUUGGAGUCAGCAAUAGAGACUUCGUGGAGGGCAUGUCAGGUGGGACC	.((((...))))......(((...(((((((.((((....((((((((.((...((((..........))))...)))))))))).......((((...)))).))))))))))).))).	.((((...))))............................((((((((.((...((((..........))))...))))))))))...................................	0.50833
915	1034	37	-31.7	-0.04	0.47	48.58	GCUCGACGAGCCAAAAAGUCAUAUACUUGGUCAUGAUACUGCUGAUUGCCCCGGCAUACAGUAUCAGGUGCAUUGGAGUCAGCAAUAGAGACUUCGUGGAGGGCAUGUCAGGUGGGACCU	((((...))))......(((...(((((((.((((....((((((((.((...((((..........))))...)))))))))).......((((...)))).))))))))))).)))..	.((.....))................................................................((((((.........)))))).........................	0.50833
916	1035	37	-31.1	0.2	0.54	34.86	CUCGACGAGCCAAAAAGUCAUAUACUUGGUCAUGAUACUGCUGAUUGCCCCGGCAUACAGUAUCAGGUGCAUUGGAGUCAGCAAUAGAGACUUCGUGGAGGGCAUGUCAGGUGGGACCUG	(((.((((......((((.....))))((((....((.((((((((.((...((((..........))))...)))))))))).))..)))))))).))).......(((((...)))))	(((.((((..............................((((((((.((...((((..........))))...)))))))))).........)))).))).......(((((...)))))	0.50833
917	1036	37	-30.9	0.29	0.56	39.4	UCGACGAGCCAAAAAGUCAUAUACUUGGUCAUGAUACUGCUGAUUGCCCCGGCAUACAGUAUCAGGUGCAUUGGAGUCAGCAAUAGAGACUUCGUGGAGGGCAUGUCAGGUGGGACCUGG	..((((.(((...........(((..((((....((.((((((((.((...((((..........))))...)))))))))).))..))))..)))...))).))))((((...))))..	...(((.(((................................................................(((...........)))........))).))).((((...))))..	0.50833
918	1037	37	-30.9	0.38	0.63	43.53	CGACGAGCCAAAAAGUCAUAUACUUGGUCAUGAUACUGCUGAUUGCCCCGGCAUACAGUAUCAGGUGCAUUGGAGUCAGCAAUAGAGACUUCGUGGAGGGCAUGUCAGGUGGGACCUGGG	.((((.(((...........(((..((((....((.((((((((.((...((((..........))))...)))))))))).))..))))..)))...))).))))((((...))))...	..(((.(((..............................................................((((((.........))))))......))).))).((((...))))...	0.51667
919	1038	37	-31.1	0.29	0.6	46.38	GACGAGCCAAAAAGUCAUAUACUUGGUCAUGAUACUGCUGAUUGCCCCGGCAUACAGUAUCAGGUGCAUUGGAGUCAGCAAUAGAGACUUCGUGGAGGGCAUGUCAGGUGGGACCUGGGU	((((.(((...........(((..((((....((.((((((((.((...((((..........))))...)))))))))).))..))))..)))...))).))))((((...))))....	.(((.(((..............................................................((((((.........))))))......))).))).((((...))))....	0.50833
920	1039	37	-31.1	0.08	0.48	42.53	ACGAGCCAAAAAGUCAUAUACUUGGUCAUGAUACUGCUGAUUGCCCCGGCAUACAGUAUCAGGUGCAUUGGAGUCAGCAAUAGAGACUUCGUGGAGGGCAUGUCAGGUGGGACCUGGGUU	...((((.....(((...(((..((((....((.((((((((.((...((((..........))))...)))))))))).))..))))..)))...)))....(((((...)))))))))	..................................((((((((.((...((((..........))))...))))))))))........................((((.....))))....	0.5
921	1040	37	-32.4	-0.06	0.45	40.33	CGAGCCAAAAAGUCAUAUACUUGGUCAUGAUACUGCUGAUUGCCCCGGCAUACAGUAUCAGGUGCAUUGGAGUCAGCAAUAGAGACUUCGUGGAGGGCAUGUCAGGUGGGACCUGGGUUG	(((.(((....(((...(((((((.((((....((((((((.((...((((..........))))...)))))))))).......((((...)))).))))))))))).))).))).)))	.((.((.....(((....((((((.((((....((((((((.((...((((..........))))...))))))))))...................))))))))))..)))..)).)).	0.50833
922	1041	37	-31.9	-0.16	0.4	38.62	GAGCCAAAAAGUCAUAUACUUGGUCAUGAUACUGCUGAUUGCCCCGGCAUACAGUAUCAGGUGCAUUGGAGUCAGCAAUAGAGACUUCGUGGAGGGCAUGUCAGGUGGGACCUGGGUUGA	.((((.....(((...(((..((((....((.((((((((.((...((((..........))))...)))))))))).))..))))..)))...)))....(((((...)))))))))..	.((((...........................((((((((.((...((((..........))))...)))))))))).....................................))))..	0.5
923	1042	37	-31.4	-0.2	0.38	45.95	AGCCAAAAAGUCAUAUACUUGGUCAUGAUACUGCUGAUUGCCCCGGCAUACAGUAUCAGGUGCAUUGGAGUCAGCAAUAGAGACUUCGUGGAGGGCAUGUCAGGUGGGACCUGGGUUGAU	((((.....(((...(((..((((....((.((((((((.((...((((..........))))...)))))))))).))..))))..)))...)))....(((((...)))))))))...	.(((...........................((((((((......((((..........)))).....)))))))).....................................)))....	0.49167
924	1043	37	-30.7	0.46	0.66	36.01	GCCAAAAAGUCAUAUACUUGGUCAUGAUACUGCUGAUUGCCCCGGCAUACAGUAUCAGGUGCAUUGGAGUCAGCAAUAGAGACUUCGUGGAGGGCAUGUCAGGUGGGACCUGGGUUGAUG	..........(((..((((((((.(.((....(((((((((((.((.....((((...))))...((((((.........)))))))).).))))).))))))).))))).))))..)))	...................((((.........(((((((((((.((...................((((((.........)))))))).).))))).)))))....))))..........	0.5
925	1044	37	-31.3	0.06	0.51	25.41	CCAAAAAGUCAUAUACUUGGUCAUGAUACUGCUGAUUGCCCCGGCAUACAGUAUCAGGUGCAUUGGAGUCAGCAAUAGAGACUUCGUGGAGGGCAUGUCAGGUGGGACCUGGGUUGAUGU	.........(((..((((((((.(.((....(((((((((((.((.....((((...))))...((((((.........)))))))).).))))).))))))).))))).))))..))).	.........(((..(((.((((.........(((((((((((.((.....(((.....)))...((((((.........)))))))).).))))).)))))....))))..)))..))).	0.49167
926	1045	37	-31.3	-0.33	0.38	23.4	CAAAAAGUCAUAUACUUGGUCAUGAUACUGCUGAUUGCCCCGGCAUACAGUAUCAGGUGCAUUGGAGUCAGCAAUAGAGACUUCGUGGAGGGCAUGUCAGGUGGGACCUGGGUUGAUGUU	........(((..((((((((.(.((....(((((((((((.((.....((((...))))...((((((.........)))))))).).))))).))))))).))))).))))..)))..	........(((..(((.((((.........(((((((((((.((.....(((.....)))...((((((.........)))))))).).))))).)))))....))))..)))..)))..	0.48333
927	1046	37	-31.3	-0.35	0.34	23.35	AAAAAGUCAUAUACUUGGUCAUGAUACUGCUGAUUGCCCCGGCAUACAGUAUCAGGUGCAUUGGAGUCAGCAAUAGAGACUUCGUGGAGGGCAUGUCAGGUGGGACCUGGGUUGAUGUUG	.......(((..((((((((.(.((....(((((((((((.((.....((((...))))...((((((.........)))))))).).))))).))))))).))))).))))..)))...	.......(((..(((.((((.........(((((((((((.((.....(((.....)))...((((((.........)))))))).).))))).)))))....))))..)))..)))...	0.48333
928	1047	37	-31.3	-0.19	0.37	23.4	AAAAGUCAUAUACUUGGUCAUGAUACUGCUGAUUGCCCCGGCAUACAGUAUCAGGUGCAUUGGAGUCAGCAAUAGAGACUUCGUGGAGGGCAUGUCAGGUGGGACCUGGGUUGAUGUUGU	......(((..((((((((.(.((....(((((((((((.((.....((((...))))...((((((.........)))))))).).))))).))))))).))))).))))..)))....	......(((..(((.((((.........(((((((((((.((.....(((.....)))...((((((.........)))))))).).))))).)))))....))))..)))..)))....	0.48333
929	1048	37	-31.3	0.16	0.5	27.3	AAAGUCAUAUACUUGGUCAUGAUACUGCUGAUUGCCCCGGCAUACAGUAUCAGGUGCAUUGGAGUCAGCAAUAGAGACUUCGUGGAGGGCAUGUCAGGUGGGACCUGGGUUGAUGUUGUC	.....(((..((((((((.(.((....(((((((((((.((.....((((...))))...((((((.........)))))))).).))))).))))))).))))).))))..))).....	.....(((..(((.((((.........(((((((((((.((.....(((.....)))...((((((.........)))))))).).))))).)))))....))))..)))..))).....	0.49167
930	1049	37	-31.3	0.33	0.58	43.61	AAGUCAUAUACUUGGUCAUGAUACUGCUGAUUGCCCCGGCAUACAGUAUCAGGUGCAUUGGAGUCAGCAAUAGAGACUUCGUGGAGGGCAUGUCAGGUGGGACCUGGGUUGAUGUUGUCU	....(((..((((((((.(.((....(((((((((((.((.....((((...))))...((((((.........)))))))).).))))).))))))).))))).))))..)))......	.............((((..........((((((((((......................((((((.........))))))...).))))).)))).....))))................	0.49167
931	1050	37	-31.3	0.22	0.53	46.42	AGUCAUAUACUUGGUCAUGAUACUGCUGAUUGCCCCGGCAUACAGUAUCAGGUGCAUUGGAGUCAGCAAUAGAGACUUCGUGGAGGGCAUGUCAGGUGGGACCUGGGUUGAUGUUGUCUU	...(((..((((((((.(.((....(((((((((((.((.....((((...))))...((((((.........)))))))).).))))).))))))).))))).))))..))).......	.............(((...............((.........................((((((.........)))))).......))...........)))..................	0.49167
932	1051	37	-31.3	0.45	0.66	47.66	GUCAUAUACUUGGUCAUGAUACUGCUGAUUGCCCCGGCAUACAGUAUCAGGUGCAUUGGAGUCAGCAAUAGAGACUUCGUGGAGGGCAUGUCAGGUGGGACCUGGGUUGAUGUUGUCUUG	..(((..((((((((.(.((....(((((((((((.((.....((((...))))...((((((.........)))))))).).))))).))))))).))))).))))..)))........	.........................................................((((((.........))))))..........................................	0.5
933	1052	37	-31.3	0.47	0.66	46.84	UCAUAUACUUGGUCAUGAUACUGCUGAUUGCCCCGGCAUACAGUAUCAGGUGCAUUGGAGUCAGCAAUAGAGACUUCGUGGAGGGCAUGUCAGGUGGGACCUGGGUUGAUGUUGUCUUGG	.(((..((((((((.(.((....(((((((((((.((.....((((...))))...((((((.........)))))))).).))))).))))))).))))).))))..))).........	........................................................((((((.........))))))...((.((((...((((.....))))......)))).))....	0.5
934	1053	37	-31.2	0.54	0.66	43.45	CAUAUACUUGGUCAUGAUACUGCUGAUUGCCCCGGCAUACAGUAUCAGGUGCAUUGGAGUCAGCAAUAGAGACUUCGUGGAGGGCAUGUCAGGUGGGACCUGGGUUGAUGUUGUCUUGGA	(((..((((((((.(.((....(((((((((((.((.....((((...))))...((((((.........)))))))).).))))).))))))).))))).))))..)))..........	..........((.........(((((((......((((..........)))).....))))))).......))......((.((((...(((((...)))))......)))).)).....	0.5
935	1054	37	-31.7	0.12	0.5	26.93	AUAUACUUGGUCAUGAUACUGCUGAUUGCCCCGGCAUACAGUAUCAGGUGCAUUGGAGUCAGCAAUAGAGACUUCGUGGAGGGCAUGUCAGGUGGGACCUGGGUUGAUGUUGUCUUGGAA	........((((....((.((((((((.((...((((..........))))...)))))))))).))..))))((..(((.(((((..(((((...))))).....))))).)))..)).	........((((.......((((((((.((...((((..........))))...)))))))))).....))))....(((.(((((.((((((...))))))....))))).))).....	0.49167
936	1055	37	-31.7	0.35	0.55	26.13	UAUACUUGGUCAUGAUACUGCUGAUUGCCCCGGCAUACAGUAUCAGGUGCAUUGGAGUCAGCAAUAGAGACUUCGUGGAGGGCAUGUCAGGUGGGACCUGGGUUGAUGUUGUCUUGGAAC	.......((((....((.((((((((.((...((((..........))))...)))))))))).))..))))((..(((.(((((..(((((...))))).....))))).)))..))..	.......((((.......((((((((.((...((((..........))))...)))))))))).....))))....(((.(((((.((((((...))))))....))))).)))......	0.5
937	1056	37	-31.7	0.12	0.49	28.72	AUACUUGGUCAUGAUACUGCUGAUUGCCCCGGCAUACAGUAUCAGGUGCAUUGGAGUCAGCAAUAGAGACUUCGUGGAGGGCAUGUCAGGUGGGACCUGGGUUGAUGUUGUCUUGGAACA	......((((....((.((((((((.((...((((..........))))...)))))))))).))..))))((..(((.(((((..(((((...))))).....))))).)))..))...	......((((.......((((((((.((...((((..........))))...)))))))))).....))))....(((.(((((.((((((...))))))....))))).))).......	0.5
938	1057	37	-31.7	0.33	0.6	34.23	UACUUGGUCAUGAUACUGCUGAUUGCCCCGGCAUACAGUAUCAGGUGCAUUGGAGUCAGCAAUAGAGACUUCGUGGAGGGCAUGUCAGGUGGGACCUGGGUUGAUGUUGUCUUGGAACAU	.....((((....((.((((((((.((...((((..........))))...)))))))))).))..))))((..(((.(((((..(((((...))))).....))))).)))..))....	......(((.......((((((((.((...((((..........))))...)))))))))).....))).....(((.(((((..(((((...))))).....))))).)))........	0.5
939	1058	37	-31.7	0.41	0.63	38.28	ACUUGGUCAUGAUACUGCUGAUUGCCCCGGCAUACAGUAUCAGGUGCAUUGGAGUCAGCAAUAGAGACUUCGUGGAGGGCAUGUCAGGUGGGACCUGGGUUGAUGUUGUCUUGGAACAUG	....((((....((.((((((((.((...((((..........))))...)))))))))).))..))))((..(((.(((((..(((((...))))).....))))).)))..)).....	.....(((.......((((((((.((...((((..........))))...)))))))))).....))).....(((.((((...(((((...)))))......)))).))).........	0.50833
940	1059	37	-31.7	0.82	0.78	34.54	CUUGGUCAUGAUACUGCUGAUUGCCCCGGCAUACAGUAUCAGGUGCAUUGGAGUCAGCAAUAGAGACUUCGUGGAGGGCAUGUCAGGUGGGACCUGGGUUGAUGUUGUCUUGGAACAUGG	...((((....((.((((((((.((...((((..........))))...)))))))))).))..))))((..(((.(((((..(((((...))))).....))))).)))..))......	....(((.......((((((((.((...((((..........))))...)))))))))).....))).....(((.(((((..(((((...))))).....))))).)))..........	0.51667
941	1060	37	-31.7	0.25	0.58	31.37	UUGGUCAUGAUACUGCUGAUUGCCCCGGCAUACAGUAUCAGGUGCAUUGGAGUCAGCAAUAGAGACUUCGUGGAGGGCAUGUCAGGUGGGACCUGGGUUGAUGUUGUCUUGGAACAUGGA	..((((....((.((((((((.((...((((..........))))...)))))))))).))..))))((..(((.(((((..(((((...))))).....))))).)))..)).......	...(((.......((((((((.((...((((..........))))...)))))))))).....))).....(((.((((...(((((...)))))......)))).)))...........	0.50833
942	1061	37	-31.7	0.45	0.64	34.22	UGGUCAUGAUACUGCUGAUUGCCCCGGCAUACAGUAUCAGGUGCAUUGGAGUCAGCAAUAGAGACUUCGUGGAGGGCAUGUCAGGUGGGACCUGGGUUGAUGUUGUCUUGGAACAUGGAG	.((((....((.((((((((.((...((((..........))))...)))))))))).))..))))((..(((.(((((..(((((...))))).....))))).)))..))........	...((.......((((((((.((...((((..........))))...)))))))))).....)).......((.((((...(((((...)))))......)))).)).............	0.51667
943	1062	37	-32.8	0.28	0.54	28.13	GGUCAUGAUACUGCUGAUUGCCCCGGCAUACAGUAUCAGGUGCAUUGGAGUCAGCAAUAGAGACUUCGUGGAGGGCAUGUCAGGUGGGACCUGGGUUGAUGUUGUCUUGGAACAUGGAGG	...........((((((((.((...((((..........))))...)))))))))).......(((((((((.(((((..(((((...))))).....))))).))......))))))).	...........((((((((.((...((((..........))))...)))))))))).......(((((((..........((((.....))))...................))))))).	0.525
944	1063	37	-32.8	0.39	0.61	24.93	GUCAUGAUACUGCUGAUUGCCCCGGCAUACAGUAUCAGGUGCAUUGGAGUCAGCAAUAGAGACUUCGUGGAGGGCAUGUCAGGUGGGACCUGGGUUGAUGUUGUCUUGGAACAUGGAGGC	..........((((((((.((...((((..........))))...)))))))))).......(((((((((.(((((..(((((...))))).....))))).))......)))))))..	..........((((((((.((...((((..........))))...)))))))))).......(((((((..........((((.....))))...................)))))))..	0.525
945	1064	37	-32.8	0.17	0.5	22.34	UCAUGAUACUGCUGAUUGCCCCGGCAUACAGUAUCAGGUGCAUUGGAGUCAGCAAUAGAGACUUCGUGGAGGGCAUGUCAGGUGGGACCUGGGUUGAUGUUGUCUUGGAACAUGGAGGCU	.........((((((((.((...((((..........))))...)))))))))).......(((((((((.(((((..(((((...))))).....))))).))......)))))))...	.........((((((((.((...((((..........))))...)))))))))).......(((((((..((((....((((.....))))..........)))).....)))))))...	0.51667
946	1065	37	-33.5	0.24	0.56	19.35	CAUGAUACUGCUGAUUGCCCCGGCAUACAGUAUCAGGUGCAUUGGAGUCAGCAAUAGAGACUUCGUGGAGGGCAUGUCAGGUGGGACCUGGGUUGAUGUUGUCUUGGAACAUGGAGGCUG	........((((((((.((...((((..........))))...))))))))))....((.(((((((((.(((((..(((((...))))).....))))).))......))))))).)).	........((((((((.((...((((..........))))...))))))))))....((.(((((((..((((...(.(((.....)))......)....)))).....))))))).)).	0.525
947	1066	37	-33.5	0.25	0.58	19.13	AUGAUACUGCUGAUUGCCCCGGCAUACAGUAUCAGGUGCAUUGGAGUCAGCAAUAGAGACUUCGUGGAGGGCAUGUCAGGUGGGACCUGGGUUGAUGUUGUCUUGGAACAUGGAGGCUGC	.......((((((((.((...((((..........))))...))))))))))....((.(((((((((.(((((..(((((...))))).....))))).))......))))))).))..	.......((((((((.((...((((..........))))...))))))))))....((.(((((((..((((..((.(((.....)))......))...)))).....))))))).))..	0.525
948	1067	37	-33.5	0.5	0.66	21.96	UGAUACUGCUGAUUGCCCCGGCAUACAGUAUCAGGUGCAUUGGAGUCAGCAAUAGAGACUUCGUGGAGGGCAUGUCAGGUGGGACCUGGGUUGAUGUUGUCUUGGAACAUGGAGGCUGCG	......((((((((.((...((((..........))))...))))))))))....((.(((((((((.(((((..(((((...))))).....))))).))......))))))).))...	......((((((((.((...((((..........))))...))))))))))....((.(((((((..((((....((((.....))))..........)))).....))))))).))...	0.53333
949	1068	37	-33.5	0.27	0.55	23.3	GAUACUGCUGAUUGCCCCGGCAUACAGUAUCAGGUGCAUUGGAGUCAGCAAUAGAGACUUCGUGGAGGGCAUGUCAGGUGGGACCUGGGUUGAUGUUGUCUUGGAACAUGGAGGCUGCGU	.....((((((((.((...((((..........))))...))))))))))....((.(((((((((.(((((..(((((...))))).....))))).))......))))))).))....	.....((((((((.((...((((..........))))...))))))))))....((.(((((((..((((....((((.....))))..........)))).....))))))).))....	0.53333
950	1069	37	-33.5	0.15	0.52	23.95	AUACUGCUGAUUGCCCCGGCAUACAGUAUCAGGUGCAUUGGAGUCAGCAAUAGAGACUUCGUGGAGGGCAUGUCAGGUGGGACCUGGGUUGAUGUUGUCUUGGAACAUGGAGGCUGCGUU	....((((((((.((...((((..........))))...))))))))))....((.(((((((((.(((((..(((((...))))).....))))).))......))))))).)).....	....((((((((.((...((((..........))))...))))))))))....((.(((((((..((((.....(((.....)))...........)))).....))))))).)).....	0.525
951	1070	37	-33.5	0.31	0.61	34.65	UACUGCUGAUUGCCCCGGCAUACAGUAUCAGGUGCAUUGGAGUCAGCAAUAGAGACUUCGUGGAGGGCAUGUCAGGUGGGACCUGGGUUGAUGUUGUCUUGGAACAUGGAGGCUGCGUUA	...((((((((.((...((((..........))))...))))))))))....((.(((((((((.(((((..(((((...))))).....))))).))......))))))).))......	...((((((((.((...((((..........))))...))))))))))....((.(((((((...........(((.....)))....................))))))).))......	0.525
952	1071	37	-33.7	0.49	0.65	39.63	ACUGCUGAUUGCCCCGGCAUACAGUAUCAGGUGCAUUGGAGUCAGCAAUAGAGACUUCGUGGAGGGCAUGUCAGGUGGGACCUGGGUUGAUGUUGUCUUGGAACAUGGAGGCUGCGUUAC	..((((((((.((...((((..........))))...))))))))))..........((((.....))))((((((...))))))..((((((.(((((........))))).)))))).	..((((((((.((...((((..........))))...)))))))))).......(((((((............((.....)).....................)))))))..........	0.53333
953	1072	37	-34.9	0.29	0.54	36.46	CUGCUGAUUGCCCCGGCAUACAGUAUCAGGUGCAUUGGAGUCAGCAAUAGAGACUUCGUGGAGGGCAUGUCAGGUGGGACCUGGGUUGAUGUUGUCUUGGAACAUGGAGGCUGCGUUACC	.((((((((.((...((((..........))))...))))))))))..........((((.....)))).(((((...)))))(((.(((((.(((((........))))).))))))))	.....((..(((((......................((((((.........))))))...).))))...))............((..(((((.(((((........))))).))))).))	0.54167
954	1073	37	-36.3	-0.09	0.42	29.82	UGCUGAUUGCCCCGGCAUACAGUAUCAGGUGCAUUGGAGUCAGCAAUAGAGACUUCGUGGAGGGCAUGUCAGGUGGGACCUGGGUUGAUGUUGUCUUGGAACAUGGAGGCUGCGUUACCG	((((((((.((...((((..........))))...))))))))))..........((((.....)))).(((((...)))))(((.(((((.(((((........))))).)))))))).	.(((((((......((((..........)))).....))))))).........................(((((...)))))((..(((((.(((((........))))).))))).)).	0.54167
955	1074	37	-36	0.05	0.49	28.11	GCUGAUUGCCCCGGCAUACAGUAUCAGGUGCAUUGGAGUCAGCAAUAGAGACUUCGUGGAGGGCAUGUCAGGUGGGACCUGGGUUGAUGUUGUCUUGGAACAUGGAGGCUGCGUUACCGU	.(((((((((((.((.....((((...))))...((((((.........)))))))).).))))).)))))..........(((.(((((.(((((........))))).))))))))..	......((((((.((...................((((((.........)))))))).).)))))....(((.....))).((..(((((.(((((........))))).))))).))..	0.54167
956	1075	37	-35.9	-0.13	0.46	15.04	CUGAUUGCCCCGGCAUACAGUAUCAGGUGCAUUGGAGUCAGCAAUAGAGACUUCGUGGAGGGCAUGUCAGGUGGGACCUGGGUUGAUGUUGUCUUGGAACAUGGAGGCUGCGUUACCGUG	(((((((((((.((.....((((...))))...((((((.........)))))))).).))))).)))))..........(((.(((((.(((((........))))).))))))))...	(((((((((((.((.....(((.....)))...((((((.........)))))))).).))))).)))))..........((..(((((.(((((........))))).))))).))...	0.54167
957	1076	37	-35.4	-0.27	0.34	11.77	UGAUUGCCCCGGCAUACAGUAUCAGGUGCAUUGGAGUCAGCAAUAGAGACUUCGUGGAGGGCAUGUCAGGUGGGACCUGGGUUGAUGUUGUCUUGGAACAUGGAGGCUGCGUUACCGUGA	....((((((.((.....((((...))))...((((((.........)))))))).).)))))...(((((...)))))(((.(((((.(((((........))))).))))))))....	....((((((.((.....((((...))))...((((((.........)))))))).).)))))...(((((...)))))(((.(((((.(((((........))))).))))))))....	0.53333
958	1077	37	-35.4	-0.06	0.37	11.36	GAUUGCCCCGGCAUACAGUAUCAGGUGCAUUGGAGUCAGCAAUAGAGACUUCGUGGAGGGCAUGUCAGGUGGGACCUGGGUUGAUGUUGUCUUGGAACAUGGAGGCUGCGUUACCGUGAU	...((((((.((.....((((...))))...((((((.........)))))))).).)))))...(((((...)))))(((.(((((.(((((........))))).)))))))).....	...((((((.((.....((((...))))...((((((.........)))))))).).)))))...(((((...)))))(((.(((((.(((((........))))).)))))))).....	0.53333
959	1078	37	-35.4	-0.15	0.4	10.42	AUUGCCCCGGCAUACAGUAUCAGGUGCAUUGGAGUCAGCAAUAGAGACUUCGUGGAGGGCAUGUCAGGUGGGACCUGGGUUGAUGUUGUCUUGGAACAUGGAGGCUGCGUUACCGUGAUG	..((((((.((.....((((...))))...((((((.........)))))))).).)))))...(((((...)))))(((.(((((.(((((........))))).))))))))......	..((((((.((.....(((.....)))...((((((.........)))))))).).)))))...(((((...)))))(((.(((((.(((((........))))).))))))))......	0.53333
960	1079	37	-35.4	0.02	0.46	10.42	UUGCCCCGGCAUACAGUAUCAGGUGCAUUGGAGUCAGCAAUAGAGACUUCGUGGAGGGCAUGUCAGGUGGGACCUGGGUUGAUGUUGUCUUGGAACAUGGAGGCUGCGUUACCGUGAUGG	.((((((.((.....((((...))))...((((((.........)))))))).).)))))...(((((...)))))(((.(((((.(((((........))))).)))))))).......	.((((((.((.....(((.....)))...((((((.........)))))))).).)))))...(((((...)))))((..(((((.(((((........))))).))))).)).......	0.54167
961	1080	37	-35.2	0.22	0.57	11.08	UGCCCCGGCAUACAGUAUCAGGUGCAUUGGAGUCAGCAAUAGAGACUUCGUGGAGGGCAUGUCAGGUGGGACCUGGGUUGAUGUUGUCUUGGAACAUGGAGGCUGCGUUACCGUGAUGGC	((((((.((.....((((...))))...((((((.........)))))))).).)))))...(((((...)))))(((.(((((.(((((........))))).))))))))........	((((((.((.....(((.....)))...((((((.........)))))))).).)))))...(((((...)))))((..(((((.(((((........))))).))))).))........	0.55
962	1081	37	-34.7	0.32	0.6	15.78	GCCCCGGCAUACAGUAUCAGGUGCAUUGGAGUCAGCAAUAGAGACUUCGUGGAGGGCAUGUCAGGUGGGACCUGGGUUGAUGUUGUCUUGGAACAUGGAGGCUGCGUUACCGUGAUGGCA	(((((.((.....((((...))))...((((((.........)))))))).).))))....(((((...)))))(((.(((((.(((((........))))).)))))))).........	(((((.((.....(((.....)))...((((((.........)))))))).).))))....(((((...)))))((..(((((.(((((........))))).))))).)).........	0.55
963	1082	37	-30.4	1.63	0.95	28.12	CCCCGGCAUACAGUAUCAGGUGCAUUGGAGUCAGCAAUAGAGACUUCGUGGAGGGCAUGUCAGGUGGGACCUGGGUUGAUGUUGUCUUGGAACAUGGAGGCUGCGUUACCGUGAUGGCAC	.((((.(..(((((......(.(((.((((((.........))))))))).)..)).)))..).)))).((..(((.(((((.(((((........))))).)))))))).....))...	..........................((((((.........)))))).............((((.....))))((..(((((.(((((........))))).))))).))..........	0.55
964	1083	37	-31	1.44	0.91	27.5	CCCGGCAUACAGUAUCAGGUGCAUUGGAGUCAGCAAUAGAGACUUCGUGGAGGGCAUGUCAGGUGGGACCUGGGUUGAUGUUGUCUUGGAACAUGGAGGCUGCGUUACCGUGAUGGCACA	((((.(..(((((......(.(((.((((((.........))))))))).)..)).)))..).)))).....(((.(((((.(((((........))))).))))))))(((....))).	.........................((((((.........)))))).............((((.....))))((..(((((.(((((........))))).))))).))(((....))).	0.54167
965	1084	37	-30.3	1.32	0.91	22.24	CCGGCAUACAGUAUCAGGUGCAUUGGAGUCAGCAAUAGAGACUUCGUGGAGGGCAUGUCAGGUGGGACCUGGGUUGAUGUUGUCUUGGAACAUGGAGGCUGCGUUACCGUGAUGGCACAG	..(.(((((......(.((((..(((((((.........)))))))......)))).)(((((...)))))(((.(((((.(((((........))))).)))))))))).))).)....	........................((((((.........)))))).............(((((...)))))((..(((((.(((((........))))).))))).))............	0.54167
966	1085	37	-30.3	1.11	0.89	22.19	CGGCAUACAGUAUCAGGUGCAUUGGAGUCAGCAAUAGAGACUUCGUGGAGGGCAUGUCAGGUGGGACCUGGGUUGAUGUUGUCUUGGAACAUGGAGGCUGCGUUACCGUGAUGGCACAGG	.(.(((((......(.((((..(((((((.........)))))))......)))).)(((((...)))))(((.(((((.(((((........))))).)))))))))).))).).....	.......................((((((.........)))))).............(((((...)))))((..(((((.(((((........))))).))))).)).............	0.54167
967	1086	37	-31.7	0.48	0.65	16.8	GGCAUACAGUAUCAGGUGCAUUGGAGUCAGCAAUAGAGACUUCGUGGAGGGCAUGUCAGGUGGGACCUGGGUUGAUGUUGUCUUGGAACAUGGAGGCUGCGUUACCGUGAUGGCACAGGA	...........((..((((...((((((.........))))))(((.....)))..(((((...)))))(((.(((((.(((((........))))).))))))))......))))..))	...........((..((((...((((((.........))))))(((.....)))..(((((...)))))((..(((((.(((((........))))).))))).))......))))..))	0.53333
968	1087	37	-32	0.3	0.6	17.22	GCAUACAGUAUCAGGUGCAUUGGAGUCAGCAAUAGAGACUUCGUGGAGGGCAUGUCAGGUGGGACCUGGGUUGAUGUUGUCUUGGAACAUGGAGGCUGCGUUACCGUGAUGGCACAGGAC	..........((..((((...((((((.........))))))(((.....)))..(((((...)))))(((.(((((.(((((........))))).))))))))......))))..)).	..........((..((((...((((((.........))))))(((.....)))..(((((...)))))((..(((((.(((((........))))).))))).))......))))..)).	0.53333
969	1088	37	-32	0.08	0.51	25.44	CAUACAGUAUCAGGUGCAUUGGAGUCAGCAAUAGAGACUUCGUGGAGGGCAUGUCAGGUGGGACCUGGGUUGAUGUUGUCUUGGAACAUGGAGGCUGCGUUACCGUGAUGGCACAGGACA	.........((..((((...((((((.........))))))(((.....)))..(((((...)))))(((.(((((.(((((........))))).))))))))......))))..))..	.........((..((((...((((((.........))))))(((.....)))..(((((...)))))((..(((((.(((((........))))).))))).))......))))..))..	0.525
970	1089	37	-32	-0.03	0.42	29.42	AUACAGUAUCAGGUGCAUUGGAGUCAGCAAUAGAGACUUCGUGGAGGGCAUGUCAGGUGGGACCUGGGUUGAUGUUGUCUUGGAACAUGGAGGCUGCGUUACCGUGAUGGCACAGGACAA	........((..((((...((((((.........))))))(((.....)))..(((((...)))))(((.(((((.(((((........))))).))))))))......))))..))...	.........(..((((...((((((.........)))))).((.....))...(((((...)))))((..(((((.(((((........))))).))))).))......))))..)....	0.51667
971	1090	37	-32	0.12	0.5	32.37	UACAGUAUCAGGUGCAUUGGAGUCAGCAAUAGAGACUUCGUGGAGGGCAUGUCAGGUGGGACCUGGGUUGAUGUUGUCUUGGAACAUGGAGGCUGCGUUACCGUGAUGGCACAGGACAAG	.......((..((((...((((((.........))))))(((.....)))..(((((...)))))(((.(((((.(((((........))))).))))))))......))))..))....	...........(((....((((((.........)))))).............(((((...)))))((..(((((.(((((........))))).))))).)).......)))........	0.525
972	1091	37	-32	0.09	0.5	32.56	ACAGUAUCAGGUGCAUUGGAGUCAGCAAUAGAGACUUCGUGGAGGGCAUGUCAGGUGGGACCUGGGUUGAUGUUGUCUUGGAACAUGGAGGCUGCGUUACCGUGAUGGCACAGGACAAGC	......((..((((...((((((.........))))))(((.....)))..(((((...)))))(((.(((((.(((((........))))).))))))))......))))..)).....	.................((((((.........)))))).............(((((...)))))((..(((((.(((((........))))).))))).))...................	0.53333
973	1092	37	-34.9	0.12	0.47	8.63	CAGUAUCAGGUGCAUUGGAGUCAGCAAUAGAGACUUCGUGGAGGGCAUGUCAGGUGGGACCUGGGUUGAUGUUGUCUUGGAACAUGGAGGCUGCGUUACCGUGAUGGCACAGGACAAGCC	..........(.(((.((((((.........))))))))).).(((.((((..(((.......(((.(((((.(((((........))))).)))))))).......)))..)))).)))	............((.(((((((.........)))))))))...(((.((((..(((.......((..(((((.(((((........))))).))))).)).......)))..)))).)))	0.54167
974	1093	37	-36.3	-1.02	0.16	7.16	AGUAUCAGGUGCAUUGGAGUCAGCAAUAGAGACUUCGUGGAGGGCAUGUCAGGUGGGACCUGGGUUGAUGUUGUCUUGGAACAUGGAGGCUGCGUUACCGUGAUGGCACAGGACAAGCCA	.........(.(((.((((((.........))))))))).).(((.((((..(((.......(((.(((((.(((((........))))).)))))))).......)))..)))).))).	...........((.(((((((.........)))))))))...(((.((((..(((.......((..(((((.(((((........))))).))))).)).......)))..)))).))).	0.53333
975	1094	37	-36.3	-0.86	0.2	7.44	GUAUCAGGUGCAUUGGAGUCAGCAAUAGAGACUUCGUGGAGGGCAUGUCAGGUGGGACCUGGGUUGAUGUUGUCUUGGAACAUGGAGGCUGCGUUACCGUGAUGGCACAGGACAAGCCAA	........(.(((.((((((.........))))))))).).(((.((((..(((.......(((.(((((.(((((........))))).)))))))).......)))..)))).)))..	..........((.(((((((.........)))))))))...(((.((((..(((.......((..(((((.(((((........))))).))))).)).......)))..)))).)))..	0.53333
976	1095	37	-36.3	-0.84	0.2	6.43	UAUCAGGUGCAUUGGAGUCAGCAAUAGAGACUUCGUGGAGGGCAUGUCAGGUGGGACCUGGGUUGAUGUUGUCUUGGAACAUGGAGGCUGCGUUACCGUGAUGGCACAGGACAAGCCAAC	.......(.(((.((((((.........))))))))).).(((.((((..(((.......(((.(((((.(((((........))))).)))))))).......)))..)))).)))...	.......(.((.(((((((.........))))))))).).(((.((((..(((.......((..(((((.(((((........))))).))))).)).......)))..)))).)))...	0.53333
977	1096	37	-36.3	-0.83	0.22	8.98	AUCAGGUGCAUUGGAGUCAGCAAUAGAGACUUCGUGGAGGGCAUGUCAGGUGGGACCUGGGUUGAUGUUGUCUUGGAACAUGGAGGCUGCGUUACCGUGAUGGCACAGGACAAGCCAACA	......(.(((.((((((.........))))))))).).(((.((((..(((.......(((.(((((.(((((........))))).)))))))).......)))..)))).)))....	........((.(((((((.........)))))))))...(((.((((..(((.......((..(((((.(((((........))))).))))).)).......)))..)))).)))....	0.53333
978	1097	37	-36.3	-0.71	0.24	9.3	UCAGGUGCAUUGGAGUCAGCAAUAGAGACUUCGUGGAGGGCAUGUCAGGUGGGACCUGGGUUGAUGUUGUCUUGGAACAUGGAGGCUGCGUUACCGUGAUGGCACAGGACAAGCCAACAG	.....(.(((.((((((.........))))))))).).(((.((((..(((.......(((.(((((.(((((........))))).)))))))).......)))..)))).))).....	.......((.(((((((.........)))))))))...(((.((((..(((.......((..(((((.(((((........))))).))))).)).......)))..)))).))).....	0.54167
979	1098	37	-36.3	-0.73	0.23	8.38	CAGGUGCAUUGGAGUCAGCAAUAGAGACUUCGUGGAGGGCAUGUCAGGUGGGACCUGGGUUGAUGUUGUCUUGGAACAUGGAGGCUGCGUUACCGUGAUGGCACAGGACAAGCCAACAGU	....(.(((.((((((.........))))))))).).(((.((((..(((.......(((.(((((.(((((........))))).)))))))).......)))..)))).)))......	......((.(((((((.........)))))))))...(((.((((..(((.......((..(((((.(((((........))))).))))).)).......)))..)))).)))......	0.54167
980	1099	37	-36.3	-0.6	0.27	7.56	AGGUGCAUUGGAGUCAGCAAUAGAGACUUCGUGGAGGGCAUGUCAGGUGGGACCUGGGUUGAUGUUGUCUUGGAACAUGGAGGCUGCGUUACCGUGAUGGCACAGGACAAGCCAACAGUC	...(.(((.((((((.........))))))))).).(((.((((..(((.......(((.(((((.(((((........))))).)))))))).......)))..)))).))).......	.....((.(((((((.........)))))))))...(((.((((..(((.......((..(((((.(((((........))))).))))).)).......)))..)))).))).......	0.54167
981	1100	37	-36.3	-0.42	0.36	7.91	GGUGCAUUGGAGUCAGCAAUAGAGACUUCGUGGAGGGCAUGUCAGGUGGGACCUGGGUUGAUGUUGUCUUGGAACAUGGAGGCUGCGUUACCGUGAUGGCACAGGACAAGCCAACAGUCG	..(.(((.((((((.........))))))))).).(((.((((..(((.......(((.(((((.(((((........))))).)))))))).......)))..)))).)))........	....((.(((((((.........)))))))))...(((.((((..(((.......((..(((((.(((((........))))).))))).)).......)))..)))).)))........	0.55
982	1101	37	-36.3	-0.58	0.31	7.86	GUGCAUUGGAGUCAGCAAUAGAGACUUCGUGGAGGGCAUGUCAGGUGGGACCUGGGUUGAUGUUGUCUUGGAACAUGGAGGCUGCGUUACCGUGAUGGCACAGGACAAGCCAACAGUCGA	.(.(((.((((((.........))))))))).).(((.((((..(((.......(((.(((((.(((((........))))).)))))))).......)))..)))).))).........	...((.(((((((.........)))))))))...(((.((((..(((.......((..(((((.(((((........))))).))))).)).......)))..)))).))).........	0.54167
[truncated: 9,693 more rows]

## Sheet: Zika SF1 Di 100
i	j	Temperature	Native_dG	Z-score	P-score	EnsembleDiversity	Sequence	Structure	Centroid	NC_012532.1
[truncated: 10,675 more rows]

[truncated: 26 more sheets: Zika SF1 Mono 1000, Zika SF1 Di 1000, Zika SF1 Mono 10000, Zika SF1 Di 10000, Zika SF2 Mono , Zika SF2 Di, HIV SF1 Mono 100, HIV SF1 Di 100, HIV SF1 Mono 1000, HIV SF1 Di 1000, HIV SF1 Mono 10000, HIV SF1 Di 10000, HIV SF2 Mono, HIV SF2 Di, SARS SF1 Mono 100, SARS SF1 Di 100, SARS SF1 Mono 1000, SARS SF1 Di 1000, SARS SF1 Mono 10000, SARS SF1 Di 10000 …]
